# Supplementary material for: TAPBPR mediates peptide dissociation from MHC class I using a leucine lever
Source: eLife. 2018 Nov 28;7:e40126. doi: 10.7554/eLife.40126 (PMC6307860; doi:10.7554/eLife.40126)
Supplement: Figure 5—source data 2. [file elife-40126-fig5-data2.xlsx]

## Sheet: Filteredpeptides
A6	Sequence	# PSMs	# Proteins	# Protein Groups	Protein Group Accessions	Modifications	ΔCn	Area	q-Value	PEP	XCorr	Charge	MH+ [Da]	ΔM [ppm]	RT [min]	# Missed Cleavages	best_Syf_Allele	best_Syf_Score	best_NetMHC_Allele_Rank	best_NetMHC_Rank
High	SKLPIGDVATQY	22	1	1	Q99832		0	1.24654e+07	0	1.735e-10	4.85792	2	1291.69	-0.215886	66.1754	0		0	B1503	1.2346
High	YGYDNVKEY	15	1	1	Q96GN5		0	8.0937e+06	0	1.058e-07	4.22271	2	1150.5	-0.819911	50.3441	0	C1203	59.26	C1203	0.0081
High	GQYGNPLNKY	52	1	1	O14672		0	1.52032e+08	0	3.739e-07	4.14994	2	1153.56	-1.07993	52.1044	0	C1203	34.29	B1503	0.0242
High	VKYIQQENF	20	1	1	Q6PJF5		0	6.55705e+06	0	4.472e-07	4.1195	2	1168.6	-0.899273	54.2368	0	C1203	37.04	B1503	0.1248
High	YKIGDLTGY	25	1	1	Q9NVN8		0	3.10163e+07	0	6.618e-07	4.09433	2	1029.52	-1.03528	66.5841	0	C1203	44.44	B1503	0.0506
High	AKKISQLGY	18	1	1	P26196		0	5.56185e+06	0	0.0001321	4.05351	2	1007.59	-0.802165	38.9275	0	C1203	44.44	B1503	0.2744
High	KKPITTGGVTY	20	1	1	Q14192		0	9.24609e+06	0	1.511e-06	3.98497	2	1164.66	-0.472701	39.1424	0		0	B1503	0.9535
High	AAASAIKVI	22	1	1	P14902		0	2.02932e+07	0	5.556e-05	3.97463	2	843.53	-0.27462	54.0863	0	C1203	88.89	C1203	0.427
High	IKISEGTGF	10	1	1	Q9Y2R4		0	2.58772e+06	0	2.295e-05	3.97385	2	951.514	-0.883635	57.1929	0	C1203	33.33	B1503	0.0238
High	KQFPEVIKY	44	1	1	Q9UIF9		0	4.00676e+07	0	1.078e-06	3.96813	2	1151.64	-1.09442	56.3685	0	C1203	55.56	B1503	0.0014
High	ALIEFIRSEY	17	1	1	P26639		0	4.50273e+06	0	6.484e-08	3.95731	2	1240.66	-0.186417	81.4696	0	C1203	31.43	B1503	1.0203
High	LANGEVRIY	5	1	1	Q8NFJ9		0	2.49729e+06	0	1.816e-05	3.94051	2	1034.56	-0.989842	55.1394	0	C1203	85.19	C1203	0.4983
High	EAFQGTKVFV	18	1	1	P61289		0	9.47736e+06	0	2.858e-05	3.93533	2	1125.59	-0.0192174	65.7819	0	C1203	68.57	A6802	0.1825
High	GKLPAGGVLY	17	1	1	P48634		0	9.95375e+06	0	2.507e-05	3.90819	2	974.566	-0.989874	60.3824	0	C1203	34.29	B1503	0.1953
High	KAFQKIVVL	82	2	2	Q7L1Q6;Q9Y6E2		0	1.86064e+08	0	0.001477	3.89188	2	1045.68	-0.656265	60.0471	0	C1203	88.89	C1203	0.0077
High	AQYDQASTKY	2	1	1	P49454		0	1.42632e+06	0	2.994e-07	3.88752	2	1174.54	-0.0938119	37.5881	0	C1203	40	B1503	0.0059
High	GKVFATTGY	4	2	2	Q14957;O15399		0	2.61161e+06	0	0.0002292	3.88556	2	943.488	-0.324956	49.1415	0	C1203	37.04	B1503	0.1564
High	IQKAVSEGY	15	1	1	P32320		0	9.40635e+06	0	1.088e-05	3.84916	2	994.52	-0.724351	36.5126	0	C1203	37.04	B1503	0.0187
High	VKVDELSLY	15	1	1	Q9BUR5		0	4.42829e+06	0	2.621e-05	3.84536	2	1065.58	-0.803872	69.7847	0	C1203	44.44	B1503	0.085
High	TTYEGIFKTL	15	1	1	Q8WWM7		0	2.2959e+06	0	7.889e-06	3.82821	2	1172.62	-0.418726	78.0136	0	C1203	54.29	A6802	0.1132
High	KLFGSTSSF	32	1	1	P08174		0	2.36403e+07	0	0.0001251	3.81703	2	973.499	-0.263457	62.0304	0	C1203	37.04	B1503	0.0127
High	AKLPFTPLSY	11	1	1	Q9UM00		0	1.91992e+06	0	0.0004762	3.80333	2	1136.63	-0.433048	80.5912	0	C1203	48.57	B1503	0.0699
High	AKVSGGPSL	14	1	1	Q9Y262		0	4.79507e+06	0	1.198e-05	3.79338	2	815.462	-0.356453	38.7879	0	C1203	44.44	B1503	0.1298
High	IKENPSSQY	15	1	1	O75496		0	5.38397e+06	0	1.879e-05	3.78657	2	1065.52	-0.893554	33.1811	0	C1203	37.04	B1503	0.2086
High	YASENVNKL	10	2	2	P62820;Q9H0U4		0	3.81772e+06	0	8.769e-05	3.77706	2	1037.53	-0.529081	41.6556	0	C1203	88.89	C1203	0.0115
High	FQFGSSTTNF	8	1	1	P49790		0	1.07258e+06	0	0.000255	3.77141	2	1135.5	-0.610265	77.93	0	C1203	45.71	B1503	0.0697
High	VKEGVSAAF	8	1	1	Q7L1Q6		0	3.82661e+06	0	3.917e-05	3.77104	2	907.489	0.178172	48.3538	0	C1203	37.04	B1503	0.08
High	VGVDFALKV	12	1	1	O14966		0	2.0793e+06	0	7.575e-05	3.75596	2	947.556	-0.540031	77.369	0	C1203	48.15	C1203	1.2819
High	SAVNIIRTF	14	1	1	P29728		0	3.3243e+06	0	3.18e-05	3.75367	2	1020.58	-0.393646	69.9563	0	C1203	77.78	C1203	0.0226
High	AKWNPTAGVAF	22	1	1	P19387		0	5.66805e+06	0	2.334e-06	3.74282	2	1161.6	-0.237002	70.6268	0		0	B1503	0.5535
High	AQNPANMSKY	6	2	2	P50502;Q8NFI4		0	2.02229e+06	0	6.475e-07	3.74118	2	1123.52	-0.908514	39.3823	0	C1203	34.29	B1503	0.0106
High	GKLHPSSSL	18	1	1	A5PLN9		0	3.65661e+06	0	0.0008945	3.74026	2	925.51	-0.474454	31.5774	0	C1203	37.04	B1503	0.7917
High	KKHSQFIGY	25	4	4	Q58FF7;Q58FG0;P07900;P08238		0	8.04003e+06	0	9.357e-05	3.73375	2	1107.59	-0.487147	37.1307	0	C1203	44.44	B1503	0.0501
High	YAIDNPLHY	11	1	1	A5YKK6		0	2.77544e+06	0	4.87e-06	3.69442	2	1105.53	-0.555437	68.6018	0	C1203	88.89	C1203	0.0069
High	ETADVIAKVAF	7	1	1	O43617		0	1.43773e+06	0	9.726e-05	3.69111	2	1163.63	0.36078	74.4856	0		0	A6802	1.3198
High	KKLSSPSNY	16	1	1	Q13325		0	3.33692e+06	0	2.042e-05	3.68128	2	1023.55	-0.991908	27.9408	0	C1203	44.44	B1503	0.0581
High	GKYGTLQEF	25	1	1	O75182		0	1.54312e+07	0	0.001054	3.68081	2	1042.52	-1.39355	57.4953	0	C1203	40.74	B1503	0.0148
High	FIYDSVKVY	14	1	1	Q00325		0	2.55446e+06	0	1.445e-06	3.67671	2	1133.59	0.0483892	71.946	0	C1203	59.26	C1203	0.0117
High	SKLSFSQVF	22	1	1	Q9UJX4		0	4.27573e+06	0	1.219e-05	3.67293	2	1042.56	-0.70349	73.8276	0	C1203	37.04	B1503	0.031
High	GKVGSQSSF	14	1	1	Q9BY84		0	3.11229e+06	0	0.001216	3.67086	2	896.447	-0.0101639	31.9276	0	C1203	33.33	B1503	0.0394
High	SKEDDVRQY	26	1	1	P62753		0	5.19653e+06	0	3.927e-06	3.67072	2	1139.53	-0.445041	28.4372	0	C1203	48.15	B1503	0.5897
High	FKFmPPPTY	85	1	1	Q9H3M7	M4(Oxidation)	0	1.3841e+07	0	2.726e-06	3.66968	2	1143.55	-0.433467	69.5227	0	C1203	51.85	B1503	0.0044
High	FSmYKPITY	5	1	1	Q68CL5	M3(Oxidation)	0	2.51359e+06	0	2.038e-05	3.66346	2	1165.56	-1.02522	59.4612	0	C1203	81.48	C1203	0.0087
High	GQYSTGKTTF	16	3	3	Q9H4M9;Q9NZN3;Q9H223		0	6.75379e+06	0	0.000114	3.66137	2	1089.52	-0.201628	41.2773	0	C1203	31.43	B1503	0.0118
High	TKFETEQAL	9	2	2	Q04695;P08727		0	4.41341e+06	0	0.0005444	3.66118	2	1066.54	-0.810365	48.9262	0	C1203	44.44	B1503	0.5272
High	HKFPDEDSY	51	1	1	Q6VY07		0	1.93674e+07	0	0.0004038	3.65357	2	1137.48	-0.512396	41.2439	0	C1203	48.15	B1503	0.1563
High	VSWTGKPVSY	5	1	1	Q8TEK3		0	1.5232e+06	0	1.786e-05	3.65037	2	1123.58	-0.305134	58.5473	0	C1203	65.71	B1503	1.3936
High	YQFTGIKKY	37	1	1	Q96IX5		0	4.57006e+07	0	1.344e-06	3.65006	2	1147.61	-1.25	50.6251	0	C1203	51.85	B1503	0.0015
High	GKIGTVmTF	10	1	1	P30046	M7(Oxidation)	0	3.88076e+06	0	0.0003658	3.6425	2	969.507	-0.381285	57.2516	0	C1203	40.74	B1503	0.013
High	IKADHVSTY	16	1	1	P20036		0	7.07458e+06	0	0.0007229	3.63969	2	1033.53	-0.131367	33.0861	0	C1203	51.85	B1503	0.0024
High	AAANAIRVY	9	1	1	Q9NRK6		0	4.79301e+06	0	1.672e-05	3.6303	2	948.526	-0.268622	49.1303	0	C1203	92.59	B1503	0.0849
High	VKLPSGEDY	28	1	1	Q9Y2Z0		0	1.75632e+07	0	0.0001766	3.62939	2	1007.5	-1.02905	52.1914	0	C1203	48.15	B1503	0.276
High	AKYESQTSF	14	1	1	Q9P0U4		0	5.51031e+06	0	6.245e-06	3.6248	2	1060.49	-1.07073	40.7675	0	C1203	40.74	B1503	0.0018
High	ETVTATATSQV	10	1	1	Q9H4A3		0	4.56038e+06	0	4.454e-06	3.61893	2	1107.55	-0.503459	48.9105	0		0	A6802	0.5902
High	SAAEEVKTY	3	1	1	Q5JRA6		0	4.36348e+06	0	0.0007079	3.61857	2	997.483	-0.684232	37.1377	0	C1203	92.59	C1203	0.1392
High	FVNDIFERI	209	14	14	P33778;P62807;P58876;Q93079;P06899;O60814;Q99880;Q99879;Q99877;P23527;Q16778;Q5QNW6;Q8N257;P57053		0	4.35904e+08	0	0.0001472	3.61201	2	1152.6	-0.897043	83.7684	0	C1203	37.04	A6802	0.0163
High	GKVGGLLAF	29	1	1	P28340		0	1.27858e+07	0	1.688e-05	3.60608	2	861.519	-0.196975	74.4247	0	C1203	37.04	B1503	0.0193
High	GKAFFLSSY	13	1	1	O75123		0	2.21936e+06	0	0.0007236	3.60314	2	1019.52	-0.649098	72.2275	0	C1203	40.74	B1503	0.1579
High	KQIESKTAF	20	1	1	P10599		0	8.23564e+06	0	0.0003265	3.60244	2	1051.58	-1.03203	32.4163	0	C1203	33.33	B1503	0.0018
High	GKVPQPAIL	19	1	1	P24928		0	6.51185e+06	0	0.0006506	3.60152	2	922.572	-0.277873	58.7733	0	C1203	48.15	B1503	0.6706
High	TKYLENQAF	15	1	1	Q99661		0	3.81054e+06	0	1.484e-05	3.59245	2	1113.56	-1.30521	54.5628	0	C1203	33.33	B1503	0.0182
High	GKLKQFDAY	21	1	1	Q9Y282		0	7.49471e+06	0	0.001045	3.58783	2	1069.57	-1.06153	43.859	0	C1203	37.04	B1503	0.2617
High	AKAPPPVFY	24	1	1	Q16643		0	4.90577e+06	0	0.0001332	3.5857	2	989.545	-0.249256	58.4351	0	C1203	59.26	B1503	0.0077
High	SAISSVRLY	13	1	1	P42285		0	5.27828e+06	0	2.25e-05	3.58267	2	995.551	-0.676143	62.4746	0	C1203	85.19	C1203	0.0858
High	AKVDLNSNGF	8	1	1	P13797		0	2.60428e+06	0	1.756e-05	3.58106	2	1064.54	-0.33868	53.4364	0	C1203	37.14	B1503	0.644
High	VKVIQQESY	21	1	1	P60228		0	1.80981e+07	0	0.0002938	3.57712	2	1093.59	-0.258529	45.5577	0	C1203	40.74	B1503	0.1997
High	SQIRQSTAY	17	1	1	O43150		0	7.52107e+06	0	0.000524	3.5702	2	1053.53	-1.01915	33.0526	0	C1203	37.04	B1503	0.0042
High	GQFGTINNF	18	1	1	Q14457		0	5.93342e+06	0	0.001384	3.56686	2	997.473	-0.498359	72.7762	0	C1203	40.74	B1503	0.0065
High	FGFPGERTY	44	1	1	Q9Y4K0		0	5.01886e+07	0	2.073e-06	3.5621	2	1073.5	-1.0782	64.5652	0	C1203	59.26	C1203	0.0252
High	AAADSIKIW	13	1	1	Q9UNX4		0	2.30723e+06	0	0.000288	3.56144	2	974.531	0.391083	68.743	0	C1203	55.56	C1203	1.5532
High	KQALSGFGY	4	1	1	O75340		0	1.71946e+06	0	7.186e-05	3.55357	2	970.499	-0.792974	56.8006	0	C1203	40.74	B1503	0.0251
High	AKYPHVEDY	35	1	1	P61289		0	1.27611e+07	0	4.62e-05	3.55288	2	1121.53	-0.371695	42.3238	0	C1203	55.56	B1503	0.0063
High	IKISNPTEF	20	1	1	Q9BXS6		0	9748521	0	1.182e-05	3.55248	2	1048.57	-1.00091	62.6947	0	C1203	40.74	B1503	0.0114
High	SKLQNNNVY	17	1	1	P63010		0	7.80046e+06	0	0.0003743	3.55108	2	1079.55	-0.678516	35.9523	0	C1203	40.74	B1503	0.0398
High	KKGPSGYGF	19	1	1	O14745		0	1.87392e+07	0	0.00161	3.53918	2	940.488	-0.947096	37.247	0	C1203	37.04	B1503	0.0927
High	SKASQFTGY	9	1	1	O94966		0	3.70429e+06	0	8.402e-05	3.53257	2	988.473	-0.395803	42.2142	0	C1203	44.44	B1503	0.0836
High	VQGIFVEKY	15	3	3	P62834;P61224;A6NIZ1		0	6.48886e+06	0	1.454e-05	3.5265	2	1082.59	-1.17469	63.487	0	C1203	44.44	B1503	0.2769
High	KHFGTILNY	32	2	2	Q13829;Q9H3F6		0	1.09633e+07	0	0.0003728	3.52572	2	1092.58	-0.908032	57.2312	0	C1203	51.85	B1503	0.0317
High	GKYIPKQSF	17	1	1	Q9P0I2		0	1.29512e+07	0	5.291e-05	3.5253	2	1067.59	-0.814254	42.0147	0	C1203	33.33	B1503	0.022
High	DTAEIIKTL	17	1	1	P82909		0	1.53331e+07	0	0.001874	3.52003	2	1003.57	-0.777783	70.5569	0	C1203	85.19	A6802	0.0243
High	IKYDPSIGIY	5	1	1	P62913		0	2.03571e+06	0	2.622e-06	3.51127	2	1168.62	-0.484436	69.5448	0	C1203	42.86	B1503	0.0478
High	TTFDHQNSENV	13	1	1	Q9Y2D8		0	6.96509e+06	0	0.000112	3.50979	2	1291.55	-0.37191	38.1189	0		0	A6802	0.3537
High	GKPPFEANTY	30	1	1	O14965		0	2.22014e+07	0	2.226e-05	3.50007	2	1123.54	-1.38891	51.099	0	C1203	31.43	B1503	0.921
High	KLFLTGESY	9	1	1	P10619		0	1.75862e+06	0	1.772e-06	3.49874	2	1057.56	-0.60287	65.3098	0	C1203	40.74	B1503	0.0361
High	GQYSTGKTSF	22	1	1	Q9NZN4		0	1.20767e+07	0	9.948e-06	3.49852	2	1075.51	-0.408012	40.5907	0	C1203	34.29	B1503	0.0117
High	KQVASSTGF	2	1	1	P11532		0	1.09516e+06	0	0.0007275	3.49756	2	924.478	-0.195983	35.5434	0	C1203	29.63	B1503	0.0054
High	LKSGGVNQY	11	1	1	Q15021		0	6.88411e+06	0	2.905e-05	3.4931	2	965.505	-0.429857	33.4186	0	C1203	48.15	B1503	0.0559
High	FSYAFPKAV	13	2	2	O60669;O15427		0	3.00603e+06	0	2.527e-05	3.4914	2	1029.54	-0.690454	71.649	0	C1203	81.48	C1203	0.0255
High	QQFLIQQQY	3	1	1	Q6Y7W6		0	1.93091e+06	0	2.691e-05	3.49021	2	1195.61	-0.492092	72.4187	0	C1203	40.74	B1503	0.0189
High	GKSSGPTSLF	12	1	1	Q00839		0	3.24222e+06	0	0.001269	3.47513	2	980.504	-0.968402	56.7744	0	C1203	34.29	B1503	0.5851
High	ILGPPGSVY	26	3	3	P51965;Q96LR5;Q969T4		0	9.89002e+06	0	0.0002527	3.47365	2	902.498	-0.354496	71.4484	0	C1203	48.15	B1503	0.0572
High	IGVDFALKV	2	2	2	Q13637;P57729		0	1.18866e+06	0	0.0002991	3.47296	2	961.571	-0.685107	81.1829	0	C1203	44.44	C1203	1.1246
High	KQPDNSPEY	35	1	1	Q9NX07		0	1.33864e+07	0	0.00041	3.47283	2	1077.48	-2.92007	29.6543	0	C1203	44.44	B1503	0.0567
High	VKFGGQLLSF	15	1	1	Q08945		0	986692	0	3.085e-05	3.47063	2	1095.62	0.145439	83.6126	0	C1203	51.43	B1503	0.1139
High	KSKDFVQVm	20	1	1	P78527	M9(Oxidation)	0	5.79752e+06	0	0.0003755	3.46542	2	1097.56	-1.0472	36.9003	0	C1203	70.37	C1203	0.0946
High	AQEDAQRLY	2	1	1	P20073		0	3.02872e+06	0	5.08e-05	3.46309	2	1093.53	-0.810693	41.2047	0	C1203	48.15	B1503	0.0418
High	VKNPDGGSY	23	1	1	Q15646		0	8.98586e+06	0	0.0002211	3.46264	2	936.442	-0.309902	30.331	0	C1203	48.15	B1503	0.0469
High	VTYNYPVHY	5	1	1	Q9NV96		0	4.61789e+06	0	3.438e-06	3.45673	2	1155.55	-1.16956	58.9418	0	C1203	81.48	C1203	0.0317
High	YKAAAGEDY	31	1	1	P23381		0	2.2397e+07	0	0.0001154	3.44889	2	987.441	-0.753121	34.7096	0	C1203	44.44	B1503	0.2533
High	NKYLTAEAF	15	1	1	Q16658		0	5.29821e+06	0	0.0003102	3.44819	2	1056.53	-1.39873	60.719	0	C1203	33.33	B1503	0.1519
High	SIAGIFKEV	9	1	1	Q9NQQ7		0	5.2694e+06	0	0.0005411	3.44765	2	963.55	-0.569417	75.1814	0	C1203	51.85	A6802	0.0436
High	VQFGANKSQY	8	1	1	Q7Z7E8		0	3.60084e+06	0	2.964e-06	3.44669	2	1141.56	-0.244585	44.613	0	C1203	40	B1503	0.0217
High	FTADFVRQL	15	1	1	Q96Q15		0	7.41075e+06	0	0.000657	3.44426	2	1096.58	-0.631822	74.8194	0	C1203	85.19	C1203	0.0142
High	TQmPDPKTF	81	1	1	Q9Y5V0	M3(Oxidation)	0	8.92223e+06	0	2.992e-05	3.44115	2	1080.5	-0.76949	43.2043	0	C1203	48.15	B1503	0.009
High	SAVDFIRTL	35	1	1	Q9UEE5		0	4.39613e+07	0	0.0004133	3.43991	2	1021.57	-0.822467	80.2733	0	C1203	88.89	C1203	0.0059
High	KAITFVTQY	20	1	1	Q9H0S4		0	8.23642e+06	0	3.801e-05	3.43573	2	1070.59	-0.836455	63.2087	0	C1203	77.78	C1203	0.0505
High	NVPEGLLATVTV	31	5	5	P54707;P05023;P50993;P13637;Q13733		0	4.62496e+06	0	1.629e-05	3.43225	2	1212.68	-0.278913	93.7454	0		0	A6802	0.9815
High	YAYDGKDYIAL	26	17	17	P01892;P30447;P05534;P10316;P01889;P30460;Q04826;P30479;P30480;P30486;P18464;P30490;P30498;Q31610;P30499;P04222;P17693		0	1.53773e+07	0	4.096e-07	3.42753	2	1291.62	-0.654059	71.9548	0		0	C1203	0.4676
High	DVSKIFQVV	22	1	1	Q5TF58		0	1.00652e+07	0	0.001132	3.42526	2	1034.59	-0.766903	82.9964	0	C1203	44.44	A6802	0.1308
High	EIFSRGPYSV	13	1	1	Q7LBC6		0	3.60559e+06	0	7.377e-06	3.42459	2	1154.58	-0.79147	64.9508	0	C1203	40	A6802	0.1114
High	YTSDLHFQV	15	1	1	Q1KMD3		0	8.32713e+06	0	3.345e-05	3.41854	2	1109.53	-0.485735	68.0468	0	C1203	77.78	A6802	0.0061
High	AQLHPLSGY	9	1	1	Q7L7V1		0	2.74029e+06	0	0.001251	3.41672	2	985.509	-0.745084	53.5824	0	C1203	40.74	B1503	0.0144
High	RQQPPSTTTF	25	1	1	A3KN83		0	1.04392e+07	0	1.885e-05	3.41466	2	1162.58	-0.647794	42.8018	0	C1203	37.14	B1503	0.0083
High	SNSDVIRQV	20	1	1	Q9Y5K5		0	8.17793e+07	0	0.001858	3.41027	2	1017.53	-1.07486	43.4006	0	C1203	51.85	A6802	1.2171
High	FASGLIHRV	72	1	1	Q8N6L1		0	1.69184e+08	0	0.0001878	3.39628	2	999.572	-1.64706	51.4525	0	C1203	88.89	A6802	0.0309
High	NTVDFFNQI	74	2	2	Q9H8S9;Q7L9L4		0	2.08211e+08	0	0.0005696	3.39457	2	1097.53	-0.842939	89.818	0	C1203	62.96	A6802	0.0064
High	YQADIERmY	17	1	1	O95573	M8(Oxidation)	0	5.36706e+06	0	3.329e-06	3.39432	2	1204.53	-0.3167	48.5157	0	C1203	51.85	B1503	0.0096
High	SGFSGVIRL	17	1	1	P11309		0	3.26077e+06	0	3.984e-05	3.39	2	935.531	-0.402043	73.563	0	C1203	51.85	C1203	0.15
High	NQIPFIIQY	20	1	1	P20592		0	4.34163e+06	0	3.399e-07	3.38816	2	1135.61	-0.0895974	95.9868	0	C1203	51.85	B1503	0.008
High	VKVPTTLAEY	5	2	2	P49427;Q712K3		0	952858	0	0.0002614	3.38226	2	1120.62	-1.60342	64.1952	0	C1203	34.29	B1503	0.232
High	DVVGITYDHV	2	1	1	Q5W111		0	1.48541e+06	0	7.352e-06	3.38196	2	1117.55	-0.46872	66.4949	0	C1203	28.57	A6802	0.1343
High	GKFTEGNITY	9	1	1	Q7Z2W4		0	2.5691e+06	0	0.001089	3.38153	2	1129.55	-0.57181	54.4663	0	C1203	37.14	B1503	0.0356
High	RLYFSQQTY	17	1	1	P33897		0	8.41516e+06	0	7.718e-06	3.38145	2	1205.59	-0.560238	59.1453	0	C1203	44.44	B1503	0.0148
High	YLADIFTKL	8	1	1	Q49AG3		0	1.34452e+06	0	8.502e-05	3.38075	2	1083.61	-0.398183	89.7119	0	C1203	48.15	C1203	0.0344
High	DTAEIFHSA	17	1	1	Q92538		0	3.09197e+07	0	0.0003402	3.37935	2	990.452	-0.612144	54.5381	0	C1203	37.04	A6802	0.0068
High	EVFDKTYQF	31	1	1	Q96EU6		0	2.45855e+07	0	2.95e-05	3.37636	2	1176.56	-0.124826	66.7194	0	C1203	37.04	A6802	0.1371
High	AQFPNGPQF	19	1	1	Q99595		0	1.93679e+07	0	0.000135	3.36999	2	1005.48	-0.275532	71.0823	0	C1203	44.44	B1503	0.0011
High	SQFGGGSQY	38	1	1	O15371		0	7.82344e+07	0	0.001428	3.36884	2	930.395	-0.745368	46.1126	0	C1203	44.44	B1503	0.0013
High	RLVQSPNSY	9	2	2	Q71UM5;P42677		0	3.602e+06	0	0.0003672	3.36706	2	1063.55	-0.539199	43.0933	0	C1203	40.74	B1503	0.0284
High	YAFPKAVSVF	32	1	1	O15427		0	2.14341e+07	0	2.547e-07	3.36466	2	1128.61	-0.683563	81.0126	0	C1203	77.14	C1203	0.059
High	EIFNLKFAQA	15	1	1	P78347		0	3.04798e+06	0	0.001444	3.35363	2	1180.64	0.115842	79.3882	0	C1203	8.57	A6802	1.561
High	KQTQIFTTY	19	2	2	P34931;P08107		0	5.49171e+06	0	0.0005763	3.35087	2	1129.59	-0.673702	56.1695	0	C1203	40.74	B1503	0.0027
High	YTKQPQNDYL	13	1	1	Q9H6R0		0	3.35549e+06	0	0.000284	3.35035	2	1269.61	-0.578295	46.7473	0	C1203	54.29	A6802	1.3599
High	GKLGFLASY	15	1	1	Q12772		0	4.14786e+06	0	0.0002299	3.34061	2	955.524	-0.845526	71.5631	0	C1203	40.74	B1503	0.0566
High	SQYGSQVGY	14	1	1	Q14147		0	6.27681e+06	0	0.001035	3.33948	2	988.438	1.17123	48.4703	0	C1203	48.15	B1503	0.0029
High	AAQEAVKLY	8	1	1	O60506		0	3.15922e+06	0	0.0002595	3.33749	2	992.54	-1.32869	50.9112	0	C1203	88.89	B1503	0.4966
High	SAYGSVKAY	62	2	2	P07355;A6NMY6		0	1.77434e+08	0	0.0002114	3.33559	2	945.467	-0.455452	41.9538	0	C1203	88.89	C1203	0.0083
High	AASALIRTL	12	1	1	Q13535		0	2.88565e+06	0	0.0003357	3.33469	2	915.562	-0.332094	61.7187	0	C1203	92.59	C1203	0.0771
High	KQTQTFTTY	15	3	3	P54652;P17066;P11142		0	7.82096e+06	0	0.0001233	3.33353	2	1117.55	-0.341593	44.0099	0	C1203	40.74	B1503	0.0027
High	GKLLIGTLY	10	1	1	Q15165		0	1.95946e+06	0	0.001516	3.33253	2	977.603	-0.517259	75.8919	0	C1203	37.04	B1503	0.2399
High	GKLGGQDSF	7	1	1	P14921		0	1.39523e+06	0	0.001414	3.33086	2	908.447	-0.424155	41.7876	0	C1203	33.33	B1503	0.1897
High	SKNVSGISF	10	1	1	P49792		0	3.49197e+06	0	0.0003841	3.3299	2	938.493	-0.935082	54.1217	0	C1203	33.33	B1503	0.015
High	GKSFTSNSY	9	2	2	Q8N988;Q96NG5		0	3.15905e+06	0	0.001171	3.32476	2	990.453	0.0242845	37.1578	0	C1203	40.74	B1503	0.1071
High	GKNLYTNEY	6	3	3	Q9HCP0;P78368;Q9Y6M4		0	3.9242e+06	0	0.000319	3.32334	2	1101.52	-0.0795332	44.0376	0	C1203	40.74	B1503	0.0801
High	YVADLVHSA	10	1	1	Q96S97		0	3.36718e+06	0	0.0001707	3.3221	2	974.493	-0.890276	53.4659	0	C1203	14.81	A6802	0.0116
High	KQFDAGTVNY	7	1	1	P52756		0	1.67264e+06	0	0.0009908	3.3215	2	1142.55	-1.64311	49.9956	0	C1203	42.86	B1503	0.0033
High	DTFVHVTDL	19	1	1	P62263		0	1.33321e+07	0	0.001722	3.3213	2	1046.52	-0.26665	73.1486	0	C1203	74.07	A6802	0.4268
High	HQQPPSQQY	39	1	1	Q15532		0	1.54704e+07	0	0.0002794	3.31617	2	1112.51	-0.943311	30.5114	0	C1203	44.44	B1503	0.0037
High	EAAGImENI	41	1	1	O60341	M6(Oxidation)	0	5.74612e+06	0	0.0006846	3.31606	2	963.444	-1.07517	55.2368	0	C1203	74.07	A6802	0.0187
High	DVSNPQTVGV	21	1	1	O60493		0	3.57572e+07	0	0.001639	3.31447	2	1015.5	-2.43523	54.2315	0	C1203	28.57	A6802	0.1238
High	LSAPIHTQm	35	1	1	Q8NG31	M9(Oxidation)	0	1.03478e+07	0	0.001116	3.31276	2	1013.51	-0.738299	47.4089	0	C1203	70.37	C1203	0.0508
High	IATSQNRIY	10	1	1	Q99623		0	3.42055e+06	0	0.000148	3.31168	2	1065.57	-0.905318	42.5741	0	C1203	81.48	B1503	1.1557
High	SKYEALQTF	13	2	2	O15525;O60675		0	4.17795e+06	0	0.0001377	3.30982	2	1086.55	-0.405987	58.826	0	C1203	40.74	B1503	0.0033
High	GKYFEPEAY	9	1	1	Q96NE9		0	4.36751e+06	0	0.0001537	3.30543	2	1103.5	-0.432668	56.8212	0	C1203	44.44	B1503	0.0289
High	GQFLVKSGY	19	1	1	Q9NZI8		0	9.29521e+06	0	2.669e-05	3.30418	2	998.529	-1.18754	54.7824	0	C1203	40.74	B1503	0.0481
High	TVAQIKATV	20	1	1	Q8IXM2		0	8.03213e+06	0	0.0007384	3.30375	2	930.562	-0.420498	47.7483	0	C1203	44.44	A6802	0.0147
High	GQYNKEDPTSF	15	1	1	Q15437		0	4.47685e+06	0	1.836e-05	3.30298	2	1285.57	-0.328185	46.9886	0		0	B1503	0.1347
High	EVYAGNFVEV	16	1	1	Q9UBS4		0	4.10307e+06	0	1.049e-05	3.30246	2	1126.54	-0.442129	78.9631	0	C1203	31.43	A6802	0.0196
High	TTTEITHHGT	74	1	1	P15924		0	3.78273e+07	0	3.85e-05	3.30035	2	1097.52	-0.387405	22.7858	0	C1203	20	A6802	1.9445
High	DVDVSLPKV	9	1	1	Q09666		0	2.51092e+06	0	0.001314	3.29795	2	971.54	-0.399806	70.9618	0	C1203	37.04	A6802	0.6227
High	GQKPGGSDF	44	2	2	P56211;O43768		0	1.67414e+08	0	0.0008404	3.29232	2	892.414	-2.15397	30.7375	0	C1203	37.04	B1503	0.014
High	FSNDIPHVV	21	1	1	Q8NI36		0	1.11532e+07	0	3.754e-05	3.28798	2	1027.52	-1.15078	63.3839	0	C1203	81.48	A6802	0.0344
High	SAYDNVNKV	14	1	1	P28482		0	5.94141e+06	0	0.0003581	3.28646	2	1009.49	-1.15932	40.1271	0	C1203	85.19	C1203	0.0091
High	DTFFRPLNV	16	1	1	Q13444		0	1.43623e+07	0	0.0005436	3.27893	2	1108.58	-0.624983	81.3531	0	C1203	77.78	A6802	0.0509
High	EVAGILEPVGL	27	1	1	O95229		0	1.17953e+07	0	3.76e-05	3.27728	2	1096.62	-0.664032	94.583	0		0	A6802	0.3333
High	NVAEVTQSEI	13	2	2	Q9NVD7;Q9HBI1		0	3.78677e+06	0	0.000553	3.27717	2	1089.54	0.889537	59.1005	0	C1203	14.29	A6802	0.0973
High	YQKQPKIGY	4	1	1	Q68E01		0	4.1028e+06	0	9.158e-06	3.27688	2	1124.61	-0.416768	38.0461	0	C1203	44.44	B1503	0.0059
High	TKISTHVSF	15	1	1	Q8TEY7		0	5.48956e+06	0	0.0001228	3.27418	2	1019.55	-0.839821	47.378	0	C1203	37.04	B1503	0.0192
High	YmIDPSGVSY	58	1	1	P25788	M2(Oxidation)	0	1.00849e+07	0	1.953e-06	3.27386	2	1147.5	-0.238997	71.149	0	C1203	48.57	B1503	0.0334
High	DVATITKTV	12	1	1	P57740		0	3.72626e+06	0	0.001014	3.27383	2	947.54	-0.721451	53.3481	0	C1203	48.15	A6802	0.0298
High	TVFNFQEKV	11	1	1	Q14204		0	5.38396e+06	0	2.873e-05	3.26387	2	1111.58	-0.427242	67.3654	0	C1203	40.74	A6802	0.0273
High	NVVDVFHAV	19	1	1	Q15262		0	9.33922e+06	0	7.665e-05	3.26222	2	999.526	-0.23008	73.5456	0	C1203	40.74	A6802	0.0022
High	AKVANASYY	18	1	1	O15042		0	6.72469e+06	0	0.0003395	3.2581	2	986.493	-0.807439	39.1908	0	C1203	40.74	B1503	0.0678
High	GQYSPPPYSEY	24	1	1	Q96BY9		0	1.08496e+07	0	7.284e-08	3.25784	2	1287.55	0.0642646	63.6669	0		0	B1503	0.0875
High	NAANIFERL	15	2	2	Q9Y6D6;Q9Y6D5		0	2.59271e+06	0	0.0002663	3.2549	2	1047.56	-0.0651348	72.728	0	C1203	77.78	A6802	0.1099
High	QKIDVQESF	18	1	1	O95602		0	7.11053e+06	0	0.001085	3.24798	2	1093.55	-1.15792	55.052	0	C1203	33.33	B1503	0.0609
High	HSVYIPNKV	16	1	1	Q8TB22		0	3.70564e+06	0	0.001417	3.24311	2	1056.58	-0.823437	45.9339	0	C1203	70.37	A6802	0.094
High	AQTDPTTGY	9	1	1	Q9Y4K0		0	2.82957e+06	0	0.001739	3.23958	2	953.42	-1.11262	40.3484	0	C1203	44.44	B1503	0.0073
High	STSDLYNFQV	20	1	1	P10914		0	1.07226e+07	0	6.446e-06	3.2395	2	1173.54	-1.02943	81.1136	0	C1203	45.71	A6802	0.1604
High	SAFDHFASV	14	1	1	Q9Y547		0	5.16153e+06	0	0.0007013	3.23923	2	980.447	0.239716	65.295	0	C1203	81.48	C1203	0.0055
High	RSTKTGTAY	24	1	1	P17844		0	2.38557e+07	0	0.0005968	3.2392	2	984.51	-0.433403	18.7825	0	C1203	66.67	B1503	0.2802
High	LQRLENTQY	10	1	1	Q96D70		0	3.26608e+06	0	0.00019	3.2372	2	1164.6	-0.345101	45.3049	0	C1203	37.04	B1503	0.0108
High	SAYEIIRDY	11	1	1	O60287		0	1.71834e+06	0	0.001466	3.23224	2	1129.55	-0.887166	65.0433	0	C1203	88.89	C1203	0.0162
High	TAAQVARVL	10	1	1	A5YKK6		0	3.71605e+06	0	0.0009778	3.23097	2	928.556	-1.25925	51.2204	0	C1203	85.19	C1203	0.1716
High	EVAQAGKAV	22	1	1	Q9UPN9		0	1.38184e+07	0	0.0005263	3.22898	2	872.484	-0.0368583	27.4928	0	C1203	44.44	A6802	0.1409
High	FKNIQPSSF	8	1	1	Q9BVQ7		0	2.51875e+06	0	0.001508	3.22633	2	1067.55	-0.0110047	58.3551	0	C1203	37.04	B1503	0.027
High	YQSDPSGNY	2	1	1	P25789		0	7.50995e+06	0	0.0005599	3.22269	2	1030.41	-0.65143	38.9095	0	C1203	48.15	B1503	0.0126
High	AQHLTVSGF	10	1	1	Q96GX5		0	3.209e+06	0	0.0002924	3.22155	2	959.494	-1.0041	56.9145	0	C1203	37.04	B1503	0.0138
High	SKINPNTAY	10	2	2	Q6IN85;Q5MIZ7		0	4.41581e+06	0	0.0004284	3.22022	2	1007.52	-0.231105	38.1701	0	C1203	37.04	B1503	0.0068
High	ETFPANIQVV	22	1	1	Q5VYK3		0	5.99707e+06	0	0.0009717	3.21623	2	1117.59	-0.598553	82.6209	0	C1203	60	A6802	0.0208
High	NAYDFImKL	6	1	1	P08183	M7(Oxidation)	0	1.02275e+06	0	9.969e-05	3.21347	2	1130.56	0.211533	79.8696	0	C1203	85.19	C1203	0.0092
High	GKNPDEVSY	21	1	1	O95391		0	1.99649e+07	0	0.001672	3.21312	2	1008.46	-0.844213	36.6041	0	C1203	48.15	B1503	0.077
High	AAKDPSPSV	15	1	1	O75153		0	3.86351e+06	0	0.001495	3.21209	2	871.452	-0.0796422	30.6942	0	C1203	81.48	C1203	0.2231
High	RAYQQSEAY	57	1	1	Q9P0W2		0	4.60839e+07	0	4.374e-05	3.20546	2	1115.51	-0.644945	34.2691	0	C1203	77.78	B1503	0.024
High	HAAGVLLHV	12	1	1	Q6UX98		0	3.35652e+06	0	0.00031	3.20439	2	916.535	-1.91788	51.717	0	C1203	85.19	A6802	0.0153
High	DVYDKVDYL	14	1	1	Q14254		0	7.61578e+06	0	0.0001936	3.20435	2	1129.54	-1.10373	68.9356	0	C1203	48.15	A6802	0.0235
High	AQAASQHVF	11	1	1	Q9NQT4		0	7.4086e+06	0	0.001356	3.20423	2	958.473	-0.799255	39.5625	0	C1203	40.74	B1503	0.0041
High	EVSFVIHNL	15	2	2	P49903;Q99611		0	2.38636e+07	0	6.703e-05	3.20219	2	1057.57	-1.41986	75.3555	0	C1203	44.44	A6802	0.0164
High	SVYEGGVFFL	14	3	3	P51965;Q96LR5;Q969T4		0	1.52988e+06	0	1.443e-05	3.20175	2	1117.56	-0.142532	102.23	0	C1203	37.14	A6802	0.1933
High	AQKIGIVGF	3	1	1	Q96DG6		0	1.27971e+06	0	0.001073	3.19642	2	932.556	-0.378988	70.366	0	C1203	40.74	B1503	0.0094
High	AQSSLQEVY	11	1	1	P28066		0	4.96206e+06	0	0.001619	3.19421	2	1024.49	-0.631743	56.1799	0	C1203	51.85	B1503	0.0143
High	QQFPAFNSY	20	1	1	Q8N5U6		0	4.38313e+06	0	0.001858	3.19407	2	1101.5	-0.18869	76.4548	0	C1203	48.15	B1503	0.0013
High	LAKAWPTVL	8	1	1	P31040		0	2.92653e+06	0	0.001068	3.18987	2	998.603	-0.123424	73.8054	0	C1203	81.48	C1203	0.0648
High	SKLPSSIEY	10	1	1	Q15386		0	6.50166e+06	0	0.001526	3.18647	2	1023.53	-0.75385	55.6734	0	C1203	51.85	B1503	0.0129
High	ETIGTGGFAKV	25	1	1	Q14680		0	4.21071e+07	0	0.0001703	3.18433	2	1079.57	-1.05803	58.2901	0		0	A6802	0.2563
High	GQRKPATSY	119	1	1	P46779		0	1.63243e+08	0	0.001476	3.17919	2	1007.53	-0.725196	20.9714	0	C1203	37.04	B1503	0.0046
High	AAFLKAIGY	20	1	1	O75533		0	1.36996e+07	0	1.526e-05	3.17742	2	953.545	-0.514702	72.5142	0	C1203	85.19	C1203	0.1556
High	SVITQVFHV	24	1	1	Q00341		0	1.16155e+07	0	0.00148	3.17541	2	1029.57	-0.582909	80.5654	0	C1203	40.74	A6802	0.03
High	SKSPASSSL	18	1	1	Q9HBL0		0	4.70087e+06	0	0.0008371	3.17497	2	863.447	0.0297793	29.1952	0	C1203	48.15	B1503	0.3305
High	DSFYVHHDI	9	1	1	Q13610		0	3.40553e+06	0	0.0004788	3.17425	2	1132.5	-2.1879	51.3538	0	C1203	62.96	A6802	0.629
High	VQKPDAANY	13	1	1	Q9NQW6		0	4.44941e+06	0	0.001474	3.17338	2	1005.5	-0.459456	36.2022	0	C1203	48.15	B1503	0.0102
High	NTATIFHEL	35	1	1	Q9UHD2		0	8.67126e+07	0	0.001669	3.17331	2	1045.53	-1.07346	67.9794	0	C1203	74.07	A6802	0.0071
High	YKASSGLLY	9	1	1	Q08945		0	3.94038e+06	0	0.001375	3.17275	2	1001.53	-0.773573	56.0678	0	C1203	51.85	B1503	0.0233
High	RQQQSQTAY	33	2	2	Q99613;B5ME19		0	9.25401e+06	0	0.0008825	3.16812	2	1109.53	-0.712848	22.5618	0	C1203	37.04	B1503	0.0031
High	GKIQFGYVY	14	1	1	Q969M3		0	7.65439e+06	0	0.001894	3.16743	2	1074.56	-1.42474	68.5528	0	C1203	40.74	B1503	0.035
High	YAFAHILTV	8	1	1	O75204		0	3.15033e+06	0	0.0003268	3.16361	2	1034.57	-0.146187	81.3163	0	C1203	92.59	C1203	0.0029
High	GQFPFPTAL	7	1	1	Q765P7		0	1.17798e+06	0	0.000309	3.16297	2	977.508	-0.936044	95.7563	0	C1203	51.85	B1503	0.0106
High	VKTGTITTF	27	1	1	P13639		0	7.99651e+07	0	0.001664	3.16236	2	967.545	-1.16267	53.0912	0	C1203	44.44	B1503	0.0132
High	GKADGQQSSF	11	1	1	Q12772		0	1.88648e+06	0	0.000717	3.16178	2	1024.47	-0.290385	27.9604	0	C1203	42.86	B1503	0.4021
High	KTPDFILQV	6	1	1	Q9Y2V0		0	8.30764e+06	0	0.0003969	3.16131	2	1060.6	-0.886758	78.4805	0	C1203	77.78	A6802	0.1542
High	ETLFPSKIGV	25	2	2	Q9H8S9;Q7L9L4		0	1.99307e+07	0	3.138e-05	3.15996	2	1090.61	-0.592547	74.7137	0	C1203	45.71	A6802	0.0371
High	EVFRIGNVEI	10	1	1	P15927		0	2.11564e+06	0	4.363e-05	3.15893	2	1175.64	-0.161672	85.1595	0	C1203	20	A6802	0.2481
High	GQAPPGKAL	43	1	1	A8MPP1		0	4.01237e+07	0	0.001567	3.15887	2	838.478	-0.126846	33.2377	0	C1203	51.85	B1503	0.0584
High	FTITPPTAQVV	14	1	1	P52907		0	1.32677e+06	0	1.024e-05	3.15692	2	1173.65	-0.655166	83.9466	0		0	A6802	0.828
High	LQHPNIVGY	15	1	1	Q9BQI3		0	6.16745e+06	0	7.648e-05	3.15592	2	1040.55	-1.0227	56.8467	0	C1203	51.85	B1503	0.0036
High	TTVEIFNKL	52	1	1	Q96QK1		0	1.1051e+08	0	0.0007862	3.15559	2	1064.6	0.457818	72.7234	0	C1203	70.37	A6802	0.0152
High	AAATSVHVV	16	1	1	Q68EM7		0	9.24747e+06	0	0.00167	3.14848	2	854.473	-0.0845848	41.1511	0	C1203	88.89	C1203	0.3109
High	AASSIQRVL	15	2	2	Q5BKT4;Q5I7T1		0	6.22769e+06	0	0.00112	3.14782	2	944.551	-1.34167	51.1059	0	C1203	92.59	C1203	0.2688
High	GKSSVIQVF	19	1	1	Q8WVC6		0	7.07365e+06	0	0.001776	3.14507	2	964.546	-0.632878	63.6696	0	C1203	44.44	B1503	0.0291
High	AAYGYGIRY	29	3	3	P11216;P06737;P11217		0	1.87749e+07	0	9.091e-05	3.14095	2	1033.51	-0.346466	57.7102	0	C1203	88.89	C1203	0.0164
High	SSSGIVYKV	17	1	1	Q9P2E3		0	9.5339e+06	0	0.0009691	3.13984	2	939.512	-2.43279	49.8069	0	C1203	77.78	A6802	0.0342
High	GKSLTTSQY	2	1	1	Q9NZB2		0	2.35703e+06	0	0.0005395	3.13971	2	984.499	-0.547719	35.7153	0	C1203	40.74	B1503	0.1605
High	HVVDFFNRV	30	1	1	Q96BX8		0	9.87929e+06	0	3.177e-05	3.13809	2	1132.59	-0.611319	65.5609	0	C1203	40.74	A6802	0.0068
High	NAFSGVmmL	112	1	1	Q9NTX5	M7(Oxidation); M8(Oxidation)	0	9.25136e+06	0	0.0003717	3.1304	2	1001.44	-0.151354	70.1966	0	C1203	85.19	C1203	0.0302
High	AVANIVNSV	16	1	1	Q9BRQ8		0	6.24192e+06	0	0.001833	3.12948	2	886.499	-0.190895	65.7367	0	C1203	48.15	A6802	0.0195
High	FKFGDQGGF	14	1	1	P49790		0	4.01158e+06	0	0.0006623	3.12782	2	1002.47	-1.10307	66.4052	0	C1203	40.74	B1503	0.2126
High	RTAPSGSEY	12	1	1	O43660		0	1.1188e+06	0	5.024e-05	3.12738	2	967.448	-0.248934	27.4434	0	C1203	81.48	C1203	0.0863
High	VKGVSLSSY	11	1	1	Q9Y3B1		0	3.58919e+06	0	0.0005945	3.12354	2	939.513	-1.45832	51.9397	0	C1203	40.74	B1503	0.2068
High	STSDIITRI	24	2	2	P49585;Q9Y5K3		0	2.64432e+08	0	0.0007883	3.12182	2	1005.56	-1.15185	61.9001	0	C1203	70.37	A6802	0.0093
High	KKIDASQTEF	3	1	1	O94979		0	2.40998e+06	0	0.0003875	3.12176	2	1166.61	0.139703	38.1639	0	C1203	34.29	B1503	0.0351
High	GQTTTYLTY	20	1	1	P11388		0	9.54566e+06	0	0.001142	3.11825	2	1047.5	-0.471986	64.1816	0	C1203	44.44	B1503	0.0257
High	SSQFGGGSQY	8	1	1	O15371		0	2.36086e+06	0	0.0001884	3.10814	2	1017.43	-0.488412	46.2493	0	C1203	60	B1503	0.0122
High	STFIGEHYV	25	1	1	P08581		0	1.41015e+07	0	0.0002712	3.10637	2	1052.5	-1.34708	61.871	0	C1203	70.37	A6802	0.0172
High	KASGTLREY	53	1	1	Q02543		0	5.82634e+07	0	0.0007189	3.105	2	1024.54	-0.177166	28.3192	0	C1203	88.89	C1203	0.2953
High	EIVQFFQGL	8	1	1	P31942		0	563063	0	0.0002644	3.10234	2	1080.57	-0.259258	101.236	0	C1203	37.04	A6802	0.2097
High	YQSPVRVY	14	2	2	Q92503;O43304		0	6.5194e+06	0	0.0008768	3.10163	2	1011.52	-0.982109	54.0345	0	C1203	43.33	B1503	0.0188
High	AQGPTPRYF	73	1	1	O60427		0	3.579e+08	0	0.001297	3.10087	2	1036.52	0.307378	52.513	0	C1203	48.15	B1503	0.0108
High	EIANILQEL	7	1	1	Q49AM1		0	779955	0	0.001263	3.0992	2	1042.58	-0.256079	98.7091	0	C1203	44.44	A6802	0.0291
High	LLYESPERY	21	1	1	Q03518		0	7.86511e+06	0	4.555e-06	3.09594	2	1169.58	-0.586439	57.547	0	C1203	48.15	B1503	0.1254
High	NVIDNPWGV	14	1	1	Q5TGY1		0	2.28937e+06	0	0.0007464	3.09367	2	1013.5	-0.67012	84.1666	0	C1203	44.44	A6802	0.0058
High	EVFPTAGAGTDL	4	1	1	P28331		0	1.51819e+06	0	2.793e-05	3.09238	2	1177.57	-0.376693	75.6175	0		0	A6802	1.9093
High	AKQDVVLNY	15	1	1	Q15029		0	7.28456e+06	0	0.0004087	3.08618	2	1049.56	-0.651751	52.9106	0	C1203	51.85	B1503	0.0235
High	EQYESFVKF	13	1	1	Q9H9L7		0	3.79336e+06	0	0.0009632	3.08613	2	1176.56	-0.954844	72.8197	0	C1203	40.74	B1503	0.0121
High	AKVKFEERY	18	1	1	P61353		0	4.22985e+06	0	5.192e-05	3.08563	2	1169.63	-0.614268	35.8118	0	C1203	40.74	B1503	0.2739
High	TNSSVIVRV	15	1	1	Q8NI29		0	5.11434e+06	0	0.0005904	3.08308	2	974.561	-1.55181	51.9191	0	C1203	51.85	A6802	0.6352
High	GKPVQGVAY	9	2	2	P0C0L4;P0C0L5		0	4.04716e+06	0	0.0008793	3.08172	2	918.504	-0.598279	40.0737	0	C1203	40.74	B1503	0.4468
High	RQEGVPRTF	46	1	1	Q00403		0	6.01311e+07	0	0.0003512	3.07689	2	1089.58	-1.58468	41.0295	0	C1203	44.44	B1503	0.0078
High	AKYPEIKSL	42	1	1	O15121		0	2.70098e+07	0	0.001806	3.07689	2	1048.6	-1.35302	50.7057	0	C1203	59.26	B1503	0.0541
High	RQLPGSQRY	13	1	1	Q96BD0		0	2.96943e+06	0	0.0002472	3.07561	2	1104.59	-0.582787	33.2321	0	C1203	44.44	B1503	0.0018
High	KGSSAVRVY	28	1	1	P10914		0	1.45802e+07	0	5.59e-05	3.0755	2	966.535	-1.65383	30.1934	0	C1203	55.56	B1503	0.7561
High	GKFGGDFLVY	30	1	1	Q9BSV6		0	2.13158e+07	0	0.0003521	3.07402	2	1102.56	-0.784992	78.3992	0	C1203	54.29	B1503	0.1223
High	SKFPTQISL	16	1	1	O15164		0	1.1217e+07	0	0.001482	3.07369	2	1020.57	-0.324506	69.079	0	C1203	51.85	B1503	0.061
High	EAAAVFKTL	24	1	1	Q8IWZ6		0	1.48874e+07	0	0.0003033	3.07254	2	949.535	-0.551493	62.8822	0	C1203	85.19	A6802	0.1297
High	LSAGATRVY	4	2	2	P60891;P21108		0	1.18579e+06	0	0.0005672	3.07069	2	937.51	-0.207967	44.2051	0	C1203	81.48	C1203	0.2943
High	YSFGHPSSV	19	1	1	P31327		0	1.48355e+07	0	0.0001812	3.06646	2	980.446	-1.10944	50.6304	0	C1203	81.48	C1203	0.0052
High	SVADVVRFI	17	1	1	Q9UHJ3		0	1.652e+06	0	8.497e-05	3.06533	2	1005.57	-0.556013	83.4033	0	C1203	44.44	A6802	0.0166
High	YVTDVLYRV	9	1	1	Q96Q15		0	1.06732e+07	0	0.0002913	3.06284	2	1127.61	0.201763	73.2985	0	C1203	44.44	A6802	0.008
High	AAATRTTSF	6	1	1	Q9H3F6		0	1.67561e+06	0	0.0009233	3.06246	2	925.473	-0.47118	33.7769	0	C1203	74.07	C1203	0.0347
High	NKAAAGSAY	9	1	1	Q9UJJ7		0	505773	0	0.0005524	3.06227	2	852.421	0.317856	21.915	0	C1203	40.74	B1503	0.151
High	FAFSGVLRA	22	1	1	Q92766		0	1.39284e+07	0	0.0001584	3.06094	2	967.535	-1.04447	75.487	0	C1203	55.56	C1203	0.208
High	KLYQSIIGY	16	1	1	Q9NSV4		0	6.70398e+06	0	0.001303	3.05739	2	1084.6	-1.06457	68.1373	0	C1203	48.15	B1503	0.0529
High	AKYLDEDTIY	2	1	1	P31153		0	2.4099e+06	0	0.0005134	3.05492	2	1230.59	-0.774489	61.3739	0	C1203	34.29	B1503	0.1641
High	EVSPVSFHQV	37	1	1	Q8N543		0	8.31049e+07	0	0.0002518	3.05421	2	1128.57	-0.13858	60.0222	0	C1203	25.71	A6802	0.0332
High	EVFQKVTEV	10	1	1	Q8IVJ1		0	2.81281e+06	0	0.0001947	3.05398	2	1078.58	-0.700241	56.8531	0	C1203	48.15	A6802	0.0097
High	NVAEINRQV	11	1	1	O43933		0	4.66257e+06	0	0.0003575	3.05096	2	1042.56	-0.720608	43.1308	0	C1203	48.15	A6802	0.0092
High	KQmEQISQF	41	2	2	P37802;Q9UI15	M3(Oxidation)	0	7.76811e+06	0	0.0005641	3.05005	2	1154.55	-0.857367	44.6159	0	C1203	37.04	B1503	0.0022
High	HVASVVNQSV	10	1	1	P15822		0	2.57675e+06	0	0.0007718	3.0431	2	1039.55	-0.913545	43.2873	0	C1203	28.57	A6802	0.0697
High	DVIDFTGHAL	14	2	2	P31150;P50395		0	1.57044e+06	0	0.0001306	3.03658	2	1087.54	-0.658371	77.8545	0	C1203	40	A6802	0.1132
High	TTFDKEFLL	19	1	1	O60306		0	4.09759e+06	0	0.0006618	3.03512	2	1113.58	-0.230104	79.9175	0	C1203	74.07	A6802	0.0214
High	HSAGYILGSVNV	6	1	1	Q13115		0	1.53796e+06	0	0.001664	3.03268	2	1216.63	-0.379658	70.5511	0		0	A6802	1.9894
High	YAYDGKDYLA	25	17	17	P17693;P01892;P30447;P05534;P10316;P01889;P30460;Q04826;P30479;P30480;P30486;P18464;P30490;P30498;Q31610;P30499;P04222		0	1.78628e+07	0	0.0003437	3.02524	2	1178.54	-0.644164	55.7778	0	C1203	45.71	A6802	0.4989
High	YKLLGGLAV	35	1	1	P23396		0	4.38039e+07	0	0.001097	3.02227	2	933.576	-0.775402	78.1813	0	C1203	44.44	B1503	0.9261
High	SVSPVVRVAV	33	1	1	P13639		0	2.43552e+08	0	0.001199	3.02154	2	1012.61	-2.6259	61.6595	0	C1203	25.71	A6802	0.1278
High	FAYPAIRYL	52	1	1	P51398		0	2.94826e+07	0	1.537e-05	3.02068	2	1113.61	-0.43204	81.6441	0	C1203	96.3	C1203	0.0012
High	ETFPANIQV	53	1	1	Q5VYK3		0	1.42301e+08	0	0.001751	3.01951	2	1018.52	-0.836951	77.9512	0	C1203	81.48	A6802	0.0025
High	GKAPGAEEY	32	1	1	P09543		0	3.129e+07	0	0.0008084	3.01624	2	921.431	-0.618211	30.1673	0	C1203	51.85	B1503	0.0978
High	RLYGPSSVSF	19	1	1	P50454		0	7.77869e+06	0	7.571e-05	3.0136	2	1112.57	-0.646964	65.0628	0	C1203	42.86	B1503	0.1323
High	QLVDIIEKV	15	1	1	P61289		0	9.09462e+06	0	0.0003853	3.01251	2	1056.63	-0.519738	78.6638	0	C1203	44.44	A6802	0.1489
High	TLADVLYHV	21	1	1	Q9UBL3		0	4.21617e+06	0	0.0001053	3.00924	2	1030.56	-0.701978	79.9487	0	C1203	44.44	A6802	0.0213
High	RAFGIPIRV	49	1	1	P06493		0	4.39758e+07	0	0.0003189	3.00873	2	1028.63	-1.44464	67.2212	0	C1203	88.89	C1203	0.0166
High	VAAPQVQQV	19	1	1	Q12772		0	1.23913e+07	0	0.0009956	3.00836	2	939.525	-0.504629	52.89	0	C1203	92.59	C1203	0.1209
High	SQFGTVTRF	12	1	1	Q9BYG3		0	1.45185e+08	0	0.001826	3.00661	2	1042.53	-0.231773	59.2093	0	C1203	40.74	B1503	0.0015
High	YLYGQTTTY	22	1	1	P11388		0	9.24228e+06	0	0.001145	3.0015	2	1109.51	-0.679167	61.7922	0	C1203	51.85	B1503	0.0076
High	EVAPSFGTLL	17	1	1	Q5SRE5		0	3.73645e+06	0	6.779e-05	2.99945	2	1033.56	-0.400005	92.5808	0	C1203	34.29	A6802	0.1054
High	AQFETKKLY	34	1	1	O60613		0	3.35214e+07	0	0.0008952	2.9983	2	1127.61	-0.456641	45.33	0	C1203	51.85	B1503	0.004
High	DVADVLLQA	15	2	2	Q8IWZ3;O75179		0	1.166e+06	0	0.00098	2.99825	2	943.509	-0.42338	87.5274	0	C1203	11.11	A6802	0.0316
High	VQFSNHTGY	6	1	1	O00764		0	1.4069e+06	0	0.0005688	2.9932	2	1052.48	-0.522381	44.6779	0	C1203	48.15	B1503	0.0031
High	ETIPSEIQVFV	17	1	1	Q15646		0	2.71177e+07	0	7.432e-05	2.98887	2	1261.67	1.0855	96.1389	0		0	A6802	0.339
High	YQTAPKAGY	7	1	1	Q96KR1		0	2.53094e+06	0	0.001145	2.98879	2	998.494	-0.675481	37.098	0	C1203	40.74	B1503	0.0139
High	GQIPQILYY	11	1	1	O75592		0	1.82261e+06	0	2.253e-05	2.9844	2	1094.59	-0.362892	88.8507	0	C1203	51.85	B1503	0.0067
High	YAFPLAHSL	6	1	1	Q13496		0	13893995	0	0.0004944	2.98427	2	1018.54	-0.39902	76.7844	0	C1203	88.89	C1203	0.0016
High	SQYPFPVTL	38	1	1	Q5R372		0	2.34513e+07	0	0.001222	2.98341	2	1051.55	-0.305716	93.3618	0	C1203	59.26	B1503	0.007
High	TAQTLVRIL	17	1	1	Q12905		0	4.06678e+06	0	0.0009121	2.98235	2	1014.63	-0.409719	70.5071	0	C1203	81.48	C1203	1.0533
High	DVAPLSLGL	1	3	3	P34931;P08107;P17066		0	192973	0	0.0004094	2.9774	2	884.509	0.235686	94.4397	0	C1203	51.85	A6802	0.0318
High	EVAALIRSL	28	1	1	Q6P2Q9		0	1.3799e+07	0	0.0002717	2.97727	2	971.588	-0.475552	74.7509	0	C1203	48.15	A6802	0.0378
High	EIFSKNYRV	7	1	1	Q9NVU0		0	5.90314e+06	0	0.001159	2.97618	2	1155.61	-1.22523	50.2092	0	C1203	44.44	A6802	0.0224
High	DASPVTNNTI	20	1	1	O15164		0	1.49228e+07	0	0.0002048	2.97317	2	1031.5	-0.480632	53.7105	0	C1203	45.71	A6802	1.0622
High	YAFPVSNNL	5	1	1	Q13614		0	1.17074e+06	0	0.0006786	2.96931	2	1024.51	-0.394615	78.5994	0	C1203	88.89	C1203	0.0024
High	TKDGVREVF	9	1	1	P61586		0	5.11818e+06	0	0.0003939	2.96779	2	1050.56	-0.912788	42.3237	0	C1203	37.04	B1503	0.5175
High	FAYGGWNYL	15	1	1	Q01650		0	2.79329e+06	0	0.0003379	2.96546	2	1090.5	-0.304754	94.1162	0	C1203	85.19	C1203	0.0035
High	AKFSLPVSL	15	1	1	Q12980		0	3.28075e+06	0	0.0009553	2.95981	2	961.571	-0.547759	81.8709	0	C1203	55.56	B1503	0.0876
High	NVIGEPFLNV	15	1	1	P33991		0	2.16444e+06	0	0.0002238	2.95918	2	1101.59	-0.352073	92.8894	0	C1203	28.57	A6802	0.0868
High	TVIAKVNNV	15	1	1	P26639		0	9.53723e+06	0	0.001061	2.95779	2	957.572	-0.76466	45.6922	0	C1203	40.74	A6802	0.0132
High	SSYDKPITF	10	1	1	Q86X10		0	4.22561e+06	0	0.0002678	2.95497	2	1057.52	-1.39857	59.8669	0	C1203	77.78	C1203	0.0042
High	YQSPHSGSF	17	1	1	P32004		0	6.49311e+06	0	4.912e-05	2.95434	2	1009.44	-0.338785	39.4171	0	C1203	44.44	B1503	0.0029
High	EVSPVSRQSI	15	1	1	Q9H6S3		0	1.12728e+07	0	0.0006571	2.95194	2	1101.59	-0.682989	46.0911	0	C1203	20	A6802	0.3148
High	FSFPGELLm	114	2	2	P43003;P48664	M9(Oxidation)	0	1.35356e+07	0	0.0008532	2.94645	2	1056.51	0.944564	96.1421	0	C1203	77.78	C1203	0.0263
High	AQRQDIAFAY	14	1	1	P07355		0	4.72905e+06	0	6.331e-05	2.93856	2	1182.59	-0.399142	60.4808	0	C1203	31.43	B1503	0.023
High	DVYSGTPTKV	20	1	1	Q14493		0	1.66894e+07	0	0.0003026	2.93731	2	1066.54	-0.800989	47.9693	0	C1203	40	A6802	0.151
High	YKILGGSVL	16	1	1	Q15843		0	4.42317e+06	0	0.0005678	2.9368	2	949.571	-0.287044	71.817	0	C1203	44.44	B1503	0.1272
High	KGYPSEFSTY	11	1	1	P49674		0	3.27269e+06	0	0.000103	2.93286	2	1178.54	-0.747742	56.0692	0	C1203	34.29	B1503	0.7928
High	mTSEIHNTV	129	1	1	O43264	M1(Oxidation)	0	4.46961e+07	0	0.001764	2.93026	2	1047.48	-1.03895	35.0148	0	C1203	77.78	A6802	0.0035
High	EVFNYIHNI	17	1	1	Q8N3P4		0	3.48428e+06	0	0.0007436	2.92974	2	1148.57	0.0197	73.5967	0	C1203	37.04	A6802	0.0055
High	LISGVVHEI	10	1	1	O43462		0	2.57885e+06	0	0.001692	2.92749	2	966.562	-0.215396	63.6231	0	C1203	44.44	A6802	0.1948
High	SQYPFPVTLY	18	1	1	Q5R372		0	1.462e+06	0	0.0001925	2.92488	2	1214.61	1.27125	96.266	0	C1203	34.29	B1503	0.0041
High	SSYLFIVKY	2	1	1	Q96QD8		0	1.48874e+06	0	3.329e-05	2.92433	2	1119.61	-0.585576	81.2171	0	C1203	77.78	C1203	0.3078
High	HTINGHNAEV	54	1	1	P22626		0	9.85879e+07	0	0.0009387	2.91895	2	1091.52	-1.23619	28.7531	0	C1203	45.71	A6802	0.0866
High	GKTTQLTQY	16	2	2	Q92620;Q14562		0	7.34655e+06	0	0.0004378	2.91366	2	1039.54	-1.01219	38.6826	0	C1203	37.04	B1503	0.4062
High	NLYGSPREY	27	1	1	Q9NZM1		0	3.12016e+07	0	0.001561	2.91278	2	1098.52	-0.611502	48.3253	0	C1203	55.56	B1503	0.1427
High	ETSGIGEARV	24	1	1	P61764		0	4.97661e+07	0	0.0001648	2.91154	2	1018.52	-0.495388	42.1518	0	C1203	42.86	A6802	0.0618
High	KAIATTVTY	10	1	1	O43808		0	1.12294e+07	0	0.0002154	2.91092	2	967.545	-0.773835	47.4576	0	C1203	81.48	B1503	0.0276
High	AAAATGRLL	8	1	1	Q06481		0	1.89211e+06	0	0.001639	2.90841	2	843.505	-0.270461	46.124	0	C1203	85.19	C1203	0.2447
High	GKFPSLLTH	18	1	1	P62906		0	1.08088e+08	0	0.001814	2.90487	2	999.561	-1.14905	57.3972	0	C1203	18.52	B1503	0.9746
High	EVIWLTQHV	6	1	1	Q9UJW0		0	1.35481e+06	0	0.0007905	2.90274	2	1124.61	0.216716	76.4324	0	C1203	37.04	A6802	0.0285
High	VAINHIVDF	17	1	1	P78346		0	6.53636e+06	0	0.001286	2.90179	2	1027.56	-0.807048	74.307	0	C1203	77.78	C1203	0.1101
High	NVDISAPKV	3	1	1	Q09666		0	1.26131e+06	0	0.0009675	2.89709	2	942.524	-1.12426	55.9385	0	C1203	37.04	A6802	0.7329
High	EIYNGKLFDL	11	1	1	Q99661		0	2.24461e+06	0	0.0003382	2.89681	2	1211.63	-0.342248	82.787	0	C1203	37.14	A6802	1.3597
High	AAFAYTVKY	40	1	1	Q8N2K1		0	4.77238e+07	0	0.0002187	2.89526	2	1033.53	-1.06819	63.0491	0	C1203	85.19	C1203	0.0287
High	LKSVNELIY	12	1	1	P18124		0	7.45355e+06	0	0.0003031	2.89516	2	1078.61	-0.806944	66.5203	0	C1203	44.44	B1503	0.4351
High	EIAQVVEKV	19	1	1	Q9BYK8		0	1.27223e+07	0	0.001862	2.88946	2	1014.58	-0.768144	56.1662	0	C1203	44.44	A6802	0.0187
High	GKTSLITRF	6	2	2	P20340;Q9NRW1		0	5.17504e+06	0	0.00135	2.88441	2	1022.6	-1.55136	51.0998	0	C1203	37.04	B1503	0.1631
High	YVTSILQSL	18	1	1	Q69YN4		0	2.65075e+06	0	0.0009389	2.88229	2	1023.57	-0.279763	93.0215	0	C1203	44.44	C1203	0.0597
High	GKLIIWDSY	3	3	3	P62873;P62879;Q9HAV0		0	1.13141e+06	0	7.656e-05	2.88127	2	1094.59	-0.492685	78.3902	0	C1203	37.04	B1503	1.0181
High	DIFRYQDEV	7	1	1	Q13283		0	1.97459e+06	0	0.0001522	2.87799	2	1184.56	-0.305914	69.2538	0	C1203	44.44	A6802	0.3132
High	FQYPDTRYL	5	1	1	Q9NY61		0	4.93384e+06	0	0.0003449	2.8753	2	1202.58	-0.540235	69.7294	0	C1203	55.56	C1203	0.0253
High	YKIDPSTL	15	1	1	O15294		0	5.671e+06	0	0.00132	2.8725	2	936.504	0.269672	59.871	0	C1203	43.33	B1503	1.6411
High	ETFKDFPQm	48	2	2	P15170;Q8IYD1	M9(Oxidation)	0	1.10336e+07	0	0.0007696	2.87151	2	1158.51	0.379266	59.739	0	C1203	62.96	A6802	0.2512
High	KKSDPVVSY	46	1	1	P13639		0	5.85235e+07	0	0.0009554	2.8635	2	1022.55	-0.634013	35.1252	0	C1203	51.85	B1503	0.0042
High	LQRATGISF	7	1	1	Q15393		0	1.83225e+06	0	0.00102	2.86282	2	992.552	0.0760645	57.1082	0	C1203	33.33	B1503	0.004
High	EAFHGKFYEA	33	1	1	Q13045		0	2.24937e+07	0	0.0001002	2.86259	2	1198.55	-0.211477	47.7922	0	C1203	42.86	A6802	0.6977
High	ITGPLIRIL	13	1	1	Q92616		0	1.99501e+06	0	0.0003478	2.85909	2	995.661	-0.664122	84.2759	0	C1203	81.48	C1203	0.7313
High	ETIIDTKGV	9	1	1	Q9GZS1		0	3.65769e+06	0	0.0003818	2.85868	2	975.535	-0.999142	52.8541	0	C1203	70.37	A6802	0.0365
High	TTVEDLGSKI	4	1	1	P35613		0	4.04983e+06	0	0.0009038	2.85745	2	1062.57	-1.13441	58.7322	0	C1203	31.43	A6802	0.5539
High	EVYPFGIVGm	40	1	1	O75534	M10(Oxidation)	0	2.60756e+06	0	0.0001054	2.84878	2	1127.54	-0.631169	88.9879	0	C1203	28.57	A6802	0.0891
High	DQAEIRSLV	20	2	2	P09913;O14879		0	9.47014e+06	0	0.001355	2.84764	2	1030.55	-1.55862	61.5716	0	C1203	44.44	A6802	0.5213
High	LVASVRVPA	23	1	1	P42126		0	2.39674e+07	0	0.001096	2.84752	2	911.566	-1.09649	55.2019	0	C1203	11.11	A6802	0.6912
High	TKQPSSTSY	4	1	1	Q9P2D6		0	691219	0	0.001721	2.84696	2	998.478	-0.490893	27.2571	0	C1203	44.44	B1503	0.0251
High	YGYRQSVTY	4	1	1	P08174		0	2.51869e+06	0	0.0002104	2.84652	2	1136.54	0.478607	48.4001	0	C1203	51.85	C1203	0.0393
High	AKIVPKISY	15	1	1	Q7Z417		0	1.24957e+07	0	0.001294	2.8453	2	1018.63	-1.03541	50.9097	0	C1203	44.44	B1503	0.013
High	ETYQFSGVYV	36	1	1	P61160		0	2.37738e+07	0	5.904e-05	2.83994	2	1192.55	-0.657557	81.4004	0	C1203	45.71	A6802	0.0448
High	EVFPLAmNYL	42	3	3	P24385;P30279;P30281	M7(Oxidation)	0	2.49975e+06	0	1.057e-05	2.83251	2	1212.6	-0.00401875	95.8988	0	C1203	40	A6802	0.0835
High	TTFEHAHNm	44	1	1	P13639	M9(Oxidation)	0	1.50419e+06	0	0.00181	2.83163	2	1103.46	-0.276749	25.3416	0	C1203	66.67	A6802	0.0346
High	QAFPLIIKL	11	1	1	Q14CZ7		0	1.62868e+06	0	0.0002808	2.82967	2	1042.67	-0.389729	93.0508	0	C1203	92.59	C1203	0.0287
High	GKSTSIQSF	19	1	1	P13797		0	1.42469e+07	0	0.001496	2.8282	2	954.488	-0.894182	42.7411	0	C1203	37.04	B1503	0.0291
High	QGFPNRVVF	32	1	1	P35579		0	4.61289e+07	0	0.001727	2.82702	2	1063.57	-0.903458	69.1505	0	C1203	48.15	C1203	0.1618
High	YVSEILEKV	2	1	1	P42704		0	2.77571e+06	0	0.0004404	2.82656	2	1079.6	-1.1558	68.8132	0	C1203	48.15	A6802	0.0089
High	GQNPFELAF	18	1	1	Q9HBH9		0	1.88457e+06	0	0.0001528	2.82389	2	1022.49	0.0870362	96.5399	0	C1203	40.74	B1503	0.006
High	YAFPKSITVF	15	1	1	P53985		0	3.15927e+06	0	3.893e-06	2.82243	2	1172.63	-0.83615	84.4201	0	C1203	77.14	C1203	0.0324
High	TTFESSHYLL	13	1	1	Q16531		0	4.52067e+06	0	0.001883	2.82226	2	1197.58	-0.603587	69.1161	0	C1203	54.29	A6802	0.0976
High	AQKPFGATY	20	1	1	Q96QD5		0	1.47298e+07	0	0.001087	2.82145	2	982.498	-0.845411	46.3432	0	C1203	51.85	B1503	0.0009
High	GKPGHLQFY	1	1	1	Q8IWA0		0	1.19446e+06	0	0.001824	2.82127	2	1046.54	-0.724364	47.4757	0	C1203	40.74	B1503	0.7703
High	DIANFQVLV	18	1	1	Q8IY34		0	3.02725e+06	0	0.0003169	2.8203	2	1018.56	-0.310421	97.6869	0	C1203	44.44	A6802	0.0341
High	IAFPTSISV	32	1	1	Q9UQ80		0	2.74275e+07	0	0.001273	2.81672	2	934.524	-0.576716	88.9352	0	C1203	88.89	C1203	0.0073
High	TTISKVSQV	13	1	1	Q9UNX4		0	5.86878e+06	0	0.0009942	2.81575	2	962.551	-0.863763	41.2548	0	C1203	74.07	A6802	0.0155
High	DVQIGDIVTV	12	1	1	P62280		0	756885	0	0.0007402	2.81566	2	1058.57	-0.296565	90.3494	0	C1203	28.57	A6802	0.1129
High	RKNPVTSTY	20	1	1	Q13131		0	1.32524e+07	0	0.001832	2.81519	2	1065.57	-1.13444	30.4568	0	C1203	48.15	B1503	0.0024
High	KAFDFPSSF	4	1	1	Q7L945		0	1.96852e+06	0	0.0017	2.81335	2	1045.5	-2.23977	77.0094	0	C1203	77.78	C1203	0.0036
High	RKFPAGKVPAF	1	1	1	P26641		0	2.6879e+06	0	0.0002416	2.80943	3	1217.71	-0.513216	50.1144	0		0	B1503	0.1649
High	STFEDVTQV	15	1	1	Q14247		0	5.84487e+06	0	0.0007555	2.80871	2	1025.48	-0.889896	66.2925	0	C1203	77.78	A6802	0.0077
High	RKLEAAEDIAY	18	1	1	P35232		0	1.54201e+07	0	0.00144	2.80223	2	1278.67	-2.79236	49.1615	0		0	B1503	0.652
High	ESFEKAYQV	20	1	1	Q86V86		0	1.54539e+07	0	0.001448	2.79975	2	1100.52	-0.975378	53.2021	0	C1203	74.07	A6802	0.0087
High	ETFNTPAmYV	176	7	7	Q9BYX7;P60709;P63261;Q6S8J3;A5A3E0;P0CG38;P0CG39	M8(Oxidation)	0	7.4954e+07	0	0.0005494	2.79697	2	1188.52	-0.495683	71.3403	0	C1203	48.57	A6802	0.0227
High	MKVLLAAAL	1	1	1	P23284		0	933293	0	0.001316	2.79643	2	929.585	-0.643233	78.9184	0	C1203	37.04	B1503	1.6567
High	FATPFLVVR	29	1	1	P15954		0	2.21111e+07	0	0.0007274	2.78374	2	1049.61	-0.55853	81.0229	0	C1203	55.56	C1203	3.519
High	RVFPYSVFY	68	1	1	O15118		0	1.15234e+07	0	0.0003041	2.7836	2	1177.6	-0.232621	84.7882	0	C1203	51.85	C1203	0.0153
High	YAFPKAVSV	35	1	1	O15427		0	9.49643e+07	0	0.000135	2.77411	2	981.54	-0.599853	66.1811	0	C1203	92.59	C1203	0.0015
High	AKFGSKEEY	3	1	1	Q5VWQ8		0	1.85037e+06	0	0.000199	2.77212	2	1058.51	-0.609594	30.963	0	C1203	51.85	B1503	0.0236
High	AmNPTNTVF	63	1	1	P11142	M2(Oxidation)	0	4.61193e+07	0	0.0008139	2.76672	2	1010.46	-0.762541	62.1549	0	C1203	44.44	B1503	0.0048
High	EVISGKQEGV	14	2	2	Q9Y227;Q9NQZ7		0	1.28964e+07	0	0.001783	2.7662	2	1045.55	-1.45414	38.0722	0	C1203	28.57	A6802	0.1576
High	SVYDGHGGEEV	16	1	1	O15355		0	9.87369e+06	0	5.702e-05	2.76558	2	1148.48	-0.514086	42.3045	0		0	A6802	0.6841
High	ISAPLVKTL	7	1	1	P30305		0	1.09793e+07	0	0.0004576	2.76369	2	941.603	-0.158732	66.0353	0	C1203	88.89	C1203	0.0362
High	FSKDIFSVI	26	1	1	Q01650		0	1.87001e+07	0	0.001708	2.76299	2	1055.58	-1.18037	85.6984	0	C1203	70.37	C1203	0.11
High	GQYPTQPTY	58	1	1	Q15038		0	2.71878e+08	0	0.001139	2.76237	2	1054.48	-0.883347	53.06	0	C1203	51.85	B1503	0.0016
High	KSGPTSYL	20	1	1	Q5T686		0	6.24925e+06	0	0.0006285	2.7621	2	852.446	-0.247347	47.1202	0	C1203	70	C1203	6.0005
High	EVFEKATFI	25	1	1	P19338		0	2.38509e+07	0	0.0006803	2.76073	2	1083.57	-1.08055	70.7433	0	C1203	37.04	A6802	0.0158
High	EVLDFITHL	18	1	1	Q13057		0	5.65672e+06	0	5.25e-05	2.75928	2	1086.58	-0.539527	94.2638	0	C1203	44.44	A6802	0.0081
High	RQFTSSSSI	8	1	1	Q04695		0	2.87463e+06	0	0.001169	2.75813	2	1012.51	-0.528074	40.193	0	C1203	33.33	B1503	0.0889
High	EVNSGIYRV	21	1	1	Q0VDF9		0	3.01647e+07	0	0.001892	2.75575	2	1036.54	-1.70609	50.6995	0	C1203	44.44	A6802	0.0069
High	SQGSFPEHY	16	1	1	Q9HBH0		0	6.48619e+06	0	0.0006044	2.75266	2	1051.45	-0.741974	46.3616	0	C1203	44.44	B1503	0.0672
High	SAMPTVRSF	27	1	1	Q03518		0	1.36526e+07	0	0.0004389	2.75148	2	995.497	-0.4492	58.6148	0	C1203	81.48	C1203	0.0052
High	FAISILQQL	15	2	2	Q14240;P60842		0	2.6996e+06	0	0.000561	2.74948	2	1032.61	-0.274251	102.37	0	C1203	81.48	C1203	0.0215
High	TVFDEAIRA	16	3	3	P63000;P15153;P60763		0	7.37039e+06	0	0.0003223	2.74241	2	1021.53	-0.939011	62.9356	0	C1203	11.11	A6802	0.0769
High	FTITPPTAQV	24	1	1	P52907		0	1.2378e+07	0	6.092e-05	2.73589	2	1074.58	-0.65915	78.4416	0	C1203	51.43	A6802	0.022
High	QVFEGHTHYV	44	1	1	P35606		0	2.9799e+07	0	0.001374	2.73494	2	1216.57	-0.451343	43.976	0	C1203	37.14	A6802	0.0215
High	REYEAQQQY	9	1	1	Q9NUQ8		0	1.45965e+06	0	0.0003824	2.73167	2	1214.54	-0.229502	35.2801	0	C1203	44.44	B1503	0.0052
High	ETFEKTPVEV	10	1	1	Q15149		0	4.89527e+06	0	0.001777	2.72927	2	1178.59	-0.794272	57.3693	0	C1203	57.14	A6802	0.0202
High	TAFPFQVEV	18	1	1	A6NHR9		0	6.4913e+06	0	0.000512	2.72914	2	1037.53	-0.540337	95.1711	0	C1203	92.59	A6802	0.0162
High	FLKPDDIQY	8	1	1	O75533		0	2.83178e+06	0	0.0003134	2.72541	2	1138.58	-0.76177	66.0891	0	C1203	51.85	B1503	0.1694
High	AKVVDKSEY	20	1	1	P42695		0	6.94598e+06	0	0.0005429	2.71793	2	1038.55	-0.434379	27.9352	0	C1203	44.44	B1503	0.1616
High	FAFDPSVNY	3	1	1	Q8IYM9		0	1.13346e+06	0	0.0001473	2.71234	2	1059.48	-0.368576	82.8472	0	C1203	88.89	C1203	0.0043
High	EIAGPGFINV	7	1	1	P54136		0	3.03853e+06	0	0.0008194	2.70784	2	1016.54	-0.176197	84.9541	0	C1203	31.43	A6802	0.0346
High	EVIPNSNFYV	16	1	1	Q9NTJ3		0	3.45034e+06	0	3.351e-06	2.70783	2	1181.58	-0.175703	81.8919	0	C1203	25.71	A6802	0.0231
High	TTIDVRTTF	15	1	1	Q8IY21		0	5.6242e+06	0	7.366e-05	2.70751	2	1053.56	-0.114521	62.9272	0	C1203	66.67	C1203	0.021
High	FSQDHLVIY	11	1	1	Q9BW91		0	6.55209e+06	0	0.001904	2.7057	2	1121.56	-1.14519	68.1243	0	C1203	77.78	C1203	0.0724
High	NQKPPSAEY	18	1	1	Q9UPN3		0	9.3185e+06	0	0.0008588	2.70364	2	1033.49	-0.246537	33.3817	0	C1203	48.15	B1503	0.0102
High	RAFDQGADAIY	5	1	1	Q9UDW1		0	4.37769e+06	0	0.0003669	2.69359	2	1226.58	-0.660429	57.6342	0		0	B1503	0.8623
High	GQWGGGSHY	88	1	1	B1AH88		0	1.00547e+08	0	0.0007797	2.69239	2	948.395	-0.858471	38.4912	0	C1203	40.74	B1503	0.0081
High	FQKVITEY	9	1	1	Q7KZF4		0	1.85051e+06	0	0.000897	2.69117	2	1027.54	-1.38204	54.4827	0	C1203	56.67	B1503	0.1722
High	TTFESSHYL	19	1	1	Q16531		0	9.6792e+06	0	0.001126	2.69049	2	1084.49	0.312907	56.5958	0	C1203	74.07	A6802	0.0051
High	YTSGPGSRI	18	1	1	P05787		0	2.77806e+07	0	0.00161	2.68969	2	937.473	-0.714906	36.5201	0	C1203	70.37	A6802	0.0996
High	LQRATPEQY	8	1	1	P14324		0	3.54635e+06	0	0.0003026	2.68679	2	1105.56	-0.252549	38.3405	0	C1203	40.74	B1503	0.0111
High	RKLPEKTQTF	3	1	1	Q96SY0		0	1.57837e+06	0	0.0003156	2.68615	3	1247.71	0.19222	33.2817	0	C1203	34.29	B1503	0.1149
High	QAYSGIQQY	12	2	2	Q92879;O95319		0	3.74692e+06	0	0.0001949	2.68467	2	1057.49	-0.106596	54.1524	0	C1203	85.19	C1203	0.0283
High	RQLEDILSTY	17	1	1	P40222		0	4.34283e+06	0	0.001279	2.67583	2	1237.64	0.336522	73.874	0	C1203	28.57	B1503	0.0124
High	YTFFTPNNI	47	1	1	P17844		0	8.42643e+07	0	0.001223	2.6748	2	1116.54	-0.221309	88.5194	0	C1203	70.37	A6802	0.0343
High	SIAQIIVTV	15	1	1	Q9UNQ0		0	2.8452e+06	0	7.494e-05	2.6729	2	943.582	-0.300436	90.5609	0	C1203	51.85	A6802	0.0211
High	RLFGTTVTF	31	1	1	Q15904		0	1.97923e+07	0	0.0006731	2.66908	2	1041.57	-0.585794	76.5324	0	C1203	44.44	B1503	0.0118
High	YGYEHILTL	22	1	1	Q96AX1		0	5.54062e+06	0	0.00145	2.66603	2	1108.57	-0.699445	77.6782	0	C1203	59.26	C1203	0.0034
High	EVSQVKETL	19	1	1	P30622		0	2.3305e+07	0	0.001836	2.65883	2	1032.56	-1.21591	43.688	0	C1203	44.44	A6802	0.1209
High	FAYPNRPDVL	25	1	1	Q03518		0	2.13929e+07	0	0.001223	2.65866	2	1191.62	-0.377073	67.1114	0	C1203	80	C1203	0.1481
High	EVFPDQFIHL	41	1	1	P07686		0	1.15724e+07	0	3.967e-07	2.65803	2	1244.63	-0.312114	91.6057	0	C1203	40	A6802	0.0767
High	DTFDKNYKA	21	1	1	Q9BZG1		0	1.75785e+07	0	0.00181	2.65093	2	1101.52	-0.762609	35.7084	0	C1203	37.04	A6802	0.0393
High	KLFPGSPAIY	11	7	7	P49792;P0DJD0;P0DJD1;A6NKT7;Q7Z3J3;Q99666;O14715		0	5.03276e+06	0	0.001104	2.63834	2	1092.61	-0.482638	72.3547	0	C1203	51.43	B1503	0.1045
High	SAFPFPVTV	23	1	1	Q96K37		0	6.51573e+06	0	0.0006541	2.63813	2	964.513	-0.494552	98.9842	0	C1203	96.3	C1203	0.0042
High	RQFPTAFEF	18	1	1	Q13614		0	2.83569e+06	0	0.0008623	2.63486	2	1142.56	-0.584512	78.6005	0	C1203	44.44	B1503	0.0057
High	STIFPLDGV	13	1	1	O60318		0	1.76073e+06	0	0.001828	2.63232	2	948.503	-0.269617	92.292	0	C1203	66.67	A6802	0.0135
High	GKYASIILF	31	1	1	Q8TCB0		0	1.14667e+07	0	0.001681	2.62933	2	1011.59	-0.535504	83.1582	0	C1203	40.74	B1503	0.034
High	RSSPPGHYY	9	1	1	Q9NX40		0	5.81683e+06	0	0.0004418	2.62183	2	1063.49	-1.08034	31.2696	0	C1203	77.78	C1203	0.1025
High	MVVDIVQEL	26	1	1	O00764		0	1.55505e+07	0	1.568e-05	2.61794	2	1045.56	-0.359099	93.7287	0	C1203	48.15	A6802	0.0082
High	EVYGSLPAFL	20	1	1	Q01650		0	2.75515e+07	0	0.0001626	2.61467	2	1095.57	-0.391054	98.9454	0	C1203	40	A6802	0.1394
High	RQLTLGAY	8	1	1	O95619		0	1.49674e+06	0	0.001637	2.6119	2	921.514	-1.41906	54.9365	0	C1203	26.67	B1503	0.1321
High	GKVKSGGTY	21	1	1	P55017		0	1.36586e+07	0	0.001188	2.60847	2	896.483	-0.762474	17.9911	0	C1203	40.74	B1503	0.1015
High	YAFPKSITV	29	1	1	P53985		0	5.43669e+07	0	0.0009967	2.60134	2	1025.57	-0.777915	71.0398	0	C1203	96.3	C1203	0.0014
High	AQYENPPHIY	4	2	2	Q12965;O00160		0	2.30974e+06	0	0.0006897	2.59811	2	1231.57	-0.962715	54.9025	0	C1203	40	B1503	0.0053
High	DTITPQQVFV	10	1	1	Q9NZW5		0	2.01337e+06	0	0.0002076	2.59617	2	1147.6	-0.424145	82.8334	0	C1203	45.71	A6802	0.1713
High	mAAAWPLLL	64	1	1	P15151	M1(Oxidation)	0	9.38285e+06	0	0.001005	2.59044	2	1001.55	-0.467099	106.121	0	C1203	85.19	C1203	0.0433
High	MKLLTGLVF	11	2	2	P0DJI8;P0DJI9		0	812097	0	0.001336	2.58382	2	1021.61	-0.371684	92.4472	0	C1203	37.04	B1503	0.1401
High	EVFPPPVAmL	6	1	1	Q9UPN6	M9(Oxidation)	0	1.23242e+06	0	0.001162	2.57919	2	1115.58	-0.658596	93.8621	0	C1203	45.71	A6802	0.0339
High	TVSEVIQGL	27	1	1	Q8WWW0		0	9.08071e+06	0	0.000971	2.57673	2	945.525	-0.051032	76.1544	0	C1203	48.15	A6802	0.0154
High	DVNLPGVNV	12	1	1	Q09666		0	3.09412e+06	0	9.844e-05	2.57385	2	926.494	-0.694476	78.9563	0	C1203	40.74	A6802	0.0715
High	EVWGEEFEKL	9	1	1	P23921		0	1.22163e+06	0	2.337e-06	2.5734	2	1265.6	-0.100642	79.2258	0	C1203	31.43	A6802	1.1918
High	QKFLQGLVY	10	1	1	Q5J8M3		0	6.90548e+06	0	0.001248	2.56224	2	1095.62	-0.39339	75.0206	0	C1203	48.15	B1503	0.0525
High	FVGYFPATV	13	1	1	Q9HCE1		0	3.61974e+06	0	0.001597	2.56133	2	1000.51	-0.58877	88.2762	0	C1203	48.15	A6802	0.1668
High	EVIGGTNHTL	14	1	1	Q9P2E3		0	4.72899e+06	0	0.0005889	2.55921	2	1040.54	-0.80614	47.0796	0	C1203	40	A6802	0.0727
High	AQLPEKVEY	11	1	1	P51532		0	9.74694e+06	0	0.000891	2.55819	2	1076.56	-0.669041	53.3999	0	C1203	55.56	B1503	0.006
High	RQYAKDIGF	17	1	1	P62273		0	6.05677e+06	0	0.0005529	2.55419	2	1097.57	-0.743144	47.8945	0	C1203	37.04	B1503	0.0026
High	YKEDHPFEY	2	1	1	Q9H0R8		0	2.16212e+06	0	0.0006843	2.55047	2	1227.53	-0.328872	47.95	0	C1203	51.85	B1503	0.1293
High	LSADIFQQV	17	1	1	O94916		0	1.29425e+07	0	0.001403	2.54022	2	1020.54	-0.680374	84.8056	0	C1203	74.07	A6802	0.0684
High	ASYPELRLF	9	1	1	O75718		0	4.52854e+06	0	0.0007759	2.53087	2	1095.58	-0.724884	82.6496	0	C1203	77.78	C1203	0.1506
High	QAYPEVRIV	13	1	1	Q08211		0	9.01382e+06	0	0.001153	2.52864	2	1074.59	-0.999497	64.0537	0	C1203	92.59	C1203	0.1422
High	FTAPTFTGSFL	8	1	1	Q9NXE4		0	683420	0	0.001452	2.52395	2	1188.59	0.0624506	99.3008	0		0	A6802	1.2203
High	AQMAQILSF	5	1	1	P35237		0	525263	0	0.001299	2.52073	2	1008.52	0.0871385	90.3147	0	C1203	40.74	B1503	0.0036
High	QVFPGLLERV	15	1	1	Q9UBB4		0	2.83022e+06	0	0.001059	2.51238	2	1157.67	-0.324189	81.6593	0	C1203	40	A6802	0.2207
High	EVYEKPVQV	24	1	1	Q9Y508		0	2.59245e+07	0	0.0007095	2.50099	2	1090.58	-0.347571	48.9887	0	C1203	51.85	A6802	0.0058
High	mTPEIIQKL	56	1	1	Q9UMS4	M1(Oxidation)	0	1.22468e+07	0	0.0006744	2.49684	2	1088.6	-0.755476	66.547	0	C1203	74.07	A6802	0.0397
High	EASHITEQQL	9	1	1	Q9BV73		0	4.0495e+06	0	0.001907	2.48715	2	1155.56	-0.69341	44.0233	0	C1203	62.86	A6802	1.2743
High	EIAEAYLGYPV	16	1	1	P08107		0	2.05552e+06	0	0.0003487	2.47497	2	1224.61	-0.239927	86.5256	0		0	A6802	1.2683
High	AQPETRVSY	19	1	1	Q5SWA1		0	2.17293e+07	0	0.001133	2.47229	2	1050.52	-0.765162	39.7117	0	C1203	48.15	B1503	0.0099
High	YSIDLSERV	2	1	1	Q6NTF9		0	2.39477e+06	0	0.0008799	2.47127	2	1081.55	-0.145723	65.0331	0	C1203	74.07	A6802	0.0375
High	YAAGVHSVL	8	1	1	O43299		0	4.9627e+06	0	0.0006274	2.46975	2	916.488	-0.494809	52.5199	0	C1203	88.89	C1203	0.008
High	DVAPPLIVHNI	7	1	1	P23458		0	1.05531e+06	0	0.000744	2.46235	2	1187.68	-0.36816	79.0812	0		0	A6802	0.5607
High	EIFADPRTV	20	1	1	Q92871		0	1.11308e+07	0	0.001889	2.45711	2	1047.55	-1.11435	61.0378	0	C1203	51.85	A6802	0.1054
High	SSAPTARVF	18	1	1	O94906		0	1.14067e+07	0	0.0007994	2.43486	2	935.495	0.329569	48.1923	0	C1203	77.78	C1203	0.1048
High	SSFPTVVIY	30	1	1	Q9HCN4		0	5.83566e+07	0	0.001266	2.42986	2	1012.53	-0.884991	89.095	0	C1203	85.19	C1203	0.0227
High	AQVPFEQIL	40	1	1	Q99828		0	6.92651e+07	0	0.001792	2.42807	2	1044.57	-0.735639	91.6077	0	C1203	48.15	B1503	0.1391
High	GQIPELIFY	11	3	3	Q9Y2F9;Q96KE9;Q9H0C5		0	540272	0	0.000237	2.42193	2	1079.58	-0.353356	98.5391	0	C1203	48.15	B1503	0.0252
High	TVADVVLWSV	15	1	1	Q13155		0	3.7335e+06	0	6.6e-05	2.42174	2	1088.6	-0.234273	99.5068	0	C1203	31.43	A6802	0.0313
High	QQFRNAPPF	23	1	1	O60830		0	1.51312e+07	0	0.00175	2.41049	2	1104.56	-1.13414	56.0839	0	C1203	33.33	B1503	0.035
High	EVIDFSHGL	44	3	3	Q96GS6;Q5VST6;Q6PCB6		0	2.4366e+08	0	0.001222	2.40455	2	1016.5	-1.23433	73.1786	0	C1203	40.74	A6802	0.0026
High	TTIEAIHGL	24	1	1	Q92905		0	2.92507e+07	0	0.001038	2.40369	2	954.525	-0.460215	62.0636	0	C1203	74.07	A6802	0.004
High	ETFDFVHNV	19	1	1	Q96E29		0	8.5549e+06	0	0.001576	2.40356	2	1107.51	-0.922987	71.4598	0	C1203	77.78	A6802	0.001
High	EVISKLYAV	38	1	1	P50990		0	3.15904e+08	0	0.001237	2.37251	2	1021.59	-0.397883	65.1864	0	C1203	40.74	A6802	0.0052
High	IALPSLRIL	18	1	1	P00403		0	3.00573e+06	0	0.001344	2.36685	2	995.661	-0.664122	90.6127	0	C1203	85.19	C1203	0.1144
High	ETADITHAL	13	1	1	Q15042		0	9.01129e+06	0	0.001401	2.36134	2	970.483	-0.613368	54.3829	0	C1203	74.07	A6802	0.0018
High	RSLQENIAY	5	1	1	Q03518		0	3.98497e+06	0	0.001614	2.35449	2	1093.56	-1.25996	51.1128	0	C1203	70.37	B1503	0.1512
High	GQFGVGFYSAY	7	3	3	Q58FF6;P07900;P08238		0	616342	0	0.001655	2.34272	2	1195.54	-0.275854	85.8006	0		0	B1503	0.3078
High	DVAEFLYQV	26	1	1	Q9Y5M8		0	8.65647e+06	0	0.0003563	2.3381	2	1083.54	-0.383357	97.3248	0	C1203	44.44	A6802	0.0045
High	GHYLGEFSITY	1	1	1	P62841		0	3.49512e+06	0	0.001687	2.33398	2	1286.61	-0.0397653	78.7405	0		0	B1503	1.6918
High	FKSNVTKTm	6	1	1	Q9Y255	M9(Oxidation)	0	1.0161e+06	0	0.0001915	2.31995	2	1071.55	-0.584279	25.0528	0	C1203	44.44	B1503	0.1681
High	WAYPRQVFI	5	1	1	Q9P2D0		0	1.62578e+06	0	0.001888	2.28153	2	1179.63	-0.994345	80.6437	0	C1203	81.48	C1203	0.0611
High	RQINWTVLY	18	1	1	P83731		0	4.48957e+06	0	0.001084	2.27759	2	1192.65	-0.379924	78.5226	0	C1203	40.74	B1503	0.0094
High	YAAPGGLIGV	14	2	2	Q2VIR3;P41091		0	2.08659e+07	0	0.001271	2.24455	2	917.509	-0.465074	78.9076	0	C1203	62.86	A6802	0.0946
High	YTVQFTTmV	3	1	1	Q7Z6Z7	M8(Oxidation)	0	1.10245e+06	0	0.00167	2.24399	2	1105.52	0.0260499	74.4997	0	C1203	70.37	A6802	0.0224
High	DTFYVQVLV	5	1	1	Q5BJD5		0	1.32629e+06	0	0.00185	2.24073	2	1083.57	-0.160845	99.6475	0	C1203	74.07	A6802	0.0353
High	GQDKPHETY	1	1	1	Q12789		0	470983	0	0.001453	2.23534	2	1074.48	-0.508738	22.6018	0	C1203	40.74	B1503	0.049
High	HKYSGKEGDKF	33	1	1	P26447		0	1.80664e+06	0	0.001387	2.219	3	1295.64	-0.0302918	22.8083	0		0	B1503	1.2533
High	ETFGDYPQPQL	5	1	1	Q96H22		0	1.72159e+06	0	0.0001603	2.19621	2	1294.59	-0.402658	78.3369	0		0	A6802	0.9105
High	LAFPGEmLL	45	1	1	P43007	M7(Oxidation)	0	2.27722e+06	0	0.00167	2.16686	2	1006.53	-0.209443	98.6991	0	C1203	85.19	C1203	0.0274
High	VVYPWTQRF	25	5	5	P68871;P02042;P02100;P69891;P69892		0	6.84289e+06	0	0.0003001	2.16614	2	1195.63	0.00902535	76.8876	0	C1203	44.44	C1203	0.0195
High	YSFYLPIAA	11	1	1	P14324		0	3.40804e+06	0	0.001805	2.1441	2	1044.54	-0.228598	100.044	0	C1203	44.44	C1203	0.3945
High	NTIPFIIRY	7	1	1	Q8N5C6		0	1.52392e+07	0	0.0005194	2.11695	2	1136.65	0.963505	83.3477	0	C1203	81.48	C1203	0.1253
High	ETIPLTAEKL	14	1	1	P24385		0	6.90433e+06	0	0.00125	2.08944	2	1114.63	-0.48088	67.1185	0	C1203	51.43	A6802	0.0816
High	HKSPDGRTY	1	1	1	O75400		0	298469	0	0.001475	2.07803	2	1060.52	-0.503725	18.4609	0	C1203	55.56	B1503	0.0347
High	TTSEVSWISSI	4	1	1	P53985		0	488315	0	0.001289	2.06479	2	1209.6	0.48619	90.4674	0		0	A6802	1.6687
High	ETYPDPVRV	46	1	1	P49588		0	2.00417e+08	0	0.001086	2.0009	2	1075.54	-0.99691	57.8147	0	C1203	85.19	A6802	0.0048
High	IQRQNEQmm	7	1	1	Q96PP8	M8(Oxidation); M9(Oxidation)	0	249774	0	0.0003967	1.9498	2	1209.54	0.0599807	18.5024	0	C1203	29.63	B1503	0.1348
High	EIYKEFFEV	2	1	1	O00255		0	1.21171e+06	0	0.001567	1.92832	2	1203.59	0.0398951	81.9903	0	C1203	44.44	A6802	0.0283
High	EVSNIVKEAI	15	1	1	P63172		0	7.38633e+06	0.001	0.004362	3.46851	2	1101.61	-0.916863	63.2664	0	C1203	11.43	A6802	0.435
High	KKIEDNNTL	37	1	1	P62750		0	5.31471e+07	0.001	0.002791	3.44309	2	1074.58	-0.212502	28.9111	0	C1203	44.44	B1503	0.2575
High	GKVGFQSFF	8	1	1	P60903		0	2.89722e+06	0.001	0.002008	3.39109	2	1016.52	-0.514979	78.6187	0	C1203	33.33	B1503	0.296
High	SKQSSSTNY	3	1	1	Q9UHB6		0	904496	0.001	0.005054	3.37347	2	1001.45	-0.512098	18.6931	0	C1203	40.74	B1503	0.131
High	VQRQGVSY	7	1	1	Q8IVT2		0	1.68505e+06	0.001	0.004476	3.27284	2	936.489	-0.638511	32.8601	0	C1203	30	B1503	0.051
High	GKSPLFGQYF	2	1	1	Q5VT66		0	444728	0.001	0.003308	3.20681	2	1143.58	-1.54841	79.1389	0	C1203	37.14	B1503	0.6991
High	DVAQIFNNI	10	1	1	Q9Y376		0	1.27941e+06	0.001	0.003113	3.20668	2	1033.53	-0.150718	93.1737	0	C1203	33.33	A6802	0.0325
High	GQFASDVQF	14	1	1	Q02833		0	4.07902e+06	0.001	0.001914	3.19742	2	998.457	-0.447967	72.2612	0	C1203	37.04	B1503	0.0109
High	SKKPESTSF	44	1	1	Q9BT25		0	1.47311e+07	0.001	0.002636	3.18123	2	1010.51	-0.88015	25.7647	0	C1203	37.04	B1503	0.0119
High	AAAGLHSNV	14	1	1	Q9UJX3		0	1.06922e+07	0.001	0.004185	3.17894	2	839.437	0.106086	32.5223	0	C1203	85.19	A6802	0.3613
High	GKLQKTVSY	3	1	1	P12757		0	1.3668e+06	0.001	0.00535	3.17853	2	1023.58	-0.408329	34.2511	0	C1203	40.74	B1503	0.0306
High	LSAGATKVY	2	1	1	P11908		0	1.18551e+06	0.001	0.004895	3.1703	2	909.504	-0.230369	43.3056	0	C1203	81.48	C1203	0.437
High	DAANVmVYV	9	1	1	Q9Y4C1	M6(Oxidation)	0	3.85881e+06	0.001	0.00351	3.16238	2	997.466	0.278528	68.9926	0	C1203	81.48	A6802	0.0105
High	AVAAVLTQV	13	1	1	Q99720		0	1.73774e+06	0.001	0.002104	3.14393	2	871.525	-0.0981018	71.9245	0	C1203	44.44	A6802	0.0366
High	TTVDINTQV	21	1	1	Q14676		0	2.43013e+07	0.001	0.003584	3.13046	2	990.511	0.851744	59.0794	0	C1203	70.37	A6802	0.0027
High	YAKLIAEL	19	1	1	Q8NI27		0	5.82546e+06	0.001	0.004069	3.13031	2	920.545	-0.296413	69.8638	0	C1203	93.33	C1203	1.1616
High	GKKVEGTAF	4	1	1	P01024		0	1.38478e+06	0.001	0.004518	3.11957	2	936.514	-0.543936	30.4284	0	C1203	29.63	B1503	0.0816
High	ETFYIGKLI	6	1	1	Q7KZ85		0	934683	0.001	0.002442	3.10296	2	1083.61	-0.623487	84.8688	0	C1203	66.67	A6802	0.0935
High	GKAPLNVQF	11	1	1	O75369		0	6.55014e+06	0.001	0.003829	3.10012	2	973.546	-0.349329	63.1642	0	C1203	44.44	B1503	0.0364
High	SMGPVRVAF	7	1	1	P29279		0	4.52588e+06	0.001	0.005366	3.08904	2	963.509	0.562793	67.2842	0	C1203	40.74	B1503	0.0604
High	DLSNIINKL	13	1	1	Q9GZL7		0	1.55824e+06	0.001	0.0055	3.08159	2	1029.59	-0.722667	85.3896	0	C1203	44.44	A6802	0.4715
High	EVAPAGSQV	7	1	1	O75147		0	4.29922e+06	0.001	0.002511	3.07594	2	857.436	-0.122971	41.5825	0	C1203	48.15	A6802	0.0081
High	TTTQITKTV	17	1	1	P11171		0	14473144	0.001	0.003886	3.07201	2	992.562	-0.654094	38.5096	0	C1203	74.07	A6802	0.0922
High	TASPVIKAV	26	1	1	Q8WU10		0	1.1033e+08	0.001	0.003546	3.06799	2	885.54	-0.262629	47.9422	0	C1203	92.59	A6802	0.084
High	FTAAIISRV	18	1	1	Q9Y570		0	7.85363e+06	0.001	0.004471	3.0608	2	977.576	-1.46043	67.6357	0	C1203	77.78	A6802	0.0048
High	EITDINENI	3	1	1	Q9H2G4		0	1.44019e+06	0.001	0.003767	3.03408	2	1060.52	-0.410095	66.2435	0	C1203	33.33	A6802	0.0314
High	VKVVPTVY	7	1	1	Q9Y282		0	4.31429e+06	0.001	0.00378	3.02851	2	904.55	-0.51965	57.5541	0	C1203	36.67	B1503	0.4625
High	AAFEKALEV	16	1	1	Q13325		0	8.33338e+06	0.001	0.005502	3.02281	2	977.529	-0.833485	62.3722	0	C1203	92.59	C1203	0.0125
High	EVFEGDIQQL	2	1	1	P20908		0	788475	0.001	0.002122	3.02148	2	1177.57	-0.679189	77.9439	0	C1203	45.71	A6802	0.0995
High	AKSTSGEGF	4	7	7	P49792;P0DJD0;P0DJD1;A6NKT7;Q7Z3J3;Q99666;O14715		0	461098	0.001	0.002482	3.01876	2	883.416	0.00529497	27.6717	0	C1203	37.04	B1503	0.2863
High	ETISPSGQGV	7	1	1	P23610		0	1.75648e+07	0.001	0.003652	3.01211	2	974.481	1.97157	48.2184	0	C1203	51.43	A6802	0.0385
High	NAYSRILQA	16	1	1	O15230		0	6.22842e+06	0.001	0.005402	3.00963	2	1035.56	-1.22537	56.8928	0	C1203	51.85	A6802	0.3968
High	PQRATSNVF	19	3	3	P19105;O14950;P24844		0	1.73667e+07	0.001	0.003363	3.00926	2	1019.53	-1.32513	41.4776	0	C1203	33.33	B1503	0.2068
High	DLmAPQPGV	22	1	1	Q96B49	M3(Oxidation)	0	4.23207e+06	0.001	0.002164	3.009	2	943.453	-2.04411	60.2643	0	C1203	37.04	A6802	0.2434
High	GKTFSQTSY	9	1	1	Q96IR2		0	2.15437e+06	0.001	0.003668	2.99982	2	1018.48	-0.684679	39.1726	0	C1203	37.04	B1503	0.2193
High	DTFSVIKEV	10	1	1	O00534		0	3.34396e+06	0.001	0.001931	2.98676	2	1037.55	-0.0811237	72.6213	0	C1203	85.19	A6802	0.0252
High	GKAFSQSSY	12	3	3	Q9UNY5;Q8NF99;Q9NQZ8		0	5.88449e+06	0.001	0.005213	2.98496	2	974.458	-0.25057	37.1337	0	C1203	40.74	B1503	0.1022
High	IAFPSANEV	5	1	1	Q9NXH9		0	3.41071e+06	0.001	0.005223	2.97873	2	947.483	-0.254859	73.09	0	C1203	88.89	C1203	0.0131
High	RKIGDTSVSY	14	1	1	P20700		0	6.80375e+06	0.001	0.002043	2.97842	2	1125.59	-0.984893	41.3507	0	C1203	37.14	B1503	0.0209
High	DSSEIHFKV	17	1	1	P63165		0	7.82195e+06	0.001	0.004416	2.97364	2	1061.52	-1.33151	55.1154	0	C1203	74.07	A6802	0.0528
High	AKSGVGTAL	11	1	1	P02786		0	2.03189e+07	0.001	0.003525	2.97106	2	803.462	-0.361777	35.8863	0	C1203	48.15	B1503	0.1989
High	ITVSIIKEL	8	1	1	Q8TED0		0	3.51991e+06	0.001	0.003542	2.95967	2	1015.64	-0.544002	78.9527	0	C1203	81.48	C1203	0.2229
High	NTIDPSHPm	11	1	1	P49588	M9(Oxidation)	0	1.84511e+06	0.001	0.005551	2.95093	2	1027.45	-1.21218	34.7637	0	C1203	62.96	A6802	0.0196
High	AKKDPQEGY	5	1	1	Q14562		0	1.77481e+06	0.001	0.002472	2.92063	2	1035.51	-0.279857	20.0642	0	C1203	44.44	B1503	0.1981
High	IKVIPTVF	21	1	1	P14902		0	1.00196e+07	0.001	0.005294	2.91755	2	916.587	-0.0718423	78.3469	0	C1203	33.33	B1503	0.797
High	KAYGASKTF	6	1	1	P27694		0	3.06767e+06	0.001	0.002764	2.91524	2	972.515	-0.377716	30.4577	0	C1203	81.48	C1203	0.01
High	ETILISNNQV	8	1	1	Q9H9A6		0	2.64283e+06	0.001	0.005016	2.91198	2	1130.61	-0.170911	68.1441	0	C1203	40	A6802	0.1332
High	FKWSGENSY	5	1	1	Q8NI08		0	2.86753e+06	0.001	0.002104	2.91171	2	1117.49	-0.774184	57.0939	0	C1203	44.44	B1503	0.0393
High	SAIDRIFTL	22	1	1	Q86TU7		0	7.11829e+06	0.001	0.002311	2.90764	2	1035.58	-0.894415	84.8379	0	C1203	85.19	C1203	0.0032
High	KAISGVHTV	32	2	2	Q2VIR3;P41091		0	4.12975e+07	0.001	0.003694	2.90434	2	911.53	-0.870371	31.3157	0	C1203	85.19	C1203	0.0197
High	VAQAPWKAV	5	1	1	P31327		0	1.73489e+06	0.001	0.004835	2.88981	2	969.551	-0.879223	56.6952	0	C1203	81.48	C1203	1.2564
High	YNFEKPVVm	7	1	1	O43929	M9(Oxidation)	0	2.60451e+06	0.001	0.003231	2.8841	2	1142.55	-0.752247	56.8676	0	C1203	51.85	C1203	0.0617
High	EVLGPLAQV	3	1	1	Q8N196		0	976666	0.001	0.002503	2.88115	2	925.535	-0.367957	80.9234	0	C1203	40.74	A6802	0.006
High	VAHSPPSTL	17	1	1	Q03252		0	1.01125e+07	0.001	0.003931	2.88088	2	908.481	-3.10384	39.6301	0	C1203	88.89	C1203	0.016
High	RQIGSRSY	47	1	1	P51114		0	3.80321e+07	0.001	0.002817	2.87567	2	966.511	-0.376889	27.1297	0	C1203	30	B1503	0.0166
High	HQITVLHVY	1	1	1	Q9NYP7		0	2.16146e+06	0.001	0.002999	2.87063	2	1109.61	-0.719804	56.702	0	C1203	40.74	B1503	0.0082
High	EAAEVILRV	43	1	1	P78371		0	3.7735e+08	0.001	0.002622	2.86929	2	999.582	-0.936631	68.2131	0	C1203	88.89	A6802	0.0081
High	TTADPFVKV	2	1	1	Q8IV01		0	3.35881e+06	0.001	0.004689	2.8663	2	977.53	-0.323749	59.9486	0	C1203	77.78	A6802	0.0025
High	VKAPSSQTF	11	1	1	Q86TC9		0	4.04328e+06	0.001	0.003663	2.85945	2	964.509	-0.492813	42.0976	0	C1203	48.15	B1503	0.0054
High	STFGYVHGV	14	1	1	P38606		0	6.55983e+06	0.001	0.00386	2.85653	2	966.468	-0.418436	58.0611	0	C1203	77.78	A6802	0.0026
High	FTSPLTHNV	14	1	1	Q96A29		0	5.71064e+06	0.001	0.004683	2.84486	2	1015.52	-0.914124	56.4491	0	C1203	81.48	A6802	0.0046
High	IKTVYPASY	2	1	1	Q9H211		0	1.48541e+06	0.001	0.002807	2.84103	2	1041.56	-0.557447	53.6469	0	C1203	40.74	B1503	0.0639
High	LAAYHPWVV	27	1	1	Q5TA50		0	1.10945e+07	0.001	0.003101	2.8359	2	1055.57	-0.00280329	73.1552	0	C1203	85.19	C1203	0.6113
High	LQQPRSLTY	11	1	1	P22102		0	3.46746e+06	0.001	0.002886	2.82462	2	1105.6	-1.35941	51.0858	0	C1203	51.85	B1503	0.0046
High	SAYAGQTQY	1	1	1	O95677		0	815738	0.001	0.002132	2.82394	2	988.436	-0.742996	42.7734	0	C1203	77.78	C1203	0.0133
High	LVSPITGEKI	8	1	1	Q15459		0	1.90882e+06	0.001	0.005044	2.82333	2	1056.63	-2.0216	64.6701	0	C1203	20	A6802	1.2718
High	GKFQDNFEF	7	2	2	Q15691;Q9UPY8		0	4.6712e+06	0.001	0.003498	2.8199	2	1131.51	-0.264951	69.4357	0	C1203	37.04	B1503	0.0536
High	GKRLDVTGF	2	1	1	Q9UIY3		0	2.16151e+06	0.001	0.003859	2.81507	2	992.552	-0.0569968	48.8474	0	C1203	33.33	B1503	0.1662
High	SISDVIAQV	18	1	1	Q9HCJ1		0	1.40844e+07	0.001	0.004669	2.80941	2	931.509	-0.418099	79.4714	0	C1203	48.15	A6802	0.01
High	AKAGITTTL	11	1	1	P33992		0	3.06473e+06	0.001	0.004875	2.8071	2	875.52	-0.139861	47.22	0	C1203	51.85	B1503	0.1159
High	VALLRVTPF	3	1	1	Q8N4H5		0	956565	0.001	0.004074	2.80642	2	1015.63	-0.481642	82.378	0	C1203	74.07	C1203	0.6391
High	GQTASGKTY	7	1	1	Q02224		0	695344	0.001	0.002961	2.8059	2	912.442	-0.106417	19.7574	0	C1203	44.44	B1503	0.0187
High	EISSILQEL	24	2	2	Q96L14;Q5SW79		0	1.1912e+07	0.001	0.004578	2.80183	2	1031.56	-0.614994	95.5169	0	C1203	48.15	A6802	0.0689
High	VKAEIRQQF	8	1	1	P30154		0	2.69041e+06	0.001	0.002979	2.80136	2	1118.63	-0.727967	41.8633	0	C1203	40.74	B1503	0.0242
High	AVIGDVIRV	12	1	1	Q9NR30		0	1.82845e+06	0.001	0.004205	2.79491	2	941.577	-0.489735	72.0105	0	C1203	51.85	A6802	0.0594
High	AQVVQWVSF	13	1	1	P26641		0	1.16872e+06	0.001	0.002138	2.78734	2	1063.56	-0.320628	92.0033	0	C1203	37.04	B1503	0.0652
High	DVSSILTSI	5	2	2	P49459;P63146		0	849238	0.001	0.003282	2.78469	2	934.509	-0.248867	96.9429	0	C1203	37.04	A6802	0.0302
High	EVAPSFGTL	19	1	1	Q5SRE5		0	2.15829e+07	0.001	0.003131	2.78269	2	920.472	-0.356125	77.3636	0	C1203	51.85	A6802	0.0246
High	YAQVmRTV	6	1	1	Q9NNW7	M5(Oxidation)	0	1.59111e+06	0.001	0.004335	2.7783	2	983.497	-0.563548	37.2637	0	C1203	80	C1203	3.4822
High	IASAIVNEL	10	1	1	Q9NR09		0	3.24791e+06	0.001	0.002148	2.77334	2	929.53	-0.40613	76.0162	0	C1203	85.19	C1203	0.052
High	MTADSRSQV	17	1	1	P60900		0	2.18146e+07	0.001	0.003308	2.76947	2	994.462	-0.679614	27.8367	0	C1203	74.07	A6802	0.0169
High	NTAETITRV	13	1	1	O96006		0	7.07625e+06	0.001	0.005136	2.76886	2	1004.54	-0.713511	42.8811	0	C1203	77.78	A6802	0.0041
High	LVANIIQNV	22	1	1	O94915		0	5.17018e+06	0.001	0.004223	2.76601	2	983.588	-0.893959	79.8782	0	C1203	44.44	A6802	0.0264
High	SAKTPGFSV	25	1	1	Q9NY61		0	2.53256e+07	0.001	0.002084	2.76113	2	893.472	-0.66792	50.4795	0	C1203	74.07	C1203	0.3976
High	RQYPEVIKY	5	1	1	Q9UIF8		0	3.80254e+06	0.001	0.003308	2.7606	2	1195.65	-0.911372	50.8806	0	C1203	55.56	B1503	0.0008
High	ETIMNQEKL	7	1	1	P20290		0	3.39978e+06	0.001	0.002313	2.75727	2	1105.55	-0.890169	51.6168	0	C1203	66.67	A6802	0.3546
High	RAIDFSPYL	20	1	1	P17676		0	5.79907e+06	0.001	0.004006	2.75417	2	1081.57	-0.711163	77.6368	0	C1203	77.78	C1203	0.0061
High	TVFEHTFHV	6	1	1	P41250		0	4.93771e+06	0.001	0.002154	2.75353	2	1116.55	-0.0111866	59.5174	0	C1203	44.44	A6802	0.0026
High	SQLVAGVAF	11	1	1	Q99832		0	3.6202e+06	0.001	0.005081	2.75257	2	891.493	-0.176747	80.5844	0	C1203	33.33	B1503	0.0138
High	KQLPESESF	6	1	1	Q8NI35		0	2.14676e+06	0.001	0.00227	2.74885	2	1064.53	-0.444401	47.0166	0	C1203	37.04	B1503	0.0082
High	SQLPKLLVY	3	1	1	P11117		0	1.71301e+06	0.001	0.005012	2.7472	2	1060.64	-0.649989	77.1939	0	C1203	51.85	B1503	0.0043
High	SVQAPSYGA	5	1	1	P05783		0	1.50709e+06	0.001	0.002869	2.74522	2	879.421	-0.13813	46.4677	0	C1203	0	A6802	0.6104
High	SQIYQSIEF	8	1	1	Q14152		0	1.71002e+06	0.001	0.001921	2.72976	2	1114.54	-0.428944	81.3726	0	C1203	37.04	B1503	0.0108
High	IKDNVVIVY	14	1	1	Q9Y2T2		0	1.0683e+07	0.001	0.002297	2.72899	2	1062.62	-1.81821	64.833	0	C1203	48.15	B1503	0.0687
High	NSYGSHRTL	2	1	1	Q9Y446		0	2.09896e+06	0.001	0.00199	2.726	2	1034.5	-0.60056	27.8687	0	C1203	81.48	C1203	0.0403
High	AAFDGHAREL	1	1	1	Q3MIP1		0	2.25011e+06	0.001	0.002356	2.72545	2	1086.53	-0.654633	41.9375	0	C1203	82.86	C1203	0.3533
High	GKGKFGNVY	22	3	3	O14965;Q96GD4;Q9UQB9		0	9.4694e+06	0.001	0.002559	2.71467	2	969.515	-0.729575	35.7079	0	C1203	40.74	B1503	0.0932
High	EVAGmLIGL	14	1	1	Q16850	M5(Oxidation)	0	7.66556e+06	0.001	0.003365	2.71113	2	918.497	-0.042178	82.6428	0	C1203	48.15	A6802	0.0084
High	EVINTVAQV	21	1	1	O15121		0	2.11513e+07	0.001	0.003394	2.7108	2	972.535	-0.96499	64.0755	0	C1203	40.74	A6802	0.0059
High	EVIGKITAL	11	1	1	O43264		0	1.36584e+07	0.001	0.003852	2.70412	2	943.582	-0.311034	66.4134	0	C1203	44.44	A6802	0.0198
High	EIKDQPQNV	12	1	1	O14879		0	7.20137e+06	0.001	0.002817	2.70201	2	1070.55	-0.622701	35.7508	0	C1203	44.44	A6802	0.6185
High	AATEIVERV	14	1	1	Q9UID3		0	9.54612e+06	0.001	0.004888	2.70104	2	987.546	-1.42928	50.5775	0	C1203	85.19	A6802	0.27
High	AAAAAQSVY	5	1	1	P07203		0	2.34229e+06	0.001	0.003506	2.69807	2	851.426	-0.242642	42.4345	0	C1203	85.19	B1503	0.1505
High	AAFRIVVm	42	1	1	Q8WUI4	M8(Oxidation)	0	7.87355e+06	0.001	0.004064	2.69347	2	922.518	-0.413663	62.7412	0	C1203	80	C1203	0.9346
High	ELINIIDGV	13	1	1	Q8NI22		0	4.29725e+06	0.001	0.005552	2.68004	2	985.556	-0.0479088	95.1849	0	C1203	40.74	A6802	0.0378
High	ETFAFQAEI	25	5	5	Q58FF8;Q58FF7;Q14568;P07900;P08238		0	2.25977e+07	0.001	0.003345	2.67974	2	1055.5	-0.23999	86.1118	0	C1203	66.67	A6802	0.0102
High	EAWGSGVEVLV	12	1	1	P03923		0	1.44522e+06	0.001	0.005222	2.67477	2	1145.58	-0.207412	90.5092	0		0	A6802	1.428
High	AVTKIIAKV	14	1	1	P49419		0	6.29278e+06	0.001	0.005229	2.66209	2	942.634	-0.248545	45.5646	0	C1203	44.44	A6802	0.1748
High	IGVEHVVVY	5	1	1	P49411		0	2.52168e+07	0.001	0.003336	2.661	2	1014.56	-0.676622	63.3927	0	C1203	51.85	C1203	0.1241
High	SKYPASSSVF	7	1	1	P09629		0	2.47285e+06	0.001	0.00245	2.66071	2	1072.53	-1.52614	52.2714	0	C1203	40	B1503	0.0308
High	TQTLVREY	10	1	1	P26641		0	3.65788e+06	0.001	0.003938	2.66068	2	1009.53	-0.67862	46.0399	0	C1203	40	B1503	0.9224
High	KAFGWPSSL	15	1	1	Q9HAH1		0	3.78676e+06	0.001	0.005295	2.64808	2	992.52	-0.342946	74.0936	0	C1203	85.19	C1203	0.0051
High	TKYNSPTNF	2	1	1	Q8TCB0		0	1.54811e+06	0.001	0.002828	2.64804	2	1071.51	-0.365713	45.876	0	C1203	37.04	B1503	0.0095
High	SKSGGDYAY	10	3	3	Q9GIP4;Q8MH63;Q01650		0	3.78407e+06	0.001	0.004618	2.64676	2	947.41	-0.270649	30.799	0	C1203	44.44	B1503	0.1166
High	DTFSVQVLV	25	1	1	Q96L33		0	7.19736e+06	0.001	0.005551	2.64559	2	1007.54	0.109031	93.8911	0	C1203	77.78	A6802	0.0147
High	KATAYILSV	10	1	1	P01106		0	3.214e+06	0.001	0.003595	2.64314	2	965.566	-0.763042	65.9981	0	C1203	81.48	C1203	0.2256
High	YVFDGKPPQL	4	1	1	P39748		0	2.50341e+06	0.001	0.004289	2.64241	2	1163.61	-0.451107	71.6854	0	C1203	57.14	C1203	0.1729
High	AQDEHLITF	9	1	1	O75643		0	5.71982e+06	0.001	0.004461	2.62986	2	1073.53	-0.634364	67.1181	0	C1203	44.44	B1503	0.0106
High	FTWEGLYNV	14	1	1	P51784		0	5.2001e+06	0.001	0.004179	2.62935	2	1128.53	-0.984987	95.754	0	C1203	74.07	A6802	0.009
High	MATPLLmQA	11	1	1	P04233	M7(Oxidation)	0	3.41831e+06	0.001	0.002586	2.62818	2	991.495	-0.617114	73.0639	0	C1203	44.44	A6802	0.5602
High	KQQNPRLVY	10	1	1	O00764		0	6.634e+06	0.001	0.003449	2.62453	2	1145.64	-0.191785	39.4309	0	C1203	44.44	B1503	0.0037
High	HAIDRVTTSV	6	1	1	Q9BTT6		0	2.65539e+06	0.001	0.005226	2.62325	2	1098.59	-1.09635	40.479	0	C1203	60	A6802	0.0587
High	KAFGSTIVI	6	1	1	Q13620		0	3.64516e+06	0.001	0.005185	2.61378	2	935.556	-0.536269	67.0051	0	C1203	81.48	C1203	0.0218
High	SQATPHSSY	10	1	1	Q49A88		0	1.2885e+06	0.001	0.002313	2.60498	2	977.432	-0.387685	27.048	0	C1203	40.74	B1503	0.0024
High	NVAEIVIHI	4	1	1	Q9BZD4		0	1.75248e+06	0.001	0.004688	2.59281	2	1007.59	-0.388061	80.0725	0	C1203	44.44	A6802	0.0034
High	YLLPDTKAY	13	1	1	P14625		0	2.8782e+06	0.001	0.002009	2.59266	2	1083.57	-1.84145	64.307	0	C1203	51.85	B1503	0.0331
High	RKLDQVSQF	5	1	1	O60502		0	8.98492e+06	0.001	0.005247	2.58292	2	1120.61	-0.737348	44.0492	0	C1203	37.04	B1503	0.0086
High	AKIPGTGAL	9	1	1	O75298		0	3.0281e+06	0.001	0.003272	2.57617	2	827.498	-0.219518	51.5942	0	C1203	48.15	B1503	0.1149
High	SKLGPGEKY	15	2	2	P53805;Q9UKA8		0	6.9725e+06	0.001	0.003228	2.5697	2	978.525	-0.823176	31.6847	0	C1203	40.74	B1503	0.1059
High	TTSNTVSKL	15	1	1	Q6NZI2		0	7.96752e+06	0.001	0.004998	2.56766	2	950.515	-0.475698	35.0474	0	C1203	74.07	A6802	0.2818
High	AKLPSETIF	7	1	1	P57678		0	4.74992e+06	0.001	0.005217	2.56574	2	1005.56	-0.364448	67.3113	0	C1203	40.74	B1503	0.0346
High	EIFDSRGNPTV	1	1	1	P06733		0	2.44449e+06	0.001	0.002457	2.56253	2	1234.61	-0.141421	58.1401	0		0	A6802	0.5027
High	NIPSFIVRL	13	1	1	P46781		0	5.04753e+06	0.001	0.00223	2.55846	2	1058.64	-0.646054	87.7133	0	C1203	48.15	A6802	0.1038
High	AAADVLEFV	14	1	1	P53618		0	1.89828e+06	0.001	0.001916	2.55471	2	934.488	-0.322923	92.3738	0	C1203	85.19	A6802	0.0618
High	DTSPVFQRL	18	1	1	Q9NU22		0	4.79102e+06	0.001	0.004701	2.55215	2	1062.56	-0.31865	65.0697	0	C1203	77.78	A6802	0.0678
High	ETFQNSVFV	17	1	1	O00767		0	1.45829e+07	0.001	0.004048	2.54432	2	1070.51	-0.83082	77.6246	0	C1203	74.07	A6802	0.0072
High	DTTYINHVV	32	1	1	Q9UBR2		0	5.93524e+07	0.001	0.003185	2.54331	2	1061.52	-1.19767	58.2199	0	C1203	70.37	A6802	0.0533
High	HTSDEQNHL	5	2	2	Q09028;Q16576		0	924781	0.001	0.002154	2.53238	2	1080.47	-0.334047	20.6059	0	C1203	74.07	A6802	0.3739
High	mTNDKTAKV	7	1	1	P46013	M1(Oxidation)	0	3.73953e+06	0.001	0.002638	2.51656	2	1023.51	-0.608724	17.9419	0	C1203	70.37	A6802	0.0173
High	EIIDFFLGA	5	1	1	P15880		0	3.00253e+06	0.001	0.004588	2.51643	2	1024.53	-0.546466	107.969	0	C1203	7.41	A6802	0.047
High	TKTDKQEAY	2	1	1	P17707		0	1.10568e+06	0.001	0.00381	2.51438	2	1083.53	-0.607128	18.5877	0	C1203	40.74	B1503	0.6495
High	EVFGVIRSL	12	1	1	Q15393		0	3.15193e+06	0.001	0.00314	2.51429	2	1019.59	-0.692615	78.5631	0	C1203	51.85	A6802	0.0286
High	QTYGYEHIL	13	1	1	Q96AX1		0	5.57142e+06	0.001	0.003256	2.50377	2	1123.54	-0.493026	63.8028	0	C1203	74.07	A6802	0.1803
High	HNAGISFSV	19	1	1	P40692		0	1.55408e+07	0.001	0.005294	2.50054	2	931.463	-0.325377	62.0325	0	C1203	44.44	A6802	0.2808
High	EVFAWNNEV	8	1	1	P49419		0	6.80888e+06	0.001	0.002391	2.49672	2	1107.51	-0.601354	81.5822	0	C1203	44.44	A6802	0.0077
High	ESADIARAEV	9	1	1	A6NKF1		0	2.68548e+06	0.001	0.002029	2.49597	2	1060.53	-0.888922	46.5139	0	C1203	51.43	A6802	0.0396
High	VTYVPVTTF	1	1	1	P62899		0	1.82599e+06	0.001	0.002997	2.49073	2	1026.55	-0.540522	82.8451	0	C1203	74.07	C1203	0.0271
High	ETFSSYISV	7	1	1	A5PLN9		0	6.55955e+06	0.001	0.004435	2.49069	2	1032.49	-0.700059	80.8603	0	C1203	77.78	A6802	0.0049
High	HSVYITSRV	9	1	1	Q8N961		0	4.87224e+06	0.001	0.003149	2.48053	2	1061.57	-0.519525	42.0912	0	C1203	66.67	A6802	0.052
High	SKTGGYLVY	9	1	1	P46087		0	5.2814e+06	0.001	0.005502	2.47802	2	987.514	-1.00646	55.1691	0	C1203	48.15	B1503	0.0282
High	NAFASVILF	12	1	1	P26641		0	3.97524e+06	0.001	0.003081	2.46367	2	981.541	0.136156	103.893	0	C1203	77.78	C1203	0.1134
High	EAYDQRQDTV	11	1	1	Q99426		0	3.64143e+06	0.001	0.002074	2.45938	2	1224.55	-0.631953	36.7457	0	C1203	60	A6802	0.51
High	ETAAFIERL	5	1	1	Q5UCC4		0	1.83012e+06	0.001	0.005411	2.45723	2	1049.56	0.259641	69.3791	0	C1203	74.07	A6802	0.0152
High	GKmNPQSAF	5	1	1	P22307	M3(Oxidation)	0	1.75023e+06	0.001	0.004527	2.44947	2	995.461	-0.747701	35.9725	0	C1203	29.63	B1503	0.0163
High	HQFLQNEY	23	1	1	Q16531		0	1.20445e+07	0.001	0.004306	2.44413	2	1078.49	-0.985704	51.8726	0	C1203	43.33	B1503	0.1513
High	SAFPAVQYL	10	1	1	Q13227		0	1.85689e+06	0.001	0.005083	2.44182	2	995.519	-0.419507	88.7045	0	C1203	88.89	C1203	0.0028
High	ETYFESARV	14	1	1	Q9H3L0		0	3.30457e+06	0.001	0.002343	2.43799	2	1101.52	-0.762609	56.5028	0	C1203	70.37	A6802	0.0088
High	YATFIVTNY	6	1	1	Q9HBL8		0	5.1705e+06	0.001	0.004525	2.43048	2	1091.54	-0.431041	82.8057	0	C1203	81.48	C1203	0.1195
High	FAFPLHVDY	9	1	1	Q8TDY4		0	1.53573e+06	0.001	0.002217	2.40807	2	1108.55	-0.486587	86.1819	0	C1203	92.59	C1203	0.0261
High	DIFDAmFSV	1	1	1	P10644	M6(Oxidation)	0	387615	0.001	0.005079	2.40604	2	1060.46	-0.702476	97.8812	0	C1203	44.44	A6802	0.0083
High	EIFDGNVAHI	12	1	1	P46939		0	4.70843e+06	0.001	0.002555	2.40552	2	1114.55	-0.56496	69.7539	0	C1203	31.43	A6802	0.0393
High	YTTTIEAFI	12	1	1	P07814		0	3619620	0.001	0.004552	2.40468	2	1058.54	-0.949412	91.5199	0	C1203	62.96	A6802	0.075
High	ETFNDFVRL	11	1	1	O43913		0	4.49007e+06	0.001	0.004367	2.40281	2	1140.57	-0.895071	80.3777	0	C1203	74.07	A6802	0.019
High	AAFPYGGVL	14	1	1	Q6PCD5		0	2.16803e+06	0.001	0.002845	2.4013	2	894.472	-0.192229	86.3584	0	C1203	92.59	C1203	0.0098
High	MPAFIFEHI	7	1	1	O00560		0	1.35283e+06	0.001	0.004602	2.40123	2	1104.55	-0.6506	90.2507	0	C1203	33.33	A6802	0.7009
High	RQVGATVEF	12	1	1	Q13432		0	4.76532e+06	0.001	0.003037	2.39372	2	1006.53	-0.917029	53.0303	0	C1203	40.74	B1503	0.0032
High	NTIPLFVQL	7	2	2	P35222;P14923		0	1.4239e+07	0.001	0.004378	2.38635	2	1044.61	-0.504815	102.845	0	C1203	77.78	A6802	0.0126
High	FQAPRNPTL	19	1	1	Q8IZW8		0	1.75189e+07	0.001	0.002976	2.38548	2	1043.56	-1.30711	54.9166	0	C1203	55.56	B1503	0.0561
High	DSFNYFINV	11	1	1	Q9NW08		0	1.59673e+06	0.001	0.002096	2.3786	2	1118.51	-0.458817	97.7848	0	C1203	74.07	A6802	0.0663
High	SAIPHPLIm	20	1	1	P61201	M9(Oxidation)	0	5.22107e+06	0.001	0.005074	2.36708	2	994.538	-0.815146	60.7201	0	C1203	81.48	C1203	0.0063
High	EVAELFQRL	10	1	1	Q4V328		0	1.85939e+07	0.001	0.003878	2.3537	2	1104.6	-1.37807	78.0472	0	C1203	44.44	A6802	0.0205
High	RKIPVPANRY	3	1	1	Q9NRX1		0	6.09988e+06	0.001	0.002445	2.34828	3	1213.72	-0.114583	38.0928	0	C1203	31.43	B1503	0.0568
High	GKSSLIVSY	13	1	1	Q96L33		0	5.74153e+06	0.001	0.00534	2.33979	2	953.529	-0.951021	56.2788	0	C1203	51.85	B1503	0.0338
High	AAAPQLLIV	33	1	1	Q10589		0	4.63927e+07	0.001	0.002716	2.33813	2	895.56	-0.927874	87.9916	0	C1203	92.59	C1203	0.2252
High	TVTSVLEYL	14	1	1	O14893		0	3.83077e+06	0.001	0.005155	2.3366	2	1024.56	-0.171292	97.2604	0	C1203	40.74	A6802	0.0717
High	TVISILNTI	5	1	1	O60716		0	776866	0.001	0.0024	2.31692	2	973.592	-0.542881	98.2879	0	C1203	37.04	A6802	0.0184
High	VmAPRTLLL	73	19	19	P30443;P04439;P13746;P30512;P16188;P16189;P10314;P16190;P30455;P30459;Q07000;P04222;P30504;Q9TNN7;Q29963;P30505;P30508;P30510;Q29960	M2(Oxidation)	0	3.41126e+07	0.001	0.002848	2.29915	2	1029.61	-0.0990115	68.5797	0	C1203	55.56	C1203	0.2043
High	YVASNQHEV	9	1	1	Q13127		0	3.10395e+06	0.001	0.005505	2.29445	2	1046.49	-0.594127	32.1295	0	C1203	51.85	A6802	0.0175
High	RLLDTTITF	13	1	1	Q8N766		0	3.26817e+06	0.001	0.003921	2.29422	2	1079.61	-0.599275	79.3827	0	C1203	40.74	B1503	0.0141
High	SQYQGVVVY	17	1	1	Q9Y221		0	7.15214e+07	0.001	0.002975	2.28259	2	1042.52	-1.02309	66.081	0	C1203	51.85	B1503	0.0007
High	GKQQWQQLY	7	1	1	Q7L2H7		0	3.97029e+06	0.001	0.002132	2.27185	2	1178.6	-0.248599	58.1625	0	C1203	37.04	B1503	0.3408
High	KQFGNILIL	11	1	1	P52788		0	8.28912e+06	0.001	0.003349	2.2692	2	1045.64	-0.527068	82.7437	0	C1203	51.85	B1503	0.0291
High	NQVIFPVSY	10	1	1	Q9GZZ1		0	2.57922e+06	0.001	0.004735	2.26517	2	1066.56	-0.449378	85.1099	0	C1203	44.44	B1503	0.0233
High	NAFPEIFYT	21	1	1	Q99570		0	2.86712e+06	0.001	0.002582	2.26054	2	1101.52	-0.200956	93.7564	0	C1203	51.85	A6802	0.2743
High	FIPLPFAEA	10	1	1	Q9C0D2		0	864368	0.001	0.004293	2.2503	2	1004.54	-1.81051	101.423	0	C1203	7.41	A6802	0.2928
High	KHQPHKVTQY	5	2	2	P83881;Q969Q0		0	781074	0.001	0.002643	2.24294	3	1265.67	-0.281748	19.4676	0	C1203	31.43	B1503	0.2984
High	YASDVQLIL	12	1	1	Q8NHQ8		0	1.01294e+07	0.001	0.003491	2.23942	2	1021.56	-1.40083	87.9646	0	C1203	88.89	C1203	0.0293
High	RVYPQAVYF	29	1	1	Q9Y4A5		0	2.75572e+07	0.001	0.00388	2.21867	2	1142.6	-0.890164	68.4412	0	C1203	44.44	C1203	0.0071
High	EAADVWYNL	11	1	1	Q8TAM2		0	2.29783e+06	0.001	0.005555	2.20464	2	1080.5	-0.00917371	86.737	0	C1203	81.48	A6802	0.0283
High	FTAGIVEAVL	14	1	1	Q8IUR0		0	4.55931e+06	0.001	0.004771	2.19595	2	1019.58	-0.573356	95.01	0	C1203	60	A6802	0.2378
High	YAYFNFPEL	3	1	1	Q8IY21		0	172191	0.001	0.00236	2.16388	2	1163.54	0.531253	103.406	0	C1203	85.19	C1203	0.0076
High	FVEWIPNNV	6	8	8	Q9H4B7;Q13885;Q9BVA1;Q13509;P04350;P68371;P07437;Q9BUF5		0	4.5507e+06	0.001	0.004829	2.13952	2	1117.57	-0.587973	89.3308	0	C1203	44.44	A6802	0.1248
High	IVTEIISEI	9	1	1	Q9BPX3		0	5.09905e+06	0.001	0.004807	2.06682	2	1016.59	-0.361571	89.6118	0	C1203	40.74	A6802	0.1107
High	SKYAADRNHY	5	1	1	P67809		0	1.11524e+06	0.001	0.003651	2.02726	3	1224.58	0.0955136	21.1515	0	C1203	31.43	B1503	0.2083
High	FLFDGSPTYV	15	1	1	P49327		0	2.04173e+06	0.001	0.004026	2.01735	2	1145.55	-0.0647461	94.4808	0	C1203	54.29	A6802	0.235
High	YTTDFIYQL	15	1	1	Q01813		0	6.42879e+06	0.001	0.004956	1.85761	2	1163.56	-0.414533	93.0543	0	C1203	77.78	A6802	0.009
High	ISTPVIRTF	12	1	1	Q9NZB2		0	1.24537e+07	0.001	0.004696	1.82868	2	1033.6	-0.874888	68.4653	0	C1203	77.78	C1203	0.0735
High	HVIDLDDATFL	3	1	1	Q8N8R7		0	2.19309e+06	0.001	0.002343	1.66687	2	1258.63	0.246431	86.6845	0		0	A6802	1.319
High	KKVVKETSY	4	1	1	Q9NZJ7		0	474424	0.001	0.003169	1.53756	2	1081.62	-0.273451	19.6163	0	C1203	37.04	B1503	0.0679
High	NIANHFFTV	25	1	1	Q16222		0	6.90667e+06	0.002	0.005895	3.27483	2	1062.54	-0.0683341	74.2688	0	C1203	44.44	A6802	0.0348
High	GKSFGTSSY	1	1	1	A8MT65		0	1.45261e+06	0.002	0.006753	3.25913	2	933.431	0.195818	38.1709	0	C1203	40.74	B1503	0.0574
High	LKSPGSVVF	10	1	1	O75787		0	3.54697e+06	0.002	0.007304	3.22446	2	933.537	-3.19125	60.8726	0	C1203	48.15	B1503	0.01
High	EIVDFAKQV	3	1	1	P55055		0	1.60789e+06	0.002	0.008778	3.2231	2	1048.57	-0.777615	66.3823	0	C1203	44.44	A6802	0.038
High	VASSRSSVL	1	1	1	Q9UPY3		0	932028	0.002	0.008146	3.18009	2	905.505	-0.401979	35.6807	0	C1203	88.89	C1203	0.1667
High	DTSSLFDKL	11	1	1	Q16665		0	1.43685e+06	0.002	0.009939	3.13623	2	1025.51	-0.902587	76.3876	0	C1203	74.07	A6802	0.3375
High	ITADVNHNL	15	1	1	Q16222		0	1.01906e+07	0.002	0.006261	3.12798	2	996.51	-0.92821	46.4399	0	C1203	74.07	A6802	0.0184
High	VAADTVKEL	2	1	1	Q86VI3		0	778344	0.002	0.007807	3.08397	2	945.525	-0.448918	47.3607	0	C1203	96.3	C1203	0.0524
High	KAADIASKV	2	1	1	O95671		0	1.03258e+06	0.002	0.005837	3.06396	2	902.531	-0.0511042	32.9093	0	C1203	81.48	C1203	0.1093
High	VTTDIQVKV	6	1	1	O00267		0	2.58652e+07	0.002	0.007991	3.04405	2	1002.58	-1.61966	57.5415	0	C1203	77.78	A6802	0.0369
High	GAYGQAVRY	20	1	1	Q9UID3		0	8.27374e+06	0.002	0.007809	3.01634	2	984.489	-0.483386	43.9507	0	C1203	85.19	C1203	0.0963
High	AKYPIKQSL	15	1	1	P21283		0	6.23883e+06	0.002	0.00863	2.9924	2	1047.62	-0.644458	41.9437	0	C1203	51.85	B1503	0.0819
High	GKRPGGSTF	10	1	1	O15399		0	1.33861e+07	0.002	0.007921	2.95368	2	906.479	-0.209376	25.6794	0	C1203	40.74	B1503	0.0145
High	KKPPGAQLGF	11	1	1	Q5EBL8		0	2.80225e+06	0.002	0.006494	2.94488	2	1042.6	-0.617623	46.5982	0	C1203	40	B1503	1.5459
High	RQIVSGLKY	1	1	1	Q9NYY3		0	2.44109e+06	0.002	0.006403	2.91261	2	1063.63	0.0101454	48.3606	0	C1203	40.74	B1503	0.0041
High	KQFQSPSTL	16	1	1	Q8NAP3		0	3.79275e+06	0.002	0.006823	2.9113	2	1035.55	-0.51855	46.8014	0	C1203	48.15	B1503	0.0128
High	TTVRVTNSNA	13	3	3	Q15155;Q5JPE7;P69849		0	2.23122e+06	0.002	0.007658	2.9047	2	1062.55	-0.431954	29.3064	0	C1203	20	A6802	1.6273
High	NQKEAVAY	5	1	1	Q03518		0	2.56812e+06	0.002	0.008693	2.90245	2	922.462	-0.555462	32.2089	0	C1203	33.33	B1503	0.557
High	HKVANTSSF	5	1	1	O43683		0	3.02656e+06	0.002	0.007021	2.89311	2	990.5	-0.614717	28.7829	0	C1203	29.63	B1503	0.0176
High	LQAVELQGL	14	1	1	Q96HA7		0	6.04553e+06	0.002	0.008419	2.8641	2	970.556	-0.577321	87.0705	0	C1203	40.74	B1503	1.3403
High	GKVTGDTVY	1	1	1	Q6UX04		0	0	0.002	0.008196	2.86379	2	939.478	-0.74049	36.9405	0	C1203	40.74	B1503	0.0783
High	TKADGTSTY	3	1	1	Q6Q0C0		0	624990	0.002	0.008604	2.86011	2	943.437	-0.180472	23.3442	0	C1203	48.15	B1503	0.0123
High	STFFQETNI	10	1	1	Q8IYN6		0	2.43274e+06	0.002	0.009237	2.84964	2	1086.51	0.0462076	78.668	0	C1203	62.96	A6802	0.1368
High	KKANITFEY	3	1	1	O15372		0	5.30144e+06	0.002	0.009061	2.84905	2	1113.59	-1.9746	49.3124	0	C1203	44.44	B1503	0.0366
High	KKDDAITAY	7	1	1	Q9BY77		0	2.59676e+06	0.002	0.00754	2.83164	2	1024.53	-0.654216	34.5883	0	C1203	44.44	B1503	0.0249
High	EVDATSKYSV	1	1	1	Q9UK61		0	635425	0.002	0.006348	2.82997	2	1098.53	-0.298437	44.695	0	C1203	25.71	A6802	0.4107
High	GQAHPSASY	17	1	1	Q15652		0	2.43277e+06	0.002	0.008416	2.81178	2	917.411	-0.544107	27.8363	0	C1203	40.74	B1503	0.0068
High	SAADGPRVF	2	1	1	Q9Y285		0	1.49252e+06	0.002	0.006183	2.79265	2	919.464	0.511582	48.9672	0	C1203	85.19	C1203	0.0625
High	SIAEVVHQL	1	1	1	O14976		0	1.36718e+06	0.002	0.007995	2.79172	2	995.552	-0.379648	67.0787	0	C1203	48.15	A6802	0.0145
High	GAFGKPSSL	11	1	1	Q8IVT2		0	3.36415e+06	0.002	0.007558	2.76537	2	863.462	-0.124578	48.1177	0	C1203	85.19	C1203	0.0147
High	SQGPTLQF	7	1	1	Q15022		0	3.26923e+06	0.002	0.008873	2.76498	2	877.441	-0.0552589	70.3344	0	C1203	33.33	B1503	0.3176
High	AQRPTEQEL	11	1	1	Q9ULW3		0	4.66255e+06	0.002	0.006128	2.7589	2	1071.54	-0.632148	36.9213	0	C1203	51.85	B1503	0.0976
High	RQAPTGLGL	16	1	1	Q9BX59		0	5.7033e+06	0.002	0.005887	2.75201	2	912.525	-1.02592	51.9133	0	C1203	51.85	B1503	0.0219
High	EVVDKINQV	14	1	1	Q8WXH0		0	7.47859e+06	0.002	0.007837	2.7447	2	1043.57	-0.500076	48.4147	0	C1203	44.44	A6802	0.0052
High	KSFGSAQEF	10	1	1	P35606		0	2.36712e+06	0.002	0.00785	2.74288	2	1000.47	-0.35004	47.2919	0	C1203	70.37	B1503	0.0601
High	THLKPGTLY	24	1	1	Q53EP0		0	1.49399e+07	0.002	0.008617	2.73055	2	1029.57	-1.04745	43.3008	0	C1203	37.04	B1503	0.1918
High	RTTDIVIRI	1	1	1	Q9C0C9		0	1.8432e+06	0.002	0.005646	2.71717	2	1086.66	-0.68306	60.9216	0	C1203	70.37	A6802	0.1854
High	FASTILHLV	7	1	1	P61803		0	2.13266e+06	0.002	0.009207	2.71251	2	1000.58	-0.55213	82.5262	0	C1203	81.48	A6802	0.045
High	TTSAVTVKS	23	1	1	P61513		0	1.94374e+07	0.002	0.007537	2.71198	2	893.493	-0.601648	28.7761	0	C1203	37.04	A6802	1.5634
High	DVSNVIEKV	11	1	1	O94955		0	81068366	0.002	0.007606	2.70524	2	1002.55	-0.642593	61.322	0	C1203	44.44	A6802	0.0314
High	LAAPVISVL	8	1	1	O60337		0	8.7023e+06	0.002	0.008192	2.70115	2	882.566	-0.237799	93.3139	0	C1203	92.59	C1203	0.0085
High	AKINEIRQm	4	1	1	Q15366	M9(Oxidation)	0	1.06781e+06	0.002	0.009585	2.69762	2	1118.6	-1.01424	30.2688	0	C1203	40.74	B1503	0.0761
High	EINKELNQV	5	1	1	Q14683		0	1.76948e+06	0.002	0.009865	2.69258	2	1086.58	-1.10891	45.8848	0	C1203	37.04	A6802	0.1445
High	QKVLPVGVLY	6	1	1	Q03393		0	1.11679e+06	0.002	0.006744	2.66011	2	1115.68	-0.266084	75.1951	0	C1203	37.14	B1503	0.6775
High	SQFKGYFIF	11	1	1	Q9NY27		0	2.60438e+06	0.002	0.007001	2.65944	2	1136.58	-0.518579	86.7162	0	C1203	33.33	B1503	0.0094
High	SQSGLVHIW	3	1	1	Q9BYB4		0	35385.6	0.002	0.006006	2.65172	2	1026.54	-0.54639	70.8954	0	C1203	11.11	B1503	0.3725
High	GKTDPGTVF	10	1	1	Q9NYK5		0	2.19032e+06	0.002	0.006219	2.65154	2	921.468	-0.168687	46.9496	0	C1203	37.04	B1503	0.0438
High	SSYGGTLRY	2	1	1	O15230		0	1.49387e+06	0.002	0.00945	2.65045	2	1003.49	1.04422	48.7765	0	C1203	77.78	C1203	0.0108
High	ETIETINQL	8	1	1	Q96GM5		0	3.48781e+06	0.002	0.008806	2.6502	2	1060.55	-0.758257	70.737	0	C1203	74.07	A6802	0.0071
High	QAIGAIRTL	1	1	1	Q9H7E9		0	1.14528e+06	0.002	0.009354	2.6438	2	942.573	0.0927791	58.6792	0	C1203	88.89	C1203	0.026
High	EAIDFIDSI	16	1	1	P28562		0	5.13504e+06	0.002	0.008643	2.63929	2	1022.5	-0.641301	95.2831	0	C1203	74.07	A6802	0.0194
High	HVGDIIKEV	24	2	2	Q14168;Q9NZW5		0	1.21763e+07	0.002	0.006538	2.63914	2	1009.57	-1.25544	53.9134	0	C1203	51.85	A6802	0.0853
High	EVFQGVEKL	17	1	1	Q9Y330		0	7.82589e+06	0.002	0.007574	2.6191	2	1048.57	-0.777615	63.7145	0	C1203	44.44	A6802	0.0422
High	GTYFNPHTV	5	1	1	O60294		0	5.95109e+06	0.002	0.008459	2.61905	2	1035.49	-0.720665	54.0544	0	C1203	77.78	A6802	0.1452
High	GQRFLEVQY	1	1	1	Q15149		0	1.57531e+06	0.002	0.007433	2.61433	2	1139.58	0.193953	65.6217	0	C1203	40.74	B1503	0.0855
High	GQTGAGKSY	5	3	3	Q12756;O60333;O43896		0	908680	0.002	0.005676	2.61425	2	868.416	-0.011684	19.1768	0	C1203	44.44	B1503	0.0198
High	SAADVVVVH	4	1	1	P09110		0	1.07282e+06	0.002	0.007542	2.60152	2	896.483	-0.637463	46.0222	0	C1203	55.56	C1203	1.6159
High	YQKQPTIF	4	1	1	P62280		0	2.3745e+06	0.002	0.008156	2.60025	2	1024.54	-1.35074	55.3459	0	C1203	43.33	B1503	0.1264
High	FASHVSPEV	17	1	1	Q9NP61		0	39986948	0.002	0.005618	2.59867	2	972.478	-0.123547	48.0244	0	C1203	85.19	A6802	0.0842
High	HAAELIKTV	6	1	1	Q8WUM4		0	2.74207e+06	0.002	0.00751	2.58154	2	981.572	-0.310696	43.8865	0	C1203	92.59	A6802	0.0764
High	SAAGFPIRV	7	1	1	Q96H55		0	4.00637e+06	0.002	0.005702	2.57651	2	917.52	-0.209368	67.3046	0	C1203	88.89	A6802	0.0336
High	EVFDEKIEV	4	1	1	Q02952		0	2.09611e+06	0.002	0.005674	2.5723	2	1107.56	-0.624219	67.9224	0	C1203	51.85	A6802	0.0047
High	EIYSESHRV	10	1	1	Q96I51		0	7.20853e+06	0.002	0.006056	2.56486	2	1119.54	-2.33176	34.4563	0	C1203	44.44	A6802	0.0266
High	DVIGQTITI	7	1	1	Q6UN15		0	566781	0.002	0.008515	2.5554	2	959.541	-0.330776	83.6867	0	C1203	40.74	A6802	0.0372
High	HTFYNELRV	7	10	10	Q562R1;Q9BYX7;P60709;P68032;P63261;P68133;Q6S8J3;A5A3E0;P0CG38;P0CG39		0	3.97029e+06	0.002	0.008204	2.5488	2	1178.6	0.269264	58.4043	0	C1203	74.07	A6802	0.0419
High	ELFTGFIKV	10	1	1	Q86TM6		0	3.1247e+06	0.002	0.009318	2.5436	2	1053.6	-0.823657	88.1034	0	C1203	44.44	A6802	0.114
High	KKAHLGTAL	1	1	1	P62266		0	946069	0.002	0.008514	2.54189	2	938.578	-0.116918	27.8631	0	C1203	40.74	B1503	0.1968
High	KQWETQPGF	1	1	1	Q9UI26		0	1.19204e+06	0.002	0.007094	2.53894	2	1120.54	-1.04242	55.0728	0	C1203	33.33	B1503	0.0227
High	TVADKIHSV	10	1	1	O95147		0	5.20191e+06	0.002	0.006142	2.53048	2	969.536	-0.741767	38.364	0	C1203	48.15	A6802	0.0033
High	QKYAGKDGY	13	1	1	P31949		0	3.4489e+06	0.002	0.007905	2.52907	2	1029.5	-0.794749	24.9103	0	C1203	40.74	B1503	0.2254
High	STLFLPHYA	8	1	1	Q5T447		0	1.89367e+06	0.002	0.005843	2.52745	2	1048.55	-0.737731	71.8354	0	C1203	33.33	A6802	0.5246
High	EGIDFYTSI	7	3	3	P34931;P08107;P11142		0	7.55783e+06	0.002	0.007463	2.51929	2	1044.49	-0.701591	88.949	0	C1203	33.33	A6802	0.2987
High	ETIESINQL	10	2	2	Q92925;Q6STE5		0	5.30407e+06	0.002	0.006865	2.5094	2	1046.54	-0.861165	70.6459	0	C1203	74.07	A6802	0.0076
High	AKNKDQGTY	1	1	1	P60660		0	422781	0.002	0.008423	2.50871	2	1024.51	-0.402738	17.055	0	C1203	44.44	B1503	0.1094
High	RSCLPKLLL	1	1	1	Q96QU8		0	0	0.002	0.00585	2.50283	2	1042.64	-1.04283	93.1001	0	C1203	70.37	C1203	3.2823
High	TSYPDPILL	12	1	1	P50591		0	4.55524e+06	0.002	0.007984	2.49809	2	1018.55	-0.0515538	90.1085	0	C1203	85.19	C1203	0.0431
High	LTPSHIKAY	4	1	1	P50613		0	4.40032e+06	0.002	0.009941	2.49315	2	1029.57	-0.573196	39.712	0	C1203	77.78	C1203	0.6321
High	EASAVIQGL	14	1	1	Q8IWA0		0	3.10562e+07	0.002	0.007383	2.46472	2	887.483	-0.0657694	69.423	0	C1203	81.48	A6802	0.075
High	FAIPLIEKL	4	1	1	Q9NR30		0	719817	0.002	0.007036	2.46294	2	1043.65	-0.517069	94.1428	0	C1203	88.89	C1203	0.0276
High	TVADVDEKA	8	1	1	Q13118		0	4.24391e+06	0.002	0.007103	2.44489	2	947.467	-0.650655	33.2444	0	C1203	7.41	A6802	0.1722
High	ITFPGIKLI	1	1	1	O75387		0	407187	0.002	0.007289	2.44361	2	1001.64	-0.162244	91.7309	0	C1203	77.78	C1203	0.1062
High	SSFPRFYFV	5	1	1	Q14204		0	1.52413e+06	0.002	0.009931	2.41092	2	1149.57	-0.415873	87.5863	0	C1203	77.78	A6802	0.0816
High	TAYPQVVVV	32	1	1	Q9ULI2		0	4.24015e+07	0.002	0.006361	2.40996	2	975.551	-0.479347	76.9191	0	C1203	96.3	C1203	0.008
High	VALNFIISY	6	2	2	P50616;Q14106		0	1.72468e+06	0.002	0.00925	2.40615	2	1039.58	-0.439207	100.182	0	C1203	85.19	C1203	0.0706
High	ETTSISKITV	15	1	1	P51587		0	8.025e+06	0.002	0.00954	2.40067	2	1078.6	-0.588754	56.0793	0	C1203	40	A6802	0.1046
High	DAANVLLQL	8	1	1	Q7Z6Z7		0	1.00101e+06	0.002	0.007533	2.38992	2	956.541	-0.559644	95.4663	0	C1203	81.48	A6802	0.2502
High	TTFPRPVTV	39	1	1	Q15233		0	2.5985e+08	0.002	0.006714	2.36391	2	1017.57	-2.81892	60.9389	0	C1203	88.89	A6802	0.0056
High	TAAPPAQPL	15	1	1	P25440		0	6.54495e+06	0.002	0.006875	2.36231	2	865.477	-0.999438	51.6532	0	C1203	85.19	C1203	0.1455
High	EATDVKSTL	8	1	1	Q9NZM1		0	6.01345e+06	0.002	0.00957	2.33116	2	963.499	-0.364607	39.9293	0	C1203	81.48	A6802	0.3015
High	NTTDIFQTV	36	1	1	P37802		0	5.39931e+08	0.002	0.009643	2.3274	2	1038.51	-1.00955	78.0929	0	C1203	74.07	A6802	0.0045
High	DIATILSKV	9	1	1	Q8NG31		0	2.14298e+06	0.002	0.008585	2.30808	2	959.577	-0.407966	86.4387	0	C1203	40.74	A6802	0.0368
High	HTAIGAHPV	9	1	1	Q92567		0	4.50487e+06	0.002	0.008556	2.29414	2	902.484	-0.350086	31.1357	0	C1203	70.37	A6802	0.032
High	AIAPIIAAV	18	1	1	Q9BQ52		0	7.00074e+06	0.002	0.008704	2.2739	2	838.54	0.0717741	87.3207	0	C1203	55.56	A6802	0.022
High	EIFQKPFQTL	16	1	1	Q6DD88		0	3.6919e+06	0.002	0.009065	2.27295	2	1250.68	-0.370573	75.3288	0	C1203	40	A6802	0.91
High	AAQPQPSVA	20	1	1	Q96KR1		0	3.80934e+07	0.002	0.008869	2.26084	2	868.452	-0.319343	37.4377	0	C1203	55.56	C1203	2.9014
High	TVARPSVPA	38	1	1	P08174		0	3.65262e+08	0.002	0.006395	2.25744	2	897.515	-0.86725	41.3737	0	C1203	7.41	A6802	0.2629
High	EAFDRSFEV	24	1	1	Q7Z4W1		0	5.40106e+07	0.002	0.009718	2.24194	2	1099.5	-0.870483	65.4778	0	C1203	85.19	A6802	0.0048
High	FTYGAVVHY	3	1	1	Q96PZ7		0	955164	0.002	0.009416	2.22354	2	1056.51	-1.13754	64.9909	0	C1203	85.19	C1203	0.0087
High	ESSPFVERL	20	1	1	P14625		0	2.65638e+07	0.002	0.007485	2.22021	2	1063.54	-1.13234	63.2724	0	C1203	81.48	A6802	0.1754
High	EGAAVFWNV	8	1	1	Q9NWS8		0	2.75591e+06	0.002	0.006401	2.1959	2	992.484	-0.155397	89.4294	0	C1203	40.74	A6802	0.23
High	SQVPRSSSm	15	1	1	Q9H992	M9(Oxidation)	0	1.19698e+06	0.002	0.006375	2.17833	2	994.462	-0.24496	21.063	0	C1203	37.04	B1503	0.0134
High	EIVQFFSGL	4	3	3	P31943;P55795;P52597		0	819644	0.002	0.009183	2.15507	2	1039.54	-1.38533	101.628	0	C1203	37.04	A6802	0.1446
High	RQYGTISH	9	1	1	Q06481		0	2.74416e+06	0.002	0.009037	2.151	2	961.485	0.139077	25.3411	0	C1203	0	B1503	0.8309
High	RTYPVEILY	10	1	1	Q14562		0	5.13224e+06	0.002	0.009844	2.14576	2	1153.62	-0.776789	73.2474	0	C1203	81.48	C1203	0.0382
High	ETIPGPDAKV	23	1	1	Q8TDP1		0	3.43912e+07	0.002	0.008271	2.13573	2	1026.55	-1.29134	50.459	0	C1203	48.57	A6802	0.0331
High	YTIPPGHQV	58	1	1	Q16850		0	2.60931e+07	0.002	0.008478	2.13399	2	1011.53	0.2148	48.8054	0	C1203	77.78	A6802	0.0029
High	ETADVIAKV	35	1	1	O43617		0	2.56053e+08	0.002	0.009196	2.0861	2	945.524	-1.09443	52.0684	0	C1203	77.78	A6802	0.0012
High	ETFKNSFVEA	16	1	1	Q6NUM9		0	1.12941e+07	0.002	0.006026	2.02376	2	1171.56	-0.20448	57.7523	0	C1203	25.71	A6802	0.2715
High	TVVEFPIRGL	8	1	1	Q13107		0	959990	0.002	0.007313	1.99017	2	1130.66	0.455427	83.5416	0	C1203	31.43	A6802	0.2322
High	TTILIPYHI	9	1	1	Q6IQ26		0	1.78561e+06	0.002	0.007838	1.98076	2	1070.62	-0.383201	81.8922	0	C1203	62.96	A6802	0.0369
High	DTADQVIASFKV	1	1	1	O43707		0	647892	0.002	0.007529	1.95007	2	1293.67	-0.0515356	84.0284	0		0	A6802	0.8168
High	EVGPPLPPLL	12	1	1	Q9Y2F5		0	2.84997e+06	0.002	0.008408	1.95006	2	1031.61	-0.0468302	100.198	0	C1203	42.86	A6802	0.7259
High	FAFPGSTNSL	5	1	1	P16144		0	1.36247e+06	0.002	0.00895	1.70283	2	1040.5	-0.443285	82.068	0	C1203	82.86	C1203	0.0393
High	ETIFGEWTV	14	1	1	Q96MT1		0	1.34987e+07	0.002	0.005725	1.59909	2	1081.52	-0.483071	99.0745	0	C1203	70.37	A6802	0.0087
High	ETAPRTIFQRV	3	1	1	Q9UBB4		0	1.51696e+07	0.002	0.006231	1.57535	3	1317.73	-0.116307	55.5934	0		0	A6802	0.5705
High	TVFSHAQTV	24	2	2	Q71UM5;P42677		0	4.88106e+07	0.003	0.009954	3.06266	2	989.504	-1.34467	45.5034	0	C1203	48.15	A6802	0.0314
High	TASPLVKSV	21	1	1	Q6P4F7		0	1.22983e+07	0.003	0.0132	3.02553	2	901.535	-0.298958	46.5124	0	C1203	92.59	A6802	0.2616
High	GKNEVTLEF	8	1	1	Q08945		0	3.86193e+06	0.003	0.01119	2.99198	2	1036.53	-1.48067	64.0345	0	C1203	40.74	B1503	0.0293
High	VKIAGGTSL	3	1	1	Q9H6T0		0	1.3038e+06	0.003	0.01068	2.95507	2	845.509	0.000635157	48.4567	0	C1203	40.74	B1503	0.0432
High	SVSSVVHYL	2	1	1	Q9NRL2		0	3.46961e+06	0.003	0.01269	2.9451	2	990.525	-0.176822	65.516	0	C1203	48.15	A6802	0.0169
High	VmAPRTLVL	98	9	9	P01892;P30447;P05534;P18462;P30450;P30456;P30457;P01891;P10316	M2(Oxidation)	0	6.35864e+07	0.003	0.01339	2.88837	2	1015.6	-0.436349	66.9209	0	C1203	59.26	C1203	0.129
High	GQTGTGKTY	5	3	3	O15066;O14782;Q96AC6		0	799747	0.003	0.01363	2.87295	2	912.442	-0.106417	20.8734	0	C1203	48.15	B1503	0.0206
High	QERPSVTSY	12	1	1	Q9UJX3		0	7.80938e+06	0.003	0.01104	2.87118	2	1066.52	-0.559421	40.706	0	C1203	48.15	B1503	0.0243
High	GKAFSQKQY	7	1	1	Q15072		0	1.24242e+06	0.003	0.01186	2.85591	2	1056.55	-0.936119	27.1971	0	C1203	44.44	B1503	0.2767
High	FTSQVIRNL	2	1	1	Q14204		0	1.7405e+06	0.003	0.01026	2.84666	2	1077.6	-1.14315	63.1235	0	C1203	81.48	C1203	0.1727
High	GKVPVVVSY	2	1	1	Q9Y4C4		0	2.56632e+06	0.003	0.01006	2.81273	2	947.555	-1.29188	58.0987	0	C1203	51.85	B1503	0.0084
High	AKFSRPAQL	8	1	1	P22314		0	4.35697e+06	0.003	0.01016	2.80829	2	1017.58	-0.728931	41.5504	0	C1203	51.85	B1503	0.2105
High	LQKANQEQY	5	1	1	Q9UBU8		0	882445	0.003	0.0119	2.80705	2	1121.56	-0.173056	29.8017	0	C1203	37.04	B1503	0.0391
High	HKIEAGNEF	14	1	1	O43293		0	6.94365e+06	0.003	0.01237	2.79509	2	1044.51	-0.719826	36.4198	0	C1203	37.04	B1503	0.0147
High	ARAGVVLEm	1	1	1	Q9UKP3	M9(Oxidation)	0	1.69661e+06	0.003	0.01353	2.77645	2	961.514	0.0646258	43.6131	0	C1203	51.85	B1503	0.1346
High	AKAGGFVVGY	3	1	1	Q9HAV4		0	1.78116e+06	0.003	0.01015	2.76817	2	968.52	-0.288425	58.8239	0	C1203	40	B1503	0.1049
High	ETSSImQKL	15	1	1	Q5VT06	M6(Oxidation)	0	4.4674e+06	0.003	0.01361	2.76342	2	1052.53	-0.756577	41.9714	0	C1203	74.07	A6802	0.0607
High	AQAPAQSQF	6	1	1	Q92793		0	3.81586e+06	0.003	0.01213	2.75528	2	947.458	-0.047341	44.9026	0	C1203	44.44	B1503	0.0022
High	GKVRTDITY	34	1	1	P62701		0	5.45235e+07	0.003	0.0116	2.74782	2	1052.57	-1.37968	38.8956	0	C1203	44.44	B1503	0.128
High	MASALVHIL	13	1	1	Q5VWQ8		0	1.88349e+06	0.003	0.0118	2.70851	2	954.544	-0.10199	76.5903	0	C1203	81.48	C1203	0.1674
High	SVAQGTTNV	5	1	1	P46013		0	2.22028e+06	0.003	0.01134	2.70352	2	876.441	-0.818596	36.9147	0	C1203	40.74	A6802	0.0234
High	LKPGMVVTF	12	2	2	P68104;Q5VTE0		0	2.95032e+06	0.003	0.01261	2.68512	2	991.564	-0.861299	71.7416	0	C1203	44.44	B1503	0.3724
High	VQENGQRKY	2	2	2	Q9NQ94;A0AV96		0	771276	0.003	0.01152	2.66287	2	1121.57	-0.290391	15.3113	0	C1203	44.44	B1503	0.1024
High	KASPLTFTV	23	1	1	P09884		0	1.51972e+07	0.003	0.01088	2.65143	2	963.551	0.0110572	67.8066	0	C1203	88.89	C1203	0.1183
High	AAYYHPSYL	18	1	1	Q14687		0	9.2703e+06	0.003	0.01306	2.64465	2	1084.51	-0.120005	59.8462	0	C1203	85.19	C1203	0.0061
High	FVFPGELLL	5	1	1	Q15758		0	4.34015e+06	0.003	0.01217	2.63175	2	1034.59	-0.414556	107.994	0	C1203	55.56	C1203	0.0124
High	EAADIIQKL	11	1	1	O00471		0	5.55733e+06	0.003	0.01151	2.63105	2	1000.57	0.0390891	65.9275	0	C1203	85.19	A6802	0.0324
High	LSFPYSYEV	4	1	1	Q53EP0		0	718237	0.003	0.01219	2.62966	2	1104.52	-0.767679	88.7718	0	C1203	81.48	A6802	0.1829
High	SQARTLITF	5	1	1	Q8N1F7		0	2.76964e+06	0.003	0.01101	2.62046	2	1036.58	-0.658746	66.9244	0	C1203	40.74	B1503	0.0095
High	YKKGKDSLY	11	2	2	P83881;Q969Q0		0	1.39325e+06	0.003	0.01221	2.60021	2	1101.59	-0.32484	26.2696	0	C1203	44.44	B1503	0.1869
High	GAYEQVIKY	12	1	1	P98194		0	1.39199e+07	0.003	0.01178	2.59622	2	1070.55	-0.254168	58.0119	0	C1203	88.89	C1203	0.0474
High	ISRETGEPY	2	1	1	Q04637		0	1.30001e+06	0.003	0.01093	2.58671	2	1051.5	-0.891199	37.0558	0	C1203	70.37	B1503	0.684
High	FAFEEAIGY	2	1	1	Q96G03		0	866970	0.003	0.01224	2.57359	2	1046.48	-0.139147	88.3988	0	C1203	88.89	C1203	0.0291
High	SQFPQPQHF	2	1	1	Q9P215		0	2.68168e+06	0.003	0.01061	2.56707	2	1115.53	-0.873843	56.6027	0	C1203	44.44	B1503	0.0011
High	QASPFVLRA	3	1	1	Q9BUE0		0	0	0.003	0.0117	2.52142	2	988.557	-0.627147	62.8788	0	C1203	55.56	A6802	0.7658
High	TTATVTTTQA	6	1	1	Q01844		0	1.83154e+06	0.003	0.01295	2.47563	2	994.505	-0.232165	36.2677	0	C1203	20	A6802	0.4631
High	EVFGHAIKA	15	1	1	P54136		0	2.04265e+07	0.003	0.01321	2.46883	2	971.53	-0.512792	44.8445	0	C1203	11.11	A6802	0.0322
High	LQAPPLTSL	13	1	1	Q96EX3		0	2.20813e+06	0.003	0.01021	2.45262	2	939.551	-0.508357	81.2705	0	C1203	48.15	B1503	0.0282
High	DIYSKFDVI	5	2	2	P54619;Q9UGJ0		0	1.68608e+06	0.003	0.01101	2.4428	2	1099.57	0.0208267	81.6162	0	C1203	40.74	A6802	0.7913
High	AAFPGASLY	7	1	1	Q15038		0	3.24242e+06	0.003	0.0102	2.42339	2	896.451	-0.205138	77.4531	0	C1203	88.89	C1203	0.0078
High	ETQNVVTKV	12	1	1	Q96MW1		0	1.40902e+07	0.003	0.01204	2.42226	2	1017.55	-2.69781	39.6632	0	C1203	70.37	A6802	0.0281
High	EAIGNPHHV	8	1	1	Q14146		0	9.80956e+06	0.003	0.01344	2.4095	2	973.485	-0.322065	28.033	0	C1203	81.48	A6802	0.0442
High	FGVDRAILY	7	1	1	P06756		0	4.0383e+06	0.003	0.0113	2.39083	2	1053.57	-1.04258	72.3896	0	C1203	48.15	C1203	0.0963
High	ESAGLGYRV	13	1	1	Q63HN8		0	5.62756e+06	0.003	0.0119	2.37485	2	951.487	-2.21654	49.9523	0	C1203	74.07	A6802	0.0202
High	ETIPSEIQV	7	1	1	Q15646		0	3.4081e+06	0.003	0.01143	2.31702	2	1015.53	-0.695671	72.3827	0	C1203	77.78	A6802	0.0062
High	KKLQQTQEY	4	2	2	P42229;P51692		0	939388	0.003	0.01352	2.3064	2	1165.62	-0.0428538	26.149	0	C1203	40.74	B1503	0.0331
High	AAYPEIVAV	20	1	1	Q17RS7		0	4.29928e+06	0.003	0.0111	2.30372	2	932.508	-0.747512	78.9909	0	C1203	96.3	C1203	0.0061
High	KAYANPTVV	3	1	1	Q86XK2		0	2.97279e+07	0.003	0.01274	2.28696	2	962.53	-0.597841	43.9277	0	C1203	85.19	C1203	0.0129
High	YGFPSPIFL	1	1	1	Q76EJ3		0	593365	0.003	0.01352	2.22426	2	1040.54	-0.672828	106.554	0	C1203	59.26	C1203	0.0228
High	ETADVKASV	8	1	1	Q8N1F7		0	1.29528e+07	0.003	0.01334	2.21596	2	919.473	-0.420258	36.7729	0	C1203	74.07	A6802	0.0022
High	ESAPIGIRV	11	1	1	O75054		0	5.3805e+06	0.003	0.01234	2.20755	2	941.541	-0.670371	60.9231	0	C1203	81.48	A6802	0.0083
High	FTFDQDPSVL	4	1	1	Q9UBN7		0	565487	0.003	0.01059	2.14684	2	1168.55	0.0345061	86.1112	0	C1203	77.14	A6802	0.4613
High	EASYLITSV	15	1	1	O60488		0	3.47149e+07	0.003	0.01301	2.10431	2	982.509	-0.599261	76.5484	0	C1203	81.48	A6802	0.0329
High	ESFGNEIYTV	3	1	1	O43148		0	1.82342e+06	0.003	0.01104	2.10372	2	1158.53	-0.0722477	76.4701	0	C1203	57.14	A6802	0.0634
High	TPFTGPFISV	2	1	1	Q05DH4		0	1.00695e+06	0.003	0.01123	2.03638	2	1065.56	-0.229367	95.271	0	C1203	40	A6802	1.3628
High	TQAPIFISF	5	1	1	Q15070		0	1.15146e+06	0.003	0.01256	2.02751	2	1023.55	-0.64553	98.3509	0	C1203	44.44	B1503	0.0037
High	DTFSGQFVL	12	1	1	Q5T089		0	4.06949e+06	0.003	0.01101	1.99083	2	1013.49	-0.0584978	91.7758	0	C1203	77.78	A6802	0.0629
High	QSVDLVFPV	7	1	1	Q9NQ31		0	3.01316e+07	0.003	0.01082	1.8591	2	1003.55	-0.644366	94.8143	0	C1203	74.07	A6802	0.1091
High	SKKIDRHmY	1	1	1	P84098	M8(Oxidation)	0	828745	0.003	0.0103	1.68992	2	1193.61	-0.247796	15.7328	0	C1203	37.04	B1503	0.5279
High	GQRKGAGSVF	34	1	1	P62917		0	3.43879e+07	0.004	0.01489	3.30961	2	1006.54	-4.0797	30.648	0	C1203	42.86	B1503	0.0549
High	AKLKGIGEY	9	1	1	Q92620		0	2.7728e+06	0.004	0.01479	3.15316	2	978.561	-0.586989	41.7265	0	C1203	48.15	B1503	0.0283
High	DATNILNKL	3	1	1	Q99832		0	1.77488e+06	0.004	0.01455	2.9853	2	1001.56	-0.81485	72.6889	0	C1203	74.07	A6802	0.7505
High	SKLKNGLTF	3	1	1	Q6ZSZ5		0	1.97749e+06	0.004	0.01751	2.98387	2	1007.59	-0.388061	47.0862	0	C1203	37.04	B1503	0.0212
High	SVTQIYHAV	6	1	1	P04844		0	6.09474e+06	0.004	0.01491	2.86202	2	1017.54	-0.987038	54.4136	0	C1203	37.04	A6802	0.0354
High	SVADTVARV	13	1	1	Q9NYY3		0	5.66462e+06	0.004	0.01643	2.81752	2	917.505	-0.407621	49.0414	0	C1203	48.15	A6802	0.0055
High	GKLVQIEY	28	1	1	P25787		0	2.52365e+07	0.004	0.0142	2.80943	2	949.536	0.305196	59.8572	0	C1203	36.67	B1503	1.737
High	HQKLGIAY	8	1	1	Q9HB58		0	5.23123e+06	0.004	0.01605	2.77952	2	929.52	0.0225985	43.9712	0	C1203	36.67	B1503	0.1127
High	DAARAIAGV	7	1	1	O75821		0	3.71133e+06	0.004	0.01459	2.73016	2	843.469	0.384399	48.8968	0	C1203	81.48	A6802	0.0326
High	EVFGLFQKL	7	1	1	P15924		0	2.14798e+06	0.004	0.01583	2.72935	2	1080.61	-1.06207	88.0107	0	C1203	44.44	A6802	0.05
High	YSSPVNSSA	3	1	1	O14964		0	1.79299e+06	0.004	0.01665	2.72782	2	911.409	-1.95554	41.2664	0	C1203	44.44	A6802	0.2884
High	SAADIPINI	12	1	1	P21333		0	5.23652e+06	0.004	0.01671	2.68035	2	913.499	-0.358523	81.0485	0	C1203	81.48	A6802	0.0244
High	TAVALLRLL	1	1	1	Q14165		0	424508	0.004	0.01544	2.66849	2	969.645	-0.404374	92.3628	0	C1203	77.78	C1203	0.5334
High	SVAPSSTNV	9	1	1	P46379		0	3.91465e+06	0.004	0.01684	2.66111	2	861.431	-0.082836	41.4246	0	C1203	48.15	A6802	0.019
High	AQPPVGAAY	1	1	1	Q96SN8		0	2.2646e+06	0.004	0.01619	2.6429	2	873.446	-0.781869	50.9642	0	C1203	48.15	B1503	0.0055
High	QKLIFTVGY	2	1	1	Q8TDB6		0	513070	0.004	0.01508	2.63074	2	1068.61	-0.598352	75.0068	0	C1203	40.74	B1503	0.606
High	GQNAQTmAY	27	1	1	O75534	M7(Oxidation)	0	6.29626e+06	0.004	0.01548	2.59727	2	999.42	-0.4533	36.2953	0	C1203	37.04	B1503	0.0083
High	EIIQRIENV	7	1	1	Q9H074		0	3.15013e+06	0.004	0.01599	2.59288	2	1113.62	-1.56425	60.8878	0	C1203	40.74	A6802	0.0496
High	QQALHTVQY	9	1	1	Q5SRE5		0	4.05704e+06	0.004	0.01384	2.57501	2	1087.55	-0.518105	45.5778	0	C1203	44.44	B1503	0.0075
High	EVSNIVKEA	13	1	1	P63172		0	6.29023e+06	0.004	0.01568	2.57046	2	988.531	-0.19421	44.6912	0	C1203	14.81	A6802	0.2185
High	KATNVVRLL	8	1	1	Q9NYU1		0	7.37466e+06	0.004	0.01421	2.54707	2	1013.65	-0.89063	53.0242	0	C1203	81.48	C1203	0.229
High	GQYPVFNQY	8	1	1	Q96DN5		0	1.2507e+06	0.004	0.01514	2.5377	2	1115.52	-0.199766	71.9828	0	C1203	48.15	B1503	0.0022
High	RQLPSSHAL	8	1	1	Q8WV83		0	8.18198e+06	0.004	0.01475	2.52265	2	1008.56	-0.929594	36.1873	0	C1203	44.44	B1503	0.015
High	SAAPLPLYT	12	1	1	P56524		0	3623453	0.004	0.01399	2.51598	2	932.509	-0.278619	75.2408	0	C1203	55.56	A6802	1.4782
High	EAFHYIFNV	28	1	1	Q9UEY8		0	6.19174e+07	0.004	0.01648	2.51474	2	1139.55	0.105587	83.4826	0	C1203	81.48	A6802	0.0266
High	EAVSFQHFI	10	1	1	Q99598		0	2.25175e+06	0.004	0.01426	2.50926	2	1077.54	-0.554134	75.6461	0	C1203	70.37	A6802	0.0811
High	DVFSPSHAI	4	1	1	Q8WU67		0	2.74143e+06	0.004	0.01543	2.46578	2	972.478	-0.562884	62.9864	0	C1203	37.04	A6802	0.016
High	GKHQPHKVTQY	15	2	2	P83881;Q969Q0		0	2.96728e+06	0.004	0.01517	2.45866	3	1322.7	-0.028011	19.2688	0		0	B1503	1.4107
High	KLFIGGLSF	5	4	4	Q32P51;P09651;P22626;P51991		0	1.01804e+06	0.004	0.01707	2.45057	2	981.576	-0.561129	89.4502	0	C1203	37.04	B1503	0.0119
High	HQIKSLQY	7	1	1	Q9NW82		0	7.12564e+06	0.004	0.01538	2.43991	2	1016.55	-0.856882	38.4617	0	C1203	26.67	B1503	0.0968
High	FAVGVQQVL	5	1	1	O95373		0	910589	0.004	0.01611	2.43414	2	960.551	-0.27933	83.1757	0	C1203	85.19	C1203	0.0462
High	EVAGIINDA	16	1	1	Q14008		0	1.62196e+07	0.004	0.0141	2.42961	2	901.462	-0.292223	61.9448	0	C1203	11.11	A6802	0.0324
High	EAINIIQGI	1	1	1	Q9NR81		0	5.21424e+06	0.004	0.01544	2.42109	2	970.556	-0.640208	87.1574	0	C1203	70.37	A6802	0.0326
High	ETSDILQRV	11	1	1	Q14164		0	7711405	0.004	0.01562	2.4157	2	1060.56	-0.0766379	58.8638	0	C1203	74.07	A6802	0.0048
High	DLIHEIYTV	8	1	1	P18124		0	1.90813e+06	0.004	0.01685	2.38358	2	1102.58	-0.556146	86.5439	0	C1203	44.44	A6802	0.2239
High	NISQVIAVV	3	1	1	P24928		0	3.4962e+06	0.004	0.01714	2.36178	2	942.562	-0.415144	83.7833	0	C1203	48.15	A6802	0.1287
High	VmINKATPY	4	1	1	O95167	M2(Oxidation)	0	1.93623e+06	0.004	0.01514	2.32097	2	1052.54	-0.980169	46.7128	0	C1203	40.74	B1503	0.1499
High	IKPDGLLEF	4	1	1	Q15345		0	2.33742e+06	0.004	0.01426	2.30919	2	1031.58	-0.625853	79.2166	0	C1203	40.74	B1503	0.2297
High	KEYERAIIF	8	1	1	P27105		0	2.74556e+06	0.004	0.01399	2.30855	2	1168.64	0.334499	58.3468	0	C1203	40.74	B1503	0.0077
High	GQNKKVmIY	41	2	2	Q14839;Q8TDI0	M7(Oxidation)	0	1.31872e+07	0.004	0.01733	2.29628	2	1096.58	-0.917474	34.2508	0	C1203	40.74	B1503	0.0144
High	ETVGILHKV	8	1	1	Q96HH9		0	1.35775e+07	0.004	0.01454	2.27137	2	995.588	-0.51535	48.036	0	C1203	70.37	A6802	0.0023
High	SAYAQIVQF	20	1	1	Q9Y4W6		0	1.34567e+07	0.004	0.0144	2.266	2	1026.52	-0.537111	81.4136	0	C1203	77.78	C1203	0.0098
High	ETFGQYPLQV	4	1	1	Q96RU2		0	1.17907e+06	0.004	0.01593	2.2596	2	1181.58	-1.31212	83.2179	0	C1203	60	A6802	0.0475
High	ITAPPTPGI	1	1	1	Q8NEZ4		0	4.03663e+06	0.004	0.01611	2.19899	2	866.498	-0.239887	67.3114	0	C1203	70.37	A6802	0.0335
High	SAFGASHHV	7	1	1	P10301		0	3.05216e+06	0.004	0.01518	2.16457	2	912.432	-0.0369998	29.7903	0	C1203	81.48	A6802	0.0272
High	QSFPEPLII	3	1	1	Q9NRL2		0	3.76748e+06	0.004	0.01422	2.15094	2	1043.58	0.560656	96.3471	0	C1203	77.78	C1203	0.351
High	YVTTSTRTY	5	1	1	P08670		0	2.21598e+06	0.004	0.01721	2.12248	2	1091.54	-0.65317	38.5926	0	C1203	48.15	C1203	0.1046
High	ETKDPSSGQEV	3	1	1	Q9UKV3		0	852628	0.004	0.01679	2.05204	2	1176.54	-0.355378	28.3802	0		0	A6802	1.6122
High	ETFEHPNVV	22	1	1	Q00534		0	6.94904e+07	0.004	0.01427	2.04477	2	1071.51	-0.953997	53.6651	0	C1203	81.48	A6802	0.0088
High	HTISPLDLA	2	1	1	Q15365		0	1.68243e+06	0.004	0.01528	1.99811	2	966.525	-0.265054	69.7381	0	C1203	33.33	A6802	0.1059
High	SVFTFVAEV	3	1	1	Q7Z429		0	2.48688e+06	0.004	0.01426	1.9881	2	998.519	-0.83128	97.9591	0	C1203	48.15	A6802	0.0314
High	HTVGFILQL	5	1	1	Q5SRE5		0	4.72707e+06	0.004	0.01439	1.97289	2	1027.59	-0.334814	87.5014	0	C1203	77.78	A6802	0.0263
High	QQQQPQHAF	5	1	1	Q99967		0	3.17108e+06	0.004	0.01387	1.92867	2	1111.53	-1.83063	34.5101	0	C1203	29.63	B1503	0.0137
High	ETAPDSYKV	9	1	1	Q14244		0	3.98777e+07	0.004	0.01739	1.79909	2	1009.48	-0.978408	42.383	0	C1203	77.78	A6802	0.0058
High	FANYIDKV	3	1	1	P08670		0	2.06735e+06	0.005	0.01887	3.10128	2	969.504	0.098663	60.043	0	C1203	83.33	A6802	5.2482
High	NAFHHPSAV	12	1	1	P32314		0	5.22948e+06	0.005	0.02126	3.00986	2	979.474	-0.433577	33.9283	0	C1203	81.48	A6802	0.0977
High	FANGHVNSV	4	1	1	Q9NRL2		0	2.6045e+06	0.005	0.02133	3.00184	2	944.458	-0.461523	37.4999	0	C1203	85.19	C1203	0.0128
High	FQNESGSKY	5	1	1	O94806		0	1.0565e+06	0.005	0.02329	2.98564	2	1059.47	-0.48221	32.0648	0	C1203	44.44	B1503	0.0071
High	EVIRDVINV	18	1	1	Q6IEG0		0	2.21289e+07	0.005	0.02241	2.97113	2	1056.6	-1.44067	67.3231	0	C1203	44.44	A6802	0.0084
High	KTASINQNV	15	1	1	Q8NI77		0	2.49362e+07	0.005	0.02033	2.95648	2	974.526	-0.66165	33.3035	0	C1203	74.07	A6802	0.1703
High	SVSAVIVRA	14	1	1	Q68CR1		0	5.52544e+06	0.005	0.02259	2.85256	2	901.545	-1.79894	51.6509	0	C1203	11.11	A6802	0.1134
High	SKFAGGLHF	6	1	1	Q09666		0	3.39557e+06	0.005	0.01977	2.83969	2	963.504	-0.543133	56.4927	0	C1203	37.04	B1503	0.003
High	TLFGSVIRY	2	1	1	P09871		0	956190	0.005	0.01847	2.82176	2	1055.59	-0.707868	78.1501	0	C1203	51.85	B1503	0.1246
High	GKISKQEAY	4	1	1	P20936		0	771559	0.005	0.02206	2.81397	2	1023.55	-0.524629	26.6355	0	C1203	40.74	B1503	0.1051
High	KQADPFASL	7	1	1	Q5SR56		0	3.77376e+06	0.005	0.01865	2.79958	2	976.508	-1.55956	64.9439	0	C1203	44.44	B1503	0.0148
High	ELFSGGNTGI	8	2	2	O00571;O15523		0	2.11017e+06	0.005	0.02004	2.79207	2	994.484	-0.4245	72.1954	0	C1203	25.71	A6802	0.6754
High	YKKQFSQY	9	1	1	P46777		0	4.15724e+06	0.005	0.0226	2.78274	2	1091.55	-0.430607	33.9776	0	C1203	43.33	B1503	1.1827
High	AAAELIKEV	9	1	1	Q13425		0	4.55207e+06	0.005	0.01929	2.75942	2	943.545	-0.69594	57.986	0	C1203	96.3	C1203	0.2775
High	EIASITEQL	15	1	1	Q5UIP0		0	1.21981e+07	0.005	0.02	2.72352	2	1003.53	-0.278246	74.0033	0	C1203	44.44	A6802	0.0153
High	STAAVIQNV	10	1	1	Q6P4R8		0	3.54129e+06	0.005	0.01853	2.7044	2	902.494	-0.769494	56.9006	0	C1203	74.07	A6802	0.0054
High	EVSNTFVRL	9	1	1	Q9BUI4		0	1.41368e+07	0.005	0.01889	2.66268	2	1064.57	-1.02953	65.8777	0	C1203	44.44	A6802	0.0389
High	SIEGVTHAL	4	1	1	P07814		0	880547	0.005	0.01983	2.66174	2	926.493	-1.40834	55.238	0	C1203	40.74	A6802	0.4333
High	LSFQEVREY	1	1	1	O00311		0	569749	0.005	0.01991	2.61331	2	1170.58	-1.12507	64.4147	0	C1203	81.48	C1203	0.2278
High	TASAVVQHm	3	1	1	O75533	M9(Oxidation)	0	358081	0.005	0.01809	2.58319	2	959.461	-0.638105	27.5508	0	C1203	74.07	C1203	0.3108
High	KQFEGSTSF	4	1	1	Q8NFX7		0	1.75854e+06	0.005	0.01929	2.57405	2	1030.48	-0.696114	46.2266	0	C1203	37.04	B1503	0.0004
High	AAFEGTVFF	2	1	1	Q8NB49		0	641932	0.005	0.02165	2.56307	2	988.477	-0.541227	94.8008	0	C1203	81.48	C1203	0.01
High	RQLPAmTAL	10	1	1	Q13045	M6(Oxidation)	0	4.42201e+06	0.005	0.01792	2.56245	2	1016.56	-0.673835	48.3981	0	C1203	44.44	B1503	0.0154
High	EVVSHTSQV	3	1	1	Q8IX04		0	1.88566e+07	0.005	0.02021	2.54206	2	985.494	-0.506279	32.3033	0	C1203	40.74	A6802	0.0158
High	LENAKNAY	1	1	1	O00463		0	2.21145e+06	0.005	0.02283	2.53707	2	922.462	-0.952455	33.1469	0	C1203	33.33	B1503	1.9636
High	AAYQSVRIL	13	1	1	Q9HAT2		0	4.48231e+06	0.005	0.02072	2.53281	2	1020.58	-1.34072	62.2892	0	C1203	88.89	C1203	0.0263
High	DLSSVISKI	7	1	1	Q6PL18		0	1.67337e+06	0.005	0.02258	2.52806	2	961.556	-0.356082	82.2586	0	C1203	40.74	A6802	0.5587
High	STAAVFHAV	6	1	1	P57723		0	2.96771e+06	0.005	0.01994	2.49433	2	902.473	-0.621134	53.0444	0	C1203	70.37	A6802	0.0033
High	YTTDRVmTV	13	2	2	Q13547;Q92769	M7(Oxidation)	0	3.9242e+06	0.005	0.01798	2.4877	2	1101.52	-1.05606	44.2462	0	C1203	81.48	A6802	0.0094
High	TTTHITKTV	10	2	2	O43491;Q9Y2J2		0	7.1661e+06	0.005	0.0196	2.47477	2	1001.56	-0.551122	27.9769	0	C1203	74.07	A6802	0.0595
High	SVIEQIVYV	2	1	1	Q00653		0	823425	0.005	0.02326	2.45653	2	1049.59	-0.771388	88.6736	0	C1203	48.15	A6802	0.0039
High	EVANLLQGV	5	1	1	Q5VIR6		0	1.46161e+06	0.005	0.02272	2.45188	2	942.525	-0.34717	80.8477	0	C1203	40.74	A6802	0.0062
High	SASPIFTHV	8	1	1	Q9HCG8		0	4.63026e+06	0.005	0.01967	2.44916	2	958.499	-0.675546	60.0147	0	C1203	85.19	A6802	0.0323
High	VKNWVPTAY	1	1	1	O14957		0	1.91596e+06	0.005	0.0225	2.44887	2	1077.57	-1.01007	62.1952	0	C1203	44.44	B1503	0.0194
High	GVVDIFQTV	21	2	2	P23468;Q13332		0	1.16539e+07	0.005	0.0176	2.4403	2	977.53	-0.0739968	93.4748	0	C1203	44.44	A6802	0.0738
High	EIQGNINHV	5	1	1	Q86VI3		0	2.84282e+06	0.005	0.01963	2.43603	2	1023.52	-0.759738	41.8793	0	C1203	44.44	A6802	0.0775
High	RSYPYAFSV	7	1	1	Q5H9F3		0	6.23445e+06	0.005	0.01769	2.42787	2	1089.54	-0.529675	67.806	0	C1203	77.78	C1203	0.032
High	EVPPPFTLV	19	1	1	Q8NI35		0	1.60712e+07	0.005	0.0211	2.41819	2	998.555	-0.722069	95.2556	0	C1203	44.44	A6802	0.0081
High	ITAPIEAQV	6	1	1	P52756		0	3.2029e+06	0.005	0.01871	2.37583	2	941.53	-0.789907	67.7275	0	C1203	77.78	A6802	0.021
High	SQFPGAITL	13	1	1	Q8WZ82		0	2.5884e+06	0.005	0.02219	2.37062	2	933.504	-0.431307	84.4898	0	C1203	55.56	B1503	0.0055
High	SIIPPLFTV	4	1	1	P51571		0	786717	0.005	0.02174	2.36881	2	986.592	-0.362725	107.227	0	C1203	48.15	A6802	0.0132
High	RQYPTPFQL	9	1	1	Q8ND82		0	2.47165e+06	0.005	0.02198	2.36402	2	1149.6	-1.80615	72.8149	0	C1203	51.85	B1503	0.0118
High	YIKDFFEQM	1	1	1	Q5U649		0	850880	0.005	0.02075	2.32643	2	1220.57	0.641136	79.7169	0	C1203	37.04	C1203	0.1321
High	EVNKVISSV	8	1	1	Q93008		0	2.73517e+07	0.005	0.0229	2.30918	2	974.551	-0.675501	48.5922	0	C1203	40.74	A6802	0.0091
High	ETTKNVQQTV	3	1	1	O75586		0	3.69285e+06	0.005	0.01855	2.30317	2	1147.6	-0.103571	32.5565	0	C1203	42.86	A6802	0.5903
High	ETHFTGNEV	12	1	1	Q9BX74		0	1.58778e+08	0.005	0.02004	2.30185	2	1033.46	-2.60597	39.7454	0	C1203	70.37	A6802	0.0515
High	VQKVDQYLY	1	1	1	P52789		0	1.07411e+06	0.005	0.01801	2.29286	2	1155.6	-1.1027	56.9675	0	C1203	40.74	B1503	0.063
High	EVFHAGTAL	3	1	1	P22102		0	5.64231e+06	0.005	0.02074	2.28463	2	944.483	-0.669689	56.0747	0	C1203	40.74	A6802	0.0611
High	SELNIVENL	1	1	1	Q6ZWH5		0	537394	0.005	0.02208	2.28305	2	1030.54	-0.127957	84.9819	0	C1203	40.74	B1503	1.5224
High	DTFLSIEHL	2	1	1	O60306		0	309619	0.005	0.02257	2.27354	2	1074.55	-0.760632	84.4904	0	C1203	74.07	A6802	0.1217
High	FTFDADARV	1	1	1	O60291		0	0	0.005	0.02058	2.25234	2	1041.5	-1.16602	65.4195	0	C1203	77.78	A6802	0.0069
High	TTFEHDIQAL	7	1	1	Q01082		0	1.2129e+07	0.005	0.02087	2.24019	2	1174.57	-0.433726	66.4202	0	C1203	57.14	A6802	0.1885
High	ELQPPTTTV	4	1	1	Q9NYY3		0	4.35537e+06	0.005	0.02203	2.19396	2	985.519	-1.51089	60.4007	0	C1203	48.15	A6802	0.0892
High	FAYPAPLEV	3	1	1	Q99460		0	893939	0.005	0.02063	2.18764	2	1006.52	-0.596101	87.9571	0	C1203	100	C1203	0.0027
High	NVTSImFLV	1	2	2	P29992;P50148	M6(Oxidation)	0	816669	0.005	0.01969	2.14643	2	1039.55	0.0651292	93.7176	0	C1203	40.74	A6802	0.0457
High	ELFPIQmEGV	4	1	1	O96008	M7(Oxidation)	0	1.01247e+06	0.005	0.01844	2.13283	2	1178.58	-0.34197	89.6415	0	C1203	34.29	A6802	0.3394
High	ETANQEYKV	2	1	1	Q8WX93		0	5.04887e+06	0.005	0.02245	2.05299	2	1081.52	-0.698013	37.232	0	C1203	70.37	A6802	0.035
High	DTAPVIIFV	5	1	1	Q7Z2Z2		0	5.75579e+06	0.005	0.01821	2.05216	2	974.555	-0.30145	102.626	0	C1203	85.19	A6802	0.0034
High	KKAQAQPVm	5	1	1	P24539	M9(Oxidation)	0	571604	0.005	0.02225	2.04336	2	1016.56	-0.493711	17.2557	0	C1203	37.04	B1503	0.1202
High	RQADFVQVL	3	1	1	Q9Y2V7		0	1.5704e+07	0.005	0.02215	1.96623	2	1075.59	-1.24484	68.0903	0	C1203	51.85	B1503	0.0104
High	SQGVHISVY	6	1	1	O43395		0	1.7045e+06	0.006	0.02347	3.07462	2	989.505	-0.532691	55.3785	0	C1203	44.44	B1503	0.0117
High	SVVELVNKL	1	1	1	Q9BQE5		0	4.07502e+06	0.006	0.02601	2.83966	2	1000.6	-0.817935	72.8145	0	C1203	44.44	A6802	0.0721
High	GKPPTWSEF	2	1	1	O95573		0	3.02918e+06	0.006	0.02552	2.68501	2	1048.51	-0.753926	63.1627	0	C1203	40.74	B1503	0.7285
High	NASPVISSV	11	1	1	Q96T58		0	5.32899e+06	0.006	0.02593	2.64547	2	873.467	-0.376139	57.8091	0	C1203	88.89	A6802	0.01
High	NSSPVLSKV	3	1	1	Q9NXE8		0	3.24644e+06	0.006	0.02664	2.64519	2	930.525	-0.472085	45.9854	0	C1203	77.78	A6802	0.0394
High	KQLEDGRTL	9	4	4	P62987;P62979;P0CG47;P0CG48		0	2.83533e+06	0.006	0.02663	2.57247	2	1059.58	-0.536392	32.7736	0	C1203	48.15	B1503	0.0435
High	EVTKLQQQV	4	1	1	Q9NVF7		0	1845866	0.006	0.02378	2.53872	2	1072.6	-0.420042	42.6742	0	C1203	37.04	A6802	0.2264
High	IAFPAAPLL	3	1	1	Q4ZIN3		0	188246	0.006	0.02802	2.53503	2	912.555	0.105441	100.933	0	C1203	85.19	C1203	0.0088
High	SAVPVVILI	1	1	1	Q13635		0	749775	0.006	0.02426	2.53451	2	910.597	-0.21836	102.532	0	C1203	81.48	A6802	0.1068
High	EASDVVLEVL	2	1	1	Q9BVP2		0	514352	0.006	0.02465	2.41288	2	1073.57	-0.212446	92.7893	0	C1203	68.57	A6802	0.6131
High	DLAPIGIRV	1	1	1	Q99714		0	1.38599e+06	0.006	0.0282	2.4116	2	953.577	-0.547578	77.1012	0	C1203	51.85	A6802	0.065
High	STYPAPFYV	7	1	1	P15923		0	2.38159e+06	0.006	0.02683	2.40912	2	1044.5	-0.332984	85.1203	0	C1203	81.48	A6802	0.0045
High	EIADLNVRI	7	1	1	Q6KB66		0	2.82367e+06	0.006	0.02647	2.3887	2	1042.59	-0.61647	72.3165	0	C1203	40.74	A6802	0.0095
High	FTSSRHTVV	7	1	1	Q9NZ01		0	1.28796e+07	0.006	0.02812	2.38553	2	1033.54	-0.967349	31.523	0	C1203	81.48	C1203	0.2567
High	AQVPKSSAL	2	1	1	Q96F05		0	3.50716e+06	0.006	0.02658	2.30303	2	900.515	-0.41902	39.3531	0	C1203	48.15	B1503	0.0344
High	GKSTVINAm	2	1	1	O95140	M9(Oxidation)	0	612127	0.006	0.02521	2.30234	2	936.482	-0.223441	30.0929	0	C1203	37.04	B1503	0.2775
High	GQFPGHNEF	28	1	1	Q9UKI2		0	1.71822e+07	0.006	0.02789	2.29177	2	1032.45	-2.0047	51.6683	0	C1203	44.44	B1503	0.0015
High	EVSRISEVL	9	1	1	Q07065		0	5.12317e+06	0.006	0.02728	2.25688	2	1031.57	-2.28091	60.7863	0	C1203	44.44	A6802	0.1187
High	FASEVSNVL	6	1	1	Q92783		0	1.9851e+06	0.006	0.02743	2.20213	2	965.494	-0.314272	73.2216	0	C1203	88.89	C1203	0.0226
High	VAFPKSLVA	24	1	1	Q8IWI9		0	2.24983e+07	0.006	0.02763	2.20129	2	931.561	-0.367862	67.1738	0	C1203	59.26	C1203	0.1419
High	ETQKSIYYI	15	1	1	P08238		0	6.20937e+07	0.006	0.02475	2.19701	2	1144.59	-0.367823	60.7813	0	C1203	62.96	A6802	0.058
High	DQSYVISFV	4	1	1	O60488		0	965011	0.006	0.02495	2.12456	2	1057.52	-1.05228	93.5974	0	C1203	44.44	A6802	0.6442
High	AmYGGLVLF	4	1	1	Q9H3K2	M2(Oxidation)	0	3.0044e+06	0.006	0.02659	2.11601	2	986.502	-0.105279	98.6038	0	C1203	44.44	B1503	0.0186
High	SKTNTQTY	1	13	13	P30461;P30464;P30466;P18463;Q04826;P30479;P30481;P30483;P30485;P30486;P30487;P30488;P30490		0	256609	0.006	0.02332	2.08331	2	942.452	-0.417202	20.6269	0	C1203	26.67	B1503	1.3176
High	DIFPIVIHV	2	1	1	Q9BXL6		0	483155	0.006	0.0253	2.01883	2	1052.61	-0.233932	98.7039	0	C1203	55.56	A6802	0.0096
High	DVTQIVEIL	2	1	1	Q86XP3		0	1.55584e+06	0.006	0.02561	1.98776	2	1029.58	-0.248878	102.662	0	C1203	40.74	A6802	0.4342
High	mAMVDYQRVV	3	1	1	Q00266	M1(Oxidation)	0	8.86585e+06	0.006	0.02465	1.89402	3	1227.59	0.138913	72.1646	0	C1203	60	A6802	3.1718
High	SAVPFKILY	11	1	1	P10586		0	5.37701e+06	0.006	0.02583	1.76603	2	1037.6	-0.663818	80.6927	0	C1203	85.19	C1203	0.0483
High	RQKDVKDGKY	1	1	1	P62269		0	0	0.006	0.02363	1.70828	2	1236.67	-0.0647768	15.0922	0	C1203	34.29	B1503	0.1723
High	KQFQKVITEY	1	1	1	Q7KZF4		0	2.06461e+06	0.007	0.03092	2.92751	2	1283.7	2.23323	48.8371	0	C1203	37.14	B1503	0.0245
High	EVINESNSV	5	1	1	Q9BXT5		0	1.94857e+06	0.007	0.02921	2.89894	2	990.474	-0.254347	46.8152	0	C1203	37.04	A6802	0.0118
High	AKKPPVTF	13	1	1	Q14134		0	2.19811e+07	0.007	0.03077	2.88935	2	887.535	-0.139332	39.8453	0	C1203	36.67	B1503	0.5924
High	KKIPSTVEF	2	1	1	Q9H2G9		0	3.06301e+06	0.007	0.03202	2.86232	2	1048.6	0.150805	48.3515	0	C1203	44.44	B1503	0.0044
High	RTTEINFKV	2	2	2	P29762;P29373		0	5.1128e+06	0.007	0.0319	2.86162	2	1107.61	-1.17714	52.662	0	C1203	70.37	A6802	0.2312
High	GKAFGDSSY	4	1	1	Q9H5H4		0	2.39687e+06	0.007	0.03112	2.8468	2	931.416	-0.049771	38.735	0	C1203	40.74	B1503	0.1004
High	EVIAEAVGV	3	1	1	O15226		0	1.46618e+06	0.007	0.03017	2.83973	2	886.488	0.00384452	69.3058	0	C1203	40.74	A6802	0.0058
High	TTAKPQQIQA	9	1	1	P56192		0	2.94429e+06	0.007	0.02965	2.81274	2	1085.59	-0.874692	33.1532	0	C1203	22.86	A6802	1.2969
High	LAKQPGVSV	2	1	1	P57078		0	2.29958e+06	0.007	0.03278	2.74472	2	898.536	-0.134931	42.4481	0	C1203	77.78	C1203	0.1979
High	IQTRGGTF	6	1	1	O14672		0	1.14221e+07	0.007	0.02938	2.66439	2	879.468	-0.302596	37.9802	0	C1203	26.67	B1503	0.6922
High	NSASIFNTL	16	1	1	Q96HU1		0	4.85637e+06	0.007	0.03103	2.65188	2	966.489	-0.504171	81.954	0	C1203	77.78	A6802	0.0549
High	DVFNQIVKI	1	1	1	Q9H6T3		0	281905	0.007	0.02865	2.6502	2	1075.61	-0.340167	85.1071	0	C1203	40.74	A6802	0.0788
High	AKQDAQILY	4	1	1	P12429		0	3.09381e+06	0.007	0.0331	2.64657	2	1049.56	-2.51265	49.4167	0	C1203	48.15	B1503	0.0329
High	QTHSVFVNV	9	1	1	Q9Y3A5		0	2.40875e+07	0.007	0.03151	2.64493	2	1030.53	-1.1724	57.6899	0	C1203	74.07	A6802	0.0267
High	IAYDNIKVV	2	1	1	Q3B726		0	8.94742e+06	0.007	0.03009	2.61888	2	1034.59	-2.64507	64.6897	0	C1203	92.59	C1203	0.0086
High	DASEIQVQV	8	1	1	P18858		0	3.97312e+06	0.007	0.03218	2.58878	2	988.494	-0.181018	66.9562	0	C1203	85.19	A6802	0.0625
High	IGAARTKTY	3	1	1	Q9Y3B1		0	2.30727e+06	0.007	0.02871	2.57214	2	980.552	-0.659755	26.6779	0	C1203	48.15	C1203	0.3498
High	ALmPPFTAF	16	1	1	P51955	M3(Oxidation)	0	1.77352e+06	0.007	0.03096	2.52729	2	1010.5	-0.414679	92.341	0	C1203	40.74	B1503	0.0066
High	EVSRVLEQV	10	1	1	Q96R06		0	5.04202e+06	0.007	0.03186	2.50898	2	1058.58	-0.988008	55.6871	0	C1203	40.74	A6802	0.0149
High	ATIEmYTSI	7	1	1	P48553	M5(Oxidation)	0	7.3857e+06	0.007	0.03106	2.47187	2	1044.49	-3.6991	88.8722	0	C1203	66.67	A6802	0.1103
High	AKVKATTSL	2	1	1	A9YTQ3		0	890337	0.007	0.02947	2.45051	2	918.562	-0.226652	29.7063	0	C1203	40.74	B1503	0.1105
High	KAYHEQLSV	6	6	6	Q71U36;P68363;Q13748;Q6PEY2;P68366;Q9NY65		0	3.19767e+06	0.007	0.03221	2.42738	2	1074.56	-1.20528	39.0001	0	C1203	81.48	C1203	0.1001
High	KKFESPNIL	8	1	1	Q8NB16		0	1.04986e+07	0.007	0.02966	2.39612	2	1075.61	-1.36157	51.6377	0	C1203	48.15	B1503	0.0999
High	AAFDKIQQL	8	1	1	Q9P2I0		0	3.57501e+06	0.007	0.02927	2.34662	2	1033.57	-0.635759	63.0738	0	C1203	88.89	C1203	0.0051
High	HQmTPSSSY	4	1	1	Q93074	M3(Oxidation)	0	847839	0.007	0.0305	2.27464	2	1053.43	-0.711135	29.11	0	C1203	37.04	B1503	0.002
High	GQRPTQPVY	10	1	1	Q9H0W8		0	1.28964e+07	0.007	0.03374	2.26303	2	1045.54	-0.255727	38.001	0	C1203	48.15	B1503	0.0039
High	THRSGQGAF	5	1	1	P36578		0	893850	0.007	0.03254	2.23708	2	960.464	-0.375134	20.8656	0	C1203	33.33	B1503	0.6119
High	STYPIKNEV	7	1	1	P46977		0	1.67899e+06	0.007	0.02862	2.22325	2	1050.55	-0.536096	46.7677	0	C1203	81.48	A6802	0.0111
High	RAAPFSLEY	9	1	1	Q15181		0	6.77529e+06	0.007	0.03064	2.20193	2	1053.54	-0.682625	68.1346	0	C1203	92.59	C1203	0.008
High	SALEHVVEF	3	1	1	O75581		0	5.10246e+06	0.007	0.03067	2.17587	2	1030.52	-0.353385	69.3833	0	C1203	81.48	C1203	0.0225
High	KVPPFTFHV	17	1	1	Q6NZI2		0	8.17843e+06	0.007	0.0328	2.07485	2	1071.6	-0.970067	67.5641	0	C1203	44.44	A6802	0.1402
High	KKPSQTASY	2	1	1	Q8WUF5		0	528411	0.007	0.03189	1.87617	2	1009.53	-0.497243	19.6521	0	C1203	40.74	B1503	0.0854
High	GKEGQPREY	5	1	1	Q6P1J9		0	892252	0.007	0.03277	1.81596	2	1063.52	-0.775316	20.6982	0	C1203	51.85	B1503	0.9422
High	IHSQTSQQY	1	1	1	P15924		0	266152	0.007	0.032	1.50233	2	1091.51	-0.649965	26.8735	0	C1203	40.74	B1503	0.1501
High	STAPPAHGV	12	1	1	P15941		0	8.03656e+07	0.007	0.03296	1.43678	2	836.426	0.1492	29.9362	0	C1203	77.78	A6802	0.0052
High	KGFPHVIYA	18	1	1	Q13485		0	9.87209e+06	0.008	0.03535	2.86346	2	1031.57	-1.18622	55.9761	0	C1203	18.52	C1203	0.7882
High	SAYARLIDY	3	1	1	P34897		0	1.50242e+06	0.008	0.03485	2.67666	2	1071.55	-0.605716	65.2466	0	C1203	81.48	C1203	0.0352
High	KGYPSEFATY	3	1	1	P48730		0	2.19394e+06	0.008	0.03621	2.67114	2	1162.54	-0.516237	57.8608	0	C1203	34.29	B1503	0.7926
High	YTANFVNAI	6	1	1	Q7L1W4		0	3.33997e+06	0.008	0.03718	2.65766	2	1012.51	-0.760979	78.1663	0	C1203	70.37	A6802	0.0086
High	EVAKMIQEV	3	1	1	Q9NRD5		0	2.70683e+06	0.008	0.03424	2.56372	2	1046.55	-1.06886	57.2866	0	C1203	48.15	A6802	0.0091
High	EVYVGDERV	9	1	1	O14976		0	3.65301e+06	0.008	0.03696	2.5408	2	1065.52	-1.9434	49.6703	0	C1203	40.74	A6802	0.042
High	AAAALVLKA	4	1	1	Q9Y490		0	2.03834e+06	0.008	0.03472	2.49673	2	827.535	-0.309029	55.3489	0	C1203	51.85	A6802	2.3474
High	SLSAIFNNV	6	1	1	Q99808		0	938112	0.008	0.03713	2.44859	2	964.509	-0.556094	86.3926	0	C1203	40.74	A6802	0.3527
High	AKGPTLTVY	7	1	1	Q13616		0	5.09892e+06	0.008	0.03419	2.43658	2	949.534	-1.30178	54.17	0	C1203	51.85	B1503	0.0107
High	SKTQVTVQY	3	2	2	Q00266;P31153		0	1.62608e+06	0.008	0.03579	2.40831	2	1053.56	-0.443132	43.5067	0	C1203	40.74	B1503	0.0568
High	NKAEVHESY	5	1	1	Q15067		0	916653	0.008	0.03571	2.39266	2	1076.5	-0.304218	25.8674	0	C1203	44.44	B1503	0.1677
High	RQSVAGTY	6	1	1	Q9BX59		0	1.84346e+06	0.008	0.03423	2.38068	2	881.448	0.0420893	31.5162	0	C1203	30	B1503	0.066
High	RQGTPLIAF	10	1	1	Q2NL82		0	2.1415e+07	0.008	0.0348	2.32916	2	1002.57	-0.217166	71.0245	0	C1203	33.33	B1503	0.0066
High	FQRGNDVAF	2	1	1	P17931		0	2.95541e+06	0.008	0.03668	2.08792	2	1053.51	-1.38402	51.162	0	C1203	40.74	B1503	0.0058
High	NFFPGVFEY	2	1	1	Q76I76		0	205999	0.008	0.03476	2.04789	2	1119.51	-0.360464	101.662	0	C1203	55.56	C1203	0.4299
High	AKHESQQDY	2	1	1	Q14247		0	895062	0.008	0.03396	2.00296	2	1105.49	-0.339384	17.7936	0	C1203	44.44	B1503	0.1579
High	EAAEAHRQV	1	1	1	P50579		0	194531	0.008	0.03743	1.97389	2	1010.5	-0.463309	18.9434	0	C1203	85.19	A6802	0.2038
High	EVTEFFVTL	4	1	1	Q5T4S7		0	571484	0.008	0.03704	1.95983	2	1084.56	-0.405363	101.989	0	C1203	48.15	A6802	0.0182
High	VAYPLYILY	2	1	1	Q99567		0	298578	0.008	0.03546	1.88243	2	1114.62	0.0111532	103.3	0	C1203	92.59	C1203	0.0295
High	PQYQTWEEF	6	1	1	P49458		0	2.38664e+06	0.008	0.03487	1.69046	2	1227.53	0.259643	79.6484	0	C1203	37.04	B1503	0.9741
High	AKTQGNVF	7	1	1	O15371		0	6.02753e+06	0.009	0.04	3.03582	2	864.457	-0.054688	35.9657	0	C1203	30	B1503	1.7013
High	VTFSGIHLL	5	1	1	Q8N3Z3		0	880235	0.009	0.03968	2.6637	2	986.566	-0.720232	83.6176	0	C1203	81.48	C1203	0.0373
High	FSTTVIQNV	4	1	1	Q9Y5K8		0	5.55692e+06	0.009	0.0381	2.54641	2	1008.54	-1.04167	71.3417	0	C1203	74.07	A6802	0.1988
High	RKPDQVFQSY	1	1	1	Q96K76		0	1.36375e+06	0.009	0.03955	2.53825	2	1267.64	-0.874062	46.231	0	C1203	40	B1503	0.2794
High	GQKENVVVY	2	1	1	Q2NKX8		0	2.34486e+06	0.009	0.04014	2.52674	2	1035.55	-0.63643	44.6972	0	C1203	51.85	B1503	0.0059
High	FLYPFPLAL	5	1	1	Q5BJD5		0	2.39459e+06	0.009	0.04076	2.52434	2	1080.61	-0.254368	108.022	0	C1203	59.26	C1203	0.0127
High	VQIPPSTTY	1	1	1	Q12906		0	0	0.009	0.03933	2.49177	2	1005.52	-0.635095	64.3936	0	C1203	51.85	B1503	0.0007
High	AKGPGLFF	9	2	2	Q9NP85;P27105		0	6.85376e+06	0.009	0.03845	2.4816	2	836.466	-0.233252	72.5283	0	C1203	33.33	B1503	1.9107
High	LSKDGVLYV	11	1	1	Q9H1A4		0	8.85847e+06	0.009	0.0406	2.47368	2	993.561	-0.850231	61.6743	0	C1203	77.78	C1203	0.3348
High	HTALNTHSV	6	1	1	Q14690		0	5.04667e+06	0.009	0.03757	2.46096	2	979.495	-0.80932	30.0761	0	C1203	70.37	A6802	0.0096
High	SASRVVQVV	5	1	1	P82909		0	5.60752e+06	0.009	0.04167	2.40818	2	944.552	-0.824724	46.1582	0	C1203	85.19	C1203	0.5875
High	EVYGSVAKV	8	1	1	Q07864		0	2.67912e+07	0.009	0.03935	2.37176	2	951.513	-1.57873	47.8315	0	C1203	48.15	A6802	0.0054
High	TKFGGIVVL	2	1	1	O15118		0	629232	0.009	0.03977	2.36012	2	933.576	-0.58998	77.3758	0	C1203	55.56	B1503	0.0965
High	SSYPRPLTY	3	1	1	P15407		0	1.53857e+06	0.009	0.03931	2.34758	2	1083.55	-0.815095	55.2974	0	C1203	88.89	C1203	0.0021
High	SKFGTGNKY	4	1	1	P14735		0	1.87029e+06	0.009	0.04033	2.34289	2	1001.5	-0.231575	28.8712	0	C1203	44.44	B1503	0.014
High	EVFLKAFAV	5	1	1	O95373		0	1.74372e+06	0.009	0.03766	2.32867	2	1023.59	-0.668023	83.0655	0	C1203	40.74	A6802	0.0388
High	KTTTIAVEV	5	1	1	Q00341		0	2.60934e+06	0.009	0.03923	2.29644	2	961.555	-1.18126	53.894	0	C1203	74.07	A6802	0.3991
High	EVFSSFAHA	5	1	1	O60502		0	1.61564e+07	0.009	0.03863	2.22679	2	994.462	-1.0163	61.1375	0	C1203	7.41	A6802	0.035
High	EVVAGSHEL	5	1	1	Q01082		0	3.46644e+06	0.009	0.04086	2.09018	2	940.473	-0.177676	42.6283	0	C1203	40.74	A6802	0.0279
High	ETSKYYVTI	6	2	2	P68104;Q5VTE0		0	1.1082e+07	0.009	0.03845	2.08449	2	1103.56	-1.10076	61.4945	0	C1203	70.37	A6802	0.063
High	ETSTVITHV	9	1	1	Q8WXI7		0	3.98473e+06	0.009	0.0408	2.05029	2	986.515	-0.520209	46.8298	0	C1203	74.07	A6802	0.0047
High	TIPDFIFANV	7	1	1	P61073		0	990689	0.009	0.04036	1.98294	2	1136.6	-0.331779	104.665	0	C1203	28.57	A6802	0.1469
High	DVFHmVVEV	5	1	1	Q15181	M5(Oxidation)	0	5.60727e+06	0.009	0.03994	1.96475	2	1090.52	-0.863396	81.0432	0	C1203	51.85	A6802	0.043
High	FAmPYFIQV	8	1	1	Q00610	M3(Oxidation)	0	1.12753e+06	0.009	0.0417	1.57329	2	1131.55	-0.545943	92.9317	0	C1203	88.89	C1203	0.0468
Medium	EIADLVTSV	3	1	1	Q5MIZ7		0	1.80508e+06	0.01	0.04433	2.89669	2	946.509	-0.5787	80.1502	0	C1203	48.15	A6802	0.0038
Medium	KAYHEQLTV	6	1	1	Q9BQE3		0	0	0.01	0.04366	2.78117	2	1088.57	-0.76418	40.0215	0	C1203	85.19	C1203	0.0888
Medium	KAFQNPSTV	3	1	1	Q8NI77		0	1.4746e+06	0.01	0.04514	2.71191	2	991.52	-0.392321	40.3989	0	C1203	85.19	C1203	0.0183
Medium	QKYISNPLL	3	1	1	Q9BWV7		0	9.43649e+06	0.01	0.04316	2.68912	2	1075.61	-1.34297	51.5433	0	C1203	40.74	B1503	1.119
Medium	AQYDGAYKV	3	1	1	P11177		0	1.37023e+06	0.01	0.04588	2.67423	2	1014.49	-0.951767	45.1774	0	C1203	48.15	B1503	0.1193
Medium	SASKIIVFV	7	1	1	O15439		0	3.18689e+06	0.01	0.04186	2.66387	2	963.587	-0.382533	73.4119	0	C1203	85.19	A6802	0.0512
Medium	FQKSGASVV	4	1	1	Q5SSJ5		0	4.2784e+06	0.01	0.04219	2.65106	2	922.499	-0.117283	37.5817	0	C1203	48.15	B1503	0.58
Medium	SQRSPSELF	4	1	1	Q9Y2W1		0	1.38629e+06	0.01	0.04232	2.64054	2	1050.52	-1.00708	55.1829	0	C1203	33.33	B1503	0.0059
Medium	GKAFSRSSY	3	3	3	Q8N9K5;Q7L945;P17097		0	1.06267e+06	0.01	0.0427	2.63822	2	1002.5	-0.729125	30.0441	0	C1203	40.74	B1503	0.1169
Medium	EVYPGTYSV	2	1	1	Q9NQ31		0	9.36522e+06	0.01	0.04638	2.61911	2	1014.48	-1.12288	64.371	0	C1203	48.15	A6802	0.0009
Medium	YSADGHSIL	1	1	1	Q15269		0	2.6571e+06	0.01	0.04564	2.57053	2	962.457	-0.570774	53.6046	0	C1203	77.78	C1203	0.0298
Medium	YAFVRPVIL	1	1	1	Q96S16		0	488338	0.01	0.04293	2.48309	2	1077.65	-0.354569	82.3561	0	C1203	88.89	C1203	0.0064
Medium	YVTPVNRNV	4	1	1	P62993		0	2.23734e+06	0.01	0.04267	2.46012	2	1061.57	-0.643935	44.9517	0	C1203	51.85	A6802	0.0383
Medium	EQADIFERV	9	1	1	O60343		0	6.13606e+06	0.01	0.04467	2.44209	2	1106.55	-0.832113	64.1604	0	C1203	44.44	A6802	0.1776
Medium	GKEKLPRYY	3	1	1	P62280		0	5.02327e+06	0.01	0.04574	2.4197	2	1153.64	-0.150162	37.7512	0	C1203	44.44	B1503	0.9198
Medium	HVTIPTAHV	1	1	1	Q6P2H3		0	1.66321e+06	0.01	0.04316	2.36246	2	974.54	-2.34362	47.9953	0	C1203	37.04	A6802	0.0291
Medium	GQVQKIVLY	10	1	1	Q00610		0	4.28499e+06	0.01	0.04312	2.32179	2	1047.62	-1.34359	60.812	0	C1203	44.44	B1503	0.0174
Medium	ITAPPSRVL	2	1	1	O00767		0	4.13315e+06	0.01	0.04408	2.28654	2	953.577	-0.857124	53.7134	0	C1203	85.19	C1203	0.0544
Medium	TKAKNVSSY	7	1	1	Q9UNF0		0	819423	0.01	0.04541	2.27268	2	997.531	-0.197294	19.895	0	C1203	44.44	B1503	0.0229
Medium	SQDPGTHVV	13	1	1	Q9H8H0		0	1.92006e+07	0.01	0.0425	2.2131	2	939.453	-0.60683	33.8403	0	C1203	48.15	B1503	0.7661
Medium	AATPAVRTV	11	2	2	P11940;Q9H361		0	3.35256e+07	0.01	0.04349	2.21027	2	885.515	-0.18974	39.1839	0	C1203	96.3	C1203	0.1137
Medium	YSSPEILRV	2	1	1	Q2MV58		0	1.06151e+06	0.01	0.04407	2.20649	2	1063.58	-0.551894	66.1361	0	C1203	88.89	C1203	0.2389
Medium	YKKGDANTY	5	1	1	Q9NVX7		0	1.33583e+06	0.01	0.04357	2.1686	2	1059.51	-0.369855	20.441	0	C1203	48.15	B1503	0.0279
Medium	EAMKQILGV	2	1	1	Q14444		0	3.64234e+06	0.01	0.04317	2.16069	2	988.55	-0.0952805	65.1223	0	C1203	81.48	A6802	0.0393
Medium	QQNPQPLIF	4	1	1	O00170		0	6.89065e+06	0.01	0.0427	2.1201	2	1084.58	-0.517041	80.387	0	C1203	44.44	B1503	0.0054
Medium	ETYPDAVKI	7	1	1	Q8WV22		0	4.46729e+06	0.01	0.04195	2.08985	2	1035.53	-1.57994	59.3674	0	C1203	74.07	A6802	0.0167
Medium	NSSQVVVAV	21	1	1	Q16531		0	1.44669e+08	0.01	0.04247	2.0444	2	902.494	-0.296087	58.916	0	C1203	77.78	A6802	0.0339
Medium	RKDPNAEGRY	3	1	1	Q8N9N2		0	1.77524e+06	0.01	0.04485	1.96581	3	1205.6	0.123002	19.7183	0	C1203	31.43	B1503	1.1362
Medium	EVLDILTRL	1	1	1	O75955		0	400874	0.01	0.04374	1.62554	2	1071.64	-0.4319	92.7975	0	C1203	40.74	A6802	0.0191
Medium	ETHNFPTGV	4	1	1	O15067		0	3.03252e+06	0.011	0.04707	2.85862	2	1001.47	-1.32556	50.0332	0	C1203	70.37	A6802	0.0097
Medium	YKAPILLAL	5	1	1	O60341		0	589561	0.011	0.04737	2.71285	2	1001.64	-0.578807	86.8019	0	C1203	55.56	B1503	0.1787
Medium	KKNPSSPLY	4	1	1	O95478		0	2.29871e+06	0.011	0.04765	2.67862	2	1033.57	-0.852621	33.0693	0	C1203	44.44	B1503	0.0148
Medium	LATDILmGV	2	1	1	O43143	M7(Oxidation)	0	490910	0.011	0.04889	2.63911	2	948.507	-0.299206	82.3919	0	C1203	77.78	A6802	0.0768
Medium	DTFRGVAFV	13	1	1	O15067		0	2.2909e+07	0.011	0.0489	2.61984	2	1011.53	-0.780294	74.6148	0	C1203	74.07	A6802	0.0107
Medium	GKIIKPLQY	2	1	1	Q13823		0	4.04164e+06	0.011	0.04809	2.50545	2	1059.65	-2.26223	49.6445	0	C1203	44.44	B1503	0.1046
Medium	GLKQADTVY	1	1	1	P31327		0	1.82762e+06	0.011	0.04669	2.49863	2	994.52	-0.908465	42.5062	0	C1203	40.74	B1503	0.2054
Medium	RKEETVTVY	11	1	1	Q9BZX2		0	9.59384e+06	0.011	0.04988	2.48341	2	1124.59	-0.433481	36.9641	0	C1203	48.15	B1503	0.0125
Medium	GKVQENSAY	7	1	1	Q9Y3T9		0	1.33353e+06	0.011	0.04815	2.40544	2	995.479	-0.414776	27.2451	0	C1203	37.04	B1503	0.0726
Medium	MVNYNPETV	1	1	1	P27708		0	1.0283e+06	0.011	0.04681	2.39349	2	1066.49	-0.856556	60.8327	0	C1203	44.44	A6802	0.0625
Medium	FTSNTHSSV	2	2	2	Q9P2N7;Q9P2J3		0	1.63499e+06	0.011	0.05017	2.38374	2	979.448	-0.422622	29.0793	0	C1203	74.07	A6802	0.056
Medium	EVVQINEQV	4	1	1	Q969H4		0	0	0.011	0.04911	2.37294	2	1057.55	-1.19733	62.5164	0	C1203	37.04	A6802	0.0153
Medium	FTFGSKVTY	4	1	1	Q4LDE5		0	1.28541e+06	0.011	0.04698	2.34255	2	1049.53	-1.09665	65.2171	0	C1203	85.19	C1203	0.0093
Medium	QVADIDGQYA	5	1	1	P35222		0	2.07296e+06	0.011	0.04963	2.30072	2	1079.5	-0.798502	55.316	0	C1203	11.43	A6802	0.5722
Medium	EAVSVIQSI	9	1	1	Q9P035		0	9.2262e+06	0.011	0.04731	2.28365	2	945.525	-0.180135	75.1698	0	C1203	74.07	A6802	0.0782
Medium	EVYRGKLIEA	2	1	1	P62318		0	2.15571e+06	0.011	0.04667	2.2711	2	1177.66	-0.174133	46.55	0	C1203	8.57	A6802	0.3445
Medium	EVAKLFADA	1	2	2	O43252;O95340		0	1.1355e+06	0.011	0.04867	2.2672	2	963.514	-0.50293	61.3824	0	C1203	3.7	A6802	0.2279
Medium	GQIEPSFVF	2	1	1	O00443		0	2.02082e+06	0.011	0.04688	2.02539	2	1023.51	-0.284778	90.8273	0	C1203	37.04	B1503	0.0074
Medium	HQASHQPLY	3	1	1	Q99941		0	1.19033e+06	0.011	0.04865	1.89645	2	1080.52	-0.328717	30.1409	0	C1203	44.44	B1503	0.0103
Medium	GAARAGPGLSY	2	1	1	Q7Z7M0		0	1.71356e+06	0.012	0.05514	3.02064	2	1019.53	-1.57441	46.0863	0		0	B1503	0.9814
Medium	KNAPALISEY	1	1	1	Q8IWB1		0	1.25231e+06	0.012	0.05308	2.91217	2	1105.59	-0.927241	58.1253	0	C1203	31.43	B1503	1.0986
Medium	GQTGAGKTY	2	5	5	Q7Z4S6;O75037;Q5T7B8;Q9HAQ2;Q9BVG8		0	1.67043e+06	0.012	0.0514	2.73408	2	882.432	-0.0398292	20.8098	0	C1203	48.15	B1503	0.0156
Medium	KQYKVVVY	6	1	1	P08754		0	3.08929e+06	0.012	0.05203	2.71123	2	1026.6	-1.01864	43.8251	0	C1203	30	B1503	0.018
Medium	LRNQLQSVY	7	1	1	Q9BSM1		0	1.3952e+07	0.012	0.05455	2.66364	2	1120.61	-2.13562	49.3731	0	C1203	40.74	B1503	0.1483
Medium	ETAGFQEGV	10	1	1	Q5TCZ1		0	4.30965e+06	0.012	0.05563	2.46182	2	937.425	-1.11352	54.1195	0	C1203	74.07	A6802	0.0046
Medium	QQVPVNQVF	8	1	1	P39023		0	6.48653e+06	0.012	0.05206	2.39777	2	1058.56	-0.736766	69.3253	0	C1203	40.74	B1503	0.0054
Medium	EASSVKNEL	3	1	1	Q9P2D1		0	3.61557e+06	0.012	0.05175	2.36563	2	976.494	-0.495765	36.7183	0	C1203	85.19	A6802	0.4395
Medium	QAYPTTVVF	3	1	1	Q8IXB1		0	3.81937e+06	0.012	0.05273	2.36289	2	1025.53	-0.527157	79.8122	0	C1203	85.19	C1203	0.006
Medium	GKGSFGEVY	1	1	1	O00506		0	2.26241e+06	0.012	0.05499	2.30494	2	943.452	0.066422	48.2609	0	C1203	44.44	B1503	0.2111
Medium	EVVHTPETSV	6	1	1	O15427		0	7.12045e+06	0.012	0.05194	2.29099	2	1097.55	-0.520043	46.3204	0	C1203	25.71	A6802	0.2305
Medium	YAVFPFQQV	2	1	1	Q9Y289		0	1.14451e+06	0.012	0.05153	2.21186	2	1098.56	-0.513767	94.2514	0	C1203	77.78	A6802	0.059
Medium	QVIKPPLIFV	8	1	1	Q13428		0	3.1472e+06	0.012	0.05322	2.18069	2	1153.73	-0.722171	89.5284	0	C1203	28.57	A6802	0.152
Medium	EVFRVVDTL	5	2	2	Q07157;Q9UDY2		0	1.72569e+06	0.012	0.0526	2.17142	2	1077.59	-0.359915	73.8193	0	C1203	48.15	A6802	0.0424
Medium	KTIDYIQFL	1	1	1	Q9UH92		0	339625	0.012	0.05252	2.13771	2	1140.63	0.0711726	86.1172	0	C1203	74.07	C1203	0.0699
Medium	ESYHVPELI	7	1	1	P42704		0	4.32968e+06	0.012	0.05064	2.11191	2	1086.55	-0.630681	73.5387	0	C1203	66.67	A6802	0.1025
Medium	SSYGNIRAV	1	1	1	Q8N122		0	946316	0.012	0.05393	2.09946	2	966.5	-0.50368	46.7089	0	C1203	81.48	C1203	0.0147
Medium	FIASVNTLV	5	1	1	P53367		0	992438	0.012	0.05152	2.06725	2	963.55	-0.622383	87.3472	0	C1203	48.15	A6802	0.0202
Medium	ESSYIFVSV	6	1	1	P42336		0	3.01395e+06	0.012	0.05467	2.03165	2	1030.51	-0.452892	87.023	0	C1203	74.07	A6802	0.0172
Medium	AAISHGRVF	1	1	1	Q9NRX2		0	2.13562e+06	0.012	0.05139	1.9331	2	957.524	-2.40598	40.3329	0	C1203	81.48	B1503	0.051
Medium	EVFTHYDLL	1	2	2	Q9Y4K0;Q96JB6		0	1.13983e+06	0.012	0.05187	1.81225	2	1136.56	-0.51752	77.5602	0	C1203	40.74	A6802	0.1136
Medium	KAYGKAKSI	1	2	2	Q99613;B5ME19		0	521663	0.012	0.05579	1.72177	2	965.578	-0.393638	17.9354	0	C1203	77.78	C1203	0.0613
Medium	TVFNFPVSI	4	1	1	P28562		0	1.0892e+06	0.012	0.0527	1.59006	2	1023.55	-0.64553	101.93	0	C1203	40.74	A6802	0.0165
Medium	STFDHPELV	5	1	1	P78371		0	3.25877e+06	0.013	0.05639	2.97444	2	1044.5	-1.5288	61.5785	0	C1203	77.78	A6802	0.0068
Medium	SKHASGTSF	2	1	1	Q9ULD4		0	790827	0.013	0.05766	2.80016	2	921.442	-0.275649	19.4811	0	C1203	29.63	B1503	0.0083
Medium	YKAFSANKY	1	1	1	O75882		0	3.80209e+06	0.013	0.05587	2.78496	2	1091.55	-0.5516	34.1418	0	C1203	44.44	B1503	0.0652
Medium	VKLGPAKSY	1	1	1	Q8ND04		0	1.243e+06	0.013	0.05712	2.75335	2	962.566	-0.547963	37.4081	0	C1203	48.15	B1503	0.0253
Medium	REIESSPQY	2	1	1	Q8WWM7		0	1.05457e+06	0.013	0.05909	2.55524	2	1108.53	-0.38289	39.3698	0	C1203	40.74	B1503	0.0129
Medium	RKPEGGPSF	4	1	1	P59923		0	1.36857e+06	0.013	0.05971	2.55001	2	974.505	0.0189098	32.1762	0	C1203	33.33	B1503	0.0773
Medium	GKKKYETEF	5	1	1	Q96QD8		0	1.6343e+06	0.013	0.05955	2.54314	2	1129.59	-2.6366	29.7174	0	C1203	33.33	B1503	0.1692
Medium	KKDPNKPLTY	3	1	1	P14902		0	1.66918e+06	0.013	0.05965	2.47639	3	1203.67	0.237011	29.0196	0	C1203	40	B1503	0.2018
Medium	LTSDIIESI	3	1	1	P32780		0	2.13393e+06	0.013	0.05878	2.35497	2	990.535	-0.640762	82.9561	0	C1203	70.37	A6802	0.029
Medium	NSVFVATFL	5	1	1	O00767		0	684131	0.013	0.05937	2.33681	2	997.535	-0.576118	99.5862	0	C1203	66.67	A6802	0.2741
Medium	HAAHIISEL	3	1	1	Q96I24		0	3.85837e+06	0.013	0.05617	2.28407	2	990.535	-1.98347	49.4768	0	C1203	85.19	C1203	0.029
Medium	ELSPVRAEL	4	1	1	Q9BTE3		0	8.6161e+06	0.013	0.05931	2.2523	2	1013.56	0.208645	59.8231	0	C1203	51.85	A6802	0.1277
Medium	AGHLSTAQY	3	1	1	Q04637		0	1.61836e+07	0.013	0.05874	2.23625	2	947.458	-0.606011	36.5819	0	C1203	40.74	B1503	0.6529
Medium	DTHHLVNYI	5	1	1	Q01581		0	3.12138e+06	0.013	0.0576	2.21248	2	1111.55	-0.946198	56.7004	0	C1203	62.96	A6802	0.1144
Medium	HTAEITHEI	5	1	1	Q00597		0	3.77178e+06	0.013	0.05839	2.2116	2	1050.52	-0.532762	38.4148	0	C1203	70.37	A6802	0.0021
Medium	TAAGVDHRV	4	1	1	P28065		0	1.22184e+06	0.013	0.0591	2.19846	2	925.484	-0.679321	24.7636	0	C1203	81.48	A6802	0.0416
Medium	DVIYPmAVV	7	1	1	P78406	M6(Oxidation)	0	2.43883e+06	0.013	0.05658	2.12646	2	1022.52	-0.292217	79.4714	0	C1203	40.74	A6802	0.0294
Medium	TAFPKPLLT	4	1	1	Q9BZG8		0	7.68662e+06	0.013	0.05861	2.10209	2	987.588	0.306589	67.5237	0	C1203	55.56	C1203	0.9088
Medium	HSAPFSWET	6	1	1	Q9H425		0	6.20559e+06	0.013	0.0573	2.07276	2	1061.47	-1.07813	62.3416	0	C1203	44.44	A6802	0.7945
Medium	ETmNNIDRL	6	1	1	Q5T0N5	M3(Oxidation)	0	3.3133e+06	0.013	0.05606	2.04445	2	1121.53	-0.36755	47.0097	0	C1203	70.37	A6802	0.078
Medium	SAAFIISYV	3	1	1	Q8N682		0	1.18169e+06	0.013	0.05899	2.00396	2	970.524	-0.104798	93.9113	0	C1203	81.48	A6802	0.0174
Medium	LHGPSGSAF	2	1	1	P26006		0	2.50132e+06	0.014	0.06117	2.98139	2	872.426	-0.206758	45.8623	0	C1203	37.04	B1503	0.3147
Medium	GQNGGILVY	4	1	1	Q86XK2		0	1.60793e+06	0.014	0.06204	2.77998	2	920.484	-0.145824	69.4016	0	C1203	51.85	B1503	0.0056
Medium	AAASIANIV	1	1	1	P17987		0	2.30089e+06	0.014	0.0602	2.5775	2	829.478	0.428839	72.3448	0	C1203	85.19	A6802	0.4909
Medium	KVANIIAEV	1	1	1	P52306		0	2.17746e+06	0.014	0.06131	2.57538	2	956.577	-0.573262	63.8239	0	C1203	48.15	A6802	0.0455
Medium	mTALVNVAL	1	2	2	Q8WVM7;Q8N3U4	M1(Oxidation)	0	633490	0.014	0.0616	2.4803	2	947.523	-0.480931	80.5039	0	C1203	74.07	A6802	0.029
Medium	NIFRNVEV	3	2	2	Q7L523;Q5VZM2		0	1.51067e+07	0.014	0.06243	2.43655	2	990.535	-1.37738	64.131	0	C1203	50	A6802	4.4054
Medium	DTKAILEQI	6	1	1	Q6ZRV2		0	2.09786e+06	0.014	0.06132	2.41359	2	1030.58	-0.851304	71.5492	0	C1203	59.26	A6802	0.2102
Medium	GKGSFGEVF	11	2	2	Q9P289;Q9Y6E0		0	9.0265e+06	0.014	0.06091	2.41068	2	927.456	-0.758891	60.2812	0	C1203	37.04	B1503	0.253
Medium	MSVHLPFAV	3	1	1	Q9NVA2		0	352179	0.014	0.06027	2.08636	2	1000.53	-0.37733	86.0126	0	C1203	70.37	A6802	0.1714
Medium	FVYENPISL	2	1	1	Q6NTF9		0	2.44253e+06	0.014	0.06191	1.93736	2	1081.56	-0.363761	88.29	0	C1203	55.56	C1203	0.002
Medium	VVPQFVVFY	6	1	1	O14949		0	2.8512e+06	0.014	0.06032	1.74654	2	1097.6	-0.738746	101.621	0	C1203	48.15	C1203	0.8996
Medium	KQGEGFSVY	2	1	1	Q09019		0	4.01354e+06	0.015	0.06611	2.75385	2	1014.49	-2.1649	51.442	0	C1203	44.44	B1503	0.0037
Medium	LHGNPGSTY	1	1	1	Q7Z2W4		0	766891	0.015	0.06499	2.67799	2	945.442	-0.387189	32.134	0	C1203	40.74	B1503	0.1691
Medium	SATETINKL	1	1	1	P15924		0	1.73526e+06	0.015	0.06412	2.66563	2	976.531	-0.498866	45.4641	0	C1203	81.48	C1203	0.1654
Medium	EIQGNINKV	3	2	2	P46940;Q13576		0	2.7476e+06	0.015	0.06589	2.38076	2	1014.56	-0.815001	41.896	0	C1203	44.44	A6802	0.1268
Medium	HQFLSEQF	4	1	1	Q8TDB6		0	4.04143e+06	0.015	0.06555	2.37378	2	1035.49	-0.612435	64.2921	0	C1203	36.67	B1503	0.2817
Medium	TSSKVIQSV	4	1	1	O14976		0	9.5407e+06	0.015	0.06327	2.26084	2	948.535	-0.85017	39.5668	0	C1203	74.07	A6802	0.1549
Medium	EAFEHPNVV	3	1	1	P11802		0	4.33893e+06	0.015	0.06572	2.16901	2	1041.5	-0.922002	53.8884	0	C1203	88.89	A6802	0.0672
Medium	GQTGTGKTF	8	2	2	P52732;Q9Y496		0	1.87599e+06	0.016	0.07149	2.84496	2	896.447	-0.214421	28.3664	0	C1203	40.74	B1503	0.0184
Medium	KKTGKTVSY	2	1	1	O00244		0	1.87607e+06	0.016	0.06809	2.81492	2	1011.58	-1.92158	18.3843	0	C1203	44.44	B1503	0.0228
Medium	KQFKSEAY	3	1	1	Q03001		0	2.03838e+06	0.016	0.0698	2.77381	2	1000.51	-0.343077	28.1986	0	C1203	33.33	B1503	0.0268
Medium	GQKQSTTF	2	1	1	P78344		0	2.29537e+06	0.016	0.06683	2.72543	2	896.447	-0.339437	27.3011	0	C1203	33.33	B1503	0.2527
Medium	HAAKVILQV	1	1	1	Q63HN8		0	2.82163e+06	0.016	0.06869	2.71097	2	978.609	-0.0384894	48.958	0	C1203	85.19	A6802	0.0357
Medium	AQVKLLEF	3	1	1	Q9NR09		0	1.07352e+06	0.016	0.06915	2.65031	2	947.556	0.0502422	74.7715	0	C1203	33.33	B1503	0.3261
Medium	AQAESLRY	5	1	1	P23396		0	2.01657e+06	0.016	0.07065	2.54604	2	937.473	-1.04044	41.0113	0	C1203	26.67	B1503	0.1456
Medium	GKKGPQSLF	5	1	1	P46087		0	9.85057e+06	0.016	0.07087	2.53454	2	961.547	-0.0363084	43.7348	0	C1203	33.33	B1503	0.2266
Medium	RSATLAAAAL	3	1	1	Q8NG41		0	6.50889e+06	0.016	0.07134	2.53376	2	944.552	0.0693429	38.6408	0	C1203	51.43	C1203	4.6873
Medium	SVAQVKAmI	5	1	1	O15205	M8(Oxidation)	0	2.35742e+06	0.016	0.07046	2.50875	2	962.532	-2.22266	47.573	0	C1203	33.33	A6802	0.1254
Medium	ETFSDNNRL	1	1	1	Q8WTR7		0	1.24441e+06	0.016	0.06871	2.50271	2	1095.51	-0.60641	45.6154	0	C1203	74.07	A6802	0.0579
Medium	GTKWIDTQV	1	1	1	P06737		0	834415	0.016	0.07148	2.45183	2	1047.55	0.177022	58.391	0	C1203	66.67	A6802	1.1743
Medium	EAVDLITRL	3	1	1	Q9P0M9		0	1.74386e+06	0.016	0.07158	2.44293	2	1029.59	-0.732379	75.9532	0	C1203	81.48	A6802	0.06
Medium	VKSQISVY	1	1	1	Q9H8H0		0	1.27236e+06	0.016	0.07073	2.43077	2	923.519	-0.375295	46.5571	0	C1203	40	B1503	0.6481
Medium	SKAPDGSTL	4	1	1	Q9BXS9		0	2.12677e+06	0.016	0.06851	2.42706	2	875.447	-0.0517705	31.4454	0	C1203	51.85	B1503	0.3151
Medium	IKKDVDEAY	4	1	1	P05787		0	1.46265e+06	0.016	0.06982	2.41438	2	1080.56	-0.82299	32.3669	0	C1203	40.74	B1503	0.1024
Medium	SQQPASGVAY	1	1	1	Q96KR1		0	0	0.016	0.06819	2.38904	2	1007.48	-0.591582	45.0537	0	C1203	34.29	B1503	0.0157
Medium	LVIDVIHEV	1	1	1	Q9HAU8		0	974876	0.016	0.07097	2.34983	2	1036.6	-0.789529	79.4525	0	C1203	48.15	A6802	0.004
Medium	LQILGTNSF	3	1	1	Q9Y2G0		0	2.32227e+06	0.016	0.06672	2.33118	2	992.541	-0.0988133	77.5583	0	C1203	29.63	B1503	0.0053
Medium	TSSRVIQSV	4	1	1	O75061		0	4.57828e+06	0.016	0.06739	2.31839	2	976.542	-0.498381	40.2799	0	C1203	74.07	A6802	0.2615
Medium	EIYQKPFQTL	1	1	1	Q8NHH9		0	1.42828e+06	0.016	0.07138	2.31493	2	1266.67	0.287424	66.5246	0	C1203	34.29	A6802	0.9922
Medium	NAFSFPSEI	2	1	1	P17024		0	418716	0.016	0.06821	2.30915	2	1011.48	-0.275268	88.5314	0	C1203	81.48	A6802	0.0796
Medium	MTKEISSV	3	1	1	P78527		0	2.16394e+06	0.016	0.06953	2.26713	2	894.46	-0.216666	38.7542	0	C1203	73.33	A6802	2.8559
Medium	VMAPRTVLL	4	10	10	P01889;P30460;P30462;Q95365;P30475;P30480;P30486;Q29836;Q31612;Q31610		0	2.8582e+07	0.016	0.06762	2.19219	2	999.601	-1.25619	69.76	0	C1203	55.56	C1203	0.1791
Medium	DIFTHYDIL	1	1	1	P58215		0	1.11084e+06	0.016	0.06644	2.05721	2	1136.56	-0.51752	77.6969	0	C1203	40.74	A6802	1.2342
Medium	LVPEFVHNV	1	1	1	Q9HCD6		0	5.40345e+06	0.016	0.06956	1.96802	2	1053.57	-1.73776	68.2252	0	C1203	44.44	A6802	0.0239
Medium	EVADFLIKA	7	2	2	Q8IWZ3;O75179		0	1.2866e+07	0.016	0.06698	1.80644	2	1005.56	-0.738579	73.9508	0	C1203	11.11	A6802	0.0079
Medium	ETSDILHRm	1	1	1	Q9UHD2	M9(Oxidation)	0	1.15477e+06	0.017	0.07329	2.58949	2	1117.53	-0.326849	35.5908	0	C1203	66.67	A6802	0.0312
Medium	AQRYLLQY	5	1	1	P25789		0	3.80574e+06	0.017	0.07311	2.42667	2	1054.57	-1.13908	61.749	0	C1203	26.67	B1503	0.3586
Medium	TTTKLVYQI	5	1	1	P26358		0	1.87347e+06	0.017	0.072	2.36963	2	1066.61	-1.60778	61.8373	0	C1203	62.96	A6802	0.193
Medium	ETFNHANGL	2	2	2	P67775;P62714		0	3.37568e+06	0.017	0.07206	2.36246	2	1002.46	-0.665227	44.2606	0	C1203	70.37	A6802	0.0216
Medium	QKAPDGKSY	1	1	1	Q9HBL8		0	1.52637e+06	0.017	0.07187	2.22398	2	993.5	-0.342136	22.0459	0	C1203	51.85	B1503	0.1579
Medium	KQASGNIVY	1	1	1	Q16666		0	5.52885e+06	0.017	0.07181	2.11641	2	979.52	-0.324607	39.3982	0	C1203	51.85	B1503	0.0031
Medium	NSSPVINHL	6	1	1	Q9Y2I9		0	3.69693e+06	0.017	0.07187	2.09897	2	980.515	-1.01996	50.3511	0	C1203	81.48	A6802	0.0817
Medium	YAKNNIPII	3	1	1	P46977		0	3.30146e+06	0.017	0.07319	2.09194	2	1045.6	-1.78926	64.4694	0	C1203	74.07	C1203	0.0828
Medium	ETADVKASVL	2	1	1	Q8N1F7		0	6.4878e+06	0.017	0.0728	2.06475	2	1032.56	-1.10738	50.6534	0	C1203	57.14	A6802	0.0866
Medium	FAYEGPmYL	2	1	1	Q96MT1	M7(Oxidation)	0	826108	0.017	0.07425	2.05629	2	1106.49	0.0265921	83.4113	0	C1203	88.89	C1203	0.0008
Medium	EVISKTPTL	1	1	1	Q8IUR6		0	1.73231e+06	0.017	0.07346	1.99477	2	987.571	-0.866443	53.8043	0	C1203	44.44	A6802	0.0382
Medium	GKTIQSITF	1	3	3	Q8TD26;Q9P2D1;Q3L8U1		0	956173	0.018	0.07493	2.78145	2	994.557	-0.246488	61.9183	0	C1203	37.04	B1503	0.1695
Medium	QHASPAGTY	4	2	2	P05187;P09923		0	1.5142e+06	0.018	0.07891	2.75751	2	931.427	-0.300646	29.5957	0	C1203	48.15	B1503	0.2549
Medium	KATPLVLKA	1	1	1	O75354		0	1.18057e+06	0.018	0.07712	2.59776	2	940.619	-0.417164	44.356	0	C1203	51.85	C1203	2.1789
Medium	QKAEVGSPL	2	1	1	P0C7P0		0	6.69491e+06	0.018	0.07882	2.4623	2	928.51	-0.194017	42.7039	0	C1203	44.44	B1503	1.0156
Medium	GKAPSSSQL	3	1	1	Q9NVE5		0	977709	0.018	0.07734	2.4547	2	874.463	-0.318198	28.6711	0	C1203	48.15	B1503	0.7391
Medium	GKRIGVFSY	12	1	1	Q01581		0	1.15849e+07	0.018	0.07855	2.45215	2	1026.57	-0.915811	55.6099	0	C1203	40.74	B1503	0.081
Medium	QAGPINREm	1	2	2	Q5VTR2;O75150	M9(Oxidation)	0	633582	0.018	0.07857	2.40628	2	1031.49	-1.03816	29.0795	0	C1203	81.48	C1203	0.8797
Medium	FTTHILEVI	3	1	1	P15927		0	1.10531e+07	0.018	0.07831	2.38753	2	1072.6	-0.639899	82.6832	0	C1203	66.67	A6802	0.3783
Medium	ESGDVKATV	1	1	1	Q9H0A8		0	1.76211e+06	0.018	0.07548	2.32354	2	905.457	-0.196929	32.4231	0	C1203	74.07	A6802	0.1373
Medium	YASNITSVL	4	2	2	Q13085;O00763		0	4.57216e+06	0.018	0.0785	2.31256	2	967.509	-0.38187	76.0717	0	C1203	85.19	C1203	0.0072
Medium	STSAVNHNV	6	1	1	Q07157		0	8.66441e+06	0.018	0.07849	2.27903	2	928.448	-0.483344	25.9257	0	C1203	70.37	A6802	0.0123
Medium	SVATLAEIYV	1	1	1	P36956		0	511532	0.018	0.07808	2.2556	2	1065.58	-0.574757	90.6169	0	C1203	22.86	A6802	0.393
Medium	FAGPHSTL	5	1	1	Q9Y5X2		0	2.74813e+06	0.018	0.07858	2.20052	2	829.42	-0.117776	45.2029	0	C1203	90	C1203	1.0372
Medium	ETHFGFETV	7	1	1	Q5HYK3		0	1.30068e+07	0.018	0.07759	2.17933	2	1066.48	-0.787077	66.3691	0	C1203	70.37	A6802	0.0144
Medium	TVTDFGTPRL	1	1	1	Q9Y5E7		0	1.98649e+06	0.018	0.07658	2.16835	2	1106.58	-0.283274	75.7553	0	C1203	34.29	A6802	0.7339
Medium	FAMTNQIL	1	1	1	P31327		0	420931	0.018	0.0778	2.16835	2	937.481	-0.285558	80.8266	0	C1203	83.33	C1203	1.5429
Medium	RQIDQFLVV	2	2	2	O94776;Q9BTC8		0	7.85574e+06	0.018	0.07773	2.16178	2	1117.64	-0.719004	77.3184	0	C1203	48.15	B1503	0.0831
Medium	EILNIFQGV	1	1	1	Q9H0H0		0	0	0.018	0.07555	2.0407	2	1032.57	-0.744188	100.765	0	C1203	37.04	A6802	0.0751
Medium	RGFGFVTY	2	3	3	Q32P51;P09651;P51991		0	2.91898e+06	0.018	0.07658	1.97046	2	946.478	-0.542647	71.3667	0	C1203	33.33	B1503	0.7393
Medium	AKPDSTLHTY	2	1	1	Q6NUQ4		0	1.39349e+06	0.019	0.08348	2.56855	2	1132.56	-2.42532	34.3474	0	C1203	40	B1503	0.324
Medium	LKVKGNVF	3	1	1	P84098		0	3.01993e+06	0.019	0.08082	2.39707	2	904.561	-0.271335	45.5018	0	C1203	33.33	B1503	1.1998
Medium	GKAAAAVAF	7	1	1	Q8NEB5		0	1.66582e+06	0.019	0.08271	2.32674	2	805.456	-0.465417	46.8135	0	C1203	37.04	B1503	0.0233
Medium	YAYDGKDYL	1	1	17	P17693;P01892;P30447;P05534;P10316;P01889;P30460;Q04826;P30479;P30480;P30486;P18464;P30490;P30498;Q31610;P30499;P04222		0	2.17756e+06	0.019	0.08103	2.30273	2	1107.5	-1.33722	57.4734	0	C1203	85.19	C1203	0.0044
Medium	FAHLPKSTF	1	1	1	P26641		0	1.40239e+06	0.019	0.08363	2.29185	2	1047.56	-0.280702	54.4146	0	C1203	74.07	C1203	0.0247
Medium	mAQAPAQSQF	1	1	1	Q92793	M1(Oxidation)	0	1.88784e+06	0.019	0.07933	2.25439	2	1094.49	0.00143645	91.4429	0	C1203	62.86	B1503	0.091
Medium	ITGPIAKL	2	1	1	Q96FQ6		0	2.28926e+06	0.019	0.08148	2.19104	2	812.524	-0.634032	59.1433	0	C1203	70	C1203	5.2889
Medium	ATSSVFQEV	3	1	1	Q9BTE0		0	3.96059e+06	0.019	0.08116	2.14031	2	967.473	-0.262897	67.3518	0	C1203	81.48	A6802	0.0874
Medium	DVSSFLDQV	1	1	1	O94888		0	344714	0.019	0.08421	2.13602	2	1009.48	-0.0813864	91.0883	0	C1203	44.44	A6802	0.0431
Medium	EVFSYHQGL	2	1	1	Q9Y285		0	1.97197e+06	0.019	0.08144	2.1206	2	1079.52	-0.554928	60.6685	0	C1203	44.44	A6802	0.0588
Medium	IASAQVSTSF	1	1	1	Q9NZP6		0	0	0.019	0.08157	2.09535	2	1010.51	-0.396949	26.375	0	C1203	60	C1203	1.7342
Medium	SVSTINHQA	4	1	1	Q96PP9		0	3.23186e+06	0.019	0.08366	2.04187	2	956.479	-0.585266	27.6887	0	C1203	3.7	A6802	0.3514
Medium	EVFPEFAAA	8	1	1	O15294		0	4.8241e+06	0.019	0.07979	1.94564	2	980.472	-0.406782	83.0641	0	C1203	11.11	A6802	0.0163
Medium	RALALVVTL	1	1	1	O00622		0	2.08153e+06	0.019	0.08053	1.72725	2	955.63	-0.448013	80.9258	0	C1203	85.19	C1203	0.0638
Medium	ETIGVVHLV	1	1	1	Q63HN8		0	1.26863e+07	0.019	0.07985	1.71626	2	966.561	-0.531129	70.9846	0	C1203	74.07	A6802	0.002
Medium	RQPPPGAAH	1	1	1	P22004		0	302036	0.019	0.08424	1.71157	2	930.49	-0.465848	17.4133	0	C1203	7.41	B1503	0.3143
Medium	AARPATSTL	11	1	1	Q04637		0	1.71722e+07	0.02	0.08749	2.63086	2	887.494	-0.271558	33.9923	0	C1203	88.89	C1203	0.0128
Medium	TAVTVNQSL	2	1	1	P05787		0	1.62879e+06	0.02	0.08842	2.62487	2	932.504	-0.745714	55.7529	0	C1203	74.07	C1203	0.3481
Medium	TTSRDIPPGTEL	1	1	1	P57071		0	3.04134e+06	0.02	0.08483	2.51859	2	1286.66	-0.183759	56.7883	0		0	A6802	1.2934
Medium	DVTSTTSSRV	3	1	1	Q7Z2W4		0	1.36756e+06	0.02	0.0861	2.49753	2	1052.52	-0.331895	35.8196	0	C1203	25.71	A6802	1.209
Medium	KAVGHPFVI	7	1	1	O14980		0	1.82921e+07	0.02	0.08699	2.45529	2	967.571	-1.74146	52.058	0	C1203	77.78	C1203	0.1068
Medium	VQFDGTNSAF	1	1	1	Q8WWK9		0	1.73469e+06	0.02	0.0858	2.3689	2	1085.49	-0.849479	68.6961	0	C1203	51.43	B1503	0.005
Medium	KSLCSRGmY	3	1	1	Q8IUF8	M8(Oxidation)	0	2.69235e+07	0.02	0.08444	2.33846	2	1060.49	-0.186483	77.1749	0	C1203	66.67	C1203	4.5497
Medium	KKIEKLEEY	1	1	1	O95786		0	1.62517e+06	0.02	0.08445	2.33478	2	1179.66	-0.704345	33.3483	0	C1203	44.44	B1503	0.027
Medium	EEAQRKSTY	1	1	1	Q7Z2Y8		0	1.9337e+06	0.02	0.08751	2.29294	2	1111.54	-0.414008	36.895	0	C1203	44.44	B1503	1.608
Medium	SQANIAQVL	2	2	2	Q10567;P63010		0	955875	0.02	0.0853	2.27949	2	943.521	-0.218213	69.6883	0	C1203	44.44	B1503	0.0614
Medium	YVTSVILHI	2	1	1	Q5VIR6		0	548873	0.02	0.08843	2.2751	2	1044.61	-0.836242	79.9763	0	C1203	44.44	A6802	0.1388
Medium	GKAKITGGY	1	1	1	Q9BQ69		0	558726	0.02	0.08754	2.24834	2	894.504	-0.20493	27.2911	0	C1203	40.74	B1503	0.3893
Medium	DVINVFHHL	2	1	1	Q9UK58		0	667294	0.02	0.08686	2.1904	2	1093.58	-0.591298	71.7974	0	C1203	37.04	A6802	0.0237
Medium	ETIRNYAQV	5	1	1	Q9Y6E2		0	1.55076e+07	0.02	0.08569	2.17137	2	1093.56	-2.48785	49.4312	0	C1203	66.67	A6802	0.0208
Medium	EIAAVIETV	5	1	1	Q7Z4G1		0	2.27269e+07	0.02	0.08702	1.99493	2	944.529	-1.0196	78.1533	0	C1203	48.15	A6802	0.0047
Medium	EVHVQEETV	1	1	1	Q53GL7		0	3.47237e+06	0.021	0.08934	2.80629	2	1069.52	-0.943468	42.3467	0	C1203	40.74	A6802	0.354
Medium	AKQPHVGDY	2	1	1	Q06323		0	1.09721e+06	0.021	0.09168	2.71399	2	1014.5	-0.600175	31.4839	0	C1203	51.85	B1503	0.152
Medium	RKVPGVTAI	5	3	3	Q06787;P51114;P51116		0	7.01754e+06	0.021	0.09379	2.6337	2	940.593	-0.413438	43.6346	0	C1203	40.74	B1503	0.0813
Medium	SKVNIGSSF	1	1	1	P48052		0	2.79098e+06	0.021	0.09175	2.61621	2	938.493	-0.870047	54.7141	0	C1203	29.63	B1503	0.0092
Medium	NSYPHQLYT	3	1	1	Q8IZD2		0	1.8605e+06	0.021	0.09193	2.51744	2	1122.52	0.398108	47.5734	0	C1203	44.44	A6802	1.1212
Medium	TVADHIQKV	2	1	1	Q9Y678		0	2.54921e+06	0.021	0.09216	2.47738	2	1010.56	-0.711363	36.7651	0	C1203	48.15	A6802	0.0072
Medium	AKSVPTKTY	3	2	2	Q00537;Q07002		0	846210	0.021	0.09205	2.47727	2	994.556	-0.604649	26.2109	0	C1203	51.85	B1503	0.0186
Medium	YVNLPTIAL	2	1	1	P08865		0	1.30934e+06	0.021	0.09193	2.38034	2	1003.58	-1.42804	95.6767	0	C1203	44.44	C1203	0.0265
Medium	GKGNFGEVY	2	1	1	P16591		0	3.12266e+06	0.021	0.08917	2.37073	2	970.463	-0.412507	47.4083	0	C1203	40.74	B1503	0.2403
Medium	AQFKGTQSL	1	1	1	Q9UK61		0	9.7831e+06	0.021	0.09267	2.34617	2	979.52	-0.334816	43.2606	0	C1203	44.44	B1503	0.0068
Medium	KANPGAWIL	7	2	2	Q9NYU2;Q9NYU1		0	6.19656e+06	0.021	0.09203	2.34547	2	969.551	-0.627415	71.5901	0	C1203	81.48	C1203	0.1562
Medium	HQSPSSSSY	4	1	1	O43298		0	1.10648e+06	0.021	0.09097	2.31531	2	979.411	-0.0875148	24.3976	0	C1203	48.15	B1503	0.0043
Medium	STIGQAFEL	6	2	2	P29353;Q6S5L8		0	3.33764e+06	0.021	0.09091	2.21757	2	965.493	-0.440705	82.9127	0	C1203	74.07	A6802	0.0363
Medium	EVPFFPARV	1	1	1	P48200		0	3.042e+06	0.021	0.08962	2.1628	2	1061.58	0.0255828	78.691	0	C1203	40.74	A6802	0.0212
Medium	GKTISLTDF	1	1	1	P23588		0	449139	0.021	0.09081	2.11526	2	981.526	0.572679	69.0324	0	C1203	29.63	B1503	1.099
Medium	SSVEHVVEF	2	1	1	O75197		0	4.06405e+06	0.021	0.08888	2.0879	2	1032.5	0.108628	59.8863	0	C1203	74.07	C1203	0.0488
Medium	AQNASRNTF	1	1	1	Q01970		0	763037	0.021	0.09262	2.01979	2	1008.49	-0.611094	27.8563	0	C1203	37.04	B1503	0.0039
Medium	ETAKATPRL	1	1	1	Q13428		0	1.06242e+07	0.021	0.09109	1.98641	2	986.562	-0.615072	31.6603	0	C1203	70.37	A6802	0.0701
Medium	TTFEYPNTI	6	1	1	P02749		0	2.07116e+06	0.021	0.09139	1.9512	2	1085.52	0.0653581	73.7743	0	C1203	74.07	A6802	0.0139
Medium	TVTTVILEV	2	1	1	Q9UKF6		0	1.04847e+07	0.021	0.09363	1.93013	2	974.576	-0.553836	86.5303	0	C1203	48.15	A6802	0.0526
Medium	VQPSKFNSY	1	1	1	P41229		0	2.79566e+06	0.021	0.09146	1.78697	2	1069.53	-0.469348	43.4617	0	C1203	44.44	B1503	0.035
Medium	SKDEARSSF	1	1	1	Q6P4F7		0	221474	0.021	0.09367	1.34428	2	1026.48	-0.31417	21.9339	0	C1203	33.33	B1503	0.1037
Medium	VKAPGKSSF	1	1	1	Q8N4C8		0	1.66432e+06	0.022	0.09499	2.60395	2	920.52	-0.303465	32.5639	0	C1203	44.44	B1503	0.0099
Medium	LQKPGETVF	3	1	1	Q6NYC1		0	1.9245e+06	0.022	0.09599	2.55577	2	1018.56	-0.669961	53.7247	0	C1203	40.74	B1503	0.0034
Medium	HAFDGRPSVA	4	1	1	Q17R31		0	3.92605e+06	0.022	0.09742	2.51426	2	1056.52	-0.374044	38.0194	0	C1203	60	A6802	1.5652
Medium	KKEGGTVVY	5	1	1	P49419		0	2.39772e+06	0.022	0.09564	2.51153	2	980.541	-0.411255	28.5321	0	C1203	48.15	B1503	0.0277
Medium	HTFFIGDHA	3	1	1	O15294		0	3.38851e+06	0.022	0.09494	2.47397	2	1044.49	-1.16642	52.5952	0	C1203	33.33	A6802	0.1073
Medium	AKLPTTAF	4	1	1	Q7Z333		0	2.06741e+06	0.022	0.09633	2.39212	2	848.488	-0.160177	56.6625	0	C1203	30	B1503	0.3803
Medium	RAYDGTTYL	4	1	1	Q53GS9		0	6.27006e+06	0.022	0.09463	2.32237	2	1059.51	-1.40678	52.4019	0	C1203	81.48	C1203	0.0009
Medium	STSSVFRLV	2	1	1	Q8WYP5		0	875931	0.022	0.09765	2.12746	2	995.552	-0.195724	70.5706	0	C1203	77.78	A6802	0.065
Medium	RQYEQQTY	2	1	1	Q9Y262		0	793604	0.022	0.09816	2.12565	2	1115.51	-0.417121	32.9711	0	C1203	26.67	B1503	0.0071
Medium	ESFIKAIGV	4	1	1	Q9NRN7		0	3.22171e+06	0.022	0.09618	2.05749	2	963.551	-0.379385	73.4852	0	C1203	74.07	A6802	0.0612
Medium	mEFCAQGQLY	1	1	1	Q12852	M1(Oxidation)	0	3.30328e+06	0.022	0.09521	2.0231	2	1205.5	-0.18317	76.0988	0	C1203	42.86	B1503	0.9573
Medium	ESVFVETFV	2	1	1	Q8N3Y7		0	569817	0.022	0.09678	1.71146	2	1056.52	-0.368793	92.2155	0	C1203	66.67	A6802	0.0541
Medium	GKGGFGTVF	1	2	2	Q9P1W9;Q9Y572		0	2.76778e+06	0.023	0.102	2.57293	2	869.451	-0.333263	61.1796	0	C1203	37.04	B1503	0.0703
Medium	IQKTGGTTF	1	3	3	O60243;Q96MM7;Q8IZP7		0	1.70287e+06	0.023	0.1017	2.55897	2	952.509	-0.883491	36.8006	0	C1203	33.33	B1503	0.0021
Medium	AQSPELRTY	2	1	1	Q5T280		0	932442	0.023	0.1012	2.39103	2	1064.54	-0.434562	44.2292	0	C1203	59.26	B1503	0.0034
Medium	YVSPRILTA	2	1	1	Q9H992		0	1.14106e+06	0.023	0.1011	2.37252	2	1019.59	-1.33149	60.387	0	C1203	25.93	C1203	0.0849
Medium	EVLQQLIVm	1	1	1	Q9P219	M9(Oxidation)	0	0	0.023	0.1023	2.30114	2	1088.6	-1.31615	66.1161	0	C1203	37.04	A6802	1.2301
Medium	AASPIITLV	1	1	1	Q8TEM1		0	4.15159e+06	0.023	0.1014	2.22341	2	884.545	-0.0437748	88.0502	0	C1203	92.59	C1203	0.0772
Medium	NTSSTNHQL	2	1	1	Q9H992		0	2.54721e+06	0.023	0.1008	1.96419	2	1001.46	-0.034042	23.8732	0	C1203	74.07	A6802	0.1248
Medium	ELPAILQQV	2	1	1	Q4ZIN3		0	789404	0.023	0.1043	1.85751	2	1010.59	-0.120762	90.0756	0	C1203	37.04	A6802	0.0841
Medium	QAAGVSVHV	1	1	1	Q5T4B2		0	2.2505e+06	0.023	0.09914	1.82699	2	867.468	0.0450191	45.4558	0	C1203	85.19	A6802	0.0169
Medium	ETQKEVHNL	1	1	1	Q53EZ4		0	686787	0.023	0.1029	1.78174	2	1097.56	-0.630831	27.5791	0	C1203	70.37	A6802	0.3476
Medium	FSVAANGSVY	1	1	1	Q9BYE9		0	3.85948e+06	0.024	0.1082	2.62757	2	1014.49	-1.80392	51.5298	0	C1203	65.71	C1203	1.429
Medium	SVFGQVERA	1	1	1	Q15233		0	2.31222e+06	0.024	0.1076	2.58417	2	992.515	-1.39675	51.6209	0	C1203	11.11	A6802	0.2015
Medium	ESTPIAETI	3	1	1	P42167		0	5.93596e+06	0.024	0.1074	2.4944	2	960.487	-1.34527	64.8893	0	C1203	70.37	A6802	0.1459
Medium	KLNGQVLVF	1	1	1	Q15459		0	1.80948e+06	0.024	0.1077	2.34615	2	1017.61	-0.552431	71.8005	0	C1203	44.44	B1503	0.0678
Medium	TTSHLHQAV	4	1	1	P22695		0	3.16874e+06	0.024	0.1053	2.26681	2	993.511	-0.393029	23.8046	0	C1203	70.37	A6802	0.0974
Medium	TQLPESTSL	1	1	1	Q13564		0	1.67429e+06	0.024	0.1094	2.26375	2	975.497	-2.6649	60.9729	0	C1203	44.44	B1503	0.0915
Medium	RKYVNGSTY	3	1	1	Q6P2Q9		0	1.87749e+06	0.024	0.1062	2.21487	2	1087.55	-0.967078	29.533	0	C1203	44.44	B1503	0.0043
Medium	VVKPPGSSL	7	1	1	Q92560		0	1.48982e+07	0.024	0.1095	2.10896	2	883.525	-0.165851	45.2809	0	C1203	48.15	C1203	0.0379
Medium	QSLIPFVQL	1	1	1	P54278		0	1.32954e+07	0.024	0.1078	1.98914	2	1044.61	-0.621673	102.714	0	C1203	70.37	C1203	1.4238
Medium	DASWVINGL	1	1	1	Q6IPM2		0	352404	0.024	0.1058	1.9147	2	974.494	-0.597636	94.1567	0	C1203	81.48	A6802	0.1648
Medium	VARSNILTL	1	1	1	Q92973		0	1.46375e+06	0.025	0.1147	2.83706	2	986.599	-0.556273	63.5492	0	C1203	92.59	C1203	0.0198
Medium	RKNPVQEQTY	1	1	1	Q8N9N2		0	1.28566e+06	0.025	0.1135	2.52859	3	1262.65	0.0452072	31.3071	0	C1203	34.29	B1503	0.0872
Medium	SQRDGDASL	1	1	1	Q9NQW6		0	2.98614e+06	0.025	0.1105	2.48236	2	948.438	-0.260945	26.6972	0	C1203	40.74	B1503	0.1036
Medium	SAFPEVRSL	5	1	1	Q6YHU6		0	3.00553e+06	0.025	0.1121	2.48221	2	1005.54	1.58141	65.483	0	C1203	92.59	C1203	0.0047
Medium	RVNEPSIL	2	1	1	O14791		0	3.57756e+06	0.025	0.1147	2.46096	2	927.525	-0.840179	54.7004	0	C1203	43.33	C1203	1.9572
Medium	HKFSSAIGL	2	1	1	O15427		0	4.69026e+06	0.025	0.1107	2.39964	2	959.53	-1.39932	51.6668	0	C1203	48.15	B1503	0.3735
Medium	GAYGKVFLV	11	2	2	O75676;O75582		0	7.90802e+06	0.025	0.1123	2.36653	2	953.545	-0.514702	70.8217	0	C1203	85.19	C1203	0.2158
Medium	EGSPIKVTL	1	1	1	P06748		0	4.9924e+06	0.025	0.1106	2.08498	2	943.545	-0.620654	63.8964	0	C1203	55.56	A6802	0.9265
Medium	ETAKLIEKL	4	1	1	P13639		0	8.22399e+07	0.025	0.1112	2.07063	2	1044.63	-2.16168	51.1588	0	C1203	74.07	A6802	0.0498
Medium	HSAAPSPQV	2	1	1	Q92614		0	8.16257e+06	0.025	0.1135	1.99259	2	893.448	0.0986456	34.8888	0	C1203	70.37	A6802	0.0701
Medium	EVTPPVLSV	1	1	1	Q6PJG2		0	1.14729e+06	0.025	0.1114	1.98628	2	940.535	-0.454851	79.1881	0	C1203	51.85	A6802	0.0059
Medium	ASVCWLPLL	2	1	1	P21731		0	8.20312e+06	0.025	0.1108	1.94061	2	1001.55	-0.513063	104.735	0	C1203	70.37	C1203	5.3115
Medium	DVAQIIIRI	2	1	1	Q7L622		0	1.07847e+06	0.025	0.1147	1.92191	2	1040.65	-0.96097	88.0359	0	C1203	40.74	A6802	0.0471
Medium	HTADIQSEV	2	1	1	P08581		0	5.62646e+06	0.025	0.1135	1.65633	2	999.474	-0.460096	41.3975	0	C1203	77.78	A6802	0.0032
Medium	DVVTPLWTV	1	1	1	Q8IZ69		0	430108	0.025	0.1137	1.57264	2	1029.56	-0.593083	99.5831	0	C1203	40.74	A6802	0.017
Medium	VHPPPTTTY	1	1	1	Q969N2		0	7.08685e+06	0.026	0.1193	2.50746	2	1012.51	-0.148291	41.9215	0	C1203	51.85	B1503	0.1327
Medium	TTVELANKV	3	1	1	O75533		0	2.68452e+07	0.026	0.1165	2.50347	2	974.553	1.20337	48.5499	0	C1203	70.37	A6802	0.0153
Medium	EVTLIHSQV	2	1	1	Q9BRQ8		0	3.24847e+06	0.026	0.1178	2.38797	2	1025.56	-1.26214	56.1672	0	C1203	37.04	A6802	0.0563
Medium	VAHGKSTVV	3	2	2	Q2VIR3;P41091		0	1.68193e+06	0.026	0.119	2.33011	2	897.515	-0.108057	21.2718	0	C1203	85.19	C1203	0.1079
Medium	GAYGEPRVK	1	1	1	Q15392		0	1.61777e+06	0.026	0.1179	2.25055	2	976.521	-0.371506	29.9969	0	C1203	55.56	C1203	5.8378
Medium	TQRPADVIF	1	1	1	P33993		0	2.26392e+06	0.026	0.1184	2.21624	2	1046.56	-1.68788	62.0048	0	C1203	40.74	B1503	0.0075
Medium	SQVPTQmSF	3	1	1	Q8TEL6	M7(Oxidation)	0	2.35814e+06	0.026	0.1167	2.18805	2	1040.47	-0.976074	53.7962	0	C1203	37.04	B1503	0.0021
Medium	RQNIGVATF	1	1	1	Q9NTJ3		0	2.1924e+06	0.026	0.12	2.13912	2	1005.55	-1.08887	57.1341	0	C1203	37.04	B1503	0.0018
Medium	SAYANAKKY	1	1	1	O60524		0	477365	0.026	0.1166	2.13357	2	1015.52	-0.723969	26.0083	0	C1203	81.48	C1203	0.0878
Medium	HSAEILAEI	2	1	1	Q6FI81		0	9.74818e+07	0.026	0.1202	2.03994	2	982.521	0.623287	67.486	0	C1203	70.37	A6802	0.018
Medium	KKVEGTAF	2	1	1	P01024		0	892630	0.027	0.1255	2.54396	2	879.493	-0.179158	29.9476	0	C1203	26.67	B1503	0.3444
Medium	GQTGSGKTF	2	3	3	Q9NS87;Q6ZMV9;Q9BW19		0	835942	0.027	0.1231	2.46142	2	882.432	-0.120329	23.8182	0	C1203	40.74	B1503	0.0231
Medium	EAVAVIENI	1	1	1	Q9Y2L8		0	954805	0.027	0.1252	2.41567	2	957.525	0.194134	76.8292	0	C1203	70.37	A6802	0.0587
Medium	FSVITVIGAL	1	1	1	Q53R12		0	2.88281e+06	0.027	0.1239	2.3464	2	1019.61	-0.456601	79.9016	0	C1203	57.14	A6802	3.8071
Medium	AKFKSSIY	1	1	1	Q9Y6V7		0	2.33956e+06	0.027	0.1258	2.21892	2	943.525	0.254024	38.9483	0	C1203	40	B1503	0.3481
Medium	QAFKGVIYL	1	1	1	Q6DN12		0	2.21844e+06	0.027	0.1249	2.2062	2	1038.6	-0.320924	75.572	0	C1203	85.19	C1203	0.0207
Medium	GQRGSGSSF	1	1	1	Q9UBS3		0	1.06015e+06	0.027	0.1212	2.18173	2	882.406	-0.185517	21.4062	0	C1203	33.33	B1503	0.0059
Medium	IQAGIFQEF	1	1	1	O60671		0	626390	0.027	0.1256	1.91568	2	1052.54	-0.450612	90.8597	0	C1203	40.74	B1503	0.0062
Medium	IPSEIQVFV	1	1	1	Q15646		0	1.29423e+06	0.027	0.1208	1.47148	2	1031.58	-0.142824	91.2147	0	C1203	48.15	A6802	0.7151
Medium	STFSGIKEL	2	1	1	Q8N3U4		0	3.49192e+06	0.028	0.1296	2.89505	2	981.526	0.572679	61.4988	0	C1203	85.19	C1203	0.0262
Medium	IQHPSNVL	2	1	1	P14866		0	8.07487e+06	0.028	0.1289	2.67119	2	907.499	-0.27007	45.1492	0	C1203	40	B1503	0.9671
Medium	ESQVQKDGV	2	1	1	Q96B23		0	421840	0.028	0.1313	2.27016	2	989.489	-0.376743	27.8757	0	C1203	66.67	A6802	3.5722
Medium	RKTEPATGF	3	1	1	Q16531		0	1.29239e+06	0.028	0.1287	2.26816	2	1006.53	-2.12981	31.741	0	C1203	33.33	B1503	0.0357
Medium	DSGPVNISV	1	1	1	Q9NWD8		0	1.7972e+06	0.028	0.1329	2.24705	2	887.447	-0.119847	68.7439	0	C1203	77.78	A6802	0.1881
Medium	EVFGRVQGV	1	1	1	P14621		0	1.56914e+06	0.028	0.132	2.23046	2	990.536	-0.648057	55.5276	0	C1203	48.15	A6802	0.0079
Medium	FIIDDKGIL	2	2	2	Q06830;Q13162		0	907763	0.028	0.1327	2.18339	2	1033.59	-0.766923	82.025	0	C1203	44.44	C1203	0.5662
Medium	RKLTPGEVY	2	1	1	Q15818		0	2.14688e+06	0.028	0.1259	2.17997	2	1062.59	-3.07862	41.051	0	C1203	40.74	B1503	0.0182
Medium	EVPDIEPAAL	1	1	1	Q9H211		0	2.93362e+06	0.028	0.1266	2.11368	2	1053.55	-0.597415	79.5555	0	C1203	40	A6802	0.2389
Medium	FSSGAIQVV	1	1	1	O75643		0	2.38732e+06	0.028	0.1304	2.05389	2	907.488	-0.483381	70.2415	0	C1203	85.19	C1203	0.2378
Medium	SQVPKATSF	1	1	1	Q8IZP9		0	2.20835e+06	0.028	0.1328	2.03312	2	964.509	-0.619375	45.7587	0	C1203	37.04	B1503	0.002
Medium	KLAVPSLIY	1	1	1	P78381		0	1.35904e+06	0.028	0.1312	2.01538	2	1003.62	-0.2855	78.7407	0	C1203	44.44	B1503	0.1413
Medium	SQYSDPKSH	1	1	1	O75449		0	399159	0.028	0.1286	1.92703	2	1048.47	-0.604406	18.6441	0	C1203	14.81	B1503	0.3941
Medium	YTFPQILGV	1	1	1	Q8N8U2		0	669077	0.028	0.1283	1.78922	2	1037.57	-1.12187	101.382	0	C1203	88.89	A6802	0.0042
Medium	SKTVSKQQY	2	1	1	Q96GZ6		0	384826	0.028	0.1298	1.60791	2	1068.57	-0.470356	19.3219	0	C1203	37.04	B1503	0.6348
Medium	YHLGVVEAY	1	1	1	Q08211		0	658494	0.029	0.1374	2.70139	2	1050.52	-0.515321	65.2944	0	C1203	48.15	B1503	0.1626
Medium	LTTAPPPGL	6	1	1	Q14332		0	4.14821e+06	0.029	0.1371	2.5073	2	866.498	-0.099009	67.2582	0	C1203	70.37	A6802	0.6468
Medium	EVFGLVQQL	4	1	1	O75592		0	1.19534e+06	0.029	0.1336	2.46445	2	1032.57	-0.0348701	91.724	0	C1203	48.15	A6802	0.0288
Medium	NTLQTKVQL	3	1	1	Q9NT22		0	1.40074e+07	0.029	0.1375	2.28892	2	1044.61	3.5868	102.81	0	C1203	70.37	A6802	0.6562
Medium	SAGEPRVL	1	1	1	Q9BRA0		0	1.55241e+06	0.029	0.1353	1.70533	2	828.457	-0.142808	42.1311	0	C1203	76.67	C1203	5.4911
Medium	VKNLNGKSY	1	1	1	Q9HB71		0	405749	0.03	0.1432	2.65148	2	1022.56	-0.573859	25.9813	0	C1203	44.44	B1503	0.0643
Medium	GKAFNGKAY	1	1	1	Q3ZCT1		0	697287	0.03	0.1424	2.58646	2	955.499	-0.330846	29.1267	0	C1203	44.44	B1503	0.0941
Medium	YAVDRAITH	2	1	1	P14866		0	1021552	0.03	0.1405	2.46161	2	1045.54	-0.839493	39.0276	0	C1203	51.85	C1203	0.5525
Medium	TASDKILIV	1	1	1	Q9P2L0		0	2.56124e+06	0.03	0.1426	2.29441	2	959.577	-0.280753	64.1483	0	C1203	88.89	C1203	0.2705
Medium	EQYEQILAF	3	2	2	Q2VIR3;P41091		0	3.50269e+06	0.03	0.1397	2.2705	2	1140.56	-1.09201	89.8775	0	C1203	44.44	B1503	0.007
Medium	IKVIPTLAL	1	1	1	O14530		0	420321	0.03	0.1421	2.17943	2	967.655	-0.446079	83.4183	0	C1203	40.74	B1503	0.288
Medium	ETANKIFmV	2	1	1	Q14680	M8(Oxidation)	0	9.71724e+06	0.03	0.1388	2.17916	2	1068.54	-0.561834	62.7556	0	C1203	74.07	A6802	0.005
Medium	ELTPVAIQA	1	1	1	Q16881		0	1.7537e+06	0.03	0.1424	2.15421	2	941.53	-0.400954	71.1157	0	C1203	11.11	A6802	0.3935
Medium	YIFEEPFTI	2	1	1	P08237		0	323115	0.03	0.1411	1.52663	2	1158.57	-0.181688	102.968	0	C1203	48.15	A6802	0.036
Medium	GKYPSWTFY	1	1	1	P04040		0	205175	0.03	0.1408	1.23541	2	1148.54	1.3137	76.3502	0	C1203	48.15	B1503	0.0371
Medium	AKGAPTSTVY	1	1	1	Q8IW00		0	1.7638e+06	0.031	0.1453	2.66538	2	994.52	-0.847094	42.9521	0	C1203	45.71	B1503	0.052
Medium	SHKPSGLVm	3	1	1	Q02750	M9(Oxidation)	0	751219	0.031	0.1471	2.53477	2	971.498	0.047456	27.7661	0	C1203	44.44	B1503	0.3362
Medium	AAYGNVIVA	1	1	1	Q8NFZ4		0	4.37717e+06	0.031	0.1448	2.30446	2	877.478	-0.20924	64.7069	0	C1203	59.26	C1203	0.1775
Medium	SAFATPFLV	4	1	1	P15954		0	2.09159e+07	0.031	0.146	2.24027	2	952.512	-1.65419	97.6201	0	C1203	81.48	A6802	0.086
Medium	ETADTAHGV	1	1	1	Q5JSZ5		0	3.83018e+06	0.031	0.1471	2.13866	2	900.406	-0.251135	26.3249	0	C1203	74.07	A6802	0.0034
Medium	NTYGFPIIF	1	1	1	P11498		0	806497	0.031	0.1465	1.65164	2	1071.55	-0.0376846	107.025	0	C1203	74.07	C1203	0.073
Medium	EVIGSGATAVV	1	2	2	O95747;Q9UEW8		0	1.60082e+06	0.032	0.1539	2.52968	2	1002.55	-0.713447	65.0766	0		0	A6802	0.428
Medium	SKGPVVQY	1	1	1	Q15047		0	1.28779e+06	0.032	0.151	2.51222	2	877.478	-0.267401	41.6819	0	C1203	33.33	B1503	0.8463
Medium	HKVISGTTL	2	1	1	Q9NUL3		0	2.75382e+06	0.032	0.1532	2.38559	2	955.557	-0.0270315	38.157	0	C1203	40.74	B1503	0.2142
Medium	EAVHQTTQV	2	1	1	P53597		0	1.51631e+06	0.032	0.1523	2.26609	2	1012.51	-0.528074	29.1829	0	C1203	74.07	A6802	0.1036
Medium	STADFQVGV	1	1	1	Q9BYK8		0	3.46127e+06	0.032	0.1528	2.01954	2	923.447	-0.115174	66.9699	0	C1203	77.78	A6802	0.0029
Medium	DAFPKRIL	2	1	1	O14628		0	1.29638e+06	0.032	0.1548	1.99145	2	959.567	-0.405568	75.9604	0	C1203	83.33	C1203	5.4072
Medium	EGVDIILGV	2	1	1	P11171		0	1.75459e+06	0.032	0.1521	1.96309	2	914.519	-0.117687	93.8373	0	C1203	48.15	A6802	0.0662
Medium	EAFYNVITV	2	1	1	Q5JPI3		0	2.36451e+06	0.032	0.1502	1.94286	2	1055.54	-1.50552	89.3359	0	C1203	88.89	A6802	0.032
Medium	ETFFGVQWV	1	1	1	P32970		0	885456	0.032	0.1515	1.90122	2	1112.54	-0.536032	105.032	0	C1203	74.07	A6802	0.0235
Medium	EVSKAIINI	1	1	1	Q9NXP7		0	7.61791e+06	0.033	0.1573	2.2293	2	986.587	-1.60846	64.3173	0	C1203	40.74	A6802	0.0225
Medium	AHSPASLSF	1	1	1	Q9UKK3		0	3.05561e+06	0.033	0.1599	2.15431	2	916.452	-0.558103	55.7308	0	C1203	48.15	B1503	0.0424
Medium	ESFDGSVRA	1	1	1	P19338		0	7.66218e+06	0.033	0.1585	2.10615	2	967.447	-0.963584	42.1781	0	C1203	40.74	A6802	0.06
Medium	EVAEAIQTV	1	1	1	O95625		0	2.6802e+06	0.033	0.1565	1.90242	2	959.505	0.0540541	59.6404	0	C1203	51.85	A6802	0.0026
Medium	EATGLTTTQV	1	2	2	Q15475;Q9NPC8		0	2.13652e+06	0.034	0.1619	2.38205	2	1020.52	-0.798813	53.2619	0	C1203	57.14	A6802	0.5749
Medium	GQKKQVTVY	1	1	1	Q03468		0	2.2743e+06	0.034	0.1628	2.29527	2	1050.59	-0.548044	27.9986	0	C1203	44.44	B1503	0.0093
Medium	YTFDmVFGA	2	1	1	P52732	M5(Oxidation)	0	649263	0.034	0.1653	2.14925	2	1066.45	-0.621684	85.9425	0	C1203	44.44	A6802	0.0186
Medium	FASEYPLIL	1	1	1	Q9UPR0		0	1.54003e+06	0.034	0.1632	2.07337	2	1052.57	-0.44444	97.5748	0	C1203	92.59	C1203	0.0334
Medium	SVYPNGHFV	2	1	1	Q8TF46		0	5.51718e+06	0.034	0.1646	1.88939	2	1019.49	-1.17467	56.216	0	C1203	48.15	A6802	0.0121
Medium	TTFGSRVNV	2	1	1	Q9P265		0	3.89121e+06	0.034	0.1648	1.88734	2	980.513	-2.64861	49.5356	0	C1203	77.78	A6802	0.0068
Medium	FAADIISVL	1	1	1	Q13200		0	4.30404e+06	0.034	0.1611	1.80021	2	948.54	-0.154668	100.761	0	C1203	92.59	C1203	0.0035
Medium	AAmPRPVSY	2	1	1	Q6TFL4	M3(Oxidation)	0	1.4488e+06	0.034	0.1652	1.73343	2	1007.5	-0.0148206	40.4281	0	C1203	92.59	C1203	0.0044
Medium	GKAGQGKSY	1	1	1	P33076		0	1.8197e+06	0.035	0.1732	2.8163	2	895.463	-0.338458	16.5199	0	C1203	48.15	B1503	0.1354
Medium	GKAFSQSAY	1	3	3	Q6ZN57;O14709;Q9NQZ8		0	1.40538e+06	0.035	0.1692	2.6128	2	958.462	-0.470918	38.2735	0	C1203	40.74	B1503	0.1011
Medium	GQTGSGKTY	2	7	7	Q96FN5;Q86VH2;Q8N4N8;O95239;Q2VIQ3;Q2M1P5;Q9P2P6		0	897961	0.035	0.1723	2.48318	2	898.426	-0.0802511	18.7927	0	C1203	48.15	B1503	0.0258
Medium	SVFPGARLL	1	1	1	Q86X55		0	1.4514e+06	0.035	0.166	2.34449	2	959.567	-0.596389	76.0438	0	C1203	51.85	C1203	0.0065
Medium	GSFGKVFLV	1	3	3	Q15418;P51812;Q9UK32		0	6.89065e+06	0.035	0.1711	2.31745	2	953.545	-0.269154	70.4892	0	C1203	77.78	A6802	0.3151
Medium	HVFNPTFVV	1	1	1	Q92581		0	0	0.035	0.1728	2.26463	2	1059.56	-0.968773	75.8672	0	C1203	44.44	A6802	0.0082
Medium	VAKDPGTVA	2	1	1	Q92783		0	3.23824e+06	0.035	0.1723	2.21765	2	857.473	-0.209361	27.0083	0	C1203	48.15	C1203	1.1934
Medium	HAFWGGSVV	3	1	1	O75179		0	1.96641e+07	0.035	0.1679	2.15377	2	959.473	0.015603	68.6369	0	C1203	81.48	C1203	0.0458
Medium	RKPSSAAY	1	1	1	P34741		0	1.50756e+06	0.035	0.168	2.10713	2	879.468	-0.152425	18.9367	0	C1203	26.67	B1503	0.4434
Medium	GKSDPFLVF	1	3	3	Q9HCH3;Q86YQ8;Q8IYJ1		0	1.86167e+06	0.035	0.1715	1.93714	2	1009.53	-0.518716	83.0221	0	C1203	44.44	B1503	0.0196
Medium	ETARIAQLV	1	1	1	Q8NHU6		0	3.83163e+06	0.035	0.1662	1.89964	2	1000.58	-1.72944	60.2505	0	C1203	70.37	A6802	0.0164
Medium	EVLDKRYNV	1	1	1	Q13523		0	1.78078e+06	0.035	0.1727	1.58139	2	1135.61	-0.320717	44.5406	0	C1203	40.74	A6802	0.03
Medium	SQYPGAKY	1	1	1	P24928		0	3.95412e+06	0.036	0.1766	2.33502	2	913.441	0.0356331	37.0824	0	C1203	30	B1503	0.0147
Medium	ETITGQHPA	1	1	1	Q8WTW3		0	1595606	0.036	0.1784	2.29938	2	953.467	-1.32828	29.9436	0	C1203	29.63	A6802	0.1236
Medium	AAFQEEFTV	1	1	1	P51116		0	1.62323e+06	0.036	0.1763	2.26546	2	1041.49	-0.219216	78.6075	0	C1203	85.19	C1203	0.6043
Medium	VAYGAAVQA	1	6	6	P11021;P34931;P08107;P54652;P17066;P11142		0	2.78621e+06	0.036	0.1752	2.22779	2	849.446	-0.875812	49.9125	0	C1203	51.85	C1203	0.4038
Medium	ETYLNISQV	3	1	1	O94768		0	1.63716e+06	0.036	0.1755	2.21949	2	1066.54	-0.333795	76.3228	0	C1203	74.07	A6802	0.014
Medium	GKTVQIPVY	1	1	1	Q9BZX2		0	1.17046e+06	0.036	0.1764	2.16226	2	1004.58	-1.25505	60.4806	0	C1203	44.44	B1503	0.2291
Medium	AKQESTEY	1	1	1	P08670		0	315634	0.036	0.177	1.97901	2	955.436	-0.305969	22.4491	0	C1203	33.33	B1503	1.1101
Medium	ILASIFETV	2	1	1	Q8WUM9		0	680431	0.036	0.176	1.89546	2	992.566	-0.112428	97.4372	0	C1203	48.15	A6802	0.6072
Medium	SIHVGQAGV	1	5	5	Q71U36;P68363;Q9BQE3;Q13748;Q6PEY2		0	1.46565e+06	0.037	0.1824	2.68669	2	867.468	-0.025341	44.0813	0	C1203	37.04	A6802	0.6884
Medium	SQVDSKSTF	1	1	1	Q13459		0	600888	0.037	0.1791	2.3164	2	998.479	-0.266411	34.9943	0	C1203	37.04	B1503	0.0042
Medium	GKQKDGTSF	1	1	1	Q07866		0	496562	0.037	0.1814	1.90818	2	967.484	-0.0203997	20.5846	0	C1203	29.63	B1503	0.0652
Medium	KKSEGSLAY	2	1	1	Q96KP1		0	3.35237e+06	0.038	0.1907	2.6406	2	982.52	-0.360471	29.3902	0	C1203	48.15	B1503	0.0093
Medium	TSSDIQNSV	4	1	1	Q15652		0	2.42388e+06	0.038	0.1851	2.4057	2	950.442	-0.77989	42.6185	0	C1203	74.07	A6802	0.0339
Medium	GQAPPAKAA	1	1	1	P48382		0	835431	0.038	0.1848	2.3891	2	810.447	0.0810822	20.2121	0	C1203	14.81	B1503	1.1392
Medium	ESINHVVVF	2	1	1	Q53FT3		0	7.81492e+06	0.038	0.1861	2.37103	2	1043.55	-0.830089	68.4114	0	C1203	70.37	C1203	0.3417
Medium	KLLQAADSF	1	1	1	O75648		0	2.35735e+06	0.038	0.1846	2.34723	2	992.541	-0.108888	77.7233	0	C1203	29.63	B1503	0.2587
Medium	IKFFTGDVF	1	1	1	Q9UBE0		0	747019	0.038	0.1883	2.23249	2	1073.57	-0.761763	86.3971	0	C1203	37.04	B1503	0.0667
Medium	ELSNVLAAM	2	1	1	Q9Y3U8		0	859307	0.038	0.1863	2.19062	2	947.486	-0.408039	84.7029	0	C1203	33.33	A6802	0.4543
Medium	EVGPKFRGV	1	1	1	Q9Y312		0	5.44364e+06	0.038	0.1858	2.1098	2	988.557	-0.945972	44.3351	0	C1203	48.15	A6802	0.346
Medium	DAVTVVLYNV	1	1	1	P48764		0	1.95097e+06	0.038	0.1866	2.00323	2	1092.59	-0.258086	100.238	0	C1203	51.43	A6802	1.433
Medium	ASFPVALPL	1	1	1	Q96NU1		0	4.02079e+06	0.038	0.1918	1.86955	2	914.534	-0.308292	90.0446	0	C1203	85.19	C1203	0.0719
Medium	EASKVHNEI	1	1	1	Q96QT4		0	1.95596e+06	0.038	0.1882	1.7509	2	1026.52	-0.55496	25.5012	0	C1203	74.07	A6802	0.391
Medium	EAADVLIKA	5	1	1	Q7Z6Z7		0	1.5015e+07	0.038	0.1882	1.59825	2	929.529	-0.942188	55.4437	0	C1203	48.15	A6802	0.0313
Medium	DVINQTWTA	1	1	1	P62256		0	1.1934e+06	0.039	0.1942	2.36693	2	1047.51	-0.975854	71.0781	0	C1203	3.7	A6802	0.1186
Medium	KAFLNAIM	1	2	2	Q14839;Q8TDI0		0	1.64849e+06	0.039	0.1963	2.30911	2	907.507	-0.375611	71.9659	0	C1203	83.33	C1203	2.0118
Medium	ETNVDGQKV	1	1	1	Q96BD0		0	1.16972e+06	0.039	0.1938	2.21636	2	989.489	-0.561794	32.2421	0	C1203	66.67	A6802	0.4939
Medium	QLPNFAFSV	1	1	1	Q9BQ70		0	1.00587e+06	0.039	0.196	2.06868	2	1022.53	-0.154708	94.9185	0	C1203	37.04	A6802	0.4984
Medium	ETFAFIQQL	1	1	1	Q8WXH0		0	877180	0.039	0.1933	1.81692	2	1096.57	1.38063	96.1627	0	C1203	74.07	A6802	0.0148
Medium	EVHTDTNKI	1	1	1	O00299		0	319916	0.039	0.1933	1.67825	2	1056.53	-0.366757	26.8666	0	C1203	29.63	A6802	0.2904
Medium	TSGPNQPSV	1	1	1	P16989		0	2.66791e+06	0.04	0.2005	2.66456	2	886.427	0.113947	38.3708	0	C1203	74.07	A6802	1.8002
Medium	AQTTRTAY	1	1	1	P50990		0	549478	0.04	0.1998	2.30644	2	911.458	-0.228161	25.4164	0	C1203	26.67	B1503	0.246
Medium	EVDPNIQAV	2	1	1	P05787		0	6.21257e+06	0.04	0.198	2.24312	2	984.499	-0.516195	60.6307	0	C1203	48.15	A6802	0.031
Medium	QQSPGSKAF	1	1	1	Q96P71		0	830258	0.04	0.1991	2.22606	2	949.473	-1.1021	32.6412	0	C1203	44.44	B1503	0.0095
Medium	TTAEVVVTEI	1	1	1	P10809		0	1.32723e+06	0.04	0.1981	2.21919	2	1061.57	-0.0904375	74.5961	0	C1203	28.57	A6802	0.0673
Medium	EIVTIWDSV	1	1	1	Q8IWA0		0	971176	0.04	0.2012	2.1491	2	1061.55	-0.539259	95.13	0	C1203	37.04	A6802	0.101
Medium	ALFRTIITY	1	2	2	P29992;P50148		0	621801	0.04	0.1967	1.82116	2	1097.63	-0.526656	79.9382	0	C1203	55.56	B1503	0.047
Medium	NAFDGPITI	1	1	1	P16070		0	382860	0.041	0.2038	2.4513	2	947.483	-0.834623	83.7884	0	C1203	85.19	C1203	0.0211
Medium	RKVADVSQF	1	1	1	Q5TKA1		0	2.06047e+06	0.041	0.2019	2.40131	2	1049.57	-1.48449	40.9263	0	C1203	33.33	B1503	0.0096
Medium	KKGGPGVAL	2	1	1	P08047		0	2.99376e+06	0.041	0.203	2.16827	2	826.515	0.224765	32.4107	0	C1203	44.44	B1503	0.4614
Medium	DVFTQFYEA	1	1	1	Q9Y6D5		0	161738	0.041	0.2045	1.82339	2	1119.5	-0.686508	90.9913	0	C1203	7.41	A6802	0.1083
Medium	RKAYSTTSI	1	1	1	Q86Y39		0	663957	0.042	0.209	2.38441	2	1026.56	-0.785992	32.431	0	C1203	33.33	B1503	0.5535
Medium	ESNYVNILA	1	1	1	Q9H8V3		0	6.93149e+06	0.042	0.2106	2.00183	2	1022.52	-0.32282	75.8429	0	C1203	33.33	A6802	0.2952
Medium	HSSGINVNA	3	1	1	Q14444		0	1.7061e+08	0.042	0.2087	2.00073	2	898.436	-1.51749	34.5453	0	C1203	40.74	A6802	0.3376
Medium	MSTRVCTLL	1	1	1	A6NL08		0	571610	0.042	0.2121	1.78673	2	1023.53	-1.87005	106.334	0	C1203	66.67	A6802	3.6041
Medium	AKKEKEPEY	1	1	1	O95793		0	356333	0.042	0.2101	1.49026	2	1121.58	0.132494	17.8302	0	C1203	48.15	B1503	0.1885
Medium	ETFHDIAQV	1	1	1	Q9BRR6		0	2.29081e+07	0.043	0.2153	2.49516	2	1059.51	0.187338	59.864	0	C1203	74.07	A6802	0.005
Medium	HVYSGKDLI	1	1	1	Q9NR30		0	1.09983e+06	0.043	0.2138	2.23549	2	1031.55	-0.830051	47.3782	0	C1203	37.04	A6802	0.2075
Medium	mVASVDVSI	1	1	1	Q14517	M1(Oxidation)	0	752321	0.043	0.2161	2.20391	2	936.467	-3.67827	80.1098	0	C1203	40.74	A6802	0.0091
Medium	DTPFIFAEV	1	1	1	P22735		0	1.0272e+06	0.043	0.2162	1.71935	2	1038.51	-0.315533	102.48	0	C1203	70.37	A6802	0.0311
Medium	GKREGIDQSY	1	1	1	O94952		0	1.64599e+06	0.044	0.2204	2.35196	2	1152.56	-0.354737	30.8976	0	C1203	40	B1503	0.245
Medium	EAFGQSFSI	1	1	1	Q96G01		0	623443	0.044	0.2223	2.13445	2	985.462	-0.566844	82.0171	0	C1203	74.07	A6802	0.0271
Medium	QKIQQLTAL	1	1	1	Q99471		0	956548	0.044	0.2188	2.11125	2	1042.63	-0.141461	58.7385	0	C1203	37.04	B1503	0.461
Medium	SVAKESIPL	1	1	1	A6NHX0		0	983189	0.044	0.2224	2.00625	2	943.545	-1.46159	55.1618	0	C1203	44.44	A6802	0.4721
Medium	YKVISNEF	1	1	1	Q05086		0	400002	0.044	0.2219	1.42381	2	999.514	-0.637996	79.8782	0	C1203	43.33	B1503	1.0162
Medium	LKTEGVSPY	1	1	1	Q9H2F9		0	2.2563e+06	0.045	0.2241	2.14245	2	993.524	-0.775697	44.617	0	C1203	44.44	B1503	0.1044
Medium	GKYGEGAKQETF	1	1	1	P78383		0	1.56998e+06	0.045	0.2249	2.12078	3	1314.63	-0.278825	35.4415	0		0	B1503	0.9609
Medium	EQSSVLITL	1	1	1	O75691		0	331350	0.045	0.2231	2.09402	2	989.551	-0.815109	83.9962	0	C1203	51.85	B1503	0.956
Medium	QKKDTGHVY	1	1	1	Q15208		0	1.49763e+06	0.045	0.2255	2.08145	2	1075.55	-0.646679	15.459	0	C1203	44.44	B1503	0.0992
Medium	GLASLEQLY	1	1	1	Q92626		0	3.05535e+06	0.045	0.2258	1.96768	2	993.524	-0.898563	44.6087	0	C1203	44.44	B1503	1.1196
Medium	LQSLITLMEY	1	1	1	Q69YN4		0	7.16316e+06	0.045	0.2255	1.82451	3	1210.64	-2.54864	40.2209	0	C1203	31.43	B1503	1.4073
Medium	RSYPGLLVV	1	1	1	Q86WG5		0	1.63179e+06	0.045	0.2244	1.64025	2	1003.59	-0.282004	73.304	0	C1203	85.19	C1203	0.0275
Medium	AKYKNQVVY	1	1	1	Q9NVR2		0	1.34212e+06	0.046	0.2297	2.41481	2	1112.61	-1.07956	35.0981	0	C1203	51.85	B1503	0.0038
Medium	SKRTGVQTF	1	1	1	P53621		0	1.71311e+07	0.046	0.2293	2.33671	2	1023.56	-1.48802	30.112	0	C1203	37.04	B1503	0.0122
Medium	KQRPGQQVA	1	1	1	O75534		0	1.17144e+06	0.046	0.2278	2.06183	2	1011.57	-0.549686	15.1634	0	C1203	11.11	B1503	0.7299
Medium	AQFIGPLVF	1	1	1	Q9H2J4		0	338703	0.046	0.2312	1.80294	2	991.561	-0.530266	103.082	0	C1203	48.15	B1503	0.0017
Medium	STADTSKVSL	1	1	1	P04035		0	892684	0.047	0.234	2.45157	2	1008.52	-0.50572	42.2703	0	C1203	54.29	A6802	0.256
Medium	LASVTDSTQV	1	1	1	Q96I51		0	2.2267e+06	0.047	0.2346	1.93771	2	1020.52	-0.260542	53.7726	0	C1203	51.43	A6802	5.2184
Medium	TASELIGNEL	1	1	1	Q96QE3		0	2.64726e+06	0.048	0.2401	2.3117	2	1046.54	-0.637436	83.0102	0	C1203	60	A6802	1.1875
Medium	ALRKSEIEY	2	1	1	P62888		0	3.55484e+06	0.048	0.2412	2.23207	2	1108.6	-1.06708	39.0271	0	C1203	48.15	B1503	0.3117
Medium	SLTNVVGHSL	1	1	1	O75569		0	770829	0.048	0.2376	2.18592	2	1026.56	-0.320083	31.8449	0	C1203	34.29	A6802	1.9251
Medium	TKISTQLDF	1	1	1	P12270		0	299544	0.049	0.2446	2.58577	2	1052.56	-4.27952	63.9832	0	C1203	37.04	B1503	0.1999
Medium	ESSKVVKKV	1	1	1	Q2NL82		0	2.87925e+06	0.049	0.2419	2.25481	2	1003.61	-0.790279	18.3381	0	C1203	77.78	A6802	0.4964
Medium	MQNIDmPELF	1	1	1	Q9NY74	M6(Oxidation)	0	4.03801e+06	0.049	0.2471	2.04017	2	1253.55	-3.13334	74.0693	0	C1203	34.29	B1503	0.5592
Medium	ETQPKQTSV	1	1	1	P15822		0	1.83405e+06	0.049	0.2456	2.02429	2	1017.52	-0.585628	26.5862	0	C1203	74.07	A6802	0.1557
Medium	IASPVIAAV	1	1	1	Q6ZMZ0		0	2.69436e+06	0.049	0.2422	2.01692	2	840.519	-0.0878481	74.6885	0	C1203	88.89	C1203	0.0227
Medium	ESAGPSRAV	1	1	1	P50402		0	3.66716e+06	0.049	0.2459	1.82823	2	873.443	0.105578	27.75	0	C1203	77.78	A6802	0.0637

## Sheet: Statistics
Total_Peptides	Tool	A*68:02	B*15:03	C*12:03
1737	Total Syfpeithi allelecoverage with threshold	0	0	532
	Total Syfpeithi allelecoverage with threshold %	0.0000	0.0000	0.3063
	Total NetMHC allelecoverage with threshold	0	0	0
	Total NetMHC allelecoverage with threshold %	0.0000	0.0000	0.0000
	Total NetMHC allelecoverage with 50nM threshold	0	0	0
	Total NetMHC allelecoverage with 50nM threshold %	0.0000	0.0000	0.0000
	Best Syfpeithi	0	0	1640
	Best Syfpeithi %	0.0000	0.0000	0.9442
	Best NetMHC	0	0	0
	Best NetMHC %	0.0000	0.0000	0.0000
	Best Syfpeithi with threshold	0	0	532
	Best Syfpeithi with threshold %	0.0000	0.0000	0.3063
	Best NetMHC with threshold	0	0	0
	Best NetMHC with threshold %	0.0000	0.0000	0.0000
	Best NetMHC with 50nM threshold	0	0	0
	Best NetMHC with 50nM threshold %	0.0000	0.0000	0.0000
