# Supplementary material for: TAPBPR mediates peptide dissociation from MHC class I using a leucine lever
Source: eLife. 2018 Nov 28;7:e40126. doi: 10.7554/eLife.40126 (PMC6307860; doi:10.7554/eLife.40126)
Supplement: Figure 5—source data 3. [file elife-40126-fig5-data3.xlsx]

## Sheet: Filteredpeptides
A6	Sequence	# PSMs	# Proteins	# Protein Groups	Protein Group Accessions	Modifications	ΔCn	Area	q-Value	PEP	XCorr	Charge	MH+ [Da]	ΔM [ppm]	RT [min]	# Missed Cleavages	best_Syf_Allele	best_Syf_Score	best_NetMHC_Allele_Rank	best_NetMHC_Rank
High	SKLPIGDVATQY	14	1	1	Q99832		0	7.30708e+06	0	1.594e-06	4.85836	2	1291.69	-0.404895	65.9838	0		0	B1503	1.2346
High	KKFFGEFTGF	23	1	1	Q15029		0	1.21208e+07	0	4.779e-05	4.32636	2	1207.61	-0.614517	73.2475	0	C1203	42.86	B1503	0.4285
High	YGYDNVKEY	15	1	1	Q96GN5		0	8.23146e+06	0	1.071e-05	4.2769	2	1150.5	-0.713809	50.4475	0	C1203	59.26	C1203	0.0081
High	NAYDFIMKL	31	1	1	P08183		0	2.86488e+07	0	0.0001534	4.08776	2	1114.56	-0.514453	89.447	0	C1203	85.19	C1203	0.0092
High	GQYGNPLNKY	49	1	1	O14672		0	1.55614e+08	0	0.0002752	4.05288	2	1153.56	-1.18575	52.2058	0	C1203	34.29	B1503	0.0242
High	FQFGSSTTNF	6	1	1	P49790		0	1.67596e+06	0	0.0001961	4.04461	2	1135.51	-0.287756	77.4547	0	C1203	45.71	B1503	0.0697
High	YKIGDLTGY	19	1	1	Q9NVN8		0	5.8938e+07	0	0.0001116	3.99093	2	1029.52	-1.15385	66.5652	0	C1203	44.44	B1503	0.0506
High	QQFLIQQQY	7	1	1	Q6Y7W6		0	2.81363e+06	0	0.0004568	3.94946	2	1195.61	-1.00259	71.7931	0	C1203	40.74	B1503	0.0189
High	IKENPSSQY	17	1	1	O75496		0	2.84706e+06	0	9.233e-05	3.94135	2	1065.52	-0.664426	33.8031	0	C1203	37.04	B1503	0.2086
High	AKWNPTAGVAF	24	1	1	P19387		0	1.46732e+07	0	0.0002197	3.93199	2	1161.6	-0.972616	70.8703	0		0	B1503	0.5535
High	KQFPEVIKY	31	1	1	Q9UIF9		0	3.1424e+07	0	0.000221	3.90059	2	1151.65	-0.776428	56.5817	0	C1203	55.56	B1503	0.0014
High	IKYDPSIGIY	12	1	1	P62913		0	4.03131e+06	0	5.462e-06	3.88566	2	1168.62	-0.484436	68.927	0	C1203	42.86	B1503	0.0478
High	TTYEGIFKTL	18	1	1	Q8WWM7		0	7.35794e+06	0	0.0001317	3.86887	2	1172.62	-0.939229	77.7031	0	C1203	54.29	A6802	0.1132
High	ALIEFIRSEY	27	1	1	P26639		0	2.74108e+07	0	2.095e-05	3.85727	2	1240.66	-0.481592	81.2148	0	C1203	31.43	B1503	1.0203
High	LANGEVRIY	8	1	1	Q8NFJ9		0	2.27631e+06	0	0.0001544	3.85267	2	1034.56	-0.989842	55.1711	0	C1203	85.19	C1203	0.4983
High	AKVDLNSNGF	7	1	1	P13797		0	2.46996e+06	0	1.726e-05	3.84237	2	1064.54	-0.56802	53.3803	0	C1203	37.14	B1503	0.644
High	GKLPAGGVLY	18	1	1	P48634		0	9428197	0	0.0006614	3.83032	2	974.566	-0.739361	59.631	0	C1203	34.29	B1503	0.1953
High	VGVDFALKV	19	1	1	O14966		0	8.29472e+06	0	0.0005438	3.82628	2	947.556	-0.540031	77.318	0	C1203	48.15	C1203	1.2819
High	EAFQGTKVFV	16	1	1	P61289		0	8.94639e+06	0	0.0004381	3.81566	2	1125.59	-0.127667	65.1085	0	C1203	68.57	A6802	0.1825
High	EVFEDAAEIRL	11	1	1	P19338		0	3.87687e+06	0	4.45e-05	3.80384	2	1291.65	-0.418031	78.3088	0		0	A6802	0.803
High	RQYGSEGRFTF	19	2	2	Q7Z7H5;Q9BVK6		0	7.45054e+06	0	0.0005606	3.79536	3	1347.64	-0.765616	53.2366	0		0	B1503	0.1337
High	YQYLEQSKY	3	1	1	Q9BTE7		0	1.90781e+06	0	0.000121	3.7865	2	1221.58	-0.475427	51.8187	0	C1203	44.44	B1503	0.0039
High	AAASAIKVI	20	1	1	P14902		0	1.19555e+07	0	0.0001568	3.78126	2	843.529	-0.564048	54.1204	0	C1203	88.89	C1203	0.427
High	VKFGGQLLSF	15	1	1	Q08945		0	2.28281e+06	0	0.0002138	3.78051	2	1095.62	0.591105	83.5011	0	C1203	51.43	B1503	0.1139
High	GKYFGGVLEY	28	1	1	O94955		0	2.07083e+07	0	0.0005374	3.77963	2	1132.57	-1.02563	72.1447	0	C1203	40	B1503	0.08
High	KLFGSTSSF	31	1	1	P08174		0	4.03246e+07	0	0.0002707	3.75879	2	973.499	-0.0753665	61.9886	0	C1203	37.04	B1503	0.0127
High	IKADHVSTY	13	1	1	P20036		0	2.53114e+06	0	5.074e-05	3.7481	2	1033.53	0.104853	33.4957	0	C1203	51.85	B1503	0.0024
High	AKKISQLGY	15	1	1	P26196		0	3.49515e+06	0	0.001853	3.74575	2	1007.59	-0.681014	39.022	0	C1203	44.44	B1503	0.2744
High	IGVDFALKV	15	2	2	Q13637;P57729		0	5.58813e+06	0	0.0001963	3.73664	2	961.571	-0.558158	80.9851	0	C1203	44.44	C1203	1.1246
High	GKYGTLQEF	25	1	1	O75182		0	2.62453e+07	0	0.001684	3.73133	2	1042.52	-1.39355	56.9185	0	C1203	40.74	B1503	0.0148
High	AAANAIRVY	8	1	1	Q9NRK6		0	3.06409e+06	0	0.0002965	3.72645	2	948.525	-0.912096	49.0218	0	C1203	92.59	B1503	0.0849
High	ETADVIAKVAF	8	1	1	O43617		0	1.65577e+06	0	0.0002172	3.72616	2	1163.63	0.255875	74.3548	0		0	A6802	1.3198
High	GKIGTVmTF	31	1	1	P30046	M7(Oxidation)	0	5617811	0	0.001736	3.723	2	969.507	-0.381285	56.5228	0	C1203	40.74	B1503	0.013
High	GKVGGLLAF	30	1	1	P28340		0	2.11917e+07	0	0.0005307	3.72059	2	861.519	-0.338667	74.1715	0	C1203	37.04	B1503	0.0193
High	VKYIQQENF	15	1	1	Q6PJF5		0	5.98137e+06	0	0.0002294	3.71992	2	1168.6	-0.690355	54.1374	0	C1203	37.04	B1503	0.1248
High	FKFmPPPTY	25	1	1	Q9H3M7	M4(Oxidation)	0	6.12186e+06	0	7.799e-05	3.7194	2	1143.55	-0.433467	67.6257	0	C1203	51.85	B1503	0.0044
High	FSFDYIVKW	17	1	1	Q9BSJ2		0	1.8391e+06	0	9.872e-05	3.69419	2	1204.6	0.544922	95.9643	0	C1203	48.15	C1203	0.2257
High	AKYPHVEDY	38	1	1	P61289		0	9.73059e+06	0	0.001033	3.67028	2	1121.53	-0.480538	42.3296	0	C1203	55.56	B1503	0.0063
High	GQFGTINNF	18	1	1	Q14457		0	8740921	0	0.004122	3.66765	2	997.471	-2.57882	72.3135	0	C1203	40.74	B1503	0.0065
High	AAADSIKIW	11	1	1	Q9UNX4		0	5.79004e+06	0	0.0001721	3.65628	2	974.531	-0.109959	68.9081	0	C1203	55.56	C1203	1.5532
High	EIFNLKFAQA	19	1	1	P78347		0	6.60803e+06	0	0.001017	3.639	2	1180.64	0.426023	79.2295	0	C1203	8.57	A6802	1.561
High	GKVFATTGY	6	2	2	Q14957;O15399		0	2.71833e+06	0	0.001247	3.63821	2	943.488	-0.389647	49.2467	0	C1203	37.04	B1503	0.1564
High	FVNDIFERI	293	14	14	P33778;P62807;P58876;Q93079;P06899;O60814;Q99880;Q99879;Q99877;P23527;Q16778;Q5QNW6;Q8N257;P57053		0	1.22774e+09	0	0.001582	3.63621	2	1152.6	-1.00295	83.5783	0	C1203	37.04	A6802	0.0163
High	IKISEGTGF	10	1	1	Q9Y2R4		0	2.77216e+06	0	0.0001402	3.62234	2	951.514	-0.627054	56.8197	0	C1203	33.33	B1503	0.0238
High	AKYESQTSF	13	1	1	Q9P0U4		0	3.5856e+06	0	0.0008247	3.62123	2	1060.49	-1.18583	40.7265	0	C1203	40.74	B1503	0.0018
High	SKLSFSQVF	12	1	1	Q9UJX4		0	7.55339e+06	0	0.0007776	3.61945	2	1042.56	-0.70349	73.0404	0	C1203	37.04	B1503	0.031
High	KAYFDVKEY	8	1	1	Q9UJX2		0	5.30561e+06	0	4.443e-05	3.61736	2	1162.58	-1.15744	53.9582	0	C1203	88.89	C1203	0.0916
High	SAVNIIRTF	9	1	1	P29728		0	2.59028e+06	0	0.0008629	3.61438	2	1020.58	-0.632863	70.2158	0	C1203	77.78	C1203	0.0226
High	FKWSGENSY	14	1	1	Q8NI08		0	5.12193e+06	0	0.001571	3.61426	2	1117.49	-0.992656	57.0385	0	C1203	44.44	B1503	0.0393
High	GQYSPPPYSEY	22	1	1	Q96BY9		0	1.21007e+07	0	7.473e-06	3.61379	2	1287.55	-0.409776	63.2183	0		0	B1503	0.0875
High	HKFPDEDSY	52	1	1	Q6VY07		0	1.64262e+07	0	0.001188	3.61113	2	1137.48	-0.190447	41.5753	0	C1203	48.15	B1503	0.1563
High	GQYSTGKTTF	14	3	3	Q9H4M9;Q9NZN3;Q9H223		0	3.46714e+06	0	0.0008133	3.60578	2	1089.52	-0.537749	41.64	0	C1203	31.43	B1503	0.0118
High	YAIDNPLHY	12	1	1	A5YKK6		0	5.3815e+06	0	9.98e-05	3.60379	2	1105.53	-0.776273	68.628	0	C1203	88.89	C1203	0.0069
High	TKYLENQAF	15	1	1	Q99661		0	5.66001e+06	0	0.0003892	3.58401	2	1113.56	-0.976346	54.2759	0	C1203	33.33	B1503	0.0182
High	VQGIFVEKY	16	3	3	P62834;P61224;A6NIZ1		0	9.99208e+06	0	6.228e-05	3.58054	2	1082.59	-1.06194	63.4354	0	C1203	44.44	B1503	0.2769
High	TQmPDPKTF	88	1	1	Q9Y5V0	M3(Oxidation)	0	8.75247e+06	0	0.002425	3.57864	2	1080.5	-0.656514	47.2304	0	C1203	48.15	B1503	0.009
High	GKLKDPANF	4	1	1	P15559		0	1.69571e+06	0	0.004591	3.57843	2	989.541	-0.884574	41.4065	0	C1203	33.33	B1503	0.2023
High	GKVGFQSFF	15	1	1	P60903		0	6.77135e+06	0	0.00196	3.57804	2	1016.52	-0.334849	78.6437	0	C1203	33.33	B1503	0.296
High	FAIDPHLLLSV	12	1	1	Q29RF7		0	8.05646e+06	0	2.795e-05	3.57725	2	1224.7	-0.468347	100.282	0		0	A6802	1.1874
High	GKVGSQSSF	13	1	1	Q9BY84		0	1.59585e+06	0	0.003169	3.5758	2	896.447	-0.0782495	32.0788	0	C1203	33.33	B1503	0.0394
High	GKSFTSNSY	10	2	2	Q8N988;Q96NG5		0	1.6376e+06	0	0.001363	3.56494	2	990.452	-0.345457	37.2513	0	C1203	40.74	B1503	0.1071
High	RKFPAGKVPAF	30	1	1	P26641		0	7.09118e+06	0	0.003078	3.56283	3	1217.72	-0.137295	50.444	0		0	B1503	0.1649
High	LAKAWPTVL	17	1	1	P31040		0	7.61721e+06	0	0.00241	3.56046	2	998.603	0.0599371	73.3443	0	C1203	81.48	C1203	0.0648
High	VSWTGKPVSY	5	1	1	Q8TEK3		0	1.76778e+06	0	0.0001504	3.55895	2	1123.58	-0.0878455	58.5933	0	C1203	65.71	B1503	1.3936
High	VKVPTTLAEY	11	2	2	P49427;Q712K3		0	2.0363e+06	0	0.0003084	3.55795	2	1120.62	-1.49449	64.3045	0	C1203	34.29	B1503	0.232
High	AKLPFTPLSY	7	1	1	Q9UM00		0	3.46913e+06	0	0.001059	3.55578	2	1136.63	-0.325651	80.5454	0	C1203	48.57	B1503	0.0699
High	SKASQFTGY	10	1	1	O94966		0	2.40771e+06	0	0.001113	3.55174	2	988.473	-0.0870681	42.2817	0	C1203	44.44	B1503	0.0836
High	YKAAAGEDY	49	1	1	P23381		0	1.77016e+07	0	0.0005355	3.55086	2	987.441	-0.567686	34.9874	0	C1203	44.44	B1503	0.2533
High	AKVSGGPSL	15	1	1	Q9Y262		0	3.01809e+06	0	0.0005625	3.54465	2	815.462	0.0926309	38.8135	0	C1203	44.44	B1503	0.1298
High	GKYIPKQSF	22	1	1	Q9P0I2		0	1.00518e+07	0	0.0002174	3.54439	2	1067.59	-0.585569	41.8723	0	C1203	33.33	B1503	0.022
High	YQFTGIKKY	35	1	1	Q96IX5		0	5.91142e+07	0	9.729e-05	3.54437	2	1147.61	-0.824529	50.2719	0	C1203	51.85	B1503	0.0015
High	SQIRQSTAY	15	1	1	O43150		0	2.94566e+06	0	0.001256	3.54033	2	1053.53	-1.13501	33.7397	0	C1203	37.04	B1503	0.0042
High	AQYDQASTKY	6	1	1	P49454		0	1.0795e+06	0	2.074e-05	3.52948	2	1174.54	-0.197742	37.6963	0	C1203	40	B1503	0.0059
High	TKFETEQAL	8	2	2	Q04695;P08727		0	3.56466e+06	0	0.001178	3.52448	2	1066.54	-0.123638	49.3893	0	C1203	44.44	B1503	0.5272
High	KAFQKIVVL	53	2	2	Q7L1Q6;Q9Y6E2		0	2.717e+08	0	0.001746	3.52117	2	1045.68	-0.889741	59.7596	0	C1203	88.89	C1203	0.0077
High	VKVIQQESY	19	1	1	P60228		0	1.20373e+07	0	0.00153	3.51372	2	1093.59	-1.0399	44.9657	0	C1203	40.74	B1503	0.1997
High	IQKAVSEGY	15	1	1	P32320		0	4.20992e+06	0	0.0002089	3.51138	2	994.52	-0.662979	36.6246	0	C1203	37.04	B1503	0.0187
High	AQKIGIVGF	7	1	1	Q96DG6		0	1.33686e+06	0	0.0003774	3.50812	2	932.556	-0.575336	69.9697	0	C1203	40.74	B1503	0.0094
High	SAISSVRLY	15	1	1	P42285		0	5.95258e+06	0	0.001121	3.50759	2	995.551	-0.676143	61.9681	0	C1203	85.19	C1203	0.0858
High	KQFDAGTVNY	8	1	1	P52756		0	1.72683e+06	0	0.0004428	3.49816	2	1142.55	-1.21575	50.1765	0	C1203	42.86	B1503	0.0033
High	KKPITTGGVTY	19	1	1	Q14192		0	5.54328e+06	0	0.0002804	3.49642	2	1164.66	-0.682325	38.9012	0		0	B1503	0.9535
High	NVPEGLLATVTV	21	5	5	P54707;P05023;P50993;P13637;Q13733		0	4.82123e+06	0	0.0005094	3.49413	2	1212.68	-0.278913	93.2321	0		0	A6802	0.9815
High	VTYNYPVHY	12	1	1	Q9NV96		0	7.61941e+06	0	0.0001103	3.49351	2	1155.55	-0.852639	58.812	0	C1203	81.48	C1203	0.0317
High	GKLLIGTLY	20	1	1	Q15165		0	6.11366e+06	0	0.0007273	3.49112	2	977.603	-0.392392	75.8386	0	C1203	37.04	B1503	0.2399
High	TAVALLRLL	18	1	1	Q14165		0	1.79483e+06	0	0.0004751	3.48872	2	969.645	-0.46732	92.231	0	C1203	77.78	C1203	0.5334
High	KKGPSGYGF	27	1	1	O14745		0	1.81426e+07	0	0.0007975	3.48352	2	940.487	-1.53117	37.633	0	C1203	37.04	B1503	0.0927
High	FKNIQPSSF	10	1	1	Q9BVQ7		0	4.04267e+06	0	0.0001782	3.48182	2	1067.55	-0.468389	57.9729	0	C1203	37.04	B1503	0.027
High	KKHSQFIGY	28	4	4	Q58FF7;Q58FG0;P07900;P08238		0	5.52566e+06	0	0.004696	3.47177	2	1107.59	-0.487147	36.7439	0	C1203	44.44	B1503	0.0501
High	KHFGTILNY	33	2	2	Q13829;Q9H3F6		0	2.52807e+07	0	0.00374	3.4702	2	1092.58	-0.796305	56.9878	0	C1203	51.85	B1503	0.0317
High	EVYAGNFVEV	16	1	1	Q9UBS4		0	5.75332e+06	0	0.0008102	3.46651	2	1126.54	-0.550487	79.0176	0	C1203	31.43	A6802	0.0196
High	YQADIERmY	48	1	1	O95573	M8(Oxidation)	0	8.80103e+06	0	4.744e-05	3.46543	2	1204.53	-0.012672	48.5037	0	C1203	51.85	B1503	0.0096
High	YASENVNKL	8	2	2	P62820;Q9H0U4		0	2.82667e+06	0	0.0009323	3.4644	2	1037.53	-0.293771	42.1833	0	C1203	88.89	C1203	0.0115
High	MKLLTGLVF	25	2	2	P0DJI8;P0DJI9		0	8.65449e+06	0	0.001651	3.46411	2	1021.61	-0.789893	91.8636	0	C1203	37.04	B1503	0.1401
High	GKLIIWDSY	9	3	3	P62873;P62879;Q9HAV0		0	4.02311e+06	0	0.0002629	3.45807	2	1094.59	-0.492685	78.0706	0	C1203	37.04	B1503	1.0181
High	SVYEGGVFFL	21	3	3	P51965;Q96LR5;Q969T4		0	1.01946e+07	0	0.0001887	3.4553	2	1117.56	-0.033302	101.651	0	C1203	37.14	A6802	0.1933
High	GKAPGAEEY	30	1	1	P09543		0	1.29951e+07	0	0.003542	3.455	2	921.431	-0.618211	30.4085	0	C1203	51.85	B1503	0.0978
High	YAYDGKDYIAL	25	17	17	P01892;P30447;P05534;P10316;P01889;P30460;Q04826;P30479;P30480;P30486;P18464;P30490;P30498;Q31610;P30499;P04222;P17693		0	1.89484e+07	0	0.0002175	3.45208	2	1291.62	-0.559549	71.4575	0		0	C1203	0.4676
High	FASGLIHRV	60	1	1	Q8N6L1		0	2.24331e+08	0	0.0008437	3.4469	2	999.573	-0.853265	51.067	0	C1203	88.89	A6802	0.0309
High	IKISNPTEF	16	1	1	Q9BXS6		0	1.33041e+07	0	0.0005584	3.44635	2	1048.57	-1.00091	61.9798	0	C1203	40.74	B1503	0.0114
High	VKLPSGEDY	25	1	1	Q9Y2Z0		0	1.93219e+07	0	0.002747	3.44235	2	1007.5	-0.42324	52.166	0	C1203	48.15	B1503	0.276
High	NAANIFERL	11	2	2	Q9Y6D6;Q9Y6D5		0	6.08424e+06	0	0.0007129	3.43764	2	1047.56	0.167922	72.8424	0	C1203	77.78	A6802	0.1099
High	FSYAFPKAV	7	2	2	O60669;O15427		0	3.36425e+06	0	0.0003756	3.43201	2	1029.54	-0.453318	71.5833	0	C1203	81.48	C1203	0.0255
High	GQYSTGKTSF	22	1	1	Q9NZN4		0	8.16979e+06	0	3.994e-05	3.42389	2	1075.5	-0.975514	40.8855	0	C1203	34.29	B1503	0.0117
High	FTADFVRQL	14	1	1	Q96Q15		0	1.03879e+07	0	0.0007219	3.41943	2	1096.58	-0.0752252	74.8696	0	C1203	85.19	C1203	0.0142
High	GKITDFIKF	11	1	1	P62701		0	5.37965e+06	0	0.003335	3.41496	2	1068.61	-0.617068	75.6767	0	C1203	33.33	B1503	0.0648
High	GKAFFLSSY	15	1	1	O75123		0	5.30883e+06	0	0.001919	3.41223	2	1019.52	-0.170165	72.152	0	C1203	40.74	B1503	0.1579
High	LKPGMVVTF	13	2	2	P68104;Q5VTE0		0	5.61873e+06	0	0.001794	3.41079	2	991.564	-0.984408	71.5567	0	C1203	44.44	B1503	0.3724
High	KLVDFVIHF	22	1	1	P59998		0	3.51297e+06	0	5.494e-05	3.40758	2	1117.64	-0.383892	84.7062	0	C1203	40.74	B1503	0.1146
High	TVFNFQEKV	11	1	1	Q14204		0	6.23796e+06	0	0.000281	3.40664	2	1111.58	-0.756693	66.6595	0	C1203	40.74	A6802	0.0273
High	GKLGFLASY	21	1	1	Q12772		0	1.09785e+07	0	0.001078	3.40111	2	955.524	-0.462269	70.816	0	C1203	40.74	B1503	0.0566
High	GKPPFEANTY	27	1	1	O14965		0	2.47584e+07	0	0.0001828	3.3982	2	1123.54	-1.49756	51.2443	0	C1203	31.43	B1503	0.921
High	FGFPGERTY	61	1	1	Q9Y4K0		0	1.12568e+08	0	9.567e-05	3.39559	2	1073.5	-1.53305	63.7618	0	C1203	59.26	C1203	0.0252
High	SIAGIFKEV	7	1	1	Q9NQQ7		0	9.22185e+06	0	0.003493	3.39539	2	963.55	-0.632761	74.5573	0	C1203	51.85	A6802	0.0436
High	ILGPPGSVY	24	3	3	P51965;Q96LR5;Q969T4		0	1.29045e+07	0	0.003645	3.39358	2	902.498	-0.219237	70.5953	0	C1203	48.15	B1503	0.0572
High	ASFDGRISVY	4	1	1	O94979		0	2.29172e+06	0	0.002926	3.3905	2	1114.55	-1.21313	63.9729	0	C1203	80	B1503	0.1962
High	YKVEYPImY	11	1	1	O14880	M8(Oxidation)	0	4.55582e+06	0	2.302e-05	3.38791	2	1221.59	-0.0500998	67.7571	0	C1203	51.85	B1503	0.0153
High	KQIESKTAF	20	1	1	P10599		0	5.86961e+06	0	0.003103	3.38771	2	1051.58	-0.335536	32.8992	0	C1203	33.33	B1503	0.0018
High	KSKDFVQVm	34	1	1	P78527	M9(Oxidation)	0	3.59498e+06	0	0.001842	3.38613	2	1097.57	-0.491099	37.4494	0	C1203	70.37	C1203	0.0946
High	GKSPLFGQYF	4	1	1	Q5VT66		0	1.7282e+06	0	0.0004501	3.38492	2	1143.58	-0.374227	79.0708	0	C1203	37.14	B1503	0.6991
High	DTAEIFHSA	20	1	1	Q92538		0	3.18144e+07	0	0.002286	3.3842	2	990.452	-0.981885	54.3248	0	C1203	37.04	A6802	0.0068
High	FKFGDQGGF	15	1	1	P49790		0	7.74395e+06	0	0.000384	3.3822	2	1002.47	-1.22484	66.4931	0	C1203	40.74	B1503	0.2126
High	HQQPPSQQY	37	1	1	Q15532		0	5.86647e+06	0	0.000124	3.38189	2	1112.51	-0.175235	29.4681	0	C1203	44.44	B1503	0.0037
High	EVFDKTYQF	30	1	1	Q96EU6		0	4.24045e+07	0	0.0003961	3.37796	2	1176.56	-0.436083	66.1043	0	C1203	37.04	A6802	0.1371
High	TTFDKEFLL	19	1	1	O60306		0	1.44616e+07	0	0.001518	3.3765	2	1113.58	-0.668583	80.0895	0	C1203	74.07	A6802	0.0214
High	AQLHPLSGY	3	1	1	Q7L7V1		0	1.50653e+06	0	0.003105	3.37089	2	985.51	-0.559286	53.6698	0	C1203	40.74	B1503	0.0144
High	EVAGILEPVGL	21	1	1	O95229		0	8.57971e+06	0	6.886e-05	3.36899	2	1096.62	-0.552717	94.0835	0		0	A6802	0.3333
High	QKLIFTVGY	12	1	1	Q8TDB6		0	2.65552e+06	0	0.0002157	3.36884	2	1068.61	-0.255653	74.8771	0	C1203	40.74	B1503	0.606
High	GKYFEPEAY	10	1	1	Q96NE9		0	5.01417e+06	0	0.0002842	3.36868	2	1103.5	-0.211427	56.9901	0	C1203	44.44	B1503	0.0289
High	AASALIRTL	12	1	1	Q13535		0	3.90829e+06	0	0.001563	3.3617	2	915.562	-0.26543	61.9196	0	C1203	92.59	C1203	0.0771
High	FSmYKPITY	6	1	1	Q68CL5	M3(Oxidation)	0	4.26296e+06	0	0.001311	3.35993	2	1165.56	-0.711024	59.3841	0	C1203	81.48	C1203	0.0087
High	SKEDDVRQY	28	1	1	P62753		0	2.32659e+06	0	0.0001525	3.354	2	1139.53	-0.0165484	28.0125	0	C1203	48.15	B1503	0.5897
High	TKFPAEQYY	4	1	1	Q15631		0	2.16958e+06	0	3.927e-05	3.35184	2	1146.55	-0.0566154	58.4979	0	C1203	48.15	B1503	0.0348
High	KQPDNSPEY	33	1	1	Q9NX07		0	4.23362e+06	0	0.0003689	3.34986	2	1077.48	-0.654221	31.047	0	C1203	44.44	B1503	0.0567
High	FASFILRTL	5	1	1	O95838		0	2.82831e+06	0	0.0007289	3.34693	2	1067.62	-1.06449	87.6286	0	C1203	88.89	C1203	0.0941
High	KLFLTGESY	7	1	1	P10619		0	2.20664e+06	0	0.0003796	3.34512	2	1057.56	-1.18	65.3495	0	C1203	40.74	B1503	0.0361
High	LQHPNIVGY	15	1	1	Q9BQI3		0	7.1633e+06	0	0.002969	3.34331	2	1040.55	-0.905385	56.8863	0	C1203	51.85	B1503	0.0036
High	DVIDFTGHAL	14	2	2	P31150;P50395		0	4.18051e+06	0	0.0003	3.34218	2	1087.54	-0.88286	77.8346	0	C1203	40	A6802	0.1132
High	GKYGFSDPLTF	10	2	2	Q92569;P27986		0	2.49602e+06	0	0.0007338	3.32937	2	1231.6	-0.494332	80.5351	0		0	B1503	0.7111
High	SAYGSVKAY	65	2	2	P07355;A6NMY6		0	1.3319e+08	0	0.0003503	3.32927	2	945.467	-0.326341	42.6948	0	C1203	88.89	C1203	0.0083
High	SVSSVVHYL	13	1	1	Q9NRL2		0	5.83124e+06	0	0.002667	3.3272	2	990.525	0.00803503	65.8664	0	C1203	48.15	A6802	0.0169
High	SGFSGVIRL	19	1	1	P11309		0	6.24759e+06	0	0.0002722	3.32536	2	935.531	-0.206319	73.295	0	C1203	51.85	C1203	0.15
High	GHYLGEFSITY	28	1	1	P62841		0	1.83385e+07	0	0.0001589	3.32379	2	1286.6	-0.609033	78.7762	0		0	B1503	1.6918
High	YTAEIKQNL	4	1	1	O95926		0	1.59358e+06	0	0.004288	3.31644	2	1079.57	-2.38712	49.6129	0	C1203	77.78	A6802	0.0185
High	GKLSEGVTISY	5	1	1	P05556		0	1.54802e+06	0	0.0001149	3.31048	2	1153.61	-0.0523747	60.6309	0		0	B1503	1.2198
High	YVADLVHSA	9	1	1	Q96S97		0	2.82542e+06	0	0.0007357	3.31024	2	974.493	-1.14081	53.2439	0	C1203	14.81	A6802	0.0116
High	AAQEAVKLY	6	1	1	O60506		0	2.52846e+06	0	0.002506	3.30909	2	992.54	-0.83674	51.0809	0	C1203	88.89	B1503	0.4966
High	GKSSGPTSLF	9	1	1	Q00839		0	2.75709e+06	0	0.003537	3.30778	2	980.504	-0.968402	57.1803	0	C1203	34.29	B1503	0.5851
High	AQFPNGPQF	16	1	1	Q99595		0	1.99827e+07	0	0.001839	3.3052	2	1005.48	-0.275532	71.1514	0	C1203	44.44	B1503	0.0011
High	KQFPTAFEF	5	1	1	Q13496		0	2.20792e+06	0	0.001395	3.30411	2	1114.56	-0.886065	77.6796	0	C1203	44.44	B1503	0.0065
High	GKNPDEVSY	22	1	1	O95391		0	1.3382e+07	0	0.004044	3.30321	2	1008.46	-0.420552	36.9598	0	C1203	48.15	B1503	0.077
High	ETVTATATSQV	9	1	1	Q9H4A3		0	2.89967e+06	0	0.0002556	3.29999	2	1107.55	-0.283027	48.9259	0		0	A6802	0.5902
High	YKILGGSVL	22	1	1	Q15843		0	1.6314e+07	0	0.002321	3.29852	2	949.571	-0.35132	71.4844	0	C1203	44.44	B1503	0.1272
High	GKFNVLLTTY	11	2	2	P51531;P51532		0	3.1853e+06	0	0.001156	3.29818	2	1155.64	-0.0663103	76.1076	0	C1203	37.14	B1503	0.5712
High	SAYEIIRDY	13	1	1	O60287		0	3.65766e+06	0	0.002219	3.29644	2	1129.55	-0.779096	64.3346	0	C1203	88.89	C1203	0.0162
High	DTAEIIKTL	24	1	1	P82909		0	2.62107e+07	0	0.002672	3.29534	2	1003.57	-0.777783	70.6092	0	C1203	85.19	A6802	0.0243
High	YmIDPSGVSY	75	1	1	P25788	M2(Oxidation)	0	2.10702e+07	0	0.0002931	3.29337	2	1147.5	-0.345376	68.9974	0	C1203	48.57	B1503	0.0334
High	FSNDIPHVV	20	1	1	Q8NI36		0	1.67868e+07	0	0.000439	3.28671	2	1027.52	-1.26958	63.6139	0	C1203	81.48	A6802	0.0344
High	GKNLYTNEY	14	3	3	Q9HCP0;P78368;Q9Y6M4		0	2.53267e+06	0	0.001882	3.28407	2	1101.52	0.0312866	44.0677	0	C1203	40.74	B1503	0.0801
High	YQSPHSGSF	13	1	1	P32004		0	2.76803e+06	0	0.001806	3.28255	2	1009.44	-0.0969271	39.4276	0	C1203	44.44	B1503	0.0029
High	GQYNKEDPTSF	15	1	1	Q15437		0	4.34729e+06	0	0.0007634	3.28176	2	1285.57	-0.518094	47.2075	0		0	B1503	0.1347
High	YTKQPQNDYL	6	1	1	Q9H6R0		0	1.51464e+06	0	0.0006449	3.28109	2	1269.61	0.0947401	46.7272	0	C1203	54.29	A6802	1.3599
High	DTFFRPLNV	15	1	1	Q13444		0	1.76968e+07	0	0.002467	3.27851	2	1108.58	-0.845211	81.3177	0	C1203	77.78	A6802	0.0509
High	SAVDFIRTL	31	1	1	Q9UEE5		0	7.28138e+07	0	0.004665	3.2783	2	1021.57	-0.94196	80.095	0	C1203	88.89	C1203	0.0059
High	HVFDHPWETV	18	1	1	Q9Y3B1		0	6.47045e+06	0	0.000596	3.27824	2	1266.59	-0.854557	63.4325	0	C1203	37.14	A6802	0.0334
High	LQRLENTQY	11	1	1	Q96D70		0	1.86718e+06	0	0.002304	3.27746	2	1164.6	-0.659553	45.3523	0	C1203	37.04	B1503	0.0108
High	NKYLTAEAF	13	1	1	Q16658		0	7.11289e+06	0	0.002671	3.27406	2	1056.53	-1.6298	60.8979	0	C1203	33.33	B1503	0.1519
High	YTSDLHFQV	10	1	1	Q1KMD3		0	1.14101e+07	0	0.00122	3.27358	2	1109.53	-0.485735	67.3976	0	C1203	77.78	A6802	0.0061
High	RQQPPSTTTF	21	1	1	A3KN83		0	4.6062e+06	0	0.000146	3.27283	2	1162.58	-0.437796	42.9811	0	C1203	37.14	B1503	0.0083
High	NTVDFFNQI	91	2	2	Q9H8S9;Q7L9L4		0	3.17231e+08	0	0.004902	3.26739	2	1097.53	-0.842939	89.75	0	C1203	62.96	A6802	0.0064
High	AQHLTVSGF	11	1	1	Q96GX5		0	3.11293e+06	0	0.004063	3.26346	2	959.494	-0.749653	56.7101	0	C1203	37.04	B1503	0.0138
High	AKVANASYY	16	1	1	O15042		0	3.46076e+06	0	0.001146	3.26325	2	986.494	-0.188731	39.3784	0	C1203	40.74	B1503	0.0678
High	DVYDKVDYL	15	1	1	Q14254		0	1.53485e+07	0	0.002684	3.25951	2	1129.54	-0.88759	68.7535	0	C1203	48.15	A6802	0.0235
High	KQISVGFIGY	4	1	1	Q13823		0	2.10726e+06	0	0.0001522	3.2575	2	1111.61	0.00928576	72.5885	0	C1203	28.57	B1503	0.0616
High	GKYLELLGY	15	1	1	O94979		0	6.41257e+06	0	0.002334	3.25667	2	1055.58	-0.930133	79.0668	0	C1203	44.44	B1503	0.1584
High	RAFEYEIRF	39	1	1	O60566		0	1.13605e+07	0	0.0001355	3.25647	3	1230.63	-0.206703	69.6754	0	C1203	77.78	B1503	0.0486
High	RLYFSQQTY	23	1	1	P33897		0	1.75753e+07	0	0.0002642	3.25525	2	1205.6	0.6548	58.8772	0	C1203	44.44	B1503	0.0148
High	DVSKIFQVV	20	1	1	Q5TF58		0	1.799e+07	0	0.001787	3.25115	2	1034.59	-1.00288	82.9357	0	C1203	44.44	A6802	0.1308
High	LKSGGVNQY	9	1	1	Q15021		0	2.65338e+06	0	0.0004332	3.25047	2	965.505	-0.303426	33.3467	0	C1203	48.15	B1503	0.0559
High	GKLHPSSSL	17	1	1	A5PLN9		0	2.97531e+06	0	0.00277	3.24901	2	925.51	-0.342558	31.7135	0	C1203	37.04	B1503	0.7917
High	EVIWLTQHV	15	1	1	Q9UJW0		0	6.71914e+06	0	0.001152	3.24686	2	1124.61	-0.434552	76.5584	0	C1203	37.04	A6802	0.0285
High	STSDLYNFQV	19	1	1	P10914		0	1.74916e+07	0	0.000303	3.24527	2	1173.54	-0.925409	81.08	0	C1203	45.71	A6802	0.1604
High	YAFPKAVSVF	25	1	1	O15427		0	4.27925e+07	0	2.965e-05	3.24368	2	1128.61	-0.791723	80.6577	0	C1203	77.14	C1203	0.059
High	SKYEALQTF	10	2	2	O15525;O60675		0	4.81333e+06	0	0.002184	3.24206	2	1086.55	-0.0689452	58.5127	0	C1203	40.74	B1503	0.0033
High	KAITFVTQY	17	1	1	Q9H0S4		0	9.71826e+06	0	0.001474	3.24035	2	1070.59	-1.0645	63.0662	0	C1203	77.78	C1203	0.0505
High	SVADVVRFI	15	1	1	Q9UHJ3		0	2.43013e+06	0	0.002073	3.23957	2	1005.57	-0.373922	83.4855	0	C1203	44.44	A6802	0.0166
High	NVVDVFHAV	13	1	1	Q15262		0	1.61458e+07	0	0.001513	3.23838	2	999.526	-0.23008	73.583	0	C1203	40.74	A6802	0.0022
High	RLVQSPNSY	8	2	2	Q71UM5;P42677		0	2.37769e+06	0	0.002456	3.23589	2	1063.55	-0.768752	43.4487	0	C1203	40.74	B1503	0.0284
High	SNSDVIRQV	14	1	1	Q9Y5K5		0	1.59967e+07	0	0.004234	3.23151	2	1017.53	-1.01487	43.5478	0	C1203	51.85	A6802	1.2171
High	NAFSGVmmL	104	1	1	Q9NTX5	M7(Oxidation); M8(Oxidation)	0	8.45767e+06	0	0.002104	3.22969	2	1001.44	-0.395143	74.5433	0	C1203	85.19	C1203	0.0302
High	STYEGKPIFL	9	1	1	Q9NU02		0	3.03487e+06	0	0.004364	3.2272	2	1154.61	-0.688774	69.5071	0	C1203	60	A6802	0.1994
High	TKISTHVSF	10	1	1	Q8TEY7		0	5.64432e+06	0	0.001709	3.227	2	1019.55	-0.720091	47.6517	0	C1203	37.04	B1503	0.0192
High	HVVDFFNRV	47	1	1	Q96BX8		0	3.08685e+07	0	0.0007128	3.22545	2	1132.59	-0.180199	65.4956	0	C1203	40.74	A6802	0.0068
High	SQFGGGSQY	46	1	1	O15371		0	5.24737e+07	0	0.004053	3.22386	2	930.395	-0.614165	45.7493	0	C1203	44.44	B1503	0.0013
High	EIVDFAKQV	4	1	1	P55055		0	1.41378e+06	0	0.004678	3.22272	2	1048.57	-1.01045	66.1279	0	C1203	44.44	A6802	0.038
High	AAFLKAIGY	23	1	1	O75533		0	2.03559e+07	0	0.0002646	3.21999	2	953.545	-0.386684	71.5121	0	C1203	85.19	C1203	0.1556
High	AQIKFLNTY	2	1	1	Q8ND90		0	4.03041e+06	0	0.0002805	3.21859	2	1097.6	-0.626003	67.6587	0	C1203	44.44	B1503	0.0029
High	FAYGGWNYL	15	1	1	Q01650		0	8.96417e+06	0	0.0002526	3.21811	2	1090.5	-0.304754	93.5401	0	C1203	85.19	C1203	0.0035
High	YKASSGLLY	9	1	1	Q08945		0	3.3218e+06	0	0.0001112	3.21603	2	1001.53	-0.651689	55.8586	0	C1203	51.85	B1503	0.0233
High	RAYQQSEAY	49	1	1	Q9P0W2		0	1.69418e+07	0	5.94e-05	3.21518	2	1115.51	-0.754375	34.093	0	C1203	77.78	B1503	0.024
High	GKFQDNFEF	16	2	2	Q15691;Q9UPY8		0	1.0641e+07	0	0.003251	3.21475	2	1131.51	-0.480717	69.3585	0	C1203	37.04	B1503	0.0536
High	SKNVSGISF	11	1	1	P49792		0	2.93199e+06	0	0.003898	3.20771	2	938.494	-0.54487	54.5496	0	C1203	33.33	B1503	0.015
High	KGYPSEFSTY	11	1	1	P49674		0	2.31233e+06	0	0.0002286	3.2061	2	1178.54	-0.85132	56.0655	0	C1203	34.29	B1503	0.7928
High	DVATITKTV	6	1	1	P57740		0	1.72617e+06	0	0.004423	3.20351	2	947.54	-0.592622	53.3416	0	C1203	48.15	A6802	0.0298
High	KQTQIFTTY	13	2	2	P34931;P08107		0	4.78318e+06	0	0.001066	3.20042	2	1129.59	-0.349503	56.6369	0	C1203	40.74	B1503	0.0027
High	SQYGSQVGY	11	1	1	Q14147		0	4.17684e+06	0	0.003877	3.19594	2	988.438	1.23298	48.5564	0	C1203	48.15	B1503	0.0029
High	TAAFWTRLY	10	2	2	Q8IXX5;Q1AE95		0	3.5534e+06	0	0.001634	3.18451	2	1128.58	-1.32058	81.9815	0	C1203	81.48	C1203	0.4217
High	VKNPDGGSY	12	1	1	Q15646		0	1.16246e+06	0	0.0002062	3.1792	2	936.442	-0.114369	29.913	0	C1203	48.15	B1503	0.0469
High	HAAGVLLHV	14	1	1	Q6UX98		0	4.39471e+06	0	0.004224	3.17697	2	916.534	-2.05107	51.3031	0	C1203	85.19	A6802	0.0153
High	LAAYHPWVV	25	1	1	Q5TA50		0	2.57661e+07	0	0.002136	3.1765	2	1055.57	0.228485	72.3624	0	C1203	85.19	C1203	0.6113
High	VKTGTITTF	27	1	1	P13639		0	7.26902e+07	0	0.004294	3.17538	2	967.545	-0.468758	52.8195	0	C1203	44.44	B1503	0.0132
High	QKIDVQESF	19	1	1	O95602		0	8.11974e+06	0	0.0007148	3.17515	2	1093.55	-1.26954	54.9877	0	C1203	33.33	B1503	0.0609
High	YSYWTKNGV	6	1	1	Q9Y639		0	3.05745e+06	0	0.0005331	3.17497	2	1117.53	-0.331008	56.0539	0	C1203	74.07	A6802	0.1851
High	GKQQWQQLY	14	1	1	Q7L2H7		0	7.49923e+06	0	0.004229	3.17445	2	1178.6	-0.248599	58.4465	0	C1203	37.04	B1503	0.3408
High	EVFDKTYQFL	9	1	1	Q96EU6		0	4.01379e+06	0	0.0003614	3.17203	2	1289.64	-0.0856207	79.7498	0	C1203	48.57	A6802	0.0732
High	GKTFSQTSY	7	1	1	Q96IR2		0	1.19428e+06	0	0.001873	3.17076	2	1018.48	-0.624751	39.0623	0	C1203	37.04	B1503	0.2193
High	VKGVSLSSY	11	1	1	Q9Y3B1		0	3.9276e+06	0	0.003918	3.16986	2	939.513	-1.32839	51.9571	0	C1203	40.74	B1503	0.2068
High	WAYPRQVFI	15	1	1	Q9P2D0		0	5.8516e+06	0	0.001251	3.16424	2	1179.63	-0.476935	80.4247	0	C1203	81.48	C1203	0.0611
High	DTFYIFNHV	10	1	1	Q99805		0	9.70283e+06	0	0.002233	3.16258	2	1155.55	-0.350408	84.5317	0	C1203	70.37	A6802	0.0213
High	LLYESPERY	14	1	1	Q03518		0	8.78623e+06	0	8.048e-05	3.16214	2	1169.58	-0.273326	57.2376	0	C1203	48.15	B1503	0.1254
High	DSFYVHHDI	12	1	1	Q13610		0	4.65866e+06	0	0.003359	3.16147	2	1132.5	-1.21781	51.5912	0	C1203	62.96	A6802	0.629
High	SKFPTQISL	17	1	1	O15164		0	1.51649e+07	0	0.001516	3.16132	2	1020.57	-0.62353	68.9133	0	C1203	51.85	B1503	0.061
High	AAYGYGIRY	54	3	3	P11216;P06737;P11217		0	5.56468e+07	0	0.0005766	3.16116	2	1033.51	-0.582691	58.1005	0	C1203	88.89	C1203	0.0164
High	GKTSLITRF	10	2	2	P20340;Q9NRW1		0	6.33074e+06	0	0.002891	3.15891	2	1022.6	-1.07387	51.0627	0	C1203	37.04	B1503	0.1631
High	SKLQNNNVY	17	1	1	P63010		0	4.44509e+06	0	0.001594	3.1572	2	1079.55	-0.452365	36.0483	0	C1203	40.74	B1503	0.0398
High	HQITVLHVY	16	1	1	Q9NYP7		0	5.74146e+06	0	0.0009971	3.1541	2	1109.61	-0.939828	56.4382	0	C1203	40.74	B1503	0.0082
High	KKFVETPGQKY	3	1	1	P05455		0	756573	0	0.004671	3.14962	3	1324.73	0.211498	35.0391	0		0	B1503	0.655
High	NTATIFHEL	24	1	1	Q9UHD2		0	1.4115e+08	0	0.002189	3.14919	2	1045.53	-1.19021	67.951	0	C1203	74.07	A6802	0.0071
High	ETIIDTKGV	8	1	1	Q9GZS1		0	3.87833e+06	0	0.000288	3.14804	2	975.535	-0.999142	52.8562	0	C1203	70.37	A6802	0.0365
High	TKVGPNATY	7	1	1	Q9Y5V3		0	1.98577e+06	0	0.003596	3.14748	2	950.494	-0.527471	37.3377	0	C1203	44.44	B1503	0.0179
High	DVINVFHHL	8	1	1	Q9UK58		0	2.92495e+06	0	0.001525	3.14611	2	1093.58	-0.368049	72.0472	0	C1203	37.04	A6802	0.0237
High	AQEDAQRLY	4	1	1	P20073		0	1.26819e+06	0	0.0007302	3.14591	2	1093.53	-0.475803	41.7145	0	C1203	48.15	B1503	0.0418
High	FAGLVQEISF	12	1	1	P48643		0	2.06642e+06	0	0.004686	3.1443	2	1110.58	-0.426956	97.2008	0	C1203	65.71	C1203	8.2396
High	GKVKSGGTYF	9	1	1	P55017		0	1.70677e+06	0	0.003193	3.1404	2	1043.55	-0.362185	36.0063	0	C1203	31.43	B1503	0.3228
High	AQNPANMSKY	4	2	2	P50502;Q8NFI4		0	1.21369e+06	0	0.0006341	3.13943	2	1123.52	-0.365264	39.3646	0	C1203	34.29	B1503	0.0106
High	AKYPEIKSL	39	1	1	O15121		0	3.47186e+07	0	0.002294	3.13854	2	1048.6	-1.23661	50.3981	0	C1203	59.26	B1503	0.0541
High	YVSEILEKV	14	1	1	P42704		0	5.11862e+06	0	0.001454	3.13488	2	1079.6	-1.04273	68.5277	0	C1203	48.15	A6802	0.0089
High	YLADIFTKL	18	1	1	Q49AG3		0	5.7746e+06	0	0.0002316	3.13084	2	1083.61	-0.398183	89.5562	0	C1203	48.15	C1203	0.0344
High	YAFAHILTV	5	1	1	O75204		0	7.17776e+06	0	0.002029	3.13067	2	1034.57	-0.382171	81.2778	0	C1203	92.59	C1203	0.0029
High	DQAEIRSLV	20	2	2	P09913;O14879		0	1.65458e+07	0	0.003739	3.13016	2	1030.55	-1.91398	61.3068	0	C1203	44.44	A6802	0.5213
High	mPAFIFEHI	51	1	1	O00560	M1(Oxidation)	0	4.35229e+06	0	0.003126	3.12926	2	1120.55	-0.569815	82.0064	0	C1203	33.33	A6802	0.7009
High	EVFNYIHNI	21	1	1	Q8N3P4		0	1.65442e+07	0	0.0004786	3.12686	2	1148.57	-0.29914	73.0265	0	C1203	37.04	A6802	0.0055
High	VKNWVPTAY	10	1	1	O14957		0	3.44419e+06	0	0.00139	3.12214	2	1077.57	-0.783509	62.2697	0	C1203	44.44	B1503	0.0194
High	KAIDYIRFL	9	1	1	P36956		0	5.5946e+06	0	0.002312	3.11953	2	1138.66	-0.569808	77.2613	0	C1203	85.19	C1203	0.0125
High	TTISKVSQV	8	1	1	Q9UNX4		0	2.61389e+06	0	0.002164	3.11843	2	962.551	-0.293075	41.3973	0	C1203	74.07	A6802	0.0155
High	GKFQGLIEKF	1	1	1	P30307		0	1.4162e+06	0	0.0004616	3.11798	2	1166.66	-0.50032	66.1418	0	C1203	42.86	B1503	0.4515
High	GQFPFPTAL	12	1	1	Q765P7		0	1.65497e+06	0	0.000733	3.1172	2	977.509	0.0629889	95.3707	0	C1203	51.85	B1503	0.0106
High	GQFLVKSGY	13	1	1	Q9NZI8		0	6.85892e+06	0	0.0006226	3.11587	2	998.53	-1.06529	54.9391	0	C1203	40.74	B1503	0.0481
High	SKINPNTAY	7	2	2	Q6IN85;Q5MIZ7		0	1.90691e+06	0	0.003377	3.11245	2	1007.52	-0.291685	38.1942	0	C1203	37.04	B1503	0.0068
High	AKQDVVLNY	13	1	1	Q15029		0	5.48017e+06	0	0.00305	3.11215	2	1049.56	-0.884363	52.909	0	C1203	51.85	B1503	0.0235
High	IQWENNGQVF	8	1	1	P28300		0	2.61103e+06	0	0.0009816	3.11072	2	1234.58	-0.618115	78.8912	0	C1203	40	B1503	0.0819
High	GKIQFGYVY	20	1	1	Q969M3		0	2.38784e+07	0	0.002533	3.10501	2	1074.56	-1.31114	68.0515	0	C1203	40.74	B1503	0.035
High	STFFQETNI	12	1	1	Q8IYN6		0	3.89871e+06	0	0.004486	3.10329	2	1086.51	-0.403196	77.998	0	C1203	62.96	A6802	0.1368
High	MASALVHIL	16	1	1	Q5VWQ8		0	5.00742e+06	0	0.004475	3.10233	2	954.544	-0.165931	76.4714	0	C1203	81.48	C1203	0.1674
High	DVSNPQTVGV	19	1	1	O60493		0	2.15271e+07	0	0.001471	3.10011	2	1015.5	-1.23316	54.442	0	C1203	28.57	A6802	0.1238
High	GKADGQQSSF	11	1	1	Q12772		0	650404	0	0.003791	3.09986	2	1024.47	-0.40954	27.831	0	C1203	42.86	B1503	0.4021
High	FKFVEQQSY	1	1	1	Q99590		0	1.93776e+06	0	0.000889	3.09771	2	1175.57	-0.426911	59.8969	0	C1203	44.44	B1503	0.0346
High	RQFEFSVDSF	8	3	3	Q96IP4;Q5VWP2;Q8NEK8		0	3.90603e+06	0	0.0002421	3.09455	2	1261.58	-0.149792	79.5827	0	C1203	40	B1503	0.027
High	AKLDVFQSY	1	1	1	Q13439		0	1.11753e+06	0	0.004876	3.09351	2	1070.55	-0.605586	66.4469	0	C1203	44.44	B1503	0.0081
High	KQTQTFTTY	5	3	3	P54652;P17066;P11142		0	3.37641e+06	0	0.0009033	3.09052	2	1117.55	-0.232363	43.9268	0	C1203	40.74	B1503	0.0027
High	FIYDSVKVY	4	1	1	Q00325		0	2.02203e+06	0	0.0005616	3.08812	2	1133.59	-0.0592957	71.8016	0	C1203	59.26	C1203	0.0117
High	AKSGVGTAL	14	1	1	P02786		0	2.8726e+06	0	0.002476	3.08606	2	803.462	0.0180492	36.0643	0	C1203	48.15	B1503	0.1989
High	IAFPSANEV	12	1	1	Q9NXH9		0	3.82515e+06	0	0.0014	3.08557	2	947.483	-0.319277	72.6518	0	C1203	88.89	C1203	0.0131
High	TVADVVLWSV	27	1	1	Q13155		0	1.636e+07	0	0.0002582	3.08329	2	1088.6	-0.458544	98.9483	0	C1203	31.43	A6802	0.0313
High	AQAASQHVF	12	1	1	Q9NQT4		0	3.29123e+06	0	0.001045	3.08293	2	958.473	-0.735575	39.5301	0	C1203	40.74	B1503	0.0041
High	GQAPPGKAL	39	1	1	A8MPP1		0	1.06431e+07	0	0.004723	3.08166	2	838.478	-0.126846	33.0955	0	C1203	51.85	B1503	0.0584
High	WTADISHLL	8	1	1	Q58EX7		0	1.44133e+06	0	0.00406	3.08129	2	1055.55	-0.473714	85.1834	0	C1203	74.07	A6802	0.0057
High	AKAPPPVFY	7	1	1	Q16643		0	4.58984e+06	0	0.002368	3.08094	2	989.545	-0.0642164	58.3288	0	C1203	59.26	B1503	0.0077
High	SKYPASSSVF	4	1	1	P09629		0	2.10832e+06	0	0.001837	3.07987	2	1072.53	-1.86758	52.4605	0	C1203	40	B1503	0.0308
High	SSSGIVYKV	19	1	1	Q9P2E3		0	7.86051e+06	0	0.002538	3.0784	2	939.513	-2.043	50.0015	0	C1203	77.78	A6802	0.0342
High	TVFDEAIRA	12	3	3	P63000;P15153;P60763		0	5.62177e+06	0	0.0008707	3.07674	2	1021.53	-0.99876	63.1527	0	C1203	11.11	A6802	0.0769
High	WQKGIGEFF	12	1	1	Q15004		0	5.78044e+06	0	0.0001367	3.07356	2	1111.56	-0.755056	78.1388	0	C1203	33.33	B1503	0.1056
High	KASGTLREY	59	1	1	Q02543		0	2.51338e+07	0	0.0009606	3.07163	2	1024.54	-0.534605	28.8477	0	C1203	88.89	C1203	0.2953
High	FSWEGAFQHV	12	1	1	P26641		0	2.52961e+06	0	0.002269	3.06731	2	1207.55	0.0139826	81.7487	0	C1203	60	A6802	0.8301
High	SSYLFIVKY	12	1	1	Q96QD8		0	5.2572e+06	0	0.0005437	3.06681	2	1119.61	-0.803635	80.9531	0	C1203	77.78	C1203	0.3078
High	AQGPTPRYF	79	1	1	O60427		0	3.9492e+08	0	0.001198	3.06584	2	1036.52	-1.45916	52.0445	0	C1203	48.15	B1503	0.0108
High	AKVKFEERY	25	1	1	P61353		0	3.32466e+06	0	0.001439	3.06291	2	1169.63	0.0119311	36.1982	0	C1203	40.74	B1503	0.2739
High	AMASIINRL	9	1	1	Q96N67		0	1.98983e+06	0	0.004052	3.06281	2	988.561	-0.218288	70.0187	0	C1203	51.85	C1203	0.6876
High	YKFDFPVSY	7	1	1	Q9NXE4		0	1.86076e+06	0	0.002554	3.06184	2	1165.56	-0.433697	81.8108	0	C1203	55.56	B1503	0.0018
High	ETFKDFPQm	35	2	2	P15170;Q8IYD1	M9(Oxidation)	0	5.48791e+06	0	0.001299	3.06079	2	1158.51	-0.0422063	58.5425	0	C1203	62.96	A6802	0.2512
High	DASPVTNNTI	19	1	1	O15164		0	9.38565e+06	0	0.001172	3.06062	2	1031.5	-0.480632	53.5213	0	C1203	45.71	A6802	1.0622
High	KQIFETIYY	17	1	1	P23921		0	1.20057e+07	0	0.001106	3.05976	2	1204.62	-0.765661	74.0352	0	C1203	40.74	B1503	0.012
High	VKVDELSLY	2	1	1	Q9BUR5		0	2.70537e+06	0	0.002868	3.05549	2	1065.58	-0.91843	69.8324	0	C1203	44.44	B1503	0.085
High	YSFGHPSSV	16	1	1	P31327		0	1.59348e+07	0	0.0009718	3.05293	2	980.446	-1.04719	50.5906	0	C1203	81.48	C1203	0.0052
High	EVYPFGIVGm	37	1	1	O75534	M10(Oxidation)	0	3.06167e+06	0	0.0003074	3.05092	2	1127.54	-0.631169	88.2946	0	C1203	28.57	A6802	0.0891
High	NAYSRILQA	15	1	1	O15230		0	5.83856e+06	0	0.004046	3.04799	2	1035.56	-0.871728	56.7264	0	C1203	51.85	A6802	0.3968
High	FTSQVIRNL	5	1	1	Q14204		0	2.43703e+06	0	0.004365	3.04579	2	1077.6	-1.25643	62.8235	0	C1203	81.48	C1203	0.1727
High	RKLEAAEDIAY	18	1	1	P35232		0	1.59559e+07	0	0.00175	3.04509	2	1278.67	-0.787555	49.3565	0		0	B1503	0.652
High	TLADVLYHV	16	1	1	Q9UBL3		0	7.18015e+06	0	0.001408	3.04305	2	1030.56	-0.465076	79.9922	0	C1203	44.44	A6802	0.0213
High	YVTDVLYRV	18	1	1	Q96Q15		0	2.71011e+07	0	0.0007462	3.04246	2	1127.61	-0.231261	73.482	0	C1203	44.44	A6802	0.008
High	FKVSDEVGF	7	1	1	Q6VY07		0	2.50051e+06	0	0.003371	3.04188	2	1027.51	-0.0917628	68.3673	0	C1203	40.74	B1503	0.4935
High	FLKPDDIQY	6	1	1	O75533		0	3.09848e+06	0	0.002137	3.04127	2	1138.58	-0.118492	66.2213	0	C1203	51.85	B1503	0.1694
High	RQLPGSQRY	11	1	1	Q96BD0		0	1.66954e+06	0	0.002061	3.04006	2	1104.59	-0.361763	33.2071	0	C1203	44.44	B1503	0.0018
High	GQTTTYLTY	19	1	1	P11388		0	1.12184e+07	0	0.0005237	3.03998	2	1047.5	-0.938126	63.6846	0	C1203	44.44	B1503	0.0257
High	SAYDNVNKV	10	1	1	P28482		0	2.96182e+06	0	0.004637	3.03885	2	1009.49	-1.28024	40.0913	0	C1203	85.19	C1203	0.0091
High	RQEGVPRTF	43	1	1	Q00403		0	4.38942e+07	0	0.004213	3.0386	2	1089.58	-1.02451	40.5908	0	C1203	44.44	B1503	0.0078
High	EVFRIGNVEI	8	1	1	P15927		0	4.3887e+06	0	0.001947	3.03665	2	1175.64	-0.78467	85.3451	0	C1203	20	A6802	0.2481
High	AKFSLPVSL	15	1	1	Q12980		0	5.86884e+06	0	0.0009522	3.03654	2	961.571	-0.357335	81.6188	0	C1203	55.56	B1503	0.0876
High	KQmEQISQF	47	2	2	P37802;Q9UI15	M3(Oxidation)	0	6.14473e+06	0	0.001912	3.03391	2	1154.55	-0.540178	44.9269	0	C1203	37.04	B1503	0.0022
High	NVAEIVIHI	17	1	1	Q9BZD4		0	9.43462e+06	0	0.001478	3.03286	2	1007.59	-0.690939	79.8951	0	C1203	44.44	A6802	0.0034
High	TAAQVARVL	8	1	1	A5YKK6		0	2.78207e+06	0	0.001863	3.03104	2	928.556	-1.19352	51.271	0	C1203	85.19	C1203	0.1716
High	DSSEIHFKV	18	1	1	P63165		0	1.1561e+07	0	0.004646	3.0278	2	1061.53	-0.986521	54.9774	0	C1203	74.07	A6802	0.0528
High	RLYGPSSVSF	19	1	1	P50454		0	9.64483e+06	0	0.002402	3.02584	2	1112.57	-1.19556	64.9289	0	C1203	42.86	B1503	0.1323
High	EQYESFVKF	15	1	1	Q9H9L7		0	6.75164e+06	0	0.002304	3.02492	2	1176.56	-0.436083	72.6604	0	C1203	40.74	B1503	0.0121
High	TAQTLVRIL	4	1	1	Q12905		0	3.1853e+06	0	0.003968	3.02184	2	1014.63	-0.710494	70.4328	0	C1203	81.48	C1203	1.0533
High	GQNPFELAF	14	1	1	Q9HBH9		0	2.25754e+06	0	0.003206	3.01981	2	1022.5	1.45996	96.1112	0	C1203	40.74	B1503	0.006
High	LSFQEVREY	6	1	1	O00311		0	1.48788e+06	0	0.002599	3.01955	2	1170.58	-0.290813	64.519	0	C1203	81.48	C1203	0.2278
High	HKVETFSGVY	6	1	1	P62081		0	2.69768e+06	0	0.004688	3.01931	2	1166.58	-0.3562	47.7836	0	C1203	34.29	B1503	0.5763
High	STFIGEHYV	20	1	1	P08581		0	1.54466e+07	0	0.002116	3.01746	2	1052.5	-1.11511	61.5628	0	C1203	70.37	A6802	0.0172
High	TVAQIKATV	18	1	1	Q8IXM2		0	6.31344e+06	0	0.002359	3.01672	2	930.561	-0.617267	47.9582	0	C1203	44.44	A6802	0.0147
High	EVSPVSFHQV	31	1	1	Q8N543		0	7.74269e+07	0	0.000362	3.01583	2	1128.57	-1.22022	59.5355	0	C1203	25.71	A6802	0.0332
High	EAAAVFKTL	22	1	1	Q8IWZ6		0	2.01602e+07	0	0.001693	3.00815	2	949.535	-0.487214	63.0419	0	C1203	85.19	A6802	0.1297
High	AAATSVHVV	14	1	1	Q68EM7		0	3.19106e+06	0	0.004228	3.00669	2	854.473	-0.0131547	41.5391	0	C1203	88.89	C1203	0.3109
High	DTITPQQVFV	12	1	1	Q9NZW5		0	3.37164e+06	0	0.003281	3.0049	2	1147.6	-0.530515	82.5619	0	C1203	45.71	A6802	0.1713
High	VQFGANKSQY	7	1	1	Q7Z7E8		0	1.45684e+06	0	0.003897	3.00416	2	1141.56	-0.672315	44.5316	0	C1203	40	B1503	0.0217
High	FKNPIIEKY	1	1	1	P00973		0	772514	0	0.002378	3.00367	2	1151.65	-0.458439	55.6839	0	C1203	51.85	B1503	0.0386
High	SKKPESTSF	29	1	1	Q9BT25		0	4.0764e+06	0	0.003589	3.00145	2	1010.51	-0.457349	26.0732	0	C1203	37.04	B1503	0.0119
High	HTINGHNAEV	43	1	1	P22626		0	3.64548e+07	0	0.004724	2.99869	2	1091.52	-0.677013	28.4323	0	C1203	45.71	A6802	0.0866
High	EIYNGKLFDL	14	1	1	Q99661		0	6.54371e+06	0	0.003554	2.99806	2	1211.63	-0.241499	82.5479	0	C1203	37.14	A6802	1.3597
High	AKIVPKISY	14	1	1	Q7Z417		0	1.24319e+07	0	0.003675	2.99363	2	1018.63	-0.795733	51.0601	0	C1203	44.44	B1503	0.013
High	SQYPFPVTLY	17	1	1	Q5R372		0	1.6765e+06	0	0.0005102	2.99298	2	1214.61	0.0652296	96.008	0	C1203	34.29	B1503	0.0041
High	FAYPAIRYL	53	1	1	P51398		0	8.13289e+07	0	0.001126	2.9928	2	1113.61	-0.322423	82.1045	0	C1203	96.3	C1203	0.0012
High	KEYERAIIF	18	1	1	P27105		0	7.76765e+06	0	0.002484	2.99185	2	1168.64	0.0211333	58.4883	0	C1203	40.74	B1503	0.0077
High	DTADQVIASFKV	6	1	1	O43707		0	1.01793e+06	0	0.0001017	2.99133	2	1293.67	-0.428975	83.872	0		0	A6802	0.8168
High	SQFGTVTRF	20	1	1	Q9BYG3		0	1.70334e+08	0	0.002409	2.99131	2	1042.53	-0.114683	59.0256	0	C1203	40.74	B1503	0.0015
High	KTPDFILQV	14	1	1	Q9Y2V0		0	1.02287e+07	0	0.001662	2.98968	2	1060.6	-0.886758	78.37	0	C1203	77.78	A6802	0.1542
High	YQTAPKAGY	6	1	1	Q96KR1		0	1.13062e+06	0	0.004496	2.98858	2	998.494	-0.24759	37.3085	0	C1203	40.74	B1503	0.0139
High	LAIEHVRFF	7	1	1	Q8NEM2		0	2.24882e+06	0	0.003118	2.98339	2	1131.63	0.356967	74.4	0	C1203	77.78	C1203	0.0599
High	DVYSGTPTKV	17	1	1	Q14493		0	1.09368e+07	0	0.004319	2.9814	2	1066.54	-0.457625	47.3939	0	C1203	40	A6802	0.151
High	TTVDINTQV	22	1	1	Q14676		0	3.20967e+07	0	0.004744	2.98047	2	990.51	0.050686	59.2967	0	C1203	70.37	A6802	0.0027
High	QQFPAFNSY	19	1	1	Q8N5U6		0	6.48209e+06	0	0.003628	2.97795	2	1101.5	-0.410334	76.0174	0	C1203	48.15	B1503	0.0013
High	SVITQVFHV	20	1	1	Q00341		0	2.13473e+07	0	0.00433	2.97731	2	1029.57	-1.05717	80.3125	0	C1203	40.74	A6802	0.03
High	YAYDGKDYLA	24	17	17	P17693;P01892;P30447;P05534;P10316;P01889;P30460;Q04826;P30479;P30480;P30486;P18464;P30490;P30498;Q31610;P30499;P04222		0	1.5632e+07	0	0.001509	2.97622	2	1178.54	-0.126274	55.7001	0	C1203	45.71	A6802	0.4989
High	EAAFFEGHFL	12	1	1	Q5W0V3		0	7.16934e+06	0	0.0001534	2.9715	2	1167.55	-0.0588424	84.4477	0	C1203	60	A6802	0.7464
High	RTTDIVIRI	11	1	1	Q9C0C9		0	9.04833e+06	0	0.003599	2.9707	2	1086.66	-2.03108	60.9815	0	C1203	70.37	A6802	0.1854
High	FISEIIHQL	8	1	1	Q9C040		0	1.54333e+06	0	0.0006034	2.96453	2	1099.61	-0.212637	82.132	0	C1203	51.85	A6802	0.0141
High	ETIGTGGFAKV	26	1	1	Q14680		0	4.92868e+07	0	0.004864	2.96394	2	1079.57	-0.153444	58.0908	0		0	A6802	0.2563
High	FSFPGELLm	183	2	2	P43003;P48664	M9(Oxidation)	0	1.8257e+07	0	0.0005726	2.96107	2	1056.51	-0.557474	98.1637	0	C1203	77.78	C1203	0.0263
High	KQLPESESF	11	1	1	Q8NI35		0	1.83638e+06	0	0.00423	2.96011	2	1064.53	-0.32973	47.1993	0	C1203	37.04	B1503	0.0082
High	GKSSVIQVF	5	1	1	Q8WVC6		0	8.62936e+06	0	0.003465	2.9585	2	964.546	-0.569599	63.3588	0	C1203	44.44	B1503	0.0291
High	AKFVDGEWY	1	1	1	Q7KZF4		0	2.5726e+06	0	0.001841	2.95427	2	1114.52	-0.326751	65.9499	0	C1203	44.44	B1503	0.4142
High	FAFSGVLRA	22	1	1	Q92766		0	2.60136e+07	0	0.004607	2.95379	2	967.535	-1.10755	75.19	0	C1203	55.56	C1203	0.208
High	YKLLGGLAV	36	1	1	P23396		0	1.11296e+08	0	0.003014	2.95147	2	933.576	-0.51389	78.2191	0	C1203	44.44	B1503	0.9261
High	YAYFNFPEL	6	1	1	Q8IY21		0	529806	0	0.0003446	2.94871	2	1163.54	0.00668917	103.1	0	C1203	85.19	C1203	0.0076
High	IKPDGLLEF	16	1	1	Q15345		0	4.30286e+06	0	0.004721	2.9465	2	1031.58	-0.270852	79.18	0	C1203	40.74	B1503	0.2297
High	LSAPIHTQm	53	1	1	Q8NG31	M9(Oxidation)	0	5.00471e+06	0	0.002441	2.94563	2	1013.51	-0.376968	46.7151	0	C1203	70.37	C1203	0.0508
High	AAFAYTVKY	41	1	1	Q8N2K1		0	1.149e+08	0	0.004384	2.94292	2	1033.53	-0.950083	63.1595	0	C1203	85.19	C1203	0.0287
High	YLYGQTTTY	20	1	1	P11388		0	1.22773e+07	0	0.0007426	2.94223	2	1109.51	-0.789188	61.5766	0	C1203	51.85	B1503	0.0076
High	GQIPQILYY	15	1	1	O75592		0	2.86129e+06	0	0.0009858	2.94091	2	1094.59	-0.474414	88.749	0	C1203	51.85	B1503	0.0067
High	KKPPGAQLGF	13	1	1	Q5EBL8		0	2.35644e+06	0	0.002338	2.93948	2	1042.6	-0.734705	46.2719	0	C1203	40	B1503	1.5459
High	FAISILQQI	25	2	2	P60842;Q14240		0	1.25539e+07	0	0.002753	2.93912	2	1032.61	-0.510682	102.056	0	C1203	74.07	C1203	0.0765
High	RSTKTGTAY	17	1	1	P17844		0	4.23087e+06	0	0.00236	2.93702	2	984.511	-0.309412	18.6215	0	C1203	66.67	B1503	0.2802
High	TTVEIFNKL	56	1	1	Q96QK1		0	2.7102e+08	0	0.004858	2.9355	2	1064.6	-0.918141	73.303	0	C1203	70.37	A6802	0.0152
High	RLWEQLVHF	28	1	1	Q5JS54		0	1.51715e+07	0	0.002982	2.93284	2	1227.66	0.319784	79.2687	0	C1203	37.04	B1503	0.158
High	ETYQFSGVYV	31	1	1	P61160		0	2.33539e+07	0	0.0007733	2.92813	2	1192.55	-0.452835	81.2252	0	C1203	45.71	A6802	0.0448
High	EVFPLAmNYL	76	3	3	P24385;P30279;P30281	M7(Oxidation)	0	4.37489e+06	0	0.000122	2.92752	2	1212.6	-0.507361	97.791	0	C1203	40	A6802	0.0835
High	VALNFIISY	26	2	2	P50616;Q14106		0	1.88031e+07	0	0.0009303	2.92552	2	1039.58	-0.321785	99.7416	0	C1203	85.19	C1203	0.0706
High	NQKPPSAEY	15	1	1	Q9UPN3		0	3.37195e+06	0	0.001129	2.92479	2	1033.49	-0.364651	33.7622	0	C1203	48.15	B1503	0.0102
High	TTFDHQNSENV	15	1	1	Q9Y2D8		0	2.8018e+06	0	0.0006728	2.92373	2	1291.56	0.28969	38.603	0		0	A6802	0.3537
High	TVSEVIQGL	28	1	1	Q8WWW0		0	2.02364e+07	0	0.002734	2.92373	2	945.525	-0.051032	76.1639	0	C1203	48.15	A6802	0.0154
High	SKLGPGEKY	26	2	2	P53805;Q9UKA8		0	6.01591e+06	0	0.002589	2.92321	2	978.525	-0.698427	31.3067	0	C1203	40.74	B1503	0.1059
High	FTYGAVVHY	7	1	1	Q96PZ7		0	2.26116e+06	0	0.002277	2.92182	2	1056.51	-0.559836	64.2019	0	C1203	85.19	C1203	0.0087
High	DVDVSLPKV	1	1	1	Q09666		0	1.71975e+06	0	0.002622	2.92145	2	971.54	-0.588275	70.3397	0	C1203	37.04	A6802	0.6227
High	EVISGKQEGV	12	2	2	Q9Y227;Q9NQZ7		0	4.51616e+06	0	0.0009452	2.91927	2	1045.55	-0.870382	38.4048	0	C1203	28.57	A6802	0.1576
High	SAIDRIFTL	24	1	1	Q86TU7		0	1.87737e+07	0	0.002657	2.91913	2	1035.58	-0.776539	84.8342	0	C1203	85.19	C1203	0.0032
High	YGYRQSVTY	6	1	1	P08174		0	3.17924e+06	0	0.003879	2.91728	2	1136.54	0.371202	48.3947	0	C1203	51.85	C1203	0.0393
High	DIANFQVLV	17	1	1	Q8IY34		0	5.47646e+06	0	0.001607	2.91668	2	1018.56	-0.370345	97.1706	0	C1203	44.44	A6802	0.0341
High	AKLPEIEEY	1	1	1	Q9BQ39		0	1.46918e+06	0	0.002555	2.91549	2	1091.56	-0.693021	61.954	0	C1203	55.56	B1503	0.0512
High	YKIDPSTL	15	1	1	O15294		0	7.49967e+06	0	0.002117	2.91542	2	936.502	-2.0114	59.5125	0	C1203	43.33	B1503	1.6411
High	YGYEHILTL	22	1	1	Q96AX1		0	1.1177e+07	0	0.002395	2.91265	2	1108.57	-0.80956	77.5208	0	C1203	59.26	C1203	0.0034
High	KAFDFPSSF	10	1	1	Q7L945		0	5.44494e+06	0	0.00186	2.90966	2	1045.5	-1.65598	77.0304	0	C1203	77.78	C1203	0.0036
High	mTSEIHNTV	107	1	1	O43264	M1(Oxidation)	0	2.15534e+07	0	0.001996	2.90809	2	1047.48	-0.805871	33.8016	0	C1203	77.78	A6802	0.0035
High	KLFIGGLSF	19	4	4	Q32P51;P09651;P22626;P51991		0	4.94836e+06	0	0.001567	2.90633	2	981.577	-0.312406	89.2386	0	C1203	37.04	B1503	0.0119
High	NVAEINRQV	10	1	1	O43933		0	2.22468e+06	0	0.003394	2.90333	2	1042.56	-0.369348	43.0533	0	C1203	48.15	A6802	0.0092
High	EVSPVSRQSI	15	1	1	Q9H6S3		0	3.76856e+06	0	0.003199	2.89931	2	1101.59	-0.461363	45.9995	0	C1203	20	A6802	0.3148
High	MKVLLAAAL	10	1	1	P23284		0	3.87195e+06	0	0.002642	2.89691	2	929.585	-0.77455	78.6899	0	C1203	37.04	B1503	1.6567
High	KGYPSEFATY	6	1	1	P48730		0	3.00636e+06	0	0.0009926	2.89597	2	1162.54	-0.516237	58.2687	0	C1203	34.29	B1503	0.7926
High	KLYQSIIGY	16	1	1	Q9NSV4		0	1.54734e+07	0	0.004688	2.89589	2	1084.6	-1.06457	67.7369	0	C1203	48.15	B1503	0.0529
High	ETFPANIQV	50	1	1	Q5VYK3		0	1.80947e+08	0	0.00159	2.89533	2	1018.52	-0.836951	77.6226	0	C1203	81.48	A6802	0.0025
High	RQFPVTVHF	20	1	1	Q8IY37		0	7.92219e+06	0	0.004416	2.89442	2	1130.61	-1.67266	63.8935	0	C1203	44.44	B1503	0.0015
High	AAFEKALEV	15	1	1	Q13325		0	8.76304e+06	0	0.003006	2.89414	2	977.529	-0.895923	62.1526	0	C1203	92.59	C1203	0.0125
High	NVIDNPWGV	18	1	1	Q5TGY1		0	4.02459e+06	0	0.002902	2.89179	2	1013.5	-0.609898	83.7189	0	C1203	44.44	A6802	0.0058
High	FQYPDTRYL	20	1	1	Q9NY61		0	1.13512e+07	0	0.0005708	2.88918	2	1202.58	0.0688052	69.4264	0	C1203	55.56	C1203	0.0253
High	RQYAKDIGF	22	1	1	P62273		0	6.94441e+06	0	0.003573	2.88903	2	1097.57	-0.743144	47.804	0	C1203	37.04	B1503	0.0026
High	KGSSAVRVY	27	1	1	P10914		0	5.66742e+06	0	0.0007258	2.88873	2	966.536	-0.264566	30.132	0	C1203	55.56	B1503	0.7561
High	FAAFFSHIL	3	1	1	Q86XA9		0	0	0	0.003628	2.88025	2	1052.55	-1.37006	92.7428	0	C1203	81.48	C1203	0.1805
High	EVAALIRSL	26	1	1	Q6P2Q9		0	1.72054e+07	0	0.001133	2.87976	2	971.588	-0.161452	74.1031	0	C1203	48.15	A6802	0.0378
High	GKFGGDFLVY	41	1	1	Q9BSV6		0	6.77212e+07	0	0.0008356	2.87941	2	1102.56	-0.452845	78.4726	0	C1203	54.29	B1503	0.1223
High	ETLFPSKIGV	20	2	2	Q9H8S9;Q7L9L4		0	1.27317e+07	0	0.002271	2.8741	2	1090.61	-0.256763	74.6496	0	C1203	45.71	A6802	0.0371
High	IKFFTGDVF	13	1	1	Q9UBE0		0	3.92594e+06	0	0.002306	2.87231	2	1073.57	-0.761763	85.9443	0	C1203	37.04	B1503	0.0667
High	SSYDKPITF	10	1	1	Q86X10		0	6.2336e+06	0	0.001601	2.87107	2	1057.52	-0.0133993	60.0272	0	C1203	77.78	C1203	0.0042
High	SAAGFPIRV	8	1	1	Q96H55		0	3.66002e+06	0	0.004775	2.86086	2	917.52	-0.408934	67.2275	0	C1203	88.89	A6802	0.0336
High	VKEGVSAAF	4	1	1	Q7L1Q6		0	1.806e+06	0	0.003599	2.85953	2	907.488	-0.0908565	48.2866	0	C1203	37.04	B1503	0.08
High	SIYGSYRNF	12	1	1	Q7L576		0	5.80265e+06	0	0.001652	2.85475	2	1106.53	-0.674964	60.1623	0	C1203	40.74	C1203	0.1909
High	YAFPKAVSV	36	1	1	O15427		0	1.06998e+08	0	0.002267	2.85389	2	981.54	-0.35112	66.7087	0	C1203	92.59	C1203	0.0015
High	RAIDFSPYL	21	1	1	P17676		0	1.32214e+07	0	0.001076	2.84986	2	1081.57	-0.824027	76.995	0	C1203	77.78	C1203	0.0061
High	EIYQKPFQTL	1	1	1	Q8NHH9		0	962102	0	0.002048	2.84902	2	1266.67	-0.387172	66.785	0	C1203	34.29	A6802	0.9922
High	GKFPSLLTH	30	1	1	P62906		0	124295578	0	0.002749	2.84679	2	999.561	-1.27117	56.8458	0	C1203	18.52	B1503	0.9746
High	TTFESSHYLL	10	1	1	Q16531		0	6.74209e+06	0	0.004171	2.84306	2	1197.58	-0.0939315	69.0918	0	C1203	54.29	A6802	0.0976
High	EVYGSLPAFL	24	1	1	Q01650		0	3.80911e+07	0	0.003381	2.84232	2	1095.57	-1.05958	98.4542	0	C1203	40	A6802	0.1394
High	YIKDFFEQM	7	1	1	Q5U649		0	3.4456e+06	0	0.002001	2.84088	2	1220.57	-0.258965	79.6973	0	C1203	37.04	C1203	0.1321
High	YKEDHPFEY	7	1	1	Q9H0R8		0	2.78022e+06	0	0.0004228	2.84077	2	1227.53	-0.826092	47.8751	0	C1203	51.85	B1503	0.1293
High	KKDDAITAY	5	1	1	Q9BY77		0	1.10566e+06	0	0.002358	2.8403	2	1024.53	-0.654216	34.2218	0	C1203	44.44	B1503	0.0249
High	AKIPGTGAL	9	1	1	O75298		0	3.33327e+06	0	0.003013	2.82862	2	827.499	0.00175831	51.7911	0	C1203	48.15	B1503	0.1149
High	NLYGSPREY	26	1	1	Q9NZM1		0	2.38946e+07	0	0.003693	2.82626	2	1098.52	-0.50038	48.5617	0	C1203	55.56	B1503	0.1427
High	STFGYVHGV	20	1	1	P38606		0	1.72094e+07	0	0.001423	2.82619	2	966.467	-0.544741	57.9351	0	C1203	77.78	A6802	0.0026
High	TTTEITHHGT	46	1	1	P15924		0	7.19126e+06	0	0.003743	2.82608	2	1097.52	-0.498629	22.7506	0	C1203	20	A6802	1.9445
High	IATSQNRIY	7	1	1	Q99623		0	1.28359e+06	0	0.004194	2.82332	2	1065.57	-0.790759	42.5069	0	C1203	81.48	B1503	1.1557
High	RAFPLPMSF	10	1	1	Q9UHJ6		0	2.13532e+06	0	0.0004053	2.82023	2	1065.55	-0.764375	86.346	0	C1203	81.48	C1203	0.0024
High	LQLERINVY	5	6	6	Q13885;Q9BVA1;P04350;P68371;Q9BUF5;Q3ZCM7		0	1.3158e+06	0	0.002631	2.8171	2	1147.65	-0.426374	70.2559	0	C1203	48.15	B1503	0.0087
High	SQSGLVHIW	7	1	1	Q9BYB4		0	3.06282e+06	0	0.001852	2.81492	2	1026.54	-0.784219	70.2326	0	C1203	11.11	B1503	0.3725
High	VAAPQVQQV	19	1	1	Q12772		0	1.00079e+07	0	0.00241	2.81002	2	939.525	-0.439665	52.596	0	C1203	92.59	C1203	0.1209
High	YSIDLSERV	6	1	1	Q6NTF9		0	3.05432e+06	0	0.002593	2.8062	2	1081.55	-0.935785	65.2497	0	C1203	74.07	A6802	0.0375
High	YVFDGKPPQL	15	1	1	P39748		0	4.76617e+06	0	0.0001375	2.80576	2	1163.61	0.0734261	71.7819	0	C1203	57.14	C1203	0.1729
High	ISAPLVKTL	11	1	1	P30305		0	1.39929e+07	0	0.001868	2.8017	2	941.603	-0.0290915	65.4523	0	C1203	88.89	C1203	0.0362
High	SQYPFPVTL	25	1	1	Q5R372		0	2.44003e+07	0	0.004447	2.79514	2	1051.55	-0.770063	93.3353	0	C1203	59.26	B1503	0.007
High	EIVQFFQGL	10	1	1	P31942		0	1.24608e+06	0	0.004019	2.7946	2	1080.57	-0.824099	101.058	0	C1203	37.04	A6802	0.2097
High	QVFPGLLERV	29	1	1	Q9UBB4		0	9.5888e+06	0	0.001088	2.79396	2	1157.67	-0.218744	81.7016	0	C1203	40	A6802	0.2207
High	TAMDQVFHV	1	1	1	Q93052		0	1.03865e+06	0	0.003399	2.79224	2	1047.49	-0.695253	71.0619	0	C1203	81.48	A6802	0.009
High	AQFETKKLY	31	1	1	O60613		0	1.91165e+07	0	0.002645	2.7858	2	1127.61	-0.997921	45.7954	0	C1203	51.85	B1503	0.004
High	YTFFTPNNI	48	1	1	P17844		0	1.39835e+08	0	0.002871	2.7805	2	1116.53	-0.986617	87.6914	0	C1203	70.37	A6802	0.0343
High	DTFLSIEHL	6	1	1	O60306		0	1.06684e+06	0	0.003136	2.77829	2	1074.55	-0.64703	84.3439	0	C1203	74.07	A6802	0.1217
High	TVFEHTFHV	15	1	1	P41250		0	1.14229e+07	0	0.003537	2.77561	2	1116.55	-0.229843	59.3033	0	C1203	44.44	A6802	0.0026
High	NQIPFIIQY	8	1	1	P20592		0	1.0166e+06	0	0.0005063	2.77468	2	1135.61	-0.19709	95.6316	0	C1203	51.85	B1503	0.008
High	AQPETRVSY	16	1	1	Q5SWA1		0	9.7732e+06	0	0.004547	2.77118	2	1050.52	-0.648962	39.6701	0	C1203	48.15	B1503	0.0099
High	SQFKGYFIF	24	1	1	Q9NY27		0	1.03374e+07	0	0.003606	2.7706	2	1136.58	-0.411177	86.3746	0	C1203	33.33	B1503	0.0094
High	AQYENPPHIY	8	2	2	Q12965;O00160		0	2.51308e+06	0	0.002946	2.76911	2	1231.57	-1.16095	54.911	0	C1203	40	B1503	0.0053
High	TKDGVREVF	7	1	1	P61586		0	3.8213e+06	0	0.001066	2.76836	2	1050.56	-0.912788	42.2716	0	C1203	37.04	B1503	0.5175
High	YKVDLESKL	4	1	1	Q96NC0		0	1.99755e+06	0	0.002383	2.76758	2	1094.61	-0.949568	56.4315	0	C1203	44.44	B1503	1.0015
High	VKVVPTVY	8	1	1	Q9Y282		0	4.42517e+06	0	0.002219	2.76606	2	904.55	-0.654601	57.0544	0	C1203	36.67	B1503	0.4625
High	AQVVQWVSF	17	1	1	P26641		0	2.5594e+06	0	0.002062	2.76447	2	1063.56	-0.435403	91.7792	0	C1203	37.04	B1503	0.0652
High	RQFEFSIDSF	2	1	1	Q96A09		0	1.06041e+06	0	0.001873	2.76347	2	1275.6	0.119345	84.8772	0	C1203	40	B1503	0.0261
High	YVTSILQSL	17	1	1	Q69YN4		0	7.95767e+06	0	0.003449	2.7572	2	1023.57	-0.7568	92.7705	0	C1203	44.44	C1203	0.0597
High	QAFPLIIKL	18	1	1	Q14CZ7		0	6.25825e+06	0	0.004902	2.75624	2	1042.67	-0.506805	92.5414	0	C1203	92.59	C1203	0.0287
High	RQFPTAFEF	20	1	1	Q13614		0	8.5201e+06	0	0.001914	2.75473	2	1142.56	-0.584512	78.5506	0	C1203	44.44	B1503	0.0057
High	KSFGSAQEF	11	1	1	P35606		0	3.0339e+06	0	0.004873	2.754	2	1000.47	-0.594065	47.5739	0	C1203	70.37	B1503	0.0601
High	EVSQVKETL	17	1	1	P30622		0	8.36359e+06	0	0.003958	2.75373	2	1032.56	-0.861248	44.2141	0	C1203	44.44	A6802	0.1209
High	YKIAFPYLY	2	1	1	Q6P2Q9		0	1.18684e+06	0	0.002473	2.7536	2	1177.63	-0.434425	88.9696	0	C1203	44.44	B1503	0.0814
High	SAIPHPLIm	27	1	1	P61201	M9(Oxidation)	0	6.94627e+06	0	0.003939	2.7528	2	994.538	-0.692405	63.6878	0	C1203	81.48	C1203	0.0063
High	FASHVSPEV	20	1	1	Q9NP61		0	44391286	0	0.004503	2.75241	2	972.478	-0.374597	48.2928	0	C1203	85.19	A6802	0.0842
High	SVYDGHGGEEV	13	1	1	O15355		0	4.50744e+06	0	0.004157	2.75161	2	1148.49	-0.30151	42.2047	0		0	A6802	0.6841
High	ETFNTPAmYV	212	7	7	Q9BYX7;P60709;P63261;Q6S8J3;A5A3E0;P0CG38;P0CG39	M8(Oxidation)	0	1.38035e+08	0	0.002749	2.74806	2	1188.52	-0.803806	73.5143	0	C1203	48.57	A6802	0.0227
High	EIIDFFLGA	14	1	1	P15880		0	1.90074e+07	0	0.003695	2.7465	2	1024.53	-0.665613	107.77	0	C1203	7.41	A6802	0.047
High	FAFPLHVDY	21	1	1	Q8TDY4		0	9.54387e+06	0	0.001035	2.74306	2	1108.55	-1.03718	86.3617	0	C1203	92.59	C1203	0.0261
High	YVTSVILHI	6	1	1	Q5VIR6		0	1.79971e+06	0	0.004891	2.74261	2	1044.61	-0.602527	79.938	0	C1203	44.44	A6802	0.1388
High	AKFGSKEEY	7	1	1	Q5VWQ8		0	1.2636e+06	0	0.003572	2.73961	2	1058.51	-0.494271	31.264	0	C1203	51.85	B1503	0.0236
High	EVNSGIYRV	21	1	1	Q0VDF9		0	2.91258e+07	0	0.004485	2.73552	2	1036.54	-0.881717	50.9184	0	C1203	44.44	A6802	0.0069
High	GKTTQLTQY	15	2	2	Q92620;Q14562		0	3.65816e+06	0	0.00146	2.7322	2	1039.54	-0.659912	38.8131	0	C1203	37.04	B1503	0.4062
High	EVAPSFGTLL	17	1	1	Q5SRE5		0	5.82872e+06	0	0.001327	2.73096	2	1033.56	-0.518112	92.5126	0	C1203	34.29	A6802	0.1054
High	SVFTFVAEV	20	1	1	Q7Z429		0	8.30038e+06	0	0.004396	2.72961	2	998.519	-0.709029	97.698	0	C1203	48.15	A6802	0.0314
High	FATPFLVVR	32	1	1	P15954		0	3.84129e+07	0	0.0005876	2.72918	2	1049.61	-0.79113	80.696	0	C1203	55.56	C1203	3.519
High	DAANVmVYV	6	1	1	Q9Y4C1	M6(Oxidation)	0	7.99854e+06	0	0.003174	2.72903	2	997.466	-0.0274231	69.0291	0	C1203	81.48	A6802	0.0105
High	RKLDPPGGQFY	11	1	1	O95400		0	9.02682e+06	0	0.0001663	2.72872	2	1277.66	-0.579053	52.8206	0		0	B1503	0.5857
High	DLIHEIYTV	5	1	1	P18124		0	2.07787e+06	0	0.00202	2.72859	2	1102.58	-0.445432	86.4537	0	C1203	44.44	A6802	0.2239
High	SVSPVVRVAV	40	1	1	P13639		0	2.34331e+08	0	0.001642	2.72444	2	1012.61	-0.938195	61.8802	0	C1203	25.71	A6802	0.1278
High	EVSFVIHNL	25	2	2	P49903;Q99611		0	5.98823e+07	0	0.002005	2.72273	2	1057.57	-1.53528	75.002	0	C1203	44.44	A6802	0.0164
High	RQLEDILSTY	18	1	1	P40222		0	1.22925e+07	0	0.002147	2.71941	2	1237.64	-0.55116	73.0772	0	C1203	28.57	B1503	0.0124
High	YAAGVHSVL	9	1	1	O43299		0	6.0823e+06	0	0.004322	2.71671	2	916.488	-0.561406	52.7626	0	C1203	88.89	C1203	0.008
High	EAADVWYNL	20	1	1	Q8TAM2		0	7.47468e+06	0	0.003283	2.71593	2	1080.5	0.216778	86.2011	0	C1203	81.48	A6802	0.0283
High	ETFAFQAEI	28	5	5	Q58FF8;Q58FF7;Q14568;P07900;P08238		0	4.55444e+07	0	0.00324	2.71394	2	1055.5	-0.586944	86.0224	0	C1203	66.67	A6802	0.0102
High	ETFDFVHNV	22	1	1	Q96E29		0	1.63318e+07	0	0.004353	2.71386	2	1107.51	-0.922987	71.4635	0	C1203	77.78	A6802	0.001
High	TTFESSHYL	16	1	1	Q16531		0	1.35472e+07	0	0.002049	2.71368	2	1084.49	-0.137332	56.697	0	C1203	74.07	A6802	0.0051
High	LAFPGEmLL	49	1	1	P43007	M7(Oxidation)	0	3.87056e+06	0	0.001627	2.712	2	1006.53	0.0331138	96.0638	0	C1203	85.19	C1203	0.0274
High	FAFDPSVNY	1	1	1	Q8IYM9		0	2.37431e+06	0	0.001036	2.71145	2	1059.48	-0.138141	82.6882	0	C1203	88.89	C1203	0.0043
High	EVFPDQFIHL	46	1	1	P07686		0	4.43702e+07	0	0.0003562	2.71112	2	1244.63	-0.410192	91.3676	0	C1203	40	A6802	0.0767
High	GQIPEIIFY	8	3	3	Q9H0C5;Q9Y2F9;Q96KE9		0	1.32793e+06	0	0.001408	2.70173	2	1079.58	-0.579501	97.9432	0	C1203	51.85	B1503	0.0145
High	YQVDSRTY	3	1	1	Q13131		0	799767	0	0.001809	2.6997	2	1031.48	-0.440082	41.4061	0	C1203	36.67	B1503	0.0362
High	FAIPLIEKL	16	1	1	Q9NR30		0	3.27101e+06	0	0.001385	2.69579	2	1043.65	-0.400104	93.7438	0	C1203	88.89	C1203	0.0276
High	FLWAGGRASY	4	1	1	Q00839		0	1.82706e+06	0	0.0005305	2.69359	2	1127.56	-0.776695	69.7496	0	C1203	42.86	B1503	0.6614
High	YATFIVTNY	15	1	1	Q9HBL8		0	1.03909e+07	0	0.003496	2.69136	2	1091.54	-0.76654	82.8086	0	C1203	81.48	C1203	0.1195
High	SSAPTARVF	14	1	1	O94906		0	9.67489e+06	0	0.001465	2.68925	2	935.495	0.0685946	48.296	0	C1203	77.78	C1203	0.1048
High	EVLDFITHL	29	1	1	Q13057		0	2.35822e+07	0	0.002338	2.68629	2	1086.58	-0.31484	94.077	0	C1203	44.44	A6802	0.0081
High	VQFSNHTGY	5	1	1	O00764		0	828402	0	0.001543	2.68597	2	1052.48	-0.522381	44.5436	0	C1203	48.15	B1503	0.0031
High	DTVTQFDNV	4	1	1	Q8TAQ2		0	1.3446e+06	0	0.002464	2.6776	2	1038.47	-1.1242	65.313	0	C1203	66.67	A6802	0.1356
High	YLLPDTKAY	12	1	1	P14625		0	3.02522e+06	0	0.001727	2.67629	2	1083.57	-1.05286	64.4278	0	C1203	51.85	B1503	0.0331
High	SAYARLIDY	4	1	1	P34897		0	3.28599e+06	0	0.003432	2.67324	2	1071.55	-0.377876	65.4545	0	C1203	81.48	C1203	0.0352
High	YQSPVRVY	6	2	2	Q92503;O43304		0	7.53407e+06	0	0.001406	2.67061	2	1011.53	-0.68041	53.6668	0	C1203	43.33	B1503	0.0188
High	AKAGGFVVGY	1	1	1	Q9HAV4		0	1.74507e+06	0	0.0005172	2.66995	2	968.52	0.152708	58.9605	0	C1203	40	B1503	0.1049
High	YAFPKSITVF	10	1	1	P53985		0	8.75947e+06	0	0.001771	2.66927	2	1172.63	-0.523852	84.1147	0	C1203	77.14	C1203	0.0324
High	EIFSRGPYSV	10	1	1	Q7LBC6		0	3.54962e+06	0	0.003538	2.66865	2	1154.58	-0.685744	64.6648	0	C1203	40	A6802	0.1114
High	IKDNVVIVY	17	1	1	Q9Y2T2		0	1.28034e+07	0	0.003438	2.66741	2	1062.62	-0.439684	64.3095	0	C1203	48.15	B1503	0.0687
High	YAQVmRTV	25	1	1	Q9NNW7	M5(Oxidation)	0	1.77221e+06	0	0.004475	2.66242	2	983.498	-0.315311	37.0264	0	C1203	80	C1203	3.4822
High	REYEAQQQY	7	1	1	Q9NUQ8		0	985207	0	0.0003587	2.65913	2	1214.54	-0.229502	35.2369	0	C1203	44.44	B1503	0.0052
High	ELINIIDGV	12	1	1	Q8NI22		0	3.58994e+06	0	0.003797	2.65869	2	985.556	-0.605276	94.8124	0	C1203	40.74	A6802	0.0378
High	IAFPTSISV	35	1	1	Q9UQ80		0	4.64574e+07	0	0.001118	2.65836	2	934.524	-0.250159	88.7767	0	C1203	88.89	C1203	0.0073
High	GQFGVGFYSAY	7	3	3	Q58FF6;P07900;P08238		0	1.35801e+06	0	0.003241	2.65209	2	1195.54	-0.0716448	85.781	0		0	B1503	0.3078
High	YAFVRPVIL	4	1	1	Q96S16		0	1.07532e+06	0	0.00212	2.6495	2	1077.65	-0.354569	82.3112	0	C1203	88.89	C1203	0.0064
High	DTSPVFQRL	18	1	1	Q9NU22		0	6.90606e+06	0	0.003579	2.64881	2	1062.56	-0.433534	65.0794	0	C1203	77.78	A6802	0.0678
High	mAAAWPLLL	32	1	1	P15151	M1(Oxidation)	0	8.87264e+06	0	0.003515	2.64869	2	1001.55	-0.649922	104.637	0	C1203	85.19	C1203	0.0433
High	QVFEGHTHYV	37	1	1	P35606		0	3.3198e+07	0	0.003151	2.64676	2	1216.57	-0.0499851	44.0445	0	C1203	37.14	A6802	0.0215
High	EAFHGKFYEA	32	1	1	Q13045		0	1.76687e+07	0	0.002256	2.64174	2	1198.55	-0.822567	47.7569	0	C1203	42.86	A6802	0.6977
High	KATAYILSV	15	1	1	P01106		0	7.57156e+06	0	0.004814	2.64152	2	965.566	-0.510195	65.6549	0	C1203	81.48	C1203	0.2256
High	SIAQIIVTV	26	1	1	Q9UNQ0		0	1.69953e+07	0	0.001678	2.6412	2	943.582	-0.300436	90.1381	0	C1203	51.85	A6802	0.0211
High	YAFPLAHSL	13	1	1	Q13496		0	1.59781e+07	0	0.0002964	2.64056	2	1018.54	0.739543	76.8577	0	C1203	88.89	C1203	0.0016
High	NVAEVTQSEI	2	2	2	Q9NVD7;Q9HBI1		0	2.50157e+06	0	0.001208	2.64017	2	1089.54	0.553423	59.0586	0	C1203	14.29	A6802	0.0973
High	EVFALIHEL	10	1	1	Q12766		0	2.93207e+06	0	0.002294	2.64008	2	1070.59	-1.08318	87.4523	0	C1203	48.15	A6802	0.0093
High	TTYDLTHTL	3	1	1	Q9NTJ5		0	5.78104e+06	0	0.00477	2.63977	2	1064.53	-0.41622	62.6774	0	C1203	77.78	A6802	0.0051
High	DVSIINITV	9	1	1	Q96BP3		0	931475	0	0.004259	2.63684	2	973.556	-0.289	95.7816	0	C1203	48.15	A6802	0.0262
High	AmNPTNTVF	51	1	1	P11142	M2(Oxidation)	0	3.63867e+07	0	0.002745	2.63537	2	1010.46	-0.581331	58.6843	0	C1203	44.44	B1503	0.0048
High	RKIGDTSVSY	13	1	1	P20700		0	6.49586e+06	0	0.002398	2.63394	2	1125.59	-1.31024	41.0396	0	C1203	37.14	B1503	0.0209
High	TTIEAIHGL	28	1	1	Q92905		0	4.93811e+07	0	0.004583	2.63183	2	954.525	-0.907817	62.1927	0	C1203	74.07	A6802	0.004
High	LQHPDVAAY	4	1	1	P35221		0	5.14197e+06	0	0.003362	2.62872	2	1013.5	-2.45705	49.7857	0	C1203	48.15	B1503	0.0027
High	HNAGISFSV	16	1	1	P40692		0	2.39139e+07	0	0.004442	2.62748	2	931.463	-0.390903	61.608	0	C1203	44.44	A6802	0.2808
High	GQWGGGSHY	127	1	1	B1AH88		0	8.03372e+07	0	0.002493	2.62682	2	948.396	-0.214909	40.2756	0	C1203	40.74	B1503	0.0081
High	YAKDDPLEF	3	1	1	P06756		0	4.50837e+06	0	0.004329	2.62533	2	1097.51	-0.287252	65.4406	0	C1203	85.19	C1203	0.028
High	RAFGIPIRV	42	1	1	P06493		0	7.70058e+07	0	0.004447	2.62064	2	1028.63	-1.91933	67.4111	0	C1203	88.89	C1203	0.0166
High	YVTTSTRTY	8	1	1	P08670		0	1.7228e+06	0	0.00108	2.62054	2	1091.54	-0.541337	38.5823	0	C1203	48.15	C1203	0.1046
High	TAFPFQVEV	20	1	1	A6NHR9		0	9.28847e+06	0	0.002373	2.61982	2	1037.53	-1.12861	94.7055	0	C1203	92.59	A6802	0.0162
High	RLLDTTITF	19	1	1	Q8N766		0	8.61063e+06	0	0.002085	2.61704	2	1079.61	-0.0339298	79.3076	0	C1203	40.74	B1503	0.0141
High	IGVEHVVVY	15	1	1	P49411		0	4.2718e+07	0	0.001503	2.61482	2	1014.56	-0.977418	63.142	0	C1203	51.85	C1203	0.1241
High	RLFGTTVTF	29	1	1	Q15904		0	5.06151e+07	0	0.002079	2.61002	2	1041.57	-0.585794	76.2023	0	C1203	44.44	B1503	0.0118
High	KAFGWPSSL	23	1	1	Q9HAH1		0	8.92433e+06	0	0.00312	2.60811	2	992.52	-0.219956	74.0887	0	C1203	85.19	C1203	0.0051
High	TTFEHAHNm	29	1	1	P13639	M9(Oxidation)	0	1.04022e+06	0	0.001986	2.60098	2	1103.46	-0.387375	25.5631	0	C1203	66.67	A6802	0.0346
High	TVIAKVNNV	13	1	1	P26639		0	3.62673e+06	0	0.003619	2.6007	2	957.572	-0.892139	45.8092	0	C1203	40.74	A6802	0.0132
High	RVFPYSVFY	92	1	1	O15118		0	5.66591e+07	0	0.001544	2.59839	2	1177.6	-0.750921	84.8969	0	C1203	51.85	C1203	0.0153
High	ETIESINQL	5	2	2	Q92925;Q6STE5		0	5.93971e+06	0	0.00337	2.59171	2	1046.54	-0.394596	70.4342	0	C1203	74.07	A6802	0.0076
High	EIAEAYLGYPV	7	1	1	P08107		0	4.35285e+06	0	0.00214	2.5904	2	1224.61	-0.339608	86.3546	0		0	A6802	1.2683
High	YLGEFSITY	12	1	1	P62841		0	3.83171e+06	0	0.001194	2.58126	2	1092.52	-0.552646	88.8043	0	C1203	51.85	B1503	0.131
High	TTIDVRTTF	12	1	1	Q8IY21		0	5.82998e+06	0	0.002819	2.57618	2	1053.56	-0.230386	62.2225	0	C1203	66.67	C1203	0.021
High	HSVYITSRV	14	1	1	Q8N961		0	4.25728e+06	0	0.004325	2.57578	2	1061.57	-0.634515	41.9791	0	C1203	66.67	A6802	0.052
High	FGVDRAILY	11	1	1	P06756		0	5.96423e+06	0	0.003971	2.57535	2	1053.57	0.57951	72.2876	0	C1203	48.15	C1203	0.0963
High	EAVSFQHFI	16	1	1	Q99598		0	6.13377e+06	0	0.001572	2.57462	2	1077.54	-0.327561	75.5954	0	C1203	70.37	A6802	0.0811
High	SAFPFPVTV	23	1	1	Q96K37		0	1.17886e+07	0	0.004125	2.57216	2	964.514	-0.36799	98.63	0	C1203	96.3	C1203	0.0042
High	TTILIPYHI	14	1	1	Q6IQ26		0	3.08761e+06	0	0.002218	2.571	2	1070.62	-0.155165	81.9333	0	C1203	62.96	A6802	0.0369
High	IASAIVNEL	11	1	1	Q9NR09		0	4.23636e+06	0	0.00303	2.56848	2	929.53	-0.340467	75.1931	0	C1203	85.19	C1203	0.052
High	MVVDIVQEL	35	1	1	O00764		0	6.11118e+07	0	0.002813	2.5651	2	1045.56	-0.709353	93.1524	0	C1203	48.15	A6802	0.0082
High	GQVTFLHVF	6	1	1	Q9BW60		0	1.7356e+06	0	0.004562	2.56222	2	1047.56	-0.047646	83.0841	0	C1203	33.33	B1503	0.0616
High	FAYPNRPDVL	22	1	1	Q03518		0	2.39352e+07	0	0.002874	2.56022	2	1191.62	-0.274632	67.4362	0	C1203	80	C1203	0.1481
High	DVAPPLIVHNI	2	1	1	P23458		0	1.2773e+06	0	0.004357	2.55785	2	1187.68	-0.470941	78.9851	0		0	A6802	0.5607
High	mTPEIIQKL	51	1	1	Q9UMS4	M1(Oxidation)	0	1.17772e+07	0	0.004787	2.55766	2	1088.6	-0.643341	65.0135	0	C1203	74.07	A6802	0.0397
High	VALLRVTPF	8	1	1	Q8N4H5		0	1.46432e+06	0	0.001383	2.55708	2	1015.63	-0.541738	82.2535	0	C1203	74.07	C1203	0.6391
High	VmAPRTLIL	84	19	19	P04222;P30504;Q9TNN7;Q29963;P30505;P30508;P30510;Q29960;P30443;P04439;P13746;P30512;P16188;P16189;P10314;P16190;P30455;P30459;Q07000	M2(Oxidation)	0	4.10414e+07	0	0.001647	2.55595	2	1029.61	-0.217571	68.0974	0	C1203	55.56	C1203	0.2605
High	NVFEGFYGV	4	1	1	Q9Y5Y0		0	2.87184e+06	0	0.004287	2.55541	2	1031.48	0.485657	91.5885	0	C1203	44.44	A6802	0.0032
High	GKTDPGTVF	7	1	1	Q9NYK5		0	1.34905e+06	0	0.004307	2.55118	2	921.467	-0.234924	47.2347	0	C1203	37.04	B1503	0.0438
High	FASFIVQYY	10	1	1	Q6P2Q9		0	1.4243e+06	0	0.00485	2.54639	2	1137.56	-0.295786	94.3419	0	C1203	85.19	C1203	0.1542
High	GQYPTQPTY	53	1	1	Q15038		0	1.94658e+08	0	0.00365	2.54419	2	1054.48	-1.46216	52.4021	0	C1203	51.85	B1503	0.0016
High	FTITPPTAQV	17	1	1	P52907		0	8.67866e+06	0	0.001849	2.54312	2	1074.58	-0.431954	77.8977	0	C1203	51.43	A6802	0.022
High	AAFPYGGVL	12	1	1	Q6PCD5		0	4.02871e+06	0	0.001509	2.53913	2	894.472	-0.192229	86.2763	0	C1203	92.59	C1203	0.0098
High	EAADIIQKL	14	1	1	O00471		0	1.14792e+07	0	0.004316	2.53609	2	1000.57	0.10009	65.5976	0	C1203	85.19	A6802	0.0324
High	SAMPTVRSF	20	1	1	Q03518		0	1.17257e+07	0	0.004328	2.53574	2	995.498	-0.081333	58.2735	0	C1203	81.48	C1203	0.0052
High	LSADIFQQV	21	1	1	O94916		0	2.16109e+07	0	0.004255	2.53319	2	1020.54	-0.56076	84.1514	0	C1203	74.07	A6802	0.0684
High	TVTSVLEYL	20	1	1	O14893		0	1.58078e+07	0	0.0033	2.53266	2	1024.56	-0.528726	96.9971	0	C1203	40.74	A6802	0.0717
High	ETIPLTAEKL	15	1	1	P24385		0	9.35882e+06	0	0.002328	2.53019	2	1114.63	-0.699912	67.0286	0	C1203	51.43	A6802	0.0816
High	AAADVLEFV	15	1	1	P53618		0	3.01366e+06	0	0.004262	2.52829	2	934.488	-0.192295	91.5889	0	C1203	85.19	A6802	0.0618
High	EVYEKPVQV	19	1	1	Q9Y508		0	1.86059e+07	0	0.001267	2.52729	2	1090.58	-0.347571	48.6649	0	C1203	51.85	A6802	0.0058
High	AKINEIRQm	4	1	1	Q15366	M9(Oxidation)	0	512279	0	0.004896	2.52276	2	1118.6	-0.0320837	30.3649	0	C1203	40.74	B1503	0.0761
High	YAYATVLTF	11	1	1	O15439		0	1.7649e+06	0	0.003376	2.51724	2	1048.53	-0.379389	92.4645	0	C1203	85.19	C1203	0.0025
High	EVFDEKIEV	9	1	1	Q02952		0	8.52245e+06	0	0.001174	2.51189	2	1107.56	-0.844651	67.7082	0	C1203	51.85	A6802	0.0047
High	SQANIAQVL	8	2	2	Q10567;P63010		0	1.69538e+06	0	0.002784	2.51053	2	943.521	-0.0888358	69.3462	0	C1203	44.44	B1503	0.0614
High	AQRQDIAFAY	15	1	1	P07355		0	6.65608e+06	0	0.00447	2.50085	2	1182.59	-0.295919	60.2247	0	C1203	31.43	B1503	0.023
High	EVFEKATFI	27	1	1	P19338		0	3.10758e+07	0	0.004112	2.48287	2	1083.57	-1.08055	70.8175	0	C1203	37.04	A6802	0.0158
High	ETFNDFVRL	13	1	1	O43913		0	7.37865e+06	0	0.000805	2.47247	2	1140.57	-0.145889	80.368	0	C1203	74.07	A6802	0.019
High	KSGPTSYL	14	1	1	Q5T686		0	3.14963e+06	0	0.004678	2.47032	2	852.446	-0.104147	46.8495	0	C1203	70	C1203	6.0005
High	HTFYNELRV	15	10	10	Q562R1;Q9BYX7;P60709;P68032;P63261;P68133;Q6S8J3;A5A3E0;P0CG38;P0CG39		0	7.49923e+06	0	0.003161	2.46995	2	1178.6	-0.145027	57.781	0	C1203	74.07	A6802	0.0419
High	YAFPKSITV	19	1	1	P53985		0	9.21858e+07	0	0.001892	2.46673	2	1025.57	-1.01597	70.9644	0	C1203	96.3	C1203	0.0014
High	KQQNPRLVY	10	1	1	O00764		0	3.43955e+06	0	0.004407	2.46574	2	1145.64	-0.191785	39.5354	0	C1203	44.44	B1503	0.0037
High	ESFEKAYQV	20	1	1	Q86V86		0	1.93228e+07	0	0.003842	2.46347	2	1100.53	-0.420777	53.5617	0	C1203	74.07	A6802	0.0087
High	GQYPVFNQY	1	1	1	Q96DN5		0	1.99785e+06	0	0.004004	2.46206	2	1115.52	-0.199766	71.8953	0	C1203	48.15	B1503	0.0022
High	RQINWTVLY	45	1	1	P83731		0	3.07665e+07	0	0.00278	2.45552	2	1192.65	0.0294856	78.4967	0	C1203	40.74	B1503	0.0094
High	DVAEFLYQV	38	1	1	Q9Y5M8		0	3.86648e+07	0	0.00319	2.45305	2	1083.53	-0.721335	97.0982	0	C1203	44.44	A6802	0.0045
High	ETIMNQEKL	8	1	1	P20290		0	3.25705e+06	0	0.003745	2.44654	2	1105.55	-1.00058	51.7147	0	C1203	66.67	A6802	0.3546
High	DTFSVQVLV	31	1	1	Q96L33		0	3.38462e+07	0	0.003841	2.44354	2	1007.54	-1.52659	93.4308	0	C1203	77.78	A6802	0.0147
High	AQVPFEQIL	44	1	1	Q99828		0	9.10246e+07	0	0.00429	2.43962	2	1044.57	-0.735639	91.1357	0	C1203	48.15	B1503	0.1391
High	GKWPSSQQY	6	1	1	Q8TD26		0	1.68403e+06	0	0.002005	2.43401	2	1080.51	0.000515092	45.097	0	C1203	44.44	B1503	0.0232
High	ETSGIGEARV	22	1	1	P61764		0	3.51242e+07	0	0.001936	2.42556	2	1018.52	-0.495388	42.0703	0	C1203	42.86	A6802	0.0618
High	NVTWVIVNL	9	1	1	O00505		0	1.13679e+06	0	0.004364	2.42171	2	1057.6	-0.970456	102.185	0	C1203	44.44	A6802	0.1161
High	FTAPTFTGSFL	9	1	1	Q9NXE4		0	1.66475e+06	0	0.001924	2.41697	2	1188.59	0.0624506	98.9831	0		0	A6802	1.2203
High	ETYFESARV	10	1	1	Q9H3L0		0	3.57172e+06	0	0.002862	2.41521	2	1101.52	-0.540969	56.8446	0	C1203	70.37	A6802	0.0088
High	NAFASVILF	17	1	1	P26641		0	2.03345e+07	0	0.004902	2.4017	2	981.54	-0.236942	103.32	0	C1203	77.78	C1203	0.1134
High	EVIDFSHGL	55	3	3	Q96GS6;Q5VST6;Q6PCB6		0	4.01719e+08	0	0.002124	2.38624	2	1016.5	-0.753973	73.4732	0	C1203	40.74	A6802	0.0026
High	SSFPTVVIY	32	1	1	Q9HCN4		0	8.52687e+07	0	0.004651	2.38409	2	1012.53	-0.463034	88.9955	0	C1203	85.19	C1203	0.0227
High	QTYGYEHIL	12	1	1	Q96AX1		0	5.67864e+06	0	0.003255	2.38025	2	1123.54	-1.36221	63.8049	0	C1203	74.07	A6802	0.1803
High	RQQQSQTAY	18	2	2	Q99613;B5ME19		0	1.85472e+06	0	0.004761	2.38	2	1109.53	-0.272769	22.1528	0	C1203	37.04	B1503	0.0031
High	DSFNYFINV	15	1	1	Q9NW08		0	4.40636e+06	0	0.004917	2.36388	2	1118.51	-0.567953	97.3285	0	C1203	74.07	A6802	0.0663
High	QKFLQGLVY	13	1	1	Q5J8M3		0	2.25431e+07	0	0.002363	2.34647	2	1095.62	-0.950474	75.143	0	C1203	48.15	B1503	0.0525
High	IALPSLRIL	13	1	1	P00403		0	6.22029e+06	0	0.003528	2.33791	2	995.661	-0.54152	90.4011	0	C1203	85.19	C1203	0.1144
High	EVAPAGSQV	5	1	1	O75147		0	1.23166e+06	0	0.00422	2.32825	2	857.436	0.0193959	41.2001	0	C1203	48.15	A6802	0.0081
High	ETADITHAL	15	1	1	Q15042		0	1.05884e+07	0	0.004764	2.32233	2	970.483	-1.05361	54.1271	0	C1203	74.07	A6802	0.0018
High	DVVNILVYV	11	1	1	Q15652		0	3.29606e+06	0	0.003881	2.32022	2	1033.59	-0.275161	106.807	0	C1203	40.74	A6802	0.011
High	FIPLPFAEA	5	1	1	Q9C0D2		0	794551	0	0.003899	2.31987	2	1004.54	-0.534573	101.072	0	C1203	7.41	A6802	0.2928
High	ALFRTIITY	9	2	2	P29992;P50148		0	2.5825e+06	0	0.004594	2.30792	2	1097.63	-0.526656	79.9102	0	C1203	55.56	B1503	0.047
High	RQYPEVIKY	4	1	1	Q9UIF8		0	3.97522e+06	0	0.002307	2.28525	2	1195.65	-0.605084	50.8422	0	C1203	55.56	B1503	0.0008
High	FTWEGLYNV	20	1	1	P51784		0	1.51157e+07	0	0.003412	2.28281	2	1128.54	-0.552318	95.2263	0	C1203	74.07	A6802	0.009
High	FQAPRNPTL	15	1	1	Q8IZW8		0	7.74244e+06	0	0.003483	2.27699	2	1043.56	-1.07316	54.8982	0	C1203	55.56	B1503	0.0561
High	FVGYFPATV	14	1	1	Q9HCE1		0	5.24949e+06	0	0.00228	2.27543	2	1000.51	-0.344755	87.9793	0	C1203	48.15	A6802	0.1668
High	EVIGKITAL	11	1	1	O43264		0	1.40628e+07	0	0.003008	2.2622	2	943.582	-0.311034	66.1673	0	C1203	44.44	A6802	0.0198
High	RVYPQAVYF	32	1	1	Q9Y4A5		0	5.50108e+07	0	0.002757	2.2543	2	1142.6	-1.31751	68.0254	0	C1203	44.44	C1203	0.0071
High	FSQDHLVIY	13	1	1	Q9BW91		0	6.59386e+06	0	0.004593	2.23355	2	1121.56	-0.927514	68.1008	0	C1203	77.78	C1203	0.0724
High	AAFEGTVFF	15	1	1	Q8NB49		0	2.19295e+06	0	0.003081	2.22651	2	988.478	0.0144931	94.5099	0	C1203	81.48	C1203	0.01
High	PQYQTWEEF	15	1	1	P49458		0	6.58551e+06	0	0.003322	2.13452	2	1227.53	0.0607561	79.5507	0	C1203	37.04	B1503	0.9741
High	ETIPSEIQVFV	7	1	1	Q15646		0	1.10883e+07	0	0.004871	2.12494	2	1261.67	0.021216	95.6695	0		0	A6802	0.339
High	ETIPGPDAKV	19	1	1	Q8TDP1		0	2.43307e+07	0	0.004172	2.09093	2	1026.55	-1.05351	50.8497	0	C1203	48.57	A6802	0.0331
High	EVFSSFAHA	7	1	1	O60502		0	1.69978e+07	0	0.002093	2.08783	2	994.462	-1.0163	61.0223	0	C1203	7.41	A6802	0.035
High	SAFPAVQYL	15	1	1	Q13227		0	3.99909e+06	0	0.004912	2.08325	2	995.519	-0.358197	88.3023	0	C1203	88.89	C1203	0.0028
High	ESAPIGIRV	10	1	1	O75054		0	4.68602e+06	0	0.002713	2.06928	2	941.541	-0.475897	60.4618	0	C1203	81.48	A6802	0.0083
High	LQKANQEQY	4	1	1	Q9UBU8		0	474031	0	0.003735	2.04115	2	1121.56	-0.281895	29.3472	0	C1203	37.04	B1503	0.0391
High	SKWNTRESY	3	1	1	Q99848		0	752785	0	0.003521	2.01912	2	1170.55	-0.279273	35.6437	0	C1203	37.04	B1503	0.0599
High	FLFDGSPTYV	9	1	1	P49327		0	2.47805e+06	0	0.004671	1.99668	2	1145.55	-0.0647461	94.1165	0	C1203	54.29	A6802	0.235
High	ETYPDPVRV	43	1	1	P49588		0	1.85395e+08	0	0.003494	1.91937	2	1075.54	-0.769916	57.2845	0	C1203	85.19	A6802	0.0048
High	YTTDFIYQL	21	1	1	Q01813		0	2.37876e+07	0	0.002132	1.71398	2	1163.56	-0.414533	92.817	0	C1203	77.78	A6802	0.009
High	EVSNIVKEAI	15	1	1	P63172		0	1.07571e+07	0.001	0.01598	3.38236	2	1101.61	-0.695242	62.5831	0	C1203	11.43	A6802	0.435
High	GKLKQFDAY	23	1	1	Q9Y282		0	5.99797e+06	0.001	0.0102	3.37487	2	1069.57	-0.833272	43.5873	0	C1203	37.04	B1503	0.2617
High	ITVSIIKEL	22	1	1	Q8TED0		0	1.25175e+07	0.001	0.007755	3.23755	2	1015.64	-0.483907	78.7095	0	C1203	81.48	C1203	0.2229
High	SKIAGILHY	1	1	1	P14735		0	1.25884e+06	0.001	0.005641	3.22299	2	1001.58	-0.552322	56.2107	0	C1203	44.44	B1503	0.0072
High	GKAEVAVTLY	9	1	1	Q9NSG2		0	3.02064e+06	0.001	0.01094	3.17248	2	1050.58	-0.558015	60.2145	0	C1203	28.57	B1503	0.256
High	DTFVHVTDL	11	1	1	P62263		0	6.84782e+06	0.001	0.005093	3.17235	2	1046.52	-0.150005	73.0209	0	C1203	74.07	A6802	0.4268
High	ETILISNNQV	5	1	1	Q9H9A6		0	2.128e+06	0.001	0.01044	3.15972	2	1130.6	-0.386849	68.0047	0	C1203	40	A6802	0.1332
High	AKAGITTTL	13	1	1	P33992		0	4.23005e+06	0.001	0.01275	3.12453	2	875.52	0.138991	47.1387	0	C1203	51.85	B1503	0.1159
High	GKVPQPAIL	11	1	1	P24928		0	4.90084e+06	0.001	0.007302	3.1152	2	922.572	-0.211715	58.7973	0	C1203	48.15	B1503	0.6706
High	LQRATGISF	2	1	1	Q15393		0	1.28667e+06	0.001	0.008206	3.10482	2	992.553	0.445023	57.4154	0	C1203	33.33	B1503	0.004
High	GKAPLNVQF	10	1	1	O75369		0	6.93145e+06	0.001	0.01322	3.10346	2	973.546	-0.286635	62.9783	0	C1203	44.44	B1503	0.0364
High	GKYAVIGTY	3	1	1	Q5JSH3		0	1.17654e+06	0.001	0.008948	3.10086	2	971.519	-0.796524	55.9439	0	C1203	48.15	B1503	0.0229
High	GKAFSQSSY	16	3	3	Q9UNY5;Q8NF99;Q9NQZ8		0	4.04625e+06	0.001	0.0123	3.09611	2	974.458	-0.25057	36.9839	0	C1203	40.74	B1503	0.1022
High	EAAGImENI	34	1	1	O60341	M6(Oxidation)	0	6.70501e+06	0.001	0.009422	3.08663	2	963.444	-1.26523	55.407	0	C1203	74.07	A6802	0.0187
High	DVAQIFNNI	10	1	1	Q9Y376		0	2.05811e+06	0.001	0.01272	3.07211	2	1033.53	-0.150718	92.6161	0	C1203	33.33	A6802	0.0325
High	DTSSLFDKL	14	1	1	Q16665		0	5.96879e+06	0.001	0.01091	3.07198	2	1025.51	-0.0693536	76.6198	0	C1203	74.07	A6802	0.3375
High	DLSNIINKL	19	1	1	Q9GZL7		0	4.43597e+06	0.001	0.01336	3.06825	2	1029.59	-0.722667	85.4324	0	C1203	44.44	A6802	0.4715
High	SQRSPSELF	3	1	1	Q9Y2W1		0	1.22904e+06	0.001	0.005332	3.06781	2	1050.52	-0.658481	55.0563	0	C1203	33.33	B1503	0.0059
High	LVASVRVPA	16	1	1	P42126		0	1.18898e+07	0.001	0.006803	3.06284	2	911.567	-0.828662	54.9912	0	C1203	11.11	A6802	0.6912
High	LKSPGSVVF	9	1	1	O75787		0	4.93887e+06	0.001	0.01372	3.0555	2	933.536	-4.43348	61.1651	0	C1203	48.15	B1503	0.01
High	GAYGQAVRY	20	1	1	Q9UID3		0	4.41179e+06	0.001	0.01477	3.05265	2	984.489	-0.42139	43.9	0	C1203	85.19	C1203	0.0963
High	TTTQITKTV	17	1	1	P11171		0	5.73085e+06	0.001	0.005027	3.04248	2	992.562	-0.408124	38.4117	0	C1203	74.07	A6802	0.0922
High	RKNPVTSTY	17	1	1	Q13131		0	8.75608e+06	0.001	0.007413	3.0232	2	1065.57	-0.6762	30.6334	0	C1203	48.15	B1503	0.0024
High	SVTQIYHAV	1	1	1	P04844		0	6.12373e+06	0.001	0.01618	3.0148	2	1017.53	-1.58687	54.4548	0	C1203	37.04	A6802	0.0354
High	DTAQIFRVNL	1	1	1	P13747		0	826114	0.001	0.005685	3.00346	2	1176.64	-0.162166	82.1831	0	C1203	45.71	A6802	0.4648
High	AASSIQRVL	14	2	2	Q5BKT4;Q5I7T1		0	4.98019e+06	0.001	0.01373	3.00077	2	944.552	-0.95396	51.3165	0	C1203	92.59	C1203	0.2688
High	GKVDGLAAL	9	1	1	Q3KQZ1		0	1.733e+06	0.001	0.01129	3.00047	2	843.494	0.16314	58.1161	0	C1203	40.74	B1503	0.4078
High	GQKPGGSDF	28	2	2	P56211;O43768		0	4.24005e+07	0.001	0.01426	2.99808	2	892.415	-0.786106	30.734	0	C1203	37.04	B1503	0.014
High	QAYSGIQQY	8	2	2	Q92879;O95319		0	3.50901e+06	0.001	0.005686	2.99398	2	1057.49	-1.03006	54.2791	0	C1203	85.19	C1203	0.0283
High	EVINTVAQV	20	1	1	O15121		0	2.02845e+07	0.001	0.007459	2.99271	2	972.535	-0.902231	63.3078	0	C1203	40.74	A6802	0.0059
High	AVANIVNSV	10	1	1	Q9BRQ8		0	5.01744e+06	0.001	0.016	2.99026	2	886.499	-0.259745	65.258	0	C1203	48.15	A6802	0.0195
High	VTTDIQVKV	7	1	1	O00267		0	3.30064e+07	0.001	0.01554	2.98956	2	1002.58	-0.462974	57.6036	0	C1203	77.78	A6802	0.0369
High	GKSTSIQSF	20	1	1	P13797		0	1.19753e+07	0.001	0.01408	2.98884	2	954.489	-0.254728	42.87	0	C1203	37.04	B1503	0.0291
High	KKANITFEY	13	1	1	O15372		0	8.78108e+06	0.001	0.007775	2.98383	2	1113.59	-0.659175	49.194	0	C1203	44.44	B1503	0.0366
High	VAADILNRL	1	1	1	O60673		0	1.47882e+06	0.001	0.01304	2.98107	2	984.583	-0.604168	71.7426	0	C1203	85.19	C1203	0.0292
High	ETFYIGKLI	15	1	1	Q7KZ85		0	4.06731e+06	0.001	0.006162	2.974	2	1083.61	-0.623487	84.4628	0	C1203	66.67	A6802	0.0935
High	GKVTGDTVY	2	1	1	Q6UX04		0	0	0.001	0.01268	2.96458	2	939.478	-0.415654	37.4475	0	C1203	40.74	B1503	0.0783
High	DVATITKTVV	2	1	1	P57740		0	2.1948e+06	0.001	0.01112	2.96417	2	1046.61	-0.886037	63.3719	0	C1203	31.43	A6802	0.3213
High	TASPVIKAV	21	1	1	Q8WU10		0	5.53807e+07	0.001	0.007165	2.96341	2	885.541	0.0819921	48.0655	0	C1203	92.59	A6802	0.084
High	GTYFNPHTV	14	1	1	O60294		0	9.40567e+06	0.001	0.009103	2.96241	2	1035.49	-1.66376	54.0243	0	C1203	77.78	A6802	0.1452
High	YAKLIAEL	20	1	1	Q8NI27		0	1.00453e+07	0.001	0.01223	2.94245	2	920.545	-0.42902	69.5266	0	C1203	93.33	C1203	1.1616
High	SKLPSSIEY	2	1	1	Q15386		0	6.55265e+06	0.001	0.01487	2.94211	2	1023.54	-0.157533	55.5778	0	C1203	51.85	B1503	0.0129
High	HKIEAGNEF	9	1	1	O43293		0	4.53534e+06	0.001	0.009157	2.93647	2	1044.51	-0.602957	36.4504	0	C1203	37.04	B1503	0.0147
High	GKKLFGEGY	5	1	1	Q92624		0	1.76263e+06	0.001	0.01019	2.93407	2	998.53	-0.891927	45.3185	0	C1203	37.04	B1503	0.5297
High	EAAEVILRV	70	1	1	P78371		0	6.89322e+08	0.001	0.0157	2.93318	2	999.582	-1.11981	67.215	0	C1203	88.89	A6802	0.0081
High	SMGPVRVAF	10	1	1	P29279		0	5878003	0.001	0.01373	2.93065	2	963.509	0.499446	67.4699	0	C1203	40.74	B1503	0.0604
High	FKVGDPEEY	5	1	1	Q8WYP3		0	0	0.001	0.006373	2.9302	2	1083.5	-0.493221	56.2858	0	C1203	51.85	B1503	0.3282
High	VAINHIVDF	16	1	1	P78346		0	8.32927e+06	0.001	0.006685	2.92644	2	1027.56	-1.63863	73.4923	0	C1203	77.78	C1203	0.1101
High	KQFQSPSTL	15	1	1	Q8NAP3		0	2.90216e+06	0.001	0.006588	2.91771	2	1035.55	-0.51855	46.8822	0	C1203	48.15	B1503	0.0128
High	EVFGLFQKL	9	1	1	P15924		0	8.61e+06	0.001	0.004955	2.91623	2	1080.61	-0.72318	87.6318	0	C1203	44.44	A6802	0.05
High	GQRKPATSY	105	1	1	P46779		0	4.14746e+07	0.001	0.008834	2.91437	2	1007.53	-0.4223	20.8949	0	C1203	37.04	B1503	0.0046
High	LSFPTTKTY	5	1	1	P69905		0	2024705	0.001	0.01224	2.90864	2	1057.55	-1.4014	61.3395	0	C1203	85.19	C1203	0.0275
High	KQWETQPGF	4	1	1	Q9UI26		0	1.59043e+06	0.001	0.00637	2.90729	2	1120.54	-0.933483	55.0461	0	C1203	33.33	B1503	0.0227
High	KQGEGFSVY	5	1	1	Q09019		0	3.8442e+06	0.001	0.007245	2.89688	2	1014.49	-0.961625	51.8293	0	C1203	44.44	B1503	0.0037
High	SKAPAPVTY	3	1	1	Q9H0R1		0	1.06701e+06	0.001	0.005463	2.89281	2	933.504	-0.289829	42.1107	0	C1203	59.26	B1503	0.0034
High	RHWGGQADF	6	1	1	Q6PJG6		0	2.08828e+06	0.001	0.01492	2.89272	2	1073.49	-0.515249	43.8418	0	C1203	33.33	B1503	0.2508
High	GQFASDVQF	17	1	1	Q02833		0	6.71505e+06	0.001	0.006716	2.89188	2	998.458	-0.325708	72.1656	0	C1203	37.04	B1503	0.0109
High	STSDIITRI	20	2	2	P49585;Q9Y5K3		0	4.01653e+08	0.001	0.007666	2.88827	2	1005.56	-1.15185	61.8548	0	C1203	70.37	A6802	0.0093
High	KKSDPVVSY	51	1	1	P13639		0	3.20498e+07	0.001	0.00619	2.87412	2	1022.55	-0.81308	34.6536	0	C1203	51.85	B1503	0.0042
High	FTAAIISRV	18	1	1	Q9Y570		0	1.18389e+07	0.001	0.01043	2.87147	2	977.577	-0.773646	67.8959	0	C1203	77.78	A6802	0.0048
High	KKIPSTVEF	6	1	1	Q9H2G9		0	2.58432e+06	0.001	0.01355	2.86928	2	1048.6	-0.896906	48.2118	0	C1203	44.44	B1503	0.0044
High	STFEDVTQV	8	1	1	Q14247		0	3.3954e+06	0.001	0.01188	2.86537	2	1025.48	-0.651821	65.5882	0	C1203	77.78	A6802	0.0077
High	ETAGFQEGV	8	1	1	Q5TCZ1		0	2.27275e+06	0.001	0.01395	2.85994	2	937.426	-0.592641	53.7678	0	C1203	74.07	A6802	0.0046
High	VKAPSSQTF	9	1	1	Q86TC9		0	2.28461e+06	0.001	0.01537	2.85399	2	964.51	-0.113126	42.0844	0	C1203	48.15	B1503	0.0054
High	KAIATTVTY	14	1	1	O43808		0	1.07661e+07	0.001	0.005058	2.85197	2	967.545	-0.710753	47.3374	0	C1203	81.48	B1503	0.0276
High	SQGPTLQF	7	1	1	Q15022		0	3.12057e+06	0.001	0.007938	2.84446	2	877.441	-0.19438	69.933	0	C1203	33.33	B1503	0.3176
High	HTILIVEKV	7	1	1	Q8TD19		0	2.48062e+06	0.001	0.009522	2.84422	2	1051.65	-1.16334	57.1871	0	C1203	70.37	A6802	0.0187
High	GQNGGILVY	4	1	1	Q86XK2		0	2.44271e+06	0.001	0.01097	2.839	2	920.483	-0.212132	68.7553	0	C1203	51.85	B1503	0.0056
High	RQYPTPFQL	13	1	1	Q8ND82		0	4.42211e+06	0.001	0.01378	2.838	2	1149.6	-1.16904	72.5538	0	C1203	51.85	B1503	0.0118
High	AAAGLHSNV	12	1	1	Q9UJX3		0	2.1225e+06	0.001	0.00999	2.8354	2	839.437	-0.0393331	32.135	0	C1203	85.19	A6802	0.3613
High	TNSSVIVRV	9	1	1	Q8NI29		0	3.67877e+06	0.001	0.009183	2.82943	2	974.562	-1.23867	51.8225	0	C1203	51.85	A6802	0.6352
High	GKAWGILTF	20	1	1	P82930		0	4.34703e+06	0.001	0.01029	2.82498	2	992.555	-1.09399	87.1612	0	C1203	44.44	B1503	0.0271
High	SKFAGGLHF	13	1	1	Q09666		0	5.58618e+06	0.001	0.01044	2.82247	2	963.504	-0.796521	56.6193	0	C1203	37.04	B1503	0.003
High	ETFQNSVFV	19	1	1	O00767		0	2.38708e+07	0.001	0.006197	2.81806	2	1070.51	-0.944849	77.2405	0	C1203	74.07	A6802	0.0072
High	GQVKTGISm	4	1	1	Q8TCN5	M9(Oxidation)	0	485750	0.001	0.00852	2.81714	2	936.481	-0.614491	35.4297	0	C1203	33.33	B1503	0.0254
High	RQIGSRSY	51	1	1	P51114		0	1.68962e+07	0.001	0.01376	2.80707	2	966.511	-0.440039	26.319	0	C1203	30	B1503	0.0166
High	TVADKIHSV	5	1	1	O95147		0	2.92718e+06	0.001	0.01101	2.80649	2	969.536	-0.615861	38.4762	0	C1203	48.15	A6802	0.0033
High	HSVYIPNKV	11	1	1	Q8TB22		0	1.52065e+06	0.001	0.005418	2.80603	2	1056.58	-0.707904	45.944	0	C1203	70.37	A6802	0.094
High	ELFSGGNTGI	8	2	2	O00571;O15523		0	1.82681e+06	0.001	0.01244	2.79358	2	994.483	-0.669995	71.7369	0	C1203	25.71	A6802	0.6754
High	AKYPIKQSL	12	1	1	P21283		0	5.74667e+06	0.001	0.006885	2.79289	2	1047.62	-0.527936	42.0283	0	C1203	51.85	B1503	0.0819
High	ITGPLIRIL	14	1	1	Q92616		0	2.16093e+06	0.001	0.01452	2.79168	2	995.661	-0.602821	84.3228	0	C1203	81.48	C1203	0.7313
High	AKLKGIGEY	6	1	1	Q92620		0	2.29809e+06	0.001	0.008028	2.78848	2	978.562	-0.212755	41.6741	0	C1203	48.15	B1503	0.0283
High	QERPSVTSY	11	1	1	Q9UJX3		0	3.41747e+06	0.001	0.009139	2.78424	2	1066.52	-0.216049	40.5752	0	C1203	48.15	B1503	0.0243
High	NASPVISSV	10	1	1	Q96T58		0	4.01488e+06	0.001	0.01236	2.77105	2	873.467	-0.306262	57.9259	0	C1203	88.89	A6802	0.01
High	AAYYHPSYL	20	1	1	Q14687		0	1.34354e+07	0.001	0.01471	2.76692	2	1084.51	-1.24559	59.3201	0	C1203	85.19	C1203	0.0061
High	DIYSKFDVI	7	2	2	P54619;Q9UGJ0		0	2.39938e+06	0.001	0.009479	2.76657	2	1099.57	-0.0901901	81.3537	0	C1203	40.74	A6802	0.7913
High	AVAAVLTQV	6	1	1	Q99720		0	1.51877e+06	0.001	0.01423	2.76637	2	871.525	-0.0280692	71.5729	0	C1203	44.44	A6802	0.0366
High	STVSIQIKL	14	1	1	O60502		0	4.42147e+06	0.001	0.009787	2.76237	2	988.603	-0.447315	72.6453	0	C1203	74.07	A6802	0.0859
High	ELFTGFIKV	17	1	1	Q86TM6		0	6.06582e+06	0.001	0.01169	2.75584	2	1053.6	-0.244354	88.0949	0	C1203	44.44	A6802	0.114
High	YQSDPSGNY	6	1	1	P25789		0	4.04354e+06	0.001	0.01472	2.75474	2	1030.41	-0.65143	39.5356	0	C1203	48.15	B1503	0.0126
High	AKAPPTACY	3	1	1	P17676		0	1.39909e+06	0.001	0.01054	2.75152	2	921.45	-0.0929349	38.3615	0	C1203	51.85	B1503	0.027
High	EIANILQEL	15	1	1	Q49AM1		0	2.18677e+06	0.001	0.01333	2.74897	2	1042.58	-0.256079	98.1775	0	C1203	44.44	A6802	0.0291
High	KKLSSPSNY	10	1	1	Q13325		0	1.28555e+06	0.001	0.01234	2.74784	2	1023.55	-0.514859	28.6314	0	C1203	44.44	B1503	0.0581
High	FTFGSKVTY	1	1	1	Q4LDE5		0	866385	0.001	0.009624	2.74567	2	1049.53	-0.631412	65.0355	0	C1203	85.19	C1203	0.0093
High	SSFPRFYFV	10	1	1	Q14204		0	4.2983e+06	0.001	0.005629	2.74542	2	1149.57	-0.309686	87.5791	0	C1203	77.78	A6802	0.0816
High	RQLLYITAF	8	2	2	O95298;E9PQ53		0	1.34816e+06	0.001	0.005163	2.74379	2	1124.65	-0.111624	83.5517	0	C1203	33.33	B1503	0.0217
High	SAKTPGFSV	18	1	1	Q9NY61		0	1.84554e+07	0.001	0.008221	2.72898	2	893.472	-0.599607	50.6502	0	C1203	74.07	C1203	0.3976
High	SISDVIAQV	20	1	1	Q9HCJ1		0	3.20553e+07	0.001	0.0112	2.72516	2	931.509	-0.287053	79.2653	0	C1203	48.15	A6802	0.01
High	LQILGTNSF	7	1	1	Q9Y2G0		0	2.40836e+06	0.001	0.005267	2.71929	2	992.541	0.27015	77.453	0	C1203	29.63	B1503	0.0053
High	SVADTVARV	11	1	1	Q9NYY3		0	4.31086e+06	0.001	0.01537	2.71832	2	917.505	-0.00848309	48.8657	0	C1203	48.15	A6802	0.0055
High	SQARTLITF	8	1	1	Q8N1F7		0	3.87111e+06	0.001	0.005079	2.71696	2	1036.58	-0.776509	67.1383	0	C1203	40.74	B1503	0.0095
High	FAFEEAIGY	3	1	1	Q96G03		0	1.93797e+06	0.001	0.008595	2.71668	2	1046.48	-0.372444	88.0267	0	C1203	88.89	C1203	0.0291
High	EIAQVVEKV	15	1	1	Q9BYK8		0	9.06028e+06	0.001	0.01415	2.71658	2	1014.58	-0.948618	56.3635	0	C1203	44.44	A6802	0.0187
High	FASTILHLV	21	1	1	P61803		0	1.22098e+07	0.001	0.01591	2.69905	2	1000.58	-0.674129	81.9622	0	C1203	81.48	A6802	0.045
High	SAFPSNIFY	3	1	1	Q92900		0	2.71956e+06	0.001	0.01149	2.69439	2	1045.5	-0.469265	90.8473	0	C1203	88.89	C1203	0.0224
High	SQGSFPEHY	17	1	1	Q9HBH0		0	3.54112e+06	0.001	0.01074	2.69027	2	1051.45	-0.858072	45.9592	0	C1203	44.44	B1503	0.0672
High	GKVRTDITY	31	1	1	P62701		0	4.42453e+07	0.001	0.01598	2.68818	2	1052.57	-0.91579	38.9815	0	C1203	44.44	B1503	0.128
High	AKLPSETIF	5	1	1	P57678		0	3.48302e+06	0.001	0.01213	2.68702	2	1005.56	-0.121657	66.7583	0	C1203	40.74	B1503	0.0346
High	SKLYNNITF	4	1	1	Q9BT78		0	1.39368e+06	0.001	0.00829	2.68559	2	1099.58	-0.746762	65.5766	0	C1203	37.04	B1503	0.0578
High	DTFDKNYKA	18	1	1	Q9BZG1		0	9.02312e+06	0.001	0.01007	2.68543	2	1101.52	-0.651789	35.4934	0	C1203	37.04	A6802	0.0393
High	LQRATPEQY	8	1	1	P14324		0	1.94283e+06	0.001	0.01288	2.68448	2	1105.56	-0.362964	38.1728	0	C1203	40.74	B1503	0.0111
High	LKSVNELIY	17	1	1	P18124		0	1.64672e+07	0.001	0.006388	2.68339	2	1078.61	-0.467424	66.0259	0	C1203	44.44	B1503	0.4351
High	FSKDIFSVI	30	1	1	Q01650		0	4.53203e+07	0.001	0.006936	2.68277	2	1055.58	-1.06472	85.1103	0	C1203	70.37	C1203	0.11
High	IAIPFLIKL	7	1	1	Q8N2K0		0	1.62613e+06	0.001	0.01443	2.68196	2	1027.69	-0.373324	103.002	0	C1203	85.19	C1203	0.0381
High	SQLVAGVAF	10	1	1	Q99832		0	3.09648e+06	0.001	0.006479	2.68156	2	891.493	-0.450603	80.5594	0	C1203	33.33	B1503	0.0138
High	RSYPYAFSV	17	1	1	Q5H9F3		0	1.27369e+07	0.001	0.005275	2.68002	2	1089.54	-0.977831	67.5501	0	C1203	77.78	C1203	0.032
High	EVFQGVEKL	13	1	1	Q9Y330		0	7.83956e+06	0.001	0.01223	2.6784	2	1048.57	-1.12686	63.5444	0	C1203	44.44	A6802	0.0422
High	AQKPFGATY	17	1	1	Q96QD5		0	5.92526e+06	0.001	0.01471	2.67643	2	982.499	0.210669	46.3952	0	C1203	51.85	B1503	0.0009
High	THLKPGTLY	14	1	1	Q53EP0		0	1.17513e+07	0.001	0.01608	2.67542	2	1029.57	-0.573196	43.4562	0	C1203	37.04	B1503	0.1918
High	DVSNVIEKV	6	1	1	O94955		0	173516580	0.001	0.009806	2.67538	2	1002.55	-0.338192	61.619	0	C1203	44.44	A6802	0.0314
High	EIFDKIHSL	10	1	1	Q53GS7		0	4.04055e+06	0.001	0.016	2.67375	2	1101.59	-0.675433	64.71	0	C1203	48.15	A6802	0.0079
High	EIFSKNYRV	15	1	1	Q9NVU0		0	7.58629e+06	0.001	0.006129	2.66813	2	1155.62	-0.485799	49.9316	0	C1203	44.44	A6802	0.0224
High	GKTSLVQRY	3	1	1	O14966		0	867325	0.001	0.005008	2.66613	2	1051.59	-0.325577	35.9285	0	C1203	44.44	B1503	0.3972
High	GKVPVVVSY	1	1	1	Q9Y4C4		0	1.75841e+06	0.001	0.01509	2.6661	2	947.555	-0.64775	58.0962	0	C1203	51.85	B1503	0.0084
High	DTFYVQVLV	23	1	1	Q5BJD5		0	1.87863e+07	0.001	0.006448	2.6653	2	1083.57	-0.386156	98.9039	0	C1203	74.07	A6802	0.0353
High	EIFQKPFQTL	15	1	1	Q6DD88		0	5.35747e+06	0.001	0.01074	2.6514	2	1250.68	-0.0777626	75.326	0	C1203	40	A6802	0.91
High	GKGKFGNVY	20	3	3	O14965;Q96GD4;Q9UQB9		0	7.44113e+06	0.001	0.01457	2.64021	2	969.515	-0.288895	36.2076	0	C1203	40.74	B1503	0.0932
High	GKPPTWSEF	5	1	1	O95573		0	5.31097e+06	0.001	0.01203	2.64017	2	1048.51	-0.986772	63.0114	0	C1203	40.74	B1503	0.7285
High	STAAVFHAV	6	1	1	P57723		0	3.41984e+06	0.001	0.01038	2.63368	2	902.473	-0.553503	53.3405	0	C1203	70.37	A6802	0.0033
High	TTFEHDIQAL	13	1	1	Q01082		0	2.40229e+07	0.001	0.008253	2.63227	2	1174.57	-0.433726	66.1651	0	C1203	57.14	A6802	0.1885
High	NSASIFNTL	19	1	1	Q96HU1		0	9.60712e+06	0.001	0.005816	2.6321	2	966.489	-0.188414	81.9402	0	C1203	77.78	A6802	0.0549
High	AAYQSVRIL	13	1	1	Q9HAT2		0	6.06572e+06	0.001	0.0162	2.63079	2	1020.58	-1.87895	61.74	0	C1203	88.89	C1203	0.0263
High	VQKPDAANY	11	1	1	Q9NQW6		0	1.53423e+06	0.001	0.01236	2.62657	2	1005.5	-0.823664	36.0241	0	C1203	48.15	B1503	0.0102
High	EVAELFQRL	2	1	1	Q4V328		0	4.61428e+07	0.001	0.01223	2.62237	2	1104.6	-1.82011	77.8319	0	C1203	44.44	A6802	0.0205
High	EVLDILTRL	11	1	1	O75955		0	1.83423e+06	0.001	0.007528	2.62212	2	1071.64	-0.54581	92.5684	0	C1203	40.74	A6802	0.0191
High	TVISILNTI	6	1	1	O60716		0	1.40093e+06	0.001	0.007202	2.61827	2	973.593	-0.292118	97.9073	0	C1203	37.04	A6802	0.0184
High	KQALSGFGY	2	1	1	O75340		0	1.2008e+06	0.001	0.01359	2.61656	2	970.498	-1.54766	56.8742	0	C1203	40.74	B1503	0.0251
High	QKVLPVGVLY	7	1	1	Q03393		0	1.77248e+06	0.001	0.01086	2.61296	2	1115.68	-0.703737	75.0215	0	C1203	37.14	B1503	0.6775
High	LQQPRSLTY	11	1	1	P22102		0	3.94935e+06	0.001	0.01011	2.61094	2	1105.6	-1.46982	51.3775	0	C1203	51.85	B1503	0.0046
High	IKVIPTVF	16	1	1	P14902		0	1.52618e+07	0.001	0.01346	2.6095	2	916.586	-0.47138	78.3563	0	C1203	33.33	B1503	0.797
High	DIATILSKV	16	1	1	Q8NG31		0	5.20362e+06	0.001	0.01315	2.60836	2	959.577	-0.153541	86.0294	0	C1203	40.74	A6802	0.0368
High	EIADFFTEL	5	1	1	Q32NB8		0	1.05329e+06	0.001	0.009537	2.60763	2	1084.52	-0.515124	103.743	0	C1203	48.15	A6802	0.0068
High	FTSPLTHNV	14	1	1	Q96A29		0	8.39549e+06	0.001	0.01218	2.60025	2	1015.52	-0.914124	56.8305	0	C1203	81.48	A6802	0.0046
High	EVFQKVTEV	4	1	1	Q8IVJ1		0	1.98514e+06	0.001	0.008769	2.59922	2	1078.58	-0.587064	56.6927	0	C1203	48.15	A6802	0.0097
High	GKLISVEY	10	1	1	Q8IVG5		0	4.07673e+06	0.001	0.005604	2.59675	2	908.509	-0.0172523	59.2114	0	C1203	36.67	B1503	1.2584
High	DTTYINHVV	26	1	1	Q9UBR2		0	9.27615e+07	0.001	0.008638	2.594	2	1061.53	-0.622694	57.6893	0	C1203	70.37	A6802	0.0533
High	FQNESGSKY	7	1	1	O94806		0	619479	0.001	0.01323	2.5938	2	1059.47	-0.251774	32.0399	0	C1203	44.44	B1503	0.0071
High	SQFPGAITL	10	1	1	Q8WZ82		0	2.61806e+06	0.001	0.01459	2.59349	2	933.504	-0.235159	83.981	0	C1203	55.56	B1503	0.0055
High	QQFRNAPPF	20	1	1	O60830		0	1.61965e+07	0.001	0.0119	2.59202	2	1104.56	-0.802596	55.9925	0	C1203	33.33	B1503	0.035
High	ETIETINQL	8	1	1	Q96GM5		0	4.09418e+06	0.001	0.01427	2.59065	2	1060.55	-0.643156	70.8398	0	C1203	74.07	A6802	0.0071
High	YTVQFTTmV	3	1	1	Q7Z6Z7	M8(Oxidation)	0	907522	0.001	0.006702	2.58895	2	1105.52	0.246887	73.8403	0	C1203	70.37	A6802	0.0224
High	DVIDIMENL	9	1	1	P41279		0	742790	0.001	0.007795	2.5838	2	1061.52	-0.73063	104.096	0	C1203	40.74	A6802	0.0133
High	AKVVDKSEY	15	1	1	P42695		0	3.2202e+06	0.001	0.008582	2.57096	2	1038.55	-0.551919	27.9786	0	C1203	44.44	B1503	0.1616
High	ETFSSYISV	15	1	1	A5PLN9		0	1.93805e+07	0.001	0.01228	2.57062	2	1032.49	-0.700059	80.3696	0	C1203	77.78	A6802	0.0049
High	TVVEFPIRGL	8	1	1	Q13107		0	1.78499e+06	0.001	0.01326	2.56865	2	1130.66	0.347463	83.5179	0	C1203	31.43	A6802	0.2322
High	SQQPASGVAY	5	1	1	Q96KR1		0	0	0.001	0.014	2.56506	2	1007.48	-0.591582	45.556	0	C1203	34.29	B1503	0.0157
High	EVFGVIRSL	10	1	1	Q15393		0	4.91611e+06	0.001	0.01033	2.56005	2	1019.59	-0.393302	78.024	0	C1203	51.85	A6802	0.0286
High	GQISDPSRSY	2	1	1	Q14207		0	471050	0.001	0.01056	2.55737	2	1109.52	-0.61227	39.4011	0	C1203	34.29	B1503	0.015
High	NSVFVATFL	12	1	1	O00767		0	3.44772e+06	0.001	0.008199	2.55683	2	997.535	-0.147816	99.2863	0	C1203	66.67	A6802	0.2741
High	FASEVSNVL	5	1	1	Q92783		0	2.17741e+06	0.001	0.0121	2.55433	2	965.493	-0.440705	73.0095	0	C1203	88.89	C1203	0.0226
High	AVTKIIAKV	12	1	1	P49419		0	3.02617e+06	0.001	0.01316	2.55146	2	942.634	-0.248545	45.6563	0	C1203	44.44	A6802	0.1748
High	EVVDKINQV	16	1	1	Q8WXH0		0	8.95342e+06	0.001	0.01064	2.54525	2	1043.57	-0.149155	48.6129	0	C1203	44.44	A6802	0.0052
High	EAVGKIFSNV	8	1	1	Q03135		0	2.72208e+06	0.001	0.005773	2.54332	2	1063.58	-0.341152	64.5003	0	C1203	54.29	A6802	0.2155
High	FAYDGKDYL	9	12	12	P13747;P30462;P18463;Q95365;P30475;Q29836;Q31612;P30504;Q9TNN7;P30505;Q95604;Q29865		0	4.97985e+06	0.001	0.009406	2.54232	2	1091.5	-0.437425	66.2614	0	C1203	85.19	C1203	0.0064
High	EVIEKFDYV	10	1	1	Q92871		0	5.66877e+06	0.001	0.008656	2.54227	2	1141.58	-0.89842	67.835	0	C1203	40.74	A6802	0.0043
High	EVIPNSNFYV	13	1	1	Q9NTJ3		0	4.77148e+06	0.001	0.01342	2.5404	2	1181.58	0.13423	81.1396	0	C1203	25.71	A6802	0.0231
High	EVYGSVAKV	20	1	1	Q07864		0	2.0549e+07	0.001	0.01294	2.53968	2	951.514	-0.488254	47.3443	0	C1203	48.15	A6802	0.0054
High	ETSSImQKL	55	1	1	Q5VT06	M6(Oxidation)	0	4.82524e+06	0.001	0.004939	2.53773	2	1052.53	-0.52462	46.4411	0	C1203	74.07	A6802	0.0607
High	LVANIIQNV	15	1	1	O94915		0	6.21267e+06	0.001	0.0121	2.53159	2	983.588	-0.335477	79.5765	0	C1203	44.44	A6802	0.0264
High	LQAPPLTSL	5	1	1	Q96EX3		0	2.05518e+06	0.001	0.01472	2.52727	2	939.551	-0.183546	81.1078	0	C1203	48.15	B1503	0.0282
High	GKYASIILF	26	1	1	Q8TCB0		0	1.83222e+07	0.001	0.01263	2.52668	2	1011.59	-0.414832	82.6937	0	C1203	40.74	B1503	0.034
High	QGFPNRVVF	35	1	1	P35579		0	7.6252e+07	0.001	0.01287	2.52173	2	1063.57	-0.788684	68.9208	0	C1203	48.15	C1203	0.1618
High	DTVNFQDNL	1	1	1	Q9H0H3		0	1.33535e+06	0.001	0.01116	2.52038	2	1065.48	-0.785542	70.6141	0	C1203	66.67	A6802	0.3246
High	STAAVIQNV	7	1	1	Q6P4R8		0	2.67182e+06	0.001	0.01066	2.5199	2	902.494	-0.701864	57.0042	0	C1203	74.07	A6802	0.0054
High	NAFPEIFYT	27	1	1	Q99570		0	8.50057e+06	0.001	0.01474	2.51887	2	1101.52	-0.644233	93.4908	0	C1203	51.85	A6802	0.2743
High	MTADSRSQV	21	1	1	P60900		0	1.04965e+07	0.001	0.0106	2.50878	2	994.462	-0.618239	28.1364	0	C1203	74.07	A6802	0.0169
High	GKSSLIVSY	14	1	1	Q96L33		0	7.21391e+06	0.001	0.006804	2.50739	2	953.53	-0.630972	56.3973	0	C1203	51.85	B1503	0.0338
High	TAFSRLILI	8	1	1	Q6P2Q9		0	2.87786e+06	0.001	0.01577	2.50693	2	1033.64	-0.533187	88.2233	0	C1203	77.78	C1203	0.1119
High	FKGELIHVF	2	1	1	Q9H0P0		0	1.90912e+06	0.001	0.008895	2.50615	2	1089.61	-0.571942	69.9284	0	C1203	44.44	B1503	0.1705
High	EAINIIQGI	1	1	1	Q9NR81		0	7.99666e+06	0.001	0.006504	2.5022	2	970.556	-0.577321	86.6083	0	C1203	70.37	A6802	0.0326
High	FKIPSNTTL	4	1	1	Q8TEY7		0	2.16973e+07	0.001	0.006202	2.50188	2	1020.57	-0.145091	65.8427	0	C1203	51.85	B1503	0.1014
High	NTAETITRV	9	1	1	O96006		0	3.97656e+06	0.001	0.01496	2.49871	2	1004.54	-0.227435	43.194	0	C1203	77.78	A6802	0.0041
High	VmAPRTLVL	81	9	9	P01892;P30447;P05534;P18462;P30450;P30456;P30457;P01891;P10316	M2(Oxidation)	0	7.53266e+07	0.001	0.01402	2.49576	2	1015.6	-0.436349	66.5408	0	C1203	59.26	C1203	0.129
High	AAFRIVVm	86	1	1	Q8WUI4	M8(Oxidation)	0	1.57685e+07	0.001	0.01377	2.49458	2	922.518	0.0494675	66.1427	0	C1203	80	C1203	0.9346
High	KATNVVRLL	15	1	1	Q9NYU1		0	1.06966e+07	0.001	0.01476	2.49004	2	1013.65	-0.770203	53.1418	0	C1203	81.48	C1203	0.229
High	ETFEKTPVEV	9	1	1	Q15149		0	4.94013e+06	0.001	0.01064	2.48654	2	1178.59	-0.897845	57.3587	0	C1203	57.14	A6802	0.0202
High	YQKQPKIGY	5	1	1	Q68E01		0	1.97136e+06	0.001	0.008924	2.48042	2	1124.61	-0.633857	38.322	0	C1203	44.44	B1503	0.0059
High	EVFEGDIQQL	1	1	1	P20908		0	1.12546e+06	0.001	0.007058	2.47313	2	1177.57	-0.0572135	77.4685	0	C1203	45.71	A6802	0.0995
High	KGFPHVIYA	22	1	1	Q13485		0	1.51847e+07	0.001	0.01327	2.47209	2	1031.57	-0.712878	55.4897	0	C1203	18.52	C1203	0.7882
High	AHLNPAVTF	7	1	1	Q92482		0	4.75799e+06	0.001	0.008193	2.46946	2	969.512	-3.87731	61.2134	0	C1203	40.74	B1503	0.1165
High	GQLPGLHEY	5	1	1	Q8TAT6		0	1.31465e+07	0.001	0.01233	2.46625	2	1013.5	-0.831053	56.9416	0	C1203	48.15	B1503	0.0052
High	QAYPEVRIV	13	1	1	Q08211		0	1.19697e+07	0.001	0.008719	2.46528	2	1074.59	-1.79468	63.9843	0	C1203	92.59	C1203	0.1422
High	LVIDVIHEV	2	1	1	Q9HAU8		0	1.65984e+06	0.001	0.008638	2.45826	2	1036.6	-0.554009	79.0345	0	C1203	48.15	A6802	0.004
High	RLFKDQLVY	7	1	1	Q9Y3I1		0	5.27134e+06	0.001	0.01467	2.45675	2	1181.67	-0.817197	60.4686	0	C1203	48.15	B1503	0.0181
High	EGAAVFWNV	17	1	1	Q9NWS8		0	7.13972e+06	0.001	0.01414	2.45047	2	992.484	-0.0938992	89.1359	0	C1203	40.74	A6802	0.23
High	EAAPGALGQV	2	1	1	Q8WYQ5		0	2.04151e+06	0.001	0.009721	2.4494	2	912.478	-0.287368	58.3224	0	C1203	60	A6802	0.1892
High	DTVQFAEYI	7	1	1	P49721		0	1.3156e+06	0.001	0.007241	2.4494	2	1085.51	-0.281216	89.1257	0	C1203	59.26	A6802	0.1114
High	GQIEPSFVF	7	1	1	O00443		0	1.74802e+06	0.001	0.01506	2.44758	2	1023.51	-0.642576	90.4275	0	C1203	37.04	B1503	0.0074
High	ETFPANIQVV	11	1	1	Q5VYK3		0	6.01283e+06	0.001	0.01055	2.44411	2	1117.59	-0.598553	82.3744	0	C1203	60	A6802	0.0208
High	EVAGmLIGL	30	1	1	Q16850	M5(Oxidation)	0	1.30044e+07	0.001	0.009551	2.44395	2	918.496	-0.440885	85.8169	0	C1203	48.15	A6802	0.0084
High	TLFGSVIRY	3	1	1	P09871		0	2.7243e+06	0.001	0.008263	2.43818	2	1055.59	-0.360942	78.331	0	C1203	51.85	B1503	0.1246
High	EISSILQEL	27	2	2	Q96L14;Q5SW79		0	2.4122e+07	0.001	0.009154	2.43621	2	1031.56	-0.614994	95.2455	0	C1203	48.15	A6802	0.0689
High	HTSPLTQIRL	3	1	1	Q96BP3		0	2.32308e+06	0.001	0.008498	2.4306	2	1165.67	-0.899992	61.7005	0	C1203	51.43	A6802	0.5137
High	IKTVYPASY	3	1	1	Q9H211		0	1.4264e+06	0.001	0.009952	2.42632	2	1041.56	-0.323048	53.3003	0	C1203	40.74	B1503	0.0639
High	HTAIGAHPV	9	1	1	Q92567		0	1.93912e+06	0.001	0.005801	2.42595	2	902.484	-0.214826	30.8365	0	C1203	70.37	A6802	0.032
High	GKVKSGGTY	15	1	1	P55017		0	2.22651e+06	0.001	0.01189	2.42315	2	896.483	-0.422059	17.8053	0	C1203	40.74	B1503	0.1015
High	ITFPGIKLI	11	1	1	O75387		0	1.75252e+06	0.001	0.0159	2.42109	2	1001.64	-0.223179	91.4947	0	C1203	77.78	C1203	0.1062
High	EIAGPGFINV	2	1	1	P54136		0	1.90437e+06	0.001	0.01041	2.39995	2	1016.54	0.0639711	84.6475	0	C1203	31.43	A6802	0.0346
High	ETFFGVQWV	23	1	1	P32970		0	1.05908e+07	0.001	0.01491	2.39885	2	1112.54	-0.0971436	104.28	0	C1203	74.07	A6802	0.0235
High	HTFFIKDSL	10	1	1	Q8NFG4		0	4.33624e+06	0.001	0.008235	2.39885	2	1107.58	-0.38639	63.4578	0	C1203	70.37	A6802	0.0606
High	TTSNTVSKL	14	1	1	Q6NZI2		0	3.02922e+06	0.001	0.01507	2.38556	2	950.515	-0.0904218	35.0194	0	C1203	74.07	A6802	0.2818
High	mAAERVKAW	1	1	1	Q8IXM6	M1(Oxidation)	0	690141	0.001	0.009953	2.38342	2	1077.55	-0.768227	39.211	0	C1203	51.85	C1203	0.2878
High	EVFAWNNEV	6	1	1	P49419		0	1.31899e+07	0.001	0.01621	2.37647	2	1107.51	-0.601354	81.5432	0	C1203	44.44	A6802	0.0077
High	FTVPHTHVF	2	1	1	Q8NFZ0		0	3.40957e+06	0.001	0.01317	2.36321	2	1084.56	-0.834578	61.3112	0	C1203	74.07	C1203	0.0074
High	RTYPVEILY	13	1	1	Q14562		0	9.38828e+06	0.001	0.005089	2.36075	2	1153.62	-0.459345	73.1962	0	C1203	81.48	C1203	0.0382
High	TAYPQVVVV	30	1	1	Q9ULI2		0	4.12884e+07	0.001	0.01023	2.35779	2	975.551	-0.103958	76.6392	0	C1203	96.3	C1203	0.008
High	EIFDGNVAHI	14	1	1	P46939		0	5.23736e+06	0.001	0.00756	2.35595	2	1114.55	-0.674485	69.1683	0	C1203	31.43	A6802	0.0393
High	STIFPLDGV	13	1	1	O60318		0	1.99695e+06	0.001	0.009504	2.35285	2	948.504	-0.205268	91.92	0	C1203	66.67	A6802	0.0135
High	EQYEQILAF	7	2	2	Q2VIR3;P41091		0	4.54835e+06	0.001	0.006634	2.35284	2	1140.56	-0.984983	89.6484	0	C1203	44.44	B1503	0.007
High	QSAEIWEKL	11	1	1	Q7L4I2		0	3.25036e+06	0.001	0.005322	2.35112	2	1103.57	-0.804729	69.6638	0	C1203	74.07	A6802	0.5634
High	EVYEGEVTEL	4	1	1	Q9Y265		0	1.51162e+06	0.001	0.01372	2.34952	2	1167.54	-0.164333	69.4568	0	C1203	37.14	A6802	0.0819
High	ELFPIQMEGV	4	1	1	O96008		0	1.15314e+06	0.001	0.007308	2.34467	2	1162.58	0.214409	96.9865	0	C1203	34.29	A6802	0.3394
High	SQYQGVVVY	27	1	1	Q9Y221		0	1.13643e+08	0.001	0.005066	2.34083	2	1042.52	-0.788907	65.4644	0	C1203	51.85	B1503	0.0007
High	RQIVSGLKY	3	1	1	Q9NYY3		0	2.56716e+06	0.001	0.01529	2.33452	2	1063.63	-0.563695	48.4057	0	C1203	40.74	B1503	0.0041
High	AAAPQLLIV	25	1	1	Q10589		0	3.25739e+07	0.001	0.01474	2.33319	2	895.561	-0.655261	87.9065	0	C1203	92.59	C1203	0.2252
High	DTHHLVNYI	12	1	1	Q01581		0	1.08792e+07	0.001	0.007839	2.33273	2	1111.55	-0.836378	56.9699	0	C1203	62.96	A6802	0.1144
High	AIAPIIAAV	12	1	1	Q9BQ52		0	4.84123e+06	0.001	0.007605	2.33036	2	838.54	0.0717741	86.7666	0	C1203	55.56	A6802	0.022
High	KVPPFTFHV	68	1	1	Q6NZI2		0	1.99399e+07	0.001	0.008218	2.32474	2	1071.6	-0.970067	67.6552	0	C1203	44.44	A6802	0.1402
High	YTSGPGSRI	19	1	1	P05787		0	1.68311e+07	0.001	0.01478	2.32412	2	937.473	-0.519588	36.8358	0	C1203	70.37	A6802	0.0996
High	YTFGRIVIY	5	1	1	Q9UBB9		0	5.88395e+06	0.001	0.01453	2.32184	2	1131.62	-0.695655	82.0244	0	C1203	85.19	C1203	0.0068
High	VAYPLYILY	4	1	1	Q99567		0	976981	0.001	0.008692	2.31973	2	1114.62	-0.3174	102.791	0	C1203	92.59	C1203	0.0295
High	EVISKLYAV	27	1	1	P50990		0	4.20686e+08	0.001	0.01351	2.31834	2	1021.59	-0.8161	64.911	0	C1203	40.74	A6802	0.0052
High	GQAHPSASY	6	1	1	Q15652		0	562519	0.001	0.01484	2.29316	2	917.411	-0.411048	27.7988	0	C1203	40.74	B1503	0.0068
High	EVMKYITSL	4	1	1	P11586		0	2.90989e+06	0.001	0.006755	2.28696	2	1083.57	-0.801736	72.6587	0	C1203	40.74	A6802	0.0231
High	HQAIHTIEY	6	2	2	Q93050;Q9HBG4		0	1.1923e+06	0.001	0.00709	2.28262	2	1111.55	-0.616739	42.9747	0	C1203	48.15	B1503	0.0042
High	TIPDFIFANV	13	1	1	P61073		0	3.49318e+06	0.001	0.01213	2.26955	2	1136.6	-0.11698	104.306	0	C1203	28.57	A6802	0.1469
High	AKGPTLTVY	12	1	1	Q13616		0	5.85047e+06	0.001	0.01426	2.26952	2	949.534	-1.2375	54.141	0	C1203	51.85	B1503	0.0107
High	ETFKNSFVEA	12	1	1	Q6NUM9		0	1.21276e+07	0.001	0.005858	2.2613	2	1171.56	-0.412868	58.0023	0	C1203	25.71	A6802	0.2715
High	AAQPQPSVA	9	1	1	Q96KR1		0	5.98111e+06	0.001	0.0153	2.25467	2	868.452	-0.0382214	37.5409	0	C1203	55.56	C1203	2.9014
High	QTVGVIVRL	4	1	1	O00267		0	1.63386e+06	0.001	0.01441	2.25431	2	984.62	-0.483263	69.9146	0	C1203	77.78	A6802	0.0189
High	YAAELIERV	2	1	1	Q9Y4B6		0	2.01977e+06	0.001	0.01381	2.24581	2	1063.58	-0.790843	64.6154	0	C1203	88.89	A6802	0.0212
High	TVFNFPVSI	10	1	1	P28562		0	3.18265e+06	0.001	0.01551	2.24524	2	1023.55	-0.407007	101.728	0	C1203	40.74	A6802	0.0165
High	DVAPVSFFL	4	1	1	O14791		0	2.49294e+06	0.001	0.01002	2.24215	2	994.524	-0.67472	107.801	0	C1203	48.15	A6802	0.0089
High	IQNDRQLQY	2	1	1	Q9UBB9		0	817867	0.001	0.009367	2.23699	2	1177.6	-0.454075	43.7496	0	C1203	44.44	B1503	0.0071
High	QKYAGKDGY	15	1	1	P31949		0	907909	0.001	0.01308	2.23649	2	1029.5	-0.320459	24.4137	0	C1203	40.74	B1503	0.2254
High	EASAVIQGL	17	1	1	Q8IWA0		0	3.96754e+07	0.001	0.01388	2.23614	2	887.483	-0.203316	68.9092	0	C1203	81.48	A6802	0.075
High	FAMPYFIQV	4	1	1	Q00610		0	1.694e+06	0.001	0.00937	2.22977	2	1115.56	-0.187888	104.822	0	C1203	88.89	C1203	0.0468
High	ETYPDAVKI	3	1	1	Q8WV22		0	5.9135e+06	0.001	0.01068	2.22686	2	1035.54	0.0703986	59.0847	0	C1203	74.07	A6802	0.0167
High	GKAPNILLY	1	1	1	P50747		0	1.84136e+06	0.001	0.01533	2.22313	2	988.583	0.243789	68.2179	0	C1203	55.56	B1503	0.0213
High	ETFEHPNVV	23	1	1	Q00534		0	5.13953e+07	0.001	0.0116	2.21931	2	1071.51	-0.612226	53.8774	0	C1203	81.48	A6802	0.0088
High	ASYPELRLF	5	1	1	O75718		0	8.08258e+06	0.001	0.01297	2.21705	2	1095.58	-0.947725	82.949	0	C1203	77.78	C1203	0.1506
High	FQKVITEY	7	1	1	Q7KZF4		0	1.82472e+06	0.001	0.01429	2.19968	2	1027.54	-1.38204	54.7066	0	C1203	56.67	B1503	0.1722
High	EIADLNVRI	12	1	1	Q6KB66		0	5544758	0.001	0.007366	2.19675	2	1042.59	0.203117	72.1518	0	C1203	40.74	A6802	0.0095
High	YSFYLPIAA	10	1	1	P14324		0	5.54394e+06	0.001	0.008243	2.18591	2	1044.54	-0.228598	99.4732	0	C1203	44.44	C1203	0.3945
High	GKEKLPRYY	4	1	1	P62280		0	2.37203e+06	0.001	0.01229	2.17748	2	1153.64	0.0614649	37.6346	0	C1203	44.44	B1503	0.9198
High	SAVPFKILY	12	1	1	P10586		0	7.61098e+06	0.001	0.008572	2.16793	2	1037.6	-0.899112	80.382	0	C1203	85.19	C1203	0.0483
High	RKPDQVFQSY	7	1	1	Q96K76		0	1.40104e+06	0.001	0.01341	2.13577	2	1267.64	-0.103685	46.1638	0	C1203	40	B1503	0.2794
High	IVTEIISEI	10	1	1	Q9BPX3		0	1.29318e+07	0.001	0.007321	2.13428	2	1016.59	-0.241492	89.2636	0	C1203	40.74	A6802	0.1107
High	TTFPRPVTV	22	1	1	Q15233		0	2.85316e+08	0.001	0.01167	2.13299	2	1017.57	-0.959497	61.4282	0	C1203	88.89	A6802	0.0056
High	EAFDRSFEV	25	1	1	Q7Z4W1		0	1.04913e+08	0.001	0.008791	2.12647	2	1099.5	-0.537413	65.192	0	C1203	85.19	A6802	0.0048
High	FAHLPKSTF	1	1	1	P26641		0	2.91516e+06	0.001	0.006828	2.11204	2	1047.56	-1.44598	54.4302	0	C1203	74.07	C1203	0.0247
High	ESSPFVERL	17	1	1	P14625		0	2.41807e+07	0.001	0.005783	2.09518	2	1063.54	-0.902783	62.9728	0	C1203	81.48	A6802	0.1754
High	EAYDQRQDTV	9	1	1	Q99426		0	1.46437e+06	0.001	0.009306	2.08026	2	1224.55	-0.332895	36.5468	0	C1203	60	A6802	0.51
High	ETADVKASV	12	1	1	Q8N1F7		0	5.67127e+06	0.001	0.01564	2.07864	2	919.473	-0.287497	36.6402	0	C1203	74.07	A6802	0.0022
High	EVFSYHQGL	4	1	1	Q9Y285		0	2.69916e+06	0.001	0.01364	2.07181	2	1079.52	0.0104665	60.5272	0	C1203	44.44	A6802	0.0588
High	ETKDPSSGQEV	1	1	1	Q9UKV3		0	220927	0.001	0.009722	2.05469	2	1176.54	-0.874148	27.8848	0		0	A6802	1.6122
High	ETQNVVTKV	8	1	1	Q96MW1		0	5.45004e+06	0.001	0.01315	2.03359	2	1017.56	-1.67811	40.0897	0	C1203	70.37	A6802	0.0281
High	GKISKQEAY	2	1	1	P20936		0	335979	0.001	0.01464	2.02537	2	1023.55	0.0716812	26.0507	0	C1203	40.74	B1503	0.1051
High	YASDVQLIL	9	1	1	Q8NHQ8		0	1.68042e+07	0.001	0.01061	2.02107	2	1021.56	-0.325379	87.7376	0	C1203	88.89	C1203	0.0293
High	ESSYIFVSV	15	1	1	P42336		0	1.23071e+07	0.001	0.01248	2.01823	2	1030.51	-0.452892	86.5194	0	C1203	74.07	A6802	0.0172
High	RGFGFVTY	7	3	3	Q32P51;P09651;P51991		0	6.38926e+06	0.001	0.01421	2.00812	2	946.478	-0.607134	71.2018	0	C1203	33.33	B1503	0.7393
High	EVIGGTNHTL	10	1	1	Q9P2E3		0	3.21966e+06	0.001	0.01546	2.00383	2	1040.54	-0.571511	47.1879	0	C1203	40	A6802	0.0727
High	ETADVKASVL	7	1	1	Q8N1F7		0	6.64053e+06	0.001	0.01143	1.99533	2	1032.56	-1.10738	50.78	0	C1203	57.14	A6802	0.0866
High	QIAEIIQWV	5	1	1	Q9Y5S2		0	1.87571e+06	0.001	0.01499	1.93944	2	1099.61	-0.110719	100.145	0	C1203	48.15	A6802	0.0424
High	AmYGGLVLF	9	1	1	Q9H3K2	M2(Oxidation)	0	7.16688e+06	0.001	0.005562	1.93473	2	986.501	-0.476501	98.0061	0	C1203	44.44	B1503	0.0186
High	HTVGFILQL	12	1	1	Q5SRE5		0	3.51707e+07	0.001	0.00827	1.9339	2	1027.59	-0.691192	87.0007	0	C1203	77.78	A6802	0.0263
High	ELSDVLIYL	6	1	1	Q9H773		0	9.32387e+06	0.001	0.01481	1.9059	2	1064.59	-0.335875	105.688	0	C1203	48.15	A6802	0.03
High	VVPQFVVFY	13	1	1	O14949		0	9.2142e+06	0.001	0.009971	1.88326	2	1097.6	-0.627531	101.197	0	C1203	48.15	C1203	0.8996
High	ETAPRTIFQRV	4	1	1	Q9UBB4		0	2.14459e+07	0.001	0.008988	1.60161	3	1317.73	0.0921262	55.2781	0		0	A6802	0.5705
High	FAYPAIRYLL	1	1	1	P51398		0	1.63781e+06	0.001	0.01192	1.17775	2	1226.69	-0.462013	93.4586	0	C1203	68.57	C1203	0.2327
High	FLYPFPLAL	9	1	1	Q5BJD5		0	1.14673e+07	0.002	0.0196	3.00224	2	1080.61	-0.367332	107.866	0	C1203	59.26	C1203	0.0127
High	GQRKGAGSVF	26	1	1	P62917		0	1.50974e+07	0.002	0.0167	2.98456	2	1006.54	-0.502018	30.914	0	C1203	42.86	B1503	0.0549
High	SGYYRVSSY	6	1	1	Q9UNQ0		0	1.68503e+06	0.002	0.02245	2.97895	2	1081.49	-1.2237	48.2729	0	C1203	44.44	C1203	0.065
High	AQTDPTTGY	1	1	1	Q9Y4K0		0	482874	0.002	0.02317	2.9126	2	953.42	-1.56074	40.2138	0	C1203	44.44	B1503	0.0073
High	RQAPTGLGL	15	1	1	Q9BX59		0	6.5437e+06	0.002	0.02215	2.86438	2	912.525	-1.49413	52.0063	0	C1203	51.85	B1503	0.0219
High	YTANFVNAI	13	1	1	Q7L1W4		0	5.49593e+06	0.002	0.01756	2.85538	2	1012.51	-0.519854	77.7136	0	C1203	70.37	A6802	0.0086
High	KAYHEQLTV	5	1	1	Q9BQE3		0	0	0.002	0.01682	2.85221	2	1088.57	-0.76418	40.0139	0	C1203	85.19	C1203	0.0888
High	KAADIASKV	4	1	1	O95671		0	633509	0.002	0.02002	2.83483	2	902.53	-0.321611	33.0578	0	C1203	81.48	C1203	0.1093
High	NIANHFFTV	17	1	1	Q16222		0	8.78248e+06	0.002	0.02266	2.83335	2	1062.54	-0.642763	73.944	0	C1203	44.44	A6802	0.0348
High	KATPLVLKA	3	1	1	O75354		0	938787	0.002	0.01722	2.80655	2	940.619	-0.287388	44.3775	0	C1203	51.85	C1203	2.1789
High	AAAELIKEV	9	1	1	Q13425		0	2.99968e+06	0.002	0.01652	2.79279	2	943.545	-0.825314	58.1752	0	C1203	96.3	C1203	0.2775
High	GAFGKPSSL	10	1	1	Q8IVT2		0	2.37655e+06	0.002	0.02026	2.78583	2	863.462	-0.124578	47.8381	0	C1203	85.19	C1203	0.0147
High	TVADVDEKA	3	1	1	Q13118		0	1.37465e+06	0.002	0.02273	2.77293	2	947.468	-0.328559	33.0935	0	C1203	7.41	A6802	0.1722
High	GKKVEGTAF	5	1	1	P01024		0	858472	0.002	0.02034	2.76993	2	936.514	-0.674282	30.6963	0	C1203	29.63	B1503	0.0816
High	HVGDIIKEV	20	2	2	Q14168;Q9NZW5		0	1.85708e+07	0.002	0.0211	2.75847	2	1009.57	-0.590416	53.9815	0	C1203	51.85	A6802	0.0853
High	TKFGGIVVL	7	1	1	O15118		0	1.11296e+08	0.002	0.02052	2.75822	2	933.577	-0.263091	77.4786	0	C1203	55.56	B1503	0.0965
High	FTAKVWDAV	2	1	1	Q9Y3F4		0	3.5791e+06	0.002	0.02041	2.75639	2	1036.55	-0.892981	69.5002	0	C1203	74.07	A6802	0.0355
High	TQTLVREY	9	1	1	P26641		0	1.36793e+06	0.002	0.02217	2.69878	2	1009.53	-1.10183	46.4815	0	C1203	40	B1503	0.9224
High	KAISGVHTV	20	2	2	Q2VIR3;P41091		0	1.28097e+07	0.002	0.02024	2.68938	2	911.53	-0.602535	31.3225	0	C1203	85.19	C1203	0.0197
High	RKLDQVSQF	2	1	1	O60502		0	6.11329e+06	0.002	0.01668	2.68767	2	1120.61	-0.628416	44.117	0	C1203	37.04	B1503	0.0086
High	GQNKKVMIY	6	2	2	Q14839;Q8TDI0		0	3.09144e+06	0.002	0.01744	2.67155	2	1080.59	-0.214429	37.6276	0	C1203	40.74	B1503	0.0144
High	AATEIVERV	11	1	1	Q9UID3		0	5.47209e+06	0.002	0.01759	2.66518	2	987.546	-1.18206	50.6583	0	C1203	85.19	A6802	0.27
High	ETVGILHKV	17	1	1	Q96HH9		0	2.34009e+07	0.002	0.02292	2.65943	2	995.587	-1.0671	47.9817	0	C1203	70.37	A6802	0.0023
High	ETFAFIQQL	9	1	1	Q8WXH0		0	4.45621e+06	0.002	0.02281	2.64915	2	1096.57	-0.177854	96.0909	0	C1203	74.07	A6802	0.0148
High	VKVIDRILY	1	1	1	O75533		0	2.40473e+06	0.002	0.01993	2.63952	2	1118.69	-0.624674	62.0513	0	C1203	44.44	B1503	0.1472
High	RKYGNANVW	3	2	2	P67775;P62714		0	4.75223e+06	0.002	0.01685	2.63692	2	1107.57	-0.603227	41.3363	0	C1203	11.11	B1503	0.1139
High	GKRLDVTGF	2	1	1	Q9UIY3		0	2.1251e+06	0.002	0.0175	2.62298	2	992.552	-0.425956	49.1091	0	C1203	33.33	B1503	0.1662
High	SKLKNGLTF	4	1	1	Q6ZSZ5		0	1.60018e+06	0.002	0.02111	2.62207	2	1007.59	-0.327486	47.1936	0	C1203	37.04	B1503	0.0212
High	GQWKIRAY	1	1	1	P01024		0	1.79337e+06	0.002	0.02305	2.61088	2	1021.56	0.0955667	48.9328	0	C1203	33.33	B1503	0.1646
High	GKIIKPLQY	10	1	1	Q13823		0	4.79389e+06	0.002	0.02253	2.61028	2	1059.65	-2.83822	49.4724	0	C1203	44.44	B1503	0.1046
High	STLFLPHYA	8	1	1	Q5T447		0	2.17094e+06	0.002	0.01858	2.60626	2	1048.55	-0.970569	71.5935	0	C1203	33.33	A6802	0.5246
High	NAFSFPSEI	3	1	1	P17024		0	949242	0.002	0.02141	2.60588	2	1011.48	-0.214926	88.2645	0	C1203	81.48	A6802	0.0796
High	HQKLGIAY	14	1	1	Q9HB58		0	3.50158e+06	0.002	0.02109	2.58921	2	929.52	-0.305717	43.6927	0	C1203	36.67	B1503	0.1127
High	EVAPSFGTL	17	1	1	Q5SRE5		0	2.32395e+07	0.002	0.01896	2.58913	2	920.472	-0.55505	77.1695	0	C1203	51.85	A6802	0.0246
High	VTFSGIHLL	10	1	1	Q8N3Z3		0	2.32761e+06	0.002	0.0228	2.58314	2	986.566	-0.534633	83.6135	0	C1203	81.48	C1203	0.0373
High	GKLVQIEY	20	1	1	P25787		0	2.52931e+07	0.002	0.02121	2.58228	2	949.535	-0.787547	59.7502	0	C1203	36.67	B1503	1.737
High	EAIDFIDSI	9	1	1	P28562		0	5.42077e+06	0.002	0.01679	2.57932	2	1022.5	-0.462225	94.7986	0	C1203	74.07	A6802	0.0194
High	LKFPGLHSF	2	1	1	Q15165		0	3.76741e+06	0.002	0.02235	2.57186	2	1045.58	-0.970294	70.8309	0	C1203	40.74	B1503	0.0023
High	SAADIPINI	7	1	1	P21333		0	4.39206e+06	0.002	0.01748	2.5543	2	913.499	-0.291708	80.8354	0	C1203	81.48	A6802	0.0244
High	SATGQKLYV	4	1	1	Q9Y2M0		0	1.06739e+06	0.002	0.01906	2.54989	2	966.525	-0.317857	45.2899	0	C1203	81.48	A6802	1.0581
High	KQFEKQVEL	2	1	1	Q14204		0	1.12122e+06	0.002	0.01697	2.54152	2	1148.63	-0.3382	43.7579	0	C1203	51.85	B1503	0.0316
High	EAFHYIFNV	26	1	1	Q9UEY8		0	1.37946e+08	0.002	0.01799	2.53541	2	1139.55	-0.322898	83.712	0	C1203	81.48	A6802	0.0266
High	AQLPEKVEY	11	1	1	P51532		0	6.2002e+06	0.002	0.02298	2.52187	2	1076.56	-0.78243	53.3335	0	C1203	55.56	B1503	0.006
High	GKNEVTLEF	10	1	1	Q08945		0	5.66739e+06	0.002	0.01658	2.51756	2	1036.53	-0.656289	64.2379	0	C1203	40.74	B1503	0.0293
High	EVSNIVKEA	9	1	1	P63172		0	3.15888e+06	0.002	0.02011	2.50949	2	988.531	0.0527633	44.4234	0	C1203	14.81	A6802	0.2185
High	AAFPGASLY	9	1	1	Q15038		0	3.81499e+06	0.002	0.01722	2.5033	2	896.451	-0.273224	76.6422	0	C1203	88.89	C1203	0.0078
High	RAFDQGADAIY	2	1	1	Q9UDW1		0	5.50237e+06	0.002	0.0224	2.49403	2	1226.58	-0.75995	57.4792	0		0	B1503	0.8623
High	AARPATSTL	5	1	1	Q04637		0	3.7169e+06	0.002	0.02238	2.48218	2	887.494	-0.134013	34.3286	0	C1203	88.89	C1203	0.0128
High	RKIPVPANRY	3	1	1	Q9NRX1		0	2.76385e+06	0.002	0.02125	2.47291	3	1213.72	-0.0391514	38.4536	0	C1203	31.43	B1503	0.0568
High	TTSAVTVKS	4	1	1	P61513		0	2.76208e+06	0.002	0.02129	2.47095	2	893.494	-0.191784	28.5686	0	C1203	37.04	A6802	1.5634
High	YKKQFSQY	13	1	1	P46777		0	3.75365e+06	0.002	0.02195	2.43892	2	1091.55	-0.318775	34.2033	0	C1203	43.33	B1503	1.1827
High	AKQPHVGDY	3	1	1	Q06323		0	639224	0.002	0.02058	2.43074	2	1014.5	-0.540012	31.8323	0	C1203	51.85	B1503	0.152
High	YAFLREAL	6	1	1	Q15048		0	2.54556e+06	0.002	0.02217	2.4261	2	982.536	0.383743	72.7939	0	C1203	83.33	C1203	0.5827
High	NQVIFPVSY	12	1	1	Q9GZZ1		0	3.41653e+06	0.002	0.01929	2.42299	2	1066.56	-0.792737	84.6406	0	C1203	44.44	B1503	0.0233
High	NIAQVLAEL	6	2	2	Q10567;P63010		0	638947	0.002	0.02318	2.4164	2	970.557	-0.137113	101.935	0	C1203	44.44	A6802	0.0771
High	RKVYNISEF	1	1	1	O60427		0	4.62999e+06	0.002	0.02301	2.40885	2	1155.61	-0.802696	52.9902	0	C1203	37.04	B1503	0.0143
High	DVTQIVEIL	8	1	1	Q86XP3		0	4.10286e+06	0.002	0.01747	2.39722	2	1029.58	-0.960256	102.187	0	C1203	40.74	A6802	0.4342
High	FTTHILEVI	12	1	1	P15927		0	3.01177e+07	0.002	0.0169	2.37251	2	1072.6	-0.526091	82.3981	0	C1203	66.67	A6802	0.3783
High	EIVQFFSGL	6	3	3	P31943;P55795;P52597		0	1.3582e+06	0.002	0.02061	2.36363	2	1039.55	-0.798191	101.378	0	C1203	37.04	A6802	0.1446
High	AQAPAQSQF	6	1	1	Q92793		0	1.38836e+06	0.002	0.01681	2.34153	2	947.458	-0.047341	44.6827	0	C1203	44.44	B1503	0.0022
High	QQVPVNQVF	11	1	1	P39023		0	5.47732e+06	0.002	0.02027	2.33893	2	1058.56	-0.506131	69.0696	0	C1203	40.74	B1503	0.0054
High	EISGIVEVV	3	1	1	P35244		0	6.05397e+06	0.002	0.01893	2.32089	2	944.53	-0.308779	81.109	0	C1203	51.85	A6802	0.0219
High	KQFRPPmGGY	6	1	1	Q9UKK9	M7(Oxidation)	0	2.16435e+06	0.002	0.0197	2.31725	2	1196.59	-0.683968	42.765	0	C1203	42.86	B1503	0.0437
High	EAELEKLSL	5	1	1	Q8WUX9		0	2.27264e+06	0.002	0.01639	2.31593	2	1031.56	-0.388017	88.0881	0	C1203	77.78	A6802	6.3745
High	TATDIRVTL	3	1	1	P11047		0	8.11574e+06	0.002	0.02228	2.30971	2	989.562	-0.824732	62.6763	0	C1203	85.19	C1203	0.0523
High	AKLPTTAF	5	1	1	Q7Z333		0	2.14786e+06	0.002	0.02313	2.30569	2	848.488	-0.016309	56.79	0	C1203	30	B1503	0.3803
High	RQLYLSERY	1	1	1	Q5T953		0	1.62516e+06	0.002	0.02282	2.29905	2	1227.65	1.92801	48.5632	0	C1203	37.04	B1503	0.033
High	EIYSESHRV	12	1	1	Q96I51		0	2.8369e+06	0.002	0.0193	2.29763	2	1119.54	-0.260072	34.5243	0	C1203	44.44	A6802	0.0266
High	QAIGAIRTL	2	1	1	Q9H7E9		0	1.26016e+06	0.002	0.01797	2.29572	2	942.573	-0.295744	58.5286	0	C1203	88.89	C1203	0.026
High	SQDPGTHVV	10	1	1	Q9H8H0		0	5.2628e+06	0.002	0.01625	2.29001	2	939.453	-0.346954	33.8692	0	C1203	48.15	B1503	0.7661
High	DVADVLLQA	3	2	2	Q8IWZ3;O75179		0	2.01826e+06	0.002	0.02273	2.27809	2	943.509	-0.164622	87.1514	0	C1203	11.11	A6802	0.0316
High	TVARPSVPA	27	1	1	P08174		0	1.57764e+08	0.002	0.01761	2.26567	2	897.515	-0.86725	41.2311	0	C1203	7.41	A6802	0.2629
High	ETADVIAKV	36	1	1	O43617		0	188501349	0.002	0.01805	2.26125	2	945.524	-1.35264	51.7967	0	C1203	77.78	A6802	0.0012
High	AQSPELRTY	3	1	1	Q5T280		0	638309	0.002	0.0227	2.2581	2	1064.54	-0.434562	44.0091	0	C1203	59.26	B1503	0.0034
High	LTTAPPPGL	4	1	1	Q14332		0	3.00697e+06	0.002	0.01684	2.25353	2	866.498	-0.0285701	67.1034	0	C1203	70.37	A6802	0.6468
High	KIVDWAIQV	6	1	1	Q709F0		0	1.96879e+06	0.002	0.01636	2.21625	2	1071.62	-0.648688	79.4665	0	C1203	44.44	A6802	0.4819
High	EIFPVSFHV	11	1	1	Q5THK1		0	1.17258e+07	0.002	0.0206	2.21477	2	1074.56	0.374253	86.7516	0	C1203	48.15	A6802	0.0055
High	GKSTVINAm	3	1	1	O95140	M9(Oxidation)	0	775940	0.002	0.01811	2.19823	2	936.482	-0.288616	29.7656	0	C1203	37.04	B1503	0.2775
High	SKSGGDYAY	4	3	3	Q9GIP4;Q8MH63;Q01650		0	1.17947e+06	0.002	0.01851	2.19686	2	947.41	-0.141803	31.3531	0	C1203	44.44	B1503	0.1166
High	NTIPLFVQL	8	2	2	P35222;P14923		0	3.7924e+07	0.002	0.02022	2.19473	2	1044.61	-0.855388	102.378	0	C1203	77.78	A6802	0.0126
High	SAYAQIVQF	19	1	1	Q9Y4W6		0	2.19184e+07	0.002	0.02309	2.16721	2	1026.53	-0.180362	80.8945	0	C1203	77.78	C1203	0.0098
High	QQALHTVQY	10	1	1	Q5SRE5		0	2.35091e+06	0.002	0.01839	2.1443	2	1087.55	-0.405862	45.53	0	C1203	44.44	B1503	0.0075
High	QVSNLIHYL	1	1	1	Q6PIU2		0	2.48965e+06	0.002	0.01672	2.09183	2	1086.59	-0.0713149	75.7548	0	C1203	44.44	A6802	0.0623
High	GKKKYETEF	3	1	1	Q96QD8		0	809128	0.002	0.01862	2.05429	2	1129.59	-0.0430104	30.2664	0	C1203	33.33	B1503	0.1692
High	AAFNALVTF	6	1	1	Q9Y3T9		0	2.76445e+06	0.002	0.02268	2.03039	2	953.509	-0.127459	93.8783	0	C1203	81.48	C1203	0.0208
High	EVFYPGETVV	1	1	1	Q99720		0	0	0.002	0.01795	2.02207	2	1139.56	-0.342468	80.1692	0	C1203	42.86	A6802	0.0682
High	QQHDFTSQIF	2	3	3	Q04724;Q04726;Q04727		0	3.24257e+06	0.002	0.01657	2.0163	2	1250.58	0.0515151	67.6186	0	C1203	40	B1503	0.1474
High	GKAFNGKAY	2	1	1	Q3ZCT1		0	355208	0.002	0.02226	1.99267	2	955.499	-0.650235	29.3809	0	C1203	44.44	B1503	0.0941
High	YTIPPGHQV	31	1	1	Q16850		0	1.71685e+07	0.002	0.02208	1.97803	2	1011.53	0.15446	48.5816	0	C1203	77.78	A6802	0.0029
High	SAYANAKKY	1	1	1	O60524		0	255677	0.002	0.02115	1.95588	2	1015.52	-0.603764	26.038	0	C1203	81.48	C1203	0.0878
High	ETQKSIYYI	16	1	1	P08238		0	6.6305e+07	0.002	0.01797	1.95318	2	1144.59	-0.261173	60.4724	0	C1203	62.96	A6802	0.058
High	ETSPVLQKL	3	1	1	Q9NRR4		0	4.15824e+07	0.002	0.02176	1.94033	2	1014.58	-0.758288	57.3289	0	C1203	77.78	A6802	0.0343
High	QSFPEPLII	12	1	1	Q9NRL2		0	8.05278e+06	0.002	0.01901	1.92958	2	1043.58	-0.141182	96.019	0	C1203	77.78	C1203	0.351
High	DTTVIIWQV	11	1	1	Q9H7D7		0	1.11661e+07	0.002	0.01679	1.87465	2	1074.58	-0.545552	98.2929	0	C1203	70.37	A6802	0.1785
High	YKKELEKTY	1	1	1	P02545		0	325881	0.002	0.02196	1.80277	3	1201.65	0.172884	28.5307	0	C1203	51.85	B1503	0.0669
High	ETIFGEWTV	18	1	1	Q96MT1		0	4.79327e+07	0.002	0.0187	1.59545	2	1081.52	-0.144464	98.6754	0	C1203	70.37	A6802	0.0087
High	TASPLVKSV	20	1	1	Q6P4F7		0	6.81807e+06	0.003	0.0241	3.00155	2	901.535	-0.569764	46.8684	0	C1203	92.59	A6802	0.2616
High	MKFIDNTLY	1	1	1	Q14116		0	1.34589e+06	0.003	0.02603	2.89896	2	1144.57	-1.30165	72.5849	0	C1203	40.74	B1503	0.0414
High	ETISPSGQGV	1	1	1	P23610		0	0	0.003	0.02345	2.83094	2	974.479	0.155201	48.1969	0	C1203	51.43	A6802	0.0385
High	KASPLTFTV	20	1	1	P09884		0	1.35009e+07	0.003	0.02493	2.82828	2	963.551	0.0110572	67.7961	0	C1203	88.89	C1203	0.1183
High	GKYGSSLEF	12	1	1	P55212		0	5.45407e+06	0.003	0.02551	2.80526	2	987.478	-0.519068	57.6723	0	C1203	44.44	B1503	0.008
High	EGIDFYTSI	9	3	3	P34931;P08107;P11142		0	8.01919e+06	0.003	0.02566	2.74706	2	1044.49	-0.58472	88.5569	0	C1203	33.33	A6802	0.2987
High	TTVDHFWGL	5	1	1	O94901		0	2.66124e+06	0.003	0.02554	2.71888	2	1075.52	-0.304931	79.1746	0	C1203	70.37	A6802	0.013
High	GKYGFVIAV	6	1	1	P62487		0	1.55795e+06	0.003	0.02454	2.70388	2	953.545	-0.386684	76.2289	0	C1203	51.85	B1503	0.9572
High	GKLQKTVSY	10	1	1	P12757		0	1.2449e+06	0.003	0.02447	2.67902	2	1023.58	-0.408329	34.2598	0	C1203	40.74	B1503	0.0306
High	EVIRDVINV	19	1	1	Q6IEG0		0	2.00854e+07	0.003	0.02619	2.67816	2	1056.6	-1.20961	67.4002	0	C1203	44.44	A6802	0.0084
High	MKVPNVLTF	1	1	1	Q9H6R0		0	1.06284e+06	0.003	0.02558	2.63497	2	1048.59	-0.267352	82.1762	0	C1203	48.15	B1503	0.0065
High	AKRGELSKY	2	1	1	Q9ULC5		0	2.7355e+06	0.003	0.02376	2.62749	2	1051.59	-1.03158	39.8383	0	C1203	44.44	B1503	0.0653
High	ETTSISKITV	8	1	1	P51587		0	3.65079e+06	0.003	0.02469	2.57081	2	1078.6	-0.362404	55.749	0	C1203	40	A6802	0.1046
High	AQAESLRY	4	1	1	P23396		0	1.11898e+06	0.003	0.02679	2.54934	2	937.474	-0.194058	41.5097	0	C1203	26.67	B1503	0.1456
High	NTTDIFQTV	24	1	1	P37802		0	6.07768e+08	0.003	0.02603	2.51489	2	1038.51	-0.539375	77.2536	0	C1203	74.07	A6802	0.0045
High	GAYEQVIKY	19	1	1	P98194		0	2.37219e+07	0.003	0.02569	2.47731	2	1070.55	-0.938322	58.0342	0	C1203	88.89	C1203	0.0474
High	AAYPEIVAV	11	1	1	Q17RS7		0	5.43432e+06	0.003	0.02516	2.47552	2	932.508	-0.812964	78.3942	0	C1203	96.3	C1203	0.0061
High	TVSDVLNSV	5	1	1	Q14746		0	2.09349e+06	0.003	0.02575	2.4264	2	933.489	-0.0377135	71.1584	0	C1203	44.44	A6802	0.004
High	QLVDIIEKV	2	1	1	P61289		0	8.46055e+06	0.003	0.02578	2.4159	2	1056.63	-0.635266	77.9372	0	C1203	44.44	A6802	0.1489
High	EASFVLHTI	5	1	1	Q15418		0	1.8504e+06	0.003	0.02471	2.363	2	1016.54	-0.336648	71.0993	0	C1203	74.07	A6802	0.0607
High	HQFLQNEY	21	1	1	Q16531		0	1.48828e+07	0.003	0.02346	2.314	2	1078.49	-0.985704	52.1521	0	C1203	43.33	B1503	0.1513
High	RQVGATVEF	13	1	1	Q13432		0	4.49568e+06	0.003	0.02431	2.29742	2	1006.53	-0.79575	53.2496	0	C1203	40.74	B1503	0.0032
High	HAAHIISEL	12	1	1	Q96I24		0	6.83404e+06	0.003	0.02345	2.28335	2	990.536	-0.381393	49.2961	0	C1203	85.19	C1203	0.029
High	EIFADPRTV	12	1	1	Q92871		0	8.81085e+06	0.003	0.02661	2.27564	2	1047.54	-3.91108	60.6882	0	C1203	51.85	A6802	0.1054
High	ESIRFFVNV	12	1	1	Q8NBS3		0	5.14104e+06	0.003	0.02454	2.26763	2	1110.59	-0.536444	82.5853	0	C1203	70.37	A6802	0.0572
High	EVFLKAFAV	9	1	1	O95373		0	3.35863e+06	0.003	0.02644	2.25007	2	1023.59	-0.310251	82.5372	0	C1203	40.74	A6802	0.0388
High	EVAKMIQEV	7	1	1	Q9NRD5		0	2.95846e+06	0.003	0.02441	2.23769	2	1046.55	-0.835583	57.1482	0	C1203	48.15	A6802	0.0091
High	GQNAQTmAY	14	1	1	O75534	M7(Oxidation)	0	3.82834e+06	0.003	0.02383	2.22172	2	999.42	-0.514371	35.4897	0	C1203	37.04	B1503	0.0083
High	DIFGELFTQA	3	1	1	Q9Y6W5		0	437176	0.003	0.02379	2.2033	2	1140.56	-0.0392747	105.569	0	C1203	11.43	A6802	0.8955
High	AAASIANIV	8	1	1	P17987		0	5.11822e+06	0.003	0.02362	2.11863	2	829.478	-0.0862389	72.1725	0	C1203	85.19	A6802	0.4909
High	YTTTIEAFI	9	1	1	P07814		0	5.65171e+06	0.003	0.02543	2.11227	2	1058.54	-1.06473	91.103	0	C1203	62.96	A6802	0.075
High	KAFLNAIM	6	2	2	Q14839;Q8TDI0		0	3.23216e+06	0.003	0.02643	2.10589	2	907.507	-0.106587	72.0223	0	C1203	83.33	C1203	2.0118
High	LAAPVISVL	14	1	1	O60337		0	9.33721e+06	0.003	0.02503	2.02562	2	882.566	-0.0303294	92.9804	0	C1203	92.59	C1203	0.0085
High	ETFMNRVEV	6	1	1	Q9UBU8		0	2.47318e+06	0.003	0.0256	2.0168	2	1124.54	-0.938153	63.5159	0	C1203	77.78	A6802	0.0169
High	KQFGNILIL	11	1	1	P52788		0	1.04424e+07	0.003	0.02491	1.97352	2	1045.64	-0.293583	82.5409	0	C1203	51.85	B1503	0.0291
High	RQGTPLIAF	9	1	1	Q2NL82		0	2.26463e+07	0.003	0.02323	1.97155	2	1002.57	-0.278044	71.1714	0	C1203	33.33	B1503	0.0066
High	EVITWVDTI	1	1	1	P18084		0	735597	0.003	0.02643	1.96695	2	1075.57	-0.555476	94.3318	0	C1203	37.04	A6802	0.0613
High	HSAPFSWET	12	1	1	Q9H425		0	1.85827e+07	0.003	0.02628	1.92255	2	1061.47	-0.503127	62.249	0	C1203	44.44	A6802	0.7945
High	ETmNNIDRL	18	1	1	Q5T0N5	M3(Oxidation)	0	3.75272e+06	0.003	0.02619	1.89401	2	1121.53	-0.36755	46.6857	0	C1203	70.37	A6802	0.078
High	KKIEDNNTL	19	1	1	P62750		0	1.9164e+07	0.004	0.02703	3.27007	2	1074.58	-0.0989033	28.8203	0	C1203	44.44	B1503	0.2575
High	HTFFIGDHA	8	1	1	O15294		0	4.17521e+06	0.004	0.03757	3.10651	2	1044.49	-1.28329	52.4802	0	C1203	33.33	A6802	0.1073
High	NKADVILKY	2	2	2	P47813;O14602		0	1.62732e+06	0.004	0.02854	2.98299	2	1063.61	-2.17092	49.5068	0	C1203	51.85	B1503	0.0896
High	DATNILNKL	8	1	1	Q99832		0	3.0335e+06	0.004	0.03586	2.97324	2	1001.56	-0.32733	72.1653	0	C1203	74.07	A6802	0.7505
High	SVVELVNKL	2	1	1	Q9BQE5		0	4.71651e+06	0.004	0.02831	2.87347	2	1000.6	-0.512943	72.9699	0	C1203	44.44	A6802	0.0721
High	FANYIDKV	8	1	1	P08670		0	3.45788e+06	0.004	0.03599	2.8197	2	969.503	-0.782708	59.8584	0	C1203	83.33	A6802	5.2482
High	RAVALSLLLY	1	1	1	Q8IY34		0	2.49027e+06	0.004	0.03225	2.81144	2	1118.69	-0.952031	62.5075	0	C1203	60	B1503	3.2572
High	TVFSHAQTV	14	2	2	Q71UM5;P42677		0	1.43821e+07	0.004	0.03225	2.80973	2	989.505	-0.481114	45.2623	0	C1203	48.15	A6802	0.0314
High	AAATRTTSF	2	1	1	Q9H3F6		0	560350	0.004	0.03548	2.78847	2	925.473	-0.33928	34.356	0	C1203	74.07	C1203	0.0347
High	EVAQAGKAV	17	1	1	Q9UPN9		0	3.26538e+06	0.004	0.03652	2.7842	2	872.484	-0.106814	28.4616	0	C1203	44.44	A6802	0.1409
High	AKLPTGTTL	1	1	1	P54098		0	1.84219e+06	0.004	0.02792	2.78266	2	901.535	-0.705167	52.6438	0	C1203	51.85	B1503	0.0734
High	GKLGGQDSF	3	1	1	P14921		0	486039	0.004	0.03122	2.77477	2	908.447	-0.15541	41.7029	0	C1203	33.33	B1503	0.1897
High	GKRPGGSTF	9	1	1	O15399		0	3.88797e+06	0.004	0.02815	2.76223	2	906.479	-0.276708	25.0352	0	C1203	40.74	B1503	0.0145
High	LRNQLQSVY	8	1	1	Q9BSM1		0	6.03024e+06	0.004	0.02793	2.75312	2	1120.61	-0.283772	49.4346	0	C1203	40.74	B1503	0.1483
High	EILNIFQGV	3	1	1	Q9H0H0		0	594600	0.004	0.03584	2.72795	2	1032.57	-0.271309	100.312	0	C1203	37.04	A6802	0.0751
High	KQYKVVVY	3	1	1	P08754		0	2.26721e+06	0.004	0.03692	2.71995	2	1026.6	-0.661916	43.9953	0	C1203	30	B1503	0.018
High	SQmKSYQSF	4	1	1	Q12789	M3(Oxidation)	0	946836	0.004	0.03117	2.71909	2	1121.49	-0.874907	38.8631	0	C1203	29.63	B1503	0.0029
High	GKPVQGVAY	3	2	2	P0C0L4;P0C0L5		0	1.31237e+06	0.004	0.03306	2.70598	2	918.502	-2.0602	40.1464	0	C1203	40.74	B1503	0.4468
High	RQFTSSSSI	3	1	1	Q04695		0	1.18622e+06	0.004	0.03697	2.69196	2	1012.5	-1.07061	40.8072	0	C1203	33.33	B1503	0.0889
High	EVFPEFAAA	8	1	1	O15294		0	5.13725e+06	0.004	0.03604	2.68887	2	980.472	-0.593534	82.8413	0	C1203	11.11	A6802	0.0163
High	AmRLGAEVY	4	3	3	P09104;P06733;P13929	M2(Oxidation)	0	1.51928e+06	0.004	0.02983	2.67778	2	1025.51	-0.620377	47.5735	0	C1203	44.44	B1503	0.0456
High	AQSSLQEVY	4	1	1	P28066		0	3.13653e+06	0.004	0.02827	2.67559	2	1024.49	-0.750895	56.3159	0	C1203	51.85	B1503	0.0143
High	EVAGIINDA	17	1	1	Q14008		0	1.41261e+07	0.004	0.03049	2.65548	2	901.462	-0.35993	61.2759	0	C1203	11.11	A6802	0.0324
High	SAYQHPTTF	1	1	1	Q2KHR3		0	665077	0.004	0.03727	2.64691	2	1051.48	-0.628753	45.8606	0	C1203	77.78	C1203	0.0024
High	GKGSFGEVF	14	2	2	Q9P289;Q9Y6E0		0	1.07973e+07	0.004	0.03025	2.6431	2	927.457	-0.495654	60.1966	0	C1203	37.04	B1503	0.253
High	AKQRLQQLF	3	1	1	Q9P0U1		0	2.35389e+06	0.004	0.03782	2.63443	2	1131.66	-0.516032	52.2244	0	C1203	33.33	B1503	0.2919
High	ITADVNHNL	14	1	1	Q16222		0	4.98206e+06	0.004	0.02938	2.63358	2	996.51	-0.866961	46.6297	0	C1203	74.07	A6802	0.0184
High	SAAPLPLYT	7	1	1	P56524		0	2.64898e+06	0.004	0.03613	2.6149	2	932.508	-0.409524	74.5242	0	C1203	55.56	A6802	1.4782
High	KTASINQNV	11	1	1	Q8NI77		0	5.68134e+06	0.004	0.02911	2.58037	2	974.526	-0.536389	32.9097	0	C1203	74.07	A6802	0.1703
High	GKGGFGTVF	2	2	2	Q9P1W9;Q9Y572		0	2.5938e+06	0.004	0.03218	2.5749	2	869.452	-0.122664	61.0668	0	C1203	37.04	B1503	0.0703
High	KQLEDGRTL	5	4	4	P62987;P62979;P0CG47;P0CG48		0	1.38149e+06	0.004	0.03084	2.5592	2	1059.58	-0.190773	32.9061	0	C1203	48.15	B1503	0.0435
High	SKFGTGNKY	3	1	1	P14735		0	1.01553e+06	0.004	0.02931	2.54272	2	1001.5	-0.536293	29.1658	0	C1203	44.44	B1503	0.014
High	MTKEISSV	6	1	1	P78527		0	1.7375e+06	0.004	0.03331	2.54104	2	894.46	-0.35314	38.7939	0	C1203	73.33	A6802	2.8559
High	GKSGVAITF	6	1	1	Q9BUQ8		0	3.34738e+06	0.004	0.03053	2.53887	2	879.493	-0.10976	59.1473	0	C1203	44.44	B1503	0.0385
High	NSYPHQLYT	3	1	1	Q8IZD2		0	1.64648e+06	0.004	0.02769	2.52771	2	1122.52	-0.145625	47.8212	0	C1203	44.44	A6802	1.1212
High	AQMAQILSF	1	1	1	P35237		0	605468	0.004	0.03326	2.51403	2	1008.52	-0.457538	90.0178	0	C1203	40.74	B1503	0.0036
High	GQVQKIVLY	7	1	1	Q00610		0	5.59548e+06	0.004	0.03484	2.51229	2	1047.62	-1.46011	60.5564	0	C1203	44.44	B1503	0.0174
High	SKTQVTVQY	8	2	2	Q00266;P31153		0	1.40651e+06	0.004	0.03302	2.50411	2	1053.56	-0.674862	43.3643	0	C1203	40.74	B1503	0.0568
High	SQYPGAKY	1	1	1	P24928		0	1.34362e+06	0.004	0.03454	2.48781	2	913.441	-0.0311858	37.3867	0	C1203	30	B1503	0.0147
High	SAAEEVKTY	1	1	1	Q5JRA6		0	1.25119e+06	0.004	0.03283	2.48445	2	997.483	-0.623043	36.9314	0	C1203	92.59	C1203	0.1392
High	TLAEIYVAA	4	1	1	P36956		0	2.82055e+06	0.004	0.02805	2.47307	2	950.519	-0.284826	75.4558	0	C1203	11.11	A6802	0.2268
High	EAVDLITRL	9	1	1	Q9P0M9		0	3.16327e+06	0.004	0.03605	2.46205	2	1029.59	-0.376694	75.681	0	C1203	81.48	A6802	0.06
High	LAKVTAEV	1	1	1	P04843		0	1.00954e+06	0.004	0.03442	2.45683	2	830.498	-0.103301	44.7736	0	C1203	86.67	C1203	7.1316
High	YAVDRAITH	4	1	1	P14866		0	751318	0.004	0.03056	2.45156	2	1045.54	-0.489233	38.7725	0	C1203	51.85	C1203	0.5525
High	LHGPSGSAF	3	1	1	P26006		0	1.31257e+06	0.004	0.02822	2.45143	2	872.426	-0.276718	45.4386	0	C1203	37.04	B1503	0.3147
High	KQFKSEAY	3	1	1	Q03001		0	871840	0.004	0.03134	2.44154	2	1000.51	-0.221069	28.4204	0	C1203	33.33	B1503	0.0268
High	QTHSVFVNV	10	1	1	Q9Y3A5		0	2.12595e+07	0.004	0.03045	2.43846	2	1030.53	-0.698584	57.2395	0	C1203	74.07	A6802	0.0267
High	GmYGKIAVm	3	1	1	Q16531	M2(Oxidation); M9(Oxidation)	0	687154	0.004	0.03365	2.43364	2	1001.48	-0.276281	44.7287	0	C1203	44.44	B1503	0.2677
High	VAHSPPSTL	8	1	1	Q03252		0	4.58223e+06	0.004	0.0335	2.42495	2	908.483	-0.349301	39.8315	0	C1203	88.89	C1203	0.016
High	DVAQIIIRI	18	1	1	Q7L622		0	1.70187e+07	0.004	0.03591	2.40674	2	1040.65	-0.609063	87.7008	0	C1203	40.74	A6802	0.0471
High	RQLPAMTAL	3	1	1	Q13045		0	3.11611e+06	0.004	0.02932	2.40232	2	1000.56	-0.154669	62.7283	0	C1203	44.44	B1503	0.0154
High	KAFGSTIVI	3	1	1	Q13620		0	3.08931e+06	0.004	0.02861	2.37614	2	935.556	-0.275311	67.1364	0	C1203	81.48	C1203	0.0218
High	TAVTVNQSL	3	1	1	P05787		0	1.45941e+06	0.004	0.03123	2.3706	2	932.504	-0.680261	55.6204	0	C1203	74.07	C1203	0.3481
High	DVARISWYL	11	1	1	Q13011		0	2.7898e+06	0.004	0.03755	2.36835	2	1122.59	-0.739281	87.3369	0	C1203	40.74	A6802	0.0394
High	FKIEPPGLF	3	2	2	Q969P6;P11387		0	2.27829e+06	0.004	0.02841	2.36148	2	1047.59	-1.23535	85.1953	0	C1203	40.74	B1503	0.0502
High	ATSSVFQEV	2	1	1	Q9BTE0		0	3.91454e+06	0.004	0.02906	2.34893	2	967.473	-0.262897	67.0384	0	C1203	81.48	A6802	0.0874
High	ESSQVLYKL	1	1	1	Q6YHU6		0	1.50304e+06	0.004	0.0318	2.33367	2	1066.58	-1.14717	60.8225	0	C1203	70.37	A6802	0.2888
High	STASILASV	1	1	1	O60716		0	2.46048e+06	0.004	0.0275	2.32809	2	848.472	-0.158753	74.1338	0	C1203	74.07	A6802	0.0035
High	GQFPGHNEF	24	1	1	Q9UKI2		0	1.60791e+07	0.004	0.03696	2.32351	2	1032.45	-1.17707	52.026	0	C1203	44.44	B1503	0.0015
High	VKSQISVY	1	1	1	Q9H8H0		0	773022	0.004	0.0371	2.30684	2	923.519	-0.309205	46.3211	0	C1203	40	B1503	0.6481
High	ESYHVPELI	9	1	1	P42704		0	7.75533e+06	0.004	0.029	2.29802	2	1086.55	-0.743028	73.6571	0	C1203	66.67	A6802	0.1025
High	EVYVGDERV	8	1	1	O14976		0	3.40697e+06	0.004	0.02815	2.29682	2	1065.52	-2.05797	49.7327	0	C1203	40.74	A6802	0.042
High	SQLPKLLVY	2	1	1	P11117		0	2.26829e+06	0.004	0.03081	2.29092	2	1060.64	-0.880172	77.2411	0	C1203	51.85	B1503	0.0043
High	AVIGDVIRV	1	1	1	Q9NR30		0	1.00814e+06	0.004	0.03716	2.28975	2	941.578	-0.230446	72.021	0	C1203	51.85	A6802	0.0594
High	ALWIGTTSF	5	1	1	Q9NS69		0	871016	0.004	0.03559	2.28961	2	995.519	-0.429552	94.1869	0	C1203	33.33	B1503	0.0363
High	ESFFLGETL	6	1	1	Q9UKM7		0	1.98801e+06	0.004	0.03494	2.28795	2	1042.51	-0.701049	95.3773	0	C1203	74.07	A6802	0.2242
High	EIKDQPQNV	5	1	1	O14879		0	1236731	0.004	0.03568	2.28067	2	1070.55	-1.07881	35.2986	0	C1203	44.44	A6802	0.6185
High	AAKDPSPSV	5	1	1	O75153		0	668006	0.004	0.03209	2.27586	2	871.452	-0.00960376	30.563	0	C1203	81.48	C1203	0.2231
High	TTVRVTNSNA	7	3	3	Q15155;Q5JPE7;P69849		0	507551	0.004	0.03725	2.26456	2	1062.55	-1.00637	29.8626	0	C1203	20	A6802	1.6273
High	ESFIKAIGV	6	1	1	Q9NRN7		0	2.79582e+06	0.004	0.0298	2.23516	2	963.551	-0.316041	73.168	0	C1203	74.07	A6802	0.0612
High	FAFFDPVmY	5	1	1	O95071	M8(Oxidation)	0	300877	0.004	0.02837	2.23259	2	1152.51	0.133142	101.619	0	C1203	88.89	C1203	0.0372
High	ETVELQISL	1	1	1	P62906		0	1.81976e+06	0.004	0.03715	2.19646	2	1031.56	-0.378323	88.3682	0	C1203	74.07	A6802	0.0153
High	RQYEQQTY	4	1	1	Q9Y262		0	561618	0.004	0.03486	2.19576	2	1115.51	-0.526551	32.657	0	C1203	26.67	B1503	0.0071
High	RQLPSSHAL	4	1	1	Q8WV83		0	4.73026e+06	0.004	0.02744	2.19024	2	1008.56	-0.687525	36.5889	0	C1203	44.44	B1503	0.015
High	SASRVVQVV	5	1	1	P82909		0	2.63714e+06	0.004	0.03356	2.18892	2	944.552	-0.307779	45.9148	0	C1203	85.19	C1203	0.5875
High	FVFPGELLL	4	1	1	Q15758		0	1.1539e+07	0.004	0.03644	2.18548	2	1034.59	-0.414556	107.859	0	C1203	55.56	C1203	0.0124
High	SAFATPFLV	21	1	1	P15954		0	4.09235e+07	0.004	0.03544	2.18392	2	952.513	-0.436704	97.7048	0	C1203	81.48	A6802	0.086
High	SALEHVVEF	6	1	1	O75581		0	6.40038e+06	0.004	0.03363	2.18373	2	1030.52	-0.353385	69.3496	0	C1203	81.48	C1203	0.0225
High	EVSNTFVRL	12	1	1	Q9BUI4		0	1.45211e+07	0.004	0.03454	2.18339	2	1064.57	-1.25886	65.8958	0	C1203	44.44	A6802	0.0389
High	STVEVIFHV	14	2	2	Q6GYQ0;Q2PPJ7		0	3.4313e+06	0.004	0.0318	2.16524	2	1030.56	-0.830133	77.2176	0	C1203	74.07	A6802	0.0036
High	YASYVYLSM	1	2	2	P02794;Q8N4E7		0	858385	0.004	0.03489	2.15449	2	1096.5	-0.418474	84.957	0	C1203	77.78	C1203	0.0939
High	YSYFSPRTm	1	1	1	Q15003	M9(Oxidation)	0	872725	0.004	0.03225	2.14843	2	1167.51	-0.403393	53.4009	0	C1203	77.78	C1203	0.0041
High	YAFLHRTL	6	2	2	Q9UH17;Q8IUX4		0	5.61179e+06	0.004	0.02792	2.14611	2	1020.56	-1.13993	56.4713	0	C1203	90	C1203	0.2862
High	YVASNQHEV	5	1	1	Q13127		0	841764	0.004	0.03716	2.14038	2	1046.49	-0.360832	32.1075	0	C1203	51.85	A6802	0.0175
High	DTFSGQFVL	14	1	1	Q5T089		0	7.25814e+06	0.004	0.03276	2.1074	2	1013.49	-0.299388	91.0016	0	C1203	77.78	A6802	0.0629
High	EASYLITSV	15	1	1	O60488		0	3.89145e+07	0.004	0.03039	2.08415	2	982.509	-0.53714	76.3365	0	C1203	81.48	A6802	0.0329
High	ESAGLGYRV	8	1	1	Q63HN8		0	6.48789e+06	0.004	0.03547	2.0814	2	951.487	-2.21654	49.7861	0	C1203	74.07	A6802	0.0202
High	VAFPKSLVA	22	1	1	Q8IWI9		0	1.91974e+07	0.004	0.03305	2.04373	2	931.561	-0.433381	67.515	0	C1203	59.26	C1203	0.1419
High	VKAEIRQQF	5	1	1	P30154		0	1.86749e+06	0.004	0.0326	2.00905	2	1118.63	-0.727967	41.6959	0	C1203	40.74	B1503	0.0242
High	RTFPWIIEV	3	1	1	P28749		0	2.24336e+06	0.004	0.03735	2.00338	2	1160.65	-0.230568	94.5376	0	C1203	88.89	C1203	0.0297
High	DVIYPmAVV	4	1	1	P78406	M6(Oxidation)	0	3.25371e+06	0.004	0.03157	1.98986	2	1022.52	0.00623641	83.8509	0	C1203	40.74	A6802	0.0294
High	GKSDPFLVF	4	3	3	Q9HCH3;Q86YQ8;Q8IYJ1		0	3.49795e+06	0.004	0.02876	1.97911	2	1009.53	-0.881469	82.956	0	C1203	44.44	B1503	0.0196
High	SQVPRSSSm	7	1	1	Q9H992	M9(Oxidation)	0	785567	0.004	0.03739	1.95925	2	994.462	-0.24496	23.9332	0	C1203	37.04	B1503	0.0134
High	HAFWGGSVV	7	1	1	O75179		0	4.64654e+07	0.004	0.03564	1.91121	2	959.474	0.206442	68.4276	0	C1203	81.48	C1203	0.0458
High	TVADFFIKA	3	1	1	Q709C8		0	2.91016e+06	0.004	0.03512	1.8636	2	1011.55	0.362676	77.6904	0	C1203	11.11	A6802	0.0196
High	KKIYLQDEF	1	1	1	Q8WU10		0	820460	0.004	0.03098	1.85373	2	1183.63	-0.929465	54.9091	0	C1203	33.33	B1503	0.277
High	EVTKLQQQV	3	1	1	Q9NVF7		0	586845	0.004	0.03262	1.81448	2	1072.6	-0.647658	42.4758	0	C1203	37.04	A6802	0.2264
High	SAFPEVRSL	5	1	1	Q6YHU6		0	3.34359e+06	0.004	0.03502	1.77943	2	1005.54	1.33861	65.3671	0	C1203	92.59	C1203	0.0047
High	FAADIISVL	3	1	1	Q13200		0	1.75472e+07	0.004	0.0359	1.76532	2	948.54	-0.219015	100.473	0	C1203	92.59	C1203	0.0035
High	MVAPVWYLV	6	1	1	Q96HY6		0	1.53587e+06	0.004	0.02746	1.74993	2	1077.58	-0.749827	107.206	0	C1203	48.15	A6802	0.012
High	FAWPKILKI	1	2	2	Q9H4G0;O43491		0	1.76463e+06	0.004	0.03188	1.68472	2	1115.7	-0.823188	85.6325	0	C1203	85.19	C1203	0.033
High	DVFHMVVEV	12	1	1	Q15181		0	2.2175e+07	0.004	0.0378	1.53242	2	1074.53	-0.837205	89.287	0	C1203	51.85	A6802	0.043
High	EVIAEAVGV	5	1	1	O15226		0	2.0439e+06	0.005	0.04018	2.93309	2	886.488	-0.202707	69.4087	0	C1203	40.74	A6802	0.0058
High	QSVHFQTIF	2	1	1	P54136		0	2.08592e+06	0.005	0.04036	2.78963	2	1106.56	-0.364825	73.724	0	C1203	59.26	C1203	1.2338
High	KASEWVQQV	5	1	1	P49588		0	3.43248e+06	0.005	0.04101	2.72942	2	1074.56	-1.7919	52.1734	0	C1203	85.19	C1203	0.2269
High	SVSAVIVRA	11	1	1	Q68CR1		0	4.24499e+06	0.005	0.03883	2.69945	2	901.546	-1.18963	51.5134	0	C1203	11.11	A6802	0.1134
High	VSYKGSISY	6	1	1	Q6SPF0		0	1.70772e+06	0.005	0.04523	2.69341	2	1003.51	-1.93957	49.919	0	C1203	77.78	C1203	0.0184
High	EVFGHAIKA	16	1	1	P54136		0	1.4806e+07	0.005	0.04304	2.69222	2	971.529	-1.89492	45.0057	0	C1203	11.11	A6802	0.0322
High	PQRATSNVF	11	3	3	P19105;O14950;P24844		0	7.44852e+06	0.005	0.0442	2.69042	2	1019.53	-0.786335	41.5115	0	C1203	33.33	B1503	0.2068
High	KAFPKAYLL	9	1	1	Q66K89		0	5.43612e+06	0.005	0.04121	2.6758	2	1050.63	-1.25916	60.7705	0	C1203	85.19	C1203	0.0085
High	SAFDHFASV	13	1	1	Q9Y547		0	8.63117e+06	0.005	0.04288	2.67475	2	980.447	0.239716	65.4809	0	C1203	81.48	C1203	0.0055
High	FAYEGPmYL	2	1	1	Q96MT1	M7(Oxidation)	0	1.71012e+06	0.005	0.04236	2.56503	2	1106.49	-0.414698	80.2071	0	C1203	88.89	C1203	0.0008
High	GVVDIFQTV	23	2	2	P23468;Q13332		0	3.14486e+07	0.005	0.04615	2.56308	2	977.53	-0.0115586	92.9532	0	C1203	44.44	A6802	0.0738
High	QKLPVANEY	1	1	1	Q8IYB1		0	1.52857e+06	0.005	0.04315	2.53934	2	1061.56	-1.56431	50.084	0	C1203	48.15	B1503	0.0656
High	TTVELANKV	6	1	1	O75533		0	1.81465e+07	0.005	0.04063	2.48542	2	974.553	1.266	48.8035	0	C1203	70.37	A6802	0.0153
High	QVADIDGQYA	2	1	1	P35222		0	1.60099e+06	0.005	0.04425	2.47744	2	1079.5	-1.02466	55.3739	0	C1203	11.43	A6802	0.5722
High	LSKDGVLYV	11	1	1	Q9H1A4		0	1.02501e+07	0.005	0.04519	2.47078	2	993.561	-0.543077	61.5578	0	C1203	77.78	C1203	0.3348
High	EISSILKEL	6	1	1	Q9Y4F5		0	3.65965e+06	0.005	0.04326	2.44956	2	1031.6	-0.509289	81.4704	0	C1203	51.85	A6802	0.2228
High	LTPSHIKAY	1	1	1	P50613		0	2.37468e+06	0.005	0.04571	2.43945	2	1029.57	-0.573196	39.6485	0	C1203	77.78	C1203	0.6321
High	TSYPDPILL	12	1	1	P50591		0	5.67111e+06	0.005	0.04485	2.41348	2	1018.55	-0.411097	89.5884	0	C1203	85.19	C1203	0.0431
High	KQADPFASL	10	1	1	Q5SR56		0	5.83529e+06	0.005	0.04207	2.41091	2	976.51	-0.309487	64.7972	0	C1203	44.44	B1503	0.0148
High	ELAEIVFKV	4	1	1	Q9Y2R5		0	1.85865e+06	0.005	0.04472	2.4108	2	1047.61	-0.197912	83.1637	0	C1203	48.15	A6802	0.0159
High	RQLTLGAY	5	1	1	O95619		0	1.12247e+06	0.005	0.04049	2.40408	2	921.514	-0.955427	55.2862	0	C1203	26.67	B1503	0.1321
High	YGFPSPIFL	2	1	1	Q76EJ3		0	1.43136e+06	0.005	0.03951	2.37834	2	1040.54	-0.203572	106.059	0	C1203	59.26	C1203	0.0228
High	AKGPGLFF	8	2	2	Q9NP85;P27105		0	1.22544e+07	0.005	0.04512	2.37473	2	836.466	-0.160284	72.4708	0	C1203	33.33	B1503	1.9107
High	DAANVLLQL	5	1	1	Q7Z6Z7		0	2.11193e+06	0.005	0.04158	2.35514	2	956.54	-1.07011	95.0322	0	C1203	81.48	A6802	0.2502
High	GQSRLIFTY	2	1	1	Q96Q89		0	2.65704e+06	0.005	0.04214	2.33167	2	1084.58	-0.507821	68.4051	0	C1203	48.15	B1503	0.0742
High	HQIKSLQY	13	1	1	Q9NW82		0	6.38358e+06	0.005	0.04501	2.28033	2	1016.55	-0.376551	38.8853	0	C1203	26.67	B1503	0.0968
High	DLmAPQPGV	5	1	1	Q96B49	M3(Oxidation)	0	2.77064e+06	0.005	0.04299	2.27358	2	943.455	-0.0386193	61.9607	0	C1203	37.04	A6802	0.2434
High	GKLPRSPSF	1	1	1	Q9P0N9		0	1.7821e+06	0.005	0.04433	2.26733	2	988.557	-0.812372	45.3323	0	C1203	37.04	B1503	0.0307
High	EAWGSGVEVLV	1	1	1	P03923		0	1.27498e+06	0.005	0.04305	2.26655	2	1145.58	-0.527084	90.2083	0		0	A6802	1.428
High	GKAFSRISY	1	2	2	Q8WV37;Q3KP31		0	1.8904e+06	0.005	0.04158	2.2623	2	1028.55	-0.688307	44.1877	0	C1203	44.44	B1503	0.0537
High	YVNLPTIAL	1	1	1	P08865		0	1.01054e+06	0.005	0.04559	2.24457	2	1003.58	-0.394145	95.2783	0	C1203	44.44	C1203	0.0265
High	GQFQKIVLY	5	1	1	P53675		0	2.65504e+06	0.005	0.03996	2.23717	2	1095.62	-0.504807	69.0765	0	C1203	48.15	B1503	0.0079
High	ETIDLLVQI	4	1	1	Q9Y6X9		0	4.74339e+06	0.005	0.04267	2.23513	2	1043.6	-0.15252	99.9211	0	C1203	66.67	A6802	0.004
High	KAmIPLLQI	1	1	1	O00555	M3(Oxidation)	0	0	0.005	0.04038	2.18795	2	1042.63	-0.462687	92.9737	0	C1203	70.37	C1203	0.3481
High	AAFQEEFTV	1	1	1	P51116		0	2.10004e+06	0.005	0.04026	2.18563	2	1041.49	0.0151994	78.609	0	C1203	85.19	C1203	0.6043
High	EVDPNIQAV	7	1	1	P05787		0	3.59179e+06	0.005	0.04121	2.151	2	984.499	-0.330206	60.4911	0	C1203	48.15	A6802	0.031
High	QQQQPQHAF	3	1	1	Q99967		0	913501	0.005	0.04037	2.13758	2	1111.53	-0.402942	34.7268	0	C1203	29.63	B1503	0.0137
High	FSYGRALQA	1	3	3	P04075;P05062;P09972		0	716923	0.005	0.04093	2.12455	2	1012.52	-1.01151	54.5991	0	C1203	44.44	C1203	0.1662
High	GQRVISmY	1	1	1	Q92616	M7(Oxidation)	0	604858	0.005	0.04375	2.1146	2	969.482	-0.105213	43.3543	0	C1203	36.67	B1503	0.4949
High	HAAELIKTV	4	1	1	Q8WUM4		0	1.70482e+06	0.005	0.0448	2.1114	2	981.572	-0.621601	43.7724	0	C1203	92.59	A6802	0.0764
High	EVTEFFVTL	6	1	1	Q5T4S7		0	2.01581e+06	0.005	0.04139	2.06285	2	1084.56	-0.0677031	101.506	0	C1203	48.15	A6802	0.0182
High	DIFSDLYYV	3	1	1	Q2TAL8		0	910597	0.005	0.04432	2.00603	2	1134.54	-0.165223	107.739	0	C1203	44.44	A6802	0.0183
High	DSFPYEFFQV	3	1	1	Q04864		0	550669	0.005	0.04364	1.92497	2	1278.57	0.0198051	107.824	0	C1203	57.14	A6802	0.6349
High	RQSVAGTY	6	1	1	Q9BX59		0	909548	0.005	0.04103	1.88711	2	881.448	0.180578	31.5865	0	C1203	30	B1503	0.066
High	QQNPQPLIF	2	1	1	O00170		0	7.13098e+06	0.005	0.03966	1.88084	2	1084.58	-0.291939	80.1414	0	C1203	44.44	B1503	0.0054
High	HTAEITHEI	7	1	1	Q00597		0	2.6834e+06	0.005	0.04019	1.83901	2	1050.52	-0.532762	38.4186	0	C1203	70.37	A6802	0.0021
High	ETQHIADQV	2	1	1	P04080		0	9.69884e+06	0.005	0.04144	1.77945	2	1040.5	-0.0897161	38.0059	0	C1203	66.67	A6802	0.0769
High	GKmNPQSAF	2	1	1	P22307	M3(Oxidation)	0	604033	0.006	0.05054	2.74785	2	995.461	-0.134566	35.7429	0	C1203	29.63	B1503	0.0163
High	KQYLSYETL	1	1	1	O95084		0	1.10385e+06	0.006	0.04927	2.47223	2	1144.59	-0.581123	62.9148	0	C1203	44.44	B1503	0.1511
High	ELANLYHHV	6	1	1	Q8TD16		0	3.1484e+06	0.006	0.04896	2.46712	2	1095.56	-0.369167	49.3168	0	C1203	40.74	A6802	0.0562
High	AKVKATTSL	6	1	1	A9YTQ3		0	1.18448e+06	0.006	0.05063	2.45545	2	918.562	-0.359544	29.4914	0	C1203	40.74	B1503	0.1105
High	GKRIGVFSY	19	1	1	Q01581		0	2.13243e+07	0.006	0.04901	2.4051	2	1026.57	-0.67799	55.7994	0	C1203	40.74	B1503	0.081
High	AAIEWIIEH	1	1	1	Q96N28		0	1.12385e+06	0.006	0.04738	2.40332	2	1081.57	-1.96192	78.4341	0	C1203	55.56	C1203	2.0231
High	HQFLSEQF	9	1	1	Q8TDB6		0	1.00462e+07	0.006	0.04803	2.3734	2	1035.49	-1.67342	63.8301	0	C1203	36.67	B1503	0.2817
High	SVQAPSYGA	5	1	1	P05783		0	652849	0.006	0.04762	2.33853	2	879.421	-0.13813	46.0624	0	C1203	0	A6802	0.6104
High	QASPFVLRA	8	1	1	Q9BUE0		0	0	0.006	0.04887	2.33822	2	988.557	-0.318439	62.4423	0	C1203	55.56	A6802	0.7658
High	EVSRVLEQV	7	1	1	Q96R06		0	5.50641e+06	0.006	0.04924	2.32285	2	1058.58	-0.988008	55.2702	0	C1203	40.74	A6802	0.0149
High	ELFAVIAHV	4	2	2	Q9UMW8;Q3LFD5		0	954667	0.006	0.04848	2.2997	2	998.566	-0.599346	83.6354	0	C1203	44.44	A6802	0.0623
High	TVTDVVRFI	1	1	1	Q5VUG0		0	1.67038e+06	0.006	0.04754	2.276	2	1049.6	-0.557384	79.3276	0	C1203	40.74	A6802	0.0588
High	GKREGIDQSY	2	1	1	O94952		0	798442	0.006	0.04966	2.2712	2	1152.56	-0.354737	30.7873	0	C1203	40	B1503	0.245
High	VQRQGVSY	3	1	1	Q8IVT2		0	681074	0.006	0.0501	2.22297	2	936.489	-0.442988	33.2051	0	C1203	30	B1503	0.051
High	DTKAILEQI	4	1	1	Q6ZRV2		0	3.82623e+06	0.006	0.04817	2.22104	2	1030.58	-0.614407	71.3296	0	C1203	59.26	A6802	0.2102
High	TVVEIILQA	1	1	1	P38935		0	1.83458e+06	0.006	0.04778	2.19336	2	985.593	-0.112926	91.6046	0	C1203	11.11	A6802	0.0406
High	KANPGAWIL	6	2	2	Q9NYU2;Q9NYU1		0	1.04584e+07	0.006	0.04802	2.17649	2	969.551	-0.627415	70.9603	0	C1203	81.48	C1203	0.1562
High	STYPAPFYV	8	1	1	P15923		0	2.4933e+06	0.006	0.04685	2.13416	2	1044.5	-0.566723	84.9248	0	C1203	81.48	A6802	0.0045
High	GLASLEQLY	1	1	1	Q92626		0	1.64969e+06	0.006	0.05029	2.10283	2	993.525	-0.407099	44.6691	0	C1203	44.44	B1503	1.1196
High	EQRSGDITY	1	1	1	P19174		0	890057	0.006	0.04941	2.08223	2	1068.5	-0.35044	38.6364	0	C1203	48.15	B1503	0.0354
High	EVYPGQQYL	2	1	1	Q8NF64		0	1.44085e+07	0.006	0.05073	2.05292	2	1096.53	-0.481695	73.0512	0	C1203	48.15	A6802	0.0118
High	AATPAVRTV	11	2	2	P11940;Q9H361		0	1.33747e+07	0.006	0.05066	2.03413	2	885.515	0.0859646	39.4633	0	C1203	96.3	C1203	0.1137
High	SQATPHSSY	7	1	1	Q49A88		0	430809	0.006	0.04801	2.009	2	977.432	-0.387685	27.2431	0	C1203	40.74	B1503	0.0024
High	GKVQENSAY	2	1	1	Q9Y3T9		0	551158	0.006	0.04862	2.00256	2	995.479	-0.230839	27.3027	0	C1203	37.04	B1503	0.0726
High	GKAFRSSNY	1	1	1	Q8N8Z8		0	417029	0.006	0.04688	1.99113	2	1029.51	0.263142	29.265	0	C1203	40.74	B1503	0.341
High	ESFDGSVRA	4	1	1	P19338		0	3.68266e+06	0.006	0.04873	1.89983	2	967.447	-0.64814	42.4608	0	C1203	40.74	A6802	0.06
High	NQYPSEQRF	2	1	1	P41161		0	537905	0.006	0.04911	1.83366	2	1168.54	-0.153897	44.8246	0	C1203	40.74	B1503	0.0085
High	ETANQEYKV	2	1	1	Q8WX93		0	1.29516e+06	0.006	0.05045	1.731	2	1081.52	-0.133665	37.1957	0	C1203	70.37	A6802	0.035
High	STIDILYQL	3	1	1	Q9NR09		0	1.48549e+06	0.006	0.04664	1.70795	2	1065.58	-0.221701	98.3464	0	C1203	70.37	A6802	0.0041
High	IKHSGNITF	3	1	1	P30050		0	2.15122e+06	0.007	0.05163	2.99787	2	1016.55	-1.71714	41.1533	0	C1203	40.74	B1503	0.007
High	FANGHVNSV	4	1	1	Q9NRL2		0	1.67929e+06	0.007	0.05738	2.99244	2	944.459	0.0554736	37.9656	0	C1203	85.19	C1203	0.0128
High	GKVFSQNAY	1	1	1	O14709		0	4.94635e+06	0.007	0.0517	2.70017	2	1013.51	1.63804	44.0815	0	C1203	37.04	B1503	0.125
High	RSLQENIAY	5	1	1	Q03518		0	3.6944e+06	0.007	0.05628	2.69891	2	1093.56	-1.14833	51.3303	0	C1203	70.37	B1503	0.1512
High	GKFTEGNITY	1	1	1	Q7Z2W4		0	1.19721e+06	0.007	0.05857	2.65453	2	1129.55	-1.3283	54.474	0	C1203	37.14	B1503	0.0356
High	AHYNLQNAF	3	2	2	Q01082;O15020		0	1.62782e+06	0.007	0.05708	2.63807	2	1077.51	-0.758902	59.7865	0	C1203	37.04	B1503	0.0608
High	GKPGHLQFY	6	1	1	Q8IWA0		0	1.69912e+06	0.007	0.054	2.62967	2	1046.54	-0.374438	47.4185	0	C1203	40.74	B1503	0.7703
High	FAGPHSTL	4	1	1	Q9Y5X2		0	1.17266e+06	0.007	0.05252	2.57784	2	829.42	-0.0441881	45.0764	0	C1203	90	C1203	1.0372
High	TKQGWSSAY	2	2	2	Q7Z7E8;Q8WVN8		0	1.21493e+06	0.007	0.05227	2.56613	2	1027.48	-1.2472	43.667	0	C1203	40.74	B1503	0.1445
High	EATDVKSTL	3	1	1	Q9NZM1		0	2.61602e+06	0.007	0.05131	2.48934	2	963.499	-0.491302	39.7976	0	C1203	81.48	A6802	0.3015
High	RKVPGVTAI	4	3	3	Q06787;P51114;P51116		0	5.02466e+06	0.007	0.0582	2.44813	2	940.594	-0.283658	43.4544	0	C1203	40.74	B1503	0.0813
High	HAFDGRPSVA	6	1	1	Q17R31		0	1.98397e+06	0.007	0.05751	2.42781	2	1056.52	-0.258504	37.8906	0	C1203	60	A6802	1.5652
High	GKGNFGEVY	6	1	1	P16591		0	3.59077e+06	0.007	0.05745	2.4252	2	970.462	-0.538293	47.3761	0	C1203	40.74	B1503	0.2403
High	KAFSVVIQA	4	1	1	Q16533		0	2.08454e+06	0.007	0.0514	2.37563	2	962.567	-0.114491	62.8657	0	C1203	51.85	C1203	0.7659
High	TTAEVVVTEI	4	1	1	P10809		0	1.67997e+06	0.007	0.05578	2.36883	2	1061.57	-0.435408	74.4171	0	C1203	28.57	A6802	0.0673
High	TVSEVIQGLL	1	1	1	Q8WWW0		0	6.26823e+06	0.007	0.0555	2.35124	2	1058.61	-0.530057	95.4732	0	C1203	28.57	A6802	0.3253
High	GQKENVVVY	4	1	1	Q2NKX8		0	1.2241e+06	0.007	0.05391	2.33436	2	1035.55	-0.75431	44.5607	0	C1203	51.85	B1503	0.0059
High	SASKIIVFV	11	1	1	O15439		0	5.13603e+06	0.007	0.05959	2.27428	2	963.587	-0.0658247	73.1736	0	C1203	85.19	A6802	0.0512
High	IKKDVDEAY	3	1	1	P05787		0	713186	0.007	0.0525	2.2483	2	1080.56	-0.71002	32.2274	0	C1203	40.74	B1503	0.1024
High	FTITPPTAQVV	1	1	1	P52907		0	757119	0.007	0.05325	2.23617	2	1173.65	-0.655166	83.8716	0		0	A6802	0.828
High	TAAPPAQPL	3	1	1	P25440		0	2.783e+06	0.007	0.05192	2.22389	2	865.478	-0.36474	51.6852	0	C1203	85.19	C1203	0.1455
High	STSAVNHNV	6	1	1	Q07157		0	2.63983e+06	0.007	0.05272	2.21945	2	928.448	-0.286127	25.9252	0	C1203	70.37	A6802	0.0123
High	SKTGGYLVY	8	1	1	P46087		0	4.48002e+06	0.007	0.05278	2.21249	2	987.514	-1.06827	55.0996	0	C1203	48.15	B1503	0.0282
High	FSIPYIISY	1	1	1	Q6P587		0	583292	0.007	0.05503	2.17816	2	1102.58	0.0140384	103.388	0	C1203	85.19	C1203	0.0048
High	ETTKNVQQTV	2	1	1	O75586		0	1.89309e+06	0.007	0.05478	2.16772	2	1147.6	0.0027996	32.5516	0	C1203	42.86	A6802	0.5903
High	KLAVPSLIY	4	1	1	P78381		0	2.70125e+06	0.007	0.05912	2.16385	2	1003.62	-0.16387	78.5626	0	C1203	44.44	B1503	0.1413
High	VVKPPGSSL	9	1	1	Q92560		0	4.26742e+06	0.007	0.05421	2.16344	2	883.525	0.0413935	45.2675	0	C1203	48.15	C1203	0.0379
High	EQADIFERV	12	1	1	O60343		0	1.01975e+07	0.007	0.05187	2.1602	2	1106.55	-1.16306	63.5999	0	C1203	44.44	A6802	0.1776
High	RVNEPSIL	2	1	1	O14791		0	2.6932e+06	0.007	0.05718	2.15444	2	927.525	-0.905983	54.1445	0	C1203	43.33	C1203	1.9572
High	EASHITEQQL	7	1	1	Q9BV73		0	2.01989e+06	0.007	0.05137	2.14601	2	1155.56	-0.165225	44.0239	0	C1203	62.86	A6802	1.2743
High	VAFNWIIVH	2	1	1	Q92995		0	1.06121e+06	0.007	0.05964	2.14211	2	1098.61	-0.534296	88.3584	0	C1203	55.56	C1203	2.0058
High	AAIGLVIYY	4	1	1	P51571		0	5.19898e+06	0.007	0.05459	2.08017	2	982.561	-0.168734	94.5742	0	C1203	88.89	C1203	0.1308
High	EVAKVIVSM	4	1	1	Q99996		0	2.06447e+06	0.007	0.05424	2.07222	2	975.554	-0.64862	61.4902	0	C1203	40.74	A6802	0.0296
High	IASPVIAAV	2	1	1	Q6ZMZ0		0	3.46721e+06	0.007	0.05962	2.03335	2	840.519	-0.378312	74.4751	0	C1203	88.89	C1203	0.0227
High	IQAGIFQEF	2	1	1	O60671		0	1.34508e+06	0.007	0.05691	2.03325	2	1052.54	-0.334635	90.679	0	C1203	40.74	B1503	0.0062
High	AAYGRSPmV	2	1	1	Q04726	M8(Oxidation)	0	951008	0.007	0.05664	2.02139	2	967.466	-0.594629	39.9859	0	C1203	85.19	C1203	0.0671
High	GQRPTQPVY	6	1	1	Q9H0W8		0	5.05312e+06	0.007	0.05693	2.02049	2	1045.54	-0.138974	37.8334	0	C1203	48.15	B1503	0.0039
High	EVYTPKEIFV	1	1	1	O95297		0	2.60381e+06	0.007	0.05174	2.00926	2	1224.65	-0.250574	73.9538	0	C1203	31.43	A6802	0.0955
High	EAIGNPHHV	9	1	1	Q14146		0	3.30795e+06	0.007	0.05954	2.00061	2	973.485	-0.384763	28.2846	0	C1203	81.48	A6802	0.0442
High	RALALVVTL	4	1	1	O00622		0	1.32426e+07	0.007	0.05228	1.98414	2	955.629	-0.511883	80.7935	0	C1203	85.19	C1203	0.0638
High	YIFEEPFTI	3	1	1	P08237		0	634561	0.007	0.05225	1.92534	2	1158.57	0.239763	102.709	0	C1203	48.15	A6802	0.036
High	ETSKYYVTI	11	2	2	P68104;Q5VTE0		0	1.14938e+07	0.007	0.05767	1.91702	2	1103.56	-0.768915	61.0345	0	C1203	70.37	A6802	0.063
High	TQAPIFISF	4	1	1	Q15070		0	1.87337e+06	0.007	0.05559	1.79121	2	1023.55	-0.0492217	98.1477	0	C1203	44.44	B1503	0.0037
High	STAPPAHGV	9	1	1	P15941		0	1.93645e+07	0.007	0.05848	1.72363	2	836.426	-0.142685	29.5721	0	C1203	77.78	A6802	0.0052
High	YAAPGGLIGV	2	2	2	Q2VIR3;P41091		0	1.11401e+07	0.007	0.05857	1.5582	2	917.509	-0.332028	78.6739	0	C1203	62.86	A6802	0.0946
High	DIFEFLNHV	2	1	1	Q86VP6		0	691734	0.007	0.05157	1.53976	2	1133.56	-0.612276	101.218	0	C1203	44.44	A6802	0.0205
High	EIASITEQL	7	1	1	Q5UIP0		0	2.08435e+07	0.008	0.06154	2.59385	2	1003.53	-0.0957849	73.8426	0	C1203	44.44	A6802	0.0153
High	AAFDKIQQL	13	1	1	Q9P2I0		0	7.16409e+06	0.008	0.06176	2.54647	2	1033.57	-0.517653	62.4657	0	C1203	88.89	C1203	0.0051
High	KAIDVVVmV	5	1	1	Q8TDR0	M8(Oxidation)	0	5.4331e+06	0.008	0.06107	2.50592	2	989.57	-0.238	66.4918	0	C1203	85.19	C1203	0.0436
High	EVNKVISSV	11	1	1	Q93008		0	2.23433e+07	0.008	0.06003	2.29976	2	974.552	-0.174469	48.1705	0	C1203	40.74	A6802	0.0091
High	MQYPGRSLVF	2	1	1	Q9GZR7		0	1.31544e+06	0.008	0.06159	2.26276	2	1197.61	-0.487259	72.9155	0	C1203	48.57	B1503	0.0063
High	ESADIARAEV	7	1	1	A6NKF1		0	1.395e+06	0.008	0.06039	2.23975	2	1060.53	-0.543611	46.125	0	C1203	51.43	A6802	0.0396
High	ETHFTGNEV	6	1	1	Q9BX74		0	8.62257e+07	0.008	0.05977	2.21476	2	1033.46	-0.479834	40.4101	0	C1203	70.37	A6802	0.0515
High	AQRPTEQEL	10	1	1	Q9ULW3		0	1.79226e+06	0.008	0.06315	2.2051	2	1071.54	-0.518228	36.6422	0	C1203	51.85	B1503	0.0976
High	DASWVINGL	6	1	1	Q6IPM2		0	817806	0.008	0.06284	2.19136	2	974.494	-0.535003	93.9091	0	C1203	81.48	A6802	0.1648
High	SIAEVVHQL	2	1	1	O14976		0	1.23595e+06	0.008	0.06332	2.18496	2	995.552	-0.195724	67.1102	0	C1203	48.15	A6802	0.0145
High	EVTNVWINV	1	1	1	Q86TI2		0	0	0.008	0.06209	2.18301	2	1073.56	-0.191672	86.4223	0	C1203	40.74	A6802	0.0448
High	YKIPYTTVL	3	1	1	Q08945		0	0	0.008	0.06176	2.15385	2	1097.62	-0.508868	75.5125	0	C1203	51.85	B1503	0.0536
High	EIMEIMQNL	1	1	1	Q13352		0	531328	0.008	0.05994	2.11611	2	1120.54	-0.757197	92.9816	0	C1203	40.74	A6802	0.0201
High	KLNGQVLVF	3	1	1	Q15459		0	3.60043e+06	0.008	0.06029	2.10925	2	1017.61	-0.61241	71.5795	0	C1203	44.44	B1503	0.0678
High	AQISWVTVF	2	1	1	Q9NZ01		0	1.18043e+06	0.008	0.06076	2.06292	2	1050.56	-0.314369	101.157	0	C1203	44.44	B1503	0.0067
High	KKDPNKPLTY	1	1	1	P14902		0	572501	0.008	0.0633	1.98179	3	1203.67	-0.143294	29.3357	0	C1203	40	B1503	0.2018
High	DASEIQVQV	6	1	1	P18858		0	4.47403e+06	0.009	0.06508	2.58058	2	988.494	-0.181018	66.6353	0	C1203	85.19	A6802	0.0625
High	VKLDVFFFY	1	1	1	O75072		0	1.21061e+06	0.009	0.06597	2.5473	2	1177.63	-0.770874	88.9919	0	C1203	44.44	B1503	0.661
High	DTAHVLFTL	5	1	1	Q6YHU6		0	5.19055e+06	0.009	0.07007	2.44561	2	1016.54	-0.756943	85.3312	0	C1203	74.07	A6802	0.0241
High	RQALLLLAL	3	1	1	Q7Z7H5		0	2.83856e+06	0.009	0.06744	2.35399	2	1010.67	-0.206498	91.9693	0	C1203	44.44	B1503	0.5204
High	EVTLIHSQV	5	1	1	Q9BRQ8		0	2.27706e+06	0.009	0.06905	2.32262	2	1025.56	-1.02409	56.2532	0	C1203	37.04	A6802	0.0563
High	GAYKYIQEL	4	1	1	P61313		0	3.54352e+06	0.009	0.06655	2.31793	2	1084.57	-0.386486	64.811	0	C1203	85.19	C1203	0.0446
High	SLSAIFNNV	1	1	1	Q99808		0	946958	0.009	0.06716	2.24975	2	964.51	-0.302969	85.7565	0	C1203	40.74	A6802	0.3527
High	GAYGKVFLV	20	2	2	O75676;O75582		0	1.35647e+07	0.009	0.06521	2.24179	2	953.545	-0.258667	70.3871	0	C1203	85.19	C1203	0.2158
High	YASSKLLKI	1	1	1	O95067		0	2.21867e+06	0.009	0.06919	2.23965	2	1022.62	-0.410966	53.5221	0	C1203	81.48	C1203	0.1285
High	SSVEHVVEF	4	1	1	O75197		0	3.78693e+06	0.009	0.06525	2.23472	2	1032.5	-0.718968	60.1132	0	C1203	74.07	C1203	0.0488
High	HKVANTSSF	2	1	1	O43683		0	959853	0.009	0.06814	2.20486	2	990.5	-0.491476	28.2525	0	C1203	29.63	B1503	0.0176
High	FTSSRHTVV	6	1	1	Q9NZ01		0	5.48224e+06	0.009	0.06701	2.20232	2	1033.54	-0.376805	31.8145	0	C1203	81.48	C1203	0.2567
High	ETSDILQRV	12	1	1	Q14164		0	6.60222e+06	0.009	0.06974	2.17533	2	1060.56	-0.191737	58.5476	0	C1203	74.07	A6802	0.0048
High	RAAPFSLEY	4	1	1	Q15181		0	6.60783e+06	0.009	0.06565	2.16825	2	1053.54	-0.566758	67.6518	0	C1203	92.59	C1203	0.008
High	EVVAGSHEL	3	1	1	Q01082		0	1.70693e+06	0.009	0.06686	2.16365	2	940.474	0.146815	42.4814	0	C1203	40.74	A6802	0.0279
High	AKFSRPAQL	5	1	1	P22314		0	2.90795e+06	0.009	0.0646	2.12583	2	1017.58	-0.788912	41.5823	0	C1203	51.85	B1503	0.2105
High	YASNITSVL	4	2	2	Q13085;O00763		0	7.5598e+06	0.009	0.06754	2.07139	2	967.509	-0.129531	75.7673	0	C1203	85.19	C1203	0.0072
High	QKAPDGKSY	3	1	1	Q9HBL8		0	494670	0.009	0.06522	1.98279	2	993.5	-0.280702	21.6939	0	C1203	51.85	B1503	0.1579
High	QVIKPPLIFV	3	1	1	Q13428		0	3.86674e+06	0.009	0.06584	1.98163	2	1153.73	-0.298953	89.1007	0	C1203	28.57	A6802	0.152
High	TLADIIIGI	3	1	1	Q9NP58		0	1.5524e+06	0.009	0.06483	1.94671	2	928.571	-0.409031	104.733	0	C1203	44.44	A6802	0.0203
High	RAFGGILVV	1	1	1	Q8NHX9		0	3.99648e+07	0.009	0.06764	1.5643	2	931.572	-0.574644	77.9178	0	C1203	92.59	C1203	0.0088
Medium	FAKAGKLLVV	1	1	1	Q9HAW7		0	0	0.01	0.07067	2.86677	2	1045.68	-1.24952	59.6586	0	C1203	71.43	C1203	3.0105
Medium	ELSNVLAAM	4	1	1	Q9Y3U8		0	1.63807e+06	0.01	0.07422	2.68694	2	947.487	-0.150367	84.4952	0	C1203	33.33	A6802	0.4543
Medium	EIADLVTSV	4	1	1	Q5MIZ7		0	2.14522e+06	0.01	0.07496	2.59909	2	946.509	-0.5787	79.7976	0	C1203	48.15	A6802	0.0038
Medium	KAPDFVFYA	2	3	3	P15311;P26038;P35241		0	1.02078e+07	0.01	0.07054	2.52096	2	1057.53	-1.40915	75.0315	0	C1203	44.44	A6802	0.6386
Medium	GKRTDEAAF	1	1	1	P26447		0	1.20398e+06	0.01	0.07097	2.50181	2	994.495	-0.311333	28.9401	0	C1203	29.63	B1503	0.1473
Medium	FKAIGTAY	1	1	1	Q9NXW2		0	1.2653e+06	0.01	0.07304	2.49322	2	870.471	-0.676863	51.761	0	C1203	40	B1503	0.3426
Medium	AQFKGTQSL	2	1	1	Q9UK61		0	5.30645e+06	0.01	0.07155	2.42097	2	979.521	-0.210193	43.6795	0	C1203	44.44	B1503	0.0068
Medium	ASGLIHRV	4	1	1	Q8N6L1		0	1.06637e+07	0.01	0.07067	2.37926	2	852.505	-0.284994	51.049	0	C1203	70	A6802	14.5201
Medium	ALmPPFTAF	5	1	1	P51955	M3(Oxidation)	0	2.0987e+06	0.01	0.07284	2.36378	2	1010.5	-0.897886	94.8152	0	C1203	40.74	B1503	0.0066
Medium	DVSSILTSI	4	2	2	P49459;P63146		0	1.18025e+06	0.01	0.07307	2.34696	2	934.509	0.208321	96.5756	0	C1203	37.04	A6802	0.0302
Medium	SAVSVAERV	1	1	1	Q08211		0	368771	0.01	0.07258	2.22625	2	917.505	-0.0750061	45.537	0	C1203	77.78	A6802	0.1903
Medium	KSVDWLLVF	2	1	1	Q96J42		0	1.34781e+06	0.01	0.07139	2.22332	2	1106.62	-0.0669177	99.4057	0	C1203	70.37	C1203	0.219
Medium	QKAEVGSPL	2	1	1	P0C7P0		0	3.06219e+06	0.01	0.07408	2.21183	2	928.51	-0.128282	42.7994	0	C1203	44.44	B1503	1.0156
Medium	EVYPGTYSV	8	1	1	Q9NQ31		0	1.0562e+07	0.01	0.0747	2.16838	2	1014.48	-0.581397	64.558	0	C1203	48.15	A6802	0.0009
Medium	ESFGNEIYTV	3	1	1	O43148		0	2.36721e+06	0.01	0.07451	2.1185	2	1158.53	-0.177614	76.5757	0	C1203	57.14	A6802	0.0634
Medium	EGVDIILGV	1	1	1	P11171		0	4.43534e+06	0.01	0.07353	2.05419	2	914.519	-0.117687	93.3563	0	C1203	48.15	A6802	0.0662
Medium	EVARIQLQI	2	1	1	O75694		0	2.07852e+06	0.01	0.07336	2.04063	2	1069.64	-0.865392	71.4744	0	C1203	37.04	A6802	0.0553
Medium	EVFHAGTAL	3	1	1	P22102		0	3.12203e+06	0.01	0.07483	1.91201	2	944.483	-0.798935	55.735	0	C1203	40.74	A6802	0.0611
Medium	KKLDEQYQKY	1	1	1	P61758		0	666662	0.01	0.07021	1.86494	3	1342.7	-0.11578	31.8631	0	C1203	37.14	B1503	0.6443
Medium	EIYKEFFEV	1	1	1	O00255		0	1.88825e+06	0.01	0.07119	1.51518	2	1203.59	-0.162948	81.813	0	C1203	44.44	A6802	0.0283
Medium	RQIDQFLVV	7	2	2	O94776;Q9BTC8		0	1.2327e+07	0.01	0.07174	1.32469	2	1117.64	-0.719004	76.7951	0	C1203	48.15	B1503	0.0831
Medium	AKTQGNVF	3	1	1	O15371		0	3.20096e+06	0.011	0.07868	2.76342	2	864.457	-0.054688	36.1043	0	C1203	30	B1503	1.7013
Medium	AKKPPVTF	7	1	1	Q14134		0	1.34759e+07	0.011	0.07928	2.72019	2	887.535	-0.139332	40.1088	0	C1203	36.67	B1503	0.5924
Medium	SAVGHVFSL	2	1	1	Q69YN4		0	2.45257e+06	0.011	0.07599	2.63552	2	916.489	-0.0395426	67.494	0	C1203	81.48	C1203	0.0113
Medium	GKPVVNVSY	1	1	1	Q16690		0	1.41627e+06	0.011	0.07954	2.59206	2	962.53	-0.407607	50.2701	0	C1203	40.74	B1503	0.2699
Medium	TSVPELQIPL	2	1	1	Q96R09		0	8.10097e+06	0.011	0.07773	2.51275	2	1096.62	-0.423165	94.2468	0	C1203	54.29	A6802	2.3343
Medium	SSYPRPLTY	1	1	1	P15407		0	937066	0.011	0.07974	2.50872	2	1083.55	-0.477121	55.484	0	C1203	88.89	C1203	0.0021
Medium	KVANIIAEV	2	1	1	P52306		0	2.50472e+06	0.011	0.07772	2.43869	2	956.577	-0.828485	63.8404	0	C1203	48.15	A6802	0.0455
Medium	DTFRGVAFV	9	1	1	O15067		0	3.49765e+07	0.011	0.07734	2.42199	2	1011.53	-0.780294	74.0845	0	C1203	74.07	A6802	0.0107
Medium	NIFRNVEV	8	2	2	Q7L523;Q5VZM2		0	3.24767e+07	0.011	0.07829	2.2632	2	990.536	-1.13091	64.3642	0	C1203	50	A6802	4.4054
Medium	SKSPASSSL	2	1	1	Q9HBL0		0	529506	0.011	0.07885	2.26193	2	863.447	0.171155	28.7448	0	C1203	48.15	B1503	0.3305
Medium	DQSYVISFV	6	1	1	O60488		0	2.80181e+06	0.011	0.07624	2.23077	2	1057.52	-0.936846	92.9225	0	C1203	44.44	A6802	0.6442
Medium	MSYEQLMQL	1	1	1	P62841		0	340352	0.011	0.07682	2.19534	2	1142.52	-0.169025	92.1307	0	C1203	74.07	C1203	0.0093
Medium	NSSDVLVYV	2	1	1	Q86VI4		0	2.96177e+06	0.011	0.07735	1.99214	2	995.504	-0.418297	79.0216	0	C1203	77.78	A6802	0.0067
Medium	GKAFSQKQY	2	1	1	Q15072		0	491934	0.011	0.08005	1.9807	2	1056.55	-0.820582	27.7801	0	C1203	44.44	B1503	0.2767
Medium	SQVPTQmSF	2	1	1	Q8TEL6	M7(Oxidation)	0	1.50466e+06	0.011	0.07851	1.96787	2	1040.47	-0.389463	53.8126	0	C1203	37.04	B1503	0.0021
Medium	HTADIQSEV	1	1	1	P08581		0	1.77793e+06	0.011	0.07842	1.95215	2	999.474	-0.337961	41.3005	0	C1203	77.78	A6802	0.0032
Medium	EASSVKNEL	4	1	1	Q9P2D1		0	2.50767e+06	0.011	0.0788	1.92926	2	976.494	-0.308252	36.8848	0	C1203	85.19	A6802	0.4395
Medium	YKKGDANTY	1	1	1	Q9NVX7		0	227497	0.011	0.07622	1.67181	2	1059.51	-0.369855	20.9361	0	C1203	48.15	B1503	0.0279
Medium	YKKGKDSLY	5	2	2	P83881;Q969Q0		0	553176	0.011	0.07967	1.55859	2	1101.59	-0.76809	27.0591	0	C1203	44.44	B1503	0.1869
Medium	TVANFLSLF	1	1	1	Q8TE23		0	2.35573e+06	0.012	0.08622	2.70548	2	1011.55	0.372562	77.2362	0	C1203	33.33	C1203	0.444
Medium	IQTRGGTF	2	1	1	O14672		0	3.67533e+06	0.012	0.0868	2.66771	2	879.468	-0.371996	38.0483	0	C1203	26.67	B1503	0.6922
Medium	GQTGTGKTF	4	2	2	P52732;Q9Y496		0	548882	0.012	0.08128	2.62319	2	896.447	-0.282506	28.1534	0	C1203	40.74	B1503	0.0184
Medium	AQRYLLQY	7	1	1	P25789		0	6.78826e+06	0.012	0.08101	2.54748	2	1054.57	-1.25484	61.7865	0	C1203	26.67	B1503	0.3586
Medium	SKAPDGSTL	1	1	1	Q9BXS9		0	541030	0.012	0.08543	2.45759	2	875.447	-0.0517705	31.9028	0	C1203	51.85	B1503	0.3151
Medium	GKNPFLGIAY	1	2	2	Q9NV96;Q3MIR4		0	1.11335e+06	0.012	0.08655	2.36665	2	1079.59	-0.249109	75.6368	0	C1203	34.29	B1503	0.145
Medium	LTSDIIESI	2	1	1	P32780		0	2.79228e+06	0.012	0.08115	2.29943	2	990.535	-0.763999	82.4365	0	C1203	70.37	A6802	0.029
Medium	AAAALVLKA	3	1	1	Q9Y490		0	3.2709e+06	0.012	0.08279	2.28887	2	827.535	-0.0877631	55.4703	0	C1203	51.85	A6802	2.3474
Medium	YmFVDENTF	1	3	3	A6ZKI3;Q9BWD3;Q17RB0	M2(Oxidation)	0	1.70617e+06	0.012	0.08603	2.18587	2	1181.48	-0.632705	77.7786	0	C1203	40.74	B1503	0.0565
Medium	SVIDIINGEA	2	1	1	Q7L5N1		0	1.84478e+06	0.012	0.0809	2.15302	2	1030.54	0.0992442	80.8998	0	C1203	5.71	A6802	0.1329
Medium	AKAYPPTSm	4	1	1	Q8NCW5	M9(Oxidation)	0	0	0.012	0.08717	2.13948	2	981.471	-0.353155	34.2138	0	C1203	40.74	B1503	0.0387
Medium	TVTTVILEV	4	1	1	Q9UKF6		0	3.27957e+07	0.012	0.08719	1.98604	2	974.576	-0.553836	86.3871	0	C1203	48.15	A6802	0.0526
Medium	QSVDLVFPV	8	1	1	Q9NQ31		0	4.45539e+07	0.012	0.08604	1.95142	2	1003.55	-0.461907	94.4459	0	C1203	74.07	A6802	0.1091
Medium	NVTSIMFLV	2	2	2	P29992;P50148		0	1.06065e+06	0.012	0.08379	1.94186	2	1023.55	-0.727694	104.212	0	C1203	40.74	A6802	0.0457
Medium	EVISGFYLV	1	1	1	Q8IYB1		0	1.62001e+06	0.012	0.08356	1.73131	2	1026.55	-0.550264	97.0716	0	C1203	40.74	A6802	0.0053
Medium	EVAKIIYIV	5	1	1	P25788		0	1.17991e+07	0.012	0.08695	1.58538	2	1047.64	-0.540825	78.2193	0	C1203	44.44	A6802	0.0073
Medium	SIHVGQAGV	4	5	5	Q71U36;P68363;Q9BQE3;Q13748;Q6PEY2		0	707638	0.013	0.0912	2.71512	2	867.468	-0.306781	44.481	0	C1203	37.04	A6802	0.6884
Medium	AKQDAQILY	1	1	1	P12429		0	1.66241e+06	0.013	0.08838	2.44538	2	1049.56	-2.28004	49.653	0	C1203	48.15	B1503	0.0329
Medium	EAMKQILGV	3	1	1	Q14444		0	3.06717e+06	0.013	0.08738	2.36711	2	988.549	-0.527476	64.8254	0	C1203	81.48	A6802	0.0393
Medium	AQLLVLYY	3	1	1	Q9H0H0		0	5.19898e+06	0.013	0.08892	2.20429	2	982.561	-0.0343193	94.729	0	C1203	30	B1503	0.9333
Medium	AAFDGHAREL	1	1	1	Q3MIP1		0	1.48009e+06	0.013	0.08925	2.15436	2	1086.53	-0.766981	42.3744	0	C1203	82.86	C1203	0.3533
Medium	QAAGVSVHV	2	1	1	Q5T4B2		0	1.21713e+06	0.013	0.09022	2.07143	2	867.468	0.0450191	45.3118	0	C1203	85.19	A6802	0.0169
Medium	HVASVVNQSV	4	1	1	P15822		0	1.26918e+06	0.013	0.0905	1.98625	2	1039.55	-0.796119	43.3286	0	C1203	28.57	A6802	0.0697
Medium	ETSPHTFQL	3	1	1	Q69YN4		0	9480183	0.013	0.09085	1.92263	2	1059.51	-0.379293	57.8617	0	C1203	77.78	A6802	0.0155
Medium	AQRFEDGTISF	1	1	1	Q96EN8		0	1.27727e+06	0.013	0.08993	1.90105	2	1270.61	-0.425632	66.9752	0		0	B1503	0.072
Medium	DTAPVIIFV	7	1	1	Q7Z2Z2		0	9.03469e+06	0.013	0.08829	1.79112	2	974.556	-0.238821	101.948	0	C1203	85.19	A6802	0.0034
Medium	RKIGRDQELY	1	1	1	P26639		0	2.57669e+06	0.013	0.09117	1.68176	3	1277.7	-0.0729915	34.4528	0	C1203	31.43	B1503	0.3619
Medium	EVLQILTQV	1	1	1	Q9Y6V7		0	1.69167e+06	0.014	0.09269	2.53023	2	1042.61	-0.610236	93.0332	0	C1203	37.04	A6802	0.0311
Medium	RSATLAAAAL	4	1	1	Q8NG41		0	6.55587e+06	0.014	0.09286	2.47896	2	944.552	-0.51222	38.8555	0	C1203	51.43	C1203	4.6873
Medium	EVSEIHIKV	2	1	1	P30414		0	2.46519e+06	0.014	0.09383	2.43704	2	1053.59	-1.63309	54.0642	0	C1203	48.15	A6802	0.0039
Medium	KAVGHPFVI	8	1	1	O14980		0	1.73495e+07	0.014	0.09861	2.34794	2	967.571	-1.04757	52.1001	0	C1203	77.78	C1203	0.1068
Medium	QHASPAGTY	1	2	2	P05187;P09923		0	467121	0.014	0.09586	2.18894	2	931.427	-0.169588	29.2159	0	C1203	48.15	B1503	0.2549
Medium	YGMPRQIL	1	1	1	P37802		0	722816	0.014	0.09274	2.1555	2	977.523	-0.761601	64.4347	0	C1203	46.67	C1203	1.7406
Medium	FAMYPPSmI	3	2	2	P30279;P30281	M8(Oxidation)	0	0	0.014	0.09475	2.14528	2	1072.48	-0.527862	85.1014	0	C1203	74.07	C1203	0.0399
Medium	KKNPSSPLY	4	1	1	O95478		0	1.38006e+06	0.014	0.09706	2.13494	2	1033.57	-0.734515	33.165	0	C1203	44.44	B1503	0.0148
Medium	EVGPPLPPLL	6	1	1	Q9Y2F5		0	2.37824e+06	0.014	0.09294	2.04799	2	1031.61	-0.520148	99.6881	0	C1203	42.86	A6802	0.7259
Medium	ETARIAQLV	1	1	1	Q8NHU6		0	3.90468e+06	0.014	0.09802	2.02907	2	1000.58	-0.875442	60.2763	0	C1203	70.37	A6802	0.0164
Medium	QAYPTTVVF	1	1	1	Q8IXB1		0	6.33303e+06	0.014	0.0941	2.02207	2	1025.53	-0.884252	79.8166	0	C1203	85.19	C1203	0.006
Medium	IAVNAVLTV	10	1	1	P48643		0	7.035e+06	0.014	0.09731	2.00891	2	899.556	-0.422029	82.8519	0	C1203	85.19	C1203	0.0444
Medium	VSFPYVIAL	1	1	1	Q8WUH2		0	719023	0.014	0.09975	1.95826	2	1008.58	-0.804246	105.11	0	C1203	88.89	C1203	0.0104
Medium	ELSPVRAEL	2	1	1	Q9BTE3		0	4.41771e+06	0.014	0.09486	1.93142	2	1013.56	-1.41726	59.8291	0	C1203	51.85	A6802	0.1277
Medium	RKLFIGGLSF	2	4	4	Q32P51;P09651;P22626;P51991		0	5.41036e+06	0.014	0.09665	1.91439	2	1137.68	-1.00722	77.6621	0	C1203	37.14	B1503	0.0701
Medium	YTFPQILGV	5	1	1	Q8N8U2		0	1.2523e+06	0.014	0.09878	1.73483	2	1037.57	-1.23952	100.756	0	C1203	88.89	A6802	0.0042
Medium	EVHTDTNKI	1	1	1	O00299		0	71158.8	0.014	0.09504	1.5138	2	1056.53	0.442014	28.0052	0	C1203	29.63	A6802	0.2904
Medium	KAYGASKTF	4	1	1	P27694		0	1.64944e+06	0.015	0.1011	2.59316	2	972.515	-0.440476	30.8168	0	C1203	81.48	C1203	0.01
Medium	FVEWIPNNV	4	8	8	Q9H4B7;Q13885;Q9BVA1;Q13509;P04350;P68371;P07437;Q9BUF5		0	3.56751e+06	0.015	0.1034	2.49925	2	1117.57	-0.697202	89.2772	0	C1203	44.44	A6802	0.1248
Medium	YASGINVNL	1	1	1	A2VDJ0		0	4.12618e+06	0.015	0.1029	2.47892	2	950.494	-0.399042	72.3637	0	C1203	88.89	A6802	0.0377
Medium	TAFPKPLLT	7	1	1	Q9BZG8		0	8.57756e+06	0.015	0.1039	2.20916	2	987.586	-0.929458	67.0207	0	C1203	55.56	C1203	0.9088
Medium	NSSQVVVAV	6	1	1	Q16531		0	1.03578e+08	0.015	0.1014	2.20557	2	902.494	-0.228458	58.8796	0	C1203	77.78	A6802	0.0339
Medium	ETVDLIKFI	3	1	1	P51825		0	1.36362e+06	0.015	0.1031	2.12396	2	1077.62	-0.929559	91.4364	0	C1203	70.37	A6802	0.034
Medium	HSSGINVNA	4	1	1	Q14444		0	6.5537e+07	0.015	0.1033	2.10807	2	898.437	-0.702272	34.6054	0	C1203	40.74	A6802	0.3376
Medium	EVSPSTLFAV	3	1	1	Q9NPH2		0	845783	0.015	0.1028	1.78219	2	1049.55	-0.312811	89.9558	0	C1203	28.57	A6802	0.0723
Medium	LVSPITGEKI	2	1	1	Q15459		0	1.59203e+06	0.015	0.1037	1.72596	2	1056.63	-0.519738	64.6184	0	C1203	20	A6802	1.2718
Medium	NTSSTNHQL	2	1	1	Q9H992		0	664838	0.015	0.1018	1.6519	2	1001.46	-0.460663	21.4249	0	C1203	74.07	A6802	0.1248
Medium	FSLPYVQYF	3	1	1	P15291		0	299076	0.015	0.1012	1.47919	2	1163.58	0.213889	104.934	0	C1203	74.07	C1203	0.0412
Medium	EVPPPFTLV	18	1	1	Q8NI35		0	2.54062e+07	0.016	0.1106	2.66519	2	998.555	-1.14993	94.841	0	C1203	44.44	A6802	0.0081
Medium	DLSSVISKI	6	1	1	Q6PL18		0	2.18764e+06	0.016	0.1072	2.62602	2	961.556	-0.356082	82.1183	0	C1203	40.74	A6802	0.5587
Medium	NAFHHPSAV	7	1	1	P32314		0	1.54806e+06	0.016	0.1105	2.51113	2	979.474	-0.433577	34.0983	0	C1203	81.48	A6802	0.0977
Medium	ESAWVLTNI	2	1	1	P52294		0	3.02437e+06	0.016	0.1085	2.45022	2	1032.54	-0.376907	91.4274	0	C1203	62.96	A6802	0.0393
Medium	FSTTVIQNV	2	1	1	Q9Y5K8		0	5089946	0.016	0.1105	2.43622	2	1008.54	-0.678554	71.0062	0	C1203	74.07	A6802	0.1988
Medium	YQHDDGRVSY	2	1	1	P60983		0	802883	0.016	0.1094	2.41924	3	1239.54	0.469594	33.369	0	C1203	40	B1503	0.0066
Medium	KKSEGSLAY	2	1	1	Q96KP1		0	1.39022e+06	0.016	0.1093	2.32711	2	982.52	-0.422592	29.2512	0	C1203	48.15	B1503	0.0093
Medium	EAIGFATTV	3	1	1	Q8IWV8		0	2.96511e+06	0.016	0.1071	2.32572	2	908.472	-0.22646	73.768	0	C1203	81.48	A6802	0.0079
Medium	TTASIATTL	1	1	1	O60331		0	2.43187e+06	0.016	0.1061	2.24504	2	878.483	-0.154374	63.0913	0	C1203	77.78	A6802	0.0193
Medium	LKVKGNVF	3	1	1	P84098		0	2.319e+06	0.016	0.1053	2.18755	2	904.561	-0.271335	45.4242	0	C1203	33.33	B1503	1.1998
Medium	AKYKNQVVY	1	1	1	Q9NVR2		0	616335	0.016	0.1082	2.18255	2	1112.61	-0.640694	34.9122	0	C1203	51.85	B1503	0.0038
Medium	YNFEYSVVF	2	1	1	O75787		0	864263	0.016	0.1052	2.17839	2	1167.54	0.393231	96.1387	0	C1203	48.15	B1503	0.1325
Medium	EVSKAIINI	6	1	1	Q9NXP7		0	1.27255e+07	0.016	0.1099	2.17	2	986.588	-0.556755	64.2169	0	C1203	40.74	A6802	0.0225
Medium	EVQNILSFL	2	1	1	Q96AC1		0	1.56164e+06	0.016	0.1098	2.16863	2	1062.58	0.252453	106.455	0	C1203	37.04	A6802	0.0795
Medium	LTVPFARYL	4	2	2	P12081;P49590		0	3.26165e+06	0.016	0.1084	2.09102	2	1079.62	-0.364991	89.2443	0	C1203	77.78	C1203	0.1659
Medium	RSSPPGHYY	3	1	1	Q9NX40		0	2.41395e+06	0.016	0.1054	2.04671	2	1063.5	-0.391646	30.9531	0	C1203	77.78	C1203	0.1025
Medium	GKSLTTSQY	1	1	1	Q9NZB2		0	775471	0.016	0.1088	1.90258	2	984.499	-0.299734	35.5241	0	C1203	40.74	B1503	0.1605
Medium	STYIKKIGY	1	2	2	P68104;Q5VTE0		0	1.08574e+06	0.016	0.1073	1.90091	2	1072.6	-0.507445	45.5793	0	C1203	74.07	C1203	0.3439
Medium	GKFSSDRTITEY	1	1	1	P11216		0	1.03746e+06	0.016	0.1087	1.85303	3	1403.68	-0.327459	46.256	0		0	B1503	1.287
Medium	RQADFVQVL	4	1	1	Q9Y2V7		0	2.14114e+07	0.016	0.1107	1.79574	2	1075.59	-1.24484	67.9009	0	C1203	51.85	B1503	0.0104
Medium	TTSHLHQAV	2	1	1	P22695		0	1.21649e+06	0.016	0.1074	1.37147	2	993.511	-0.393029	24.1881	0	C1203	70.37	A6802	0.0974
Medium	RKEETVTVY	9	1	1	Q9BZX2		0	6.19296e+06	0.017	0.1146	2.76078	2	1124.59	-0.75912	36.786	0	C1203	48.15	B1503	0.0125
Medium	SQGVHISVY	4	1	1	O43395		0	1379038	0.017	0.1109	2.70986	2	989.504	-0.779421	55.4815	0	C1203	44.44	B1503	0.0117
Medium	YKAPILLAL	2	1	1	O60341		0	897237	0.017	0.1121	2.56118	2	1001.64	-0.335066	86.7701	0	C1203	55.56	B1503	0.1787
Medium	GKAFNSSSY	1	1	1	Q9ULM2		0	321280	0.017	0.1134	2.44547	2	960.442	-0.418844	36.5136	0	C1203	40.74	B1503	0.0613
Medium	DAARAIAGV	3	1	1	O75821		0	2.27198e+06	0.017	0.1112	2.39213	2	843.469	1.10802	48.7717	0	C1203	81.48	A6802	0.0326
Medium	IASLKAEV	1	1	1	Q8IUN9		0	1.00954e+06	0.017	0.1156	2.3874	2	830.498	-0.176793	44.6916	0	C1203	76.67	C1203	9.2562
Medium	STIGQAFEL	5	2	2	P29353;Q6S5L8		0	3.53613e+06	0.017	0.1135	2.23614	2	965.493	-0.756788	82.7789	0	C1203	74.07	A6802	0.0363
Medium	ETHFGFETV	7	1	1	Q5HYK3		0	1.31825e+07	0.017	0.1121	2.22474	2	1066.48	-0.787077	66.3553	0	C1203	70.37	A6802	0.0144
Medium	EAVSVIQSI	9	1	1	Q9P035		0	1.20696e+07	0.017	0.117	2.19178	2	945.525	-0.502893	74.5035	0	C1203	74.07	A6802	0.0782
Medium	KAYANPTVV	3	1	1	Q86XK2		0	8.53759e+06	0.017	0.1126	2.10445	2	962.53	-0.217373	44.0899	0	C1203	85.19	C1203	0.0129
Medium	EIVTIWDSV	2	1	1	Q8IWA0		0	3.13361e+06	0.017	0.1114	2.03473	2	1061.55	-1.11422	95.049	0	C1203	37.04	A6802	0.101
Medium	YAQWYPIVV	1	1	1	Q07157		0	556693	0.017	0.1125	2.00836	2	1138.59	-0.2092	97.8438	0	C1203	88.89	C1203	0.3011
Medium	FIIVVVNIF	2	1	1	Q92982		0	1.59277e+06	0.017	0.1168	1.72891	2	1063.65	-0.233671	93.6661	0	C1203	37.04	C1203	1.8757
Medium	FQKPSGVSA	1	1	1	Q9Y3A4		0	1.01152e+06	0.017	0.1109	1.64586	2	920.483	-0.355611	39.9791	0	C1203	14.81	B1503	0.4399
Medium	LQAVELQGL	7	1	1	Q96HA7		0	8.16216e+06	0.018	0.1192	2.45989	2	970.556	-0.38866	86.6505	0	C1203	40.74	B1503	1.3403
Medium	NTLQTKVQL	5	1	1	Q9NT22		0	3.7924e+07	0.018	0.1187	2.39498	2	1044.61	3.00252	102.588	0	C1203	70.37	A6802	0.6562
Medium	FQRGNDVAF	3	1	1	P17931		0	4.18313e+06	0.018	0.1219	2.3822	2	1053.51	-1.61576	51.1613	0	C1203	40.74	B1503	0.0058
Medium	EASDVVLEVL	1	1	1	Q9BVP2		0	846386	0.018	0.1218	2.23911	2	1073.57	-0.78097	92.4262	0	C1203	68.57	A6802	0.6131
Medium	EVSRISEVL	3	1	1	Q07065		0	4.95669e+06	0.018	0.1196	2.21827	2	1031.57	-4.17427	61.065	0	C1203	44.44	A6802	0.1187
Medium	YAAGFIFTT	3	2	2	P22557;P13196		0	2.38e+06	0.018	0.1194	2.21711	2	990.493	-0.298689	87.3935	0	C1203	55.56	A6802	0.2042
Medium	EEAQRKSTY	1	1	1	Q7Z2Y8		0	860162	0.018	0.1202	2.08651	2	1111.54	-0.414008	36.6525	0	C1203	44.44	B1503	1.608
Medium	EVVSHTSQV	4	1	1	Q8IX04		0	8.72851e+06	0.018	0.1209	2.0788	2	985.494	-0.568213	32.1606	0	C1203	40.74	A6802	0.0158
Medium	GQTKPVVVY	1	1	1	Q9NRZ9		0	1.74581e+06	0.018	0.1204	2.07753	2	990.562	-0.323315	47.1225	0	C1203	48.15	B1503	0.0072
Medium	AASPIITLV	2	1	1	Q8TEM1		0	6.96691e+06	0.018	0.1242	2.00443	2	884.545	0.0252269	87.7119	0	C1203	92.59	C1203	0.0772
Medium	ETYLNISQV	4	1	1	O94768		0	2.27955e+06	0.018	0.1189	1.97036	2	1066.54	-0.448249	75.9295	0	C1203	74.07	A6802	0.014
Medium	AKPDSTLHTY	1	1	1	Q6NUQ4		0	665230	0.018	0.122	1.76748	2	1132.56	-0.161889	34.1932	0	C1203	40	B1503	0.324
Medium	QQSPGSKAF	2	1	1	Q96P71		0	451241	0.018	0.1176	1.75883	2	949.473	-0.45927	32.3682	0	C1203	44.44	B1503	0.0095
Medium	IGAARTKTY	1	1	1	Q9Y3B1		0	482898	0.018	0.1199	1.75439	2	980.552	-0.659755	26.4327	0	C1203	48.15	C1203	0.3498
Medium	NFFPGVFEY	3	1	1	Q76I76		0	558757	0.018	0.1242	1.71823	2	1119.51	-0.360464	101.42	0	C1203	55.56	C1203	0.4299
Medium	HTVWIPWNV	2	1	1	Q9P273		0	3.77795e+06	0.018	0.1201	1.656	2	1151.6	-0.233125	88.9236	0	C1203	70.37	A6802	0.0317
Medium	GKHQPHKVTQY	1	2	2	P83881;Q969Q0		0	0	0.018	0.1227	1.20709	3	1322.7	0.179639	21.2062	0		0	B1503	1.4107
Medium	EVSNLYNNI	2	1	1	O94874		0	1.42547e+06	0.019	0.1276	2.49113	2	1065.52	-0.664426	66.9098	0	C1203	33.33	A6802	0.0536
Medium	YSADGHSIL	2	1	1	Q15269		0	2.37964e+06	0.019	0.1276	2.39662	2	962.458	-0.31711	53.708	0	C1203	77.78	C1203	0.0298
Medium	HKVISGTTL	1	1	1	Q9NUL3		0	2.29425e+06	0.019	0.1252	2.19744	2	955.557	-0.154779	38.1971	0	C1203	40.74	B1503	0.2142
Medium	RQNIGVATF	3	1	1	Q9NTJ3		0	2.02312e+06	0.019	0.1279	2.07617	2	1005.55	-1.02817	57.1327	0	C1203	37.04	B1503	0.0018
Medium	ATTQILEEL	2	1	1	P49454		0	4.50704e+06	0.019	0.1268	1.94281	2	1017.55	0.000930855	81.2855	0	C1203	74.07	A6802	0.8674
Medium	RKSGVGNVF	1	2	2	Q13310;Q5JQF8		0	1.00303e+06	0.019	0.1264	1.64594	2	963.536	-1.26209	39.1269	0	C1203	40.74	B1503	0.0085
Medium	HQSPSSSSY	1	1	1	O43298		0	225492	0.019	0.1287	1.38988	2	979.411	-0.399106	24.5799	0	C1203	48.15	B1503	0.0043
Medium	AKHTNFVEF	1	1	1	P53680		0	3.40314e+06	0.02	0.136	2.62679	2	1092.55	-1.24962	52.04	0	C1203	40.74	B1503	0.0305
Medium	AKFKSSIY	2	1	1	Q9Y6V7		0	2.66895e+06	0.02	0.1305	2.39696	2	943.525	0.318712	39.1226	0	C1203	40	B1503	0.3481
Medium	SQFHGLITHY	4	1	1	Q92845		0	1.74097e+06	0.02	0.1334	2.38021	3	1202.6	0.0833896	55.6813	0	C1203	42.86	B1503	0.0242
Medium	SGFSQPVIF	2	1	1	P98082		0	4.35985e+06	0.02	0.1317	2.32761	2	981.504	-0.348029	86.2297	0	C1203	44.44	C1203	0.3397
Medium	FSVITVIGAL	6	1	1	Q53R12		0	1.74066e+07	0.02	0.1306	2.32039	2	1019.61	-0.696046	79.7412	0	C1203	57.14	A6802	3.8071
Medium	RQFmAETQF	2	1	1	Q14444	M4(Oxidation)	0	2.54718e+06	0.02	0.1339	2.30422	2	1173.53	-0.799859	53.9128	0	C1203	33.33	B1503	0.0046
Medium	RKPEGGPSF	3	1	1	P59923		0	836497	0.02	0.1352	2.24869	2	974.505	-0.168986	31.7714	0	C1203	33.33	B1503	0.0773
Medium	VAGSAEANAF	1	1	1	P22695		0	1.16246e+06	0.02	0.1361	2.17479	2	936.442	-0.266082	29.7919	0	C1203	57.14	B1503	4.0656
Medium	HSAAPSPQV	3	1	1	Q92614		0	2.96255e+06	0.02	0.1306	2.12958	2	893.448	0.235274	34.7258	0	C1203	70.37	A6802	0.0701
Medium	DVAEVLWEI	1	1	1	Q9Y5L0		0	1.58037e+06	0.02	0.1292	2.06112	2	1073.55	0.0259888	106.57	0	C1203	40.74	A6802	0.0192
Medium	TTFEYPNTI	4	1	1	P02749		0	3.18741e+06	0.02	0.1313	2.01878	2	1085.51	-0.609365	73.9229	0	C1203	74.07	A6802	0.0139
Medium	AAAHFYFEL	2	1	1	A7E2V4		0	3.71589e+06	0.02	0.135	2.01105	2	1068.51	-0.686509	82.4433	0	C1203	85.19	C1203	0.5086
Medium	HQYPGRGVY	1	1	1	Q9H3P7		0	465970	0.02	0.1345	1.88509	2	1076.53	-0.975967	34.8524	0	C1203	51.85	B1503	0.0011
Medium	RAYPAAITI	1	1	1	O95071		0	1.94159e+07	0.02	0.1341	1.79497	2	975.562	-0.676804	63.629	0	C1203	85.19	C1203	0.0033
Medium	EISHVLNFL	1	1	1	Q8TED0		0	1.2252e+06	0.02	0.1322	1.79302	2	1071.58	-0.399371	83.9596	0	C1203	40.74	A6802	0.0713
Medium	NKAEVHESY	2	1	1	Q15067		0	325822	0.02	0.1356	1.64106	2	1076.5	-0.417613	25.9885	0	C1203	44.44	B1503	0.1677
Medium	ETIGVVHLV	2	1	1	Q63HN8		0	2.33276e+07	0.02	0.135	1.61137	2	966.561	-0.783716	70.6785	0	C1203	74.07	A6802	0.002
Medium	QKKDTGHVY	1	1	1	Q15208		0	169583	0.02	0.1356	1.43276	2	1075.55	-0.0792017	15.4384	0	C1203	44.44	B1503	0.0992
Medium	KASEKILQV	1	1	1	Q13428		0	1.41712e+06	0.021	0.1385	2.48098	2	1015.61	-0.720844	43.3983	0	C1203	88.89	C1203	0.1474
Medium	EVFPVSKTL	1	1	1	Q5UIP0		0	1.23141e+06	0.021	0.1392	2.23414	2	1019.58	-1.04245	64.8369	0	C1203	55.56	A6802	0.0359
Medium	AGHLSTAQY	1	1	1	Q04637		0	6.0654e+06	0.021	0.141	2.16749	2	947.458	-0.477171	36.3191	0	C1203	40.74	B1503	0.6529
Medium	SVFPGARLL	3	1	1	Q86X55		0	1.93277e+06	0.021	0.1387	2.0369	2	959.567	-0.341961	76.0416	0	C1203	51.85	C1203	0.0065
Medium	ETAKATPRL	1	1	1	Q13428		0	5.1368e+06	0.021	0.1407	1.91094	2	986.562	-0.615072	31.5525	0	C1203	70.37	A6802	0.0701
Medium	ETAPDSYKV	6	1	1	Q14244		0	1.91932e+07	0.021	0.1378	1.81179	2	1009.48	-0.978408	42.534	0	C1203	77.78	A6802	0.0058
Medium	HQNSNIRTY	1	1	1	Q7RTS9		0	154862	0.021	0.1411	0.924331	2	1132.55	-0.580678	26.2052	0	C1203	51.85	B1503	0.0039
Medium	GKVGPmIGQY	1	1	1	Q9Y484	M6(Oxidation)	0	814931	0.022	0.1424	3.16151	2	1065.53	-4.99737	49.6619	0	C1203	37.14	B1503	0.6984
Medium	NALDIIFQT	1	1	1	P09871		0	1.77618e+06	0.022	0.1441	2.70462	2	1034.55	-0.282344	84.4814	0	C1203	44.44	A6802	0.6544
Medium	TLAENCIDQV	1	1	1	Q6P3X3		0	1.58739e+06	0.022	0.1462	2.30187	2	1105.52	-1.76175	97.0109	0	C1203	22.86	A6802	1.8738
Medium	AQDEHLITF	3	1	1	O75643		0	3.92391e+06	0.022	0.1453	2.2046	2	1073.53	-0.634364	67.1945	0	C1203	44.44	B1503	0.0106
Medium	AQVPKSSAL	2	1	1	Q96F05		0	1.64202e+06	0.022	0.1428	2.17796	2	900.515	-0.147908	39.2176	0	C1203	48.15	B1503	0.0344
Medium	YTTDRVmTV	2	2	2	Q13547;Q92769	M7(Oxidation)	0	956148	0.022	0.1453	2.14941	2	1101.52	-2.16425	41.0749	0	C1203	81.48	A6802	0.0094
Medium	ETANKIFmV	4	1	1	Q14680	M8(Oxidation)	0	1.26674e+07	0.022	0.1458	2.11918	2	1068.54	-0.790315	62.3559	0	C1203	74.07	A6802	0.005
Medium	ITAPPSRVL	1	1	1	O00767		0	2.24301e+06	0.022	0.1442	2.09571	2	953.577	-0.665105	53.8662	0	C1203	85.19	C1203	0.0544
Medium	AAFQEAFYV	6	1	1	Q9UNN5		0	5.41433e+06	0.022	0.1435	2.09232	2	1045.5	0.104961	85.3249	0	C1203	81.48	A6802	0.2842
Medium	SAAFIISYV	5	1	1	Q8N682		0	1.34446e+06	0.022	0.1447	1.71356	2	970.524	-0.230576	93.4993	0	C1203	81.48	A6802	0.0174
Medium	ETANFYQKA	1	1	1	Q5VW32		0	1.48268e+06	0.023	0.1481	2.1652	2	1071.51	-0.488969	42.0283	0	C1203	33.33	A6802	0.0814
Medium	EAFYNVITV	3	1	1	Q5JPI3		0	3.23741e+06	0.023	0.1506	1.94269	2	1055.54	-1.04293	89.0521	0	C1203	88.89	A6802	0.032
Medium	YSAAILEYL	1	2	2	Q71UI9;P0C0S5		0	1.27747e+06	0.023	0.1494	1.55069	2	1042.55	-0.0993194	98.7731	0	C1203	74.07	A6802	0.0801
Medium	GAYGEPRVK	2	1	1	Q15392		0	891499	0.023	0.1488	1.44091	2	976.521	-0.309003	29.8724	0	C1203	55.56	C1203	5.8378
Medium	KKFASFNAY	2	1	1	Q969S3		0	2.10831e+06	0.024	0.1515	2.55969	2	1075.56	-0.648238	47.6011	0	C1203	40.74	B1503	0.0068
Medium	KKGGPGVAL	1	1	1	P08047		0	1.28693e+06	0.024	0.1533	2.47653	2	826.515	0.00322552	32.9101	0	C1203	44.44	B1503	0.4614
Medium	GKKGPQSLF	1	1	1	P46087		0	3.04876e+06	0.024	0.1532	2.33204	2	961.547	-0.0363084	43.49	0	C1203	33.33	B1503	0.2266
Medium	ETITGQHPA	1	1	1	Q8WTW3		0	680930	0.024	0.1547	2.0985	2	953.468	-1.00821	30.3662	0	C1203	29.63	A6802	0.1236
Medium	EVSSSFDHV	8	1	1	Q9Y6C9		0	3.41521e+06	0.024	0.1528	2.08586	2	1006.45	-0.578487	47.7697	0	C1203	44.44	A6802	0.0279
Medium	TTTHITKTV	2	2	2	O43491;Q9Y2J2		0	1.16827e+06	0.024	0.1534	2.04269	2	1001.56	-0.429242	28.5754	0	C1203	74.07	A6802	0.0595
Medium	SVIEQIVYV	1	1	1	Q00653		0	1.15549e+06	0.024	0.1529	2.01493	2	1049.59	-0.422478	88.1512	0	C1203	48.15	A6802	0.0039
Medium	FIASVNTLV	1	1	1	P53367		0	999242	0.024	0.1558	1.87617	2	963.551	-0.369007	86.8842	0	C1203	48.15	A6802	0.0202
Medium	EAADVLIKA	2	1	1	Q7Z6Z7		0	1.3018e+07	0.024	0.1535	1.22683	2	929.53	-0.679538	55.0101	0	C1203	48.15	A6802	0.0313
Medium	YAFPVSNNL	1	1	1	Q13614		0	1.27073e+06	0.025	0.1582	2.4881	2	1024.51	-0.513765	78.2468	0	C1203	88.89	C1203	0.0024
Medium	QKYISNPLL	4	1	1	Q9BWV7		0	6.4761e+06	0.025	0.1593	2.45159	2	1075.61	-2.1374	51.2822	0	C1203	40.74	B1503	1.119
Medium	QSRLIFTY	3	1	1	Q96Q89		0	1.24104e+06	0.025	0.1614	2.28389	2	1027.56	-0.668787	65.1773	0	C1203	60	B1503	4.4574
Medium	VMAPRTVLL	2	10	10	P01889;P30460;P30462;Q95365;P30475;P30480;P30486;Q29836;Q31612;Q31610		0	3.80562e+07	0.025	0.1615	2.22137	2	999.6	-1.68361	69.5819	0	C1203	55.56	C1203	0.1791
Medium	NTHEFVNLV	1	1	1	O75436		0	5.50376e+06	0.025	0.1596	2.20897	2	1072.54	-0.624493	66.3148	0	C1203	74.07	A6802	0.0076
Medium	TSSRVIQSV	1	1	1	O75061		0	1.91563e+06	0.025	0.16	2.1426	2	976.542	-0.248375	40.702	0	C1203	74.07	A6802	0.2615
Medium	GQVKSIVF	3	1	1	Q8NDG6		0	1.14517e+06	0.025	0.1574	2.14011	2	877.514	-0.432763	58.6302	0	C1203	30	B1503	0.3142
Medium	RQFSTPFQL	1	1	1	Q7Z3K3		0	840545	0.025	0.1599	2.11396	2	1123.59	-0.85683	74.961	0	C1203	48.15	B1503	0.0399
Medium	LAFEGPILL	1	1	1	O60281		0	424043	0.025	0.1582	2.097	2	972.576	-0.478042	103.107	0	C1203	88.89	C1203	0.0088
Medium	SNSDVIIYV	1	1	1	P38606		0	7.08988e+06	0.025	0.1576	2.02164	2	1009.52	-0.195415	79.154	0	C1203	51.85	A6802	0.2092
Medium	HVFDHPWET	1	1	1	Q9Y3B1		0	1.2825e+06	0.025	0.1573	2.00853	2	1167.52	-0.561478	55.3878	0	C1203	14.81	A6802	0.0856
Medium	VQAAKKEF	1	1	1	O00139		0	939323	0.025	0.1579	1.88515	2	920.52	-0.170855	32.263	0	C1203	40	B1503	1.1125
Medium	YTTDFIFNL	1	1	1	P08237		0	1.87722e+06	0.025	0.1616	1.72047	2	1133.55	0.0510787	104.074	0	C1203	77.78	A6802	0.0178
Medium	MTNDKTAKV	1	1	1	P46013		0	270260	0.025	0.1615	1.40661	2	1007.52	-0.455588	20.3511	0	C1203	70.37	A6802	0.0173
Medium	SKKIDRHmY	1	1	1	P84098	M8(Oxidation)	0	151630	0.025	0.1597	1.13902	2	1193.61	-0.145526	15.5374	0	C1203	37.04	B1503	0.5279
Medium	GKNFSKNIF	2	1	1	Q6P1J9		0	1.69261e+06	0.026	0.1635	2.54714	2	1054.57	-0.936024	47.5242	0	C1203	29.63	B1503	0.2358
Medium	ELADIKQAYL	1	1	1	Q8WXX5		0	1.20693e+06	0.026	0.1642	2.13074	2	1163.63	-0.67108	68.3231	0	C1203	34.29	A6802	0.2007
Medium	EVPDIEPAAL	2	1	1	Q9H211		0	2.55424e+06	0.026	0.1643	2.01503	2	1053.55	-0.597415	79.2373	0	C1203	40	A6802	0.2389
Medium	AAFHEEFVV	2	1	1	P51114		0	5.28773e+07	0.026	0.1647	1.87124	2	1048.51	-0.637503	68.9333	0	C1203	85.19	C1203	1.0782
Medium	EVFHFFNVL	1	1	1	Q56P03		0	1.92416e+06	0.026	0.1647	1.62892	2	1151.59	0.190472	96.6935	0	C1203	44.44	A6802	0.1448
Medium	GKYGEGAKQETF	1	1	1	P78383		0	605116	0.027	0.1714	2.56225	3	1314.63	-0.139542	35.587	0		0	B1503	0.9609
Medium	AAFPLPVVV	2	1	1	Q9H6Y7		0	559958	0.027	0.1701	2.48255	2	912.555	-0.362746	101.014	0	C1203	100	C1203	0.0109
Medium	EIIQRIENV	2	1	1	Q9H074		0	2.53385e+06	0.027	0.1709	2.47021	2	1113.62	-2.77002	60.6523	0	C1203	40.74	A6802	0.0496
Medium	ETHNFPTGV	3	1	1	O15067		0	2.06009e+06	0.027	0.1699	2.43791	2	1001.47	-1.02084	50.1156	0	C1203	70.37	A6802	0.0097
Medium	MRRNGGGNF	1	1	1	Q9P272		0	3.55628e+06	0.027	0.1711	2.02327	2	1008.48	-0.823167	63.7517	0	C1203	29.63	B1503	0.2228
Medium	GKTVQIPVY	2	1	1	Q9BZX2		0	1.05759e+06	0.027	0.1716	1.98379	2	1004.58	-0.708233	60.2562	0	C1203	44.44	B1503	0.2291
Medium	YAYPGVLLI	1	1	1	Q99798		0	1.35031e+06	0.027	0.1664	1.82818	2	1008.58	-0.854847	100.593	0	C1203	88.89	C1203	0.0026
Medium	NTYGFPIIF	2	1	1	P11498		0	1.83141e+06	0.027	0.168	1.78237	2	1071.55	-0.0376846	106.339	0	C1203	74.07	C1203	0.073
Medium	HKFSSAIGL	4	1	1	O15427		0	4.85266e+06	0.028	0.1754	2.53875	2	959.529	-1.65375	51.6393	0	C1203	48.15	B1503	0.3735
Medium	EAAELMQQV	1	1	1	Q15691		0	885216	0.028	0.177	2.52692	2	1018.49	-1.15627	64.3473	0	C1203	81.48	A6802	0.0196
Medium	RKLTPGEVY	2	1	1	Q15818		0	1.52792e+06	0.028	0.1742	2.47235	2	1062.59	-1.70006	41.0525	0	C1203	40.74	B1503	0.0182
Medium	SRDGLITTVY	1	1	1	Q9Y2H9		0	6.19296e+06	0.028	0.1727	2.3554	2	1124.59	-0.650573	36.8993	0	C1203	37.14	B1503	0.5004
Medium	GKAFSRSSY	1	3	3	Q8N9K5;Q7L945;P17097		0	652793	0.028	0.1727	2.1397	2	1002.5	-0.729125	30.1579	0	C1203	40.74	B1503	0.1169
Medium	RSLLLLSAF	1	1	1	P50454		0	1.01912e+06	0.028	0.1747	2.12615	2	1019.62	-0.0969739	91.162	0	C1203	59.26	B1503	1.039
Medium	FASEYPLIL	4	1	1	Q9UPR0		0	2.7632e+06	0.028	0.1747	1.98598	2	1052.57	-0.328466	97.1775	0	C1203	92.59	C1203	0.0334
Medium	EVADFLIKA	7	2	2	Q8IWZ3;O75179		0	2.3409e+07	0.028	0.1755	1.96677	2	1005.56	-0.495788	74.0605	0	C1203	11.11	A6802	0.0079
Medium	NAMDVVVQF	2	1	1	O95870		0	1.39772e+06	0.028	0.1728	1.83677	2	1022.5	-0.293676	87.0618	0	C1203	77.78	C1203	0.0706
Medium	IATEIILEI	2	1	1	P42892		0	9.4901e+06	0.028	0.1755	1.82547	2	1014.61	-0.470808	98.9553	0	C1203	81.48	C1203	0.142
Medium	QTYFFPIHL	1	1	1	Q9NVH1		0	499397	0.028	0.1747	1.82248	2	1165.6	-0.653925	93.8117	0	C1203	77.78	A6802	0.0645
Medium	KKFESPNIL	2	1	1	Q8NB16		0	7.39265e+06	0.029	0.1813	2.52418	2	1075.61	-1.92902	51.539	0	C1203	48.15	B1503	0.0999
Medium	KKPDLPQTNF	1	1	1	Q13356		0	1.70642e+06	0.029	0.1788	2.32907	2	1187.64	0.876218	48.6487	0	C1203	34.29	B1503	1.0526
Medium	ETFSQHTFL	1	2	2	Q5SR56;Q5VZR4		0	3.11338e+06	0.029	0.1823	2.13581	2	1109.53	-0.0546669	65.4946	0	C1203	74.07	A6802	0.0382
Medium	ITAPIEAQV	1	1	1	P52756		0	2.89757e+06	0.029	0.1832	2.11992	2	941.53	-0.336128	67.5496	0	C1203	77.78	A6802	0.021
Medium	TITDIISAL	1	2	2	P42229;P51692		0	1.625e+06	0.029	0.1809	1.93029	2	946.545	-0.259486	99.0916	0	C1203	44.44	A6802	0.0396
Medium	RAAEFIKNY	1	1	1	Q5XG87		0	914636	0.029	0.1788	1.81921	2	1111.59	-0.756264	44.8521	0	C1203	88.89	C1203	0.0378
Medium	SASPIFTHV	2	1	1	Q9HCG8		0	2.18638e+06	0.03	0.1859	2.4047	2	958.498	-1.05761	60.1234	0	C1203	85.19	A6802	0.0323
Medium	ESGDVKATV	1	1	1	Q9H0A8		0	934723	0.03	0.187	2.18712	2	905.457	-0.264337	32.4671	0	C1203	74.07	A6802	0.1373
Medium	DAVTVVLYNV	2	1	1	P48764		0	1.84986e+06	0.03	0.1849	1.79902	2	1092.59	-0.481536	99.31	0	C1203	51.43	A6802	1.433
Medium	ETIRNYAQV	3	1	1	Q9Y6E2		0	1.06444e+07	0.03	0.1859	1.75867	2	1093.56	-2.15297	49.7329	0	C1203	66.67	A6802	0.0208
Medium	HTALNTHSV	2	1	1	Q14690		0	1.71002e+06	0.03	0.1862	1.74957	2	979.495	-0.933946	30.3239	0	C1203	70.37	A6802	0.0096
Medium	MTEEQRRQF	1	1	1	Q8NFP9		0	349491	0.03	0.1871	1.45744	3	1224.58	-2.5396	23.678	0	C1203	66.67	C1203	1.0762
Medium	EVSKIIKRA	1	1	1	O60502		0	470456	0.03	0.1877	1.31813	2	1043.66	-0.29066	29.5335	0	C1203	11.11	A6802	0.5574
Medium	KSLTYDEVI	1	1	1	Q16539		0	1.64527e+06	0.03	0.1839	1.26492	2	1067.56	-1.04227	102.913	0	C1203	62.96	C1203	5.8955
Medium	EAAAKVKEF	1	1	1	Q8IVF2		0	2.03872e+06	0.031	0.1936	2.64482	2	992.541	-0.241951	51.0242	0	C1203	81.48	C1203	1.1872
Medium	EAVAVIENI	1	1	1	Q9Y2L8		0	1.74198e+06	0.031	0.1893	2.53803	2	957.525	0.0666492	76.6675	0	C1203	70.37	A6802	0.0587
Medium	AAAFQLASF	1	1	1	Q9BSN7		0	406516	0.031	0.1936	2.19437	2	925.473	-4.69381	34.1681	0	C1203	74.07	C1203	0.2155
Medium	EAAAVRALV	2	1	1	P54802		0	1.66778e+06	0.031	0.1928	2.17876	2	899.53	-1.17563	54.0147	0	C1203	77.78	A6802	0.0159
Medium	GKAAAAVAF	2	1	1	Q8NEB5		0	830641	0.031	0.1903	2.17231	2	805.457	-0.0865315	46.815	0	C1203	37.04	B1503	0.0233
Medium	NISQVIAVV	2	1	1	P24928		0	2.63989e+06	0.031	0.1891	2.10295	2	942.561	-0.609408	83.3598	0	C1203	48.15	A6802	0.1287
Medium	HSAEILAEI	1	1	1	Q6FI81		0	1.54879e+08	0.031	0.1936	2.0814	2	982.521	0.499045	66.9108	0	C1203	70.37	A6802	0.018
Medium	VTYGFPImL	1	1	1	P51798	M8(Oxidation)	0	1.16022e+06	0.031	0.1888	2.04476	2	1056.54	-0.550874	100.349	0	C1203	85.19	C1203	0.0412
Medium	HQYTGSAL	1	1	1	Q8IWV8		0	1.59787e+06	0.031	0.1938	1.9748	2	876.421	0.0534065	36.7068	0	C1203	36.67	B1503	0.4372
Medium	RQIIAVVL	1	1	1	Q9BUV8		0	2.61174e+06	0.031	0.1935	1.93156	2	911.603	-0.296342	73.9191	0	C1203	40	B1503	0.8097
Medium	TQFGGKRPF	1	1	1	P25789		0	959950	0.031	0.1904	1.53184	2	1037.55	-0.902016	44.0938	0	C1203	40.74	B1503	0.0064
Medium	GKTIQSITF	1	3	3	Q8TD26;Q9P2D1;Q3L8U1		0	1.11343e+06	0.032	0.196	2.36892	2	994.557	-0.0623806	61.4184	0	C1203	37.04	B1503	0.1695
Medium	AITDLLLGL	1	1	1	P25021		0	1.39965e+06	0.032	0.1967	2.25927	2	928.571	-0.409031	104.722	0	C1203	48.15	A6802	1.2995
Medium	VAYSHPTTV	1	1	1	Q96KR1		0	379884	0.032	0.1983	2.22662	2	974.493	-1.56898	41.1008	0	C1203	92.59	C1203	0.0037
Medium	YQKQPTIF	2	1	1	P62280		0	0	0.032	0.198	2.16969	2	1024.54	-2.5422	55.4361	0	C1203	43.33	B1503	0.1264
Medium	ETAKLIEKL	3	1	1	P13639		0	1.0802e+08	0.032	0.1974	2.04655	2	1044.63	-1.81112	51.0447	0	C1203	74.07	A6802	0.0498
Medium	RQYGTISH	1	1	1	Q06481		0	709492	0.032	0.1946	1.93955	2	961.485	-0.178323	26.5743	0	C1203	0	B1503	0.8309
Medium	AQFLIQEEF	1	1	1	Q9UHP3		0	561789	0.032	0.1947	1.87667	2	1124.56	-0.540827	89.374	0	C1203	40.74	B1503	0.0289
Medium	GKAFSQSAY	1	3	3	Q6ZN57;O14709;Q9NQZ8		0	688870	0.033	0.204	2.42697	2	958.463	-0.343558	38.625	0	C1203	40.74	B1503	0.1011
Medium	DAFPKRIL	3	1	1	O14628		0	1.93277e+06	0.033	0.2028	2.28307	2	959.567	-0.15114	75.4627	0	C1203	83.33	C1203	5.4072
Medium	FTAGIVEAVL	1	1	1	Q8IUR0		0	8.07114e+06	0.033	0.2018	2.10223	2	1019.58	-0.573356	94.5536	0	C1203	60	A6802	0.2378
Medium	AAIDHQIEV	1	1	1	Q9Y485		0	3.59876e+06	0.033	0.1994	2.00108	2	995.515	-0.499221	52.3793	0	C1203	88.89	C1203	0.0259
Medium	NAYTGIVLL	1	1	1	Q969H6		0	1.7077e+06	0.033	0.2013	1.95881	2	963.551	-0.168596	91.8661	0	C1203	85.19	C1203	0.0275
Medium	ETNAVHVNV	2	1	1	Q2LD37		0	892920	0.033	0.2007	1.73967	2	982.495	-0.356902	45.2267	0	C1203	70.37	A6802	0.0053
Medium	KKAQAQPVm	1	1	1	P24539	M9(Oxidation)	0	114776	0.033	0.2016	1.68405	2	1016.56	-0.313588	18.6643	0	C1203	37.04	B1503	0.1202
Medium	SQRDGDASL	2	1	1	Q9NQW6		0	758062	0.034	0.2069	2.10491	2	948.438	-0.325299	28.3222	0	C1203	40.74	B1503	0.1036
Medium	EIAAVIETV	2	1	1	Q7Z4G1		0	3.66723e+07	0.034	0.2066	2.0553	2	944.529	-0.890356	77.926	0	C1203	48.15	A6802	0.0047
Medium	SKLDRNTSF	1	1	1	Q9UJF2		0	311444	0.034	0.2102	1.80529	2	1067.55	-1.04792	35.5447	0	C1203	33.33	B1503	0.0146
Medium	EVFPTQHVV	1	1	1	Q9HCG7		0	0	0.034	0.2058	1.80098	2	1055.55	-0.58936	58.4754	0	C1203	51.85	A6802	0.0087
Medium	EVGPKFRGV	1	1	1	Q9Y312		0	2.89721e+06	0.034	0.2082	1.76991	2	988.557	-0.575521	44.1493	0	C1203	48.15	A6802	0.346
Medium	YKIDGSLEV	1	1	1	Q9NVM9		0	1.26497e+06	0.035	0.2108	2.45201	2	1023.53	-1.00215	63.5769	0	C1203	51.85	B1503	0.459
Medium	EVVSLLEAL	1	1	1	Q96PX1		0	638329	0.035	0.2119	2.22305	2	972.561	-0.539561	91.5394	0	C1203	40.74	A6802	0.0542
Medium	AKGAPTSTVY	1	1	1	Q8IW00		0	861112	0.035	0.2106	2.1802	2	994.52	-0.478865	43.0941	0	C1203	45.71	B1503	0.052
Medium	ESANLDFmL	2	1	1	O14545	M8(Oxidation)	0	1.83894e+06	0.035	0.2129	2.08166	2	1055.47	-0.65902	83.8192	0	C1203	70.37	A6802	0.2151
Medium	EVIDKYTAV	1	1	1	O60870		0	1.57612e+06	0.035	0.2106	1.81289	2	1037.55	-0.542095	53.8522	0	C1203	40.74	A6802	0.0043
Medium	FGFHKPKmY	1	1	1	Q9NP50	M8(Oxidation)	0	2.14149e+06	0.036	0.2167	2.24587	2	1170.58	-0.662159	43.3431	0	C1203	51.85	C1203	0.1929
Medium	HQmTPSSSY	1	1	1	Q93074	M3(Oxidation)	0	515144	0.036	0.217	1.81072	2	1053.43	-1.29053	30.2256	0	C1203	37.04	B1503	0.002
Medium	DVTAIIFVV	3	2	2	Q5JWF2;P63092		0	3.77567e+07	0.036	0.2157	1.65945	2	976.571	-0.326427	107.845	0	C1203	44.44	A6802	0.1107
Medium	ESSKVVKKV	1	1	1	Q2NL82		0	869257	0.036	0.2161	1.39734	2	1003.61	-0.607833	18.3351	0	C1203	77.78	A6802	0.4964
Medium	EVYRGKLIEA	2	1	1	P62318		0	1.77407e+06	0.037	0.2245	2.34849	2	1177.66	-0.277788	46.1597	0	C1203	8.57	A6802	0.3445
Medium	TASELIGNEL	1	1	1	Q96QE3		0	3.9659e+06	0.037	0.2237	2.32009	2	1046.54	-0.287509	83.0358	0	C1203	60	A6802	1.1875
Medium	LETYVPSTF	1	1	1	O00591		0	3.18283e+06	0.037	0.2244	2.20499	2	1056.53	1.26769	57.993	0	C1203	37.04	B1503	0.2418
Medium	TTFGSRVNV	2	1	1	Q9P265		0	2.32795e+06	0.037	0.221	2.17607	2	980.514	-2.15063	49.7987	0	C1203	77.78	A6802	0.0068
Medium	QAKRSINEm	1	1	1	Q9ULC6	M9(Oxidation)	0	2.60224e+06	0.037	0.2219	1.98221	2	1092.55	-0.333215	51.7355	0	C1203	74.07	C1203	0.8
Medium	KKLDLISEL	2	1	1	Q2M389		0	1.77682e+06	0.037	0.2213	1.88081	2	1058.64	-1.0036	66.8235	0	C1203	48.15	B1503	0.3895
Medium	NQKEAVAY	1	1	1	Q03518		0	718762	0.038	0.2278	2.16117	2	922.463	-0.224634	32.7492	0	C1203	33.33	B1503	0.557
Medium	VASQLPRIF	1	1	1	P35232		0	2.22778e+06	0.038	0.2281	1.87706	2	1030.6	-0.496665	74.1762	0	C1203	81.48	C1203	0.4084
Medium	NSSPVLSKV	1	1	1	Q9NXE8		0	1.58201e+06	0.039	0.2345	2.12217	2	930.525	-0.340901	46.39	0	C1203	77.78	A6802	0.0394
Medium	HAAKVILQV	1	1	1	Q63HN8		0	2.31431e+06	0.039	0.2294	1.93331	2	978.61	0.897049	49.0005	0	C1203	85.19	A6802	0.0357
Medium	SVYPNGHFV	1	1	1	Q8TF46		0	3.30423e+06	0.039	0.2345	1.73034	2	1019.49	-0.695725	56.0827	0	C1203	48.15	A6802	0.0121
Medium	IQHPSNVL	1	1	1	P14866		0	3.1727e+06	0.04	0.2405	2.40297	2	907.499	-0.202813	45.351	0	C1203	40	B1503	0.9671
Medium	SAHSKVVIF	2	1	1	Q8IX04		0	1.72406e+06	0.04	0.2394	2.26653	2	987.562	-0.0505408	49.0144	0	C1203	77.78	C1203	0.0602
Medium	ETATIITQL	1	1	1	Q6ZU80		0	5.09699e+06	0.04	0.2391	2.26487	2	989.551	-0.56839	77.7679	0	C1203	74.07	A6802	0.007
Medium	ETNLDSLPL	1	1	1	P08670		0	1.42619e+06	0.04	0.2358	2.25748	2	1001.51	-0.37573	81.8115	0	C1203	70.37	A6802	0.5104
Medium	GQKQSTTF	1	1	1	P78344		0	542720	0.04	0.2362	1.93305	2	896.447	-0.203266	27.3586	0	C1203	33.33	B1503	0.2527
Medium	HVNWVVSEL	1	1	1	Q14204		0	2.6598e+06	0.04	0.2385	1.91255	2	1082.56	-0.0438684	75.8384	0	C1203	44.44	A6802	0.115
Medium	SVDSFQIIL	1	1	1	Q5VWP2		0	1.53228e+07	0.041	0.2434	2.21781	2	1021.56	-0.753399	87.6249	0	C1203	44.44	C1203	0.9481
Medium	AKYSTPATL	1	1	1	Q13206		0	2.0549e+07	0.041	0.2417	2.01838	2	951.514	-0.413599	47.6868	0	C1203	55.56	B1503	0.061
Medium	EIHSGLLEV	1	1	1	Q9UQ53		0	2.12082e+06	0.041	0.2409	1.79024	2	996.536	-0.45177	66.8701	0	C1203	48.15	A6802	0.0669
Medium	FVYENPISL	1	1	1	Q6NTF9		0	4.21096e+06	0.042	0.2465	1.71049	2	1081.56	0.200566	87.9344	0	C1203	55.56	C1203	0.002
Medium	DTTTPLKGI	1	1	1	Q9H3P2		0	1.82666e+07	0.043	0.253	2.51509	2	945.526	0.465381	76.5262	0	C1203	62.96	A6802	0.5305
Medium	IQESISQEL	1	1	1	Q9NQ92		0	4.47394e+06	0.043	0.2523	2.33855	2	1046.54	-0.161312	82.7006	0	C1203	44.44	B1503	0.5255
Medium	EVFGLVQQL	1	1	1	O75592		0	1.47623e+06	0.043	0.2516	2.06902	2	1032.57	0.319789	91.467	0	C1203	48.15	A6802	0.0288
Medium	EAVHQTTQV	1	1	1	P53597		0	446659	0.043	0.2528	1.86742	2	1012.51	-0.407511	30.0402	0	C1203	74.07	A6802	0.1036
Medium	TQRTNTAY	1	1	1	O60244		0	417393	0.043	0.252	1.77097	2	954.464	-0.294044	22.7673	0	C1203	30	B1503	0.1914
Medium	FGLITSPLF	1	1	1	Q969S6		0	424448	0.043	0.254	1.69656	2	994.561	-0.248176	102.806	0	C1203	33.33	C1203	1.3779
Medium	LKKDDSVGY	1	1	1	Q8N766		0	657826	0.044	0.2591	2.4802	2	1024.53	-1.84569	30.5491	0	C1203	44.44	B1503	0.1583
Medium	TQRPADVIF	1	1	1	P33993		0	1.86969e+06	0.044	0.2602	2.22851	2	1046.56	-1.68788	61.4858	0	C1203	40.74	B1503	0.0075
Medium	TVADHIQKV	1	1	1	Q9Y678		0	1.43614e+06	0.044	0.2613	2.1289	2	1010.56	-0.771761	36.8001	0	C1203	48.15	A6802	0.0072
Medium	YLmLSFIDF	1	1	1	Q6ZRH7	M3(Oxidation)	0	2.31459e+06	0.044	0.2576	1.95994	2	1164.56	-2.816	101.912	0	C1203	37.04	B1503	1.8133
Medium	FPPGRQVVm	1	1	1	Q9H6R0	M9(Oxidation)	0	2.72544e+06	0.044	0.2594	1.70256	2	1046.54	-3.39473	85.6065	0	C1203	44.44	C1203	1.1585
Medium	QVGPVNENV	1	1	1	Q14966		0	2.29162e+06	0.045	0.266	2.36585	2	955.483	-1.61763	51.1612	0	C1203	44.44	A6802	0.1386
Medium	QAADNmQAIY	1	1	1	Q5SQ64	M6(Oxidation)	0	1.5314e+07	0.045	0.2666	2.08346	2	1140.5	2.80452	57.9632	0	C1203	62.86	B1503	2.8658
Medium	GKGFTRISY	1	1	1	Q9BRR0		0	930337	0.045	0.2664	2.08063	2	1028.55	-0.450943	44.6243	0	C1203	40.74	B1503	0.2148
Medium	RQIPLAVLF	1	1	1	P04920		0	2.30955e+06	0.045	0.2656	2.0099	2	1056.66	-0.404902	89.3547	0	C1203	40.74	B1503	0.0057
Medium	FVQELNKSL	1	1	1	Q14202		0	935055	0.046	0.2711	2.22925	2	1077.59	-0.917038	77.2683	0	C1203	48.15	C1203	0.1836
Medium	NATNLVSSLL	1	1	1	P54829		0	2.21504e+06	0.046	0.2695	2.13494	2	1031.57	0.0954719	72.6235	0	C1203	57.14	A6802	1.8805
Medium	RVPNSVLWL	1	1	1	O15294		0	2.99594e+06	0.046	0.2706	1.72878	2	1083.63	0.14748	81.6363	0	C1203	44.44	C1203	0.8
Medium	HKSPDGRTY	1	1	1	O75400		0	71019.8	0.046	0.2715	1.19373	2	1060.52	0.186902	15.2975	0	C1203	55.56	B1503	0.0347
Medium	GKPTHFTVY	1	1	1	O75369		0	881495	0.047	0.2734	1.90847	2	1049.54	-0.282034	43.124	0	C1203	40.74	B1503	0.1403
Medium	SHKPSGLVm	1	1	1	Q02750	M9(Oxidation)	0	202360	0.047	0.2728	1.67105	2	971.497	-0.832106	27.7536	0	C1203	44.44	B1503	0.3362
Medium	YIVPLVVVY	1	1	1	Q13286		0	444687	0.047	0.2732	1.30508	2	1064.64	-0.215806	104.37	0	C1203	59.26	C1203	0.1125
Medium	VSFPLSSIV	1	1	1	Q5SQN1		0	1.75472e+07	0.048	0.2777	1.9042	2	948.54	-0.401512	100.386	0	C1203	81.48	C1203	0.2883
Medium	VATDFFTVL	1	1	1	O43299		0	1.03416e+06	0.049	0.2814	2.30319	2	1012.53	-1.20614	101.333	0	C1203	85.19	C1203	0.0642
Medium	AAAPHTVSY	1	1	1	O75907		0	272240	0.049	0.2792	2.18053	2	916.452	-0.0143962	38.801	0	C1203	92.59	C1203	0.006
Medium	ESADKFYGV	1	1	1	Q9UQE7		0	5.49143e+06	0.049	0.2825	1.89431	2	1015.47	-0.550996	54.6375	0	C1203	74.07	A6802	0.0065

## Sheet: Statistics
Total_Peptides	Tool	A*68:02	B*15:03	C*12:03
1826	Total Syfpeithi allelecoverage with threshold	0	0	572
	Total Syfpeithi allelecoverage with threshold %	0.0000	0.0000	0.3133
	Total NetMHC allelecoverage with threshold	0	0	0
	Total NetMHC allelecoverage with threshold %	0.0000	0.0000	0.0000
	Total NetMHC allelecoverage with 50nM threshold	0	0	0
	Total NetMHC allelecoverage with 50nM threshold %	0.0000	0.0000	0.0000
	Best Syfpeithi	0	0	1736
	Best Syfpeithi %	0.0000	0.0000	0.9507
	Best NetMHC	0	0	0
	Best NetMHC %	0.0000	0.0000	0.0000
	Best Syfpeithi with threshold	0	0	572
	Best Syfpeithi with threshold %	0.0000	0.0000	0.3133
	Best NetMHC with threshold	0	0	0
	Best NetMHC with threshold %	0.0000	0.0000	0.0000
	Best NetMHC with 50nM threshold	0	0	0
	Best NetMHC with 50nM threshold %	0.0000	0.0000	0.0000
