# Supplementary material for: TAPBPR mediates peptide dissociation from MHC class I using a leucine lever
Source: eLife. 2018 Nov 28;7:e40126. doi: 10.7554/eLife.40126 (PMC6307860; doi:10.7554/eLife.40126)
Supplement: Figure 5—source data 4. [file elife-40126-fig5-data4.xlsx]

## Sheet: Filteredpeptides
A6	Sequence	# PSMs	# Proteins	# Protein Groups	Protein Group Accessions	Modifications	ΔCn	Area	q-Value	PEP	XCorr	Charge	MH+ [Da]	ΔM [ppm]	RT [min]	# Missed Cleavages	best_Syf_Allele	best_Syf_Score	best_NetMHC_Allele_Rank	best_NetMHC_Rank
High	SKLPIGDVATQY	19	1	1	Q99832		0	5.69345e+06	0	3.32568e-09	4.92429	2	1291.69	-0.404895	66.1929	0		0	B1503	1.2346
High	YGYDNVKEY	20	1	1	Q96GN5		0	7.46645e+06	0	1.487e-06	4.29917	2	1150.5	-0.819911	50.3802	0	C1203	59.26	C1203	0.0081
High	IKISEGTGF	12	1	1	Q9Y2R4		0	2.74268e+06	0	7.461e-05	4.13964	2	951.514	-0.498763	56.9322	0	C1203	33.33	B1503	0.0238
High	GQYGNPLNKY	56	1	1	O14672		0	1.19827e+08	0	1.903e-06	4.13728	2	1153.56	-0.656653	52.3594	0	C1203	34.29	B1503	0.0242
High	YKIGDLTGY	38	1	1	Q9NVN8		0	4.57646e+07	0	2.362e-05	4.10401	2	1029.52	-1.27242	66.2414	0	C1203	44.44	B1503	0.0506
High	GKVFATTGY	10	2	2	Q14957;O15399		0	3.01459e+06	0	0.0001506	4.0242	2	943.488	-0.0661919	48.9233	0	C1203	37.04	B1503	0.1564
High	LANGEVRIY	7	1	1	Q8NFJ9		0	3.80074e+06	0	1.414e-05	3.97707	2	1034.56	-0.989842	54.8399	0	C1203	85.19	C1203	0.4983
High	EAFQGTKVFV	20	1	1	P61289		0	8.98537e+06	0	6.166e-05	3.96976	2	1125.59	-0.669916	65.2485	0	C1203	68.57	A6802	0.1825
High	KQFPEVIKY	41	1	1	Q9UIF9		0	2.10627e+07	0	0.0002887	3.92099	2	1151.65	-0.352442	56.8248	0	C1203	55.56	B1503	0.0014
High	YAIDNPLHY	16	1	1	A5YKK6		0	5.12124e+06	0	2.75e-06	3.91832	2	1105.53	-0.776273	68.6411	0	C1203	88.89	C1203	0.0069
High	AKLPFTPLSY	14	1	1	Q9UM00		0	3.06656e+06	0	1.746e-05	3.91092	2	1136.63	-0.218255	80.853	0	C1203	48.57	B1503	0.0699
High	AAASAIKVI	26	1	1	P14902		0	1.66778e+07	0	1.767e-05	3.8962	2	843.53	-0.0575498	54.3215	0	C1203	88.89	C1203	0.427
High	TAADIFKQY	4	1	1	Q8N3U4		0	1.4975e+06	0	6.527e-05	3.89131	2	1056.54	-0.589957	63.6599	0	C1203	85.19	C1203	0.0976
High	VKYIQQENF	18	1	1	Q6PJF5		0	4.22669e+06	0	0.0002204	3.87492	2	1168.6	-0.690355	54.5517	0	C1203	37.04	B1503	0.1248
High	TTYEGIFKTL	21	1	1	Q8WWM7		0	4.05626e+06	0	7.23e-05	3.87213	2	1172.62	-0.626927	77.5355	0	C1203	54.29	A6802	0.1132
High	FQFGSSTTNF	9	1	1	P49790		0	1.17949e+06	0	0.0001176	3.82959	2	1135.5	-0.502762	78.1086	0	C1203	45.71	B1503	0.0697
High	TKFETEQAL	13	2	2	Q04695;P08727		0	4.92296e+06	0	0.0001999	3.80219	2	1066.54	-0.467001	48.9285	0	C1203	44.44	B1503	0.5272
High	GKIGTVmTF	20	1	1	P30046	M7(Oxidation)	0	4.78619e+06	0	0.001113	3.79966	2	969.507	-0.507195	56.9981	0	C1203	40.74	B1503	0.013
High	GKLPAGGVLY	7	1	1	P48634		0	8.00064e+06	0	0.0001007	3.78754	2	974.567	-0.426221	59.9356	0	C1203	34.29	B1503	0.1953
High	AKWNPTAGVAF	23	1	1	P19387		0	6.60079e+06	0	2.451e-06	3.78688	2	1161.6	-0.237002	70.911	0		0	B1503	0.5535
High	SAAEEVKTY	8	1	1	Q5JRA6		0	3.13854e+06	0	3.259e-05	3.78113	2	997.483	-0.317097	36.2607	0	C1203	92.59	C1203	0.1392
High	KLFGSTSSF	35	1	1	P08174		0	3.20532e+07	0	3.887e-05	3.77534	2	973.499	0.238117	61.9372	0	C1203	37.04	B1503	0.0127
High	SAVNIIRTF	10	1	1	P29728		0	2.53038e+06	0	8.868e-05	3.77202	2	1020.58	-0.393646	70.4157	0	C1203	77.78	C1203	0.0226
High	GQFGTINNF	18	1	1	Q14457		0	6.87909e+06	0	0.0001721	3.76942	2	997.474	-0.19241	73.1417	0	C1203	40.74	B1503	0.0065
High	FVNDIFERI	174	14	14	P33778;P62807;P58876;Q93079;P06899;O60814;Q99880;Q99879;Q99877;P23527;Q16778;Q5QNW6;Q8N257;P57053		0	2.57103e+08	0	9.378e-05	3.76581	2	1152.6	-0.579318	84.4434	0	C1203	37.04	A6802	0.0163
High	IKISNPTEF	20	1	1	Q9BXS6		0	1.08321e+07	0	5.917e-05	3.7576	2	1048.57	-0.884494	62.3498	0	C1203	40.74	B1503	0.0114
High	AKVDLNSNGF	7	1	1	P13797		0	2.51566e+06	0	2.365e-05	3.75686	2	1064.54	-0.56802	53.5805	0	C1203	37.14	B1503	0.644
High	AKVSGGPSL	9	1	1	Q9Y262		0	2.85098e+06	0	0.0002546	3.74598	2	815.462	-0.131911	38.5167	0	C1203	44.44	B1503	0.1298
High	NAYDFImKL	22	1	1	P08183	M7(Oxidation)	0	5.06739e+06	0	9.318e-06	3.739	2	1130.55	-0.112388	80.5951	0	C1203	85.19	C1203	0.0092
High	KAFQKIVVL	69	2	2	Q7L1Q6;Q9Y6E2		0	7.55419e+07	0	0.0009338	3.70345	2	1045.68	-0.189312	59.4589	0	C1203	88.89	C1203	0.0077
High	VKVPTTLAEY	8	2	2	P49427;Q712K3		0	1.26374e+06	0	0.0003434	3.68838	2	1120.62	-1.27662	64.025	0	C1203	34.29	B1503	0.232
High	TKYLENQAF	19	1	1	Q99661		0	4.4958e+06	0	2.867e-05	3.6876	2	1113.56	-0.976346	54.7747	0	C1203	33.33	B1503	0.0182
High	KKPITTGGVTY	24	1	1	Q14192		0	6.34098e+06	0	2.48e-05	3.68663	2	1164.66	-0.682325	38.7217	0		0	B1503	0.9535
High	AAADSIKIW	16	1	1	Q9UNX4		0	4.13951e+06	0	2.242e-05	3.68505	2	974.531	0.516344	69.1081	0	C1203	55.56	C1203	1.5532
High	SKLSFSQVF	19	1	1	Q9UJX4		0	4.79493e+06	0	0.0001645	3.67349	2	1042.56	-0.586402	73.9019	0	C1203	37.04	B1503	0.031
High	AKYESQTSF	17	1	1	Q9P0U4		0	4.74087e+06	0	1.894e-05	3.67102	2	1060.49	-0.264976	40.5558	0	C1203	40.74	B1503	0.0018
High	YKAAAGEDY	28	1	1	P23381		0	2.56025e+07	0	5.796e-05	3.66067	2	987.441	-0.567686	35.0867	0	C1203	44.44	B1503	0.2533
High	GKLHPSSSL	13	1	1	A5PLN9		0	3.25395e+06	0	0.001014	3.65899	2	925.51	-0.342558	31.3081	0	C1203	37.04	B1503	0.7917
High	KSKDFVQVm	60	1	1	P78527	M9(Oxidation)	0	5.17956e+06	0	8.137e-05	3.64286	2	1097.57	-0.713538	40.6682	0	C1203	70.37	C1203	0.0946
High	GKYGTLQEF	25	1	1	O75182		0	1.49688e+07	0	0.0009098	3.63494	2	1042.52	-1.04228	57.6066	0	C1203	40.74	B1503	0.0148
High	ALIEFIRSEY	16	1	1	P26639		0	2.74316e+06	0	4.738e-06	3.62417	2	1240.66	0.108758	81.4217	0	C1203	31.43	B1503	1.0203
High	VKLPSGEDY	30	1	1	Q9Y2Z0		0	2.28822e+07	0	0.0009682	3.6167	2	1007.5	-0.120337	51.9308	0	C1203	48.15	B1503	0.276
High	AAANAIRVY	10	1	1	Q9NRK6		0	2.67716e+06	0	5.602e-05	3.60835	2	948.526	-0.526012	49.1065	0	C1203	92.59	B1503	0.0849
High	HKFPDEDSY	50	1	1	Q6VY07		0	1.43037e+07	0	0.0001816	3.59743	2	1137.48	-0.727028	41.8299	0	C1203	48.15	B1503	0.1563
High	ETADVIAKVAF	5	1	1	O43617		0	1.06458e+06	0	4.473e-05	3.59059	2	1163.63	0.255875	74.3758	0		0	A6802	1.3198
High	ETVTATATSQV	10	1	1	Q9H4A3		0	3.96551e+06	0	0.0002381	3.58809	2	1107.55	0.488487	48.7809	0		0	A6802	0.5902
High	IATSQNRIY	9	1	1	Q99623		0	3.04692e+06	0	0.001528	3.58238	2	1065.57	-1.01988	42.7025	0	C1203	81.48	B1503	1.1557
High	VKVIQQESY	22	1	1	P60228		0	1.7686e+07	0	0.0005373	3.57874	2	1093.59	-1.37477	45.3378	0	C1203	40.74	B1503	0.1997
High	VKVDELSLY	9	1	1	Q9BUR5		0	2.08716e+06	0	0.0003528	3.57519	2	1065.58	-0.91843	70.0556	0	C1203	44.44	B1503	0.085
High	IKENPSSQY	11	1	1	O75496		0	3.13565e+06	0	2.029e-05	3.57507	2	1065.52	-0.77899	33.4186	0	C1203	37.04	B1503	0.2086
High	IQKAVSEGY	8	1	1	P32320		0	4.46949e+06	0	3.78e-05	3.56742	2	994.52	-0.29475	36.4772	0	C1203	37.04	B1503	0.0187
High	AKKISQLGY	15	1	1	P26196		0	3.4079e+06	0	0.001228	3.56644	2	1007.59	-0.802165	38.6654	0	C1203	44.44	B1503	0.2744
High	FSMYKPITY	7	1	1	Q68CL5		0	1.79191e+06	0	1.485e-05	3.55686	2	1149.56	-0.15348	70.4291	0	C1203	81.48	C1203	0.0087
High	GQYSTGKTSF	24	1	1	Q9NZN4		0	9.05618e+06	0	1.008e-05	3.55393	2	1075.5	-0.748513	40.4895	0	C1203	34.29	B1503	0.0117
High	YQADIERmY	43	1	1	O95573	M8(Oxidation)	0	6.72961e+06	0	1.305e-05	3.54669	2	1204.53	0.798069	48.8879	0	C1203	51.85	B1503	0.0096
High	QQFLIQQQY	8	1	1	Q6Y7W6		0	2.15319e+06	0	7.06e-06	3.54443	2	1195.61	-0.492092	72.4101	0	C1203	40.74	B1503	0.0189
High	ILGPPGSVY	25	3	3	P51965;Q96LR5;Q969T4		0	1.44823e+07	0	0.0007387	3.54378	2	902.498	-0.151608	71.7743	0	C1203	48.15	B1503	0.0572
High	YAYDGKDYIAL	27	17	17	P01892;P30447;P05534;P10316;P01889;P30460;Q04826;P30479;P30480;P30486;P18464;P30490;P30498;Q31610;P30499;P04222;P17693		0	1.61657e+07	0	7.111e-07	3.54257	2	1291.62	-0.46504	72.2888	0		0	C1203	0.4676
High	GKAFFLSSY	11	1	1	O75123		0	3.15275e+06	0	0.0006605	3.54216	2	1019.52	-0.708965	72.0302	0	C1203	40.74	B1503	0.1579
High	GKSFTSNSY	5	2	2	Q8N988;Q96NG5		0	1.92659e+06	0	0.001016	3.54075	2	990.453	-0.037339	36.5269	0	C1203	40.74	B1503	0.1071
High	SAYEIIRDY	17	1	1	O60287		0	3.99548e+06	0	0.0006936	3.53938	2	1129.55	-0.887166	64.5855	0	C1203	88.89	C1203	0.0162
High	KKGPSGYGF	17	1	1	O14745		0	1.3657e+07	0	0.001528	3.53634	2	940.487	-2.11525	37.1	0	C1203	37.04	B1503	0.0927
High	FGFPGERTY	36	1	1	Q9Y4K0		0	5.16596e+07	0	2.021e-05	3.52859	2	1073.5	-1.19191	64.3827	0	C1203	59.26	C1203	0.0252
High	VQGIFVEKY	13	3	3	P62834;P61224;A6NIZ1		0	4.87598e+06	0	0.0002523	3.52793	2	1082.59	-0.723662	63.9775	0	C1203	44.44	B1503	0.2769
High	IKADHVSTY	8	1	1	P20036		0	3.61259e+06	0	0.0005901	3.52496	2	1033.53	0.104853	32.8406	0	C1203	51.85	B1503	0.0024
High	AQEDAQRLY	4	1	1	P20073		0	1.63282e+06	0	6.08e-05	3.52489	2	1093.53	-0.475803	41.3976	0	C1203	48.15	B1503	0.0418
High	GQYSTGKTTF	18	3	3	Q9H4M9;Q9NZN3;Q9H223		0	4.31361e+06	0	0.0002433	3.52391	2	1089.52	-0.313668	41.7391	0	C1203	31.43	B1503	0.0118
High	SAISSVRLY	15	1	1	P42285		0	4.45658e+06	0	0.0002428	3.52316	2	995.551	-0.614835	62.3907	0	C1203	85.19	C1203	0.0858
High	SKLQNNNVY	13	1	1	P63010		0	6.70198e+06	0	0.0001547	3.51976	2	1079.55	-0.33929	36.1994	0	C1203	40.74	B1503	0.0398
High	NKYLTAEAF	19	1	1	Q16658		0	5.85055e+06	0	0.0002376	3.51822	2	1056.53	-1.28319	60.9326	0	C1203	33.33	B1503	0.1519
High	SKASQFTGY	10	1	1	O94966		0	2.62486e+06	0	0.0005867	3.51673	2	988.473	-0.272309	42.3938	0	C1203	44.44	B1503	0.0836
High	FKFmPPPTY	37	1	1	Q9H3M7	M4(Oxidation)	0	4.55626e+06	0	3.079e-05	3.50938	2	1143.55	-0.9672	67.7179	0	C1203	51.85	B1503	0.0044
High	GKVGGLLAF	28	1	1	P28340		0	1.45082e+07	0	0.001155	3.49255	2	861.519	-0.196975	74.1677	0	C1203	37.04	B1503	0.0193
High	YQFTGIKKY	26	1	1	Q96IX5		0	2.66753e+07	0	2.918e-05	3.49112	2	1147.61	-1.25	50.8435	0	C1203	51.85	B1503	0.0015
High	YmIDPSGVSY	79	1	1	P25788	M2(Oxidation)	0	1.5817e+07	0	2.274e-07	3.48953	2	1147.5	-0.664515	69.2715	0	C1203	48.57	B1503	0.0334
High	GKVGSQSSF	13	1	1	Q9BY84		0	2.40277e+06	0	0.000961	3.48645	2	896.447	-0.0782495	31.056	0	C1203	33.33	B1503	0.0394
High	GKVGFQSFF	13	1	1	P60903		0	4.20265e+06	0	0.001252	3.48576	2	1016.52	-0.454936	78.5303	0	C1203	33.33	B1503	0.296
High	SKFSQQQSF	2	1	1	Q15642		0	911214	0	0.001486	3.48183	2	1086.52	-0.62746	42.2454	0	C1203	37.04	B1503	0.0069
High	GKPPFEANTY	27	1	1	O14965		0	2.28155e+07	0	2.945e-05	3.48073	2	1123.54	-1.06297	51.3573	0	C1203	31.43	B1503	0.921
High	DTFVHVTDL	16	1	1	P62263		0	5.67587e+06	0	0.001405	3.47645	2	1046.52	0.316573	72.9015	0	C1203	74.07	A6802	0.4268
High	KLFLTGESY	9	1	1	P10619		0	1.9004e+06	0	6.998e-05	3.47183	2	1057.56	-0.718297	64.9398	0	C1203	40.74	B1503	0.0361
High	AQIKFLNTY	9	1	1	Q8ND90		0	3.80847e+06	0	0.0003393	3.46765	2	1097.6	-0.959651	68.114	0	C1203	44.44	B1503	0.0029
High	GQYSPPPYSEY	26	1	1	Q96BY9		0	9.26217e+06	0	4.105e-07	3.46504	2	1287.55	-0.125351	63.2904	0		0	B1503	0.0875
High	KQIESKTAF	12	1	1	P10599		0	8.22769e+06	0	0.0003697	3.46494	2	1051.58	-0.567702	32.4377	0	C1203	33.33	B1503	0.0018
High	RLYFSQQTY	24	1	1	P33897		0	8.82496e+06	0	0.0001606	3.46182	2	1205.59	-1.16776	59.3255	0	C1203	44.44	B1503	0.0148
High	VGVDFALKV	15	1	1	O14966		0	2.96019e+06	0	0.0004765	3.4609	2	947.556	-0.475617	77.2967	0	C1203	48.15	C1203	1.2819
High	STYEGKPIFL	4	1	1	Q9NU02		0	1.80499e+06	0	0.0004644	3.45758	2	1154.61	-0.3716	69.2554	0	C1203	60	A6802	0.1994
High	FTADFVRQL	16	1	1	Q96Q15		0	6.3982e+06	0	0.0002046	3.44855	2	1096.58	-0.631822	75.1352	0	C1203	85.19	C1203	0.0142
High	VQFGANKSQY	10	1	1	Q7Z7E8		0	2.5384e+06	0	2.226e-05	3.44836	2	1141.56	-0.779248	44.5446	0	C1203	40	B1503	0.0217
High	LSFQEVREY	10	1	1	O00311		0	1.21497e+06	0	8.08e-05	3.44193	2	1170.58	-1.02079	64.6188	0	C1203	81.48	C1203	0.2278
High	GKNLYTNEY	8	3	3	Q9HCP0;P78368;Q9Y6M4		0	2.8621e+06	0	0.0001335	3.43986	2	1101.52	-0.522813	44.1772	0	C1203	40.74	B1503	0.0801
High	AQYDQASTKY	4	1	1	P49454		0	1.17908e+06	0	2.426e-05	3.43373	2	1174.54	0.114049	37.3449	0	C1203	40	B1503	0.0059
High	AKYPHVEDY	39	1	1	P61289		0	8.34451e+06	0	0.0005914	3.42646	2	1121.53	-0.262852	42.7575	0	C1203	55.56	B1503	0.0063
High	AQHLTVSGF	11	1	1	Q96GX5		0	2.68738e+06	0	0.000706	3.42628	2	959.494	-0.749653	57.1112	0	C1203	37.04	B1503	0.0138
High	TQmPDPKTF	76	1	1	Q9Y5V0	M3(Oxidation)	0	8.55138e+06	0	0.001602	3.42509	2	1080.5	-0.656514	48.3443	0	C1203	48.15	B1503	0.009
High	SQYGSQVGY	10	1	1	Q14147		0	5.42261e+06	0	0.0005482	3.42317	2	988.438	0.677235	48.9319	0	C1203	48.15	B1503	0.0029
High	LAKAWPTVL	15	1	1	P31040		0	4.69163e+06	0	0.0008483	3.42164	2	998.603	-0.245666	74.3127	0	C1203	81.48	C1203	0.0648
High	EIFNLKFAQA	15	1	1	P78347		0	3.18295e+06	0	5e-05	3.42095	2	1180.64	-0.50452	79.5987	0	C1203	8.57	A6802	1.561
High	IQEESLRTY	3	2	2	Q99613;B5ME19		0	1.68028e+06	0	0.0006953	3.41493	2	1138.57	-0.653084	48.206	0	C1203	48.15	B1503	0.0154
High	AASALIRTL	14	1	1	Q13535		0	3.82555e+06	0	7.564e-05	3.4125	2	915.562	-0.0654376	61.6795	0	C1203	92.59	C1203	0.0771
High	TTFEHAHNm	16	1	1	P13639	M9(Oxidation)	0	899393	0	8.326e-05	3.41023	2	1103.46	-0.498	15.2203	0	C1203	66.67	A6802	0.0346
High	TAAQVARVL	17	1	1	A5YKK6		0	6.98557e+06	0	0.0004477	3.41001	2	928.557	-0.536209	50.9462	0	C1203	85.19	C1203	0.1716
High	GKSSGPTSLF	14	1	1	Q00839		0	2.96391e+06	0	0.0008349	3.40596	2	980.504	-0.408163	56.9859	0	C1203	34.29	B1503	0.5851
High	LSAGATRVY	5	2	2	P60891;P21108		0	1.12259e+06	0	0.0003408	3.40526	2	937.51	-0.142863	44.0115	0	C1203	81.48	C1203	0.2943
High	KAADIASKV	3	1	1	O95671		0	622370	0	0.0002172	3.40023	2	902.531	-0.118731	33.4743	0	C1203	81.48	C1203	0.1093
High	NVVDVFHAV	14	1	1	Q15262		0	1.15176e+07	0	3.889e-05	3.39318	2	999.526	-0.169016	73.7647	0	C1203	40.74	A6802	0.0022
High	TKVGPNATY	10	1	1	Q9Y5V3		0	3.40294e+06	0	0.001414	3.39278	2	950.494	-0.334828	37.0968	0	C1203	44.44	B1503	0.0179
High	EVFDKTYQF	33	1	1	Q96EU6		0	2.76897e+07	0	0.0005711	3.39205	2	1176.56	-0.436083	66.2914	0	C1203	37.04	A6802	0.1371
High	EVFEDAAEIRL	1	1	1	P19338		0	2.44173e+06	0	1.557e-06	3.39116	2	1291.65	-0.040003	78.7902	0		0	A6802	0.803
High	HQQPPSQQY	28	1	1	Q15532		0	7.36982e+06	0	8.45e-06	3.39049	2	1112.51	-0.175235	28.363	0	C1203	44.44	B1503	0.0037
High	IGVDFALKV	1	2	2	Q13637;P57729		0	981974	0	0.0003195	3.38959	2	961.571	-0.558158	81.1958	0	C1203	44.44	C1203	1.1246
High	QKIDVQESF	19	1	1	O95602		0	6.0824e+06	0	0.0004929	3.38618	2	1093.55	-0.711406	54.5511	0	C1203	33.33	B1503	0.0609
High	NVAEVTQSEI	8	2	2	Q9NVD7;Q9HBI1		0	2.4684e+06	0	0.0001169	3.38373	2	1089.54	0.441385	59.5697	0	C1203	14.29	A6802	0.0973
High	YASENVNKL	7	2	2	P62820;Q9H0U4		0	2.94273e+06	0	0.0001211	3.37748	2	1037.53	-0.529081	42.3167	0	C1203	88.89	C1203	0.0115
High	VTYNYPVHY	15	1	1	Q9NV96		0	4.05928e+06	0	9.069e-05	3.37612	2	1155.55	1.04885	58.9044	0	C1203	81.48	C1203	0.0317
High	KAITFVTQY	15	1	1	Q9H0S4		0	7.47186e+06	0	6.798e-05	3.37366	2	1070.59	-1.17852	62.8203	0	C1203	77.78	C1203	0.0505
High	SAYGSVKAY	73	2	2	P07355;A6NMY6		0	1.04957e+08	0	0.000145	3.37045	2	945.467	-0.455452	42.1336	0	C1203	88.89	C1203	0.0083
High	GKLGFLASY	19	1	1	Q12772		0	4.47282e+06	0	0.000848	3.36833	2	955.524	-0.781649	71.6056	0	C1203	40.74	B1503	0.0566
High	VKNPDGGSY	10	1	1	Q15646		0	3.17041e+06	0	2.233e-05	3.36711	2	936.442	-0.114369	28.083	0	C1203	48.15	B1503	0.0469
High	KQTQTFTTY	15	3	3	P54652;P17066;P11142		0	5.58383e+06	0	0.0002961	3.3663	2	1117.55	-0.450823	43.8197	0	C1203	40.74	B1503	0.0027
High	TTVEIFNKL	63	1	1	Q96QK1		0	1.41008e+08	0	0.001621	3.36248	2	1064.6	0.343155	72.5447	0	C1203	70.37	A6802	0.0152
High	YAFPKAVSVF	29	1	1	O15427		0	1.47994e+07	0	2.563e-07	3.36003	2	1128.61	-0.899883	81.195	0	C1203	77.14	C1203	0.059
High	EVYAGNFVEV	15	1	1	Q9UBS4		0	4.44661e+06	0	9.3e-05	3.35911	2	1126.54	-0.658846	79.2547	0	C1203	31.43	A6802	0.0196
High	DTFFRPLNV	15	1	1	Q13444		0	1.11222e+07	0	0.0001104	3.35878	2	1108.58	-1.06544	81.6374	0	C1203	77.78	A6802	0.0509
High	SKYEALQTF	17	2	2	O15525;O60675		0	4.00933e+06	0	0.000375	3.35744	2	1086.55	-0.405987	58.8017	0	C1203	40.74	B1503	0.0033
High	AQNPANMSKY	2	2	2	P50502;Q8NFI4		0	1.36774e+06	0	0.0001457	3.35405	2	1123.52	-0.799864	39.5373	0	C1203	34.29	B1503	0.0106
High	YQSDPSGNY	12	1	1	P25789		0	5.26608e+06	0	0.0001219	3.34949	2	1030.41	0.177843	39.3354	0	C1203	48.15	B1503	0.0126
High	AKAPPPVFY	22	1	1	Q16643		0	5.15059e+06	0	0.0007811	3.3415	2	989.546	0.305863	58.357	0	C1203	59.26	B1503	0.0077
High	SNSDVIRQV	20	1	1	Q9Y5K5		0	2.5596e+07	0	0.001556	3.34064	2	1017.53	-1.43476	44.0098	0	C1203	51.85	A6802	1.2171
High	NAANIFERL	13	2	2	Q9Y6D6;Q9Y6D5		0	2.82088e+06	0	4.541e-05	3.34036	2	1047.56	0.400979	72.939	0	C1203	77.78	A6802	0.1099
High	GKYIPKQSF	24	1	1	Q9P0I2		0	8.4207e+06	0	0.0001125	3.33612	2	1067.59	-0.471227	41.8954	0	C1203	33.33	B1503	0.022
High	DVIDFTGHAL	16	2	2	P31150;P50395		0	2.16219e+06	0	0.0002524	3.33463	2	1087.54	-0.88286	78.1192	0	C1203	40	A6802	0.1132
High	TVAQIKATV	16	1	1	Q8IXM2		0	5.95012e+06	0	0.001035	3.33266	2	930.561	-0.551677	48.1926	0	C1203	44.44	A6802	0.0147
High	GKLLIGTLY	18	1	1	Q15165		0	3.19917e+06	0	0.0001584	3.31469	2	977.602	-0.579693	76.1932	0	C1203	37.04	B1503	0.2399
High	YQSPHSGSF	12	1	1	P32004		0	2.2005e+06	0	0.0002898	3.31115	2	1009.44	0.0844664	39.1948	0	C1203	44.44	B1503	0.0029
High	GKVPQPAIL	5	1	1	P24928		0	3.95614e+06	0	0.001473	3.30738	2	922.572	-0.277873	58.9927	0	C1203	48.15	B1503	0.6706
High	SAVDFIRTL	32	1	1	Q9UEE5		0	3.45652e+07	0	0.0001806	3.30573	2	1021.57	-0.583481	80.5813	0	C1203	88.89	C1203	0.0059
High	RQQPPSTTTF	25	1	1	A3KN83		0	5.17993e+06	0	1.303e-05	3.30528	2	1162.58	-0.437796	42.7592	0	C1203	37.14	B1503	0.0083
High	SGFSGVIRL	23	1	1	P11309		0	6.28827e+06	0	5.756e-05	3.3027	2	935.531	-0.467284	73.7716	0	C1203	51.85	C1203	0.15
High	KQTQIFTTY	15	2	2	P34931;P08107		0	4.23384e+06	0	5.78e-05	3.30242	2	1129.59	-0.889835	56.1682	0	C1203	40.74	B1503	0.0027
High	NTVDFFNQI	68	2	2	Q9H8S9;Q7L9L4		0	1.69629e+08	0	0.001071	3.30229	2	1097.53	-0.286822	89.9656	0	C1203	62.96	A6802	0.0064
High	FASGLIHRV	63	1	1	Q8N6L1		0	1.34996e+08	0	0.000714	3.29588	2	999.573	-0.853265	52.527	0	C1203	88.89	A6802	0.0309
High	LLYESPERY	20	1	1	Q03518		0	6.98513e+06	0	1.805e-05	3.29476	2	1169.58	-0.273326	57.2661	0	C1203	48.15	B1503	0.1254
High	SQIRQSTAY	11	1	1	O43150		0	4.1548e+06	0	0.0007144	3.29426	2	1053.53	-1.01915	33.9582	0	C1203	37.04	B1503	0.0042
High	DTAEIIKTL	21	1	1	P82909		0	1.58042e+07	0	0.0007672	3.29271	2	1003.57	-0.716965	70.5068	0	C1203	85.19	A6802	0.0243
High	ETYQFSGVYV	37	1	1	P61160		0	1.67649e+07	0	9.17e-05	3.28253	2	1192.55	-0.248114	81.5626	0	C1203	45.71	A6802	0.0448
High	FSNDIPHVV	21	1	1	Q8NI36		0	1.45441e+07	0	0.0004563	3.28172	2	1027.52	-1.38838	63.7276	0	C1203	81.48	A6802	0.0344
High	DVYDKVDYL	13	1	1	Q14254		0	9.30494e+06	0	0.0002529	3.27822	2	1129.54	-0.131094	68.4747	0	C1203	48.15	A6802	0.0235
High	NVPEGLLATVTV	25	5	5	P54707;P05023;P50993;P13637;Q13733		0	3.47055e+06	0	3.861e-05	3.27598	2	1212.68	0.123733	93.3935	0		0	A6802	0.9815
High	YVADLVHSA	7	1	1	Q96S97		0	1.97277e+06	0	4.212e-05	3.27038	2	974.494	-0.326582	53.3578	0	C1203	14.81	A6802	0.0116
High	NTATIFHEL	34	1	1	Q9UHD2		0	8.63028e+07	0	0.0004368	3.2694	2	1045.53	-1.30697	67.7655	0	C1203	74.07	A6802	0.0071
High	AAFLKAIGY	24	1	1	O75533		0	1.34196e+07	0	4.036e-05	3.26544	2	953.545	-0.322675	71.8648	0	C1203	85.19	C1203	0.1556
High	IKYDPSIGIY	1	1	1	P62913		0	1.98488e+06	0	7.123e-05	3.26149	2	1168.62	-0.484436	69.3086	0	C1203	42.86	B1503	0.0478
High	RLYGPSSVSF	24	1	1	P50454		0	6.71895e+06	0	1.604e-05	3.25542	2	1112.57	-0.646964	65.62	0	C1203	42.86	B1503	0.1323
High	TTFDHQNSENV	9	1	1	Q9Y2D8		0	2.25056e+06	0	0.0001305	3.25228	2	1291.55	0.00614714	38.122	0		0	A6802	0.3537
High	DTAEIFHSA	19	1	1	Q92538		0	2.57255e+07	0	0.0009105	3.2483	2	990.452	-0.488896	54.557	0	C1203	37.04	A6802	0.0068
High	SQYPFPVTLY	15	1	1	Q5R372		0	1.53614e+06	0	1.981e-05	3.24592	2	1214.61	-0.236276	96.4779	0	C1203	34.29	B1503	0.0041
High	EVFPTAGAGTDL	8	1	1	P28331		0	1.52814e+06	0	0.0001047	3.243	2	1177.57	-0.0657056	75.6987	0		0	A6802	1.9093
High	SSYDKPITF	12	1	1	Q86X10		0	4.85108e+06	0	9.243e-05	3.24129	2	1057.52	-0.244261	60.225	0	C1203	77.78	C1203	0.0042
High	KAYGASKTF	8	1	1	P27694		0	2.44473e+06	0	0.001019	3.23566	2	972.515	-0.252195	29.7951	0	C1203	81.48	C1203	0.01
High	AAQEAVKLY	8	1	1	O60506		0	3.32772e+06	0	0.000135	3.23316	2	992.541	-0.590764	51.2167	0	C1203	88.89	B1503	0.4966
High	SKLPSSIEY	12	1	1	Q15386		0	5.29125e+06	0	0.001057	3.22996	2	1023.54	-0.634587	55.3452	0	C1203	51.85	B1503	0.0129
High	SKINPNTAY	7	2	2	Q6IN85;Q5MIZ7		0	2.57854e+06	0	0.0008112	3.22852	2	1007.52	-0.0493654	38.437	0	C1203	37.04	B1503	0.0068
High	GQISDPSRSY	5	1	1	Q14207		0	711915	0	0.0001035	3.22827	2	1109.52	0.0478545	39.8009	0	C1203	34.29	B1503	0.015
High	GQFLVKSGY	10	1	1	Q9NZI8		0	4.54803e+06	0	0.0002245	3.22322	2	998.53	-0.820787	54.6994	0	C1203	40.74	B1503	0.0481
High	AKQDVVLNY	14	1	1	Q15029		0	6.88377e+06	0	0.0006825	3.22234	2	1049.56	-0.419139	53.2571	0	C1203	51.85	B1503	0.0235
High	ETIGTGGFAKV	17	1	1	Q14680		0	2.97275e+07	0	5.409e-05	3.2211	2	1079.57	-0.605736	58.3937	0		0	A6802	0.2563
High	LQRLENTQY	10	1	1	Q96D70		0	2.76118e+06	0	0.0007034	3.21319	2	1164.6	-0.659553	45.3682	0	C1203	37.04	B1503	0.0108
High	GQYNKEDPTSF	18	1	1	Q15437		0	4.39368e+06	0	4.908e-06	3.20878	2	1285.57	-0.233231	47.0929	0		0	B1503	0.1347
High	YKVEYPImY	8	1	1	O14880	M8(Oxidation)	0	2.72052e+06	0	0.0001783	3.20162	2	1221.59	0.0498279	68.0221	0	C1203	51.85	B1503	0.0153
High	EVFPLAmNYL	41	3	3	P24385;P30279;P30281	M7(Oxidation)	0	2.99205e+06	0	3.917e-05	3.19409	2	1212.6	-0.00401875	95.7128	0	C1203	40	A6802	0.0835
High	SKEDDVRQY	15	1	1	P62753		0	3.04914e+06	0	0.0001604	3.18968	2	1139.53	-0.445041	28.4425	0	C1203	48.15	B1503	0.5897
High	FKFGDQGGF	17	1	1	P49790		0	3.82682e+06	0	0.0004622	3.18654	2	1002.47	-1.4075	66.4725	0	C1203	40.74	B1503	0.2126
High	RQEGVPRTF	43	1	1	Q00403		0	3.59659e+07	0	0.001228	3.18588	2	1089.58	-0.688402	40.009	0	C1203	44.44	B1503	0.0078
High	AQLHPLSGY	5	1	1	Q7L7V1		0	1.7453e+06	0	0.0002883	3.18053	2	985.51	-0.249623	53.7291	0	C1203	40.74	B1503	0.0144
High	AQFPNGPQF	12	1	1	Q99595		0	1.67764e+07	0	0.0002646	3.17921	2	1005.48	-0.275532	71.0716	0	C1203	44.44	B1503	0.0011
High	FKNIQPSSF	10	1	1	Q9BVQ7		0	2.82082e+06	0	3.389e-05	3.17256	2	1067.55	-0.697081	57.948	0	C1203	37.04	B1503	0.027
High	RAFGIPIRV	47	1	1	P06493		0	2.19696e+07	0	0.0007534	3.17246	2	1028.64	-1.32597	67.5714	0	C1203	88.89	C1203	0.0166
High	VKVVPTVY	12	1	1	Q9Y282		0	4.52219e+06	0	0.0008976	3.1607	2	904.55	-0.452174	57.5806	0	C1203	36.67	B1503	0.4625
High	AQTDPTTGY	2	1	1	Q9Y4K0		0	1.06083e+06	0	0.0006585	3.16013	2	953.421	0.0396905	39.8592	0	C1203	44.44	B1503	0.0073
High	DSFYVHHDI	4	1	1	Q13610		0	2.25438e+06	0	0.0008044	3.15367	2	1132.5	-1.00223	51.6625	0	C1203	62.96	A6802	0.629
High	SVITQVFHV	16	1	1	Q00341		0	8.66614e+06	0	0.0001553	3.15047	2	1029.57	-0.701473	80.3612	0	C1203	40.74	A6802	0.03
High	STSDLYNFQV	20	1	1	P10914		0	1.15144e+07	0	0.0001028	3.14944	2	1173.54	-1.4455	80.898	0	C1203	45.71	A6802	0.1604
High	TLADVLYHV	21	1	1	Q9UBL3		0	5.0488e+06	0	0.0009674	3.14942	2	1030.56	-0.583527	80.2475	0	C1203	44.44	A6802	0.0213
High	HAAGVLLHV	9	1	1	Q6UX98		0	3.41046e+06	0	0.0003149	3.14491	2	916.536	-0.586011	51.3681	0	C1203	85.19	A6802	0.0153
High	KASGTLREY	57	1	1	Q02543		0	5.02128e+07	0	0.0002381	3.14388	2	1024.54	-0.296312	28.4065	0	C1203	88.89	C1203	0.2953
High	AKVANASYY	13	1	1	O15042		0	3.43133e+06	0	0.001433	3.13731	2	986.494	-0.559956	39.1733	0	C1203	40.74	B1503	0.0678
High	YTSDLHFQV	15	1	1	Q1KMD3		0	8.73402e+06	0	0.0004909	3.13575	2	1109.53	-0.595755	67.7722	0	C1203	77.78	A6802	0.0061
High	STFIGEHYV	21	1	1	P08581		0	1.2781e+07	0	0.0007109	3.13462	2	1052.5	-1.2311	61.7537	0	C1203	70.37	A6802	0.0172
High	TVFNFQEKV	10	1	1	Q14204		0	5.87411e+06	0	0.001196	3.13339	2	1111.58	-0.537059	66.8787	0	C1203	40.74	A6802	0.0273
High	VKGVSLSSY	12	1	1	Q9Y3B1		0	3.83389e+06	0	0.001285	3.12824	2	939.514	-0.613775	51.8581	0	C1203	40.74	B1503	0.2068
High	AKAQSGLAF	6	1	1	Q9Y520		0	2.19783e+06	0	0.0006652	3.12682	2	892.489	-0.256973	49.1624	0	C1203	40.74	B1503	0.0071
High	DVSNPQTVGV	18	1	1	O60493		0	1.93005e+07	0	0.0003233	3.12394	2	1015.5	-0.872536	54.5787	0	C1203	28.57	A6802	0.1238
High	TVFDEAIRA	14	3	3	P63000;P15153;P60763		0	4.99255e+06	0	0.0002499	3.12217	2	1021.53	-0.401272	63.0889	0	C1203	11.11	A6802	0.0769
High	GKSSVIQVF	15	1	1	Q8WVC6		0	7.86867e+06	0	0.001337	3.12198	2	964.546	-0.569599	63.9988	0	C1203	44.44	B1503	0.0291
High	AQPPVGAAY	4	1	1	Q96SN8		0	2.6688e+06	0	0.0008532	3.12167	2	873.446	-0.152961	51.3208	0	C1203	48.15	B1503	0.0055
High	GQTTTYLTY	17	1	1	P11388		0	8.94747e+06	0	0.000465	3.12134	2	1047.5	-0.705056	63.9847	0	C1203	44.44	B1503	0.0257
High	ETLFPSKIGV	21	2	2	Q9H8S9;Q7L9L4		0	1.06634e+07	0	0.0001341	3.12119	2	1090.61	-0.480619	74.4871	0	C1203	45.71	A6802	0.0371
High	KQMEQISQF	9	2	2	P37802;Q9UI15		0	4.25879e+06	0	0.000633	3.11673	2	1138.55	-1.04699	52.3634	0	C1203	37.04	B1503	0.0022
High	FAFDPSVNY	16	1	1	Q8IYM9		0	2.39066e+06	0	0.0001217	3.11243	2	1059.48	-0.714229	82.9202	0	C1203	88.89	C1203	0.0043
High	NAFSGVmmL	83	1	1	Q9NTX5	M7(Oxidation); M8(Oxidation)	0	7.81417e+06	0	0.0004546	3.11167	2	1001.44	-0.699879	76.2198	0	C1203	85.19	C1203	0.0302
High	FSFPGELLm	129	2	2	P43003;P48664	M9(Oxidation)	0	1.67354e+07	0	9.485e-05	3.10638	2	1056.51	-0.441932	95.9963	0	C1203	77.78	C1203	0.0263
High	RAYQQSEAY	31	1	1	Q9P0W2		0	2.2733e+07	0	0.001023	3.10441	2	1115.51	-0.754375	33.0687	0	C1203	77.78	B1503	0.024
High	YSFGHPSSV	18	1	1	P31327		0	2.47382e+07	0	0.001538	3.10218	2	980.447	-0.611418	50.6918	0	C1203	81.48	C1203	0.0052
High	KQPDNSPEY	22	1	1	Q9NX07		0	5.70649e+06	0	0.0002639	3.10005	2	1077.48	-1.10739	30.9633	0	C1203	44.44	B1503	0.0567
High	YLADIFTKL	6	1	1	Q49AG3		0	816987	0	0.0002124	3.09916	2	1083.61	-0.398183	89.5721	0	C1203	48.15	C1203	0.0344
High	FAYGGWNYL	18	1	1	Q01650		0	3.78819e+06	0	0.0004694	3.09681	2	1090.5	0.0310655	93.7108	0	C1203	85.19	C1203	0.0035
High	TTFDKEFLL	21	1	1	O60306		0	4.74897e+06	0	0.000984	3.09668	2	1113.58	-0.339724	79.8946	0	C1203	74.07	A6802	0.0214
High	NVDISAPKV	5	1	1	Q09666		0	1.79059e+06	0	0.0003536	3.09641	2	942.525	-0.80047	56.1938	0	C1203	37.04	A6802	0.7329
High	KKANITFEY	7	1	1	O15372		0	5.40868e+06	0	0.0009754	3.09137	2	1113.59	-0.659175	49.5861	0	C1203	44.44	B1503	0.0366
High	SKFPTQISL	22	1	1	O15164		0	1.21529e+07	0	0.0004311	3.08947	2	1020.57	-0.563725	69.4848	0	C1203	51.85	B1503	0.061
High	AVIGDVIRV	8	1	1	Q9NR30		0	1.15958e+06	0	0.0007115	3.08418	2	941.578	-0.36009	72.2406	0	C1203	51.85	A6802	0.0594
High	FAYPAIRYL	53	1	1	P51398		0	2.83262e+07	0	0.0001523	3.08269	2	1113.61	-0.541657	82.0019	0	C1203	96.3	C1203	0.0012
High	ETFKDFPQm	58	2	2	P15170;Q8IYD1	M9(Oxidation)	0	1.08343e+07	0	0.0005005	3.08252	2	1158.51	0.590002	59.4685	0	C1203	62.96	A6802	0.2512
High	YSIDLSERV	5	1	1	Q6NTF9		0	2.50684e+06	0	0.0004725	3.08164	2	1081.55	0.0800082	65.1736	0	C1203	74.07	A6802	0.0375
High	SQYPFPVTL	40	1	1	Q5R372		0	2.46191e+07	0	0.0004921	3.08039	2	1051.55	-0.0735432	93.2537	0	C1203	59.26	B1503	0.007
High	VAAPQVQQV	17	1	1	Q12772		0	1.04561e+07	0	0.0005633	3.07755	2	939.526	-0.114846	53.1604	0	C1203	92.59	C1203	0.1209
High	SKNVSGISF	13	1	1	P49792		0	2.60672e+06	0	0.0008791	3.07751	2	938.494	-0.154659	54.5185	0	C1203	33.33	B1503	0.015
High	GKIQFGYVY	14	1	1	Q969M3		0	9.83873e+06	0	0.001216	3.07328	2	1074.56	-0.856736	68.3575	0	C1203	40.74	B1503	0.035
High	AASSIQRVL	18	2	2	Q5BKT4;Q5I7T1		0	8.19246e+06	0	0.001169	3.07247	2	944.552	-0.695487	51.1229	0	C1203	92.59	C1203	0.2688
High	GKVTGDTVY	5	1	1	Q6UX04		0	5.46146e+06	0	0.001097	3.07177	2	939.478	0.0391153	36.695	0	C1203	40.74	B1503	0.0783
High	GQVKTGISm	11	1	1	Q8TCN5	M9(Oxidation)	0	957171	0	0.0004507	3.07151	2	936.482	-0.418966	35.3186	0	C1203	33.33	B1503	0.0254
High	RQAPTGLGL	16	1	1	Q9BX59		0	5.75105e+06	0	0.0008247	3.06908	2	912.526	-0.357064	52.2096	0	C1203	51.85	B1503	0.0219
High	KGSSAVRVY	27	1	1	P10914		0	1.23466e+07	0	0.001235	3.06603	2	966.536	-0.706605	29.7771	0	C1203	55.56	B1503	0.7561
High	AKAGGFVVGY	3	1	1	Q9HAV4		0	1.58198e+06	0	0.0001986	3.06246	2	968.52	-0.540502	59.013	0	C1203	40	B1503	0.1049
High	SAADGPRVF	7	1	1	Q9Y285		0	1.79621e+06	0	0.0003307	3.06107	2	919.464	0.4452	48.939	0	C1203	85.19	C1203	0.0625
High	GQIPQILYY	11	1	1	O75592		0	1.82424e+06	0	1.349e-05	3.05927	2	1094.59	-0.585935	88.5541	0	C1203	51.85	B1503	0.0067
High	DLmAPQPGV	28	1	1	Q96B49	M3(Oxidation)	0	4.57522e+06	0	0.00135	3.05291	2	943.455	-0.297392	61.898	0	C1203	37.04	A6802	0.2434
High	QKLIFTVGY	7	1	1	Q8TDB6		0	867849	0	0.0006508	3.04556	2	1068.61	-0.484119	74.7871	0	C1203	40.74	B1503	0.606
High	YTKQPQNDYL	13	1	1	Q9H6R0		0	1.92755e+06	0	0.0008499	3.04366	2	1269.61	-0.193703	46.6057	0	C1203	54.29	A6802	1.3599
High	YAYDGKDYLA	28	17	17	P17693;P01892;P30447;P05534;P10316;P01889;P30460;Q04826;P30479;P30480;P30486;P18464;P30490;P30498;Q31610;P30499;P04222		0	1.44395e+07	0	0.0001504	3.04184	2	1178.54	-0.0226961	55.6191	0	C1203	45.71	A6802	0.4989
High	TTYDLTHTL	3	1	1	Q9NTJ5		0	5.65256e+06	0	0.0006714	3.03975	2	1064.53	-0.760233	62.8018	0	C1203	77.78	A6802	0.0051
High	KQIFETIYY	7	1	1	P23921		0	3.79833e+06	0	1.76e-05	3.03814	2	1204.62	-0.866996	74.0828	0	C1203	40.74	B1503	0.012
High	LKSGGVNQY	10	1	1	Q15021		0	3.52077e+06	0	0.0006223	3.03779	2	965.505	-0.429857	33.9103	0	C1203	48.15	B1503	0.0559
High	EVYPFGIVGm	43	1	1	O75534	M10(Oxidation)	0	3.04595e+06	0	0.0005391	3.03738	2	1127.54	-0.847693	89.0305	0	C1203	28.57	A6802	0.0891
High	YAFPVSNNL	7	1	1	Q13614		0	1.385e+06	0	0.000279	3.03413	2	1024.51	-0.632916	78.7246	0	C1203	88.89	C1203	0.0024
High	NLYGSPREY	46	1	1	Q9NZM1		0	4.49793e+07	0	0.0009034	3.03411	2	1098.52	0.94421	48.5295	0	C1203	55.56	B1503	0.1427
High	SQFGTVTRF	23	1	1	Q9BYG3		0	1.20204e+08	0	0.0003675	3.03343	2	1042.53	-0.231773	59.2594	0	C1203	40.74	B1503	0.0015
High	FIYDSVKVY	5	1	1	Q00325		0	1.34405e+06	0	4.953e-05	3.02992	2	1133.59	-0.274666	71.6704	0	C1203	59.26	C1203	0.0117
High	AQGPTPRYF	92	1	1	O60427		0	3.90463e+08	0	0.0003738	3.02707	2	1036.52	-0.752546	52.0687	0	C1203	48.15	B1503	0.0108
High	EVAALIRSL	23	1	1	Q6P2Q9		0	7.69635e+06	0	0.00108	3.0236	2	971.588	-0.475552	74.9955	0	C1203	48.15	A6802	0.0378
High	AAATSVHVV	19	1	1	Q68EM7		0	4.69747e+06	0	0.001389	3.02072	2	854.472	-0.798887	40.9177	0	C1203	88.89	C1203	0.3109
High	KQALSGFGY	5	1	1	O75340		0	1.57712e+06	0	0.0001628	3.01942	2	970.499	-0.541412	56.9017	0	C1203	40.74	B1503	0.0251
High	RLVQSPNSY	5	2	2	Q71UM5;P42677		0	1.77674e+06	0	0.0009614	3.00986	2	1063.55	-0.653975	43.3727	0	C1203	40.74	B1503	0.0284
High	GKTTQLTQY	13	2	2	Q92620;Q14562		0	4.42577e+06	0	0.0002039	3.00963	2	1039.54	-0.425058	38.3074	0	C1203	37.04	B1503	0.4062
High	YLYGQTTTY	25	1	1	P11388		0	1.04047e+07	0	9.627e-05	3.00891	2	1109.51	-0.789188	61.9674	0	C1203	51.85	B1503	0.0076
High	GKYGFSDPLTF	4	2	2	Q92569;P27986		0	1.15168e+06	0	0.0009909	3.00664	2	1231.6	-0.0978705	80.8502	0		0	B1503	0.7111
High	LQHPNIVGY	15	1	1	Q9BQI3		0	6.54354e+06	0	0.000311	3.00228	2	1040.55	-0.905385	57.1808	0	C1203	51.85	B1503	0.0036
High	SIAGIFKEV	5	1	1	Q9NQQ7		0	2.91897e+06	0	0.0002959	3.00111	2	963.551	-0.506073	74.8857	0	C1203	51.85	A6802	0.0436
High	SVYEGGVFFL	13	3	3	P51965;Q96LR5;Q969T4		0	2.38033e+06	0	0.0002997	2.99116	2	1117.56	-0.68868	102.179	0	C1203	37.14	A6802	0.1933
High	EVSPVSFHQV	42	1	1	Q8N543		0	8.99265e+07	0	7.543e-05	2.98995	2	1128.57	-0.679399	59.7824	0	C1203	25.71	A6802	0.0332
High	KLYQSIIGY	16	1	1	Q9NSV4		0	8925872	0	0.00161	2.98826	2	1084.6	-1.06457	68.2897	0	C1203	48.15	B1503	0.0529
High	NQIPFIIQY	16	1	1	P20592		0	2.34338e+06	0	0.000732	2.98681	2	1135.61	-0.19709	96.0407	0	C1203	51.85	B1503	0.008
High	GQAPPGKAL	28	1	1	A8MPP1		0	2.10147e+07	0	0.001308	2.9831	2	838.478	0.0187397	33.5947	0	C1203	51.85	B1503	0.0584
High	SSQFGGGSQY	12	1	1	O15371		0	2.22178e+06	0	0.0004241	2.97927	2	1017.43	-0.608392	45.9388	0	C1203	60	B1503	0.0122
High	SVSPVVRVAV	39	1	1	P13639		0	2.50509e+08	0	0.00153	2.97601	2	1012.61	-2.32452	61.6054	0	C1203	25.71	A6802	0.1278
High	YKILGGSVL	23	1	1	Q15843		0	8.09711e+06	0	0.0008724	2.97387	2	949.571	-0.608426	71.5231	0	C1203	44.44	B1503	0.1272
High	YAVDRAITH	6	1	1	P14866		0	1.19449e+06	0	0.0005793	2.97324	2	1045.54	-0.138974	38.9169	0	C1203	51.85	C1203	0.5525
High	YQSPVRVY	13	2	2	Q92503;O43304		0	5.17604e+06	0	0.00108	2.97234	2	1011.53	-0.318372	53.9961	0	C1203	43.33	B1503	0.0188
High	DIYSKFDVI	10	2	2	P54619;Q9UGJ0		0	1.84918e+06	0	0.0006766	2.96413	2	1099.57	-0.201207	81.7535	0	C1203	40.74	A6802	0.7913
High	AAAATGRLL	14	1	1	Q06481		0	2.57068e+06	0	0.0002275	2.96005	2	843.505	-0.125743	46.0762	0	C1203	85.19	C1203	0.2447
High	SAMPTVRSF	24	1	1	Q03518		0	1.82539e+07	0	0.001044	2.95916	2	995.497	-0.510512	58.5376	0	C1203	81.48	C1203	0.0052
High	EAAAVFKTL	22	1	1	Q8IWZ6		0	1.38902e+07	0	0.0006131	2.95863	2	949.535	-0.422935	63.1431	0	C1203	85.19	A6802	0.1297
High	QAFPLIIKL	6	1	1	Q14CZ7		0	941245	0	0.0003004	2.95345	2	1042.67	-0.506805	92.8803	0	C1203	92.59	C1203	0.0287
High	GQFPFPTAL	9	1	1	Q765P7		0	1.4006e+06	0	0.001474	2.95229	2	977.507	-1.87264	95.7484	0	C1203	51.85	B1503	0.0106
High	EVFNYIHNI	23	1	1	Q8N3P4		0	7.81471e+06	0	0.0001692	2.95152	2	1148.57	-0.61798	73.7887	0	C1203	37.04	A6802	0.0055
High	FTITPPTAQV	26	1	1	P52907		0	1.18954e+07	0	6.176e-05	2.94782	2	1074.58	-0.431954	78.3469	0	C1203	51.43	A6802	0.022
High	TTIDVRTTF	15	1	1	Q8IY21		0	5.11205e+06	0	0.0005118	2.94456	2	1053.56	-0.346251	62.8474	0	C1203	66.67	C1203	0.021
High	TTTEITHHGT	10	1	1	P15924		0	9.10333e+06	0	0.0001071	2.93415	2	1097.52	-0.164958	15.1636	0	C1203	20	A6802	1.9445
High	AKYPEIKSL	41	1	1	O15121		0	2.03367e+07	0	0.001357	2.93081	2	1048.6	-1.46943	50.8574	0	C1203	59.26	B1503	0.0541
High	KHFGTILNY	5	2	2	Q13829;Q9H3F6		0	4.92223e+06	0	0.001471	2.93008	2	1092.58	-0.796305	57.1791	0	C1203	51.85	B1503	0.0317
High	FAFSGVLRA	22	1	1	Q92766		0	1.11796e+07	0	0.0006091	2.92713	2	967.535	-0.665966	75.7095	0	C1203	55.56	C1203	0.208
High	KLAPPSSTL	2	1	1	Q7Z3B3		0	3.09418e+06	0	0.0002894	2.92633	2	913.534	-1.09678	50.6509	0	C1203	51.85	C1203	0.1281
High	AQAASQHVF	11	1	1	Q9NQT4		0	3.40301e+06	0	7.125e-05	2.926	2	958.474	-0.0351002	39.8225	0	C1203	40.74	B1503	0.0041
High	SVADVVRFI	12	1	1	Q9UHJ3		0	914074	0	0.0003985	2.92553	2	1005.57	-0.373922	83.3382	0	C1203	44.44	A6802	0.0166
High	YVTSILQSL	20	1	1	Q69YN4		0	4.45529e+06	0	0.001471	2.91967	2	1023.57	-0.399022	92.7896	0	C1203	44.44	C1203	0.0597
High	KQLPESESF	12	1	1	Q8NI35		0	2.72111e+06	0	0.000406	2.90859	2	1064.53	-0.673743	47.3759	0	C1203	37.04	B1503	0.0082
High	GQNPFELAF	12	1	1	Q9HBH9		0	1.45892e+06	0	0.001096	2.90671	2	1022.49	-0.390503	96.4009	0	C1203	40.74	B1503	0.006
High	GQKQYNVDY	3	1	1	Q9BT78		0	754997	0	0.00124	2.90541	2	1114.52	-0.416827	41.7569	0	C1203	40.74	B1503	0.0349
High	YAFPKSITVF	11	1	1	P53985		0	2.94807e+06	0	0.001417	2.90004	2	1172.63	-0.211555	84.2168	0	C1203	77.14	C1203	0.0324
High	YAFPKAVSV	37	1	1	O15427		0	6.56613e+07	0	0.0004612	2.89703	2	981.54	-0.599853	66.4145	0	C1203	92.59	C1203	0.0015
High	LSAPIHTQm	41	1	1	Q8NG31	M9(Oxidation)	0	5.53629e+06	0	0.0002473	2.88599	2	1013.51	-1.03941	43.8928	0	C1203	70.37	C1203	0.0508
High	AQLWTDLQY	6	1	1	Q63HN8		0	0	0	0.0003759	2.88588	2	1137.56	-0.63382	86.9151	0	C1203	44.44	B1503	0.0593
High	SIYGSYRNF	10	1	1	Q7L576		0	4.44152e+06	0	0.0001243	2.88177	2	1106.53	-0.344008	59.726	0	C1203	40.74	C1203	0.1909
High	YTFESTIIY	9	1	1	Q4LDE5		0	2.76354e+06	0	0.001251	2.87658	2	1136.55	-0.715149	86.359	0	C1203	81.48	C1203	0.0071
High	EVAGILEPVGL	20	1	1	O95229		0	6.60505e+06	0	0.000832	2.87593	2	1096.62	-0.552717	94.4087	0		0	A6802	0.3333
High	NAFSFPSEI	5	1	1	P17024		0	570779	0	0.0007938	2.87467	2	1011.48	-0.214926	88.7965	0	C1203	81.48	A6802	0.0796
High	AAYGYGIRY	50	3	3	P11216;P06737;P11217		0	2.52658e+07	0	0.0006464	2.87336	2	1033.51	-0.110241	58.0332	0	C1203	88.89	C1203	0.0164
High	FAFVTDNTY	4	1	1	P14635		0	690905	0	0.0008368	2.87231	2	1077.49	-0.646496	79.0439	0	C1203	85.19	C1203	0.0611
High	AKIVPKISY	21	1	1	Q7Z417		0	1.27689e+07	0	0.0003711	2.8704	2	1018.63	-1.15525	51.2271	0	C1203	44.44	B1503	0.013
High	IAFPSANEV	15	1	1	Q9NXH9		0	4.75947e+06	0	0.0004133	2.87033	2	947.483	-0.126023	73.0342	0	C1203	88.89	C1203	0.0131
High	YNFEKPVVm	8	1	1	O43929	M9(Oxidation)	0	2.09906e+06	0	0.0003766	2.86994	2	1142.55	-0.324887	57.2567	0	C1203	51.85	C1203	0.0617
High	TAFPFQVEV	19	1	1	A6NHR9		0	7.94098e+06	0	0.001351	2.86289	2	1037.53	-0.775646	95.1128	0	C1203	92.59	A6802	0.0162
High	EIAEAYLGYPV	19	1	1	P08107		0	3.40586e+06	0	1.11e-05	2.86044	2	1224.62	0.258476	86.5846	0		0	A6802	1.2683
High	IKPDGLLEF	4	1	1	Q15345		0	2.7418e+06	0	0.001463	2.85957	2	1031.58	-0.744187	79.1841	0	C1203	40.74	B1503	0.2297
High	FSYAFPKAV	2	2	2	O60669;O15427		0	1.23829e+06	0	0.0006133	2.85836	2	1029.54	-0.571886	71.4023	0	C1203	81.48	C1203	0.0255
High	FVNDIFERIA	15	14	14	P33778;P62807;P58876;Q93079;P06899;O60814;Q99880;Q99879;Q99877;P23527;Q16778;Q5QNW6;Q8N257;P57053		0	1.22976e+06	0	0.0002259	2.85545	2	1223.64	-0.0555703	83.6551	0	C1203	14.29	A6802	1.0194
High	QAIGAIRTL	7	1	1	Q9H7E9		0	2.1638e+06	0	0.000753	2.85464	2	942.573	-0.166236	58.5679	0	C1203	88.89	C1203	0.026
High	YVSEILEKV	4	1	1	P42704		0	2.11515e+06	0	0.0005385	2.85407	2	1079.6	-0.929663	68.7323	0	C1203	48.15	A6802	0.0089
High	YAAGVHSVL	18	1	1	O43299		0	6.97248e+06	0	0.0007196	2.84828	2	916.489	-0.0286314	52.8201	0	C1203	88.89	C1203	0.008
High	GKFGGDFLVY	37	1	1	Q9BSV6		0	2.23558e+07	0	0.001165	2.84455	2	1102.56	-0.563561	78.3606	0	C1203	54.29	B1503	0.1223
High	EVSFVIHNL	15	2	2	P49903;Q99611		0	2.773e+07	0	0.0009247	2.84311	2	1057.57	-0.958153	75.4385	0	C1203	44.44	A6802	0.0164
High	YGYRQSVTY	5	1	1	P08174		0	3.34887e+06	0	0.001338	2.84133	2	1136.54	-0.595448	48.2058	0	C1203	51.85	C1203	0.0393
High	EVIWLTQHV	6	1	1	Q9UJW0		0	1.80344e+06	0	0.001207	2.84063	2	1124.61	0.32526	76.3125	0	C1203	37.04	A6802	0.0285
High	YQTAPKAGY	7	1	1	Q96KR1		0	1.72743e+06	0	0.001208	2.83845	2	998.494	-0.369844	37.1086	0	C1203	40.74	B1503	0.0139
High	MTPEIIQKL	27	1	1	Q9UMS4		0	2.14641e+07	0	0.001309	2.83172	2	1072.61	-1.29667	70.3901	0	C1203	74.07	A6802	0.0397
High	YAQVmRTV	28	1	1	Q9NNW7	M5(Oxidation)	0	2.94588e+06	0	0.00144	2.82504	2	983.498	-0.253252	40.2602	0	C1203	80	C1203	3.4822
High	WAYPRQVFI	3	1	1	Q9P2D0		0	1.41244e+06	0	0.001237	2.82466	2	1179.63	-0.890863	80.4816	0	C1203	81.48	C1203	0.0611
High	EVFRIGNVEI	11	1	1	P15927		0	1.29658e+06	0	0.00145	2.8233	2	1175.64	-0.473171	85.3405	0	C1203	20	A6802	0.2481
High	FQYPDTRYL	27	1	1	Q9NY61		0	8.34556e+06	0	3.812e-05	2.82279	2	1202.58	-0.235715	69.919	0	C1203	55.56	C1203	0.0253
High	TTFESSHYL	20	1	1	Q16531		0	9.17572e+06	0	0.001408	2.82168	2	1084.5	0.875704	56.5723	0	C1203	74.07	A6802	0.0051
High	KAIATTVTY	17	1	1	O43808		0	1.30184e+07	0	0.001527	2.81846	2	967.545	-0.521505	47.6229	0	C1203	81.48	B1503	0.0276
High	SAKTPGFSV	19	1	1	Q9NY61		0	2.41057e+07	0	0.001125	2.8168	2	893.472	-0.599607	50.5317	0	C1203	74.07	C1203	0.3976
High	EVFDEKIEV	10	1	1	Q02952		0	5.19516e+06	0	0.0008632	2.81558	2	1107.56	-0.734435	68.2707	0	C1203	51.85	A6802	0.0047
High	YVTDVLYRV	1	1	1	Q96Q15		0	1.15608e+07	0	0.0007493	2.81147	2	1127.61	0.093507	73.3046	0	C1203	44.44	A6802	0.008
High	ETIIDTKGV	10	1	1	Q9GZS1		0	3.99623e+06	0	0.0002267	2.81136	2	975.535	-0.748878	52.6216	0	C1203	70.37	A6802	0.0365
High	SVSSVVHYL	9	1	1	Q9NRL2		0	3.28379e+06	0	0.001131	2.81039	2	990.525	0.00803503	65.8144	0	C1203	48.15	A6802	0.0169
High	GKFGITSAF	5	1	1	Q9H015		0	2.69345e+06	0	0.001351	2.80598	2	927.493	-0.10408	68.3077	0	C1203	37.04	B1503	0.0125
High	TVIAKVNNV	19	1	1	P26639		0	9.2633e+06	0	0.001088	2.80319	2	957.572	-0.70092	45.7564	0	C1203	40.74	A6802	0.0132
High	SQFPQPQHF	8	1	1	Q9P215		0	2.71899e+06	0	0.00138	2.80152	2	1115.53	-0.654986	56.5708	0	C1203	44.44	B1503	0.0011
High	IAFPTSISV	37	1	1	Q9UQ80		0	4.03842e+07	0	0.000544	2.80147	2	934.524	-0.31547	88.4818	0	C1203	88.89	C1203	0.0073
High	mTSEIHNTV	127	1	1	O43264	M1(Oxidation)	0	4.42599e+07	0	0.0008547	2.79934	2	1047.48	-0.456258	35.9603	0	C1203	77.78	A6802	0.0035
High	FTSPLTHNV	13	1	1	Q96A29		0	3.85978e+06	0	0.0005194	2.79894	2	1015.52	-0.733816	56.9304	0	C1203	81.48	A6802	0.0046
High	SAAGFPIRV	10	1	1	Q96H55		0	3.77342e+06	0	0.001203	2.78959	2	917.52	-0.0763246	66.9891	0	C1203	88.89	A6802	0.0336
High	DVYSGTPTKV	17	1	1	Q14493		0	9.38193e+06	0	0.0002023	2.78618	2	1066.54	-0.915443	47.9953	0	C1203	40	A6802	0.151
High	SVYDGHGGEEV	16	1	1	O15355		0	5.19108e+06	0	0.0001427	2.77923	2	1148.48	-0.514086	41.7687	0		0	A6802	0.6841
High	TTIEAIHGL	33	1	1	Q92905		0	5.05648e+07	0	0.0009668	2.77652	2	954.525	-0.77993	62.3793	0	C1203	74.07	A6802	0.004
High	IGVEHVVVY	9	1	1	P49411		0	2.62279e+07	0	0.000354	2.77548	2	1014.56	-0.736781	63.237	0	C1203	51.85	C1203	0.1241
High	TTFEHDIQAL	12	1	1	Q01082		0	9.83422e+06	0	0.001078	2.77329	2	1174.57	-0.225872	65.8885	0	C1203	57.14	A6802	0.1885
High	EIFSRGPYSV	14	1	1	Q7LBC6		0	3.16078e+06	0	0.0002759	2.76704	2	1154.58	-1.21438	64.7362	0	C1203	40	A6802	0.1114
High	VKFGGQLLSF	8	1	1	Q08945		0	742350	0	0.0006327	2.76433	2	1095.62	0.0340221	83.8558	0	C1203	51.43	B1503	0.1139
High	EVISGKQEGV	14	2	2	Q9Y227;Q9NQZ7		0	5.33252e+06	0	0.001564	2.76089	2	1045.55	-0.286622	38.2713	0	C1203	28.57	A6802	0.1576
High	GQYPTQPTY	53	1	1	Q15038		0	245715574	0	0.001309	2.75447	2	1054.48	-0.651821	53.3866	0	C1203	51.85	B1503	0.0016
High	GQYPVFNQY	15	1	1	Q96DN5		0	2.06705e+06	0	0.001036	2.74411	2	1115.52	-0.0903363	72.0636	0	C1203	48.15	B1503	0.0022
High	AKGPTLTVY	11	1	1	Q13616		0	6.02869e+06	0	0.001398	2.73894	2	949.535	-0.466151	54.3068	0	C1203	51.85	B1503	0.0107
High	FAISILQQI	14	2	2	P60842;Q14240		0	2.52892e+06	0	0.0002265	2.73812	2	1032.61	-0.0378196	102.174	0	C1203	74.07	C1203	0.0765
High	ISAPLVKTL	11	1	1	P30305		0	1.12561e+07	0	0.0007726	2.73706	2	941.603	-0.288373	66.287	0	C1203	88.89	C1203	0.0362
High	EVYGSLPAFL	29	1	1	Q01650		0	3.58162e+07	0	0.0009946	2.73045	2	1095.57	-0.836741	99.1613	0	C1203	40	A6802	0.1394
High	YAAPPSPPL	7	1	1	Q16610		0	4.13913e+06	0	0.001297	2.72697	2	912.483	0.0781157	66.8486	0	C1203	88.89	C1203	0.008
High	HVVDFFNRV	3	1	1	Q96BX8		0	3.13988e+06	0	0.001032	2.7207	2	1132.59	-0.826879	65.3903	0	C1203	40.74	A6802	0.0068
High	EIYNGKLFDL	10	1	1	Q99661		0	1.54008e+06	0	0.001263	2.71141	2	1211.63	-0.543746	82.9865	0	C1203	37.14	A6802	1.3597
High	FTAESSREV	2	1	1	Q5T8I3		0	1.26138e+06	0	0.00157	2.71088	2	1025.49	-0.542072	37.8634	0	C1203	85.19	A6802	0.0295
High	NVIGEPFLNV	13	1	1	P33991		0	1.42231e+06	0	0.0001155	2.71047	2	1101.59	-0.352073	93.0288	0	C1203	28.57	A6802	0.0868
High	EVIPNSNFYV	15	1	1	Q9NTJ3		0	3.34217e+06	0	0.001571	2.70953	2	1181.58	-0.072392	81.9407	0	C1203	25.71	A6802	0.0231
High	SAFPAVQYL	9	1	1	Q13227		0	3.03947e+06	0	0.001238	2.70935	2	995.519	-0.603436	88.5795	0	C1203	88.89	C1203	0.0028
High	EIFADPRTV	22	1	1	Q92871		0	1.19721e+07	0	0.001121	2.70564	2	1047.55	-1.11435	61.5397	0	C1203	51.85	A6802	0.1054
High	VQFSNHTGY	7	1	1	O00764		0	963575	0	0.000273	2.70242	2	1052.48	-0.638365	44.6225	0	C1203	48.15	B1503	0.0031
High	YVFDGKPPQL	17	1	1	P39748		0	3.80441e+06	0	6.503e-05	2.70223	2	1163.61	-0.136387	71.2544	0	C1203	57.14	C1203	0.1729
High	EVNSGIYRV	20	1	1	Q0VDF9		0	2.68927e+07	0	0.001038	2.7015	2	1036.54	-1.23502	50.7109	0	C1203	44.44	A6802	0.0069
High	EVSQVKETL	17	1	1	P30622		0	1.78258e+07	0	0.001392	2.70085	2	1032.56	-0.861248	44.4996	0	C1203	44.44	A6802	0.1209
High	HTINGHNAEV	42	1	1	P22626		0	4.38379e+07	0	0.0005414	2.70041	2	1091.52	-0.900683	29.0293	0	C1203	45.71	A6802	0.0866
High	EVFPDQFIHL	43	1	1	P07686		0	1.23601e+07	0	0.0001686	2.69778	2	1244.63	0.374428	91.1243	0	C1203	40	A6802	0.0767
High	SQGSFPEHY	14	1	1	Q9HBH0		0	3.26573e+06	0	0.00134	2.69608	2	1051.45	-0.625877	45.8407	0	C1203	44.44	B1503	0.0672
High	QKVLPVGVLY	5	1	1	Q03393		0	1.05638e+06	0	0.0007505	2.69585	2	1115.68	-0.484911	75.4068	0	C1203	37.14	B1503	0.6775
High	AQMAQILSF	3	1	1	P35237		0	380428	0	0.001174	2.69069	2	1008.52	-0.397019	90.1547	0	C1203	40.74	B1503	0.0036
High	EVWGEEFEKL	8	1	1	P23921		0	1.30433e+06	0	0.0007637	2.67775	2	1265.6	-0.486451	78.9593	0	C1203	31.43	A6802	1.1918
High	EVAPSFGTLL	15	1	1	Q5SRE5		0	3.51738e+06	0	0.0002322	2.67671	2	1033.56	-0.281898	92.5646	0	C1203	34.29	A6802	0.1054
High	EAADVWYNL	21	1	1	Q8TAM2		0	3.68652e+06	0	0.001398	2.67653	2	1080.5	-0.12215	86.9685	0	C1203	81.48	A6802	0.0283
High	TKQPIPAAY	1	1	1	Q6P1J9		0	1.95503e+06	0	0.001311	2.67618	2	988.546	-0.669139	47.3404	0	C1203	48.15	B1503	0.0164
High	DTITPQQVFV	13	1	1	Q9NZW5		0	2.03543e+06	0	4.255e-05	2.66889	2	1147.6	-0.317775	83.0115	0	C1203	45.71	A6802	0.1713
High	MVVDIVQEL	28	1	1	O00764		0	1.23188e+07	0	3.944e-05	2.6651	2	1045.56	0.107906	93.2606	0	C1203	48.15	A6802	0.0082
High	ESFEKAYQV	22	1	1	Q86V86		0	1.5387e+07	0	0.00144	2.66421	2	1100.52	-0.864458	53.5142	0	C1203	74.07	A6802	0.0087
High	GKWPSSQQY	5	1	1	Q8TD26		0	1.53872e+06	0	0.001526	2.66419	2	1080.51	-0.451384	45.168	0	C1203	44.44	B1503	0.0232
High	SSYGGTLRY	1	1	1	O15230		0	973777	0	0.001307	2.66241	2	1003.49	0.983399	49.0692	0	C1203	77.78	C1203	0.0108
High	VALLRVTPF	8	1	1	Q8N4H5		0	853698	0	0.001557	2.66001	2	1015.63	-1.0826	82.6885	0	C1203	74.07	C1203	0.6391
High	EVFEKATFI	32	1	1	P19338		0	3.54397e+07	0	0.00118	2.65903	2	1083.57	-0.967892	70.884	0	C1203	37.04	A6802	0.0158
High	REYEAQQQY	5	1	1	Q9NUQ8		0	1.35103e+06	0	0.0001591	2.65534	2	1214.54	-0.128995	34.3094	0	C1203	44.44	B1503	0.0052
High	RLFGTTVTF	31	1	1	Q15904		0	1.76238e+07	0	0.001023	2.64766	2	1041.57	-0.117001	76.3878	0	C1203	44.44	B1503	0.0118
High	AQPETRVSY	18	1	1	Q5SWA1		0	1.09671e+07	0	0.0009031	2.6459	2	1050.52	-0.648962	39.6899	0	C1203	48.15	B1503	0.0099
High	AQAPAQSQF	15	1	1	Q92793		0	3.50282e+06	0	0.001611	2.64501	2	947.458	-0.305021	44.693	0	C1203	44.44	B1503	0.0022
High	FATPFLVVR	43	1	1	P15954		0	2.56749e+07	0	0.0005365	2.64084	2	1049.61	-0.79113	81.54	0	C1203	55.56	C1203	3.519
High	EAFHGKFYEA	29	1	1	Q13045		0	1.30159e+07	0	0.0007149	2.64079	2	1198.55	-0.313326	47.773	0	C1203	42.86	A6802	0.6977
High	AQFETKKLY	38	1	1	O60613		0	1.93048e+07	0	0.001624	2.63839	2	1127.61	-0.673153	45.2608	0	C1203	51.85	B1503	0.004
High	EVAPAGSQV	7	1	1	O75147		0	2.74924e+06	0	0.001481	2.63756	2	857.436	-0.194154	41.6825	0	C1203	48.15	A6802	0.0081
High	YQVDSRTY	3	1	1	Q13131		0	1.0931e+06	0	0.0004402	2.63463	2	1031.48	-0.913463	41.4716	0	C1203	36.67	B1503	0.0362
High	RQLEDILSTY	19	1	1	P40222		0	5.66509e+06	0	0.001062	2.63063	2	1237.64	-0.156635	73.8948	0	C1203	28.57	B1503	0.0124
High	YKASSGLLY	6	1	1	Q08945		0	2.95234e+06	0	0.0006992	2.62838	2	1001.53	-0.834515	55.8688	0	C1203	51.85	B1503	0.0233
High	DVAEFLYQV	35	1	1	Q9Y5M8		0	1.73817e+07	0	0.001336	2.62762	2	1083.53	-0.721335	97.5553	0	C1203	44.44	A6802	0.0045
High	RVFPYSVFY	42	1	1	O15118		0	5.50788e+06	0	7.439e-05	2.62729	2	1177.6	-0.336281	84.8364	0	C1203	51.85	C1203	0.0153
High	AKVKFEERY	10	1	1	P61353		0	1.73076e+06	0	0.001359	2.61925	2	1169.63	-0.196802	35.8412	0	C1203	40.74	B1503	0.2739
High	FAYPNRPDVL	25	1	1	Q03518		0	2.00014e+07	0	0.0001941	2.60254	2	1191.62	-0.274632	67.6075	0	C1203	80	C1203	0.1481
High	TVVEFPIRGL	10	1	1	Q13107		0	912385	0	0.001394	2.59934	2	1130.66	0.671355	83.3521	0	C1203	31.43	A6802	0.2322
High	YAFPKSITV	25	1	1	P53985		0	6.29648e+07	0	0.000106	2.59708	2	1025.57	-1.01597	71.2019	0	C1203	96.3	C1203	0.0014
High	QAYSGIQQY	10	2	2	Q92879;O95319		0	4.18882e+06	0	0.0009552	2.59187	2	1057.49	-0.56833	54.0675	0	C1203	85.19	C1203	0.0283
High	ETIPSEIQVFV	15	1	1	Q15646		0	1.19702e+07	0	1.323e-05	2.59059	2	1261.67	-0.0755372	96.3086	0		0	A6802	0.339
High	AQLPEKVEY	11	1	1	P51532		0	6.63814e+06	0	0.00127	2.59018	2	1076.56	-0.555652	53.1118	0	C1203	55.56	B1503	0.006
High	AKAYPPTSm	40	1	1	Q8NCW5	M9(Oxidation)	0	2.51984e+06	0	3.844e-05	2.58861	2	981.471	-0.166593	34.2164	0	C1203	40.74	B1503	0.0387
High	EILNIFQGV	4	1	1	Q9H0H0		0	739331	0	0.001083	2.58828	2	1032.57	-0.507749	100.884	0	C1203	37.04	A6802	0.0751
High	EVLDFITHL	23	1	1	Q13057		0	6.23581e+06	0	4.201e-05	2.58737	2	1086.58	-0.427183	94.1826	0	C1203	44.44	A6802	0.0081
High	ETFEKTPVEV	7	1	1	Q15149		0	2.90703e+06	0	0.000264	2.57663	2	1178.59	-0.276407	57.6278	0	C1203	57.14	A6802	0.0202
High	YVTTSTRTY	7	1	1	P08670		0	1.998e+06	0	0.0009484	2.56305	2	1091.54	-0.65317	38.4379	0	C1203	48.15	C1203	0.1046
High	AKINEIRQm	12	1	1	Q15366	M9(Oxidation)	0	1.01313e+06	0	0.001145	2.55643	2	1118.6	-0.795979	32.6897	0	C1203	40.74	B1503	0.0761
High	ETSGIGEARV	29	1	1	P61764		0	4.50374e+07	0	0.0001584	2.55622	2	1018.52	-0.375537	41.9162	0	C1203	42.86	A6802	0.0618
High	EQYESFVKF	12	1	1	Q9H9L7		0	2.24325e+06	0	0.0009092	2.54308	2	1176.56	-0.643587	72.9448	0	C1203	40.74	B1503	0.0121
High	YAYPYSYYY	5	1	1	Q96PV6		0	1.25053e+06	0	3.344e-05	2.53978	2	1252.52	0.113123	79.4818	0	C1203	88.89	C1203	0.0021
High	ETFNTPAmYV	224	7	7	Q9BYX7;P60709;P63261;Q6S8J3;A5A3E0;P0CG38;P0CG39	M8(Oxidation)	0	1.28121e+08	0	0.001083	2.53519	2	1188.52	-0.18756	74.1067	0	C1203	48.57	A6802	0.0227
High	YAYDGKDYL	3	1	17	P17693;P01892;P30447;P05534;P10316;P01889;P30460;Q04826;P30479;P30480;P30486;P18464;P30490;P30498;Q31610;P30499;P04222		0	2.18206e+06	0	0.0005673	2.52979	2	1107.5	-0.675888	57.4922	0	C1203	85.19	C1203	0.0044
High	VALNFIISY	9	2	2	P50616;Q14106		0	1.96534e+06	0	0.0007763	2.52835	2	1039.58	-0.55663	100.289	0	C1203	85.19	C1203	0.0706
High	EVAGmLIGL	10	1	1	Q16850	M5(Oxidation)	0	7.15024e+06	0	0.001003	2.52659	2	918.496	-0.440885	82.9163	0	C1203	48.15	A6802	0.0084
High	QAYPEVRIV	12	1	1	Q08211		0	10971827	0	0.0009294	2.50995	2	1074.59	-1.11309	64.1575	0	C1203	92.59	C1203	0.1422
High	DTFYIFNHV	1	1	1	Q99805		0	1.29204e+06	0	0.000565	2.50543	2	1155.55	-0.350408	85.2057	0	C1203	70.37	A6802	0.0213
High	RAIDFSPYL	24	1	1	P17676		0	6.39753e+06	0	0.001375	2.50436	2	1081.57	-0.824027	77.4742	0	C1203	77.78	C1203	0.0061
High	KGYPSEFSTY	9	1	1	P49674		0	872446	0	0.000246	2.49561	2	1178.54	-0.954898	55.9155	0	C1203	34.29	B1503	0.7928
High	SSAPTARVF	21	1	1	O94906		0	2.23818e+07	0	0.0005986	2.49231	2	935.495	0.264326	48.1705	0	C1203	77.78	C1203	0.1048
High	STFGYVHGV	21	1	1	P38606		0	1.16931e+07	0	0.001483	2.48121	2	966.468	-0.481588	57.9936	0	C1203	77.78	A6802	0.0026
High	EVIEKFDYV	10	1	1	Q92871		0	3.34204e+06	0	0.001543	2.47916	2	1141.58	-0.791489	67.5893	0	C1203	40.74	A6802	0.0043
High	ETIPLTAEKL	15	1	1	P24385		0	8.49858e+06	0	0.0002285	2.4773	2	1114.63	-0.48088	66.6766	0	C1203	51.43	A6802	0.0816
High	ASYPELRLF	3	1	1	O75718		0	5.95136e+06	0	0.0005159	2.4751	2	1095.58	-0.279202	82.6344	0	C1203	77.78	C1203	0.1506
High	LAFPGEmLL	50	1	1	P43007	M7(Oxidation)	0	2.6789e+06	0	0.0003981	2.4613	2	1006.53	-0.0881648	96.4356	0	C1203	85.19	C1203	0.0274
High	NVAEIVIHI	5	1	1	Q9BZD4		0	1.24515e+06	0	0.0002336	2.45667	2	1007.59	-0.206335	80.088	0	C1203	44.44	A6802	0.0034
High	EVIDFSHGL	53	3	3	Q96GS6;Q5VST6;Q6PCB6		0	2.59064e+08	0	0.0003144	2.45219	2	1016.5	-0.874061	73.4109	0	C1203	40.74	A6802	0.0026
High	STIFPLDGV	14	1	1	O60318		0	1.52424e+06	0	0.001386	2.42832	2	948.504	-0.205268	92.2837	0	C1203	66.67	A6802	0.0135
High	NTIPFIIRY	4	1	1	Q8N5C6		0	1.17328e+07	0	0.0006406	2.4218	2	1136.65	0.85611	83.0435	0	C1203	81.48	C1203	0.1253
High	YTSGPGSRI	14	1	1	P05787		0	8.8446e+06	0	0.0005386	2.42169	2	937.473	-0.454482	36.5032	0	C1203	70.37	A6802	0.0996
High	EAADIIQKL	14	1	1	O00471		0	8.45615e+06	0	0.001169	2.41794	2	1000.57	0.10009	65.5595	0	C1203	85.19	A6802	0.0324
High	FSQDHLVIY	10	1	1	Q9BW91		0	5.12856e+06	0	0.0002887	2.39273	2	1121.56	-1.03635	68.2601	0	C1203	77.78	C1203	0.0724
High	EAVSFQHFI	16	1	1	Q99598		0	4.01333e+06	0	0.001084	2.38082	2	1077.54	-0.667421	75.4026	0	C1203	70.37	A6802	0.0811
High	LVSPITGEKI	13	1	1	Q15459		0	2.19421e+06	0	0.0009518	2.35743	2	1056.63	-1.09738	64.7251	0	C1203	20	A6802	1.2718
High	AKVVDKSEY	6	1	1	P42695		0	3.80931e+06	0	0.001063	2.34859	2	1038.55	-0.551919	28.1483	0	C1203	44.44	B1503	0.1616
High	GQFGVGFYSAY	7	3	3	Q58FF6;P07900;P08238		0	636318	0	0.001533	2.34487	2	1195.54	-0.275854	85.7672	0		0	B1503	0.3078
High	TASAVVQHm	9	1	1	O75533	M9(Oxidation)	0	366427	0	7.11e-06	2.34343	2	959.462	-0.00196448	30.6209	0	C1203	74.07	C1203	0.3108
High	RQFPTAFEF	20	1	1	Q13614		0	3.23421e+06	0	0.000458	2.33647	2	1142.56	-0.584512	78.4166	0	C1203	44.44	B1503	0.0057
High	TVADVVLWSV	12	1	1	Q13155		0	2.73754e+06	0	0.001086	2.33567	2	1088.6	-0.0100025	99.5541	0	C1203	31.43	A6802	0.0313
High	FAFPLHVDY	20	1	1	Q8TDY4		0	2.6231e+06	0	0.0004214	2.31937	2	1108.55	-0.596705	86.57	0	C1203	92.59	C1203	0.0261
High	ETADITHAL	18	1	1	Q15042		0	9.09465e+06	0	0.0008069	2.31669	2	970.484	-0.361802	54.0395	0	C1203	74.07	A6802	0.0018
High	RVYPQAVYF	43	1	1	Q9Y4A5		0	3.44205e+07	0	0.001501	2.31218	2	1142.6	-0.783328	68.7873	0	C1203	44.44	C1203	0.0071
High	NIPSFIVRL	12	1	1	P46781		0	2.90843e+06	0	0.001227	2.27984	2	1058.64	-0.530745	87.9691	0	C1203	48.15	A6802	0.1038
High	YTYPWVYNY	5	1	1	O00115		0	757320	0	0.000123	2.27561	2	1268.56	-0.143456	90.532	0	C1203	85.19	C1203	0.0095
High	ETFDFVHNV	26	1	1	Q96E29		0	1.42892e+07	0	0.001338	2.2484	2	1107.51	-0.371884	71.8234	0	C1203	77.78	A6802	0.001
High	IALPSLRIL	19	1	1	P00403		0	2.7062e+06	0	0.00119	2.23876	2	995.661	-0.235014	90.6368	0	C1203	85.19	C1203	0.1144
High	FTITPPTAQVV	13	1	1	P52907		0	1.10994e+06	0	0.001602	2.23432	2	1173.65	-0.759175	84.2081	0		0	A6802	0.828
High	GQIEPSFVF	4	1	1	O00443		0	1.5187e+06	0	0.000756	2.2311	2	1023.51	-0.404044	90.9635	0	C1203	37.04	B1503	0.0074
High	SKTGGYLVY	11	1	1	P46087		0	5.21758e+06	0	0.001208	2.19569	2	987.514	-0.697429	54.7418	0	C1203	48.15	B1503	0.0282
High	ISTPVIRTF	12	1	1	Q9NZB2		0	2.10719e+07	0	0.0009095	2.18713	2	1033.6	-0.874888	68.4703	0	C1203	77.78	C1203	0.0735
High	ETIPGPDAKV	21	1	1	Q8TDP1		0	2.64646e+07	0	0.0003007	2.07826	2	1026.55	-1.29134	50.7549	0	C1203	48.57	A6802	0.0331
High	ETYPDPVRV	51	1	1	P49588		0	2.41633e+08	0	0.001236	2.06774	2	1075.54	-0.769916	57.7777	0	C1203	85.19	A6802	0.0048
High	FLFDGSPTYV	11	1	1	P49327		0	2.12707e+06	0	0.001338	2.05451	2	1145.55	-0.384427	94.55	0	C1203	54.29	A6802	0.235
High	FAFPGSTNSL	4	1	1	P16144		0	1.13202e+06	0	0.000456	2.05346	2	1040.5	-0.208648	82.0127	0	C1203	82.86	C1203	0.0393
High	NTIDPSHPm	17	1	1	P49588	M9(Oxidation)	0	2.64625e+06	0	0.00045	2.03568	2	1027.45	-0.380521	35.3135	0	C1203	62.96	A6802	0.0196
High	YTTDFIYQL	15	1	1	Q01813		0	1.02004e+07	0	8.877e-05	1.93694	2	1163.56	-0.204711	93.1589	0	C1203	77.78	A6802	0.009
High	FTAPTFTGSFL	10	1	1	Q9NXE4		0	719089	0	0.0004242	1.91596	2	1188.59	-0.245654	99.6162	0		0	A6802	1.2203
High	VmAPRTLIL	87	19	19	P04222;P30504;Q9TNN7;Q29963;P30505;P30508;P30510;Q29960;P30443;P04439;P13746;P30512;P16188;P16189;P10314;P16190;P30455;P30459;Q07000	M2(Oxidation)	0	4.46297e+07	0	0.001459	1.91557	2	1029.61	-0.33613	68.4678	0	C1203	55.56	C1203	0.2605
High	RQAPPTAAm	3	1	1	Q96JM2	M9(Oxidation)	0	0	0	7.781e-05	1.89961	2	958.477	-0.138495	25.8055	0	C1203	40.74	B1503	0.0031
High	YTIPPGHQV	66	1	1	Q16850		0	1.62653e+07	0	0.000741	1.6128	2	1011.53	0.516498	48.7564	0	C1203	77.78	A6802	0.0029
High	SQFGGGSQY	52	1	1	O15371		0	9.04601e+07	0.001	0.003784	3.58817	2	930.395	-0.614165	45.5328	0	C1203	44.44	B1503	0.0013
High	KQFDAGTVNY	9	1	1	P52756		0	1.87494e+06	0.001	0.001681	3.51533	2	1142.55	-1.32259	50.2454	0	C1203	42.86	B1503	0.0033
High	GKAPGAEEY	34	1	1	P09543		0	1.7728e+07	0.001	0.001846	3.5109	2	921.431	-0.220774	29.5366	0	C1203	51.85	B1503	0.0978
High	GKSPLFGQYF	2	1	1	Q5VT66		0	343442	0.001	0.002241	3.37573	2	1143.58	-1.44167	79.0509	0	C1203	37.14	B1503	0.6991
High	GKLKQFDAY	26	1	1	Q9Y282		0	5.41721e+06	0.001	0.003571	3.3641	2	1069.57	-0.833272	44.2126	0	C1203	37.04	B1503	0.2617
High	AKSGVGTAL	9	1	1	P02786		0	2.96133e+06	0.001	0.002244	3.34336	2	803.462	0.0180492	35.2744	0	C1203	48.15	B1503	0.1989
High	DQAEIRSLV	20	2	2	P09913;O14879		0	9.28312e+06	0.001	0.004054	3.2568	2	1030.55	-0.966365	61.3571	0	C1203	44.44	A6802	0.5213
High	DSSEIHFKV	19	1	1	P63165		0	5.89876e+06	0.001	0.002911	3.24334	2	1061.53	-0.75653	54.9576	0	C1203	74.07	A6802	0.0528
High	DVSKIFQVV	20	1	1	Q5TF58		0	6.57508e+06	0.001	0.002719	3.24024	2	1034.59	-0.884892	83.1446	0	C1203	44.44	A6802	0.1308
High	GKSFGTSSY	1	1	1	A8MT65		0	820755	0.001	0.004324	3.21604	2	933.431	-0.131121	37.7648	0	C1203	40.74	B1503	0.0574
High	LKSPGSVVF	14	1	1	O75787		0	4.43251e+06	0.001	0.002936	3.21163	2	933.539	-1.36059	61.3589	0	C1203	48.15	B1503	0.01
High	SAADVVVVH	2	1	1	P09110		0	705985	0.001	0.004555	3.18028	2	896.484	0.043366	45.8264	0	C1203	55.56	C1203	1.6159
High	LAAYHPWVV	25	1	1	Q5TA50		0	9.28574e+06	0.001	0.002075	3.1794	2	1055.57	-0.349736	72.6579	0	C1203	85.19	C1203	0.6113
High	AVANIVNSV	15	1	1	Q9BRQ8		0	5.19874e+06	0.001	0.003071	3.17316	2	886.499	0.0845032	65.7983	0	C1203	48.15	A6802	0.0195
High	LKDPANFQY	2	1	1	P15559		0	1.93408e+06	0.001	0.002413	3.1568	2	1095.55	-0.267302	58.344	0	C1203	44.44	B1503	0.2339
High	DVDVSLPKV	11	1	1	Q09666		0	2.99431e+06	0.001	0.002303	3.1551	2	971.541	-0.336983	71.1868	0	C1203	37.04	A6802	0.6227
High	SAFDHFASV	12	1	1	Q9Y547		0	7.59725e+06	0.001	0.002326	3.15476	2	980.447	0.239716	65.248	0	C1203	81.48	C1203	0.0055
High	VKTGTITTF	33	1	1	P13639		0	9.28101e+07	0.001	0.003276	3.15051	2	967.545	-0.594923	52.8018	0	C1203	44.44	B1503	0.0132
High	GQFASDVQF	15	1	1	Q02833		0	6.13371e+06	0.001	0.003521	3.14773	2	998.457	-0.447967	71.9599	0	C1203	37.04	B1503	0.0109
High	GKNPDEVSY	16	1	1	O95391		0	1.54271e+07	0.001	0.002379	3.13436	2	1008.46	-0.541598	36.5977	0	C1203	48.15	B1503	0.077
High	GKSTSIQSF	23	1	1	P13797		0	1.01029e+07	0.001	0.004304	3.12743	2	954.488	-0.702346	42.4634	0	C1203	37.04	B1503	0.0291
High	AQLERQLQF	5	1	1	Q6P1N0		0	1.17054e+06	0.001	0.002054	3.12693	2	1132.61	-0.298424	61.6041	0	C1203	40.74	B1503	0.0059
High	KAFDFPSSF	10	1	1	Q7L945		0	3.1065e+06	0.001	0.002411	3.12001	2	1045.5	-2.12301	77.1218	0	C1203	77.78	C1203	0.0036
High	GKAPLNVQF	11	1	1	O75369		0	7.0588e+06	0.001	0.00278	3.11998	2	973.546	-0.161248	63.121	0	C1203	44.44	B1503	0.0364
High	YTFFTPNNI	54	1	1	P17844		0	9.53983e+07	0.001	0.004264	3.11807	2	1116.54	-0.549298	88.0878	0	C1203	70.37	A6802	0.0343
High	YKKQFSQY	5	1	1	P46777		0	4.30605e+06	0.001	0.00377	3.11337	2	1091.55	-0.542439	33.6694	0	C1203	43.33	B1503	1.1827
High	TTISKVSQV	15	1	1	Q9UNX4		0	4.21738e+06	0.001	0.00225	3.10644	2	962.55	-1.30763	41.1633	0	C1203	74.07	A6802	0.0155
High	EVSNIVKEAI	17	1	1	P63172		0	7.29308e+06	0.001	0.00343	3.1064	2	1101.61	-0.695242	63.1908	0	C1203	11.43	A6802	0.435
High	TASKVIVAV	15	1	1	Q8TEM1		0	2.60343e+07	0.001	0.002221	3.10594	2	887.556	-0.427735	51.785	0	C1203	85.19	A6802	0.0318
High	AmRIGAEVY	1	2	2	P06733;P13929	M2(Oxidation)	0	1.08972e+06	0.001	0.00406	3.1024	2	1025.51	-0.382309	47.5695	0	C1203	44.44	B1503	0.0396
High	LVASVRVPA	24	1	1	P42126		0	1.89979e+07	0.001	0.002427	3.10229	2	911.567	-0.828662	55.5432	0	C1203	11.11	A6802	0.6912
High	AAFAYTVKY	41	1	1	Q8N2K1		0	4.54204e+07	0.001	0.003327	3.09661	2	1033.53	-1.06819	63.2244	0	C1203	85.19	C1203	0.0287
High	YAKLIAEL	20	1	1	Q8NI27		0	6.33024e+06	0.001	0.003817	3.09406	2	920.545	-0.23011	69.694	0	C1203	93.33	C1203	1.1616
High	DVAQIFNNI	9	1	1	Q9Y376		0	1.29677e+06	0.001	0.002272	3.08934	2	1033.53	-0.623158	92.9791	0	C1203	33.33	A6802	0.0325
High	DVATITKTV	4	1	1	P57740		0	1.95325e+06	0.001	0.003644	3.08225	2	947.54	-0.592622	53.6351	0	C1203	48.15	A6802	0.0298
High	AKAGITTTL	15	1	1	P33992		0	5.56941e+06	0.001	0.004528	3.08141	2	875.52	-0.0701482	47.0574	0	C1203	51.85	B1503	0.1159
High	TNSSVIVRV	8	1	1	Q8NI29		0	2.72929e+06	0.001	0.002164	3.08136	2	974.562	-0.487128	51.98	0	C1203	51.85	A6802	0.6352
High	ELFSGGNTGI	10	2	2	O00571;O15523		0	2.81476e+06	0.001	0.00361	3.07646	2	994.484	-0.301753	71.7732	0	C1203	25.71	A6802	0.6754
High	GKFQDNFEF	14	2	2	Q15691;Q9UPY8		0	6.27308e+06	0.001	0.001921	3.07265	2	1131.51	-0.157069	69.3583	0	C1203	37.04	B1503	0.0536
High	HSVYIPNKV	13	1	1	Q8TB22		0	2.24109e+06	0.001	0.004562	3.06469	2	1056.58	-0.592371	45.7701	0	C1203	70.37	A6802	0.094
High	QQFPAFNSY	23	1	1	Q8N5U6		0	3.53601e+06	0.001	0.004568	3.05884	2	1101.5	0.476241	76.4539	0	C1203	48.15	B1503	0.0013
High	GKLKDPANF	5	1	1	P15559		0	1.40464e+06	0.001	0.002067	3.05375	2	989.541	-0.822894	41.2572	0	C1203	33.33	B1503	0.2023
High	ETFPANIQV	36	1	1	Q5VYK3		0	1.84067e+08	0.001	0.003333	3.04796	2	1018.52	-0.177772	77.5706	0	C1203	81.48	A6802	0.0025
High	AVAAVLTQV	12	1	1	Q99720		0	1.45424e+06	0.001	0.004028	3.04057	2	871.525	0.111996	72.0371	0	C1203	44.44	A6802	0.0366
High	NAYSRILQA	15	1	1	O15230		0	5.47515e+06	0.001	0.003985	3.01787	2	1035.56	-0.753849	56.6422	0	C1203	51.85	A6802	0.3968
High	LKPGmVVTF	14	2	2	P68104;Q5VTE0	M5(Oxidation)	0	6.19249e+06	0.001	0.004203	3.01428	2	1007.56	-0.0411829	65.8471	0	C1203	44.44	B1503	0.3724
High	KKSDPVVSY	32	1	1	P13639		0	4.25383e+07	0.001	0.001909	3.01314	2	1022.55	-1.17122	35.404	0	C1203	51.85	B1503	0.0042
High	YKLLGGLAV	35	1	1	P23396		0	3.80481e+07	0.001	0.002955	3.01117	2	933.576	-0.51389	78.1396	0	C1203	44.44	B1503	0.9261
High	EVIAEAVGV	6	1	1	O15226		0	2.36654e+06	0.001	0.002337	3.00466	2	886.488	-0.133857	69.5897	0	C1203	40.74	A6802	0.0058
High	TASPVIKAV	22	1	1	Q8WU10		0	8.57809e+07	0.001	0.002507	3.00364	2	885.541	0.0819921	48.1525	0	C1203	92.59	A6802	0.084
High	AAAPHTVSY	5	1	1	O75907		0	984730	0.001	0.001847	3.00005	2	916.452	-0.0809956	38.4812	0	C1203	92.59	C1203	0.006
High	ASFDGRISVY	3	1	1	O94979		0	2.33624e+06	0.001	0.002686	2.99932	2	1114.55	-0.775037	63.9454	0	C1203	80	B1503	0.1962
High	KAFGWPSSL	13	1	1	Q9HAH1		0	2.95743e+06	0.001	0.004284	2.99558	2	992.519	-0.588927	74.1055	0	C1203	85.19	C1203	0.0051
High	VAADTVKEL	7	1	1	Q86VI3		0	1.16436e+06	0.001	0.003149	2.99558	2	945.525	-0.384366	47.2757	0	C1203	96.3	C1203	0.0524
High	GQKPGGSDF	19	2	2	P56211;O43768		0	61878859	0.001	0.003891	2.98152	2	892.415	-1.26486	30.7042	0	C1203	37.04	B1503	0.014
High	KKHSQFIGY	5	4	4	Q58FF7;Q58FG0;P07900;P08238		0	2.06171e+06	0.001	0.002997	2.98121	2	1107.59	-0.376934	36.9087	0	C1203	44.44	B1503	0.0501
High	TVSEVIQGL	20	1	1	Q8WWW0		0	3.96304e+06	0.001	0.003933	2.97103	2	945.525	-0.115584	76.0766	0	C1203	48.15	A6802	0.0154
High	GKVDGLAAL	9	1	1	Q3KQZ1		0	1.56243e+06	0.001	0.004499	2.97005	2	843.494	0.814379	58.5747	0	C1203	40.74	B1503	0.4078
High	GAYGQAVRY	21	1	1	Q9UID3		0	5.72012e+06	0.001	0.004323	2.96889	2	984.489	-0.359393	43.7535	0	C1203	85.19	C1203	0.0963
High	DASPVTNNTI	19	1	1	O15164		0	9.11587e+06	0.001	0.002746	2.96827	2	1031.5	-0.243947	53.5663	0	C1203	45.71	A6802	1.0622
High	SAYDNVNKV	13	1	1	P28482		0	2.94147e+06	0.001	0.001675	2.9672	2	1009.49	-0.85701	40.0612	0	C1203	85.19	C1203	0.0091
High	DIANFQVLV	18	1	1	Q8IY34		0	2.87124e+06	0.001	0.002053	2.96618	2	1018.56	-0.909654	97.6875	0	C1203	44.44	A6802	0.0341
High	AQKIGIVGF	7	1	1	Q96DG6		0	820934	0.001	0.001777	2.96158	2	932.556	-0.378988	70.6631	0	C1203	40.74	B1503	0.0094
High	VQRQGVSY	7	1	1	Q8IVT2		0	1.23425e+06	0.001	0.004286	2.95989	2	936.489	-0.377814	33.4606	0	C1203	30	B1503	0.051
High	EAAEVILRV	43	1	1	P78371		0	2.61329e+08	0.001	0.003433	2.9564	2	999.582	-1.05875	68.1442	0	C1203	88.89	A6802	0.0081
High	GKFPSLLTH	48	1	1	P62906		0	8.34272e+07	0.001	0.004014	2.94907	2	999.562	-0.599491	57.3034	0	C1203	18.52	B1503	0.9746
High	STSDIITRI	17	2	2	P49585;Q9Y5K3		0	2.62435e+08	0.001	0.003245	2.9442	2	1005.56	-1.09115	62.2813	0	C1203	70.37	A6802	0.0093
High	KTPDFILQV	12	1	1	Q9Y2V0		0	5.86152e+06	0.001	0.003514	2.94416	2	1060.6	-1.00185	78.3897	0	C1203	77.78	A6802	0.1542
High	TKISTHVSF	17	1	1	Q8TEY7		0	4.59153e+06	0.001	0.00285	2.94176	2	1019.55	-0.480632	47.3672	0	C1203	37.04	B1503	0.0192
High	GKSTVINAm	21	1	1	O95140	M9(Oxidation)	0	1.51551e+06	0.001	0.001723	2.93965	2	936.482	-0.353791	33.913	0	C1203	37.04	B1503	0.2775
High	ITVSIIKEL	11	1	1	Q8TED0		0	4.62559e+06	0.001	0.004427	2.93568	2	1015.64	-0.363716	79.0725	0	C1203	81.48	C1203	0.2229
High	SKKPESTSF	13	1	1	Q9BT25		0	4.80192e+06	0.001	0.002703	2.93495	2	1010.51	-0.63855	26.0307	0	C1203	37.04	B1503	0.0119
High	TTFESSHYLL	12	1	1	Q16531		0	4.61902e+06	0.001	0.004324	2.91827	2	1197.58	-0.501655	69.2698	0	C1203	54.29	A6802	0.0976
High	LQHPDVAAY	2	1	1	P35221		0	4.76191e+06	0.001	0.004123	2.91826	2	1013.5	-2.51727	49.7001	0	C1203	48.15	B1503	0.0027
High	GKmNPQSAF	13	1	1	P22307	M3(Oxidation)	0	1.11394e+06	0.001	0.003257	2.90886	2	995.46	-1.42215	38.5839	0	C1203	29.63	B1503	0.0163
High	NVAEINRQV	13	1	1	O43933		0	2.6441e+06	0.001	0.003317	2.90576	2	1042.56	-0.369348	43.1941	0	C1203	48.15	A6802	0.0092
High	EVLGPLAQV	5	1	1	Q8N196		0	1.03115e+06	0.001	0.003825	2.90146	2	925.535	-0.565794	81.1597	0	C1203	40.74	A6802	0.006
High	EVAELFQRL	5	1	1	Q4V328		0	1.93252e+07	0.001	0.004423	2.90012	2	1104.6	-2.37266	78.0511	0	C1203	44.44	A6802	0.0205
High	GQNAQTmAY	21	1	1	O75534	M7(Oxidation)	0	6.30337e+06	0.001	0.003598	2.89839	2	999.42	-0.331159	35.246	0	C1203	37.04	B1503	0.0083
High	AQKPFGATY	16	1	1	Q96QD5		0	6.44831e+06	0.001	0.002002	2.89478	2	982.499	-0.534799	46.726	0	C1203	51.85	B1503	0.0009
High	VAQAPWKAV	9	1	1	P31327		0	2.1509e+06	0.001	0.00322	2.88765	2	969.551	-0.942175	56.7239	0	C1203	81.48	C1203	1.2564
High	SSYGNIRAV	2	1	1	Q8N122		0	1.80406e+06	0.001	0.002875	2.88174	2	966.5	-0.251077	46.6195	0	C1203	81.48	C1203	0.0147
High	SISDVIAQV	35	1	1	Q9HCJ1		0	5.06805e+07	0.001	0.003876	2.88143	2	931.509	-0.418099	79.7428	0	C1203	48.15	A6802	0.01
High	FTFGSKVTY	11	1	1	Q4LDE5		0	2.5317e+06	0.001	0.003287	2.87927	2	1049.53	-0.980341	64.701	0	C1203	85.19	C1203	0.0093
High	KSFGSAQEF	9	1	1	P35606		0	2.29765e+06	0.001	0.002385	2.87499	2	1000.47	-0.411046	47.5731	0	C1203	70.37	B1503	0.0601
High	FLKPDDIQY	6	1	1	O75533		0	2.03057e+06	0.001	0.002082	2.86971	2	1138.58	-0.332918	65.8918	0	C1203	51.85	B1503	0.1694
High	TAQTLVRIL	12	1	1	Q12905		0	3.43588e+06	0.001	0.003176	2.8669	2	1014.63	-0.770649	70.8284	0	C1203	81.48	C1203	1.0533
High	AKLPEIEEY	2	1	1	Q9BQ39		0	1.53412e+06	0.001	0.002805	2.86213	2	1091.56	-1.14035	62.0453	0	C1203	55.56	B1503	0.0512
High	DVADVLLQA	15	2	2	Q8IWZ3;O75179		0	1.64298e+06	0.001	0.001671	2.86047	2	943.509	-0.358691	87.1994	0	C1203	11.11	A6802	0.0316
High	KKPPGAQLGF	9	1	1	Q5EBL8		0	1.9385e+06	0.001	0.002825	2.85192	2	1042.6	-0.50054	46.4365	0	C1203	40	B1503	1.5459
High	YKIDPSTL	15	1	1	O15294		0	6.45557e+06	0.001	0.001789	2.85113	2	936.504	0.139325	59.5137	0	C1203	43.33	B1503	1.6411
High	DTSPVFQRL	18	1	1	Q9NU22		0	5.25173e+06	0.001	0.002819	2.84799	2	1062.56	-1.00795	65.4634	0	C1203	77.78	A6802	0.0678
High	ITADVNHNL	15	1	1	Q16222		0	6.9999e+06	0.001	0.00378	2.84511	2	996.51	-0.560717	46.4655	0	C1203	74.07	A6802	0.0184
High	ETFAFQAEI	36	5	5	Q58FF8;Q58FF7;Q14568;P07900;P08238		0	2.98556e+07	0.001	0.002575	2.82597	2	1055.5	-0.124339	86.2168	0	C1203	66.67	A6802	0.0102
High	EIVDFAKQV	6	1	1	P55055		0	1.33363e+06	0.001	0.003252	2.82288	2	1048.57	-1.01045	66.167	0	C1203	44.44	A6802	0.038
High	YQKQPKIGY	4	1	1	Q68E01		0	1.72448e+06	0.001	0.002086	2.81964	2	1124.61	-0.0911341	38.1856	0	C1203	44.44	B1503	0.0059
High	FSKDIFSVI	30	1	1	Q01650		0	1.94658e+07	0.001	0.003581	2.80817	2	1055.58	-0.94908	85.872	0	C1203	70.37	C1203	0.11
High	VKAPSSQTF	10	1	1	Q86TC9		0	2.5176e+06	0.001	0.004289	2.80302	2	964.51	-0.176407	42.1474	0	C1203	48.15	B1503	0.0054
High	NVIDNPWGV	13	1	1	Q5TGY1		0	2.78184e+06	0.001	0.001753	2.79541	2	1013.5	-0.429233	84.041	0	C1203	44.44	A6802	0.0058
High	SQIYQSIEF	3	1	1	Q14152		0	1.08944e+06	0.001	0.00192	2.79276	2	1114.54	-0.647995	81.4773	0	C1203	37.04	B1503	0.0108
High	EVYEKPVQV	25	1	1	Q9Y508		0	2.97295e+07	0.001	0.002847	2.78441	2	1090.58	-0.235639	49.189	0	C1203	51.85	A6802	0.0058
High	GKTDPGTVF	11	1	1	Q9NYK5		0	1.92087e+06	0.001	0.003466	2.77885	2	921.468	-0.10245	47.6853	0	C1203	37.04	B1503	0.0438
High	EIAQVVEKV	16	1	1	Q9BYK8		0	7.91282e+06	0.001	0.004158	2.7754	2	1014.58	-0.527513	56.4128	0	C1203	44.44	A6802	0.0187
High	AmNPTNTVF	49	1	1	P11142	M2(Oxidation)	0	4.16307e+07	0.001	0.004089	2.77214	2	1010.46	-1.30617	59.0351	0	C1203	44.44	B1503	0.0048
High	YLGEFSITY	12	1	1	P62841		0	1.27755e+06	0.001	0.004337	2.77195	2	1092.52	-0.440914	89.3832	0	C1203	51.85	B1503	0.131
High	NSYVSPRIL	3	1	1	Q9H992		0	6.94636e+06	0.001	0.004131	2.77161	2	1048.58	-1.45658	62.0739	0	C1203	77.78	C1203	0.2514
High	GKAPNILLY	6	1	1	P50747		0	2.61989e+06	0.001	0.003466	2.7623	2	988.582	-0.250131	68.4509	0	C1203	55.56	B1503	0.0213
High	AQSPELRTY	5	1	1	Q5T280		0	1.20175e+06	0.001	0.003557	2.76209	2	1064.54	-0.663902	44.0432	0	C1203	59.26	B1503	0.0034
High	SAIDRIFTL	20	1	1	Q86TU7		0	5.19389e+06	0.001	0.003197	2.76002	2	1035.58	-0.894415	85.0002	0	C1203	85.19	C1203	0.0032
High	LQAPPLTSL	14	1	1	Q96EX3		0	2.57567e+06	0.001	0.003274	2.75828	2	939.551	-0.443395	81.3137	0	C1203	48.15	B1503	0.0282
High	FAFEHSEEY	5	1	1	Q9BQ70		0	1.97427e+06	0.001	0.004496	2.74794	2	1158.47	-0.683003	58.667	0	C1203	88.89	C1203	0.0071
High	SVIDIINGEA	8	1	1	Q7L5N1		0	2.48128e+06	0.001	0.002522	2.74291	2	1030.54	-0.256114	80.9917	0	C1203	5.71	A6802	0.1329
High	MASALVHIL	14	1	1	Q5VWQ8		0	1.95175e+06	0.001	0.002525	2.72894	2	954.544	-0.10199	76.7878	0	C1203	81.48	C1203	0.1674
High	AKLPTGTTL	5	1	1	P54098		0	2.40754e+06	0.001	0.001964	2.7201	2	901.535	-0.36666	52.5552	0	C1203	51.85	B1503	0.0734
High	ETSSImQKL	56	1	1	Q5VT06	M6(Oxidation)	0	7.62005e+06	0.001	0.002114	2.72007	2	1052.53	-0.52462	47.6155	0	C1203	74.07	A6802	0.0607
High	VTYVPVTTF	9	1	1	P62899		0	2.98079e+06	0.001	0.002619	2.71849	2	1026.55	-0.659435	82.8116	0	C1203	74.07	C1203	0.0271
High	SAFPFPVTV	25	1	1	Q96K37		0	7.56323e+06	0.001	0.002721	2.71441	2	964.514	-0.30471	98.7974	0	C1203	96.3	C1203	0.0042
High	SKKIDRHmY	4	1	1	P84098	M8(Oxidation)	0	6123.41	0.001	0.004263	2.71346	2	1193.61	0.0590137	15.1705	0	C1203	37.04	B1503	0.5279
High	EVVDKINQV	15	1	1	Q8WXH0		0	7.90925e+06	0.001	0.001714	2.69866	2	1043.57	-0.617049	48.6368	0	C1203	44.44	A6802	0.0052
High	FAFFDPVmY	3	1	1	O95071	M8(Oxidation)	0	252849	0.001	0.002663	2.69172	2	1152.51	-0.18461	101.951	0	C1203	88.89	C1203	0.0372
High	KATNVVRLL	16	1	1	Q9NYU1		0	6.8981e+06	0.001	0.001854	2.68571	2	1013.65	-0.89063	53.3935	0	C1203	81.48	C1203	0.229
High	EVSPVSRQSI	17	1	1	Q9H6S3		0	7.2718e+06	0.001	0.003292	2.68546	2	1101.59	-0.682989	46.1702	0	C1203	20	A6802	0.3148
High	TVADKIHSV	5	1	1	O95147		0	2.25214e+06	0.001	0.002731	2.68321	2	969.536	-0.364049	37.8483	0	C1203	48.15	A6802	0.0033
High	DTTYINHVV	42	1	1	Q9UBR2		0	1.26479e+08	0.001	0.002097	2.68238	2	1061.53	-0.73769	57.8155	0	C1203	70.37	A6802	0.0533
High	AKTSASLEm	1	1	1	Q9H410	M9(Oxidation)	0	163451	0.001	0.003497	2.68134	2	953.461	-0.269977	27.9304	0	C1203	44.44	B1503	0.4021
High	RKLEAAEDIAY	14	1	1	P35232		0	6.43856e+06	0.001	0.003173	2.67775	2	1278.67	-0.501155	49.3738	0		0	B1503	0.652
High	AAFRIVVm	21	1	1	Q8WUI4	M8(Oxidation)	0	5.02306e+06	0.001	0.003079	2.67422	2	922.518	-0.28134	63.0403	0	C1203	80	C1203	0.9346
High	EIFSKNYRV	14	1	1	Q9NVU0		0	5.036e+06	0.001	0.002892	2.66984	2	1155.61	-1.22523	50.3649	0	C1203	44.44	A6802	0.0224
High	ESADIARAEV	10	1	1	A6NKF1		0	1.71072e+06	0.001	0.003093	2.6668	2	1060.53	-0.658715	46.2972	0	C1203	51.43	A6802	0.0396
High	AQRQDIAFAY	11	1	1	P07355		0	3.27832e+06	0.001	0.003728	2.66614	2	1182.59	-0.0894736	60.4656	0	C1203	31.43	B1503	0.023
High	GTYFNPHTV	9	1	1	O60294		0	7.18194e+06	0.001	0.002628	2.66546	2	1035.49	0.104542	54.0803	0	C1203	77.78	A6802	0.1452
High	AKFSLPVSL	15	1	1	Q12980		0	3.14677e+06	0.001	0.0041	2.66462	2	961.572	-0.230387	81.9339	0	C1203	55.56	B1503	0.0876
High	VQIPPSTTY	31	1	1	Q12906		0	1.85776e+06	0.001	0.002311	2.66237	2	1005.52	-0.392296	63.0607	0	C1203	51.85	B1503	0.0007
High	LQILGTNSF	9	1	1	Q9Y2G0		0	2.02437e+06	0.001	0.003007	2.65101	2	992.541	0.0856682	77.7726	0	C1203	29.63	B1503	0.0053
High	GQNGGILVY	6	1	1	Q86XK2		0	2.55501e+06	0.001	0.004289	2.6471	2	920.484	-0.145824	69.4174	0	C1203	51.85	B1503	0.0056
High	TVADVDEKA	4	1	1	Q13118		0	2.22048e+06	0.001	0.0035	2.64218	2	947.468	-0.521817	33.7496	0	C1203	7.41	A6802	0.1722
High	SQANIAQVL	6	2	2	Q10567;P63010		0	1.38612e+06	0.001	0.004167	2.64074	2	943.521	-0.0888358	70.0695	0	C1203	44.44	B1503	0.0614
High	IQNDRQLQY	5	1	1	Q9UBB9		0	1.30589e+06	0.001	0.00409	2.63676	2	1177.6	-0.143093	43.386	0	C1203	44.44	B1503	0.0071
High	STFFQETNI	10	1	1	Q8IYN6		0	1.90405e+06	0.001	0.004056	2.63566	2	1086.51	-0.8526	78.7107	0	C1203	62.96	A6802	0.1368
High	DVNLPGVNV	11	1	1	Q09666		0	2.13789e+06	0.001	0.002685	2.63106	2	926.494	-0.365088	78.804	0	C1203	40.74	A6802	0.0715
High	DLAPIGIRV	6	1	1	Q99714		0	1.68336e+06	0.001	0.003156	2.62692	2	953.577	-0.739598	77.0243	0	C1203	51.85	A6802	0.065
High	GQWGGGSHY	48	1	1	B1AH88		0	5.36242e+07	0.001	0.003979	2.62079	2	948.395	-0.729759	39.3889	0	C1203	40.74	B1503	0.0081
High	SAYARLIDY	11	1	1	P34897		0	3.47359e+06	0.001	0.002735	2.61571	2	1071.55	-0.605716	65.7183	0	C1203	81.48	C1203	0.0352
High	SIAQIIVTV	15	1	1	Q9UNQ0		0	2.67039e+06	0.001	0.003805	2.60688	2	943.582	-0.171067	90.4741	0	C1203	51.85	A6802	0.0211
High	IASAIVNEL	13	1	1	Q9NR09		0	3.70904e+06	0.001	0.004001	2.60199	2	929.53	-0.471792	75.9886	0	C1203	85.19	C1203	0.052
High	TAAPPAQPL	7	1	1	P25440		0	4.33615e+06	0.001	0.004092	2.59091	2	865.478	0.128914	51.8978	0	C1203	85.19	C1203	0.1455
High	EIANILQEL	9	1	1	Q49AM1		0	829731	0.001	0.003247	2.58949	2	1042.58	-0.373164	98.7876	0	C1203	44.44	A6802	0.0291
High	YLLPDTKAY	12	1	1	P14625		0	2.23662e+06	0.001	0.003985	2.58562	2	1083.57	-1.50348	64.3157	0	C1203	51.85	B1503	0.0331
High	RSTKTGTAY	5	1	1	P17844		0	9.1455e+06	0.001	0.002225	2.58555	2	984.51	-0.433403	18.3166	0	C1203	66.67	B1503	0.2802
High	FGVDRAILY	13	1	1	P06756		0	3.82534e+06	0.001	0.002718	2.585	2	1053.57	0.000194576	72.2378	0	C1203	48.15	C1203	0.0963
High	EVFQGVEKL	16	1	1	Q9Y330		0	7.02021e+06	0.001	0.002293	2.58456	2	1048.57	-1.01045	63.3617	0	C1203	44.44	A6802	0.0422
High	ETVGILHKV	13	1	1	Q96HH9		0	1.26389e+07	0.001	0.003064	2.58127	2	995.588	-0.0249049	48.4227	0	C1203	70.37	A6802	0.0023
High	DLIHEIYTV	6	1	1	P18124		0	1.57827e+06	0.001	0.001998	2.57904	2	1102.58	-0.334718	86.5986	0	C1203	44.44	A6802	0.2239
High	RQINWTVLY	7	1	1	P83731		0	2.86808e+06	0.001	0.003913	2.57826	2	1192.65	-0.482277	78.2154	0	C1203	40.74	B1503	0.0094
High	GKAAAAVAF	9	1	1	Q8NEB5		0	1.40473e+06	0.001	0.004369	2.57279	2	805.456	-0.692749	47.0578	0	C1203	37.04	B1503	0.0233
High	LSADIFQQV	20	1	1	O94916		0	1.28506e+07	0.001	0.002238	2.56604	2	1020.54	-0.740181	84.9863	0	C1203	74.07	A6802	0.0684
High	FAYEGPmYL	31	1	1	Q96MT1	M7(Oxidation)	0	2.07212e+06	0.001	0.004003	2.5636	2	1106.49	0.136915	83.1297	0	C1203	88.89	C1203	0.0008
High	HVASVVNQSV	5	1	1	P15822		0	1.40558e+06	0.001	0.003622	2.56266	2	1039.55	-0.796119	43.645	0	C1203	28.57	A6802	0.0697
High	NSYGSHRTL	3	1	1	Q9Y446		0	1.69084e+06	0.001	0.003178	2.552	2	1034.5	-0.364561	26.8794	0	C1203	81.48	C1203	0.0403
High	AAASIANIV	7	1	1	P17987		0	3.35984e+06	0.001	0.001802	2.54381	2	829.478	-0.0126563	72.6969	0	C1203	85.19	A6802	0.4909
High	EATDVKSTL	6	1	1	Q9NZM1		0	3.63206e+06	0.001	0.003541	2.54345	2	963.499	-0.30126	39.688	0	C1203	81.48	A6802	0.3015
High	AQVPFEQIL	43	1	1	Q99828		0	8.16238e+07	0.001	0.004522	2.54309	2	1044.57	-0.385054	91.7281	0	C1203	48.15	B1503	0.1391
High	EVIGGTNHTL	12	1	1	Q9P2E3		0	3.81826e+06	0.001	0.002387	2.50801	2	1040.54	-0.688826	47.5662	0	C1203	40	A6802	0.0727
High	SAIPHPLIM	14	1	1	P61201		0	4.2297e+06	0.001	0.004299	2.4898	2	978.544	-0.411356	70.8845	0	C1203	81.48	C1203	0.0063
High	TVTSVLEYL	20	1	1	O14893		0	5.71527e+06	0.001	0.002808	2.48895	2	1024.56	-0.171292	97.1192	0	C1203	40.74	A6802	0.0717
High	ETIMNQEKL	10	1	1	P20290		0	3.41394e+06	0.001	0.003158	2.48608	2	1105.56	-0.669338	51.9045	0	C1203	66.67	A6802	0.3546
High	EVFGHAIKA	21	1	1	P54136		0	1.78864e+07	0.001	0.003511	2.48551	2	971.531	-0.387145	44.6476	0	C1203	11.11	A6802	0.0322
High	SQLPKLLVY	4	1	1	P11117		0	1.62975e+06	0.001	0.004515	2.47837	2	1060.64	-0.765081	77.5846	0	C1203	51.85	B1503	0.0043
High	GQRFLEVQY	1	1	1	Q15149		0	1.37495e+06	0.001	0.001985	2.47381	2	1139.58	-0.020284	65.673	0	C1203	40.74	B1503	0.0855
High	QVFEGHTHYV	40	1	1	P35606		0	2.02914e+07	0.001	0.002098	2.47172	2	1216.57	-0.150325	44.5542	0	C1203	37.14	A6802	0.0215
High	AQNASRNTF	2	1	1	Q01970		0	473244	0.001	0.001692	2.46679	2	1008.49	-0.490051	27.3024	0	C1203	37.04	B1503	0.0039
High	EIFDGNVAHI	11	1	1	P46939		0	4.3112e+06	0.001	0.002621	2.45847	2	1114.55	-1.00306	69.8211	0	C1203	31.43	A6802	0.0393
High	SVFTFVAEV	7	1	1	Q7Z429		0	2.16496e+06	0.001	0.002868	2.45731	2	998.519	-0.586777	98.19	0	C1203	48.15	A6802	0.0314
High	FQNESGSKY	1	1	1	O94806		0	680864	0.001	0.003968	2.45467	2	1059.47	-0.366992	32.1891	0	C1203	44.44	B1503	0.0071
High	mPAFIFEHI	18	1	1	O00560	M1(Oxidation)	0	1.92409e+06	0.001	0.002705	2.44483	2	1120.55	-0.243001	82.511	0	C1203	33.33	A6802	0.7009
High	QAGPINREm	7	2	2	Q5VTR2;O75150	M9(Oxidation)	0	1.46686e+06	0.001	0.003597	2.44148	2	1031.49	-0.328095	30.8748	0	C1203	81.48	C1203	0.8797
High	FKVSDEVGF	1	1	1	Q6VY07		0	1.37345e+06	0.001	0.002851	2.43382	2	1027.51	-0.210565	68.6896	0	C1203	40.74	B1503	0.4935
High	ITGPLIRIL	9	1	1	Q92616		0	1.21482e+06	0.001	0.004176	2.43347	2	995.661	-0.357616	84.3366	0	C1203	81.48	C1203	0.7313
High	AAISHGRVF	5	1	1	Q9NRX2		0	1.4512e+06	0.001	0.002006	2.43221	2	957.526	-0.684922	40.1819	0	C1203	81.48	B1503	0.051
High	SAFPSNIFY	5	1	1	Q92900		0	1.61938e+06	0.001	0.002564	2.42762	2	1045.5	-0.235748	91.2776	0	C1203	88.89	C1203	0.0224
High	ITAPPTPGI	5	1	1	Q8NEZ4		0	3.84671e+06	0.001	0.002761	2.41887	2	866.498	0.112308	67.2706	0	C1203	70.37	A6802	0.0335
High	YTVQFTTmV	7	1	1	Q7Z6Z7	M8(Oxidation)	0	1103712	0.001	0.003754	2.41565	2	1105.52	0.136468	74.2225	0	C1203	70.37	A6802	0.0224
High	DAFPEAIIV	1	1	1	Q16795		0	474269	0.001	0.003416	2.41099	2	974.519	-0.486228	96.3091	0	C1203	88.89	A6802	0.3051
High	FKIEPPGLF	7	2	2	Q969P6;P11387		0	1.17715e+06	0.001	0.001792	2.40569	2	1047.59	-0.536193	85.5245	0	C1203	40.74	B1503	0.0502
High	RAFDQGADAIY	7	1	1	Q9UDW1		0	3.55555e+06	0.001	0.001829	2.40469	2	1226.58	-0.75995	57.4962	0		0	B1503	0.8623
High	EVFHAGTAL	9	1	1	P22102		0	5.07432e+06	0.001	0.002454	2.40381	2	944.483	-0.669689	56.269	0	C1203	40.74	A6802	0.0611
High	QERPSVTSY	11	1	1	Q9UJX3		0	2.83302e+06	0.001	0.001956	2.40353	2	1066.52	-0.559421	40.5996	0	C1203	48.15	B1503	0.0243
High	GKQQWQQLY	5	1	1	Q7L2H7		0	2.66387e+06	0.001	0.002855	2.3948	2	1178.59	-0.559318	58.3801	0	C1203	37.04	B1503	0.3408
High	ETYFESARV	13	1	1	Q9H3L0		0	3.19389e+06	0.001	0.003132	2.39127	2	1101.52	-0.540969	56.5551	0	C1203	70.37	A6802	0.0088
High	AKIPGTGAL	5	1	1	O75298		0	2.30743e+06	0.001	0.001717	2.3883	2	827.499	0.149276	51.891	0	C1203	48.15	B1503	0.1149
High	RLLDTTITF	9	1	1	Q8N766		0	2.12891e+06	0.001	0.001709	2.38686	2	1079.61	-1.05155	79.5803	0	C1203	40.74	B1503	0.0141
High	EIVQFFSGL	3	3	3	P31943;P55795;P52597		0	761284	0.001	0.004191	2.3791	2	1039.54	-0.915618	101.713	0	C1203	37.04	A6802	0.1446
High	EIADLNVRI	11	1	1	Q6KB66		0	3.0714e+06	0.001	0.00339	2.37417	2	1042.59	-0.0310507	72.1125	0	C1203	40.74	A6802	0.0095
High	TSVPELQIPL	4	1	1	Q96R09		0	6.0888e+06	0.001	0.001685	2.37253	2	1096.62	-0.31185	94.1334	0	C1203	54.29	A6802	2.3343
High	QVFPGLLERV	8	1	1	Q9UBB4		0	1.68413e+06	0.001	0.002716	2.36787	2	1157.67	-0.640524	82.0151	0	C1203	40	A6802	0.2207
High	EAFDRSFEV	26	1	1	Q7Z4W1		0	6.35898e+07	0.001	0.002951	2.36536	2	1099.5	-1.09253	65.5304	0	C1203	85.19	A6802	0.0048
High	EIFGAGTYVGL	2	2	2	Q309B1;O95361		0	376425	0.001	0.001879	2.35699	2	1126.58	0.0880795	92.052	0		0	A6802	0.8168
High	NQVIFPVSY	9	1	1	Q9GZZ1		0	2.17463e+06	0.001	0.004243	2.34022	2	1066.56	-0.678284	84.9093	0	C1203	44.44	B1503	0.0233
High	ETADVIAKV	45	1	1	O43617		0	2.36557e+08	0.001	0.003071	2.33889	2	945.524	-0.965331	52.4016	0	C1203	77.78	A6802	0.0012
High	LKSVNELIY	21	1	1	P18124		0	1.53175e+07	0.001	0.001929	2.33511	2	1078.61	-1.03329	66.8404	0	C1203	44.44	B1503	0.4351
High	YAYATVLTF	9	1	1	O15439		0	942031	0.001	0.002794	2.3346	2	1048.53	-0.612229	92.9302	0	C1203	85.19	C1203	0.0025
High	FSYVTPRAF	3	1	1	Q9Y4E8		0	1.39399e+06	0.001	0.003118	2.32951	2	1087.56	-0.977814	69.8281	0	C1203	74.07	C1203	0.0067
High	ETILISNNQV	4	1	1	Q9H9A6		0	2.02131e+06	0.001	0.004163	2.32092	2	1130.6	-0.27888	68.498	0	C1203	40	A6802	0.1332
High	EQADIFERV	11	1	1	O60343		0	4.94325e+06	0.001	0.002992	2.32075	2	1106.55	-1.16306	63.7341	0	C1203	44.44	A6802	0.1776
High	SSVPGVRLL	5	1	1	P08670		0	2.71687e+06	0.001	0.003752	2.31694	2	927.562	-0.327798	67.4191	0	C1203	81.48	C1203	0.0791
High	LQRATPEQY	6	1	1	P14324		0	2.03582e+06	0.001	0.003421	2.29629	2	1105.56	-0.362964	37.8949	0	C1203	40.74	B1503	0.0111
High	GQIPEIIFY	11	3	3	Q9H0C5;Q9Y2F9;Q96KE9		0	512484	0.001	0.002204	2.2944	2	1079.58	-0.353356	98.4168	0	C1203	51.85	B1503	0.0145
High	EVISKLYAV	26	1	1	P50990		0	3.50766e+08	0.001	0.002221	2.28914	2	1021.59	-1.05508	65.7423	0	C1203	40.74	A6802	0.0052
High	QTYGYEHIL	10	1	1	Q96AX1		0	3.44794e+06	0.001	0.002348	2.28153	2	1123.54	-0.81897	64.0857	0	C1203	74.07	A6802	0.1803
High	SSFPTVVIY	25	1	1	Q9HCN4		0	5.18237e+07	0.001	0.004133	2.27498	2	1012.53	-0.523314	89.475	0	C1203	85.19	C1203	0.0227
High	AAQPQPSVA	17	1	1	Q96KR1		0	1.86686e+07	0.001	0.002585	2.23115	2	868.453	0.17262	36.8715	0	C1203	55.56	C1203	2.9014
High	SQYQGVVVY	21	1	1	Q9Y221		0	7.73181e+07	0.001	0.00338	2.2136	2	1042.52	-1.02309	65.8202	0	C1203	51.85	B1503	0.0007
High	DTFYVQVLV	12	1	1	Q5BJD5		0	1.71429e+06	0.001	0.00373	2.20352	2	1083.57	-0.273501	99.503	0	C1203	74.07	A6802	0.0353
High	VVKPPGSSL	11	1	1	Q92560		0	7.22335e+06	0.001	0.002414	2.18326	2	883.525	-0.0967694	45.7797	0	C1203	48.15	C1203	0.0379
High	NVFEGFYGV	3	1	1	Q9Y5Y0		0	1.13763e+06	0.001	0.002221	2.18278	2	1031.48	0.604001	91.905	0	C1203	44.44	A6802	0.0032
High	ESAGLGYRV	12	1	1	Q63HN8		0	5.67412e+06	0.001	0.002515	2.15213	2	951.487	-2.47313	49.8611	0	C1203	74.07	A6802	0.0202
High	RKIGDTSVSY	15	1	1	P20700		0	6.10709e+06	0.001	0.003659	2.13727	2	1125.59	-1.20179	41.0205	0	C1203	37.14	B1503	0.0209
High	YTTTIEAFI	11	1	1	P07814		0	4.35562e+06	0.001	0.00343	2.13607	2	1058.54	-0.603453	91.5584	0	C1203	62.96	A6802	0.075
High	YSSPEILRV	4	1	1	Q2MV58		0	1.23909e+06	0.001	0.002896	2.09677	2	1063.58	-0.437121	66.0428	0	C1203	88.89	C1203	0.2389
High	ETYPDAVKI	10	1	1	Q8WV22		0	6.43868e+06	0.001	0.003597	2.0416	2	1035.54	0.18828	58.9596	0	C1203	74.07	A6802	0.0167
High	TTFNIDDQYL	6	1	1	Q14697		0	1.58662e+06	0.001	0.00386	2.03135	2	1229.57	0.129976	83.6283	0	C1203	57.14	A6802	0.4507
High	EIFPVSFHV	12	1	1	Q5THK1		0	4.05504e+06	0.001	0.003327	2.02837	2	1074.56	0.0334529	87.4262	0	C1203	48.15	A6802	0.0055
High	NAFPEIFYT	26	1	1	Q99570		0	4.14314e+06	0.001	0.003104	2.00427	2	1101.52	-0.311775	93.7394	0	C1203	51.85	A6802	0.2743
High	EVIGKITAL	8	1	1	O43264		0	1.01146e+07	0.001	0.002563	1.99793	2	943.582	-0.0522962	66.2306	0	C1203	44.44	A6802	0.0198
High	ESAPIGIRV	12	1	1	O75054		0	4.84304e+06	0.001	0.003867	1.97471	2	941.541	-0.281422	60.621	0	C1203	81.48	A6802	0.0083
High	ETAPRTIFQRV	3	1	1	Q9UBB4		0	1.99437e+07	0.001	0.0028	1.87626	3	1317.73	-0.0468293	55.9739	0		0	A6802	0.5705
High	ETFKNSFVEA	16	1	1	Q6NUM9		0	1.11347e+07	0.001	0.003007	1.85839	2	1171.56	-0.20448	58.2037	0	C1203	25.71	A6802	0.2715
High	TTTQITKTV	16	1	1	P11171		0	6.36175e+06	0.002	0.005339	3.23565	2	992.561	-1.02305	38.7008	0	C1203	74.07	A6802	0.0922
High	SKYPASSSVF	1	1	1	P09629		0	1.98671e+06	0.002	0.005099	3.14321	2	1072.53	-1.41232	52.1513	0	C1203	40	B1503	0.0308
High	TTVDINTQV	22	1	1	Q14676		0	3.19824e+07	0.002	0.00656	3.11726	2	990.51	-0.503893	59.3307	0	C1203	70.37	A6802	0.0027
High	GQRKPATSY	33	1	1	P46779		0	8.3801e+07	0.002	0.005502	3.10723	2	1007.53	-0.4223	20.9663	0	C1203	37.04	B1503	0.0046
High	KQFQSPSTL	15	1	1	Q8NAP3		0	2.98592e+06	0.002	0.006695	3.08937	2	1035.55	-0.75431	46.5702	0	C1203	48.15	B1503	0.0128
High	STFEDVTQV	9	1	1	Q14247		0	3.76743e+06	0.002	0.004849	3.04063	2	1025.48	-1.36605	66.2047	0	C1203	77.78	A6802	0.0077
High	SMGPVRVAF	11	1	1	P29279		0	4.66628e+06	0.002	0.005703	3.0315	2	963.509	0.562793	67.7144	0	C1203	40.74	B1503	0.0604
High	EAAGImENI	31	1	1	O60341	M6(Oxidation)	0	3.59437e+06	0.002	0.00603	3.02726	2	963.445	-0.505014	55.6854	0	C1203	74.07	A6802	0.0187
High	GKAFSQSSY	8	3	3	Q9UNY5;Q8NF99;Q9NQZ8		0	5.27607e+06	0.002	0.004854	3.00449	2	974.458	-0.313205	37.4289	0	C1203	40.74	B1503	0.1022
High	VQKPDAANY	6	1	1	Q9NQW6		0	1.67454e+06	0.002	0.005803	2.98453	2	1005.5	-0.459456	35.537	0	C1203	48.15	B1503	0.0102
High	VAHSPPSTL	11	1	1	Q03252		0	4.68776e+06	0.002	0.006953	2.97069	2	908.483	-0.550852	40.324	0	C1203	88.89	C1203	0.016
High	GKLPSSSSL	1	1	1	Q9C091		0	1.1206e+06	0.002	0.005168	2.97036	2	875.483	-0.334113	43.57	0	C1203	44.44	B1503	0.4439
High	DLSNIINKL	2	1	1	Q9GZL7		0	800983	0.002	0.006921	2.95717	2	1029.59	-0.604105	85.3193	0	C1203	44.44	A6802	0.4715
High	RQIGSRSY	20	1	1	P51114		0	1.39702e+07	0.002	0.005523	2.95368	2	966.511	-0.440039	24.6409	0	C1203	30	B1503	0.0166
High	EIVQFFQGL	6	1	1	P31942		0	542848	0.002	0.006018	2.95105	2	1080.57	-0.824099	101.237	0	C1203	37.04	A6802	0.2097
High	YGYEHILTL	21	1	1	Q96AX1		0	3.74835e+06	0.002	0.005242	2.92936	2	1108.57	-0.369098	77.3419	0	C1203	59.26	C1203	0.0034
High	GKVPVVVSY	1	1	1	Q9Y4C4		0	2.36396e+06	0.002	0.005354	2.91217	2	947.556	-0.518924	58.2001	0	C1203	51.85	B1503	0.0084
High	AAATRTTSF	8	1	1	Q9H3F6		0	1.22765e+06	0.002	0.006597	2.91127	2	925.474	-0.207379	33.5308	0	C1203	74.07	C1203	0.0347
High	EVFQKVTEV	5	1	1	Q8IVJ1		0	1.32152e+06	0.002	0.005248	2.88398	2	1078.58	-0.700241	56.9085	0	C1203	48.15	A6802	0.0097
High	VKEGVSAAF	4	1	1	Q7L1Q6		0	2.59421e+06	0.002	0.004972	2.86403	2	907.488	-0.0235993	48.6777	0	C1203	37.04	B1503	0.08
High	KSGPTSYL	19	1	1	Q5T686		0	4.33294e+06	0.002	0.00597	2.85816	2	852.446	-0.318947	47.2145	0	C1203	70	C1203	6.0005
High	GKAFGDSSY	5	1	1	Q9H5H4		0	1.66173e+06	0.002	0.00582	2.83858	2	931.416	0.343406	38.6331	0	C1203	40.74	B1503	0.1004
High	SVVELVNKL	6	1	1	Q9BQE5		0	2.72356e+06	0.002	0.006809	2.82811	2	1000.6	-0.634939	73.2386	0	C1203	44.44	A6802	0.0721
High	EIIDFFLGA	5	1	1	P15880		0	4.4104e+06	0.002	0.005752	2.82015	2	1024.53	-0.427319	107.957	0	C1203	7.41	A6802	0.047
High	GKLVQIEY	21	1	1	P25787		0	1.50869e+07	0.002	0.006403	2.81939	2	949.535	0.0480806	59.8153	0	C1203	36.67	B1503	1.737
High	LQQPRSLTY	11	1	1	P22102		0	4.21946e+06	0.002	0.005792	2.81528	2	1105.6	-1.13859	51.1722	0	C1203	51.85	B1503	0.0046
High	FTSQVIRNL	1	1	1	Q14204		0	1.88089e+06	0.002	0.005601	2.79811	2	1077.6	-1.02987	63.3759	0	C1203	81.48	C1203	0.1727
High	KAYHEQLTV	5	1	1	Q9BQE3		0	0	0.002	0.005733	2.79346	2	1088.57	-1.43701	39.8979	0	C1203	85.19	C1203	0.0888
High	AKYPIKQSL	21	1	1	P21283		0	5.48982e+06	0.002	0.006588	2.77417	2	1047.62	-0.644458	42.3728	0	C1203	51.85	B1503	0.0819
High	HVGDIIKEV	20	2	2	Q14168;Q9NZW5		0	8.77163e+06	0.002	0.00496	2.77322	2	1009.57	-0.590416	54.2999	0	C1203	51.85	A6802	0.0853
High	SKAPAPVTY	5	1	1	Q9H0R1		0	1.54586e+06	0.002	0.006469	2.76238	2	933.504	-0.0936806	41.6263	0	C1203	59.26	B1503	0.0034
High	DTFDKNYKA	14	1	1	Q9BZG1		0	1.12546e+07	0.002	0.004634	2.75129	2	1101.52	-0.762609	35.0239	0	C1203	37.04	A6802	0.0393
High	GKVRTDITY	33	1	1	P62701		0	4.09262e+07	0.002	0.005692	2.73459	2	1052.57	-1.26371	39.2925	0	C1203	44.44	B1503	0.128
High	ETTSISKITV	13	1	1	P51587		0	4.77807e+06	0.002	0.00589	2.7251	2	1078.6	-0.701929	56.0079	0	C1203	40	A6802	0.1046
High	AAYYHPSYL	19	1	1	Q14687		0	9.12949e+06	0.002	0.005014	2.71026	2	1084.51	-0.120005	59.8722	0	C1203	85.19	C1203	0.0061
High	QGFPNRVVF	41	1	1	P35579		0	5.48251e+07	0.002	0.005952	2.7091	2	1063.57	-1.13301	68.898	0	C1203	48.15	C1203	0.1618
High	AHLNPAVTF	13	1	1	Q92482		0	4.00441e+06	0.002	0.006534	2.7027	2	969.514	-1.42207	61.0218	0	C1203	40.74	B1503	0.1165
High	ALmPPFTAF	11	1	1	P51955	M3(Oxidation)	0	1.63115e+06	0.002	0.00685	2.70234	2	1010.5	-0.53548	92.6411	0	C1203	40.74	B1503	0.0066
High	FSAGEPRVL	7	1	1	Q9BRA0		0	2.82562e+06	0.002	0.006741	2.69126	2	975.525	-0.80909	56.7607	0	C1203	88.89	C1203	0.1714
High	YKVDLESKL	2	1	1	Q96NC0		0	1.38777e+06	0.002	0.004588	2.68665	2	1094.61	-0.949568	56.2249	0	C1203	44.44	B1503	1.0015
High	NASEIVKTV	3	1	1	Q9Y3R5		0	787224	0.002	0.00577	2.6822	2	960.536	-0.150988	46.9841	0	C1203	92.59	A6802	0.0814
High	FTAAIISRV	17	1	1	Q9Y570		0	5.63238e+06	0.002	0.004838	2.68094	2	977.578	-0.399035	67.5037	0	C1203	77.78	A6802	0.0048
High	NSYPHQLYT	9	1	1	Q8IZD2		0	2.33155e+06	0.002	0.006535	2.67665	2	1122.52	0.0718683	47.7419	0	C1203	44.44	A6802	1.1212
High	AQYENPPHIY	3	2	2	Q12965;O00160		0	1.57645e+06	0.002	0.005895	2.66655	2	1231.57	-0.566246	54.8857	0	C1203	40	B1503	0.0053
High	DVSIINITV	5	1	1	Q96BP3		0	537472	0.002	0.005064	2.66655	2	973.556	-0.100921	96.38	0	C1203	48.15	A6802	0.0262
High	GKYASIILF	14	1	1	Q8TCB0		0	3.26182e+06	0.002	0.006313	2.66594	2	1011.59	-0.535504	83.3864	0	C1203	40.74	B1503	0.034
High	ETASILRSA	1	1	1	P43246		0	757717	0.002	0.005737	2.66572	2	947.515	-0.588927	46.8295	0	C1203	40.74	A6802	0.0382
High	FASHVSPEV	23	1	1	Q9NP61		0	53261416	0.002	0.004939	2.66356	2	972.479	0.127503	48.536	0	C1203	85.19	A6802	0.0842
High	EIAGPGFINV	10	1	1	P54136		0	2.09991e+06	0.002	0.006163	2.65887	2	1016.54	-0.236239	84.7194	0	C1203	31.43	A6802	0.0346
High	ETANFYQKA	4	1	1	Q5VW32		0	2.61229e+06	0.002	0.005468	2.65465	2	1071.51	-0.830741	41.9922	0	C1203	33.33	A6802	0.0814
High	EIFQKPFQTL	16	1	1	Q6DD88		0	3.54e+06	0.002	0.005488	2.63816	2	1250.68	-0.370573	75.5337	0	C1203	40	A6802	0.91
High	IKTVYPASY	4	1	1	Q9H211		0	1.58718e+06	0.002	0.0047	2.62188	2	1041.56	-0.557447	53.5343	0	C1203	40.74	B1503	0.0639
High	DTFSVQVLV	27	1	1	Q96L33		0	7.37535e+06	0.002	0.006866	2.61615	2	1007.54	-0.98138	94.0702	0	C1203	77.78	A6802	0.0147
High	AAFEKALEV	15	1	1	Q13325		0	5.31535e+06	0.002	0.005787	2.60831	2	977.53	-0.708608	62.5368	0	C1203	92.59	C1203	0.0125
High	TQTLVREY	9	1	1	P26641		0	1.84856e+06	0.002	0.006494	2.6066	2	1009.53	-0.497243	46.6483	0	C1203	40	B1503	0.9224
High	GKADGQQSSF	5	1	1	Q12772		0	819036	0.002	0.005241	2.60149	2	1024.47	-0.40954	25.0711	0	C1203	42.86	B1503	0.4021
High	GKVKSGGTY	5	1	1	P55017		0	7.47851e+06	0.002	0.004805	2.56694	2	896.483	-0.558225	17.7514	0	C1203	40.74	B1503	0.1015
High	ETFSSYISV	15	1	1	A5PLN9		0	1.60499e+07	0.002	0.006634	2.56519	2	1032.49	-0.463601	80.6513	0	C1203	77.78	A6802	0.0049
High	AVTKIIAKV	14	1	1	P49419		0	3.09103e+06	0.002	0.00488	2.56226	2	942.634	-0.442794	45.788	0	C1203	44.44	A6802	0.1748
High	TTSNTVSKL	7	1	1	Q6NZI2		0	3.05644e+06	0.002	0.006372	2.54973	2	950.515	-0.411486	34.1971	0	C1203	74.07	A6802	0.2818
High	STLFLPHYA	5	1	1	Q5T447		0	1.18931e+06	0.002	0.005273	2.54913	2	1048.54	-1.31983	72.0831	0	C1203	33.33	A6802	0.5246
High	NQKPPSAEY	11	1	1	Q9UPN3		0	4.31388e+06	0.002	0.005921	2.54208	2	1033.49	-0.128423	34.3858	0	C1203	48.15	B1503	0.0102
High	THLKPGTLY	26	1	1	Q53EP0		0	9.04904e+06	0.002	0.0058	2.52454	2	1029.57	-0.928889	43.484	0	C1203	37.04	B1503	0.1918
High	QKFLQGLVY	9	1	1	Q5J8M3		0	6.51034e+06	0.002	0.00543	2.51614	2	1095.62	-0.504807	74.9138	0	C1203	48.15	B1503	0.0525
High	NTTDIFQTV	41	1	1	P37802		0	7.30555e+08	0.002	0.00516	2.49203	2	1038.51	-0.892007	77.1326	0	C1203	74.07	A6802	0.0045
High	AAFPYGGVL	9	1	1	Q6PCD5		0	1.85947e+06	0.002	0.004849	2.46723	2	894.472	0.0124789	86.2762	0	C1203	92.59	C1203	0.0098
High	NTIPLFVQL	9	2	2	P35222;P14923		0	1.94443e+07	0.002	0.006575	2.46576	2	1044.61	-0.154243	102.701	0	C1203	77.78	A6802	0.0126
High	ETFNDFVRL	16	1	1	O43913		0	4.8749e+06	0.002	0.006855	2.45436	2	1140.57	-1.21615	80.5921	0	C1203	74.07	A6802	0.019
High	KKIDASQTEF	1	1	1	O94979		0	1.80316e+06	0.002	0.006933	2.45319	2	1166.61	0.035066	37.789	0	C1203	34.29	B1503	0.0351
High	RQYPEVIKY	2	1	1	Q9UIF8		0	3.54227e+06	0.002	0.006358	2.43411	2	1195.65	-0.605084	50.6848	0	C1203	55.56	B1503	0.0008
High	RSYPYAFSV	10	1	1	Q5H9F3		0	5.8019e+06	0.002	0.005902	2.43193	2	1089.54	-0.641714	67.2881	0	C1203	77.78	C1203	0.032
High	QQFRNAPPF	23	1	1	O60830		0	1.22061e+07	0.002	0.006729	2.39611	2	1104.56	-0.802596	56.088	0	C1203	33.33	B1503	0.035
High	EVAPSFGTL	20	1	1	Q5SRE5		0	2.06548e+07	0.002	0.006647	2.38852	2	920.472	-0.422433	77.2049	0	C1203	51.85	A6802	0.0246
High	AAAPQLLIV	34	1	1	Q10589		0	4.08019e+07	0.002	0.005587	2.38633	2	895.56	-0.859721	88.2009	0	C1203	92.59	C1203	0.2252
High	HNAGISFSV	20	1	1	P40692		0	1.8612e+07	0.002	0.005231	2.36596	2	931.463	-0.456429	62.0533	0	C1203	44.44	A6802	0.2808
High	FQAPRNPTL	14	1	1	Q8IZW8		0	6.36341e+06	0.002	0.004857	2.3563	2	1043.56	-0.605264	55.0663	0	C1203	55.56	B1503	0.0561
High	HQKLGIAY	9	1	1	Q9HB58		0	2.71244e+06	0.002	0.005836	2.3478	2	929.52	0.0225985	44.0784	0	C1203	36.67	B1503	0.1127
High	EAYDQRQDTV	7	1	1	Q99426		0	2.06293e+06	0.002	0.00581	2.32948	2	1224.55	-0.432581	36.4185	0	C1203	60	A6802	0.51
High	AIAPIIAAV	14	1	1	Q9BQ52		0	5.85518e+06	0.002	0.006491	2.31633	2	838.54	0.144562	87.1791	0	C1203	55.56	A6802	0.022
High	GQAHPSASY	6	1	1	Q15652		0	913498	0.002	0.006771	2.31524	2	917.411	-0.211458	25.8239	0	C1203	40.74	B1503	0.0068
High	ELFTGFIKV	4	1	1	Q86TM6		0	1.92621e+06	0.002	0.006305	2.31485	2	1053.6	-0.476075	88.383	0	C1203	44.44	A6802	0.114
High	RTAPSGSEY	2	1	1	O43660		0	564503	0.002	0.005015	2.26868	2	967.448	-0.059667	28.3585	0	C1203	81.48	C1203	0.0863
High	FIASVNTLV	5	1	1	P53367		0	718193	0.002	0.00482	2.23344	2	963.551	0.0110572	87.1881	0	C1203	48.15	A6802	0.0202
High	EVSPSTLFAV	3	1	1	Q9NPH2		0	685578	0.002	0.006221	2.21219	2	1049.55	-0.545425	90.427	0	C1203	28.57	A6802	0.0723
High	ETFFGVQWV	6	1	1	P32970		0	1.1129e+06	0.002	0.005729	2.21182	2	1112.54	-0.206866	104.847	0	C1203	74.07	A6802	0.0235
High	TAYPQVVVV	32	1	1	Q9ULI2		0	4.8437e+07	0.002	0.00677	2.19956	2	975.551	-0.041393	76.9214	0	C1203	96.3	C1203	0.008
High	AQVVQWVSF	8	1	1	P26641		0	747816	0.002	0.004627	2.17406	2	1063.56	-0.435403	92.2058	0	C1203	37.04	B1503	0.0652
High	ETADVKASV	11	1	1	Q8N1F7		0	9.54105e+06	0.002	0.005377	2.14596	2	919.473	-0.353878	36.1319	0	C1203	74.07	A6802	0.0022
High	mAAAWPLLL	41	1	1	P15151	M1(Oxidation)	0	5.57956e+06	0.002	0.005896	2.10797	2	1001.55	-0.710862	106.091	0	C1203	85.19	C1203	0.0433
High	YASDVQLIL	13	1	1	Q8NHQ8		0	1.39244e+07	0.002	0.0059	2.09208	2	1021.56	-0.863104	88.2323	0	C1203	88.89	C1203	0.0293
High	YSFYLPIAA	7	1	1	P14324		0	3.53062e+06	0.002	0.00642	2.08901	2	1044.54	-0.579193	100.138	0	C1203	44.44	C1203	0.3945
High	ESSPFVERL	18	1	1	P14625		0	1.75806e+07	0.002	0.004684	2.07162	2	1063.54	-1.01756	63.3588	0	C1203	81.48	A6802	0.1754
High	ELFPIQmEGV	14	1	1	O96008	M7(Oxidation)	0	1.20601e+06	0.002	0.005059	2.06396	2	1178.58	-0.238395	89.6715	0	C1203	34.29	A6802	0.3394
High	QASPFVLRA	10	1	1	Q9BUE0		0	7.16625e+06	0.002	0.006705	2.04174	2	988.557	-0.565406	62.7304	0	C1203	55.56	A6802	0.7658
High	DVSSILTSI	6	2	2	P49459;P63146		0	580668	0.002	0.006832	2.0239	2	934.509	-0.444805	96.9234	0	C1203	37.04	A6802	0.0302
High	GKLQKTVSY	5	1	1	P12757		0	1.44816e+06	0.003	0.007231	3.31838	2	1023.58	-0.408329	33.7252	0	C1203	40.74	B1503	0.0306
High	AAAGLHSNV	9	1	1	Q9UJX3		0	3.18479e+06	0.003	0.007254	3.12214	2	839.437	0.106086	32.8082	0	C1203	85.19	A6802	0.3613
High	EVINTVAQV	19	1	1	O15121		0	1.89107e+07	0.003	0.009186	3.05653	2	972.535	-1.02775	63.9646	0	C1203	40.74	A6802	0.0059
High	GKRLDVTGF	2	1	1	Q9UIY3		0	2.14885e+06	0.003	0.01152	3.0304	2	992.552	-0.364463	49.0127	0	C1203	33.33	B1503	0.1662
High	TASPLVKSV	22	1	1	Q6P4F7		0	8.85639e+06	0.003	0.008804	3.02097	2	901.535	-0.502063	46.6618	0	C1203	92.59	A6802	0.2616
High	MATPLLmQA	14	1	1	P04233	M7(Oxidation)	0	3.17605e+06	0.003	0.01129	3.02012	2	991.495	-0.617114	73.087	0	C1203	44.44	A6802	0.5602
High	NIANHFFTV	19	1	1	Q16222		0	5.72508e+06	0.003	0.00843	2.98924	2	1062.54	-0.298106	74.2729	0	C1203	44.44	A6802	0.0348
High	KATAYILSV	14	1	1	P01106		0	5.28288e+06	0.003	0.008545	2.98413	2	965.566	-0.952678	66.084	0	C1203	81.48	C1203	0.2256
High	KASPLTFTV	23	1	1	P09884		0	1.31675e+07	0.003	0.007745	2.98117	2	963.551	0.137745	68.0109	0	C1203	88.89	C1203	0.1183
High	FANYIDKV	6	1	1	P08670		0	3.14536e+06	0.003	0.01131	2.95655	2	969.504	-0.342022	59.8615	0	C1203	83.33	A6802	5.2482
High	GKTFSQTSY	6	1	1	Q96IR2		0	1.33084e+06	0.003	0.01001	2.95541	2	1018.48	-0.564824	39.3474	0	C1203	37.04	B1503	0.2193
High	SSSGIVYKV	17	1	1	Q9P2E3		0	7.70174e+06	0.003	0.007438	2.9541	2	939.512	-2.43279	49.8789	0	C1203	77.78	A6802	0.0342
High	EVAQAGKAV	12	1	1	Q9UPN9		0	6.79778e+06	0.003	0.01034	2.93854	2	872.484	-0.106814	28.9803	0	C1203	44.44	A6802	0.1409
High	KASEWVQQV	8	1	1	P49588		0	3.92903e+06	0.003	0.01024	2.92886	2	1074.56	-1.6783	52.1648	0	C1203	85.19	C1203	0.2269
High	LQRATGISF	3	1	1	Q15393		0	1.89928e+06	0.003	0.008546	2.91563	2	992.553	0.506516	57.1525	0	C1203	33.33	B1503	0.004
High	AATEIVERV	9	1	1	Q9UID3		0	5.79414e+06	0.003	0.007238	2.9013	2	987.546	-1.24386	50.4992	0	C1203	85.19	A6802	0.27
High	GKAFSQSAY	1	3	3	Q6ZN57;O14709;Q9NQZ8		0	1.09778e+06	0.003	0.009801	2.89186	2	958.463	-0.216197	38.2844	0	C1203	40.74	B1503	0.1011
High	SKLGPGEKY	18	2	2	P53805;Q9UKA8		0	7.05451e+06	0.003	0.01231	2.88463	2	978.525	-0.386553	31.1608	0	C1203	40.74	B1503	0.1059
High	SQRSPSELF	5	1	1	Q9Y2W1		0	1.51902e+06	0.003	0.007568	2.86409	2	1050.52	-0.542281	54.9714	0	C1203	33.33	B1503	0.0059
High	LQKPGETVF	3	1	1	Q6NYC1		0	1.5097e+06	0.003	0.008216	2.85198	2	1018.56	-0.490191	53.8973	0	C1203	40.74	B1503	0.0034
High	HQITVLHVY	3	1	1	Q9NYP7		0	1.78799e+06	0.003	0.01005	2.84541	2	1109.61	-0.49978	56.3648	0	C1203	40.74	B1503	0.0082
High	VmAPRTLVL	97	9	9	P01892;P30447;P05534;P18462;P30450;P30456;P30457;P01891;P10316	M2(Oxidation)	0	8.25366e+07	0.003	0.01158	2.83782	2	1015.6	1.18629	65.5	0	C1203	59.26	C1203	0.129
High	SVADTVARV	13	1	1	Q9NYY3		0	4.79284e+06	0.003	0.01039	2.81809	2	917.505	-0.0750061	49.2603	0	C1203	48.15	A6802	0.0055
High	KAISGVHTV	15	2	2	Q2VIR3;P41091		0	1.43935e+07	0.003	0.00715	2.81647	2	911.531	-0.334699	30.5163	0	C1203	85.19	C1203	0.0197
High	STAAVFHAV	10	1	1	P57723		0	3.21693e+06	0.003	0.007323	2.81324	2	902.473	-0.282979	53.5233	0	C1203	70.37	A6802	0.0033
High	AKFGSKEEY	6	1	1	Q5VWQ8		0	1.49139e+06	0.003	0.01117	2.80713	2	1058.51	-0.494271	30.6417	0	C1203	51.85	B1503	0.0236
High	DVSNVIEKV	5	1	1	O94955		0	110128126	0.003	0.008665	2.80324	2	1002.55	-0.764353	61.7249	0	C1203	44.44	A6802	0.0314
High	KLLGPGVNY	1	1	1	P40763		0	1.23625e+06	0.003	0.009383	2.787	2	960.551	-0.332461	57.9619	0	C1203	44.44	B1503	0.0785
High	AKAPPTACY	2	1	1	P17676		0	2.17931e+06	0.003	0.007415	2.78105	2	921.45	-0.0929349	38.0441	0	C1203	51.85	B1503	0.027
High	EVIRDVINV	19	1	1	Q6IEG0		0	1.4144e+07	0.003	0.008486	2.77786	2	1056.6	-1.20961	67.8742	0	C1203	44.44	A6802	0.0084
High	RKNPVTSTY	14	1	1	Q13131		0	1.08589e+07	0.003	0.00843	2.774	2	1065.57	-0.6762	30.4151	0	C1203	48.15	B1503	0.0024
High	STAAVIQNV	8	1	1	Q6P4R8		0	2.91234e+06	0.003	0.008425	2.75396	2	902.494	-0.566605	57.3257	0	C1203	74.07	A6802	0.0054
High	FASTILHLV	19	1	1	P61803		0	3.66016e+06	0.003	0.01239	2.75081	2	1000.58	-0.49113	82.2538	0	C1203	81.48	A6802	0.045
High	AAAATVREL	2	1	1	Q9UP83		0	586005	0.003	0.008767	2.74355	2	901.51	-0.238456	42.9348	0	C1203	92.59	C1203	0.0807
High	AKLPTTAF	9	1	1	Q7Z333		0	2.28545e+06	0.003	0.01045	2.73635	2	848.488	0.0556251	56.5571	0	C1203	30	B1503	0.3803
High	SQARTLITF	2	1	1	Q8N1F7		0	2.29523e+06	0.003	0.007376	2.73592	2	1036.58	-0.776509	66.9606	0	C1203	40.74	B1503	0.0095
High	PQRATSNVF	12	3	3	P19105;O14950;P24844		0	6.64113e+06	0.003	0.009629	2.732	2	1019.53	-1.2054	40.2562	0	C1203	33.33	B1503	0.2068
High	ELSNVLAAM	4	1	1	Q9Y3U8		0	1.18396e+06	0.003	0.01236	2.69995	2	947.487	-0.150367	84.7515	0	C1203	33.33	A6802	0.4543
High	IKVIPTVF	16	1	1	P14902		0	1.44916e+07	0.003	0.01163	2.69636	2	916.586	-0.271611	78.6487	0	C1203	33.33	B1503	0.797
High	SVAVIHQSL	1	1	1	Q9BV87		0	1.76338e+06	0.003	0.01186	2.67489	2	953.541	-0.576951	52.9206	0	C1203	40.74	C1203	0.18
High	ETAGFQEGV	13	1	1	Q5TCZ1		0	3.71654e+06	0.003	0.008513	2.65913	2	937.426	-0.397313	53.8913	0	C1203	74.07	A6802	0.0046
High	VAINHIVDF	16	1	1	P78346		0	5.55404e+06	0.003	0.01169	2.65882	2	1027.56	-0.688251	74.4158	0	C1203	77.78	C1203	0.1101
High	DTSSLFDKL	8	1	1	Q16665		0	1.11669e+06	0.003	0.01025	2.65592	2	1025.51	-0.66452	76.3645	0	C1203	74.07	A6802	0.3375
High	EASFVLHTI	1	1	1	Q15418		0	1.26803e+06	0.003	0.01007	2.65119	2	1016.54	-0.336648	71.1936	0	C1203	74.07	A6802	0.0607
High	GAYEQVIKY	13	1	1	P98194		0	1.18778e+07	0.003	0.01147	2.64673	2	1070.55	-0.596245	57.924	0	C1203	88.89	C1203	0.0474
High	AAADVLEFV	13	1	1	P53618		0	1.78063e+06	0.003	0.008941	2.64338	2	934.488	-0.192295	92.3699	0	C1203	85.19	A6802	0.0618
High	FVGYFPATV	7	1	1	Q9HCE1		0	3.33097e+06	0.003	0.009521	2.64042	2	1000.51	-0.344755	88.2094	0	C1203	48.15	A6802	0.1668
High	SQQPASGVAY	2	1	1	Q96KR1		0	0	0.003	0.007399	2.62325	2	1007.48	-0.591582	45.2404	0	C1203	34.29	B1503	0.0157
High	AKVKATTSL	6	1	1	A9YTQ3		0	1.37888e+06	0.003	0.01029	2.61704	2	918.562	-0.226652	29.922	0	C1203	40.74	B1503	0.1105
High	RQFTSSSSI	10	1	1	Q04695		0	1.73236e+06	0.003	0.008173	2.61608	2	1012.51	-0.528074	40.5103	0	C1203	33.33	B1503	0.0889
High	YAVNILENI	1	1	1	Q2KHR3		0	308314	0.003	0.01015	2.61498	2	1048.57	-0.525708	93.184	0	C1203	70.37	A6802	0.1608
High	SQLVAGVAF	6	1	1	Q99832		0	2.22074e+06	0.003	0.01059	2.60749	2	891.493	-0.245211	80.8303	0	C1203	33.33	B1503	0.0138
High	ETFQNSVFV	15	1	1	O00767		0	1.60268e+07	0.003	0.0101	2.59686	2	1070.51	-1.515	76.9627	0	C1203	74.07	A6802	0.0072
High	SKTQVTVQY	9	2	2	Q00266;P31153		0	1.53716e+06	0.003	0.0113	2.58851	2	1053.56	-1.25419	43.0422	0	C1203	40.74	B1503	0.0568
High	RQYPTPFQL	9	1	1	Q8ND82		0	2.37399e+06	0.003	0.008932	2.58588	2	1149.6	-1.27523	72.953	0	C1203	51.85	B1503	0.0118
High	DIATILSKV	6	1	1	Q8NG31		0	1.50367e+06	0.003	0.0104	2.57748	2	959.577	-0.280753	86.2609	0	C1203	40.74	A6802	0.0368
High	NTAETITRV	14	1	1	O96006		0	5.0962e+06	0.003	0.01017	2.57271	2	1004.54	-0.227435	43.5323	0	C1203	77.78	A6802	0.0041
High	GKTAVDTVF	5	2	2	Q9P2N7;Q9P2J3		0	1.30053e+06	0.003	0.01126	2.57014	2	937.498	-0.935283	55.3813	0	C1203	33.33	B1503	0.1615
High	AKQPHVGDY	1	1	1	Q06323		0	484320	0.003	0.01232	2.56623	2	1014.5	-0.299361	31.9429	0	C1203	51.85	B1503	0.152
High	AQSSLQEVY	4	1	1	P28066		0	3.77832e+06	0.003	0.008509	2.56249	2	1024.49	-0.631743	56.3299	0	C1203	51.85	B1503	0.0143
High	DAANVmVYV	7	1	1	Q9Y4C1	M6(Oxidation)	0	3.36732e+06	0.003	0.009749	2.56154	2	997.466	0.156148	69.2561	0	C1203	81.48	A6802	0.0105
High	KGFPHVIYA	12	1	1	Q13485		0	7.8442e+06	0.003	0.007333	2.55621	2	1031.57	-0.949548	56.3168	0	C1203	18.52	C1203	0.7882
High	AAYQSVRIL	15	1	1	Q9HAT2		0	7.21732e+06	0.003	0.007638	2.5473	2	1020.58	-1.75935	61.9409	0	C1203	88.89	C1203	0.0263
High	IKDNVVIVY	2	1	1	Q9Y2T2		0	5.22779e+06	0.003	0.009951	2.53971	2	1062.62	-1.12895	64.3345	0	C1203	48.15	B1503	0.0687
High	SAVSVAERV	1	1	1	Q08211		0	561063	0.003	0.009948	2.53617	2	917.505	-0.00848309	45.6791	0	C1203	77.78	A6802	0.1903
High	GQNKKVMIY	1	2	2	Q14839;Q8TDI0		0	2.07598e+06	0.003	0.009188	2.53213	2	1080.59	-0.101462	38.0695	0	C1203	40.74	B1503	0.0144
High	GQFSKPFSF	3	1	1	P35658		0	1.21546e+06	0.003	0.01064	2.53208	2	1044.51	-0.478121	70.7609	0	C1203	40.74	B1503	0.0042
High	GQLPGLHEY	5	1	1	Q8TAT6		0	8.79415e+06	0.003	0.009679	2.53182	2	1013.5	-0.891275	57.0532	0	C1203	48.15	B1503	0.0052
High	DVIGQTITI	6	1	1	Q6UN15		0	716124	0.003	0.01087	2.52306	2	959.54	-0.585211	83.7626	0	C1203	40.74	A6802	0.0372
High	FTAGIVEAVL	5	1	1	Q8IUR0		0	3.75224e+06	0.003	0.00743	2.51526	2	1019.58	-0.573356	95.1483	0	C1203	60	A6802	0.2378
High	FSTTVIQNV	7	1	1	Q9Y5K8		0	5.47498e+06	0.003	0.007964	2.50612	2	1008.54	-0.678554	71.6399	0	C1203	74.07	A6802	0.1988
High	EVSNTFVRL	18	1	1	Q9BUI4		0	1.31656e+07	0.003	0.01162	2.49818	2	1064.57	-0.914861	65.7379	0	C1203	44.44	A6802	0.0389
High	GKSSLIVSY	16	1	1	Q96L33		0	5.64322e+06	0.003	0.01132	2.48925	2	953.529	-0.887011	56.3237	0	C1203	51.85	B1503	0.0338
High	SAFPEVRSL	16	1	1	Q6YHU6		0	4.98892e+06	0.003	0.01167	2.47937	2	1005.54	0.974419	65.5788	0	C1203	92.59	C1203	0.0047
High	NAFASVILF	13	1	1	P26641		0	4.3783e+06	0.003	0.007863	2.47795	2	981.54	-0.361308	104.145	0	C1203	77.78	C1203	0.1134
High	EVSNIVKEA	10	1	1	P63172		0	4.6549e+06	0.003	0.008701	2.47725	2	988.531	0.17625	44.5415	0	C1203	14.81	A6802	0.2185
High	LQKANQEQY	2	1	1	Q9UBU8		0	634455	0.003	0.008531	2.47308	2	1121.56	-0.173056	29.9288	0	C1203	37.04	B1503	0.0391
High	ETFPANIQVV	15	1	1	Q5VYK3		0	5.33045e+06	0.003	0.01113	2.46563	2	1117.59	-0.270873	82.7311	0	C1203	60	A6802	0.0208
High	TTFPRPVTV	50	1	1	Q15233		0	3.19683e+08	0.003	0.008628	2.45407	2	1017.57	-2.15912	61.3382	0	C1203	88.89	A6802	0.0056
High	EVYGSVAKV	22	1	1	Q07864		0	2.65818e+07	0.003	0.00732	2.45147	2	951.514	-0.744835	47.5016	0	C1203	48.15	A6802	0.0054
High	SQVPTQmSF	7	1	1	Q8TEL6	M7(Oxidation)	0	2.13857e+06	0.003	0.008079	2.44772	2	1040.47	-0.154818	53.6317	0	C1203	37.04	B1503	0.0021
High	ETSDILQRV	12	1	1	Q14164		0	5.78522e+06	0.003	0.008819	2.43843	2	1060.56	-0.421937	58.5287	0	C1203	74.07	A6802	0.0048
High	DAANVLLQL	9	1	1	Q7Z6Z7		0	1.06301e+06	0.003	0.009524	2.42801	2	956.541	-0.495836	95.5181	0	C1203	81.48	A6802	0.2502
High	mTADSRSQV	12	1	1	P60900	M1(Oxidation)	0	1.38374e+07	0.003	0.008387	2.42046	2	1010.46	-0.347953	23.8223	0	C1203	74.07	A6802	0.0169
High	ETIETINQL	4	1	1	Q96GM5		0	3.19647e+06	0.003	0.008188	2.4079	2	1060.55	-0.412954	71.0776	0	C1203	74.07	A6802	0.0071
High	QQALHTVQY	8	1	1	Q5SRE5		0	2.65223e+06	0.003	0.01133	2.40776	2	1087.55	-0.630349	45.6898	0	C1203	44.44	B1503	0.0075
High	EVVAGSHEL	8	1	1	Q01082		0	2.12438e+06	0.003	0.009057	2.39107	2	940.473	-0.372371	42.6516	0	C1203	40.74	A6802	0.0279
High	AAYPEIVAV	16	1	1	Q17RS7		0	4.9064e+06	0.003	0.01051	2.39086	2	932.508	-0.616606	79.1468	0	C1203	96.3	C1203	0.0061
High	FTFDQDPSVL	7	1	1	Q9UBN7		0	951185	0.003	0.008735	2.38907	2	1168.55	-0.278883	86.3683	0	C1203	77.14	A6802	0.4613
High	ELINIIDGV	11	1	1	Q8NI22		0	2.52844e+06	0.003	0.009659	2.38751	2	985.556	-0.0479088	95.2536	0	C1203	40.74	A6802	0.0378
High	EVSEIHIKV	1	1	1	P30414		0	1.15665e+06	0.003	0.007832	2.37624	2	1053.59	-0.590344	54.0225	0	C1203	48.15	A6802	0.0039
High	EGIDFYTSI	8	3	3	P34931;P08107;P11142		0	6.57335e+06	0.003	0.007086	2.3408	2	1044.49	-0.58472	89.1372	0	C1203	33.33	A6802	0.2987
High	EVYVGDERV	7	1	1	O14976		0	2.73754e+06	0.003	0.01038	2.32702	2	1065.52	-2.40166	49.9884	0	C1203	40.74	A6802	0.042
High	TTILIPYHI	6	1	1	Q6IQ26		0	1.32431e+06	0.003	0.01029	2.31898	2	1070.62	-0.269183	81.9498	0	C1203	62.96	A6802	0.0369
High	HQFLQNEY	20	1	1	Q16531		0	1.18937e+07	0.003	0.0115	2.31532	2	1078.49	-0.759332	52.0733	0	C1203	43.33	B1503	0.1513
High	KQQNPRLVY	11	1	1	O00764		0	2.49559e+06	0.003	0.008405	2.31102	2	1145.64	-0.617993	39.9915	0	C1203	44.44	B1503	0.0037
High	RAAPFSLEY	6	1	1	Q15181		0	5.14051e+06	0.003	0.009292	2.27948	2	1053.54	-0.450891	68.3425	0	C1203	92.59	C1203	0.008
High	TVARPSVPA	35	1	1	P08174		0	1.99711e+08	0.003	0.009399	2.27462	2	897.514	-1.20727	40.967	0	C1203	7.41	A6802	0.2629
High	EVFAWNNEV	3	1	1	P49419		0	7.37632e+06	0.003	0.008716	2.23621	2	1107.51	-0.270693	81.7396	0	C1203	44.44	A6802	0.0077
High	QKYAGKDGY	4	1	1	P31949		0	1.05375e+06	0.003	0.01212	2.23586	2	1029.5	-0.439031	24.5614	0	C1203	40.74	B1503	0.2254
High	ITAPIEAQV	5	1	1	P52756		0	3.38215e+06	0.003	0.009442	2.23102	2	941.53	-0.59543	68.1116	0	C1203	77.78	A6802	0.021
High	VMAPRTVLL	9	10	10	P01889;P30460;P30462;Q95365;P30475;P30480;P30486;Q29836;Q31612;Q31610		0	4.93244e+07	0.003	0.009957	2.2231	2	999.601	-1.50043	69.9471	0	C1203	55.56	C1203	0.1791
High	ETSPVLQKL	14	1	1	Q9NRR4		0	4.74849e+07	0.003	0.007363	2.21933	2	1014.58	-0.99892	57.5059	0	C1203	77.78	A6802	0.0343
High	FASEYPLIL	2	1	1	Q9UPR0		0	2.35395e+06	0.003	0.008262	2.20183	2	1052.57	-0.560415	97.4711	0	C1203	92.59	C1203	0.0334
High	RQQQSQTAY	4	2	2	Q99613;B5ME19		0	3.81106e+06	0.003	0.01228	2.19883	2	1109.53	-0.272769	22.2953	0	C1203	37.04	B1503	0.0031
High	FTWEGLYNV	16	1	1	P51784		0	5.44596e+06	0.003	0.01176	2.18845	2	1128.54	-0.876819	95.941	0	C1203	74.07	A6802	0.009
High	ETFEHPNVV	27	1	1	Q00534		0	4.99997e+07	0.003	0.007901	2.18777	2	1071.51	-1.29577	53.9234	0	C1203	81.48	A6802	0.0088
High	EVADFLIKA	5	2	2	Q8IWZ3;O75179		0	2.03189e+07	0.003	0.007265	2.17421	2	1005.56	-0.556486	74.3281	0	C1203	11.11	A6802	0.0079
High	ITAKVATHL	2	1	1	Q92752		0	5.67579e+06	0.003	0.01192	2.17256	2	953.578	-0.270579	54.0027	0	C1203	70.37	C1203	0.3112
High	FAGPHSTL	2	1	1	Q9Y5X2		0	1.33711e+06	0.003	0.007179	2.15789	2	829.42	0.176575	45.1129	0	C1203	90	C1203	1.0372
High	YASNITSVL	12	2	2	Q13085;O00763		0	6.95376e+06	0.003	0.01025	2.13326	2	967.509	-0.38187	75.6857	0	C1203	85.19	C1203	0.0072
High	RTYPVEILY	6	1	1	Q14562		0	4.40955e+06	0.003	0.01058	2.11663	2	1153.62	-0.670975	73.0411	0	C1203	81.48	C1203	0.0382
High	DVIYPmAVV	23	1	1	P78406	M6(Oxidation)	0	5.53641e+06	0.003	0.01243	2.11558	2	1022.52	-0.590671	84.3985	0	C1203	40.74	A6802	0.0294
High	TTVRVTNSNA	7	3	3	Q15155;Q5JPE7;P69849		0	1.12821e+06	0.003	0.007443	2.06565	2	1062.55	0.0275812	28.0688	0	C1203	20	A6802	1.6273
High	EASYLITSV	17	1	1	O60488		0	2.8797e+07	0.003	0.01036	2.06273	2	982.509	-0.475018	76.7244	0	C1203	81.48	A6802	0.0329
High	EIYSESHRV	7	1	1	Q96I51		0	4.60402e+06	0.003	0.01144	2.03583	2	1119.54	-0.478144	34.5012	0	C1203	44.44	A6802	0.0266
High	ETmNNIDRL	21	1	1	Q5T0N5	M3(Oxidation)	0	4.40599e+06	0.003	0.007926	2.03539	2	1121.53	-0.476393	46.9071	0	C1203	70.37	A6802	0.078
High	SKVQTAVTm	1	1	1	Q9HD42	M9(Oxidation)	0	785451	0.003	0.01133	2.01424	2	980.508	-0.426587	33.1373	0	C1203	37.04	B1503	0.1258
High	DVAPPLIVHNI	3	1	1	P23458		0	744034	0.003	0.007143	2.00797	2	1187.68	-0.470941	79.3266	0		0	A6802	0.5607
High	DTFSGQFVL	18	1	1	Q5T089		0	5.83107e+06	0.003	0.007634	1.9978	2	1013.49	0.0017247	91.7391	0	C1203	77.78	A6802	0.0629
High	TVFEHTFHV	2	1	1	P41250		0	4.14323e+06	0.003	0.01212	1.99372	2	1116.55	0.20747	59.7283	0	C1203	44.44	A6802	0.0026
High	FAADIISVL	1	1	1	Q13200		0	3.57842e+06	0.003	0.008541	1.96741	2	948.54	-0.347708	100.635	0	C1203	92.59	C1203	0.0035
High	SAVPFKILY	8	1	1	P10586		0	4.04069e+06	0.003	0.009759	1.9353	2	1037.6	-0.663818	80.2931	0	C1203	85.19	C1203	0.0483
High	YIFEEPFTI	4	1	1	P08237		0	286856	0.003	0.009086	1.90168	2	1158.57	-0.0763249	103.195	0	C1203	48.15	A6802	0.036
High	ETAPDSYKV	11	1	1	Q14244		0	2.25575e+07	0.003	0.009154	1.85725	2	1009.48	-0.857484	42.1263	0	C1203	77.78	A6802	0.0058
High	NKAEVHESY	2	1	1	Q15067		0	376603	0.003	0.01223	1.84654	2	1076.5	-0.0774265	25.8068	0	C1203	44.44	B1503	0.1677
High	HQmTPSSSY	13	1	1	Q93074	M3(Oxidation)	0	1.14295e+06	0.003	0.008553	1.7069	2	1053.43	-0.13174	28.2749	0	C1203	37.04	B1503	0.002
High	ETIFGEWTV	11	1	1	Q96MT1		0	1.76302e+07	0.003	0.008032	1.65117	2	1081.52	-0.370202	99.0641	0	C1203	70.37	A6802	0.0087
High	EVGPPLPPLL	8	1	1	Q9Y2F5		0	2.12106e+06	0.003	0.01123	1.64416	2	1031.61	-0.401819	100.096	0	C1203	42.86	A6802	0.7259
High	SKIRAPTTm	2	1	1	P08240	M9(Oxidation)	0	238102	0.003	0.007295	1.56906	2	1020.55	0.12988	30.059	0	C1203	37.04	B1503	0.0654
High	AKAPSLTF	6	1	1	Q9C0C6		0	1.35389e+06	0.004	0.01322	3.03992	2	834.472	0.0865184	58.9357	0	C1203	30	B1503	0.2613
High	KNAPALISEY	3	1	1	Q8IWB1		0	1.07421e+06	0.004	0.01479	2.91557	2	1105.59	-0.264768	58.1176	0	C1203	31.43	B1503	1.0986
High	RQYAKDIGF	11	1	1	P62273		0	3.59495e+06	0.004	0.01572	2.90171	2	1097.57	-0.965581	48.0744	0	C1203	37.04	B1503	0.0026
High	SQGVHISVY	3	1	1	O43395		0	1.09339e+06	0.004	0.01506	2.87567	2	989.504	-0.656056	55.294	0	C1203	44.44	B1503	0.0117
High	TTADPFVKV	3	1	1	Q8IV01		0	4.11225e+06	0.004	0.0168	2.84409	2	977.53	-0.698378	59.9092	0	C1203	77.78	A6802	0.0025
High	EVSNLYNNI	3	1	1	O94874		0	1.90788e+06	0.004	0.01397	2.80026	2	1065.52	-0.435297	67.0462	0	C1203	33.33	A6802	0.0536
High	NSSPVLSKV	7	1	1	Q9NXE8		0	2.36142e+06	0.004	0.01506	2.79817	2	930.525	-0.60327	46.0299	0	C1203	77.78	A6802	0.0394
High	KKIESSGVTY	1	1	1	Q9UKN8		0	1.69662e+06	0.004	0.01456	2.79448	2	1111.6	-0.428885	33.2822	0	C1203	31.43	B1503	0.0258
High	SVTQIYHAV	3	1	1	P04844		0	6.27276e+06	0.004	0.01329	2.79379	2	1017.54	-1.34694	54.1483	0	C1203	37.04	A6802	0.0354
High	DVINQTWTA	3	1	1	P62256		0	1.45797e+06	0.004	0.01528	2.79309	2	1047.51	-0.859321	70.9019	0	C1203	3.7	A6802	0.1186
High	SAADIPINI	12	1	1	P21333		0	4.87437e+06	0.004	0.01301	2.76647	2	913.499	-0.0912636	80.9612	0	C1203	81.48	A6802	0.0244
High	LATDILmGV	14	1	1	O43143	M7(Oxidation)	0	1.1609e+06	0.004	0.01616	2.70315	2	948.507	-0.492252	85.161	0	C1203	77.78	A6802	0.0768
High	KKLSSPSNY	5	1	1	Q13325		0	1.35132e+06	0.004	0.01351	2.70053	2	1023.55	-0.395597	27.5791	0	C1203	44.44	B1503	0.0581
High	AAKDPSPSV	7	1	1	O75153		0	1.49192e+06	0.004	0.01498	2.69075	2	871.452	-0.00960376	29.6014	0	C1203	81.48	C1203	0.2231
High	EISSILQEL	22	2	2	Q96L14;Q5SW79		0	9.05415e+06	0.004	0.01288	2.67785	2	1031.56	-1.79835	95.2716	0	C1203	48.15	A6802	0.0689
High	QQVPVNQVF	8	1	1	P39023		0	7.64897e+06	0.004	0.0147	2.61234	2	1058.56	-0.736766	69.8588	0	C1203	40.74	B1503	0.0054
High	EAIDFIDSI	11	1	1	P28562		0	3.10517e+06	0.004	0.01276	2.60816	2	1022.5	-0.342841	95.4014	0	C1203	74.07	A6802	0.0194
High	HAAELIKTV	1	1	1	Q8WUM4		0	1.98721e+06	0.004	0.01657	2.59241	2	981.572	-0.55942	44.0259	0	C1203	92.59	A6802	0.0764
High	EAINIIQGI	1	1	1	Q9NR81		0	5.0007e+06	0.004	0.01294	2.57268	2	970.556	-0.514434	87.0501	0	C1203	70.37	A6802	0.0326
High	LKTGISDVF	2	1	1	P19338		0	4.91381e+06	0.004	0.016	2.56284	2	979.545	-0.597844	66.8997	0	C1203	37.04	B1503	0.4357
High	ATSSVFQEV	11	1	1	Q9BTE0		0	4.41189e+06	0.004	0.0146	2.53733	2	967.473	-0.262897	67.1059	0	C1203	81.48	A6802	0.0874
High	TKQGWSSAY	1	2	2	Q7Z7E8;Q8WVN8		0	1.23275e+06	0.004	0.01642	2.53644	2	1027.48	-0.415561	43.0334	0	C1203	40.74	B1503	0.1445
High	GVVDIFQTV	24	2	2	P23468;Q13332		0	2.21114e+07	0.004	0.01567	2.53184	2	977.53	-0.386188	93.1659	0	C1203	44.44	A6802	0.0738
High	NSASIFNTL	20	1	1	Q96HU1		0	5.50664e+06	0.004	0.0158	2.46288	2	966.489	-0.377868	82.5517	0	C1203	77.78	A6802	0.0549
High	ETQNVVTKV	10	1	1	Q96MW1		0	5.97381e+06	0.004	0.0143	2.44572	2	1017.56	-1.07829	39.9296	0	C1203	70.37	A6802	0.0281
High	AAFDGHAREL	1	1	1	Q3MIP1		0	1.14788e+06	0.004	0.01704	2.41513	2	1086.53	-1.10403	42.5699	0	C1203	82.86	C1203	0.3533
High	EIKDQPQNV	5	1	1	O14879		0	2.04375e+06	0.004	0.01288	2.4133	2	1070.55	-0.0525706	35.2811	0	C1203	44.44	A6802	0.6185
High	SAAPLPLYT	14	1	1	P56524		0	3.72079e+06	0.004	0.01425	2.3664	2	932.509	0.114097	75.1638	0	C1203	55.56	A6802	1.4782
High	SKLDRNTSF	2	1	1	Q9UJF2		0	705004	0.004	0.01491	2.35011	2	1067.55	-0.704878	35.0446	0	C1203	33.33	B1503	0.0146
High	SQFPGAITL	12	1	1	Q8WZ82		0	2.37281e+06	0.004	0.01404	2.34499	2	933.504	-0.104393	84.2386	0	C1203	55.56	B1503	0.0055
High	AAFPGASLY	10	1	1	Q15038		0	2.97344e+06	0.004	0.01593	2.33256	2	896.451	-0.273224	77.4978	0	C1203	88.89	C1203	0.0078
High	GKVQENSAY	2	1	1	Q9Y3T9		0	925141	0.004	0.01671	2.32857	2	995.479	-0.537401	27.1637	0	C1203	37.04	B1503	0.0726
High	GALESVRLL	5	2	2	P22557;P13196		0	682571	0.004	0.01496	2.32186	2	957.572	-0.711363	70.0854	0	C1203	85.19	C1203	0.398
High	ETADTAHGV	1	1	1	Q5JSZ5		0	1.80362e+06	0.004	0.01329	2.30502	2	900.406	-0.0477759	26.3821	0	C1203	74.07	A6802	0.0034
High	FAVGVQQVL	6	1	1	O95373		0	790029	0.004	0.01539	2.28698	2	960.551	-0.342872	83.1702	0	C1203	85.19	C1203	0.0462
High	ETSTVITHV	9	1	1	Q8WXI7		0	4.89636e+06	0.004	0.01593	2.28586	2	986.515	-0.458339	46.7845	0	C1203	74.07	A6802	0.0047
High	AQDEHLITF	6	1	1	O75643		0	4.16064e+06	0.004	0.01318	2.21753	2	1073.53	-0.634364	67.1615	0	C1203	44.44	B1503	0.0106
High	LRNQLQSVY	4	1	1	Q9BSM1		0	7.44051e+06	0.004	0.01304	2.21496	2	1120.61	-0.283772	49.0927	0	C1203	40.74	B1503	0.1483
High	TVISILNTI	3	1	1	O60716		0	650125	0.004	0.01349	2.1994	2	973.593	-0.229428	98.3596	0	C1203	37.04	A6802	0.0184
High	PQYQTWEEF	6	1	1	P49458		0	2.18177e+06	0.004	0.01658	2.19145	2	1227.53	-0.337019	79.2914	0	C1203	37.04	B1503	0.9741
High	TTATVTTTQA	2	1	1	Q01844		0	1.24448e+06	0.004	0.01565	2.17924	2	994.505	-0.477654	36.5497	0	C1203	20	A6802	0.4631
High	EVTEFFVTL	2	1	1	Q5T4S7		0	545978	0.004	0.01692	2.17181	2	1084.56	-0.405363	102.001	0	C1203	48.15	A6802	0.0182
High	VAFPKSLVA	25	1	1	Q8IWI9		0	1.82752e+07	0.004	0.01554	2.13125	2	931.561	-0.171304	67.5302	0	C1203	59.26	C1203	0.1419
High	ETADVKASVL	2	1	1	Q8N1F7		0	5.33283e+06	0.004	0.01687	2.11851	2	1032.56	-1.10738	51.1098	0	C1203	57.14	A6802	0.0866
High	EAWGSGVEVLV	2	1	1	P03923		0	763817	0.004	0.01565	2.10924	2	1145.58	-0.100854	90.5608	0		0	A6802	1.428
High	NTNGSQFFL	2	1	2	Q9UNP9;Q96BP3		0	1.15041e+06	0.004	0.01386	2.10897	2	1027.48	-0.544099	79.2348	0	C1203	70.37	A6802	0.0925
High	ESFIKAIGV	6	1	1	Q9NRN7		0	2.4311e+06	0.004	0.01419	2.10354	2	963.551	-0.062665	73.4945	0	C1203	74.07	A6802	0.0612
High	EGYPGQRYY	3	1	1	P34896		0	1.73304e+06	0.004	0.01695	2.05248	2	1132.51	2.02466	49.0327	0	C1203	51.85	C1203	0.3641
High	DVVTPLWTV	4	1	1	Q8IZ69		0	487689	0.004	0.01589	2.04423	2	1029.56	-0.593083	99.6233	0	C1203	40.74	A6802	0.017
High	ETAAFIERL	2	1	1	Q5UCC4		0	0	0.004	0.01316	2.02737	2	1049.56	0.375947	69.2347	0	C1203	74.07	A6802	0.0152
High	TKAKNVSSY	2	1	1	Q9UNF0		0	373925	0.004	0.01501	2.02065	2	997.531	-0.503225	19.666	0	C1203	44.44	B1503	0.0229
High	GQFQKIVLY	4	1	1	P53675		0	1.78638e+06	0.004	0.0155	1.97884	2	1095.62	-0.727641	69.7241	0	C1203	48.15	B1503	0.0079
High	HSAPFSWET	4	1	1	Q9H425		0	6.38359e+06	0.004	0.01314	1.96971	2	1061.47	-0.848131	62.3867	0	C1203	44.44	A6802	0.7945
High	ESSYIFVSV	6	1	1	P42336		0	2.6488e+06	0.004	0.01464	1.9549	2	1030.51	-0.452892	86.9699	0	C1203	74.07	A6802	0.0172
High	ETQKSIYYI	21	1	1	P08238		0	5.50559e+07	0.004	0.01702	1.87093	2	1144.59	-0.687773	60.5927	0	C1203	62.96	A6802	0.058
High	EVFTHYDLL	1	2	2	Q9Y4K0;Q96JB6		0	901379	0.004	0.01589	1.76109	2	1136.56	-0.302714	77.4464	0	C1203	40.74	A6802	0.1136
High	KKIEDNNTL	18	1	1	P62750		0	2.13162e+07	0.005	0.01937	3.2266	2	1074.58	-0.3261	27.7686	0	C1203	44.44	B1503	0.2575
High	VTTDIQVKV	1	1	1	O00267		0	2.69827e+07	0.005	0.01715	2.99703	2	1002.58	-2.35019	57.6943	0	C1203	77.78	A6802	0.0369
High	GKAEVAVTLY	1	1	1	Q9NSG2		0	1.27678e+06	0.005	0.0191	2.95151	2	1050.58	-0.441822	59.9764	0	C1203	28.57	B1503	0.256
High	GQRKGAGSVF	26	1	1	P62917		0	1.46689e+07	0.005	0.01915	2.89687	2	1006.54	-0.683934	30.3663	0	C1203	42.86	B1503	0.0549
High	LVANIIQNV	22	1	1	O94915		0	5.63528e+06	0.005	0.0205	2.86269	2	983.588	-0.459584	79.8667	0	C1203	44.44	A6802	0.0264
High	AAAAAQSVY	1	1	1	P07203		0	912096	0.005	0.01937	2.85681	2	851.426	-0.170956	42.6574	0	C1203	85.19	B1503	0.1505
High	FANGHVNSV	2	1	1	Q9NRL2		0	1.87144e+06	0.005	0.01797	2.77172	2	944.458	-0.0737754	37.5341	0	C1203	85.19	C1203	0.0128
High	AAAELIKEV	9	1	1	Q13425		0	5.63785e+06	0.005	0.01846	2.74172	2	943.545	-1.27812	58.2585	0	C1203	96.3	C1203	0.2775
High	GQINGTTGY	1	1	1	Q9Y2Z2		0	473355	0.005	0.01921	2.676	2	910.426	-0.213274	42.8628	0	C1203	37.04	B1503	0.0054
High	KANPGAWIL	4	2	2	Q9NYU2;Q9NYU1		0	6.99501e+06	0.005	0.01887	2.66321	2	969.552	-0.186751	71.3682	0	C1203	81.48	C1203	0.1562
High	SVSAVIVRA	11	1	1	Q68CR1		0	4.79699e+06	0.005	0.01945	2.66138	2	901.546	-0.783431	52.0261	0	C1203	11.11	A6802	0.1134
High	FTSNTHSSV	1	2	2	Q9P2N7;Q9P2J3		0	1.23464e+06	0.005	0.02139	2.65386	2	979.448	-0.422622	30.3163	0	C1203	74.07	A6802	0.056
High	NASPVISSV	13	1	1	Q96T58		0	6.65543e+06	0.005	0.02051	2.63715	2	873.468	-0.0966314	57.7836	0	C1203	88.89	A6802	0.01
High	AKFSRPAQL	8	1	1	P22314		0	2.31692e+06	0.005	0.0191	2.56278	2	1017.58	-1.08881	41.6685	0	C1203	51.85	B1503	0.2105
High	RAAGVVLEm	2	1	1	Q9Y230	M9(Oxidation)	0	1.16915e+06	0.005	0.0197	2.55609	2	961.514	0.0011476	43.7319	0	C1203	85.19	C1203	0.0094
High	GKPVQGVAY	2	2	2	P0C0L4;P0C0L5		0	1.129e+06	0.005	0.02047	2.5393	2	918.504	-0.66473	40.0077	0	C1203	40.74	B1503	0.4468
High	ASGLIHRV	3	1	1	Q8N6L1		0	1.10388e+07	0.005	0.01999	2.51366	2	852.505	-0.141804	51.6178	0	C1203	70	A6802	14.5201
High	HQIKSLQY	9	1	1	Q9NW82		0	5.64295e+06	0.005	0.01889	2.50885	2	1016.55	-0.616716	38.32	0	C1203	26.67	B1503	0.0968
High	DIFTHYDIL	1	1	1	P58215		0	1.09439e+06	0.005	0.02106	2.49788	2	1136.56	-0.302714	77.7826	0	C1203	40.74	A6802	1.2342
High	AKLDVFQSY	1	1	1	Q13439		0	633860	0.005	0.02092	2.44882	2	1070.55	-0.49156	66.5661	0	C1203	44.44	B1503	0.0081
High	TSYPDPILL	12	1	1	P50591		0	4.0302e+06	0.005	0.01913	2.43995	2	1018.55	-0.0515538	89.8037	0	C1203	85.19	C1203	0.0431
High	VQFDGTNSAF	1	1	1	Q8WWK9		0	1.84268e+06	0.005	0.01974	2.434	2	1085.49	-0.961935	68.3145	0	C1203	51.43	B1503	0.005
High	VAFPTEIKV	3	1	1	Q9BPX7		0	8.23446e+06	0.005	0.0203	2.42542	2	1003.58	-1.08306	73.9463	0	C1203	92.59	C1203	0.1755
High	EVPPPFTLV	23	1	1	Q8NI35		0	2.19213e+07	0.005	0.0203	2.42539	2	998.556	-0.171957	94.8239	0	C1203	44.44	A6802	0.0081
High	FASEVSNVL	6	1	1	Q92783		0	2.1297e+06	0.005	0.01924	2.42314	2	965.494	-0.251056	73.1778	0	C1203	88.89	C1203	0.0226
High	EAFHYIFNV	17	1	1	Q9UEY8		0	3.01691e+07	0.005	0.02088	2.41657	2	1139.55	0.534072	83.2966	0	C1203	81.48	A6802	0.0266
High	DAARAIAGV	10	1	1	O75821		0	4.36323e+06	0.005	0.01957	2.41527	2	843.469	0.239675	48.7579	0	C1203	81.48	A6802	0.0326
High	HAVEWPVVm	8	1	1	Q13535	M9(Oxidation)	0	2.8333e+06	0.005	0.01964	2.4033	2	1083.53	-0.801445	70.2256	0	C1203	81.48	C1203	0.021
High	TSSKVIQSV	7	1	1	O14976		0	3.82336e+06	0.005	0.02079	2.35142	2	948.536	0.179378	39.3492	0	C1203	74.07	A6802	0.1549
High	GQVQKIVLY	10	1	1	Q00610		0	3.7608e+06	0.005	0.01847	2.34712	2	1047.62	-1.69315	60.7065	0	C1203	44.44	B1503	0.0174
High	ETIESINQL	11	2	2	Q92925;Q6STE5		0	5.14672e+06	0.005	0.02062	2.30975	2	1046.54	-0.744523	70.7731	0	C1203	74.07	A6802	0.0076
High	EASAVIQGL	17	1	1	Q8IWA0		0	4.51702e+07	0.005	0.02067	2.28245	2	887.483	-0.134543	69.2904	0	C1203	81.48	A6802	0.075
High	NKWEVPSVY	1	1	1	Q75QN2		0	2.72173e+06	0.005	0.01733	2.25143	2	1121.56	-1.04527	68.4817	0	C1203	48.15	B1503	0.0655
High	EVTKLQQQV	3	1	1	Q9NVF7		0	1.41105e+06	0.005	0.02088	2.25079	2	1072.6	-0.647658	42.5401	0	C1203	37.04	A6802	0.2264
High	EVLQILTQV	3	1	1	Q9Y6V7		0	1.53772e+06	0.005	0.01924	2.2447	2	1042.61	-0.258993	93.0772	0	C1203	37.04	A6802	0.0311
High	FKVGDPEEY	1	1	1	Q8WYP3		0	0	0.005	0.02073	2.24391	2	1083.5	-0.380558	56.274	0	C1203	51.85	B1503	0.3282
High	HTAEITHEI	5	1	1	Q00597		0	2.16839e+06	0.005	0.0212	2.24348	2	1050.52	-0.416562	38.4134	0	C1203	70.37	A6802	0.0021
High	SALEHVVEF	8	1	1	O75581		0	7.42493e+06	0.005	0.01732	2.23704	2	1030.52	-0.353385	69.4578	0	C1203	81.48	C1203	0.0225
High	AQFKGTQSL	3	1	1	Q9UK61		0	8.45383e+06	0.005	0.02099	2.22241	2	979.521	-0.0855709	43.5623	0	C1203	44.44	B1503	0.0068
High	EVISKTPTL	2	1	1	Q8IUR6		0	1.91857e+06	0.005	0.01922	2.21582	2	987.571	-0.742836	54.1862	0	C1203	44.44	A6802	0.0382
High	EIQGNINHV	6	1	1	Q86VI3		0	2.00636e+06	0.005	0.01984	2.18522	2	1023.52	-0.759738	41.8868	0	C1203	44.44	A6802	0.0775
High	HAFDGRPSVA	4	1	1	Q17R31		0	2.31825e+06	0.005	0.02002	2.13059	2	1056.52	-0.142964	37.4781	0	C1203	60	A6802	1.5652
High	AQLGLGHSY	1	1	1	O00567		0	998540	0.005	0.01733	2.09308	2	945.478	-0.917412	50.5689	0	C1203	44.44	B1503	0.0027
High	NTSSTNHQL	1	1	1	Q9H992		0	1.11325e+06	0.005	0.01998	2.06287	2	1001.46	-0.277826	23.5341	0	C1203	74.07	A6802	0.1248
High	ESFDGSVRA	5	1	1	P19338		0	4.92432e+06	0.005	0.02125	1.88092	2	967.447	-1.08976	42.7306	0	C1203	40.74	A6802	0.06
High	GQAGmHATY	2	1	1	O96008	M5(Oxidation)	0	530017	0.005	0.01753	1.84943	2	951.4	0.626862	24.2265	0	C1203	48.15	B1503	0.0055
High	SQVPRSSSm	4	1	1	Q9H992	M9(Oxidation)	0	1.01157e+06	0.005	0.01872	1.62845	2	994.462	-0.306335	20.0977	0	C1203	37.04	B1503	0.0134
High	QSVDLVFPV	6	1	1	Q9NQ31		0	2.52142e+07	0.005	0.02063	1.46334	2	1003.55	-0.401088	94.6624	0	C1203	74.07	A6802	0.1091
High	VKIAGGTSL	2	1	1	Q9H6T0		0	968749	0.006	0.02706	3.26833	2	845.511	1.66094	48.5683	0	C1203	40.74	B1503	0.0432
High	LTFAGVKMY	1	1	1	P58511		0	0	0.006	0.02505	3.02702	2	1029.54	-0.060735	76.6263	0	C1203	77.78	C1203	0.1983
High	TVFSHAQTV	17	2	2	Q71UM5;P42677		0	2.58755e+07	0.006	0.02825	2.83555	2	989.504	-0.789527	45.9606	0	C1203	48.15	A6802	0.0314
High	YTANFVNAI	11	1	1	Q7L1W4		0	5.24253e+06	0.006	0.02386	2.76112	2	1012.51	-0.519854	78.1598	0	C1203	70.37	A6802	0.0086
High	NAYPSPQLL	3	1	1	Q96AY2		0	1.72985e+06	0.006	0.02478	2.76024	2	1002.53	-0.428206	75.6817	0	C1203	88.89	C1203	0.0119
High	LSKDGVLYV	13	1	1	Q9H1A4		0	6.86505e+06	0.006	0.02652	2.71781	2	993.561	-0.665939	61.3078	0	C1203	77.78	C1203	0.3348
High	EIASITEQL	7	1	1	Q5UIP0		0	1.74704e+07	0.006	0.02496	2.68135	2	1003.53	-0.0957849	74.1235	0	C1203	44.44	A6802	0.0153
High	MTKEISSV	5	1	1	P78527		0	3.79321e+06	0.006	0.02459	2.66214	2	894.46	-0.0801921	38.4675	0	C1203	73.33	A6802	2.8559
High	HKIEAGNEF	8	1	1	O43293		0	3.91335e+06	0.006	0.02492	2.64927	2	1044.51	-0.486089	36.1136	0	C1203	37.04	B1503	0.0147
High	ETISPSGQGV	1	1	1	P23610		0	0	0.006	0.02552	2.64736	2	974.479	0.405735	48.1366	0	C1203	51.43	A6802	0.0385
High	GKGKFGNVY	11	3	3	O14965;Q96GD4;Q9UQB9		0	6.43762e+06	0.006	0.02526	2.63818	2	969.515	-0.225941	36.3043	0	C1203	40.74	B1503	0.0932
High	LKNGALVVY	2	1	1	Q8IVB5		0	2.83308e+06	0.006	0.02209	2.59558	2	976.583	0.184286	58.3639	0	C1203	48.15	B1503	0.0273
High	EVYPGTYSV	8	1	1	Q9NQ31		0	9.57699e+06	0.006	0.02501	2.57607	2	1014.48	-1.48386	64.4448	0	C1203	48.15	A6802	0.0009
High	GQFPGHNEF	24	1	1	Q9UKI2		0	1.24686e+07	0.006	0.02633	2.56746	2	1032.45	-0.940598	52.0166	0	C1203	44.44	B1503	0.0015
High	STADFQVGV	5	1	1	Q9BYK8		0	4.1326e+06	0.006	0.02254	2.55052	2	923.447	-0.313459	67.1482	0	C1203	77.78	A6802	0.0029
High	STASILASV	6	1	1	O60716		0	2.29647e+06	0.006	0.02427	2.54915	2	848.472	-0.0148821	74.4051	0	C1203	74.07	A6802	0.0035
High	SAYAQIVQF	15	1	1	Q9Y4W6		0	1.26576e+07	0.006	0.02686	2.5415	2	1026.53	-0.418195	81.5401	0	C1203	77.78	C1203	0.0098
High	GQKENVVVY	2	1	1	Q2NKX8		0	1.62684e+06	0.006	0.02925	2.53973	2	1035.55	-0.51855	44.6791	0	C1203	51.85	B1503	0.0059
High	TTASIATTL	1	1	1	O60331		0	1.64356e+06	0.006	0.02844	2.48851	2	878.483	0.123537	63.715	0	C1203	77.78	A6802	0.0193
High	GAFGKPSSL	12	1	1	Q8IVT2		0	3.26935e+06	0.006	0.0273	2.48507	2	863.462	-0.124578	48.1663	0	C1203	85.19	C1203	0.0147
High	EASHITEQQL	8	1	1	Q9BV73		0	3.05581e+06	0.006	0.02828	2.45941	2	1155.56	-0.587773	44.2196	0	C1203	62.86	A6802	1.2743
High	ETNLDSLPL	6	1	1	P08670		0	2.30763e+06	0.006	0.02472	2.44778	2	1001.51	-0.37573	81.9587	0	C1203	70.37	A6802	0.5104
High	HSVYITSRV	6	1	1	Q8N961		0	3.17352e+06	0.006	0.0273	2.44586	2	1061.57	-0.864495	42.4418	0	C1203	66.67	A6802	0.052
High	STYPAPFYV	4	1	1	P15923		0	1.73218e+06	0.006	0.02566	2.44313	2	1044.5	0.0176238	84.9954	0	C1203	81.48	A6802	0.0045
High	SASKIIVFV	13	1	1	O15439		0	3.7599e+06	0.006	0.02701	2.42825	2	963.587	-0.445874	73.7129	0	C1203	85.19	A6802	0.0512
High	LTTAPPPGL	5	1	1	Q14332		0	3.84671e+06	0.006	0.0259	2.42031	2	866.498	-0.099009	67.0439	0	C1203	70.37	A6802	0.6468
High	SASPIFTHV	5	1	1	Q9HCG8		0	2.82081e+06	0.006	0.02573	2.40313	2	958.499	-0.484512	59.8867	0	C1203	85.19	A6802	0.0323
High	EVFGVIRSL	1	1	1	Q15393		0	1.63274e+06	0.006	0.0232	2.40083	2	1019.59	-1.11165	78.8206	0	C1203	51.85	A6802	0.0286
High	GKHQPHKVTQY	2	2	2	P83881;Q969Q0		0	822291	0.006	0.02183	2.35227	3	1322.7	-0.028011	15.3327	0		0	B1503	1.4107
High	LSFPYSYEV	1	1	1	Q53EP0		0	743048	0.006	0.02734	2.34084	2	1104.52	-0.878198	88.9158	0	C1203	81.48	A6802	0.1829
High	QSLIPFVQL	1	1	1	P54278		0	1.56547e+07	0.006	0.02924	2.29701	2	1044.61	-0.387958	102.83	0	C1203	70.37	C1203	1.4238
High	NSSQVVVAV	21	1	1	Q16531		0	1.38835e+08	0.006	0.02213	2.23657	2	902.493	-1.04001	59.1845	0	C1203	77.78	A6802	0.0339
High	RQVGATVEF	8	1	1	Q13432		0	4.30087e+06	0.006	0.02689	2.22358	2	1006.53	-0.735111	53.4883	0	C1203	40.74	B1503	0.0032
High	EVAKMIQEV	8	1	1	Q9NRD5		0	2.85816e+06	0.006	0.02596	2.21968	2	1046.55	-0.718942	57.0325	0	C1203	48.15	A6802	0.0091
High	EVFLKAFAV	2	1	1	O95373		0	906189	0.006	0.022	2.21889	2	1023.59	-0.668023	83.2996	0	C1203	40.74	A6802	0.0388
High	SQDPGTHVV	7	1	1	Q9H8H0		0	6.17493e+06	0.006	0.02595	2.21826	2	939.453	-0.281986	34.6884	0	C1203	48.15	B1503	0.7661
High	TAFPKPLLT	9	1	1	Q9BZG8		0	8.03857e+06	0.006	0.02836	2.2094	2	987.587	-0.249632	67.5819	0	C1203	55.56	C1203	0.9088
High	ETSELVHSL	5	1	1	Q9Y2I8		0	1.06369e+06	0.006	0.02883	2.14391	2	1014.51	-0.431811	55.3896	0	C1203	77.78	A6802	0.0079
High	TVFNFPVSI	1	1	1	P28562		0	1.02327e+06	0.006	0.02875	2.06653	2	1023.55	-1.59962	101.997	0	C1203	40.74	A6802	0.0165
High	EVFSSFAHA	11	1	1	O60502		0	1.82326e+07	0.006	0.0273	2.04438	2	994.462	-0.586677	61.1238	0	C1203	7.41	A6802	0.035
High	QQNPQPLIF	4	1	1	O00170		0	8.59189e+06	0.006	0.02725	1.94153	2	1084.58	-0.40449	80.4704	0	C1203	44.44	B1503	0.0054
High	DSFNYFINV	7	1	1	Q9NW08		0	1.5532e+06	0.006	0.02338	1.92816	2	1118.51	-0.458817	97.8015	0	C1203	74.07	A6802	0.0663
High	AAFQEAFYV	5	1	1	Q9UNN5		0	4.23848e+06	0.006	0.02617	1.8919	2	1045.5	-0.245313	85.5985	0	C1203	81.48	A6802	0.2842
High	NTYGFPIIF	3	1	1	P11498		0	1.67897e+06	0.006	0.02418	1.82636	2	1071.55	0.190154	107.014	0	C1203	74.07	C1203	0.073
High	EVYTPKEIFV	1	1	1	O95297		0	1.23769e+06	0.006	0.0235	1.81246	2	1224.65	-0.649285	73.8687	0	C1203	31.43	A6802	0.0955
High	EAFGQSFSI	7	1	1	Q96G01		0	1.40441e+06	0.007	0.03302	2.98087	2	985.462	-0.257166	81.9357	0	C1203	74.07	A6802	0.0271
High	GKVKSGGTYF	3	1	1	P55017		0	2.05779e+06	0.007	0.02965	2.81277	2	1043.55	-0.479161	35.5724	0	C1203	31.43	B1503	0.3228
High	EVIDAQAEL	1	1	1	Q9Y2F9		0	536126	0.007	0.0303	2.74316	2	987.499	-0.427681	66.8611	0	C1203	44.44	A6802	0.01
High	TATEIAINV	3	1	1	Q86XP1		0	742828	0.007	0.03063	2.63735	2	931.509	-0.0904845	71.7828	0	C1203	81.48	A6802	0.0342
High	KKDDAITAY	4	1	1	Q9BY77		0	1.4859e+06	0.007	0.0324	2.61915	2	1024.53	-0.177625	33.7207	0	C1203	44.44	B1503	0.0249
High	SQGPTLQF	12	1	1	Q15022		0	3.06095e+06	0.007	0.03206	2.61883	2	877.441	-0.0552589	70.0345	0	C1203	33.33	B1503	0.3176
High	QLPNFAFSV	4	1	1	Q9BQ70		0	1.80936e+06	0.007	0.03038	2.55559	2	1022.53	-0.214398	94.7677	0	C1203	37.04	A6802	0.4984
High	AAFDKIQQL	13	1	1	Q9P2I0		0	5.38618e+06	0.007	0.03071	2.55129	2	1033.57	-0.281441	62.5412	0	C1203	88.89	C1203	0.0051
High	YKVASAEY	1	1	1	Q15014		0	1.03005e+06	0.007	0.03415	2.54151	2	930.457	-0.227595	42.3994	0	C1203	40	B1503	0.5698
High	KIYEEPIIL	1	1	1	Q9Y620		0	904320	0.007	0.03081	2.47789	2	1117.65	-0.495171	75.4284	0	C1203	51.85	C1203	0.1338
High	GKLISVEY	1	1	1	Q8IVG5		0	2.64266e+06	0.007	0.03364	2.46758	2	908.509	0.117111	59.4498	0	C1203	36.67	B1503	1.2584
High	RQGTPLIAF	7	1	1	Q2NL82		0	1.59157e+07	0.007	0.03078	2.4498	2	1002.57	-0.338923	71.3952	0	C1203	33.33	B1503	0.0066
High	DVFDKFISA	7	1	1	O43301		0	2.00899e+06	0.007	0.03141	2.43371	2	1041.52	-0.700549	80.5474	0	C1203	11.11	A6802	0.0268
High	FKIPSNTTL	1	1	1	Q8TEY7		0	0	0.007	0.02991	2.40148	2	1020.57	0.333347	65.4993	0	C1203	51.85	B1503	0.1014
High	GKISKQEAY	1	1	1	P20936		0	531092	0.007	0.03356	2.35084	2	1023.55	-0.405367	26.6923	0	C1203	40.74	B1503	0.1051
High	AKPEYISKTY	1	1	1	Q13823		0	577887	0.007	0.03181	2.34046	3	1199.63	0.651918	38.6136	0	C1203	31.43	B1503	0.4421
High	ETFAFIQQL	7	1	1	Q8WXH0		0	1.51151e+06	0.007	0.0313	2.25366	2	1096.57	-0.511816	96.0032	0	C1203	74.07	A6802	0.0148
High	RAYDGTTYL	5	1	1	Q53GS9		0	6.12562e+06	0.007	0.03154	2.25252	2	1059.51	-1.75242	52.1801	0	C1203	81.48	C1203	0.0009
High	FVFPGELLL	5	1	1	Q15758		0	4.26986e+06	0.007	0.03364	2.23026	2	1034.59	-0.532545	107.971	0	C1203	55.56	C1203	0.0124
High	TLADIIIGI	3	1	1	Q9NP58		0	418594	0.007	0.03051	2.2297	2	928.571	-0.474761	105.225	0	C1203	44.44	A6802	0.0203
High	AKLPSETIF	4	1	1	P57678		0	2.68351e+06	0.007	0.03426	2.16283	2	1005.56	-0.0609599	67.1197	0	C1203	40.74	B1503	0.0346
High	DQSYVISFV	2	1	1	O60488		0	974888	0.007	0.03201	2.15987	2	1057.52	-0.936846	93.7033	0	C1203	44.44	A6802	0.6442
High	VQGPVGTDF	2	1	1	O43670		0	2.47533e+06	0.007	0.0307	2.15778	2	919.452	-0.0091024	64.0246	0	C1203	40.74	B1503	0.0168
High	ESFGNEIYTV	4	1	1	O43148		0	1.65209e+06	0.007	0.02963	2.15274	2	1158.53	0.349218	76.3575	0	C1203	57.14	A6802	0.0634
High	HTFYNELRV	3	10	10	Q562R1;Q9BYX7;P60709;P68032;P63261;P68133;Q6S8J3;A5A3E0;P0CG38;P0CG39		0	2.47103e+06	0.007	0.03072	2.13364	2	1178.6	-0.041454	58.2514	0	C1203	74.07	A6802	0.0419
High	LAAPVISVL	12	1	1	O60337		0	7.68223e+06	0.007	0.03399	2.09302	2	882.566	-0.306955	93.1626	0	C1203	92.59	C1203	0.0085
High	FAYPAPLEV	3	1	1	Q99460		0	1.10208e+06	0.007	0.03136	2.03829	2	1006.52	0.0709336	88.077	0	C1203	100	C1203	0.0027
High	IVTEIISEI	2	1	1	Q9BPX3		0	4.08039e+06	0.007	0.03263	2.01933	2	1016.59	-0.48165	89.5088	0	C1203	40.74	A6802	0.1107
High	FTADKYHVV	1	1	1	Q8TED0		0	1.26179e+06	0.007	0.03082	1.92032	2	1079.55	-0.340844	47.4571	0	C1203	81.48	A6802	0.0077
High	TIPDFIFANV	4	1	1	P61073		0	1.1289e+06	0.007	0.03159	1.88757	2	1136.6	-0.224379	104.713	0	C1203	28.57	A6802	0.1469
High	EVTEIISQF	1	1	1	Q99996		0	256288	0.007	0.03232	1.75302	2	1065.55	-0.228234	85.0862	0	C1203	37.04	A6802	0.3684
High	EAADVLIKA	8	1	1	Q7Z6Z7		0	1.36826e+07	0.007	0.03267	1.60773	2	929.53	-0.7452	55.5768	0	C1203	48.15	A6802	0.0313
High	SKLKNGLTF	1	1	1	Q6ZSZ5		0	1.26234e+06	0.008	0.03508	2.65782	2	1007.59	-0.388061	46.8375	0	C1203	37.04	B1503	0.0212
High	RQSVAGTY	3	1	1	Q9BX59		0	1.08035e+06	0.008	0.03629	2.6176	2	881.448	0.111334	31.7399	0	C1203	30	B1503	0.066
High	KKSEGSLAY	1	1	1	Q96KP1		0	1.54525e+06	0.008	0.03435	2.55355	2	982.52	-0.484713	28.6161	0	C1203	48.15	B1503	0.0093
High	EVSRVLEQV	12	1	1	Q96R06		0	3.98191e+06	0.008	0.03698	2.54887	2	1058.58	-0.526749	55.8932	0	C1203	40.74	A6802	0.0149
High	RQLPAMTAL	3	1	1	Q13045		0	2.59554e+06	0.008	0.03457	2.52764	2	1000.56	0.272337	63.0386	0	C1203	44.44	B1503	0.0154
High	EIYSFSESL	1	1	1	P13010		0	585521	0.008	0.03526	2.4968	2	1074.5	-0.0580122	81.9139	0	C1203	44.44	A6802	0.0393
High	mLIDTLGASI	1	1	1	O15084	M1(Oxidation)	0	902596	0.008	0.03488	2.49045	2	1049.55	-3.77061	95.8566	0	C1203	22.86	A6802	1.8329
High	VHPPPTTTY	4	1	1	Q969N2		0	8.00318e+06	0.008	0.03632	2.44624	2	1012.51	-0.208573	41.6616	0	C1203	51.85	B1503	0.1327
High	GKVTEETVY	2	1	1	P40937		0	998525	0.008	0.03569	2.39484	2	1025.51	-1.01187	40.7102	0	C1203	40.74	B1503	0.1705
High	HAIDRVTTSV	1	1	1	Q9BTT6		0	914280	0.008	0.0372	2.32422	2	1098.59	-1.54082	40.3207	0	C1203	60	A6802	0.0587
High	NIFRNVEV	1	2	2	Q7L523;Q5VZM2		0	2.08781e+07	0.008	0.03646	2.20922	2	990.535	-1.99357	64.7357	0	C1203	50	A6802	4.4054
High	SVYPNGHFV	5	1	1	Q8TF46		0	4.69777e+06	0.008	0.03729	2.1712	2	1019.49	-0.575989	56.8138	0	C1203	48.15	A6802	0.0121
High	VIYPARISL	2	1	1	P25685		0	1.38627e+06	0.008	0.03429	1.96464	2	1031.63	0.209668	72.8365	0	C1203	55.56	C1203	0.0097
High	TQAPIFISF	6	1	1	Q15070		0	1.61212e+06	0.008	0.03827	1.91951	2	1023.55	-0.64553	98.3664	0	C1203	44.44	B1503	0.0037
High	FSQGEVImDF	1	1	1	Q8IZF5	M8(Oxidation)	0	780700	0.008	0.03453	1.78086	2	1188.52	0.00102701	79.8128	0	C1203	60	B1503	3.9725
High	YKKGKDSLY	2	2	2	P83881;Q969Q0		0	482885	0.008	0.03496	1.5821	2	1101.59	-0.214028	26.2104	0	C1203	44.44	B1503	0.1869
High	GKLGGQDSF	2	1	1	P14921		0	463698	0.009	0.03883	2.80019	2	908.447	0.0461488	41.6087	0	C1203	33.33	B1503	0.1897
High	GKSFTTVY	1	2	2	P98168;P98169		0	1.15707e+06	0.009	0.04405	2.68944	2	902.462	0.617873	48.5434	0	C1203	30	B1503	0.8325
High	GKRIGVFSY	6	1	1	Q01581		0	5.39268e+06	0.009	0.04335	2.56308	2	1026.57	-0.796901	55.5309	0	C1203	40.74	B1503	0.081
High	VTFSGIHLL	5	1	1	Q8N3Z3		0	848522	0.009	0.03863	2.56126	2	986.567	-0.349034	83.6386	0	C1203	81.48	C1203	0.0373
High	GKAPSSSQL	3	1	1	Q9NVE5		0	580617	0.009	0.03987	2.54976	2	874.463	-0.2484	27.7449	0	C1203	48.15	B1503	0.7391
High	AAmPRPVSY	5	1	1	Q6TFL4	M3(Oxidation)	0	2.17024e+06	0.009	0.04314	2.51801	2	1007.5	-0.257144	40.2317	0	C1203	92.59	C1203	0.0044
High	ATSDLVNAI	1	1	1	Q9Y490		0	1.24168e+06	0.009	0.03934	2.43021	2	903.478	-0.105506	69.0419	0	C1203	74.07	A6802	0.0808
High	VAYSHPTTV	3	1	1	Q96KR1		0	767367	0.009	0.04147	2.41703	2	974.493	-1.63161	41.0562	0	C1203	92.59	C1203	0.0037
High	EASSVKNEL	2	1	1	Q9P2D1		0	3.18914e+06	0.009	0.04237	2.36393	2	976.494	-0.43326	37.0904	0	C1203	85.19	A6802	0.4395
High	FAMTNQIL	3	1	1	P31327		0	963766	0.009	0.04377	2.36288	2	937.481	-0.611086	81.0621	0	C1203	83.33	C1203	1.5429
High	SQYPGAKY	1	1	1	P24928		0	1.59267e+06	0.009	0.03861	2.34027	2	913.441	-0.0980047	36.9158	0	C1203	30	B1503	0.0147
High	ETAKLIEKL	7	1	1	P13639		0	8.81232e+07	0.009	0.04233	2.23137	2	1044.63	-1.34369	51.2478	0	C1203	74.07	A6802	0.0498
High	FLYPFPLAL	1	1	1	Q5BJD5		0	1.66055e+06	0.009	0.0417	2.11258	2	1080.61	-0.706224	107.96	0	C1203	59.26	C1203	0.0127
High	HTVGFILQL	4	1	1	Q5SRE5		0	3.15346e+06	0.009	0.04274	2.08179	2	1027.59	-0.334814	87.3258	0	C1203	77.78	A6802	0.0263
High	EGVDIILGV	2	1	1	P11171		0	1.50727e+06	0.009	0.04115	2.06736	2	914.519	-0.0509468	93.7817	0	C1203	48.15	A6802	0.0662
High	ETIDLLVQI	1	1	1	Q9Y6X9		0	518936	0.009	0.04411	2.01335	2	1043.6	-0.269491	100.52	0	C1203	66.67	A6802	0.004
High	DVTQIVEIL	5	1	1	Q86XP3		0	1.8039e+06	0.009	0.0406	1.8596	2	1029.58	-0.367441	102.806	0	C1203	40.74	A6802	0.4342
High	KVPPFTFHV	5	1	1	Q6NZI2		0	2.68377e+06	0.009	0.04082	1.74241	2	1071.6	-1.08398	68.9887	0	C1203	44.44	A6802	0.1402
High	VVPQFVVFY	5	1	1	O14949		0	3.7027e+06	0.009	0.04376	1.72316	2	1097.6	-0.516315	101.874	0	C1203	48.15	C1203	0.8996
High	SHKPSGLVm	3	1	1	Q02750	M9(Oxidation)	0	479757	0.009	0.03855	1.66391	2	971.498	-0.392325	27.6601	0	C1203	44.44	B1503	0.3362
Medium	AKTQGNVF	3	1	1	O15371		0	3.7876e+06	0.01	0.04538	2.97144	2	864.457	-0.054688	36.3396	0	C1203	30	B1503	1.7013
Medium	LQAVELQGL	9	1	1	Q96HA7		0	5.39524e+06	0.01	0.04606	2.748	2	970.556	-0.514434	87.2327	0	C1203	40.74	B1503	1.3403
Medium	KTASINQNV	7	1	1	Q8NI77		0	9.28939e+06	0.01	0.04794	2.64969	2	974.526	-0.536389	32.1994	0	C1203	74.07	A6802	0.1703
Medium	AQRYLLQY	6	1	1	P25789		0	3.3664e+06	0.01	0.04787	2.56351	2	1054.57	-0.907576	61.6512	0	C1203	26.67	B1503	0.3586
Medium	SKAPDGSTL	3	1	1	Q9BXS9		0	655396	0.01	0.04808	2.52784	2	875.447	-0.121489	32.6399	0	C1203	51.85	B1503	0.3151
Medium	HKVISGTTL	2	1	1	Q9NUL3		0	2.96739e+06	0.01	0.04645	2.48143	2	955.557	-0.474149	38.0229	0	C1203	40.74	B1503	0.2142
Medium	EVAGIINDA	12	1	1	Q14008		0	1.26031e+07	0.01	0.04452	2.47753	2	901.462	-0.224516	61.6332	0	C1203	11.11	A6802	0.0324
Medium	SATGQKLYV	2	1	1	Q9Y2M0		0	1.62651e+06	0.01	0.04487	2.45332	2	966.525	-0.570453	45.3107	0	C1203	81.48	A6802	1.0581
Medium	EAVDLITRL	1	1	1	Q9P0M9		0	1.83775e+06	0.01	0.0471	2.44884	2	1029.59	-0.495256	75.7057	0	C1203	81.48	A6802	0.06
Medium	EVANLLQGV	1	1	1	Q5VIR6		0	1.75234e+06	0.01	0.045	2.33179	2	942.525	-0.217656	81.1515	0	C1203	40.74	A6802	0.0062
Medium	SQATPHSSY	3	1	1	Q49A88		0	844035	0.01	0.04637	2.30265	2	977.432	-0.575018	27.1214	0	C1203	40.74	B1503	0.0024
Medium	EVFPLGGVGA	1	1	1	Q9BWN1		0	709540	0.01	0.04587	2.26955	2	945.504	-0.31788	83.0435	0	C1203	14.29	A6802	0.1176
Medium	ESYHVPELI	10	1	1	P42704		0	5.03145e+06	0.01	0.0443	2.24972	2	1086.55	-0.518334	73.7784	0	C1203	66.67	A6802	0.1025
Medium	VmRAQGNVY	1	1	1	P61968	M2(Oxidation)	0	1.20262e+06	0.01	0.04424	2.18564	2	1053.51	-0.522646	33.2924	0	C1203	44.44	B1503	0.0547
Medium	ETFVGDYTL	4	1	1	P19174		0	2.20904e+06	0.01	0.04816	2.18432	2	1044.49	-0.467849	81.6633	0	C1203	74.07	A6802	0.0251
Medium	DAFPKRIL	2	1	1	O14628		0	1.73288e+06	0.01	0.0484	2.14376	2	959.567	-0.532782	76.1882	0	C1203	83.33	C1203	5.4072
Medium	GKEGQPREY	2	1	1	Q6P1J9		0	570933	0.01	0.0449	2.10298	2	1063.52	-0.775316	15.3119	0	C1203	51.85	B1503	0.9422
Medium	QAAGVSVHV	5	1	1	Q5T4B2		0	1.8306e+06	0.01	0.04636	2.0652	2	867.468	0.115379	45.2888	0	C1203	85.19	A6802	0.0169
Medium	RQFEFSVDSF	1	3	3	Q96IP4;Q5VWP2;Q8NEK8		0	738909	0.01	0.04631	2.06232	2	1261.59	0.527525	79.891	0	C1203	40	B1503	0.027
Medium	HSAEILAEI	2	1	1	Q6FI81		0	1.13999e+08	0.01	0.04551	2.01996	2	982.521	1.05813	67.1046	0	C1203	70.37	A6802	0.018
Medium	ITAPPSRVL	6	1	1	O00767		0	5.58697e+06	0.01	0.04711	2.01413	2	953.577	-0.473085	53.9509	0	C1203	85.19	C1203	0.0544
Medium	EVLDKRYNV	2	1	1	Q13523		0	2.88039e+06	0.01	0.04536	1.91866	2	1135.61	-0.320717	44.3148	0	C1203	40.74	A6802	0.03
Medium	RQIPQATASm	2	1	1	O43175	M10(Oxidation)	0	190349	0.01	0.04817	1.90862	2	1118.56	-0.67521	36.6826	0	C1203	28.57	B1503	0.0381
Medium	EVMKYITSL	2	1	1	P11586		0	1.11599e+06	0.01	0.04643	1.82893	2	1083.58	-0.351115	73.1526	0	C1203	40.74	A6802	0.0231
Medium	AATPAVRTV	17	2	2	P11940;Q9H361		0	3.33112e+07	0.01	0.04752	1.68515	2	885.516	0.292743	39.0434	0	C1203	96.3	C1203	0.1137
Medium	DTAPVIIFV	4	1	1	Q7Z2Z2		0	5.39938e+06	0.01	0.04561	1.66758	2	974.555	-0.364078	102.655	0	C1203	85.19	A6802	0.0034
Medium	STAPPAHGV	9	1	1	P15941		0	2.46587e+07	0.01	0.04745	1.51595	2	836.426	0.00325735	30.1618	0	C1203	77.78	A6802	0.0052
Medium	DIFDAmFSV	1	1	1	P10644	M6(Oxidation)	0	445407	0.01	0.04818	1.51584	2	1060.46	-0.817586	97.9144	0	C1203	44.44	A6802	0.0083
Medium	mQREPNQAF	3	1	1	Q13148	M1(Oxidation)	0	1.00455e+06	0.01	0.04443	1.46767	2	1136.52	-0.168922	37.6281	0	C1203	33.33	B1503	0.0012
Medium	SGYYRVSSY	1	1	1	Q9UNQ0		0	2.02277e+06	0.011	0.04883	2.79685	2	1081.5	2.38819	47.9096	0	C1203	44.44	C1203	0.065
Medium	AKLKGIGEY	6	1	1	Q92620		0	2.05342e+06	0.011	0.0537	2.76965	2	978.561	-0.524616	41.8652	0	C1203	48.15	B1503	0.0283
Medium	SATETINKL	3	1	1	P15924		0	1.78733e+06	0.011	0.05292	2.74236	2	976.53	-1.31139	45.3315	0	C1203	81.48	C1203	0.1654
Medium	GKGSFGEVF	8	2	2	Q9P289;Q9Y6E0		0	7.77259e+06	0.011	0.05223	2.72062	2	927.457	-0.429845	60.555	0	C1203	37.04	B1503	0.253
Medium	AQYDGAYKV	3	1	1	P11177		0	859580	0.011	0.04887	2.6883	2	1014.49	-0.83144	45.4417	0	C1203	48.15	B1503	0.1193
Medium	TTVELANKV	6	1	1	O75533		0	2.45355e+07	0.011	0.05191	2.63571	2	974.552	0.201304	48.7157	0	C1203	70.37	A6802	0.0153
Medium	EVDATSKYSV	1	1	1	Q9UK61		0	821132	0.011	0.04945	2.59049	2	1098.53	-0.409558	44.4632	0	C1203	25.71	A6802	0.4107
Medium	TTSAVTVKS	2	1	1	P61513		0	6.20599e+06	0.011	0.05321	2.55725	2	893.494	-0.396716	28.8418	0	C1203	37.04	A6802	1.5634
Medium	HAAHIISEL	4	1	1	Q96I24		0	4.10388e+06	0.011	0.05309	2.52669	2	990.535	-2.22995	49.8866	0	C1203	85.19	C1203	0.029
Medium	QKAEVGSPL	5	1	1	P0C7P0		0	3.41415e+06	0.011	0.05318	2.43418	2	928.51	-0.128282	42.4961	0	C1203	44.44	B1503	1.0156
Medium	RQIDQFLVV	6	2	2	O94776;Q9BTC8		0	6.87751e+06	0.011	0.05052	2.39439	2	1117.64	-0.719004	76.7774	0	C1203	48.15	B1503	0.0831
Medium	RKLTPGEVY	1	1	1	Q15818		0	1.20486e+06	0.011	0.0523	2.32378	2	1062.59	-2.38934	40.9555	0	C1203	40.74	B1503	0.0182
Medium	QAYPTTVVF	3	1	1	Q8IXB1		0	6.32031e+06	0.011	0.04984	2.27934	2	1025.53	-0.408126	79.9629	0	C1203	85.19	C1203	0.006
Medium	ETIRNYAQV	4	1	1	Q9Y6E2		0	9.7238e+06	0.011	0.04944	2.25504	2	1093.56	-2.15297	49.6882	0	C1203	66.67	A6802	0.0208
Medium	ETFYIGKLI	4	1	1	Q7KZ85		0	993256	0.011	0.05318	2.18147	2	1083.61	-0.623487	84.9657	0	C1203	66.67	A6802	0.0935
Medium	GQTGTGKTF	1	2	2	P52732;Q9Y496		0	795680	0.011	0.05118	2.1392	2	896.447	-0.418678	28.3938	0	C1203	40.74	B1503	0.0184
Medium	LAKVTAEV	5	1	1	P04843		0	1.50673e+06	0.011	0.05161	1.96098	2	830.498	-0.250285	45.333	0	C1203	86.67	C1203	7.1316
Medium	RQADFVQVL	5	1	1	Q9Y2V7		0	2.11705e+07	0.011	0.05164	1.81845	2	1075.59	-1.13135	68.4873	0	C1203	51.85	B1503	0.0104
Medium	ETHFTGNEV	4	1	1	Q9BX74		0	8.1081e+07	0.011	0.05099	1.80923	2	1033.46	-0.716071	39.8292	0	C1203	70.37	A6802	0.0515
Medium	FAmPYFIQV	5	1	1	Q00610	M3(Oxidation)	0	1.41738e+06	0.011	0.04914	1.78364	2	1131.55	-0.00655045	92.93	0	C1203	88.89	C1203	0.0468
Medium	IQTRGGTF	4	1	1	O14672		0	3.28404e+06	0.012	0.05547	2.81189	2	879.468	-0.0249952	37.7444	0	C1203	26.67	B1503	0.6922
Medium	EVVSHTSQV	4	1	1	Q8IX04		0	1.23357e+07	0.012	0.05427	2.52437	2	985.494	-0.506279	32.5138	0	C1203	40.74	A6802	0.0158
Medium	GKAEIARAY	1	1	1	Q9H1X3		0	205845	0.012	0.05623	2.48597	2	978.536	-0.333915	31.5607	0	C1203	48.15	B1503	0.0141
Medium	DTKAILEQI	4	1	1	Q6ZRV2		0	2.13582e+06	0.012	0.05431	2.48111	2	1030.58	-0.732855	71.3788	0	C1203	59.26	A6802	0.2102
Medium	EVNKVISSV	13	1	1	Q93008		0	2.45355e+07	0.012	0.05567	2.45818	2	974.551	-0.487614	48.717	0	C1203	40.74	A6802	0.0091
Medium	GKNGTGGLF	1	1	1	Q9ULW0		0	1.48381e+06	0.012	0.05425	2.39997	2	850.442	0.320892	46.5565	0	C1203	33.33	B1503	0.172
Medium	RQFmAETQF	1	1	1	Q14444	M4(Oxidation)	0	1.57242e+06	0.012	0.05483	2.39883	2	1173.54	-0.383781	54.3198	0	C1203	33.33	B1503	0.0046
Medium	STSAVNHNV	7	1	1	Q07157		0	3.90282e+06	0.012	0.05519	2.39684	2	928.448	-0.351866	25.7862	0	C1203	70.37	A6802	0.0123
Medium	EVDPNIQAV	7	1	1	P05787		0	6.35207e+06	0.012	0.05575	2.34687	2	984.499	-0.640187	60.4913	0	C1203	48.15	A6802	0.031
Medium	GAYGKVFLV	9	2	2	O75676;O75582		0	6.36255e+06	0.012	0.05553	2.31293	2	953.545	-0.386684	70.931	0	C1203	85.19	C1203	0.2158
Medium	mAAmATARV	2	1	1	Q15904	M1(Oxidation); M4(Oxidation)	0	681465	0.012	0.05556	2.28255	2	953.454	-0.873131	29.5657	0	C1203	77.78	A6802	0.0231
Medium	EVFPEFAAA	10	1	1	O15294		0	5.62702e+06	0.012	0.05666	2.25474	2	980.472	-0.593534	83.251	0	C1203	11.11	A6802	0.0163
Medium	AAAALVLKA	2	1	1	Q9Y490		0	2.28916e+06	0.012	0.05438	2.25209	2	827.535	0.133503	55.3727	0	C1203	51.85	A6802	2.3474
Medium	FTYGAVVHY	1	1	1	Q96PZ7		0	1.00804e+06	0.012	0.05501	2.13477	2	1056.51	-1.25308	64.5073	0	C1203	85.19	C1203	0.0087
Medium	GKAFSRSSY	1	3	3	Q8N9K5;Q7L945;P17097		0	565284	0.012	0.05576	2.06466	2	1002.5	-0.485593	30.0837	0	C1203	40.74	B1503	0.1169
Medium	AAFPIAVVA	1	1	1	Q53GS7		0	1.64308e+06	0.012	0.05689	2.04127	2	858.508	-0.084938	88.4619	0	C1203	59.26	C1203	0.2752
Medium	GLASLEQLY	1	1	1	Q92626		0	2.43962e+06	0.012	0.05628	1.94254	2	993.525	-0.591398	45.0008	0	C1203	44.44	B1503	1.1196
Medium	YAAPGGLIGV	4	2	2	Q2VIR3;P41091		0	7.50945e+06	0.012	0.05564	1.84424	2	917.509	-0.265505	79.0242	0	C1203	62.86	A6802	0.0946
Medium	TTVEDLGSKI	1	1	1	P35613		0	2.0806e+06	0.013	0.05764	3.08132	2	1062.57	-1.70882	58.8996	0	C1203	31.43	A6802	0.5539
Medium	DLSSVISKI	3	1	1	Q6PL18		0	1.37179e+06	0.013	0.05824	2.58256	2	961.556	-0.0387048	82.1128	0	C1203	40.74	A6802	0.5587
Medium	GKYGSSLEF	3	1	1	P55212		0	3.57414e+06	0.013	0.05797	2.56908	2	987.478	-0.457259	58.0308	0	C1203	44.44	B1503	0.008
Medium	FQKVITEY	7	1	1	Q7KZF4		0	1.59452e+06	0.013	0.05992	2.48223	2	1027.55	-0.550453	54.5012	0	C1203	56.67	B1503	0.1722
Medium	GKPPTWSEF	2	1	1	O95573		0	2.52974e+06	0.013	0.05993	2.47097	2	1048.51	-0.637503	62.7369	0	C1203	40.74	B1503	0.7285
Medium	EVSRALLEL	1	1	1	Q9UPN3		0	656196	0.013	0.0577	2.4438	2	1029.59	-0.376694	85.4723	0	C1203	48.15	A6802	0.2002
Medium	YTTDRVmTV	2	2	2	Q13547;Q92769	M7(Oxidation)	0	1.16578e+06	0.013	0.05996	2.29605	2	1101.52	-0.612779	44.3705	0	C1203	81.48	A6802	0.0094
Medium	AmYGGLVLF	2	1	1	Q9H3K2	M2(Oxidation)	0	2.57589e+06	0.013	0.06007	2.16155	2	986.501	-0.476501	98.5906	0	C1203	44.44	B1503	0.0186
Medium	EGAAVFWNV	9	1	1	Q9NWS8		0	2.43365e+06	0.013	0.05883	2.15164	2	992.484	0.090593	89.17	0	C1203	40.74	A6802	0.23
Medium	DIFGELFTQA	1	1	1	Q9Y6W5		0	130011	0.013	0.0573	2.0156	2	1140.56	-0.146302	106.041	0	C1203	11.43	A6802	0.8955
Medium	AKHESQQDY	1	1	1	Q14247		0	139200	0.013	0.05955	1.5713	2	1105.49	-0.00811828	17.3606	0	C1203	44.44	B1503	0.1579
Medium	KKFESPNIL	3	1	1	Q8NB16		0	5.86707e+06	0.014	0.06376	2.95818	2	1075.61	-0.907612	51.4448	0	C1203	48.15	B1503	0.0999
Medium	AQRAPGGLSY	3	1	1	Q5BJH7		0	1.19138e+06	0.014	0.0636	2.71025	2	1019.53	-1.0258	45.6934	0	C1203	45.71	B1503	0.0055
Medium	SKFYGELAL	1	1	1	P78527		0	636701	0.014	0.06157	2.64449	2	1027.55	-0.322589	71.8393	0	C1203	44.44	B1503	0.1902
Medium	SVQAPSYGA	1	1	1	P05783		0	577666	0.014	0.06305	2.60656	2	879.421	-0.207534	46.4193	0	C1203	0	A6802	0.6104
Medium	AKKPPVTF	11	1	1	Q14134		0	1.15416e+07	0.014	0.0646	2.59517	2	887.535	-0.276871	39.5327	0	C1203	36.67	B1503	0.5924
Medium	YQHDDGRVSY	1	1	1	P60983		0	702060	0.014	0.06598	2.40323	3	1239.54	0.617315	33.6152	0	C1203	40	B1503	0.0066
Medium	NQKEAVAY	3	1	1	Q03518		0	1.00704e+06	0.014	0.06199	2.3438	2	922.463	-0.0923035	31.9056	0	C1203	33.33	B1503	0.557
Medium	EVFGRVQGV	2	1	1	P14621		0	1.23173e+06	0.014	0.06196	2.16318	2	990.536	-0.52482	55.5728	0	C1203	48.15	A6802	0.0079
Medium	RAFGGILVV	1	1	1	Q8NHX9		0	11650116	0.014	0.06249	2.16072	2	931.572	-0.509126	77.7118	0	C1203	92.59	C1203	0.0088
Medium	TKADGTSTY	1	1	1	Q6Q0C0		0	362000	0.014	0.0648	2.15422	2	943.436	-0.374555	22.5702	0	C1203	48.15	B1503	0.0123
Medium	SVFPGARLL	1	1	1	Q86X55		0	1.77043e+06	0.014	0.06172	2.05825	2	959.567	-0.659996	75.8689	0	C1203	51.85	C1203	0.0065
Medium	SKSGGDYAY	4	3	3	Q9GIP4;Q8MH63;Q01650		0	2.36627e+06	0.014	0.0641	1.95008	2	947.41	-0.463919	31.5578	0	C1203	44.44	B1503	0.1166
Medium	DVTSTTSSRV	1	1	1	Q7Z2W4		0	406004	0.014	0.06135	1.67653	2	1052.52	-0.563853	35.1139	0	C1203	25.71	A6802	1.209
Medium	mVAPVWYLV	6	1	1	Q96HY6	M1(Oxidation)	0	1.12899e+06	0.014	0.06459	1.63881	2	1093.57	-0.665598	104.637	0	C1203	48.15	A6802	0.012
Medium	EIIQRIENV	2	1	1	Q9H074		0	2.16325e+06	0.015	0.06857	3.26398	2	1113.62	-2.11232	61.1874	0	C1203	40.74	A6802	0.0496
Medium	GKSGVAITF	3	1	1	Q9BUQ8		0	2.75293e+06	0.015	0.07088	2.69701	2	879.493	-0.317954	59.2274	0	C1203	44.44	B1503	0.0385
Medium	SAGEPRVL	6	1	1	Q9BRA0		0	2.14427e+06	0.015	0.07104	2.56414	2	828.457	0.00453818	42.0465	0	C1203	76.67	C1203	5.4911
Medium	GLKQADTVY	2	1	1	P31327		0	1.70192e+06	0.015	0.06881	2.55022	2	994.52	-0.356122	42.7095	0	C1203	40.74	B1503	0.2054
Medium	IQESISQEL	2	1	1	Q9NQ92		0	2.76601e+06	0.015	0.06931	2.51278	2	1046.54	-0.394596	82.858	0	C1203	44.44	B1503	0.5255
Medium	KQLEDGRTL	6	4	4	P62987;P62979;P0CG47;P0CG48		0	1.9756e+06	0.015	0.06893	2.35017	2	1059.58	-0.651599	32.2004	0	C1203	48.15	B1503	0.0435
Medium	HQFLSEQF	4	1	1	Q8TDB6		0	4.78226e+06	0.015	0.06896	2.34297	2	1035.49	-1.43764	63.9683	0	C1203	36.67	B1503	0.2817
Medium	EAMKQILGV	4	1	1	Q14444		0	3.0368e+06	0.015	0.06824	2.34123	2	988.549	-0.527476	65.1598	0	C1203	81.48	A6802	0.0393
Medium	EIADLVTSV	2	1	1	Q5MIZ7		0	1.85923e+06	0.015	0.07006	2.33816	2	946.509	-0.514215	80.0803	0	C1203	48.15	A6802	0.0038
Medium	EVSSSFDHV	3	1	1	Q9Y6C9		0	2.69469e+06	0.015	0.06929	2.30405	2	1006.45	-0.457199	47.5978	0	C1203	44.44	A6802	0.0279
Medium	TASELIGNEL	5	1	1	Q96QE3		0	2.86686e+06	0.015	0.06838	2.25033	2	1046.54	-0.170867	83.4958	0	C1203	60	A6802	1.1875
Medium	NTLQTKVQL	6	1	1	Q9NT22		0	1.94443e+07	0.015	0.06789	2.21327	2	1044.61	3.46995	103.094	0	C1203	70.37	A6802	0.6562
Medium	HTAIGAHPV	5	1	1	Q92567		0	2.56022e+06	0.015	0.0678	2.10521	2	902.484	-0.417717	31.4327	0	C1203	70.37	A6802	0.032
Medium	YVNLPTIAL	1	1	1	P08865		0	588023	0.015	0.06837	2.00904	2	1003.58	-1.12395	95.5299	0	C1203	44.44	C1203	0.0265
Medium	EGSPIKVTL	5	1	1	P06748		0	5.5532e+06	0.015	0.07079	1.93885	2	943.545	-0.685341	64.2575	0	C1203	55.56	A6802	0.9265
Medium	QAFPGGHSm	1	1	1	P49916	M9(Oxidation)	0	390413	0.015	0.06781	1.69753	2	947.403	-0.630517	35.6878	0	C1203	77.78	C1203	0.0056
Medium	DTVQFAEYI	2	1	1	P49721		0	379636	0.015	0.06834	1.61701	2	1085.51	-0.506124	89.1414	0	C1203	59.26	A6802	0.1114
Medium	YASGINVNL	1	1	1	A2VDJ0		0	2.69156e+06	0.016	0.07599	2.69305	2	950.494	-0.270614	72.7297	0	C1203	88.89	A6802	0.0377
Medium	AAFQEEFTV	3	1	1	P51116		0	2.01862e+06	0.016	0.07544	2.53474	2	1041.49	-0.570838	78.8758	0	C1203	85.19	C1203	0.6043
Medium	TTAKPQQIQA	5	1	1	P56192		0	1.24065e+06	0.016	0.07483	2.51714	2	1085.59	-0.649801	34.1958	0	C1203	22.86	A6802	1.2969
Medium	GKKGPQSLF	3	1	1	P46087		0	6.54248e+06	0.016	0.07561	2.49785	2	961.546	-0.353689	43.5734	0	C1203	33.33	B1503	0.2266
Medium	EVTDLVHNT	1	1	1	O75976		0	1.00178e+06	0.016	0.07513	2.48586	2	1027.5	-0.555607	47.2806	0	C1203	7.41	A6802	0.3086
Medium	QTHSVFVNV	3	1	1	Q9Y3A5		0	1.11796e+07	0.016	0.07567	2.43816	2	1030.53	-1.29085	57.441	0	C1203	74.07	A6802	0.0267
Medium	EAAELmQQV	2	1	1	Q15691	M6(Oxidation)	0	0	0.016	0.07399	2.43724	2	1034.48	-0.942945	54.726	0	C1203	81.48	A6802	0.0196
Medium	KQGEGFSVY	2	1	1	Q09019		0	3.37627e+06	0.016	0.0755	2.41828	2	1014.49	-0.901461	51.5599	0	C1203	44.44	B1503	0.0037
Medium	EVINESNSV	3	1	1	Q9BXT5		0	1.15556e+06	0.016	0.07605	2.37561	2	990.473	-0.377591	46.7874	0	C1203	37.04	A6802	0.0118
Medium	QKAPDGKSY	2	1	1	Q9HBL8		0	0	0.016	0.07481	2.34107	2	993.5	-0.403571	15.0428	0	C1203	51.85	B1503	0.1579
Medium	AASPIITLV	1	1	1	Q8TEM1		0	4.73022e+06	0.016	0.07381	2.33241	2	884.545	-0.181778	88.2509	0	C1203	92.59	C1203	0.0772
Medium	SAAEIYNEV	3	1	1	Q9BVG8		0	4.60682e+06	0.016	0.07313	2.32402	2	995.469	1.05626	61.8684	0	C1203	85.19	A6802	0.0091
Medium	RQNIGVATF	3	1	1	Q9NTJ3		0	2.48674e+06	0.016	0.07519	2.32214	2	1005.55	-1.02817	57.2477	0	C1203	37.04	B1503	0.0018
Medium	VAYGAAVQA	4	6	6	P11021;P34931;P08107;P54652;P17066;P11142		0	2.66391e+06	0.016	0.07435	2.31961	2	849.446	-0.660254	50.1906	0	C1203	51.85	C1203	0.4038
Medium	FSVITVIGAL	3	1	1	Q53R12		0	2457337	0.016	0.07342	2.28096	2	1019.61	-0.636185	80.1581	0	C1203	57.14	A6802	3.8071
Medium	SAFATPFLV	14	1	1	P15954		0	2.63611e+07	0.016	0.07372	2.26289	2	952.513	-0.693017	97.9319	0	C1203	81.48	A6802	0.086
Medium	LQRTPMSAL	1	1	1	Q86X24		0	2.82361e+06	0.016	0.07153	2.22733	2	1016.56	0.351783	48.9457	0	C1203	37.04	B1503	0.1206
Medium	QQQQPQHAF	1	1	1	Q99967		0	1.08405e+06	0.016	0.07219	2.22426	2	1111.53	-0.952053	34.2132	0	C1203	29.63	B1503	0.0137
Medium	FVYENPISL	8	1	1	Q6NTF9		0	3.94369e+06	0.016	0.07381	1.81113	2	1081.56	-0.363761	88.4016	0	C1203	55.56	C1203	0.002
Medium	AAYGRSPmV	3	1	1	Q04726	M8(Oxidation)	0	1.1668e+06	0.016	0.07405	1.72074	2	967.466	-0.342278	38.7199	0	C1203	85.19	C1203	0.0671
Medium	HTmPPQPGm	1	1	1	Q8N114	M3(Oxidation); M9(Oxidation)	0	0	0.016	0.07257	1.5495	2	1027.43	-0.336919	28.0363	0	C1203	66.67	A6802	0.0672
Medium	GKNEVTLEF	8	1	1	Q08945		0	3.69503e+06	0.017	0.07998	2.61547	2	1036.53	-2.18728	64.2658	0	C1203	40.74	B1503	0.0293
Medium	ISIRQmAY	1	1	1	Q96BI3	M6(Oxidation)	0	2.36839e+06	0.017	0.07869	2.5728	2	997.514	0.398305	54.0816	0	C1203	53.33	C1203	2.8739
Medium	YSYPETPLY	1	1	1	P22670		0	810936	0.017	0.07927	2.47499	2	1132.52	-0.880289	75.009	0	C1203	81.48	C1203	0.0069
Medium	ETHNFPTGV	5	1	1	O15067		0	3.15688e+06	0.017	0.08057	2.40324	2	1001.47	-1.81313	50.1503	0	C1203	70.37	A6802	0.0097
Medium	ETNAVHVNV	1	1	1	Q2LD37		0	1.10384e+06	0.017	0.07884	2.38392	2	982.495	-0.605393	45.1399	0	C1203	70.37	A6802	0.0053
Medium	EVSLPSVEV	3	1	1	Q8IVF2		0	1.26173e+06	0.017	0.08092	2.30165	2	958.509	-0.698809	80.0469	0	C1203	48.15	A6802	0.0094
Medium	KQADPFASL	7	1	1	Q5SR56		0	4.09752e+06	0.017	0.07968	2.29603	2	976.508	-1.80957	64.4585	0	C1203	44.44	B1503	0.0148
Medium	RSLQENIAY	3	1	1	Q03518		0	3.05445e+06	0.017	0.0789	2.25391	2	1093.56	-0.590199	51.0119	0	C1203	70.37	B1503	0.1512
Medium	STYIKKIGY	1	2	2	P68104;Q5VTE0		0	1.84996e+06	0.017	0.07677	2.21378	2	1072.6	-0.962676	45.4915	0	C1203	74.07	C1203	0.3439
Medium	STIGQAFEL	6	2	2	P29353;Q6S5L8		0	3.92591e+06	0.017	0.08091	2.19784	2	965.493	-0.567138	83.2156	0	C1203	74.07	A6802	0.0363
Medium	NAFHHPSAV	1	1	1	P32314		0	1.12617e+06	0.017	0.07682	2.19404	2	979.474	-0.807463	33.8824	0	C1203	81.48	A6802	0.0977
Medium	ESSPTVALL	2	1	1	Q6P2E9		0	1.39209e+06	0.017	0.08086	2.18714	2	916.498	-0.18616	76.946	0	C1203	81.48	A6802	0.0522
Medium	KAFGSTIVI	2	1	1	Q13620		0	2.33575e+06	0.017	0.07712	1.97111	2	935.556	-0.601508	67.3417	0	C1203	81.48	C1203	0.0218
Medium	YVASNQHEV	4	1	1	Q13127		0	1.18867e+06	0.017	0.08079	1.90261	2	1046.49	-0.47748	30.7803	0	C1203	51.85	A6802	0.0175
Medium	QSFPEPLII	4	1	1	Q9NRL2		0	4.68593e+06	0.017	0.07776	1.85657	2	1043.58	-0.141182	96.5216	0	C1203	77.78	C1203	0.351
Medium	VSFPLSSIV	1	1	1	Q5SQN1		0	6.19699e+06	0.017	0.08071	1.84107	2	948.54	-0.272819	100.989	0	C1203	81.48	C1203	0.2883
Medium	ITFPGIKLI	2	1	1	O75387		0	558062	0.017	0.07699	1.70487	2	1001.64	0.0205619	91.6798	0	C1203	77.78	C1203	0.1062
Medium	AKGPGLFF	5	2	2	Q9NP85;P27105		0	6.21228e+06	0.018	0.08175	2.52705	2	836.467	0.277523	72.1478	0	C1203	33.33	B1503	1.9107
Medium	EVTLIHSQV	1	1	1	Q9BRQ8		0	2467232	0.018	0.08287	2.45432	2	1025.56	-0.786031	56.3305	0	C1203	37.04	A6802	0.0563
Medium	GQDKPHETY	1	1	1	Q12789		0	381534	0.018	0.08426	2.40799	2	1074.48	-0.963171	15.3257	0	C1203	40.74	B1503	0.049
Medium	KKIPSTVEF	1	1	1	Q9H2G9		0	2.71018e+06	0.018	0.08619	2.37567	2	1048.6	-0.547669	48.6403	0	C1203	44.44	B1503	0.0044
Medium	DASEIQVQV	5	1	1	P18858		0	3.82724e+06	0.018	0.08578	2.34617	2	988.496	1.23913	67.0779	0	C1203	85.19	A6802	0.0625
Medium	TTFGSRVNV	2	1	1	Q9P265		0	3.33566e+06	0.018	0.08174	2.33418	2	980.514	-2.33737	49.6354	0	C1203	77.78	A6802	0.0068
Medium	FTSSRHTVV	6	1	1	Q9NZ01		0	5.76045e+06	0.018	0.0854	2.28104	2	1033.54	-0.376805	32.3164	0	C1203	81.48	C1203	0.2567
Medium	TTAEVVVTEI	1	1	1	P10809		0	979168	0.018	0.08606	2.22597	2	1061.57	-0.550398	74.5295	0	C1203	28.57	A6802	0.0673
Medium	RKLDQVSQF	2	1	1	O60502		0	6.2138e+06	0.018	0.08142	2.21851	2	1120.61	-0.30162	44.4249	0	C1203	37.04	B1503	0.0086
Medium	ETYLNISQV	2	1	1	O94768		0	1.42534e+06	0.018	0.08381	2.19089	2	1066.54	0.124023	76.3465	0	C1203	74.07	A6802	0.014
Medium	NKAAAGSAY	1	1	1	Q9UJJ7		0	211070	0.018	0.08609	2.15253	2	852.421	-0.0401546	21.3169	0	C1203	40.74	B1503	0.151
Medium	DVAQIIIRI	2	1	1	Q7L622		0	1.32356e+06	0.018	0.08178	2.10562	2	1040.65	-0.843668	87.7946	0	C1203	40.74	A6802	0.0471
Medium	ETFMNRVEV	2	1	1	Q9UBU8		0	1.09535e+06	0.018	0.08624	2.10317	2	1124.54	-0.395396	63.3183	0	C1203	77.78	A6802	0.0169
Medium	DVFHMVVEV	1	1	1	Q15181		0	2.25241e+06	0.018	0.08282	1.9991	2	1074.53	-0.496393	89.41	0	C1203	51.85	A6802	0.043
Medium	TVSDVLNSV	2	1	1	Q14746		0	1.71879e+06	0.018	0.08206	1.97685	2	933.489	-0.0377135	71.4621	0	C1203	44.44	A6802	0.004
Medium	EVTPPVLSV	1	1	1	Q6PJG2		0	1.51216e+06	0.018	0.084	1.91763	2	940.535	-0.325062	79.0302	0	C1203	51.85	A6802	0.0059
Medium	ETSKYYVTI	7	2	2	P68104;Q5VTE0		0	1.02291e+07	0.018	0.08453	1.87783	2	1103.56	-0.87953	61.3053	0	C1203	70.37	A6802	0.063
Medium	GAARAGPGLSY	3	1	1	Q7Z7M0		0	1.17763e+06	0.019	0.09136	2.8896	2	1019.53	-0.915876	46.0269	0		0	B1503	0.9814
Medium	KSIARVLTV	3	1	1	P42766		0	1.91614e+06	0.019	0.08977	2.65995	2	986.635	-0.940648	50.5757	0	C1203	77.78	C1203	0.1113
Medium	RKVPGVTAI	8	3	3	Q06787;P51114;P51116		0	5.7933e+06	0.019	0.09066	2.55482	2	940.594	-0.348548	43.7788	0	C1203	40.74	B1503	0.0813
Medium	SKFAGGLHF	1	1	1	Q09666		0	2.02277e+06	0.019	0.09112	2.50617	2	963.504	-0.60648	56.3718	0	C1203	37.04	B1503	0.003
Medium	DTFRGVAFV	10	1	1	O15067		0	2.6557e+07	0.019	0.09126	2.34031	2	1011.53	-0.599275	74.9427	0	C1203	74.07	A6802	0.0107
Medium	EVSRISEVL	1	1	1	Q07065		0	3.05452e+06	0.019	0.08798	2.19762	2	1031.57	-2.04424	61.2884	0	C1203	44.44	A6802	0.1187
Medium	SASRVVQVV	3	1	1	P82909		0	3.13585e+06	0.019	0.0889	2.17616	2	944.552	-0.437015	46.1503	0	C1203	85.19	C1203	0.5875
Medium	LVKEPSTPA	1	1	1	P30530		0	910551	0.019	0.09195	2.15857	2	941.53	0.11765	37.7818	0	C1203	3.7	A6802	1.8286
Medium	FVEWIPNNV	4	8	8	Q9H4B7;Q13885;Q9BVA1;Q13509;P04350;P68371;P07437;Q9BUF5		0	2.60087e+06	0.019	0.0903	2.1249	2	1117.57	-0.260287	89.1687	0	C1203	44.44	A6802	0.1248
Medium	IASPVIAAV	4	1	1	Q6ZMZ0		0	3.69372e+06	0.019	0.09136	2.09145	2	840.519	-0.160464	74.7613	0	C1203	88.89	C1203	0.0227
Medium	YAKNNIPII	2	1	1	P46977		0	2.69396e+06	0.019	0.09299	2.00589	2	1045.6	-1.55576	64.4654	0	C1203	74.07	C1203	0.0828
Medium	IKVIPTLAL	1	1	1	O14530		0	350572	0.019	0.08834	1.90555	2	967.655	-0.193778	83.2729	0	C1203	40.74	B1503	0.288
Medium	AKGPVSKY	1	1	1	P07339		0	194651	0.019	0.08925	1.85107	2	849.483	-0.0171636	21.0765	0	C1203	36.67	B1503	1.1575
Medium	EANDIVFSV	2	1	1	Q5T9L3		0	1.86576e+06	0.019	0.0872	1.81763	2	993.488	-0.414113	81.4691	0	C1203	81.48	A6802	0.0044
Medium	EVSKAIINI	3	1	1	Q9NXP7		0	8.86365e+06	0.019	0.09091	1.81454	2	986.586	-1.67032	64.6055	0	C1203	40.74	A6802	0.0225
Medium	ETSDILHRm	1	1	1	Q9UHD2	M9(Oxidation)	0	509079	0.019	0.09267	1.75849	2	1117.53	-0.763778	35.4528	0	C1203	66.67	A6802	0.0312
Medium	LAFEGPILL	3	1	1	O60281		0	252309	0.019	0.0918	1.41722	2	972.576	-0.0387482	103.428	0	C1203	88.89	C1203	0.0088
Medium	VASSRSSVL	1	1	1	Q9UPY3		0	659516	0.02	0.09746	2.54649	2	905.505	-0.199766	36.5074	0	C1203	88.89	C1203	0.1667
Medium	EVVQINEQV	1	1	1	Q969H4		0	0	0.02	0.09736	2.52028	2	1057.55	-1.31276	62.3704	0	C1203	37.04	A6802	0.0153
Medium	FSSGAIQVV	2	1	1	O75643		0	1.83489e+06	0.02	0.09545	2.42111	2	907.488	-0.348866	70.234	0	C1203	85.19	C1203	0.2378
Medium	TKFGGIVVL	2	1	1	O15118		0	525619	0.02	0.09565	2.41073	2	933.577	-0.263091	77.3176	0	C1203	55.56	B1503	0.0965
Medium	GKGNFGEVY	5	1	1	P16591		0	3.48542e+06	0.02	0.09454	2.39129	2	970.463	-0.349614	47.1822	0	C1203	40.74	B1503	0.2403
Medium	KKFPGSAAL	2	1	1	Q9BTC0		0	2.67632e+06	0.02	0.09372	2.36983	2	918.54	-0.623346	41.4299	0	C1203	48.15	B1503	0.0231
Medium	FQRGNDVAF	4	1	1	P17931		0	2.77322e+06	0.02	0.09621	2.33029	2	1053.51	-0.457056	51.2235	0	C1203	40.74	B1503	0.0058
Medium	RQLPSSHAL	2	1	1	Q8WV83		0	4.8047e+06	0.02	0.0942	2.31357	2	1008.56	-0.384938	36.2514	0	C1203	44.44	B1503	0.015
Medium	AQFEAAVAF	1	1	1	Q8N1F7		0	833988	0.02	0.09374	2.31288	2	953.472	-0.316309	80.1734	0	C1203	44.44	B1503	0.0013
Medium	EVPFFPARV	1	1	1	P48200		0	2.39218e+06	0.02	0.09564	2.28247	2	1061.58	0.370551	78.5796	0	C1203	40.74	A6802	0.0212
Medium	LHGPSGSAF	2	1	1	P26006		0	1.85855e+06	0.02	0.09591	2.17357	2	872.426	-0.0668373	45.7037	0	C1203	37.04	B1503	0.3147
Medium	QAFRVAAL	3	1	1	P0CW18		0	1.89669e+06	0.02	0.09753	2.06156	2	875.51	-0.13723	62.1858	0	C1203	73.33	C1203	1.8377
Medium	mAFDPTSTLL	2	1	1	Q12788	M1(Oxidation)	0	455226	0.02	0.09612	1.75148	2	1111.53	-0.715747	85.8165	0	C1203	80	A6802	0.1257
Medium	KQFKSEAY	2	1	1	Q03001		0	1.01353e+06	0.02	0.09437	1.65212	2	1000.51	-0.343077	25.9286	0	C1203	33.33	B1503	0.0268
Medium	VSYKGSISY	1	1	1	Q6SPF0		0	1.77217e+06	0.021	0.1033	2.86889	2	1003.51	-2.42615	49.656	0	C1203	77.78	C1203	0.0184
Medium	AARPATSTL	4	1	1	Q04637		0	7.56102e+06	0.021	0.1026	2.82477	2	887.494	-0.134013	34.7239	0	C1203	88.89	C1203	0.0128
Medium	ENAGIFYEA	3	1	1	Q5VT52		0	4.95702e+06	0.021	0.1031	2.40525	2	1013.46	-0.286525	71.0068	0	C1203	11.11	A6802	0.647
Medium	GKAFSNRSY	1	1	1	Q9Y2P0		0	484331	0.021	0.1015	2.08763	2	1029.51	-0.0925709	28.5809	0	C1203	44.44	B1503	0.0599
Medium	YAFLREAL	2	1	1	Q15048		0	1.09907e+06	0.021	0.1022	2.08607	2	982.536	0.0731425	72.6335	0	C1203	83.33	C1203	0.5827
Medium	ETITGQHPA	2	1	1	Q8WTW3		0	1.10551e+06	0.021	0.102	2.05914	2	953.468	-0.560116	29.7883	0	C1203	29.63	A6802	0.1236
Medium	RVNEPSIL	2	1	1	O14791		0	3.00325e+06	0.021	0.1051	1.98033	2	927.526	-0.313744	54.6635	0	C1203	43.33	C1203	1.9572
Medium	HQYPGRGVY	1	1	1	Q9H3P7		0	769023	0.021	0.1018	1.75661	2	1076.53	-0.522396	35.4744	0	C1203	51.85	B1503	0.0011
Medium	GKSLTTSQY	2	1	1	Q9NZB2		0	1540225	0.022	0.111	2.74507	2	984.499	-0.36173	34.8408	0	C1203	40.74	B1503	0.1605
Medium	QETLDVGSF	1	1	1	Q6J272		0	4.60682e+06	0.022	0.1084	2.698	2	995.469	1.16884	61.9534	0	C1203	33.33	B1503	1.0161
Medium	AKRGELSKY	1	1	1	Q9ULC5		0	1.97588e+06	0.022	0.1057	2.68739	2	1051.59	-1.26374	39.7576	0	C1203	44.44	B1503	0.0653
Medium	IQHPSNVL	3	1	1	P14866		0	6.16138e+06	0.022	0.1083	2.55254	2	907.499	-0.337326	45.3932	0	C1203	40	B1503	0.9671
Medium	EVYRGKLIEA	1	1	1	P62318		0	1.28159e+06	0.022	0.1087	2.48509	2	1177.66	-0.174133	46.8027	0	C1203	8.57	A6802	0.3445
Medium	LKVKGNVF	2	1	1	P84098		0	1.8007e+06	0.022	0.111	2.36425	2	904.562	-0.00143595	45.601	0	C1203	33.33	B1503	1.1998
Medium	KAFLNAIm	2	2	2	Q14839;Q8TDI0	M8(Oxidation)	0	3.16616e+06	0.022	0.1085	2.33177	2	923.502	-0.150169	58.7427	0	C1203	83.33	C1203	2.0118
Medium	STFDHPELV	1	1	1	P78371		0	912361	0.022	0.1112	2.30141	2	1044.5	-0.827578	61.3778	0	C1203	77.78	A6802	0.0068
Medium	GKIIKPLQY	4	1	1	Q13823		0	3.26251e+06	0.022	0.1111	2.26633	2	1059.65	-2.26223	49.9574	0	C1203	44.44	B1503	0.1046
Medium	GAYKYIQEL	1	1	1	P61313		0	2.10538e+06	0.022	0.111	2.23747	2	1084.57	-1.17435	64.6063	0	C1203	85.19	C1203	0.0446
Medium	KASSITREL	1	1	1	P30622		0	1.01406e+06	0.022	0.1104	2.05877	2	1004.57	-0.604958	36.3134	0	C1203	88.89	C1203	0.0921
Medium	DISDVAFLV	1	1	1	Q9H2P9		0	384285	0.022	0.1086	1.96942	2	978.514	-0.584382	102.627	0	C1203	44.44	A6802	0.0343
Medium	FSQPEIVPI	1	1	1	P42081		0	4.14428e+06	0.022	0.1099	1.96809	2	1029.56	-0.355952	97.4496	0	C1203	77.78	C1203	0.4287
Medium	FIPLPFAEA	2	1	1	Q9C0D2		0	611485	0.022	0.1078	1.93295	2	1004.54	-2.05355	101.396	0	C1203	7.41	A6802	0.2928
Medium	IAFPAAPLL	2	1	1	Q4ZIN3		0	160231	0.022	0.1113	1.77107	2	912.555	-0.563397	101.031	0	C1203	85.19	C1203	0.0088
Medium	YTFPQILGV	1	1	1	Q8N8U2		0	712859	0.022	0.1071	1.68492	2	1037.57	-1.35717	101.214	0	C1203	88.89	A6802	0.0042
Medium	GQISPLLAV	1	1	1	Q12887		0	518090	0.023	0.1154	2.5761	2	897.541	0.0808959	86.4577	0	C1203	44.44	B1503	0.4309
Medium	YKAPILLAL	1	1	1	O60341		0	226255	0.023	0.1145	2.56872	2	1001.64	-1.00535	86.78	0	C1203	55.56	B1503	0.1787
Medium	AQAESLRY	2	1	1	P23396		0	1.02301e+06	0.023	0.1161	2.41519	2	937.473	-0.780012	41.2641	0	C1203	26.67	B1503	0.1456
Medium	KAYANPTVV	2	1	1	Q86XK2		0	1.17365e+07	0.023	0.1166	2.22379	2	962.53	-0.407607	44.1387	0	C1203	85.19	C1203	0.0129
Medium	VmINKATPY	1	1	1	O95167	M2(Oxidation)	0	1.29899e+06	0.023	0.1163	2.19289	2	1052.54	-0.748215	46.5664	0	C1203	40.74	B1503	0.1499
Medium	HQSPSSSSY	1	1	1	O43298		0	452911	0.023	0.1147	2.11463	2	979.411	-0.274469	23.7938	0	C1203	48.15	B1503	0.0043
Medium	EISGIVEVV	2	1	1	P35244		0	3.22078e+06	0.023	0.1129	2.11142	2	944.53	-0.438018	81.4128	0	C1203	51.85	A6802	0.0219
Medium	SKPRNVPAAY	1	1	1	P20645		0	810194	0.023	0.1167	2.01486	2	1102.6	-0.684134	31.9682	0	C1203	34.29	B1503	0.3973
Medium	ELPAILQQV	2	1	1	Q4ZIN3		0	461166	0.023	0.1118	1.92351	2	1010.59	-0.543532	90.0494	0	C1203	37.04	A6802	0.0841
Medium	RKEETVTVY	2	1	1	Q9BZX2		0	5.04957e+06	0.024	0.1187	2.49505	2	1124.59	-0.433481	36.9354	0	C1203	48.15	B1503	0.0125
Medium	GKRPFGVSL	2	1	1	P25789		0	1.16155e+07	0.024	0.1207	2.48167	2	960.562	-0.416331	53.5802	0	C1203	48.15	B1503	0.2282
Medium	GKAFNGKAY	1	1	1	Q3ZCT1		0	454409	0.024	0.12	2.43467	2	955.499	-0.139213	28.1869	0	C1203	44.44	B1503	0.0941
Medium	YRGEALEDF	1	1	1	Q5JRA6		0	5.92954e+07	0.024	0.1193	1.66703	2	1099.51	-0.195249	65.7178	0	C1203	37.04	B1503	1.2044
Medium	QVSEVFNTV	1	1	1	Q9H0T7		0	1.55508e+06	0.025	0.1266	2.52535	2	1022.51	-0.690747	68.9818	0	C1203	48.15	A6802	0.0074
Medium	EQYEQILAF	3	2	2	Q2VIR3;P41091		0	2.31573e+06	0.025	0.1253	2.46924	2	1140.56	-0.877955	89.947	0	C1203	44.44	B1503	0.007
Medium	TTTAEKNGI	1	1	1	Q14624		0	784034	0.025	0.1259	2.25161	2	934.488	3.93499	82.6931	0	C1203	59.26	A6802	0.7576
Medium	FTTHILEVI	2	1	1	P15927		0	8.81143e+06	0.025	0.1245	2.24857	2	1072.6	-0.639899	82.5346	0	C1203	66.67	A6802	0.3783
Medium	GQTKQVTVY	1	1	1	Q9ULG1		0	842062	0.025	0.1258	2.24791	2	1023.55	-0.395597	37.6516	0	C1203	44.44	B1503	0.013
Medium	YPIAEVEQL	1	1	1	Q86WA8		0	0	0.025	0.1233	2.20781	2	1061.55	2.22997	89.1019	0	C1203	44.44	C1203	0.975
Medium	LGYERITTF	1	1	1	Q9NRJ4		0	1.02658e+06	0.025	0.1238	2.19742	2	1099.58	-0.866873	65.766	0	C1203	44.44	C1203	0.0096
Medium	FQNLPLNIY	1	1	1	Q9Y225		0	618046	0.025	0.1239	2.03918	2	1121.6	-0.286099	80.0198	0	C1203	40.74	B1503	0.0229
Medium	FSSDVTHEm	1	1	1	Q9H8X2	M9(Oxidation)	0	521938	0.025	0.1258	2.01163	2	1068.43	-0.182502	38.0904	0	C1203	74.07	C1203	0.0142
Medium	DTHHLVNYI	1	1	1	Q01581		0	2.33865e+06	0.025	0.1245	2.00165	2	1111.55	-0.726558	57.0954	0	C1203	62.96	A6802	0.1144
Medium	GKSDPFLVF	1	3	3	Q9HCH3;Q86YQ8;Q8IYJ1		0	1.84589e+06	0.025	0.124	1.93126	2	1009.53	-0.700093	83.3097	0	C1203	44.44	B1503	0.0196
Medium	QALVGAEKRm	1	1	1	P12524	M10(Oxidation)	0	1.01313e+06	0.025	0.1249	1.68503	2	1118.6	-0.477535	33.3773	0	C1203	57.14	C1203	18.2209
Medium	QSVHFQTIF	1	1	1	P54136		0	1.15308e+06	0.026	0.1291	2.51305	2	1106.56	-0.585454	73.9638	0	C1203	59.26	C1203	1.2338
Medium	CAYVRmVFL	1	1	1	Q9H553	M6(Oxidation)	0	2.04914e+06	0.026	0.1283	2.38961	2	1117.55	-0.277558	102.376	0	C1203	81.48	C1203	3.0928
Medium	VKSQISVY	4	1	1	Q9H8H0		0	1.23595e+06	0.026	0.1271	2.38095	2	923.52	-0.177025	46.3313	0	C1203	40	B1503	0.6481
Medium	DTPDINIVL	1	1	1	P30414		0	565892	0.026	0.1282	2.35261	2	999.535	-0.425579	92.3906	0	C1203	77.78	A6802	0.1528
Medium	ATSYVSQSI	1	1	1	Q7Z745		0	2.22645e+06	0.026	0.1306	2.3466	2	955.473	0.0102513	61.8597	0	C1203	66.67	A6802	0.3696
Medium	AQRPTEQEL	3	1	1	Q9ULW3		0	1.53245e+06	0.026	0.1313	2.33984	2	1071.54	-0.746068	37.0057	0	C1203	51.85	B1503	0.0976
Medium	FQKSGASVV	4	1	1	Q5SSJ5		0	2.42442e+06	0.026	0.1321	2.29437	2	922.499	-0.0511201	38.2264	0	C1203	48.15	B1503	0.58
Medium	GKREGIDQSY	1	1	1	O94952		0	740143	0.026	0.1268	2.23688	2	1152.56	-0.248825	31.3131	0	C1203	40	B1503	0.245
Medium	KAVGHPFVI	6	1	1	O14980		0	1.10648e+07	0.026	0.1273	2.20703	2	967.571	-1.36298	52.3122	0	C1203	77.78	C1203	0.1068
Medium	IKKDVDEAY	3	1	1	P05787		0	922190	0.026	0.1297	2.04558	2	1080.56	-0.48408	31.7571	0	C1203	40.74	B1503	0.1024
Medium	ALYNETESL	1	1	1	Q86XP1		0	4.604e+06	0.026	0.1306	1.95055	2	1039.49	0.0471326	78.9951	0	C1203	44.44	C1203	0.6392
Medium	ETFGQYPLQV	1	1	1	Q96RU2		0	682849	0.026	0.1316	1.94551	2	1181.58	-0.692257	83.3204	0	C1203	60	A6802	0.0475
Medium	DVFSPSHAI	2	1	1	Q8WU67		0	1.53486e+06	0.026	0.1282	1.90359	2	972.478	-0.688409	62.7858	0	C1203	37.04	A6802	0.016
Medium	ITDSAQAMVL	1	1	1	P39060		0	942031	0.026	0.1295	1.76606	2	1048.53	0.318795	92.9893	0	C1203	51.43	A6802	5.1854
Medium	QVIKPPLIFV	4	1	1	Q13428		0	2.00822e+06	0.026	0.1278	1.69627	2	1153.73	-0.193148	89.2954	0	C1203	28.57	A6802	0.152
Medium	SAVGHVFSL	2	1	1	Q69YN4		0	1.95373e+06	0.027	0.1331	2.91933	2	916.489	-0.106139	67.7249	0	C1203	81.48	C1203	0.0113
Medium	YSSPVNSSA	1	1	1	O14964		0	1.50658e+06	0.027	0.1329	2.629	2	911.41	-0.415276	40.4226	0	C1203	44.44	A6802	0.2884
Medium	KKGGPGVAL	2	1	1	P08047		0	2.14848e+06	0.027	0.134	2.40103	2	826.515	0.00322552	31.9113	0	C1203	44.44	B1503	0.4614
Medium	KAYHEQLSV	3	6	6	Q71U36;P68363;Q13748;Q6PEY2;P68366;Q9NY65		0	2.29484e+06	0.027	0.1362	2.32262	2	1074.56	-0.0692782	39.0697	0	C1203	81.48	C1203	0.1001
Medium	GKTVQIPVY	3	1	1	Q9BZX2		0	942248	0.027	0.1383	2.04504	2	1004.58	-0.829747	60.3952	0	C1203	44.44	B1503	0.2291
Medium	AAIDHQIEV	2	1	1	Q9Y485		0	5.36787e+06	0.027	0.1339	2.03914	2	995.515	-0.315291	52.4018	0	C1203	88.89	C1203	0.0259
Medium	KSKEMEEQI	1	1	1	Q96CN4		0	1.47612e+06	0.027	0.1377	2.01594	2	1121.55	-1.3547	40.7529	0	C1203	62.96	C1203	5.4857
Medium	mAQAPAQSQF	1	1	1	Q92793	M1(Oxidation)	0	3.18438e+06	0.027	0.1342	1.93172	2	1094.49	0.00143645	91.4455	0	C1203	62.86	B1503	0.091
Medium	GQTGTGKTY	1	3	3	O15066;O14782;Q96AC6		0	177324	0.027	0.1374	1.84715	2	912.442	-0.373986	19.8924	0	C1203	48.15	B1503	0.0206
Medium	VAYPLYILY	1	1	1	Q99567		0	290720	0.027	0.1348	1.81289	2	1114.62	-0.426917	103.092	0	C1203	92.59	C1203	0.0295
Medium	ETSPHTFQL	1	1	1	Q69YN4		0	1.11758e+07	0.027	0.1385	1.68213	2	1059.51	-0.379293	58.0802	0	C1203	77.78	A6802	0.0155
Medium	EAAPGALGQV	1	1	1	Q8WYQ5		0	1.83836e+06	0.028	0.1439	2.86723	2	912.479	-0.0866995	58.2212	0	C1203	60	A6802	0.1892
Medium	GAYGEPRVK	3	1	1	Q15392		0	2.35487e+06	0.028	0.1445	2.43442	2	976.521	-0.246501	28.8069	0	C1203	55.56	C1203	5.8378
Medium	SLAEVLQQL	1	1	1	Q6NUM9		0	7.38423e+06	0.028	0.1425	2.28373	2	1000.57	0.415087	65.7671	0	C1203	44.44	C1203	0.3628
Medium	EAVSVIQSI	6	1	1	Q9P035		0	8.74021e+06	0.028	0.1421	2.27659	2	945.524	-0.7611	75.2625	0	C1203	74.07	A6802	0.0782
Medium	DQDLNKIL	1	1	1	Q659C4		0	2.02596e+06	0.028	0.1422	2.25238	2	958.52	-0.1889	74.2501	0	C1203	50	B1503	24.9583
Medium	EIAAVIETV	2	1	1	Q7Z4G1		0	1.77773e+07	0.028	0.1448	1.97411	2	944.529	-0.954975	77.9606	0	C1203	48.15	A6802	0.0047
Medium	AHSPASLSF	1	1	1	Q9UKK3		0	2.66591e+06	0.029	0.1474	2.39944	2	916.452	-0.424904	56.0539	0	C1203	48.15	B1503	0.0424
Medium	GQRPTQPVY	4	1	1	Q9H0W8		0	6.76568e+06	0.029	0.1463	2.07733	2	1045.54	-0.37248	38.3183	0	C1203	48.15	B1503	0.0039
Medium	MQNIDmPELF	1	1	1	Q9NY74	M6(Oxidation)	0	5.84087e+06	0.03	0.152	2.41748	2	1253.55	-2.54906	73.9929	0	C1203	34.29	B1503	0.5592
Medium	NAMDVVVQF	1	1	1	O95870		0	461957	0.03	0.1506	2.34584	2	1022.5	-0.472753	87.4577	0	C1203	77.78	C1203	0.0706
Medium	AKYKNQVVY	1	1	1	Q9NVR2		0	939235	0.03	0.1511	2.32715	2	1112.61	-0.530978	34.7421	0	C1203	51.85	B1503	0.0038
Medium	TVFPAGLANV	1	1	1	Q8IZ83		0	415406	0.03	0.1522	2.32689	2	988.546	-0.380659	85.1137	0	C1203	34.29	A6802	0.0394
Medium	SGFSQPVIF	2	1	1	P98082		0	3.68371e+06	0.03	0.1531	2.0737	2	981.504	-0.534585	86.6616	0	C1203	44.44	C1203	0.3397
Medium	TVTTVILEV	1	1	1	Q9UKF6		0	1.17999e+07	0.03	0.1531	2.05484	2	974.576	-0.616464	86.43	0	C1203	48.15	A6802	0.0526
Medium	ELSPVRAEL	3	1	1	Q9BTE3		0	5.91009e+06	0.03	0.1518	2.00091	2	1013.56	-0.39354	60.0954	0	C1203	51.85	A6802	0.1277
Medium	ETIGVVHLV	2	1	1	Q63HN8		0	1.82718e+07	0.03	0.1513	1.79088	2	966.562	-0.215396	70.7524	0	C1203	74.07	A6802	0.002
Medium	ESAFFQSGV	2	1	1	Q969Y0		0	1.04217e+06	0.031	0.1559	2.71875	2	971.447	-0.423629	72.3436	0	C1203	70.37	A6802	0.0265
Medium	ARAGVVLEm	1	1	1	Q9UKP3	M9(Oxidation)	0	971908	0.031	0.1548	2.44537	2	961.514	-0.0623306	44.3812	0	C1203	51.85	B1503	0.1346
Medium	EAFYTTDRV	1	2	2	Q13547;Q92769		0	477008	0.031	0.159	2.22394	2	1101.52	-0.873429	53.9041	0	C1203	77.78	A6802	0.0516
Medium	HKVANTSSF	2	1	1	O43683		0	1.03119e+06	0.031	0.1601	2.03522	2	990.5	-0.368235	28.8911	0	C1203	29.63	B1503	0.0176
Medium	EAAPVSGYRA	1	1	1	Q96RG2		0	664488	0.031	0.1573	1.92915	2	1020.51	-0.258286	40.2463	0	C1203	34.29	A6802	0.4393
Medium	GQTGSGKTF	2	3	3	Q9NS87;Q6ZMV9;Q9BW19		0	309600	0.031	0.1546	1.86853	2	882.432	0.294673	25.104	0	C1203	40.74	B1503	0.0231
Medium	RKPPSSLGm	2	1	1	Q9H7N4	M9(Oxidation)	0	539374	0.031	0.1543	1.40044	2	988.524	-0.2719	26.7234	0	C1203	40.74	B1503	0.7545
Medium	ESSKVVKKV	1	1	1	Q2NL82		0	946300	0.031	0.1554	1.16743	2	1003.61	-0.547017	18.2323	0	C1203	77.78	A6802	0.4964
Medium	QHASPAGTY	1	2	2	P05187;P09923		0	624899	0.032	0.1606	2.5867	2	931.427	-0.169588	29.5823	0	C1203	48.15	B1503	0.2549
Medium	KKNPSSPLY	1	1	1	O95478		0	1.25462e+06	0.032	0.1636	2.53702	2	1033.57	-0.734515	33.4674	0	C1203	44.44	B1503	0.0148
Medium	ETHFGFETV	4	1	1	Q5HYK3		0	1.0537e+07	0.032	0.1648	2.31299	2	1066.48	-0.901538	66.4988	0	C1203	70.37	A6802	0.0144
Medium	EVFPTQHVV	1	1	1	Q9HCG7		0	2.13598e+06	0.032	0.1649	1.51333	2	1055.55	-0.820652	58.7146	0	C1203	51.85	A6802	0.0087
Medium	KAFQNPSTV	1	1	1	Q8NI77		0	722202	0.033	0.1707	2.48025	2	991.521	-0.20765	40.7593	0	C1203	85.19	C1203	0.0183
Medium	HKAKIEQY	1	1	1	Q8IVG5		0	2.20524e+06	0.033	0.1706	2.23806	2	1016.55	-0.386388	38.095	0	C1203	30	B1503	1.6682
Medium	HQYTGSAL	1	1	1	Q8IWV8		0	2.81948e+06	0.033	0.1656	2.14356	2	876.421	-0.155518	36.2675	0	C1203	36.67	B1503	0.4372
Medium	NSSDVLVYV	1	1	1	Q86VI4		0	1.73023e+06	0.033	0.1658	1.89149	2	995.504	-0.479608	79.6127	0	C1203	77.78	A6802	0.0067
Medium	KKVETNmAF	1	1	1	P05155	M7(Oxidation)	0	517073	0.033	0.1657	1.49897	2	1083.55	-0.474379	33.5392	0	C1203	33.33	B1503	0.0061
Medium	KKDMSPQKF	1	1	1	Q96SW2		0	0	0.033	0.1692	1.30717	2	1108.58	-0.0401608	31.1708	0	C1203	33.33	B1503	0.181
Medium	FSYGRALQA	1	3	3	P04075;P05062;P09972		0	1.07363e+06	0.034	0.176	2.68829	2	1012.52	-0.890945	54.7625	0	C1203	44.44	C1203	0.1662
Medium	EIAAITHGA	1	2	2	Q7L7X3;Q9H2K8		0	574699	0.034	0.1732	2.57145	2	882.468	-0.065944	43.1587	0	C1203	3.7	A6802	0.0217
Medium	IASLKAEV	1	1	1	Q8IUN9		0	1.63073e+06	0.034	0.1729	2.34828	2	830.498	-0.0298085	44.8095	0	C1203	76.67	C1203	9.2562
Medium	SEAKSPGPF	1	1	1	Q9NZ71		0	2.14247e+06	0.034	0.1755	2.24911	2	919.452	-0.0091024	63.8315	0	C1203	37.04	B1503	0.2783
Medium	YVTPVNRNV	1	1	1	P62993		0	795924	0.034	0.1728	2.18864	2	1061.57	-1.21889	44.8524	0	C1203	51.85	A6802	0.0383
Medium	RAYPAAITI	1	1	1	O95071		0	2.83853e+07	0.034	0.1746	2.16699	2	975.562	-0.238855	63.9634	0	C1203	85.19	C1203	0.0033
Medium	EIAKVTEGV	1	1	1	A0AV96		0	912298	0.034	0.1723	2.15952	2	945.525	-0.319815	46.1741	0	C1203	40.74	A6802	0.0058
Medium	DTAHVLFTL	1	1	1	Q6YHU6		0	1.97701e+06	0.034	0.1732	2.00574	2	1016.54	-0.636859	85.27	0	C1203	74.07	A6802	0.0241
Medium	ELSDVLIYL	2	1	1	Q9H773		0	1.62815e+06	0.034	0.1719	1.98901	2	1064.59	-0.335875	106.302	0	C1203	48.15	A6802	0.03
Medium	VAYPEALTL	2	1	1	P48067		0	444623	0.034	0.1747	1.89277	2	976.534	-0.552846	83.8724	0	C1203	96.3	C1203	0.0043
Medium	ETANKIFmV	5	1	1	Q14680	M8(Oxidation)	0	8.49255e+06	0.034	0.1724	1.86729	2	1068.54	-0.333353	63.0958	0	C1203	74.07	A6802	0.005
Medium	AKYSTPATL	1	1	1	Q13206		0	2.65818e+07	0.035	0.1786	2.49243	2	951.514	-0.541889	47.5205	0	C1203	55.56	B1503	0.061
Medium	TGWNLILSY	1	3	3	P30825;P52569;Q8WY07		0	1.66728e+06	0.035	0.1814	2.38924	2	1066.56	-0.563831	84.8309	0	C1203	44.44	C1203	0.738
Medium	YTFDmVFGA	1	1	1	P52732	M5(Oxidation)	0	618349	0.035	0.1821	2.13136	2	1066.45	-0.621684	86.1791	0	C1203	44.44	A6802	0.0186
Medium	SAFEAIIQY	1	1	1	Q96C45		0	955400	0.035	0.1822	2.0838	2	1041.52	-0.79855	86.712	0	C1203	88.89	C1203	0.0079
Medium	RGFGFVTY	2	3	3	Q32P51;P09651;P51991		0	2.0754e+06	0.035	0.1786	1.99911	2	946.478	-0.0912409	70.8612	0	C1203	33.33	B1503	0.7393
Medium	AQFIGPLVF	1	1	1	Q9H2J4		0	198602	0.035	0.1812	1.76081	2	991.561	-0.530266	102.849	0	C1203	48.15	B1503	0.0017
Medium	FKSNVTKTm	1	1	1	Q9Y255	M9(Oxidation)	0	570049	0.035	0.177	1.26377	2	1071.55	-0.698199	28.4701	0	C1203	44.44	B1503	0.1681
Medium	TVSGYEAKV	1	1	1	Q6ZTN6		0	1.24579e+06	0.036	0.187	2.52469	2	953.49	-3.7004	79.6847	0	C1203	44.44	A6802	0.0895
Medium	RIHAHKSPY	2	1	1	Q92610		0	2.54511e+06	0.036	0.1834	2.215	2	1108.6	-1.81732	39.1048	0	C1203	37.04	B1503	1.0349
Medium	KVANIIAEV	1	1	1	P52306		0	1.6507e+06	0.036	0.1859	2.20811	2	956.577	-0.318039	63.8383	0	C1203	48.15	A6802	0.0455
Medium	EAIGNPHHV	2	1	1	Q14146		0	2.46539e+06	0.036	0.1879	2.13289	2	973.485	-0.44746	28.8486	0	C1203	81.48	A6802	0.0442
Medium	mTNDKTAKV	1	1	1	P46013	M1(Oxidation)	0	458568	0.036	0.1875	1.55918	2	1023.51	-0.250926	17.9134	0	C1203	70.37	A6802	0.0173
Medium	SSFPRFYFV	1	1	1	Q14204		0	555062	0.036	0.1867	1.41483	2	1149.57	-0.203498	87.9406	0	C1203	77.78	A6802	0.0816
Medium	FSSPHLLEA	2	1	1	Q96H22		0	1.58154e+06	0.037	0.1897	2.5618	2	1000.51	-1.02412	63.2959	0	C1203	51.85	C1203	0.5981
Medium	KAIVSSGTL	1	1	1	Q03701		0	5.26707e+06	0.037	0.1927	2.32777	2	875.52	-0.139861	47.3935	0	C1203	77.78	C1203	0.2115
Medium	ESFFLGETL	1	1	1	Q9UKM7		0	794146	0.037	0.1908	2.03662	2	1042.51	-1.28651	95.9058	0	C1203	74.07	A6802	0.2242
Medium	AKFKSSIY	1	1	1	Q9Y6V7		0	2.39709e+06	0.037	0.1899	1.99122	2	943.525	-0.263484	38.9725	0	C1203	40	B1503	0.3481
Medium	SKAPVLTY	1	1	1	Q5JVL4		0	708214	0.038	0.1933	2.63124	2	878.498	-0.283321	50.144	0	C1203	30	B1503	0.1149
Medium	QSGLAIAAI	1	1	1	Q8TF66		0	1.31454e+06	0.038	0.194	2.43563	2	843.495	1.98399	58.2447	0	C1203	62.96	A6802	3.1018
Medium	YKIPYTTVL	1	1	1	Q08945		0	1.60729e+06	0.038	0.1956	2.26959	2	1097.62	-0.508868	75.3301	0	C1203	51.85	B1503	0.0536
Medium	EAFYNVITV	1	1	1	Q5JPI3		0	1.83613e+06	0.038	0.1935	2.21506	2	1055.54	-1.27422	89.2885	0	C1203	88.89	A6802	0.032
Medium	NTDSIKTPF	1	1	1	Q5QGS0		0	1.45746e+06	0.038	0.1933	2.1894	2	1022.52	-0.332599	68.879	0	C1203	62.96	C1203	2.0423
Medium	SQFKGYFIF	1	1	1	Q9NY27		0	916896	0.038	0.1932	2.05047	2	1136.58	-0.411177	86.641	0	C1203	33.33	B1503	0.0094
Medium	ISFPAPLYI	2	1	1	P86397		0	1.40099e+06	0.038	0.1988	1.96775	2	1020.58	-0.0771336	103.858	0	C1203	77.78	C1203	0.0251
Medium	QAEWmQMSSL	1	1	1	O43683	M5(Oxidation)	0	404327	0.038	0.1995	1.88126	2	1226.52	-0.275989	84.5628	0	C1203	60	B1503	12.6806
Medium	TPFTGPFISV	1	1	1	Q05DH4		0	705610	0.038	0.199	1.78951	2	1065.56	-0.458486	95.0415	0	C1203	40	A6802	1.3628
Medium	YAVFPFQQV	1	1	1	Q9Y289		0	629388	0.038	0.1964	1.73542	2	1098.56	-0.736004	94.3789	0	C1203	77.78	A6802	0.059
Medium	HVIDLDDATFL	1	1	1	Q8N8R7		0	1.96311e+06	0.038	0.1955	1.69873	2	1258.63	-0.723435	86.7722	0		0	A6802	1.319
Medium	ATIEmYTSI	1	1	1	P48553	M5(Oxidation)	0	6.36254e+06	0.039	0.1997	2.40929	2	1044.49	-4.04971	88.9625	0	C1203	66.67	A6802	0.1103
Medium	ELANLYHHV	1	1	1	Q8TD16		0	1.81554e+06	0.039	0.2047	2.39034	2	1095.56	-1.92909	49.6242	0	C1203	40.74	A6802	0.0562
Medium	HAAKVILQV	1	1	1	Q63HN8		0	2.01154e+06	0.039	0.2032	2.3465	2	978.61	0.585203	49.1989	0	C1203	85.19	A6802	0.0357
Medium	VATDFFTVL	1	1	1	O43299		0	627868	0.039	0.2024	2.28466	2	1012.53	-0.965024	101.517	0	C1203	85.19	C1203	0.0642
Medium	MHILVVHAm	1	1	1	Q8N201	M9(Oxidation)	0	2.16352e+06	0.039	0.2049	2.2366	2	1066.56	2.25171	85.2839	0	C1203	33.33	B1503	0.9245
Medium	GKTKEGVLY	2	1	1	P37840		0	762553	0.039	0.2005	2.21313	2	994.556	-0.676073	33.7817	0	C1203	40.74	B1503	0.3325
Medium	AQVPKSSAL	1	1	1	Q96F05		0	697062	0.039	0.2052	2.15159	2	900.515	-0.215686	38.3968	0	C1203	48.15	B1503	0.0344
Medium	STYQGERAY	1	1	1	Q92900		0	470743	0.039	0.2019	2.08828	2	1074.48	-0.499431	33.3385	0	C1203	74.07	C1203	0.0473
Medium	EILAPLQNI	1	1	1	O00534		0	508602	0.039	0.2004	2.06526	2	1010.59	-0.785116	90.2863	0	C1203	29.63	A6802	0.1107
Medium	KLAVPSLIY	2	1	1	P78381		0	1.45319e+06	0.039	0.2038	1.95834	2	1003.62	-0.40713	78.5019	0	C1203	44.44	B1503	0.1413
Medium	TTTHITKTV	2	2	2	O43491;Q9Y2J2		0	1.16764e+06	0.039	0.203	1.9129	2	1001.56	-0.612062	26.7337	0	C1203	74.07	A6802	0.0595
Medium	VQRVASVm	1	1	1	P25787	M8(Oxidation)	0	345953	0.039	0.2034	1.81481	2	905.487	-0.352506	34.5265	0	C1203	46.67	B1503	1.1815
Medium	EVTVINERL	1	1	1	Q8TCF1		0	1.19015e+06	0.039	0.2004	1.75433	2	1072.6	-1.11221	60.6755	0	C1203	37.04	A6802	0.1349
Medium	KATPLVLKA	1	1	1	O75354		0	1.10925e+06	0.04	0.2095	2.71265	2	940.619	-0.352276	44.3886	0	C1203	51.85	C1203	2.1789
Medium	SVAPSSTNV	2	1	1	P46379		0	1.41559e+06	0.04	0.2123	2.43413	2	861.431	-0.295396	41.6057	0	C1203	48.15	A6802	0.019
Medium	IAVNAVLTV	1	1	1	P48643		0	2.29839e+06	0.04	0.211	2.28457	2	899.555	-1.03268	82.9657	0	C1203	85.19	C1203	0.0444
Medium	HSAAPSPQV	2	1	1	Q92614		0	4.25295e+06	0.04	0.2106	2.21328	2	893.447	-0.106297	34.1923	0	C1203	70.37	A6802	0.0701
Medium	LSLCLVPTF	1	1	1	Q9UHC9		0	892161	0.04	0.2109	2.18539	2	992.548	-0.790097	87.2935	0	C1203	66.67	C1203	3.2597
Medium	QTSSLAVRV	1	1	1	Q6P3W7		0	602691	0.04	0.2065	2.15972	2	960.546	-1.04009	50.1371	0	C1203	77.78	A6802	0.063
Medium	ESNYVNILA	1	1	1	Q9H8V3		0	5.89256e+06	0.04	0.2102	2.11739	2	1022.51	-0.501893	75.596	0	C1203	33.33	A6802	0.2952
Medium	EAVAVIENI	1	1	1	Q9Y2L8		0	1.05109e+06	0.04	0.2108	2.08504	2	957.526	0.449105	76.7856	0	C1203	70.37	A6802	0.0587
Medium	YAYFNFPEL	1	1	1	Q8IY21		0	128058	0.04	0.2082	2.04652	2	1163.54	0.216515	103.42	0	C1203	85.19	C1203	0.0076
Medium	TTTKLVYQI	2	1	1	P26358		0	1.49095e+06	0.04	0.2107	1.91057	2	1066.61	-1.03554	61.9887	0	C1203	62.96	A6802	0.193
Medium	GQKKQVTVY	1	1	1	Q03468		0	879240	0.04	0.2123	1.79346	2	1050.59	-0.31566	28.421	0	C1203	44.44	B1503	0.0093
Medium	DTTVIIWQV	2	1	1	Q9H7D7		0	2.63338e+06	0.04	0.2078	1.56521	2	1074.58	-0.318356	98.8813	0	C1203	70.37	A6802	0.1785
Medium	KAIENIRQm	1	1	1	A6NMZ7	M9(Oxidation)	0	0	0.04	0.2114	1.50463	2	1118.6	-0.141212	31.5178	0	C1203	77.78	C1203	0.0125
Medium	ESASFTVTV	1	1	1	O75147		0	2.09921e+06	0.041	0.2137	2.16285	2	940.462	-0.0377454	70.9072	0	C1203	81.48	A6802	0.0045
Medium	FASDVQFVL	1	1	1	Q02833		0	535253	0.041	0.2172	1.81477	2	1025.53	-0.903754	92.7533	0	C1203	88.89	C1203	0.069
Medium	YAYPGVLLI	1	1	1	Q99798		0	726288	0.041	0.2149	1.64564	2	1008.58	-0.310201	100.839	0	C1203	88.89	C1203	0.0026
Medium	IAKNPETVm	1	1	1	Q99797	M9(Oxidation)	0	117399	0.041	0.2152	1.50087	2	1018.52	0.333998	35.7931	0	C1203	70.37	C1203	0.2124
Medium	KVSILQRQm	1	1	1	P27352	M9(Oxidation)	0	1.40963e+06	0.042	0.2215	2.18431	2	1118.63	-3.63592	41.8417	0	C1203	37.04	C1203	1.1757
Medium	KKEGGTVVY	1	1	1	P49419		0	1.07787e+06	0.042	0.2203	2.18103	2	980.541	-0.473501	28.7015	0	C1203	48.15	B1503	0.0277
Medium	SRQESDTVSY	1	1	1	Q8IWB9		0	1.74339e+06	0.042	0.2228	2.1751	2	1171.52	-0.18338	48.2746	0	C1203	31.43	B1503	0.176
Medium	EVIDKYTAV	1	1	1	O60870		0	2.05745e+06	0.042	0.2242	2.07978	2	1037.55	-1.13036	53.7247	0	C1203	40.74	A6802	0.0043
Medium	TSSRVIQSV	1	1	1	O75061		0	2.1435e+06	0.042	0.2226	2.06875	2	976.542	-0.560882	41.0068	0	C1203	74.07	A6802	0.2615
Medium	ETANQEYKV	1	1	1	Q8WX93		0	1.65907e+06	0.042	0.2245	1.4869	2	1081.52	-0.472274	36.8753	0	C1203	70.37	A6802	0.035
Medium	STYPRPHEY	1	1	1	Q9UBR2		0	863568	0.043	0.2295	1.37756	2	1149.53	-0.181995	35.6151	0	C1203	85.19	C1203	0.0028
Medium	ETIPSEIQV	1	1	1	Q15646		0	1.17438e+06	0.044	0.2342	2.00709	2	1015.53	-0.875976	72.2845	0	C1203	77.78	A6802	0.0062
Medium	ETGKITDFI	1	1	1	P62701		0	4.58815e+06	0.044	0.2359	1.7159	2	1023.54	-0.4156	70.4763	0	C1203	59.26	A6802	0.2543
Medium	LSAGATKVY	1	1	1	P11908		0	573382	0.045	0.2429	2.67462	2	909.504	0.105172	43.2645	0	C1203	81.48	C1203	0.437
Medium	KTTTIAVEV	1	1	1	Q00341		0	907094	0.045	0.2402	2.35612	2	961.555	-1.24474	53.8204	0	C1203	74.07	A6802	0.3991
Medium	AQRQDIAF	1	1	1	P07355		0	7.27701e+06	0.045	0.2394	2.28442	2	948.49	-0.0723705	48.2764	0	C1203	26.67	B1503	0.0753
Medium	AKGAPTSTVY	1	1	1	Q8IW00		0	1.70192e+06	0.045	0.2406	2.11579	2	994.52	-0.417493	42.6892	0	C1203	45.71	B1503	0.052
Medium	LENAKNAY	1	1	1	O00463		0	1.0019e+06	0.045	0.2392	2.10778	2	922.463	-0.0923035	31.8553	0	C1203	33.33	B1503	1.9636
Medium	RSATLAAAAL	1	1	1	Q8NG41		0	4.06699e+06	0.045	0.2426	2.0707	2	944.552	0.00472479	38.9101	0	C1203	51.43	C1203	4.6873
Medium	ETSPHVIQA	2	1	1	O75533		0	9.96461e+07	0.045	0.2404	1.75394	2	981.498	-1.83878	40.9877	0	C1203	48.15	A6802	0.0277
Medium	EVAKIIYIV	1	1	1	P25788		0	3.08154e+06	0.045	0.2412	1.71287	2	1047.64	-0.540825	78.2923	0	C1203	44.44	A6802	0.0073
Medium	KVLDKMKSF	1	1	1	P06744		0	742350	0.046	0.2515	2.4575	2	1095.62	-3.38524	83.498	0	C1203	37.04	C1203	0.1874
Medium	NSAEIDASNIV	1	1	1	Q14207		0	2.36404e+06	0.046	0.2458	2.25923	2	1132.55	0.243824	82.1331	0		0	A6802	1.248
Medium	LVPEFVHNV	1	1	1	Q9HCD6		0	2.42651e+06	0.046	0.2446	1.92802	2	1053.57	-1.39017	67.7405	0	C1203	44.44	A6802	0.0239
Medium	TTFEYPNTI	1	1	1	P02749		0	2.38926e+06	0.046	0.2457	1.8958	2	1085.51	-0.272003	74.0578	0	C1203	74.07	A6802	0.0139
Medium	EVDMVKVPL	1	1	1	Q96RN1		0	4.14428e+06	0.046	0.2469	1.74361	2	1029.56	-3.64862	97.5481	0	C1203	40.74	A6802	0.5804
Medium	NFFPGVFEY	1	1	1	Q76I76		0	186177	0.046	0.2488	1.59905	2	1119.51	-0.142387	101.679	0	C1203	55.56	C1203	0.4299
Medium	SVDSFQIIL	1	1	1	Q5VWP2		0	1.16719e+07	0.047	0.2575	2.09974	2	1021.56	-0.51441	87.805	0	C1203	44.44	C1203	0.9481
Medium	KSLCSRGmY	1	1	1	Q8IUF8	M8(Oxidation)	0	3.09694e+07	0.047	0.2534	2.09869	2	1060.49	-0.186483	77.3165	0	C1203	66.67	C1203	4.5497
Medium	EVYEGEVTEL	1	1	1	Q9Y265		0	0	0.047	0.259	1.88093	2	1167.54	-0.0597795	70.2141	0	C1203	37.14	A6802	0.0819
Medium	RQYEQQTY	1	1	1	Q9Y262		0	658368	0.047	0.2556	1.71818	2	1115.51	-0.198261	32.0588	0	C1203	26.67	B1503	0.0071
Medium	RSYPGLLVV	1	1	1	Q86WG5		0	2.11257e+06	0.047	0.2568	1.60223	2	1003.59	0.934327	73.0552	0	C1203	85.19	C1203	0.0275
Medium	RSSPPGHYY	1	1	1	Q9NX40		0	3.2777e+06	0.047	0.2553	1.55086	2	1063.49	-0.621211	30.717	0	C1203	77.78	C1203	0.1025
Medium	MLGFPPPLF	1	1	1	P48067		0	2.73313e+06	0.048	0.2638	2.10095	2	1018.54	1.83416	89.998	0	C1203	33.33	B1503	0.8706
Medium	HGTSLmNYL	1	2	2	Q16099;Q16478	M6(Oxidation)	0	851039	0.048	0.2612	2.09898	2	1051.49	-0.0169311	91.9765	0	C1203	40.74	C1203	1.669
Medium	KIAEENLTY	1	1	1	Q8IW00		0	708157	0.048	0.2618	2.0927	2	1080.56	-0.587796	32.5344	0	C1203	51.85	B1503	0.2331
Medium	AAISEVLYV	1	1	1	Q4G0J3		0	2.03742e+06	0.048	0.2651	2.06446	2	964.534	-0.559724	85.5807	0	C1203	88.89	C1203	0.2017
Medium	RKIPVPANRY	1	1	1	Q9NRX1		0	924471	0.048	0.2601	1.86131	3	1213.72	0.48887	38.5157	0	C1203	31.43	B1503	0.0568
Medium	TAFVEPFVI	1	2	2	O14983;P16615		0	300024	0.048	0.2644	1.767	2	1022.55	-2.01828	101.441	0	C1203	77.78	C1203	0.449
Medium	VTYGFPImL	1	1	1	P51798	M8(Oxidation)	0	561152	0.048	0.2625	1.61428	2	1056.54	-0.897486	101.175	0	C1203	85.19	C1203	0.0412
Medium	FVVQAVQVGI	1	1	1	Q6NUI2		0	854379	0.048	0.2595	1.57981	2	1059.62	-0.771237	94.7389	0	C1203	17.14	A6802	1.3758
Medium	SKYAADRNHY	1	1	1	P67809		0	273731	0.048	0.2618	1.50981	3	1224.58	0.0207508	23.2453	0	C1203	31.43	B1503	0.2083
Medium	AKSTSGEGF	1	7	7	P49792;P0DJD0;P0DJD1;A6NKT7;Q7Z3J3;Q99666;O14715		0	142146	0.048	0.2619	1.47839	2	883.416	-0.132885	27.6769	0	C1203	37.04	B1503	0.2863
Medium	GKTSLVQRY	1	1	1	O14966		0	843953	0.049	0.2691	2.46623	2	1051.59	-0.441659	35.5929	0	C1203	44.44	B1503	0.3972
Medium	KAFASQNNY	1	1	1	Q86WA9		0	508256	0.049	0.2702	2.38062	2	1042.49	-0.443863	35.3332	0	C1203	77.78	B1503	0.1401
Medium	DTNDNTVTV	1	1	1	Q9NR56		0	1.12863e+06	0.049	0.269	2.27025	2	978.437	-0.368902	44.5684	0	C1203	77.78	A6802	0.0144
Medium	FAIPLGSGL	1	1	1	Q8IVW8		0	2.56174e+06	0.049	0.2694	1.69403	2	874.503	-0.125641	100.359	0	C1203	85.19	C1203	0.0079
Medium	SNSDVIIYV	1	1	1	P38606		0	3.78804e+06	0.049	0.2674	1.61725	2	1009.52	-0.316334	79.7908	0	C1203	51.85	A6802	0.2092

## Sheet: Statistics
Total_Peptides	Tool	A*68:02	B*15:03	C*12:03
1717	Total Syfpeithi allelecoverage with threshold	0	0	571
	Total Syfpeithi allelecoverage with threshold %	0.0000	0.0000	0.3326
	Total NetMHC allelecoverage with threshold	0	0	0
	Total NetMHC allelecoverage with threshold %	0.0000	0.0000	0.0000
	Total NetMHC allelecoverage with 50nM threshold	0	0	0
	Total NetMHC allelecoverage with 50nM threshold %	0.0000	0.0000	0.0000
	Best Syfpeithi	0	0	1642
	Best Syfpeithi %	0.0000	0.0000	0.9563
	Best NetMHC	0	0	0
	Best NetMHC %	0.0000	0.0000	0.0000
	Best Syfpeithi with threshold	0	0	571
	Best Syfpeithi with threshold %	0.0000	0.0000	0.3326
	Best NetMHC with threshold	0	0	0
	Best NetMHC with threshold %	0.0000	0.0000	0.0000
	Best NetMHC with 50nM threshold	0	0	0
	Best NetMHC with 50nM threshold %	0.0000	0.0000	0.0000
