# Supplementary material for: TAPBPR mediates peptide dissociation from MHC class I using a leucine lever
Source: eLife. 2018 Nov 28;7:e40126. doi: 10.7554/eLife.40126 (PMC6307860; doi:10.7554/eLife.40126)
Supplement: Figure 5—source data 5. [file elife-40126-fig5-data5.xlsx]

## Sheet: Filteredpeptides
A2	Sequence	# PSMs	# Proteins	# Protein Groups	Protein Group Accessions	Modifications	ΔCn	Area	q-Value	PEP	IonScore	Exp Value	Charge	MH+ [Da]	ΔM [ppm]	RT [min]	# Missed Cleavages	best_Syf_Allele	best_Syf_Score	best_NetMHC_Allele	best_NetMHC_Score	best_NetMHC_Allele_Rank	best_NetMHC_Rank
High	AAANAIRVY	12	1	1	Q9NRK6		0	1.00823e+07	0	1.579e-15	86.67	7.42494e-07	2	948.526	-0.526012	40.7359	0	C1203	92.59	B1503	11.3	C1203	0.12
High	AAYSDGYGRVY	20	1	1	O43251		0	2.20875e+07	0	4.891e-17	83.42	1.35586e-06	2	1221.55	0.710233	46.6454	0		0	B1503	57.2	B1503	1.3
High	AKLPFTPLSY	17	1	1	Q9UM00		0	2.4264e+07	0	2.452e-21	77.74	4.74682e-06	2	1136.63	-0.110859	72.2966	0	C1203	48.57	B1503	14.2	B1503	0.4
High	AAASAIKVI	14	1	1	P14902		0	1.22397e+07	0	3.537e-12	74.76	8.44511e-06	2	843.53	-0.202264	43.9074	0	C1203	88.89	C1203	146	C1203	0.7
High	KLFGSTSSF	44	1	1	P08174		0	1.98633e+08	0	2.245e-16	74.01	2.02945e-05	2	973.498	-0.57694	53.4401	0	C1203	37.04	B1503	2.9	B1503	0.01
High	FASGLIHRV	82	1	1	Q8N6L1		0	8.21368e+08	0	1.071e-12	72.52	1.39212e-05	2	999.572	-1.21963	41.714	0	C1203	88.89	A6802	15.6	C1203	0.08
High	YKIGDLTGY	31	1	1	Q9NVN8		0	1.52199e+08	0	2.085e-18	69.27	4.25836e-05	2	1029.52	-0.916714	61.0669	0	C1203	44.44	B1503	19.3	B1503	0.5
High	AKVKFEERY	26	1	1	P61353		0	2.34911e+07	0	2.809e-14	69.19	3.83322e-05	2	1169.63	0.0119311	28.2383	0	C1203	40.74	B1503	162.6	B1503	2.5
High	SAYGSVKAY	49	2	2	P07355;A6NMY6		0	4.12992e+08	0	2.552e-13	68.34	6.99506e-05	2	945.467	-0.520008	36.3418	0	C1203	88.89	B1503	7.5	C1203	0.01
High	IKISEGTGF	15	1	1	Q9Y2R4		0	8.99766e+06	0	7.19e-11	66.79	6.57865e-05	2	951.514	-0.306327	49.7719	0	C1203	33.33	B1503	7.2	B1503	0.12
High	SGFSGVIRL	36	1	1	P11309		0	5.1604e+07	0	2.445e-10	66.76	5.73969e-05	2	935.53	-0.79349	63.8281	0	C1203	51.85	C1203	196.7	C1203	0.8
High	MVVDIVQEL	53	1	1	O00764		0	5.21145e+08	0	3.209e-13	66.36	8.91648e-05	2	1045.56	-0.242347	87.4291	0	C1203	48.15	A6802	12.4	C1203	0.06
High	NTVDFFNQI	118	2	2	Q9H8S9;Q7L9L4		0	8.10618e+08	0	3.984e-13	65.71	0.00010023	2	1097.53	-0.064376	85.0817	0	C1203	62.96	A6802	3.5	A6802	0.01
High	SKFPTQISL	18	1	1	O15164		0	2.82162e+07	0	8.99e-10	65.02	0.000101295	2	1020.57	-0.62353	60.5548	0	C1203	51.85	B1503	28.7	B1503	0.7
High	FAIDPHLLLSV	37	1	1	Q29RF7		0	9.03659e+07	0	3.199e-22	65	5.86444e-05	2	1224.7	-0.368673	94.4327	0		0	C1203	270.7	C1203	1.1
High	AKAPPPVFY	34	1	1	Q16643		0	3.25412e+07	0	1.478e-10	64.64	0.000140017	2	989.545	-0.125896	49.0601	0	C1203	59.26	B1503	18.2	B1503	0.5
High	YMVTIVHIY	11	1	1	P50851		0	1.10129e+07	0	3.134e-19	64.55	0.000133724	2	1138.6	-0.274281	71.8494	0	C1203	44.44	B1503	7.7	B1503	0.15
High	SAAEEVKTY	11	1	1	Q5JRA6		0	1.4431e+07	0	5.442e-12	64.53	0.000110169	2	997.483	-0.317097	31.2204	0	C1203	92.59	B1503	74	C1203	0.4
High	AKVANASYY	17	1	1	O15042		0	1.80853e+07	0	1.298e-11	64.47	0.000143981	2	986.494	-0.374343	32.7266	0	C1203	40.74	B1503	13.4	B1503	0.3
High	TAVALLRLL	21	1	1	Q14165		0	1.05197e+07	0	5.207e-11	63.97	1.72573e-05	2	969.646	-0.0266992	81.9859	0	C1203	77.78	C1203	109.9	C1203	0.5
High	FVEWIPNNV	43	8	8	Q9H4B7;Q13885;Q9BVA1;Q13509;P04350;P68371;P07437;Q9BUF5		0	3.58003e+08	0	7.177e-10	63.93	0.000166018	2	1117.57	-0.151059	84.252	0	C1203	44.44	A6802	43.9	A6802	0.4
High	AQNPANMSKY	25	2	2	P50502;Q8NFI4		0	2.70466e+07	0	6.562e-16	63.88	0.000108249	2	1123.52	-0.473914	33.1694	0	C1203	34.29	B1503	7.9	B1503	0.15
High	AAQEAVKLY	8	1	1	O60506		0	1.17878e+07	0	2.629e-13	63.85	0.00016659	2	992.54	-0.959728	43.4579	0	C1203	88.89	B1503	68.4	C1203	0.9
High	AAFLKAIGY	36	1	1	O75533		0	6.86493e+07	0	2.56e-12	63.52	0.000100264	2	953.545	-0.962763	64.7026	0	C1203	85.19	B1503	29.1	B1503	0.7
High	GKYLELLGY	20	1	1	O94979		0	2.69016e+07	0	1.324e-13	63.31	0.000131691	2	1055.58	-0.698846	72.7972	0	C1203	44.44	B1503	29.9	B1503	0.8
High	MAAAWPLLL	22	1	1	P15151		0	9.2588e+07	0	5.464e-11	62.86	0.000158879	2	985.554	-0.184392	103.098	0	C1203	85.19	C1203	7.1	C1203	0.01
High	SQYPFPVTL	47	1	1	Q5R372		0	1.44296e+08	0	6.689e-11	62.78	0.000238545	2	1051.55	-0.305716	86.9771	0	C1203	59.26	B1503	4.8	B1503	0.05
High	YGYDNVKEY	7	1	1	Q96GN5		0	2.6517e+07	0	2.67e-21	62.74	0.000111104	2	1150.5	-0.395504	46.0883	0	C1203	59.26	C1203	8.5	C1203	0.01
High	AAAELIKEV	1	1	1	Q13425		0	4.37965e+06	0	5.279e-07	62.72	0.000168976	2	943.546	-0.307817	49.4303	0	C1203	96.3	C1203	115.6	C1203	0.6
High	HTAAPTDPADGPV	9	1	1	Q04941		0	8.3982e+06	0	1.827e-20	62.39	0.000176116	2	1248.59	-0.15742	38.3046	0		0	A6802	29.8	A6802	0.3
High	ILGPPGSVY	41	3	3	P51965;Q96LR5;Q969T4		0	6.52699e+07	0	3.219e-13	62.32	0.000378997	2	902.498	-0.286867	65.881	0	C1203	48.15	B1503	14.6	B1503	0.4
High	TLIEDILGV	20	1	1	Q8TEL6		0	1.91099e+07	0	1.013e-08	62.32	0.000172413	2	972.561	-0.100261	103.498	0	C1203	48.15	A6802	119	A6802	0.9
High	IGVDFALKV	15	2	2	Q13637;P57729		0	2.12469e+07	0	3.173e-09	62.23	0.000128868	2	961.571	-0.304261	72.9431	0	C1203	44.44	C1203	353	C1203	1.3
High	NTTDIFQTV	60	1	1	P37802		0	2.34416e+09	0	2.03e-06	62.16	0.000241126	2	1038.51	-0.421832	71.5008	0	C1203	74.07	A6802	4	A6802	0.01
High	STSDIITRI	59	2	2	P49585;Q9Y5K3		0	9.62643e+08	0	1.157e-07	62.03	0.000188391	2	1005.56	-0.726966	53.6174	0	C1203	70.37	A6802	16.4	A6802	0.15
High	IAAVIARFY	8	1	1	P40305		0	1.13895e+07	0	9.288e-14	61.81	0.000104743	2	1023.6	-0.30002	67.3048	0	C1203	81.48	B1503	76.7	C1203	0.4
High	SQIRQSTAY	19	1	1	O43150		0	1.38771e+07	0	8.107e-11	61.75	0.000245282	2	1053.53	-0.555674	27.959	0	C1203	37.04	B1503	3.2	B1503	0.02
High	SAVNIIRTF	12	1	1	P29728		0	8.27151e+06	0	3.735e-11	61.71	0.000154433	2	1020.58	-1.29071	60.9161	0	C1203	77.78	B1503	18.8	C1203	0.1
High	AAFDGHAREL	8	1	1	Q3MIP1		0	5.53393e+06	0	0.0001482	61.66	0.00022002	2	1086.53	-0.317587	34.765	0	C1203	82.86	C1203	368.1	C1203	1.4
High	AKWNPTAGVAF	31	1	1	P19387		0	7.79377e+07	0	1.11e-17	61.61	0.000291385	2	1161.6	-0.552265	63.1146	0		0	B1503	59.9	B1503	1.3
High	VKVDELSLY	19	1	1	Q9BUR5		0	2.37025e+07	0	9.632e-16	61.5	0.000170261	2	1065.58	-0.689315	63.0636	0	C1203	44.44	B1503	22.8	B1503	0.6
High	IATSQNRIY	11	1	1	Q99623		0	1.75206e+07	0	2.893e-06	61.06	0.000274357	2	1065.57	-0.103405	35.9259	0	C1203	81.48	B1503	96.5	C1203	1.5
High	IAFPSANEV	19	1	1	Q9NXH9		0	1.51665e+07	0	9.739e-09	61	0.000528149	2	947.483	-0.383696	67.1421	0	C1203	88.89	C1203	10.6	C1203	0.03
High	RLYGPSSVSF	28	1	1	P50454		0	8.92501e+07	0	1.871e-13	60.53	0.000331122	2	1112.57	-0.537245	57.4103	0	C1203	42.86	B1503	5.4	B1503	0.06
High	IKENPSSQY	17	1	1	O75496		0	1.08733e+07	0	4.339e-18	60.2	0.000418526	2	1065.52	-0.0916054	28.717	0	C1203	37.04	B1503	107.2	B1503	2
High	SAMPTVRSF	50	1	1	Q03518		0	302438125	0	2.222e-10	60.06	0.000302048	2	995.497	-0.510512	50.4949	0	C1203	81.48	B1503	6	C1203	0.02
High	AKAPPTACY	143	1	1	P17676		0	3.0965e+08	0	6.554e-09	59.53	0.000565337	2	921.449	-0.490364	31.5594	0	C1203	51.85	B1503	9.8	B1503	0.2
High	LAVPFCVNF	60	1	1	Q9Y266		0	5.60887e+07	0	1.035e-07	59.45	0.000501788	2	1009.52	-0.278105	99.363	0	C1203	77.78	B1503	27	B1503	0.7
High	LVANIIQNV	24	1	1	O94915		0	3.20077e+07	0	0.001651	59.37	0.000176249	2	983.588	-0.0872623	72.5898	0	C1203	44.44	A6802	15.3	A6802	0.15
High	DVAEFLYQV	30	1	1	Q9Y5M8		0	2.72674e+07	0	1.381e-05	59.2	0.000444958	2	1083.54	0.179939	95.5672	0	C1203	44.44	A6802	3	A6802	0.01
High	GAYGQAVRY	18	1	1	Q9UID3		0	1.48125e+07	0	0.0004216	59.01	0.000391693	2	984.49	-0.111406	37.3877	0	C1203	85.19	B1503	41.5	C1203	0.5
High	AKFDGILGM	19	1	1	P07339		0	1.69453e+07	0	2.341e-11	58.77	0.000484964	2	951.497	-0.200353	68.5611	0	C1203	48.15	B1503	19.2	B1503	0.5
High	IIVDIFHGL	10	1	1	Q9Y4E8		0	5.32044e+06	0	1.383e-12	58.62	0.000307648	2	1026.6	0.022307	85.1728	0	C1203	40.74	A6802	63.7	A6802	0.6
High	SSSGIVYKV	8	1	1	Q9P2E3		0	1.68164e+07	0	8.665e-07	58.49	0.000336039	2	939.514	-0.548811	40.6183	0	C1203	77.78	A6802	12.5	A6802	0.1
High	SQFGGGSQY	37	1	1	O15371		0	2.48831e+08	0	0.000145	58.27	0.000176191	2	930.394	-1.40138	41.8985	0	C1203	44.44	B1503	2.6	B1503	0.01
High	STADVIQHC	15	1	1	Q5SRE5		0	3.22897e+07	0	6.411e-05	58.23	0.00034219	2	973.441	-0.259881	36.8608	0	C1203	40.74	A6802	182.6	A6802	1.2
High	AAATRTTSF	9	1	1	Q9H3F6		0	4.85575e+06	0	0.000283	58.07	0.000576099	2	925.473	-0.53713	27.082	0	C1203	74.07	B1503	12.7	B1503	0.3
High	YLADIFTKL	27	1	1	Q49AG3		0	2.5892e+07	0	2.076e-15	58.07	0.000346844	2	1083.61	-0.623487	81.9185	0	C1203	48.15	C1203	22.6	C1203	0.09
High	SSAPTARVF	22	1	1	O94906		0	5.98212e+07	0	6.277e-06	58.05	0.000613853	2	935.493	-1.23628	39.6958	0	C1203	77.78	B1503	17.5	C1203	0.17
High	TVSEVIQGLL	18	1	1	Q8WWW0		0	1.45355e+07	0	1.396e-08	57.56	0.000486176	2	1058.61	-0.414745	90.6393	0	C1203	28.57	A6802	105	A6802	0.8
High	VGVDFALKV	11	1	1	O14966		0	2.07768e+07	0	1.192e-06	57.44	0.000469776	2	947.556	-0.604444	68.9056	0	C1203	48.15	C1203	506	C1203	1.7
High	SKYEALQTF	14	2	2	O15525;O60675		0	1.50055e+07	0	1.414e-10	57.31	0.00071702	2	1086.55	-0.405987	51.1841	0	C1203	40.74	B1503	3.8	B1503	0.03
High	LTFAGVKMY	8	1	1	P58511		0	7.33853e+06	0	8.702e-05	57.28	0.000731343	2	1029.54	-0.416437	69.3803	0	C1203	77.78	C1203	32	C1203	0.15
High	GQYGNPLNKY	70	1	1	O14672		0	7.50521e+08	0	7.597e-13	57.24	0.000685624	2	1153.56	-0.868293	45.9287	0	C1203	34.29	B1503	14.8	B1503	0.4
High	MASALVHIL	26	1	1	Q5VWQ8		0	2.80438e+07	0	0.0001186	56.99	0.000392073	2	954.544	-0.357756	66.119	0	C1203	81.48	C1203	22.8	C1203	0.09
High	FASFILRTL	12	1	1	O95838		0	8.92389e+06	0	1.115e-10	56.95	0.000324452	2	1067.62	-0.149783	78.773	0	C1203	88.89	C1203	8.1	C1203	0.01
High	DVADVLLQA	6	2	2	Q8IWZ3;O75179		0	5.488e+06	0	7.077e-05	56.88	0.000798312	2	943.51	0.158826	85.51	0	C1203	11.11	A6802	22.8	A6802	0.25
High	IALPSLRIL	38	1	1	P00403		0	6.83884e+07	0	1.578e-06	56.66	3.85157e-05	2	995.661	-0.418917	81.7414	0	C1203	85.19	C1203	139.2	C1203	0.7
High	TVADVDEKA	8	1	1	Q13118		0	6.01218e+06	0	7.166e-06	56.42	0.000897543	2	947.468	-0.392978	27.8095	0	C1203	7.41	A6802	97.2	A6802	0.8
High	SKLSFSQVF	8	1	1	Q9UJX4		0	3.95134e+07	0	1.812e-11	56.39	0.0008707	2	1042.56	-0.469315	64.8038	0	C1203	37.04	B1503	4.2	B1503	0.04
High	AAYGYGIRY	28	3	3	P11216;P06737;P11217		0	8.51612e+07	0	1.324e-06	56.3	0.000798913	2	1033.51	0.125983	51.0087	0	C1203	88.89	B1503	8.9	C1203	0.15
High	YVSEILEKV	15	1	1	P42704		0	1.12286e+07	0	1.331e-10	56.29	0.000559213	2	1079.6	-0.251242	61.3018	0	C1203	48.15	A6802	6.8	A6802	0.04
High	FAYGGWNYL	33	1	1	Q01650		0	7.47253e+07	0	1.7e-14	56.15	0.000675811	2	1090.5	-0.304754	89.1258	0	C1203	85.19	C1203	2.8	C1203	0.01
High	FKFMPPPTY	92	1	1	Q9H3M7		0	1.63311e+08	0	1.368e-14	56.07	0.000816287	2	1127.56	-0.0776273	66.1868	0	C1203	51.85	B1503	3.4	B1503	0.02
High	TAFPFQVEV	32	1	1	A6NHR9		0	3.78211e+07	0	2.702e-05	55.84	0.00125656	2	1037.53	-0.422682	88.5937	0	C1203	92.59	A6802	9.9	C1203	0.05
High	ITGPLIRIL	21	1	1	Q92616		0	1.36274e+07	0	9.232e-09	55.81	4.68423e-05	2	995.661	-0.296315	73.967	0	C1203	81.48	C1203	675.2	C1203	2
High	MTALVNVAL	3	2	2	Q8WVM7;Q8N3U4		0	1.38651e+07	0	3.446e-11	55.55	0.0010604	2	931.528	-0.444152	80.4128	0	C1203	74.07	A6802	4.6	A6802	0.01
High	IAIPFLIKL	24	1	1	Q8N2K0		0	2.14702e+07	0	3.177e-15	55.54	4.69147e-05	2	1027.69	-0.016981	94.2934	0	C1203	85.19	C1203	73.5	C1203	0.4
High	AQLHPLSGY	15	1	1	Q7L7V1		0	1.19013e+07	0	4.939e-12	55.38	0.00108404	2	985.51	-0.621219	45.2076	0	C1203	40.74	B1503	5.8	B1503	0.08
High	AQVWMITRY	7	1	1	Q9BVK8		0	1.48193e+07	0	6.648e-17	55.26	0.00103086	2	1167.6	0.29368	66.7466	0	C1203	44.44	B1503	5.7	B1503	0.07
High	NVAEIVIHI	31	1	1	Q9BZD4		0	1.17895e+08	0	7.209e-09	55.25	0.000515725	2	1007.59	-0.388061	70.854	0	C1203	44.44	A6802	5.1	A6802	0.02
High	AIAPIIAAV	13	1	1	Q9BQ52		0	1.16155e+07	0	6.977e-05	55.21	0.000147035	2	838.539	-0.510526	78.3798	0	C1203	55.56	A6802	14.5	A6802	0.12
High	YQADIERMY	30	1	1	O95573		0	7.96454e+07	0	1.027e-15	55.14	0.000700883	2	1188.54	0.125162	54.4221	0	C1203	51.85	B1503	5.3	B1503	0.06
High	AGYQHIRMY	10	1	1	Q9BVC4		0	8.9346e+06	0	1.152e-08	55.04	0.0011424	2	1138.55	-0.589765	38.1716	0	C1203	51.85	B1503	27.6	C1203	0.5
High	KGSSAVRVY	21	1	1	P10914		0	3.68321e+07	0	1.327e-06	54.87	0.00095796	2	966.536	-0.390863	23.5026	0	C1203	55.56	B1503	38.4	B1503	0.9
High	GKVGGLLAF	37	1	1	P28340		0	5.50295e+07	0	1.644e-05	54.82	0.000597088	2	861.519	-0.551205	63.8973	0	C1203	37.04	B1503	8.7	B1503	0.17
High	AKYPHVEDY	36	1	1	P61289		0	6.3455e+07	0	5.25e-15	54.72	0.00117005	2	1121.53	-0.589381	36.2264	0	C1203	55.56	B1503	8.3	B1503	0.15
High	GQRKGAGSVF	24	1	1	P62917		0	6.17379e+07	0	0.001106	54.6	0.0011718	2	1006.54	-0.683934	23.0379	0	C1203	42.86	B1503	9.8	B1503	0.2
High	GKIFTFGSY	3	3	3	P51003;Q9NRJ5;Q9BWT3		0	6.4675e+06	0	1.743e-05	54.59	0.00169354	2	1019.52	-0.529365	65.4932	0	C1203	37.04	B1503	8.7	B1503	0.17
High	MSSSVVVRL	18	1	1	A0JNW5		0	2.40739e+07	0	0.0001318	54.55	0.00134566	2	977.545	-0.221987	52.4274	0	C1203	81.48	A6802	26	C1203	0.17
High	FVFPGELLL	69	1	1	Q15758		0	1.30703e+08	0	6.319e-08	54.55	0.000898802	2	1034.59	-0.650534	106.828	0	C1203	55.56	C1203	10.8	C1203	0.03
High	GKFQDNFEF	19	2	2	Q15691;Q9UPY8		0	3.14056e+07	0	5.856e-07	54.54	0.000752867	2	1131.51	-0.804365	61.9518	0	C1203	37.04	B1503	18.8	B1503	0.5
High	TLFGSVIRY	19	1	1	P09871		0	1.30575e+07	0	4.776e-13	54.34	0.00108248	2	1055.59	0.101626	70.0009	0	C1203	51.85	B1503	36.9	B1503	0.9
High	AQYDQASTKY	7	1	1	P49454		0	5.53038e+06	0	2.875e-12	54.04	0.00106089	2	1174.54	-0.197742	33.2733	0	C1203	40	B1503	4.9	B1503	0.05
High	ALIEFIRSEY	39	1	1	P26639		0	1.82098e+08	0	5.273e-19	53.93	0.00138911	2	1240.66	0.20715	75.0725	0	C1203	31.43	B1503	60.8	B1503	1.3
High	KKFFGEFTGF	37	1	1	Q15029		0	9.28553e+07	0	6.704e-13	53.92	0.00151741	2	1207.61	-0.513433	64.2203	0	C1203	42.86	B1503	16.3	B1503	0.4
High	IAFPTSISV	48	1	1	Q9UQ80		0	1.99344e+08	0	1.208e-07	53.89	0.00133541	2	934.524	-0.31547	82.2031	0	C1203	88.89	C1203	10.8	C1203	0.03
High	NVVDVFHAV	20	1	1	Q15262		0	37075294	0	0.00139	53.89	0.00150139	2	999.526	0.136305	65.7285	0	C1203	40.74	A6802	2.5	A6802	0.01
High	DVVNILVYV	23	1	1	Q15652		0	2.58441e+07	0	5.334e-10	53.89	0.000994258	2	1033.59	-0.0389551	104.559	0	C1203	40.74	A6802	4.7	A6802	0.01
High	VKGVSLSSY	9	1	1	Q9Y3B1		0	8.86603e+06	0	0.002947	53.65	0.00102421	2	939.514	-0.548811	43.9978	0	C1203	40.74	B1503	15.2	B1503	0.4
High	FTADFVRQL	29	1	1	Q96Q15		0	3.4685e+07	0	3.767e-12	53.65	0.00155606	2	1096.58	-0.297864	67.3856	0	C1203	85.19	C1203	7.7	C1203	0.01
High	MVAPVWYLV	20	1	1	Q96HY6		0	1.33643e+07	0	3.138e-05	53.54	0.00152848	2	1077.58	-0.0701352	102.322	0	C1203	48.15	A6802	2	A6802	0.01
High	SKNVSGISF	14	1	1	P49792		0	1.1429e+07	0	1.269e-08	53.52	0.00149018	2	938.494	-0.674941	45.3402	0	C1203	33.33	B1503	5.9	B1503	0.08
High	YMIDPSGVSY	27	1	1	P25788		0	7.36304e+07	0	1.102e-14	53.51	0.000898666	2	1131.5	-0.421065	72.8066	0	C1203	48.57	B1503	5	B1503	0.05
High	SKYPASSSVF	5	1	1	P09629		0	1.07783e+07	0	0.001695	53.47	0.00173907	2	1072.53	-1.29851	44.3876	0	C1203	40	B1503	4	B1503	0.03
High	FVNDIFERI	229	14	14	P33778;P62807;P58876;Q93079;P06899;O60814;Q99880;Q99879;Q99877;P23527;Q16778;Q5QNW6;Q8N257;P57053		0	2.93007e+09	0	7.315e-10	53.29	0.00181149	2	1152.6	-0.0497769	76.5774	0	C1203	37.04	A6802	12	A6802	0.1
High	EVLDFITHL	48	1	1	Q13057		0	1.81589e+08	0	3.312e-08	53.21	0.00209659	2	1086.58	-1.10124	87.3711	0	C1203	44.44	A6802	17.7	A6802	0.17
High	TVSEVIQGL	27	1	1	Q8WWW0		0	3.12359e+07	0	3.837e-08	53.07	0.00196382	2	945.525	-0.180135	70.7305	0	C1203	48.15	A6802	19.2	A6802	0.17
High	SSYLFIVKY	29	1	1	Q96QD8		0	4.92131e+07	0	7.036e-13	53.02	0.00182567	2	1119.61	-0.258487	73.2806	0	C1203	77.78	B1503	81	C1203	1
High	YQSDPSGNY	10	1	1	P25789		0	1.71557e+07	0	5.885e-14	52.8	0.000379961	2	1030.41	-0.532962	37.2601	0	C1203	48.15	B1503	5	B1503	0.05
High	FAFSGVLRA	30	1	1	Q92766		0	8.82004e+07	0	1.379e-09	52.79	0.00138869	2	967.536	-0.287467	66.3032	0	C1203	55.56	C1203	14.8	C1203	0.05
High	MAVEFLHEL	3	1	1	Q9NR45		0	3.97553e+06	0	3.195e-10	52.74	0.00251501	2	1088.54	-0.288687	74.4461	0	C1203	81.48	C1203	10.3	C1203	0.03
High	GQYPTQPTY	34	1	1	Q15038		0	1.06005e+09	0	1.04e-06	52.66	0.00193169	2	1054.48	-0.651821	49.336	0	C1203	51.85	B1503	3.1	B1503	0.01
High	DVSNPQTVGV	15	1	1	O60493		0	5.6361e+07	0	0.0002309	52.65	0.00192338	2	1015.51	0.149219	51.5589	0	C1203	28.57	A6802	45	A6802	0.4
High	GKLGFLASY	19	1	1	Q12772		0	2.11922e+07	0	0.0009703	52.62	0.00193015	2	955.525	-0.142888	62.5681	0	C1203	40.74	B1503	11.9	B1503	0.3
High	AQIKFLNTY	7	1	1	Q8ND90		0	1.09178e+07	0	6.27e-09	52.6	0.00168187	2	1097.6	-0.959651	59.7902	0	C1203	44.44	B1503	2.9	B1503	0.01
High	YAYLYIRML	5	1	1	O75643		0	1.04812e+07	0	9.558e-15	52.58	0.00238028	2	1205.64	-0.0263978	81.133	0	C1203	88.89	C1203	11.7	C1203	0.03
High	NTFFSETGA	23	5	5	Q71U36;P68363;Q9BQE3;Q13748;Q6PEY2		0	4.55783e+07	0	0.002947	52.49	0.00110332	2	973.426	-0.435047	60.4348	0	C1203	33.33	A6802	15.5	A6802	0.15
High	KQIFETIYY	27	1	1	P23921		0	6.64437e+07	0	1.292e-12	52.47	0.00240991	2	1204.62	-0.360322	67.3604	0	C1203	40.74	B1503	4.2	B1503	0.04
High	VQGIFVEKY	22	3	3	P62834;P61224;A6NIZ1		0	4.54374e+07	0	1.086e-10	52.39	0.00182806	2	1082.59	0.065643	56.1585	0	C1203	44.44	B1503	47.3	B1503	1.1
High	AASALIRTL	9	1	1	Q13535		0	9.23209e+06	0	7.742e-09	52.28	0.00136532	2	915.562	0.267883	51.5417	0	C1203	92.59	C1203	106.2	C1203	0.5
High	DTAEIIKTL	29	1	1	P82909		0	3.93927e+07	0	9.845e-08	52.24	0.0016517	2	1003.57	-0.1696	64.0775	0	C1203	85.19	A6802	32.9	A6802	0.3
High	NASPVISSV	18	1	1	Q96T58		0	5.07573e+07	0	2.551e-05	52.16	0.00347458	2	873.467	-0.236385	51.0505	0	C1203	88.89	A6802	8.5	A6802	0.06
High	YAIDNPLHY	17	1	1	A5YKK6		0	2.04739e+07	0	1.49e-15	52.04	0.00234502	2	1105.53	-0.224184	63.0389	0	C1203	88.89	C1203	10.7	C1203	0.03
High	AKYESQTSF	21	1	1	Q9P0U4		0	2.19215e+07	0	4.048e-14	52	0.00198436	2	1060.49	-0.725405	34.6636	0	C1203	40.74	B1503	2.8	B1503	0.01
High	YAFPKAVSVF	36	1	1	O15427		0	1.50235e+08	0	3.982e-12	51.97	0.00209882	2	1128.61	-0.250923	73.1086	0	C1203	77.14	B1503	5.9	C1203	0.04
High	TVIAKVNNV	12	1	1	P26639		0	2.19144e+07	0	2.657e-05	51.96	0.00193809	2	957.572	-0.445962	37.2123	0	C1203	40.74	A6802	11.7	A6802	0.09
High	YCAEIAHNV	46	1	1	P62910		0	1.14169e+08	0	1.956e-12	51.88	0.00183337	2	1019.46	-1.0648	42.6237	0	C1203	48.15	A6802	42.5	A6802	0.4
High	DVSNVIEKV	51	1	1	O94955		0	7.11821e+08	0	0.001239	51.87	0.00303155	2	1002.55	-0.155551	55.2477	0	C1203	44.44	A6802	30.2	A6802	0.3
High	YKLLGGLAV	44	1	1	P23396		0	2.01653e+08	0	0.002812	51.8	0.00059099	2	933.577	-0.0562459	69.4087	0	C1203	44.44	B1503	53.1	B1503	1.2
High	AKYPEIKSL	10	1	1	O15121		0	7.2235e+07	0	2.462e-05	51.74	0.00155614	2	1048.6	-2.63356	41.1945	0	C1203	59.26	B1503	83	B1503	1.7
High	SIAGIFKEV	25	1	1	Q9NQQ7		0	2.77053e+07	0	0.0003834	51.71	0.00193117	2	963.551	-0.252697	65.6904	0	C1203	51.85	A6802	19.4	A6802	0.17
High	SIAQIIVTV	20	1	1	Q9UNQ0		0	3.33751e+07	0	0.002947	51.67	0.00120632	2	943.582	-0.106383	83.1052	0	C1203	51.85	A6802	23.4	A6802	0.25
High	KQFRPPMGGY	22	1	1	Q9UKK9		0	23150078	0	6.754e-09	51.67	0.00259748	2	1180.59	-0.347507	40.7737	0	C1203	42.86	B1503	10.3	B1503	0.25
High	GQFGTINNF	15	1	1	Q14457		0	2.51235e+07	0	0.0002149	51.61	0.00218979	2	997.474	-0.13122	67.277	0	C1203	40.74	B1503	3.6	B1503	0.03
High	NAYDFIMKL	22	1	1	P08183		0	4.8072e+07	0	3.084e-11	51.47	0.00259835	2	1114.56	0.0331636	82.6923	0	C1203	85.19	C1203	13.6	C1203	0.04
High	SKKIDRHMY	23	1	1	P84098		0	3.04074e+07	0	3.507e-15	51.44	0.00270106	2	1177.61	-0.111877	19.5582	0	C1203	37.04	B1503	311.3	B1503	4
High	DTAEIFHSA	32	1	1	Q92538		0	5.65882e+07	0	0.0001352	51.43	0.00254649	2	990.452	-0.488896	48.1727	0	C1203	37.04	A6802	3.4	A6802	0.01
High	YKAAAGEDY	24	1	1	P23381		0	59006275	0	4.086e-11	51.32	0.00178167	2	987.441	-0.444063	30.2297	0	C1203	44.44	B1503	35.3	B1503	0.9
High	AKVDLNSNGF	6	1	1	P13797		0	1.09187e+07	0	2.076e-05	51.32	0.00324936	2	1064.54	-0.33868	46.3595	0	C1203	37.14	B1503	137.4	B1503	2.5
High	DQAEIRSLV	21	2	2	P09913;O14879		0	2.65654e+07	0	0.0003289	51.31	0.00347171	2	1030.55	-0.61101	55.461	0	C1203	44.44	A6802	234.1	A6802	1.4
High	AQGPTPRYF	59	1	1	O60427		0	8.39013e+08	0	8.327e-08	51.08	0.002954	2	1036.52	-0.988085	44.8615	0	C1203	48.15	B1503	8.2	B1503	0.15
High	DVNAIIHYL	1	1	1	P09914		0	5.24032e+06	0	3.043e-06	51.08	0.00328464	2	1057.57	-0.371569	81.9838	0	C1203	40.74	A6802	13.7	A6802	0.12
High	VASDLVMKV	14	1	1	Q9NYU2		0	1.52875e+07	0	0.001695	51.03	0.00297045	2	961.538	-0.378168	53.2134	0	C1203	88.89	C1203	60.3	C1203	0.3
High	GKWPSSQQY	11	1	1	Q8TD26		0	9.82228e+06	0	0.001285	51.02	0.00261122	2	1080.51	-0.790308	38.7598	0	C1203	44.44	B1503	17.8	B1503	0.5
High	AQEDAQRLY	6	1	1	P20073		0	6.98863e+06	0	4.473e-05	50.96	0.00297623	2	1093.53	-0.587433	36.5825	0	C1203	48.15	B1503	24.7	B1503	0.6
High	GQYNKEDPTSF	13	1	1	Q15437		0	2.86764e+07	0	9.079e-15	50.93	0.0017299	2	1285.57	-0.992866	41.632	0		0	B1503	24.5	B1503	0.6
High	GKVGAHAGEY	16	1	1	P69905		0	6.25328e+06	0	3.512e-06	50.87	0.00307497	2	988.485	-0.106826	20.4515	0	C1203	31.43	B1503	121.5	B1503	2.5
High	GKTTQITQY	13	1	2	Q14562;Q92620		0	1.32456e+07	0	2.843e-13	50.71	0.00280314	2	1039.54	-0.190204	31.6479	0	C1203	40.74	B1503	147.4	B1503	2.5
High	NAFSGVMmL	121	1	1	Q9NTX5	M8(Oxidation)	0	4.96849e+07	0	1.128e-07	50.55	0.0020991	2	985.448	-0.482857	81.2587	0	C1203	85.19	C1203	22.4	C1203	0.09
High	GKIGTVMTF	15	1	1	P30046		0	4.76327e+07	0	0.0001887	50.42	0.0027339	2	953.513	0.488459	55.9941	0	C1203	40.74	B1503	6	B1503	0.08
High	VKLPSGEDY	50	1	1	Q9Y2Z0		0	115204965	0	0.0007027	50.32	0.00444603	2	1007.5	-0.907885	45.9926	0	C1203	48.15	B1503	118.9	B1503	2.5
High	SMGPVRVAF	20	1	1	P29279		0	3.79631e+07	0	7.787e-05	50.24	0.00261445	2	963.509	0.436099	58.6856	0	C1203	40.74	B1503	8	B1503	0.15
High	FAYPAIRYL	75	1	1	P51398		0	2.89715e+08	0	2.492e-13	50.18	0.00223924	2	1113.61	-0.322423	73.9366	0	C1203	96.3	C1203	2.4	C1203	0.01
High	EISSILQEL	32	2	2	Q96L14;Q5SW79		0	8.49488e+07	0	3.727e-05	49.96	0.00390732	2	1031.56	0.0950185	90.153	0	C1203	48.15	A6802	41.7	A6802	0.4
High	TQmPDPKTF	28	1	1	Q9Y5V0	M3(Oxidation)	0	1.77609e+07	0	0.001591	49.94	0.00381636	2	1080.5	-0.430563	36.3961	0	C1203	48.15	B1503	4.4	B1503	0.04
High	SAVDFIRTL	46	1	1	Q9UEE5		0	3.33576e+08	0	3.792e-05	49.93	0.00318594	2	1021.57	-0.463987	73.0253	0	C1203	88.89	C1203	13.9	C1203	0.04
High	SAISSVRLY	21	1	1	P42285		0	2.22601e+07	0	2.807e-07	49.78	0.00283819	2	995.552	-0.18568	54.6364	0	C1203	85.19	B1503	19.6	C1203	0.09
High	IQKAVSEGY	15	1	1	P32320		0	2.1592e+07	0	7.138e-11	49.75	0.00411414	2	994.52	-0.172007	31.5897	0	C1203	37.04	B1503	9.4	B1503	0.17
High	SSVPGVRLL	15	1	1	P08670		0	2.33708e+07	0	4.944e-06	49.61	0.00226887	2	927.562	-0.261996	57.4714	0	C1203	81.48	C1203	48.5	C1203	0.25
High	AAMPRPVSY	20	1	1	Q6TFL4		0	2.9174e+07	0	0.0008651	49.61	0.0041275	2	991.502	-0.711446	43.8678	0	C1203	92.59	B1503	7.3	C1203	0.04
High	FISEIIHQL	3	1	1	Q9C040		0	8.6414e+06	0	1.576e-05	49.61	0.00379001	2	1099.61	-0.212637	75.1658	0	C1203	51.85	A6802	10	C1203	0.06
High	SAYPLSVEW	20	1	1	Q13610		0	5.88944e+07	0	5.117e-09	49.57	0.00493082	2	1051.51	-0.186739	83.5675	0	C1203	55.56	C1203	85.8	C1203	0.4
High	EILNIFQGV	6	1	1	Q9H0H0		0	4.80471e+06	0	0.002947	49.56	0.00510043	2	1032.57	-0.15309	94.9704	0	C1203	37.04	A6802	11.8	A6802	0.1
High	EVYPFGIVGM	18	1	1	O75534		0	1.40607e+07	0	1.602e-12	49.53	0.00420869	2	1111.55	0.0564122	96.7858	0	C1203	28.57	A6802	35.5	A6802	0.4
High	EIMEIMQNL	18	1	1	Q13352		0	10901579	0	9.651e-08	49.51	0.00400255	2	1120.54	-0.103562	88.7111	0	C1203	40.74	A6802	14.4	A6802	0.12
High	SISDVIAQV	34	1	1	Q9HCJ1		0	1.04503e+08	0	1.721e-05	49.43	0.00488882	2	931.509	-0.287053	75.3656	0	C1203	48.15	A6802	10.4	A6802	0.08
High	IKISNPTEF	24	1	1	Q9BXS6		0	5.44392e+07	0	2.945e-13	49.42	0.00496466	2	1048.57	-0.884494	55.1568	0	C1203	40.74	B1503	5	B1503	0.05
High	MKLLTGLVF	19	2	2	P0DJI8;P0DJI9		0	3.42229e+07	0	3.888e-09	49.23	0.00134682	2	1021.61	-0.491172	82.7584	0	C1203	37.04	B1503	3.7	B1503	0.03
High	EVAPPPPPV	13	1	1	Q14839		0	2.42527e+07	0	0.0001881	49.21	0.00775596	2	902.498	-0.309027	55.3582	0	C1203	51.85	A6802	6.1	A6802	0.03
High	KAFQKIVVL	71	2	2	Q7L1Q6;Q9Y6E2		0	1.49792e+09	0	0.0001053	49.14	0.000366306	2	1045.68	-0.773003	48.6919	0	C1203	88.89	C1203	36.9	C1203	0.17
High	FAMEFVKYY	4	1	1	Q8IWV7		0	6.23042e+06	0	9.224e-10	49.04	0.00378207	2	1197.56	-0.359543	75.4705	0	C1203	88.89	C1203	4.5	C1203	0.01
High	EVAELFQRL	28	1	1	Q4V328		0	7.48496e+07	0	1.229e-05	49.03	0.00487226	2	1104.6	-0.493982	70.6177	0	C1203	44.44	A6802	15.7	A6802	0.15
High	SVSPVVRVAV	96	1	1	P13639		0	1.30367e+09	0	0.002063	49.02	0.0018866	2	1012.62	0.327576	52.6695	0	C1203	25.71	A6802	26.4	A6802	0.25
High	NAFPEIFYT	25	1	1	Q99570		0	2.2005e+07	0	0.00188	48.99	0.00390346	2	1101.52	-0.200956	88.4085	0	C1203	51.85	A6802	147.1	A6802	1
High	TLADVLYHV	12	1	1	Q9UBL3		0	1.99764e+07	0	1.098e-07	48.94	0.00705615	2	1030.56	-0.583527	72.9977	0	C1203	44.44	A6802	5.7	A6802	0.03
High	GKNLYTNEY	11	3	3	Q9HCP0;P78368;Q9Y6M4		0	8.1367e+06	0	8.868e-09	48.92	0.00407332	2	1101.52	0.142106	37.8537	0	C1203	40.74	B1503	24.2	B1503	0.6
High	FSFDYIVKW	24	1	1	Q9BSJ2		0	3.27505e+07	0	2.66e-12	48.81	0.00644526	2	1204.6	0.240913	89.6215	0	C1203	48.15	C1203	153.2	C1203	0.7
High	VAFNWIIVH	1	1	1	Q92995		0	2.58002e+06	0	9.337e-06	48.76	0.00268619	2	1098.61	-0.64541	81.5302	0	C1203	55.56	B1503	260.2	C1203	1.1
High	ETFKDFPQm	65	2	2	P15170;Q8IYD1	M9(Oxidation)	0	3.29156e+07	0	7.955e-14	48.73	0.00296537	2	1158.51	-0.99052	48.8101	0	C1203	62.96	A6802	240.4	A6802	1.4
High	DIFPIVIHV	15	1	1	Q9BXL6		0	1.7018e+07	0	0.0006109	48.62	0.00234961	2	1052.61	-0.581839	91.8119	0	C1203	55.56	A6802	12.2	A6802	0.1
High	SVYEGGVFFL	25	3	3	P51965;Q96LR5;Q969T4		0	2.03141e+07	0	3.013e-09	48.62	0.00548861	2	1117.56	-0.470221	96.4517	0	C1203	37.14	A6802	57.9	A6802	0.5
High	KAITFVTQY	22	1	1	Q9H0S4		0	4.8234e+07	0	1.194e-06	48.61	0.00446078	2	1070.59	-0.0383023	54.7976	0	C1203	77.78	B1503	10	B1503	0.2
High	VKVIQQESY	29	1	1	P60228		0	5.45233e+07	0	1.257e-05	48.61	0.00478029	2	1093.59	-0.370153	38.9827	0	C1203	40.74	B1503	88.8	B1503	1.7
High	VALNFIISY	23	2	2	P50616;Q14106		0	5.393e+07	0	2.065e-13	48.57	0.00344986	2	1039.58	-0.204362	94.4814	0	C1203	85.19	B1503	13.7	C1203	0.3
High	KLFIGGLSF	26	4	4	Q32P51;P09651;P22626;P51991		0	4.89134e+07	0	9.571e-06	48.43	0.0023097	2	981.576	-0.62331	81.0618	0	C1203	37.04	B1503	3.8	B1503	0.03
High	NKYMGLTQF	11	1	1	Q16665		0	1.77465e+07	0	1.622e-07	48.35	0.00610313	2	1101.54	-0.720148	58.1887	0	C1203	33.33	B1503	10.3	B1503	0.25
High	EVYAGNFVEV	17	1	1	Q9UBS4		0	2.52756e+07	0	6.446e-11	48.35	0.00581508	2	1126.54	-0.117053	74.0564	0	C1203	31.43	A6802	6	A6802	0.03
High	SQYGSQVGY	17	1	1	Q14147		0	1.71805e+07	0	0.002626	48.27	0.00300776	2	988.437	-0.495999	44.9782	0	C1203	48.15	B1503	3.5	B1503	0.02
High	VKTGTITTF	60	1	1	P13639		0	4.78242e+08	0	7.197e-06	48.19	0.00244928	2	967.545	-1.35191	44.4336	0	C1203	44.44	B1503	6.1	B1503	0.08
High	LAFPGEMLL	22	1	1	P43007		0	2.72232e+07	0	4.78e-08	48.18	0.00692077	2	990.533	-0.416946	98.0999	0	C1203	85.19	C1203	18.4	C1203	0.07
High	MKVLLAAAL	12	1	1	P23284		0	1.91239e+07	0	1.884e-05	48.13	0.00141356	2	929.585	-0.249282	67.8523	0	C1203	37.04	B1503	17.6	B1503	0.5
High	RLYFSQQTY	28	1	1	P33897		0	5.97312e+07	0	2.035e-11	47.83	0.00662973	2	1205.59	-0.256478	52.2463	0	C1203	44.44	B1503	3.9	B1503	0.03
High	AQHLTVSGF	7	1	1	Q96GX5		0	1.16202e+07	0	0.0002854	47.82	0.00861663	2	959.494	-0.622429	48.4013	0	C1203	37.04	B1503	3.6	B1503	0.03
High	DAANVMVYV	13	1	1	Q9Y4C1		0	1.87638e+07	0	0.0004585	47.61	0.00724123	2	981.471	-0.35825	78.751	0	C1203	81.48	A6802	3.8	A6802	0.01
High	MATPLLMQA	10	1	1	P04233		0	23816386	0	0.002947	47.59	0.00824397	2	975.5	-0.021113	73.6591	0	C1203	44.44	A6802	113.4	C1203	0.6
High	AAIGLVIYY	19	1	1	P51571		0	7.10885e+07	0	0.0003276	47.58	0.0035222	2	982.56	-0.355089	89.0002	0	C1203	88.89	B1503	61.6	C1203	0.6
High	FGFPGERTY	42	1	1	Q9Y4K0		0	1.86394e+08	0	1.022e-14	47.52	0.00484036	2	1073.5	-0.964487	57.5392	0	C1203	59.26	B1503	10.2	C1203	0.04
High	KASGTLREY	24	1	1	Q02543		0	1.17615e+08	0	4.102e-06	47.51	0.00573152	2	1024.54	-0.534605	22.9968	0	C1203	88.89	B1503	39.8	C1203	0.8
High	AKFSLPVSL	8	1	1	Q12980		0	9.63181e+06	0	1.74e-05	47.46	0.00386496	2	961.571	-0.484284	72.3458	0	C1203	55.56	B1503	15.7	B1503	0.4
High	AKYLDEDTIY	14	1	1	P31153		0	2.22217e+07	0	1.237e-13	47.41	0.00555911	2	1230.59	-0.0801113	55.4832	0	C1203	34.29	B1503	39.2	B1503	1
High	GKVTSIMQF	19	1	1	Q14562		0	1.9407e+07	0	7.802e-09	47.37	0.0062033	2	1010.53	-0.17937	57.8806	0	C1203	33.33	B1503	13.5	B1503	0.3
High	EVNSGIYRV	21	1	1	Q0VDF9		0	3.98565e+07	0	1.596e-07	47.36	0.0074288	2	1036.54	-0.646182	43.6684	0	C1203	44.44	A6802	9.6	A6802	0.07
High	SSYDKPITF	15	1	1	Q86X10		0	2.33758e+07	0	5.429e-09	47.27	0.00692342	2	1057.52	-0.475122	52.6488	0	C1203	77.78	C1203	10.8	C1203	0.03
High	FAAFFSHIL	23	1	1	Q86XA9		0	2.13844e+07	0	7.077e-08	47.25	0.00495588	2	1052.56	-0.790181	84.3538	0	C1203	81.48	C1203	10.1	C1203	0.03
High	FAISILQQI	49	1	1	P60842		0	8.61328e+07	0	4.134e-07	47.17	0.00413377	2	1032.61	-0.274251	96.4063	0	C1203	74.07	C1203	8.3	C1203	0.01
High	YSYFSPRTM	13	1	1	Q15003		0	1.43721e+07	0	7.364e-07	47.12	0.00519769	2	1151.52	-0.266555	55.1718	0	C1203	77.78	C1203	3.6	C1203	0.01
High	RKFDAIYKY	10	1	1	Q5C9Z4		0	9.84228e+06	0	5.47e-20	47.02	0.00809632	3	1203.65	-0.15051	38.3305	0	C1203	48.15	B1503	13	B1503	0.3
High	NAANIFERL	17	2	2	Q9Y6D6;Q9Y6D5		0	1.43832e+07	0	2.521e-08	46.91	0.00853215	2	1047.56	-0.41472	64.1276	0	C1203	77.78	A6802	36.5	A6802	0.4
High	YKILGGSVL	21	1	1	Q15843		0	3.1937e+07	0	0.0001326	46.86	0.00218427	2	949.571	-0.35132	62.5118	0	C1203	44.44	B1503	12.1	B1503	0.3
High	VKAPSSQTF	8	1	1	Q86TC9		0	1.00032e+07	0	0.0009242	46.81	0.00938959	2	964.509	-0.429531	35.0282	0	C1203	48.15	B1503	4.5	B1503	0.04
High	KQMEQISQF	27	2	2	P37802;Q9UI15		0	9.86775e+07	0	1.773e-12	46.79	0.00747598	2	1138.56	-0.725349	45.178	0	C1203	37.04	B1503	2.3	B1503	0.01
High	RKLFIGGLSF	28	4	4	Q32P51;P09651;P22626;P51991		0	8.18947e+07	0	6.863e-10	46.77	0.00200385	2	1137.68	-0.363431	67.561	0	C1203	37.14	B1503	6	B1503	0.08
High	FSMYKPITY	24	1	1	Q68CL5		0	3.39682e+07	0	2.607e-06	46.69	0.00868085	2	1149.57	0.165084	63.6046	0	C1203	81.48	C1203	5.1	C1203	0.01
High	KAFDFPSSF	19	1	1	Q7L945		0	1.88473e+07	0	8.447e-12	46.63	0.00755991	2	1045.5	-0.13812	69.51	0	C1203	77.78	B1503	3.2	C1203	0.01
High	GKVGFQSFF	18	1	1	P60903		0	1.73814e+07	0	5.25e-05	46.59	0.00758601	2	1016.52	-0.334849	69.419	0	C1203	33.33	B1503	24.8	B1503	0.6
High	TTVEIFNKL	78	1	1	Q96QK1		0	3.59237e+08	0	0.002947	46.56	0.00483553	2	1064.6	-0.688815	63.7915	0	C1203	70.37	A6802	8.9	A6802	0.06
High	ETIPSEIQVFV	34	1	1	Q15646		0	1.14853e+08	0	7.515e-14	46.49	0.00885885	2	1261.67	-0.17229	91.4059	0		0	A6802	12.4	A6802	0.1
High	DVTQIVEIL	4	1	1	Q86XP3		0	1.37832e+07	0	0.0001475	46.47	0.00741983	2	1029.58	-0.367441	100.109	0	C1203	40.74	A6802	406.7	A6802	1.9
High	FSYAFPKAV	11	2	2	O60669;O15427		0	1.13305e+07	0	8.835e-17	46.37	0.00853727	2	1029.54	-0.0976146	63.7862	0	C1203	81.48	C1203	3.4	C1203	0.01
High	ASYPELRLF	38	1	1	O75718		0	6.11643e+07	0	1.478e-13	46.35	0.00831249	2	1095.58	-0.279202	75.45	0	C1203	77.78	B1503	26.2	C1203	0.4
High	SAYAQIVQF	27	1	1	Q9Y4W6		0	5.62858e+07	0	0.0001024	46.34	0.00940012	2	1026.52	-0.537111	75.7151	0	C1203	77.78	B1503	9	C1203	0.09
High	FAMPYFIQV	23	1	1	Q00610		0	4.17511e+07	0	2.291e-09	46.3	0.0090581	2	1115.56	-0.187888	100.701	0	C1203	88.89	C1203	5.8	C1203	0.01
High	KLFPGSPAIY	18	7	7	P49792;P0DJD0;P0DJD1;A6NKT7;Q7Z3J3;Q99666;O14715		0	2.9906e+07	0	0.0001516	46.21	0.00830122	2	1092.61	-0.482638	63.851	0	C1203	51.43	B1503	9.2	B1503	0.17
High	DTFYVQVLV	50	1	1	Q5BJD5		0	4.85839e+07	0	4.216e-05	46.17	0.00765218	2	1083.57	-0.273501	96.1617	0	C1203	74.07	A6802	4.7	A6802	0.02
High	SAIDRIFTL	40	1	1	Q86TU7		0	1.00845e+08	0	0.002947	46.15	0.00656277	2	1035.58	-0.540787	76.8674	0	C1203	85.19	C1203	10.1	C1203	0.03
High	KKYGPKGYGY	11	2	2	P21291;Q16527		0	4.38117e+06	0	0.002242	46.09	0.00992389	2	1160.61	-0.403841	25.5312	0	C1203	42.86	B1503	53.5	B1503	1.2
High	DASPVTNNTI	10	1	1	O15164		0	1.62358e+07	0	4.678e-05	46.01	0.00909592	2	1031.5	-0.362289	50.1759	0	C1203	45.71	A6802	308.3	A6802	1.6
High	TTYEGIFKTL	27	1	1	Q8WWM7		0	2.23996e+07	0	2.023e-08	45.97	0.00928758	2	1172.62	-0.314625	69.5854	0	C1203	54.29	A6802	55.7	A6802	0.5
High	KKHSQFIGY	55	4	4	Q58FF7;Q58FG0;P07900;P08238		0	1.23357e+08	0	4.672e-13	45.9	0.00819057	2	1107.59	-0.707571	28.2743	0	C1203	44.44	B1503	11.3	B1503	0.25
High	RASFIFISV	6	1	1	Q8NBI5		0	1.44889e+07	0	0.0007661	45.87	0.00565136	2	1039.59	-0.575411	78.0225	0	C1203	81.48	A6802	76.5	C1203	0.5
High	VKYIQQENF	17	1	1	Q6PJF5		0	2.21183e+07	0	1.428e-14	45.86	0.0104558	2	1168.6	-0.0636028	47.9965	0	C1203	37.04	B1503	30.8	B1503	0.8
High	SAYEIIRDY	25	1	1	O60287		0	4.56874e+07	0	7.593e-12	45.83	0.0096663	2	1129.55	-0.887166	58.3692	0	C1203	88.89	C1203	16.7	C1203	0.06
High	RMNPNSPSITY	14	1	1	P84090		0	1.56241e+07	0	3.419e-14	45.69	0.0084736	2	1279.61	-0.635227	45.9007	0		0	B1503	22.1	B1503	0.6
High	FAYEGPMYL	9	1	1	Q96MT1		0	1.44042e+07	0	0.002583	45.66	0.00638771	2	1090.49	0.0654539	84.549	0	C1203	88.89	C1203	2.1	C1203	0.01
High	RVFPYSVFY	60	1	1	O15118		0	5.19868e+08	0	6.226e-15	45.6	0.0102251	2	1177.6	-0.232621	76.4354	0	C1203	51.85	B1503	7.9	C1203	0.09
High	AKWLQDEMF	16	1	1	Q14008		0	1.57647e+07	0	1.127e-09	45.45	0.0109023	2	1167.55	-0.0263222	69.6919	0	C1203	33.33	B1503	139.7	B1503	2.5
High	KKGPSGYGF	24	1	1	O14745		0	4.73924e+07	0	0.0004193	45.38	0.0112142	2	940.488	-0.622609	29.3596	0	C1203	37.04	B1503	50.9	B1503	1.2
High	DTFVHVTDL	22	1	1	P62263		0	3.34289e+07	0	1.28e-05	45.38	0.0138073	2	1046.51	-0.733228	66.8375	0	C1203	74.07	A6802	288.5	A6802	1.6
High	EAIDFIDSI	20	1	1	P28562		0	2.50691e+07	0	1.694e-07	45.33	0.00965583	2	1022.5	-0.462225	91.2666	0	C1203	74.07	A6802	9.3	A6802	0.07
High	GKIQFGYVY	34	1	1	Q969M3		0	6.95998e+07	0	0.0004098	45.32	0.0120899	2	1074.56	-1.31114	60.6479	0	C1203	40.74	B1503	8.1	B1503	0.15
High	YNFEKPVVM	23	1	1	O43929		0	2.95328e+07	0	0.0001134	45.32	0.0110691	2	1126.56	-0.508973	59.7566	0	C1203	51.85	B1503	28	C1203	0.15
High	AKNPSWASITY	8	2	2	Q8N6H7;Q9NP61		0	8.80118e+06	0	5.167e-16	45.3	0.0117842	2	1237.62	0.148825	59.2141	0		0	B1503	110.4	B1503	2
High	AQVPFEQIL	43	1	1	Q99828		0	3.71156e+08	0	0.0004746	45.26	0.0155404	2	1044.57	-0.0344695	84.5448	0	C1203	48.15	B1503	26.9	B1503	0.7
High	FLYPFPLAL	8	1	1	Q5BJD5		0	7.48877e+07	0	3.907e-05	45.16	0.00618113	2	1080.61	-0.254368	107.347	0	C1203	59.26	C1203	4.7	C1203	0.01
High	FMVSQVLF	16	1	1	P46597		0	1.46262e+07	0	2.509e-06	45.12	0.00976199	2	970.507	-0.0637856	97.2022	0	C1203	36.67	B1503	43.4	B1503	1
High	EIVQFFSGL	20	3	3	P31943;P55795;P52597		0	14232782	0	0.000723	45.12	0.0117122	2	1039.55	-0.563338	96.4173	0	C1203	37.04	A6802	15.1	A6802	0.15
High	KLVDFVIHF	15	1	1	P59998		0	1.70048e+07	0	6.425e-11	45.11	0.00881175	2	1117.64	0.380658	75.9904	0	C1203	40.74	B1503	15.8	B1503	0.4
High	YAYDGKDYIAL	44	16	16	P01892;P30447;P05534;P10316;P01889;P30460;Q04826;P30479;P30480;P30486;P18464;P30490;P30498;Q31610;P30499;P04222		0	2.38999e+08	0	5.223e-18	45.11	0.0117917	2	1291.62	-0.181511	66.4262	0		0	C1203	280.6	C1203	1.1
High	EVYGSLPAFL	35	1	1	Q01650		0	2.41325e+08	0	1.329e-08	45.1	0.0110339	2	1095.57	-0.725319	93.8531	0	C1203	40	A6802	19	A6802	0.17
High	LVASVRVPA	15	1	1	P42126		0	3.45893e+07	0	0.002947	45.03	0.00271026	2	911.567	-0.761706	46.0971	0	C1203	11.11	A6802	29.4	A6802	0.3
High	VTTDIQVKV	30	1	1	O00267		0	1.1756e+08	0	0.001971	45.01	0.00700253	2	1002.58	-1.07175	49.3482	0	C1203	77.78	A6802	34.4	A6802	0.4
High	SAYDNVNKV	15	1	1	P28482		0	1.45271e+07	0	0.0001117	44.99	0.0119081	2	1009.49	-0.31286	34.4684	0	C1203	85.19	C1203	11.1	C1203	0.03
High	KLFLTGESY	10	1	1	P10619		0	2.01771e+07	0	0.00016	44.99	0.0111775	2	1057.56	-0.141162	57.173	0	C1203	40.74	B1503	6.4	B1503	0.09
High	GKYASIILF	26	1	1	Q8TCB0		0	1.38399e+08	0	0.000384	44.97	0.00619645	2	1011.59	-0.233824	73.9732	0	C1203	40.74	B1503	5.6	B1503	0.07
High	GQFLVKSGY	10	1	1	Q9NZI8		0	2.86965e+07	0	2.402e-07	44.96	0.0114401	2	998.53	-0.576287	47.1681	0	C1203	40.74	B1503	9.9	B1503	0.2
High	RKFPAGKVPAF	59	1	1	P26641		0	8.44894e+07	0	1.744e-15	44.87	0.00536653	3	1217.71	-0.362848	40.6807	0		0	B1503	24	B1503	0.6
High	SQLVAGVAF	14	1	1	Q99832		0	1.47549e+07	0	0.002127	44.78	0.0150745	2	891.493	-0.519067	74.1347	0	C1203	33.33	B1503	3.3	B1503	0.02
High	RQQQSQTAY	16	2	2	Q99613;B5ME19		0	8.87602e+06	0	5.591e-15	44.71	0.0124949	2	1109.53	-0.492808	20.2137	0	C1203	37.04	B1503	3.1	B1503	0.01
High	HTVWIPWNV	15	1	1	Q9P273		0	6.34991e+07	0	1.991e-11	44.66	0.0115606	2	1151.6	-0.233125	80.9298	0	C1203	70.37	A6802	3.7	A6802	0.01
High	SQFGTVTRF	47	1	1	Q9BYG3		0	4.56028e+08	0	3.901e-08	44.64	0.0124832	2	1042.53	-0.700135	51.6558	0	C1203	40.74	B1503	2.5	B1503	0.01
High	GKAFFLSSY	18	1	1	O75123		0	1.77933e+07	0	1.377e-08	44.62	0.0168603	2	1019.52	-0.110298	63.5699	0	C1203	40.74	B1503	7.4	B1503	0.12
High	RHWGGQADF	6	1	1	Q6PJG6		0	1.53844e+07	0	6.118e-10	44.55	0.00882667	2	1073.49	-0.515249	36.2886	0	C1203	33.33	B1503	56.4	B1503	1.3
High	DTTVIIWQV	12	1	1	Q9H7D7		0	3.2219e+07	0	0.00119	44.52	0.0181854	2	1074.58	-0.65915	95.6669	0	C1203	70.37	A6802	16.5	A6802	0.15
High	LSAPIHTQM	23	1	1	Q8NG31		0	4.05781e+07	0	0.000106	44.45	0.0112684	2	997.513	-0.279768	46.1495	0	C1203	70.37	C1203	22	C1203	0.09
High	GKITDFIKF	17	1	1	P62701		0	1.7792e+07	0	9.944e-05	44.4	0.00838166	2	1068.61	-0.617068	66.6676	0	C1203	33.33	B1503	26.5	B1503	0.7
High	KKVVKETSY	9	1	1	Q9NZJ7		0	1.8756e+06	0	9.783e-09	44.4	0.00586371	2	1081.62	-0.273451	18.2146	0	C1203	37.04	B1503	31.5	B1503	0.8
High	EIIDFFLGA	41	1	1	P15880		0	1.2441e+08	0	8.986e-06	44.39	0.0122184	2	1024.53	-0.189025	105.478	0	C1203	7.41	A6802	8.1	A6802	0.05
High	MAYSNLLRA	3	1	1	P37108		0	9.28177e+06	0	9.526e-08	44.36	0.00972892	2	1038.54	-1.20876	57.7295	0	C1203	48.15	C1203	17.6	C1203	0.06
High	DTFSVQVLV	36	1	1	Q96L33		0	7.13308e+07	0	0.001211	44.34	0.012717	2	1007.54	-0.436174	90.7226	0	C1203	77.78	A6802	5.2	A6802	0.02
High	GKFGGDFLVY	36	1	1	Q9BSV6		0	1.87607e+08	0	2.937e-08	44.27	0.0147082	2	1102.56	-0.342129	71.224	0	C1203	54.29	B1503	9.5	B1503	0.2
High	VTYVPVTTF	26	1	1	P62899		0	4.32062e+07	0	3.386e-05	44.24	0.0101898	2	1026.55	-0.540522	76.7442	0	C1203	74.07	B1503	14.3	C1203	0.3
High	QAFPLIIKL	21	1	1	Q14CZ7		0	3.23448e+07	0	0.000456	44.21	0.00303452	2	1042.67	-0.389729	83.7967	0	C1203	92.59	C1203	130.7	C1203	0.6
High	DIFRYQDEV	10	1	1	Q13283		0	1.11628e+07	0	6.041e-11	44.16	0.0120369	2	1184.56	-0.305914	64.6916	0	C1203	44.44	A6802	75.7	A6802	0.7
High	LKPGMVVTF	10	2	2	P68104;Q5VTE0		0	3.61808e+07	0	0.0006218	44.04	0.00996596	2	991.564	-0.615082	62.077	0	C1203	44.44	B1503	58.1	B1503	1.3
High	AQRQDIAFAY	20	1	1	P07355		0	3.35855e+07	0	7.574e-06	44.01	0.0144022	2	1182.59	-0.399142	53.2393	0	C1203	31.43	B1503	8.4	B1503	0.15
High	VKVPTTLAEY	8	2	2	P49427;Q712K3		0	7.87621e+06	0	5.741e-13	43.99	0.0105981	2	1120.62	-0.405178	57.1176	0	C1203	34.29	B1503	16.3	B1503	0.4
High	MSYAEVMRL	1	1	1	O43681		0	3.598e+06	0	9.164e-11	43.91	0.0132114	2	1099.53	0.103853	67.2069	0	C1203	74.07	C1203	11.7	C1203	0.03
High	AMNPTNTVF	44	1	1	P11142		0	2.71794e+08	0	0.0004056	43.85	0.0152971	2	994.466	-0.671244	61.1438	0	C1203	44.44	B1503	2.8	B1503	0.01
High	HGIDPTGTY	35	3	3	P04350;P68371;P07437		0	1.18968e+08	0	0.0001563	43.84	0.0143307	2	960.442	-0.609491	40.4839	0	C1203	44.44	B1503	42.3	C1203	0.4
High	SGYYRVSSY	5	1	1	Q9UNQ0		0	1.74509e+07	0	2.909e-07	43.83	0.0126249	2	1081.49	-0.99796	41.9495	0	C1203	44.44	C1203	23	C1203	0.09
High	YQFTGIKKY	38	1	1	Q96IX5		0	1.1574e+08	0	1.988e-14	43.83	0.0173983	2	1147.61	-1.25	43.3157	0	C1203	51.85	B1503	2.6	B1503	0.01
High	NVTWVIVNL	3	1	1	O00505		0	6.17089e+06	0	1.55e-05	43.82	0.0151064	2	1057.6	-0.0470828	96.8814	0	C1203	44.44	A6802	22.4	A6802	0.25
High	GKLPAGGVLY	24	1	1	P48634		0	4.05014e+07	0	0.0001426	43.77	0.013172	2	974.566	-0.614105	51.5909	0	C1203	34.29	B1503	41.8	B1503	1
High	YAYFNFPEL	18	1	1	Q8IY21		0	1.01663e+07	0	7.531e-08	43.73	0.0155922	2	1163.54	0.321427	98.5616	0	C1203	85.19	C1203	5	C1203	0.01
High	LAKAWPTVL	16	1	1	P31040		0	2.17341e+07	0	0.0005242	43.62	0.00788419	2	998.602	-0.917992	64.0691	0	C1203	81.48	C1203	35.2	C1203	0.15
High	TTIDVRTTF	28	1	1	Q8IY21		0	8.50141e+07	0	1.561e-10	43.57	0.0140302	2	1053.56	-0.462116	55.3052	0	C1203	66.67	C1203	46.1	C1203	0.25
High	KSKDFVQVM	24	1	1	P78527		0	4.80803e+07	0	4.829e-07	43.51	0.0144861	2	1081.57	-0.346709	38.3996	0	C1203	70.37	B1503	67.8	C1203	0.4
High	EVFRIGNVEI	15	1	1	P15927		0	1.96299e+07	0	9.238e-09	43.39	0.017627	2	1175.64	0.149827	77.8527	0	C1203	20	A6802	27.3	A6802	0.25
High	DVIDIMENL	4	1	1	P41279		0	1.77167e+06	0	0.0001686	43.31	0.0163587	2	1061.52	-0.0406534	103.478	0	C1203	40.74	A6802	18.9	A6802	0.17
High	KKVGIVGKY	8	1	1	P61513		0	4.04829e+06	0	0.001061	43.27	0.00142471	2	991.629	-0.544765	23.5091	0	C1203	44.44	B1503	46.2	B1503	1.1
High	RLWEQLVHF	36	1	1	Q5JS54		0	9.27157e+07	0	1.795e-07	43.27	0.0137337	3	1227.66	-0.362341	71.7768	0	C1203	37.04	B1503	12.6	B1503	0.3
High	KAYFDVKEY	18	1	1	Q9UJX2		0	1.92543e+07	0	4.652e-13	43.26	0.020209	2	1162.58	-0.422443	46.4331	0	C1203	88.89	B1503	16.5	C1203	0.25
High	KLYQSIIGY	22	1	1	Q9NSV4		0	3.76702e+07	0	7.881e-09	43.12	0.0147355	2	1084.6	-1.51477	60.6198	0	C1203	48.15	B1503	7.6	B1503	0.12
High	YQSPHSGSF	15	1	1	P32004		0	1.10983e+07	0	6.089e-09	43.04	0.00930862	2	1009.44	-0.459715	33.9749	0	C1203	44.44	B1503	2	B1503	0.01
High	KQFPEVIKY	43	1	1	Q9UIF9		0	1.64804e+08	0	5.816e-07	43.04	0.0130927	2	1151.64	-0.882425	48.3703	0	C1203	55.56	B1503	3.6	B1503	0.03
High	YAYDGKDYIA	37	16	16	P01892;P30447;P05534;P10316;P01889;P30460;Q04826;P30479;P30480;P30486;P18464;P30490;P30498;Q31610;P30499;P04222		0	1.64019e+08	0	7e-07	42.99	0.014799	2	1178.54	-0.644164	51.1864	0	C1203	45.71	A6802	498.4	C1203	2
High	IVTEIISEI	20	1	1	Q9BPX3		0	5.97465e+07	0	8.03e-05	42.98	0.0137053	2	1016.59	-0.42161	83.6309	0	C1203	40.74	C1203	62.4	C1203	0.3
High	FSFPGELLm	100	2	2	P43003;P48664	M9(Oxidation)	0	2.82922e+07	0	0.002947	42.97	0.0158211	2	1056.51	-0.441932	91.2105	0	C1203	77.78	C1203	6.2	C1203	0.01
High	AKVVDKSEY	12	1	1	P42695		0	9.54084e+06	0	1.938e-06	42.88	0.0146866	2	1038.55	-1.02208	22.3621	0	C1203	44.44	B1503	98.5	B1503	1.8
High	KQTQTFTTY	23	3	3	P54652;P17066;P11142		0	2.56014e+07	0	6.402e-14	42.88	0.0233012	2	1117.55	-0.778514	36.4158	0	C1203	40.74	B1503	2.2	B1503	0.01
High	EVFDKTYQF	34	1	1	Q96EU6		0	1.05762e+08	0	5.394e-06	42.88	0.0176801	2	1176.56	-0.539835	60.8001	0	C1203	37.04	A6802	307.5	A6802	1.6
High	YASENVNKL	4	2	2	P62820;Q9H0U4		0	9.20929e+06	0	2.053e-06	42.87	0.0208142	2	1037.53	-0.293771	35.8346	0	C1203	88.89	C1203	14.1	C1203	0.04
High	RQQPPSTTTF	28	1	1	A3KN83		0	3.35489e+07	0	2.01e-12	42.65	0.0223357	2	1162.58	-0.542795	35.9849	0	C1203	37.14	B1503	4.8	B1503	0.05
High	HQQPPSQQY	31	1	1	Q15532		0	2.6418e+07	0	9.05e-15	42.63	0.014921	2	1112.51	-0.0655103	26.4742	0	C1203	44.44	B1503	6.9	B1503	0.12
High	EVFPDQFIHL	56	1	1	P07686		0	1.89488e+08	0	4.282e-10	42.62	0.020297	2	1244.63	-0.606347	84.6991	0	C1203	40	A6802	43.9	A6802	0.4
High	GQYSTGKTTF	20	3	3	Q9H4M9;Q9NZN3;Q9H223		0	1.70116e+07	0	1.552e-08	42.6	0.0222619	2	1089.52	-0.64979	35.7582	0	C1203	31.43	B1503	4.1	B1503	0.03
High	YAFAHILTV	16	1	1	O75204		0	2.73191e+07	0	1.971e-07	42.45	0.0218951	2	1034.57	-0.854138	72.3453	0	C1203	92.59	C1203	2.4	C1203	0.01
High	DTFSGIGKKFGL	9	1	1	Q15847		0	1.31275e+07	0	1.372e-06	42.4	0.0179422	2	1269.68	0.331106	68.9589	0		0	A6802	198.2	A6802	1.2
High	GKLKQFDAY	16	1	1	Q9Y282		0	3.28293e+07	0	2.604e-06	42.39	0.0212048	2	1069.57	-0.719142	35.9914	0	C1203	37.04	B1503	45.3	B1503	1.1
High	GKPPFEANTY	28	1	1	O14965		0	8.28859e+07	0	1.506e-07	42.24	0.0252934	2	1123.54	-1.06297	43.6126	0	C1203	31.43	B1503	372	B1503	4.5
High	IKADHVSTY	16	1	1	P20036		0	12874617	0	0.002947	42.21	0.0313542	2	1033.53	-0.367587	27.5114	0	C1203	51.85	B1503	3.3	B1503	0.02
High	YTFGRIVIY	14	1	1	Q9UBB9		0	2.9306e+07	0	2.338e-08	42.19	0.0207034	2	1131.62	-0.264166	74.2079	0	C1203	85.19	C1203	5.7	C1203	0.01
High	FVNDIFERIA	23	14	14	P33778;P62807;P58876;Q93079;P06899;O60814;Q99880;Q99879;Q99877;P23527;Q16778;Q5QNW6;Q8N257;P57053		0	2.42645e+07	0	2.414e-13	42.11	0.0224878	2	1223.64	0.0441895	76.2084	0	C1203	14.29	A6802	212.5	A6802	1.3
High	SVFTFVAEV	26	1	1	Q7Z429		0	4.39679e+07	0	0.0006739	42.1	0.0205696	2	998.519	-0.158897	91.4868	0	C1203	48.15	A6802	6.7	A6802	0.04
High	ETFAFQAEI	29	5	5	Q58FF8;Q58FF7;Q14568;P07900;P08238		0	1.75206e+08	0	2.579e-06	42.09	0.0246341	2	1055.5	-0.124339	81.4668	0	C1203	66.67	A6802	3	A6802	0.01
High	TKQGWSSAY	7	2	2	Q7Z7E8;Q8WVN8		0	9.17957e+06	0	1.837e-08	41.98	0.0203789	2	1027.48	-0.534366	36.5853	0	C1203	40.74	B1503	16	B1503	0.4
High	FKFVEQQSY	4	1	1	Q99590		0	9.37782e+06	0	1.333e-13	41.89	0.0281992	2	1175.57	-0.0115553	53.9845	0	C1203	44.44	B1503	6.4	B1503	0.09
High	STYIKKIGY	11	2	2	P68104;Q5VTE0		0	9.42738e+06	0	1.624e-09	41.87	0.0273412	2	1072.6	-0.27983	37.4007	0	C1203	74.07	B1503	514.4	C1203	2
High	GKAPLNVQF	19	1	1	O75369		0	2.9992e+07	0	0.002947	41.7	0.0274388	2	973.546	-0.161248	53.6264	0	C1203	44.44	B1503	34.9	B1503	0.9
High	VKNPDGGSY	21	1	1	Q15646		0	1.38709e+07	0	2.938e-05	41.65	0.0275274	2	936.442	-0.570613	25.48	0	C1203	48.15	B1503	21.6	B1503	0.6
High	FASHVSPEV	23	1	1	Q9NP61		0	2.03953e+08	0	0.0009785	41.58	0.026258	2	972.478	-1.00222	40.6668	0	C1203	85.19	C1203	13.7	C1203	0.04
High	GKVKSGGTY	9	1	1	P55017		0	1.88941e+07	0	0.001903	41.56	0.0231045	2	896.483	-0.353977	16.3902	0	C1203	40.74	B1503	21.1	B1503	0.6
High	RKPDQVFQSY	13	1	1	Q96K76		0	1.33334e+07	0	7.705e-08	41.44	0.0272044	2	1267.64	-0.199982	38.4162	0	C1203	40	B1503	132.6	B1503	2.5
High	KKYGVDLIRY	2	1	1	Q6UXN9		0	9.1691e+06	0	2.48e-05	41.42	0.0136578	3	1254.72	-0.314312	44.9041	0	C1203	34.29	B1503	23.2	B1503	0.6
High	KKFVTQQQY	6	1	1	Q9Y4E5		0	4.19717e+06	0	7.41e-10	41.36	0.0232904	2	1169.63	-0.388436	27.1551	0	C1203	40.74	B1503	17.9	B1503	0.5
High	KTPDFILQV	28	1	1	Q9Y2V0		0	5.44723e+07	0	0.0007076	41.34	0.0267216	2	1060.6	0.264194	70.3121	0	C1203	77.78	A6802	174.3	C1203	0.9
High	TVAQIKATV	22	1	1	Q8IXM2		0	1.8786e+07	0	0.001926	41.26	0.0166019	2	930.562	-0.223729	39.5298	0	C1203	44.44	A6802	10.7	A6802	0.08
High	VKYIQTDGY	3	1	1	Q8TAS1		0	4.98785e+06	0	5.128e-08	41.24	0.0314968	2	1086.55	-1.07087	45.2329	0	C1203	44.44	B1503	30.9	B1503	0.8
High	ETIMNQEKL	15	1	1	P20290		0	2.69722e+07	0	1.542e-05	41.18	0.0360501	2	1105.56	-0.448507	43.788	0	C1203	66.67	A6802	227	A6802	1.4
High	TAFSRLILI	16	1	1	Q6P2Q9		0	1.27642e+07	0	0.00204	41.03	0.00569951	2	1033.64	-0.415089	78.664	0	C1203	77.78	C1203	21.7	C1203	0.08
High	ALMPPFTAF	11	1	1	P51955		0	1.34478e+07	0	9.709e-05	41	0.0328733	2	994.507	0.418677	95.7156	0	C1203	40.74	B1503	3	B1503	0.01
High	SKLQNNNVY	17	1	1	P63010		0	1.60961e+07	0	1.572e-07	40.96	0.0319348	2	1079.55	-0.565441	29.6626	0	C1203	40.74	B1503	16.3	B1503	0.4
High	KQFQSPSTL	18	1	1	Q8NAP3		0	1.43912e+07	0	0.002947	40.92	0.036741	2	1035.55	-0.16491	38.5981	0	C1203	48.15	B1503	3.6	B1503	0.03
High	GQIPQILYY	17	1	1	O75592		0	1.02751e+07	0	0.00195	40.91	0.0326858	2	1094.59	-0.25137	83.1593	0	C1203	51.85	B1503	6.3	B1503	0.09
High	GKNPDEVSY	20	1	1	O95391		0	4.29185e+07	0	0.002947	40.9	0.0315988	2	1008.46	-0.723167	31.45	0	C1203	48.15	B1503	70	B1503	1.5
High	TTIEAIHGL	34	1	1	Q92905		0	5.20193e+07	0	0.002947	40.84	0.0230223	2	954.525	-0.140501	53.65	0	C1203	74.07	A6802	4.6	A6802	0.01
High	QQFLIQQQY	6	1	1	Q6Y7W6		0	1.02603e+07	0	1.694e-11	40.84	0.0320466	2	1195.61	-0.185795	67.6189	0	C1203	40.74	B1503	9.2	B1503	0.17
High	IKDNVVIVY	17	1	1	Q9Y2T2		0	4.73116e+07	0	2.461e-05	40.82	0.0159337	2	1062.62	-0.0950537	56.1759	0	C1203	48.15	B1503	44.4	B1503	1.1
High	GQTTTYLTY	16	1	1	P11388		0	3.93099e+07	0	0.001002	40.77	0.0297993	2	1047.5	-0.938126	58.6786	0	C1203	44.44	B1503	3.8	B1503	0.03
High	RKLPEKTQTF	23	1	1	Q96SY0		0	1.88158e+07	0	1.708e-08	40.7	0.0189931	3	1247.71	0.0454667	26.0775	0	C1203	34.29	B1503	39.5	B1503	1
High	YKAPITNEF	6	1	1	Q9Y4X0		0	7.13174e+06	0	2.514e-08	40.63	0.036307	2	1082.55	-0.598873	51.5744	0	C1203	48.15	B1503	7.7	B1503	0.15
High	QKYAGKDGY	10	1	1	P31949		0	7.63211e+06	0	3.026e-05	40.58	0.03153	2	1029.5	-0.439031	21.4121	0	C1203	40.74	B1503	78.4	B1503	1.6
High	EVAALIRSL	18	1	1	Q6P2Q9		0	3.52928e+07	0	0.002947	40.55	0.0215372	2	971.588	-0.475552	66.1488	0	C1203	48.15	A6802	24.8	A6802	0.25
High	KASEWVQQV	14	1	1	P49588		0	1.75932e+07	0	2.595e-07	40.55	0.0411274	2	1074.56	-0.996696	44.6871	0	C1203	85.19	C1203	99.9	C1203	0.5
High	HVVDFFNRV	33	1	1	Q96BX8		0	5.61663e+07	0	0.0006182	40.53	0.0401311	2	1132.59	-0.287979	56.1889	0	C1203	40.74	A6802	4.3	A6802	0.01
High	VQGPVGTDF	3	1	1	O43670		0	1.30522e+07	0	0.001265	40.52	0.0548617	2	919.452	-0.0754845	58.6624	0	C1203	40.74	B1503	10.4	B1503	0.25
High	RQYAKDIGF	23	1	1	P62273		0	3.87875e+07	0	5.035e-06	40.47	0.0289107	2	1097.57	-0.965581	39.8665	0	C1203	37.04	B1503	2.6	B1503	0.01
High	AAFEKALEV	21	1	1	Q13325		0	3.71819e+07	0	0.002947	40.46	0.0435492	2	977.53	0.165526	53.9742	0	C1203	92.59	C1203	13.1	C1203	0.04
High	AKQDVVLNY	5	1	1	Q15029		0	2.56697e+07	0	0.0001416	40.44	0.0370316	2	1049.56	-0.651751	45.7173	0	C1203	51.85	B1503	28.2	B1503	0.7
High	TVTSVLEYL	19	1	1	O14893		0	4.29341e+07	0	0.0001107	40.42	0.0254916	2	1024.56	-0.171292	90.6788	0	C1203	40.74	A6802	19.5	A6802	0.17
High	DVAPVSFFL	15	1	1	O14791		0	5.09482e+06	0	0.0001486	40.34	0.037797	2	994.524	-0.551978	105.068	0	C1203	48.15	A6802	4.7	A6802	0.01
High	NVIDNPWGV	16	1	1	Q5TGY1		0	7.34073e+06	0	0.002594	40.29	0.0348158	2	1013.51	-0.0679014	79.6772	0	C1203	44.44	A6802	7.4	A6802	0.05
High	SAYARLIDY	17	1	1	P34897		0	2.5424e+07	0	3.138e-08	40.26	0.0378593	2	1071.55	-0.491796	58.3604	0	C1203	81.48	B1503	12.7	C1203	0.05
High	YIKDFFEQM	3	1	1	Q5U649		0	2.92009e+07	0	5.279e-14	40.2	0.0306314	2	1220.57	-0.0589427	72.939	0	C1203	37.04	C1203	55.3	C1203	0.25
High	RAFDQGADAIY	5	1	1	Q9UDW1		0	2.79527e+07	0	1.924e-06	40.2	0.0293326	2	1226.58	-0.660429	51.8047	0		0	B1503	65.2	B1503	1.4
High	LHLGYLPNQLFRTF	6	1	1	Q92499		0	7.08875e+06	0	1.376e-20	40.2	0.0395558	3	1718.94	-0.440077	83.3813	0
High	SKASQFTGY	8	1	1	O94966		0	9.29282e+06	0	2.375e-06	40.19	0.0368998	2	988.473	-0.334056	35.5081	0	C1203	44.44	B1503	13.5	B1503	0.3
High	YSFGHPSSV	22	1	1	P31327		0	3.68373e+07	0	1.518e-06	40.18	0.028854	2	980.446	-0.922681	43.1244	0	C1203	81.48	C1203	2.9	C1203	0.01
High	AQYENPPHIY	10	2	2	Q12965;O00160		0	1.57846e+07	0	7.219e-13	40.17	0.0308774	2	1231.57	0.0284585	48.9275	0	C1203	40	B1503	5.7	B1503	0.07
High	GKFGITSAF	1	1	1	Q9H015		0	7.92281e+06	0	0.002947	40.14	0.0368527	2	927.494	0.0275334	59.0723	0	C1203	37.04	B1503	4.3	B1503	0.04
High	DTFFRPLNV	26	1	1	Q13444		0	3.97175e+07	0	5.445e-08	40.14	0.0360829	2	1108.58	0.0357034	74.8815	0	C1203	77.78	A6802	19.7	A6802	0.17
High	GKLSEGVTISY	1	1	1	P05556		0	9.6271e+06	0	3.235e-05	40.13	0.0298238	2	1153.61	-0.158191	54.1692	0		0	B1503	446.1	B1503	4.5
High	SKTQVTVQY	6	2	2	Q00266;P31153		0	6.94343e+06	0	0.0007083	40.12	0.031089	2	1053.56	-0.327267	36.7406	0	C1203	40.74	B1503	38.6	B1503	0.9
High	GHYLGEFSITY	27	1	1	P62841		0	6.20121e+07	0	5.582e-18	40.02	0.0311811	2	1286.6	-0.324399	72.1884	0		0	B1503	127.4	B1503	2.5
High	NKYLTAEAF	2	1	1	Q16658		0	2.83714e+07	0	0.002947	40.01	0.0369498	2	1056.54	-0.821034	53.4491	0	C1203	33.33	B1503	15	B1503	0.4
High	MKIPTGQEY	16	1	1	Q13557		0	15599639	0	1.132e-06	40	0.042825	2	1066.52	-1.09767	47.3818	0	C1203	48.15	B1503	7.4	B1503	0.12
High	GKYGFSDPLTF	12	2	2	Q92569;P27986		0	1.13973e+07	0	2.55e-07	40	0.036195	2	1231.6	-0.296101	73.7511	0		0	B1503	51	B1503	1.2
High	YLGEFSITY	10	1	1	P62841		0	1.71252e+07	0	1.917e-05	39.96	0.039053	2	1092.52	-0.217449	84.4416	0	C1203	51.85	B1503	9.3	B1503	0.17
High	EVAGILEPVGL	11	1	1	O95229		0	3.14365e+07	0	0.002104	39.95	0.0175155	2	1096.62	-0.664032	88.698	0		0	A6802	41.9	A6802	0.4
High	DVSKIFQVV	12	1	1	Q5TF58		0	1.80274e+07	0	0.00203	39.92	0.0294424	2	1034.59	0.0590229	75.7931	0	C1203	44.44	A6802	44.3	A6802	0.4
High	YKIAFPYLY	8	1	1	Q6P2Q9		0	9.28773e+06	0	1.629e-09	39.92	0.0427605	2	1177.63	-0.0197945	81.1569	0	C1203	44.44	B1503	6.1	B1503	0.08
High	ITVSIIKEL	27	1	1	Q8TED0		0	5.2838e+07	0	0.002947	39.76	0.00560113	2	1015.64	-0.544002	70.0978	0	C1203	81.48	C1203	140.7	C1203	0.7
High	RKLDPPGGQFY	18	1	1	O95400		0	3.8944e+07	0	1.549e-11	39.74	0.0410345	2	1277.66	-0.674595	45.4012	0		0	B1503	443.7	B1503	4.5
High	DTTYINHVV	40	1	1	Q9UBR2		0	2.14094e+08	0	0.0004463	39.69	0.0543224	2	1061.53	-0.277709	51.4237	0	C1203	70.37	A6802	8.7	A6802	0.06
High	EVLDILTRL	30	1	1	O75955		0	3.03149e+07	0	6.591e-07	39.65	0.0221771	2	1071.64	-0.090171	85.3576	0	C1203	40.74	A6802	40.6	A6802	0.4
High	RAYQQSEAY	49	1	1	Q9P0W2		0	1.95169e+08	0	9.831e-12	39.51	0.0280923	2	1115.51	-0.973235	28.9445	0	C1203	77.78	B1503	4	B1503	0.03
High	FAADIISVL	11	1	1	Q13200		0	9.36023e+07	0	0.000549	39.42	0.031252	2	948.54	-0.283361	94.3626	0	C1203	92.59	C1203	3.3	C1203	0.01
High	VQFGANKSQY	16	1	1	Q7Z7E8		0	1.20948e+07	0	0.0001885	39.35	0.0407552	2	1141.56	-0.137652	37.9038	0	C1203	40	B1503	6.1	B1503	0.08
High	YTFESTIIY	12	1	1	Q4LDE5		0	2.91319e+07	0	1.035e-05	39.3	0.0415679	2	1136.55	-0.392936	81.9419	0	C1203	81.48	C1203	6.8	C1203	0.01
High	YLYGQTTTY	18	1	1	P11388		0	3.94771e+07	0	1.58e-11	39.29	0.0380367	2	1109.51	-0.239081	57.8016	0	C1203	51.85	B1503	3	B1503	0.01
High	RQFTSSSSI	3	1	1	Q04695		0	4.4118e+06	0	0.002947	39.23	0.0428284	2	1012.51	-0.34723	33.3541	0	C1203	33.33	B1503	4	B1503	0.03
High	YKVEYPIMY	24	1	1	O14880		0	3.47258e+07	0	0.002947	39.21	0.0456649	2	1205.59	-0.0159657	67.0516	0	C1203	51.85	B1503	7.7	B1503	0.12
High	ALCDIKQAY	17	1	1	P25789		0	2.95966e+07	0	0.002947	39.09	0.0478568	2	1024.51	-0.357554	50.8885	0	C1203	44.44	B1503	144	B1503	2.5
High	LQRLENTQY	15	1	1	Q96D70		0	12586165	0	1.78e-13	39.02	0.0510592	2	1164.6	-0.345101	38.9027	0	C1203	37.04	B1503	6.6	B1503	0.1
High	RKFYKGKKY	30	1	1	P42766		0	2.69518e+07	0	5.194e-11	39.02	0.0230515	3	1217.72	-0.029263	17.612	0	C1203	44.44	B1503	20.2	B1503	0.5
High	HSAEILAEI	4	1	1	Q6FI81		0	3.95826e+08	0	9.979e-05	39	0.0376922	2	982.52	-0.743375	58.5732	0	C1203	70.37	A6802	5.3	A6802	0.03
High	SVVELVNKL	19	1	1	Q9BQE5		0	2.45805e+07	0	0.000162	38.96	0.0271966	2	1000.6	-0.329947	64.3333	0	C1203	44.44	A6802	155.9	A6802	1.1
High	IKYDPSIGIY	6	1	1	P62913		0	1.08811e+07	0	6.485e-11	38.94	0.0369784	2	1168.62	-0.171066	63.8454	0	C1203	42.86	B1503	13.3	B1503	0.3
High	LAAPVISVL	17	1	1	O60337		0	3.28125e+07	0	0.001394	38.9	0.00812885	2	882.566	-0.376112	84.6622	0	C1203	92.59	C1203	8.2	C1203	0.01
High	EAAGIMENI	13	1	1	O60341		0	2.75462e+07	0	2.345e-05	38.89	0.0522815	2	947.45	-0.53368	64.8375	0	C1203	74.07	A6802	6.1	A6802	0.03
High	VQKAISTTF	4	1	1	Q8IZW8		0	1.30664e+07	0	0.0004198	38.86	0.030515	2	994.554	-2.824	41.2455	0	C1203	37.04	B1503	2.6	B1503	0.01
High	FVVDHVIKI	7	1	1	Q86UV5		0	1.01888e+07	0	5.177e-05	38.78	0.02258	2	1069.64	-0.743488	59.9871	0	C1203	44.44	C1203	17.2	C1203	0.06
High	WQKGIGEFF	20	1	1	Q15004		0	2.38155e+07	0	2.137e-08	38.71	0.0407257	2	1111.56	-0.864875	70.6582	0	C1203	33.33	B1503	12.9	B1503	0.3
High	YTFPGILKW	13	1	1	Q9H7D0		0	6.64048e+06	0	3.852e-06	38.7	0.0395044	2	1124.61	0.441201	84.7335	0	C1203	51.85	C1203	45.2	C1203	0.2
High	AQFETKKLY	28	1	1	O60613		0	6.76039e+07	0	5.817e-06	38.63	0.0458423	2	1127.61	-0.564897	37.7682	0	C1203	51.85	B1503	4.1	B1503	0.03
High	AAFDQWREW	1	1	1	Q16555		0	1.01498e+07	0	1.254e-08	38.62	0.0443403	2	1208.55	-0.00319185	72.5466	0	C1203	55.56	C1203	481.5	C1203	1.6
High	ISTPVIRTF	25	1	1	Q9NZB2		0	8.06002e+07	0	0.0001997	38.41	0.0283592	2	1033.6	-1.5835	59.7869	0	C1203	77.78	B1503	37.8	C1203	0.25
High	EAAAVFKTL	24	1	1	Q8IWZ6		0	2.55758e+07	0	0.002663	38.35	0.0476524	2	949.535	0.0912966	53.6314	0	C1203	85.19	A6802	38.7	A6802	0.4
High	KQPDNSPEY	37	1	1	Q9NX07		0	1.81637e+07	0	3.484e-08	38.34	0.0449923	2	1077.48	-0.314344	26.0208	0	C1203	44.44	B1503	27.2	B1503	0.7
High	TSVPELQIPL	3	1	1	Q96R09		0	2.6195e+07	0	0.00201	38.34	0.025376	2	1096.62	-0.645794	88.8367	0	C1203	54.29	A6802	364.9	A6802	1.8
High	NKIIDINYY	2	1	1	P23921		0	4.67997e+06	0	0.0001093	38.26	0.0548154	2	1155.6	-0.257636	62.0887	0	C1203	40.74	B1503	283	B1503	3.5
High	RAIDFSPYL	30	1	1	P17676		0	6.22195e+07	0	0.0006632	38.18	0.0581305	2	1081.57	-0.259705	70.5946	0	C1203	77.78	C1203	21.2	C1203	0.08
High	MPAFIFEHI	25	1	1	O00560		0	4.71774e+07	0	3.952e-05	38.17	0.0664106	2	1104.55	-0.319054	81.6545	0	C1203	33.33	A6802	21.7	A6802	0.2
High	KKIEKLEEY	17	1	1	O95786		0	1.08197e+07	0	8.725e-11	38.14	0.0321963	2	1179.66	0.0200086	26.568	0	C1203	44.44	B1503	30.6	B1503	0.8
High	SKLPSSIEY	19	1	1	Q15386		0	2.6224e+07	0	0.0001003	38.12	0.0514697	2	1023.54	-0.157533	48.3643	0	C1203	51.85	B1503	11.5	B1503	0.25
High	VAIVRPSIV	11	1	1	Q8WVX9		0	9.21405e+06	0	0.002947	38.08	0.00723524	2	953.614	-0.03872	55.0864	0	C1203	81.48	C1203	109.1	C1203	0.5
High	SAADGPRVF	3	1	1	Q9Y285		0	4.90859e+06	0	0.002947	38.07	0.0680121	2	919.463	-0.816045	40.679	0	C1203	85.19	B1503	36.3	C1203	0.25
High	YQKQPKIGY	6	1	1	Q68E01		0	9.45846e+06	0	8.266e-13	37.93	0.0503407	2	1124.61	-0.416768	31.7404	0	C1203	44.44	B1503	9.2	B1503	0.17
High	LANGEVRIY	3	1	1	Q8NFJ9		0	6.90976e+06	0	2.815e-07	37.87	0.0636564	2	1034.56	-0.0459037	47.4299	0	C1203	85.19	B1503	69.1	C1203	0.7
High	QLVDIIEKV	21	1	1	P61289		0	6.23905e+07	0	2.396e-05	37.87	0.0302115	2	1056.63	-1.09738	70.8893	0	C1203	44.44	A6802	145.4	A6802	1
High	YKFDFPVSY	9	1	1	Q9NXE4		0	6.66186e+06	0	2.442e-09	37.83	0.0669072	2	1165.56	-1.06209	75.4566	0	C1203	55.56	B1503	3	B1503	0.01
High	YVFDGKPPQL	21	1	1	P39748		0	1.97844e+07	0	0.002947	37.8	0.0742499	2	1163.61	-0.556014	64.6361	0	C1203	57.14	C1203	243.1	C1203	1
High	KQIESKTAF	16	1	1	P10599		0	1.06066e+07	0	1.473e-07	37.79	0.0474655	2	1051.58	-0.335536	25.091	0	C1203	33.33	B1503	2.3	B1503	0.01
High	RSSPPGHYY	34	1	1	Q9NX40		0	2.03761e+07	0	3.773e-08	37.71	0.0623516	2	1063.49	-0.735993	24.8089	0	C1203	77.78	B1503	28.9	C1203	0.5
High	RSLQENIAY	7	1	1	Q03518		0	1.81206e+07	0	0.0006087	37.7	0.0691949	2	1093.56	-0.813452	44.6613	0	C1203	70.37	B1503	13.9	B1503	0.4
High	NAYSRILQA	16	1	1	O15230		0	5.06833e+07	0	9.764e-05	37.66	0.0659359	2	1035.56	0.660696	49.0203	0	C1203	51.85	C1203	103	C1203	0.5
High	GKKKYETEF	19	1	1	Q96QD8		0	1.82157e+07	0	1.015e-07	37.64	0.0740403	2	1129.59	-0.367209	23.2577	0	C1203	33.33	B1503	132.8	B1503	2.5
High	KKFASFNAY	7	1	1	Q969S3		0	9.21912e+06	0	0.002947	37.62	0.0731799	2	1075.56	-0.194258	39.1588	0	C1203	40.74	B1503	2.9	B1503	0.01
High	KQTQIFTTY	13	2	2	P34931;P08107		0	2.50821e+07	0	2.668e-11	37.6	0.0747254	2	1129.59	-0.349503	48.5411	0	C1203	40.74	B1503	2.5	B1503	0.01
High	RKKPPMNSM	15	1	1	Q01844		0	1.13056e+07	0	0.0001861	37.54	0.0816676	2	1088.57	-0.710679	19.3824	0	C1203	37.04	B1503	30.7	B1503	0.8
High	IAFEFPVLV	9	1	1	Q8TDN4		0	5.84438e+06	0	0.0001778	37.53	0.0452547	2	1034.59	-0.0605897	105.302	0	C1203	88.89	C1203	10.1	C1203	0.03
High	RQYPEVIKY	22	1	1	Q9UIF8		0	2.32185e+07	0	7.391e-10	37.53	0.0565927	2	1195.65	-0.809276	43.0842	0	C1203	55.56	B1503	2.8	B1503	0.01
High	EIFNLKFAQA	16	1	1	P78347		0	1.20819e+07	0	4.524e-12	37.5	0.0585765	2	1180.64	-0.0909452	71.8963	0	C1203	8.57	A6802	102.8	A6802	0.8
High	SAFPFPVTV	35	1	1	Q96K37		0	6.28521e+07	0	0.002947	37.4	0.087746	2	964.513	-0.684394	91.6902	0	C1203	96.3	C1203	5.4	C1203	0.01
High	RVYPQAVYF	23	1	1	Q9Y4A5		0	1.74613e+08	0	6.545e-07	37.3	0.0525295	2	1142.6	-0.569656	60.2849	0	C1203	44.44	B1503	7.1	C1203	0.09
High	NVIGEPFLNV	9	1	1	P33991		0	5.82201e+06	0	0.002947	37.24	0.0904442	2	1101.59	-0.352073	86.7068	0	C1203	28.57	A6802	18.5	A6802	0.17
High	YSIDLSERV	6	1	1	Q6NTF9		0	1.04632e+07	0	9.248e-06	37.16	0.0696255	2	1081.55	-0.597187	59.1337	0	C1203	74.07	A6802	19.6	A6802	0.17
High	VQIDITRVF	1	1	1	Q9Y2A7		0	4.91183e+06	0	0.002947	37.16	0.0477888	2	1090.63	0.639084	76.0172	0	C1203	44.44	B1503	2.6	B1503	0.01
High	KEYERAIIF	10	1	1	P27105		0	1.55634e+07	0	1.973e-08	37.12	0.0621957	2	1168.64	-0.918966	49.1245	0	C1203	40.74	B1503	5	B1503	0.05
High	EVFAWNNEV	22	1	1	P49419		0	2.92693e+07	0	9.193e-07	37.08	0.0606458	2	1107.51	-0.270693	76.7531	0	C1203	44.44	A6802	3.2	A6802	0.01
High	MTPEIIQKL	33	1	1	Q9UMS4		0	1.51761e+08	0	0.002947	37.03	0.0636665	2	1072.61	-0.500014	61.384	0	C1203	74.07	A6802	29.6	A6802	0.3
High	FQYPDTRYL	24	1	1	Q9NY61		0	3.30129e+07	0	4.574e-15	36.98	0.0671999	2	1202.58	-0.641742	64.4173	0	C1203	55.56	B1503	5.4	C1203	0.01
High	SIYGSYRNF	22	1	1	Q7L576		0	3.96367e+07	0	8.531e-05	36.88	0.075534	2	1106.53	-0.23369	53.4982	0	C1203	40.74	B1503	33.7	B1503	0.8
High	KQFDAGTVNY	5	1	1	P52756		0	7.515e+06	0	3.327e-06	36.86	0.0724002	2	1142.55	-0.788389	44.2678	0	C1203	42.86	B1503	2.8	B1503	0.01
High	NLYGSPREY	38	1	1	Q9NZM1		0	3.00128e+08	0	0.002947	36.85	0.0686326	2	1098.52	-1.27824	42.0661	0	C1203	55.56	B1503	39.1	B1503	1
High	GKFNVLLTTY	15	2	2	P51531;P51532		0	1.30905e+07	0	0.0005499	36.82	0.0583459	2	1155.64	0.14495	67.9337	0	C1203	37.14	B1503	34.5	B1503	0.9
High	FSKDIFSVI	40	1	1	Q01650		0	3.04398e+08	0	0.00291	36.81	0.0594705	2	1055.58	-0.60215	78.0206	0	C1203	70.37	C1203	14.4	C1203	0.05
High	GQYSPPPYSEY	30	1	1	Q96BY9		0	5.51847e+07	0	7.871e-17	36.79	0.0299458	2	1287.55	-0.125351	60.1218	0		0	B1503	17.7	B1503	0.5
High	GKYFGGVLEY	28	1	1	O94955		0	71113928	0	2.411e-08	36.56	0.0909146	2	1132.57	-0.702282	65.7012	0	C1203	40	B1503	16.5	B1503	0.4
High	FAFPDEFVF	15	2	2	O14908;Q8TF65		0	1.22634e+07	0	8.24e-07	36.46	0.0693986	2	1118.52	-0.150791	105.146	0	C1203	85.19	B1503	8.6	C1203	0.12
High	EVSPVSFHQV	53	1	1	Q8N543		0	3.2228e+08	0	4.994e-07	36.36	0.0891417	2	1128.57	-0.354907	52.3889	0	C1203	25.71	A6802	5.5	A6802	0.03
High	STFIGEHYV	20	1	1	P08581		0	2.90079e+07	0	0.001893	36.34	0.099088	2	1052.5	-0.0712865	54.3136	0	C1203	70.37	A6802	6	A6802	0.03
High	KKSDPVVSY	41	1	1	P13639		0	3.1819e+08	0	0.001116	36.27	0.0745557	2	1022.55	-0.932459	28.0656	0	C1203	51.85	B1503	9.1	B1503	0.17
High	KKIESSGVTY	11	1	1	Q9UKN8		0	5.85247e+06	0	5.278e-06	36.17	0.0688527	2	1111.6	-0.648515	27.4887	0	C1203	31.43	B1503	10.6	B1503	0.25
High	YKITAEEMY	11	1	1	Q9Y3B4		0	1.20411e+07	0	7.638e-09	36.16	0.0715172	2	1147.53	0.0731272	53.4056	0	C1203	40.74	B1503	35.3	B1503	0.9
High	FQRGNDVAF	6	1	1	P17931		0	1.54095e+07	0	0.002947	36.01	0.0900194	2	1053.51	-0.920537	43.2879	0	C1203	40.74	B1503	2.9	B1503	0.01
High	GKSFTSNSY	2	2	2	Q8N988;Q96NG5		0	6.0707e+06	0	5.298e-05	35.99	0.090221	2	990.452	-0.283833	31.1484	0	C1203	40.74	B1503	12.9	B1503	0.3
High	RKIPVPANRY	32	1	1	Q9NRX1		0	3.98701e+07	0	0.0008142	35.95	0.0463855	3	1213.72	-0.190015	29.961	0	C1203	31.43	B1503	52	B1503	1.2
High	SAAEIYNEV	22	1	1	Q9BVG8		0	4.33091e+07	0	0.002303	35.84	0.106904	2	995.468	-0.108686	57.0296	0	C1203	85.19	A6802	5.5	A6802	0.03
High	DVYDKVDYL	16	1	1	Q14254		0	2.10168e+07	0	0.0004572	35.69	0.0811345	2	1129.54	0.0850472	64.3838	0	C1203	48.15	A6802	48.3	A6802	0.5
High	LSFQEVREY	9	1	1	O00311		0	1.55132e+07	0	5.73e-07	35.63	0.100261	2	1170.58	-0.0822494	57.8899	0	C1203	81.48	B1503	19.2	C1203	0.15
High	FGFHKPKMY	24	1	1	Q9NP50		0	4.1531e+07	0	5.776e-09	35.61	0.0977151	2	1154.58	-1.37509	39.5864	0	C1203	51.85	C1203	38.2	C1203	0.17
High	TTTEITHHGT	12	1	1	P15924		0	1.52517e+07	0	0.0001701	35.58	0.0865084	2	1097.52	-0.498629	18.8981	0	C1203	20	A6802	193.4	A6802	1.2
High	GKYGTLQEF	26	1	1	O75182		0	4.29271e+07	0	0.0007694	35.55	0.106987	2	1042.52	0.0115498	50.1027	0	C1203	40.74	B1503	7.4	B1503	0.12
High	QVCAIIERV	47	2	2	Q99613;B5ME19		0	3.88973e+08	0	0.002947	35.52	0.0863512	2	1030.57	-0.447179	56.2492	0	C1203	40.74	A6802	95.1	A6802	0.8
High	RKIQEESLRTY	2	2	2	Q99613;B5ME19		0	3.51736e+06	0	8.32e-13	35.44	0.104231	3	1422.77	-0.370721	30.6942	0		0	B1503	69.5	B1503	1.5
High	YAFPKAVSV	32	1	1	O15427		0	4.64795e+08	0	0.0004679	35.42	0.0938602	2	981.54	-0.0402051	59.2728	0	C1203	92.59	C1203	2.7	C1203	0.01
High	YAKDDPLEF	3	1	1	P06756		0	1.95274e+07	0	0.0009543	35.42	0.0919367	2	1097.51	-0.509701	58.2441	0	C1203	85.19	B1503	28.5	C1203	0.2
High	RKFEPGTQRF	7	2	2	Q96BX8;Q86TA1		0	7.05719e+06	0	2.09e-06	35.37	0.103006	3	1265.67	-0.0963459	29.428	0	C1203	45.71	B1503	12.9	B1503	0.3
High	RKKPTTEGF	15	1	1	Q03111		0	1.27944e+07	0	0.002947	35.35	0.0925262	2	1063.59	-0.45548	20.2596	0	C1203	37.04	B1503	39.5	B1503	1
High	LSFPYSYEV	19	1	1	Q53EP0		0	1.74754e+07	0	0.002947	35.24	0.0966801	2	1104.52	-0.546642	83.5131	0	C1203	81.48	A6802	16.5	C1203	0.06
High	SSFPTVVIY	40	1	1	Q9HCN4		0	3.76417e+08	0	7.817e-06	35.19	0.0949997	2	1012.53	-0.342475	82.7149	0	C1203	85.19	B1503	15.2	C1203	0.06
High	DVFHMVVEV	13	1	1	Q15181		0	1.9541e+08	0	0.002947	35.17	0.133601	2	1074.53	-0.269186	82.6882	0	C1203	51.85	A6802	14.1	A6802	0.12
High	LQHPNIVGY	1	1	1	Q9BQI3		0	2.79676e+07	0	6.588e-09	35.12	0.100558	2	1040.55	-0.436132	49.5895	0	C1203	51.85	B1503	3	B1503	0.01
High	EVFNYIHNI	16	1	1	Q8N3P4		0	2.63583e+07	0	0.0001363	35.12	0.128242	2	1148.57	-0.40542	66.0573	0	C1203	37.04	A6802	4.4	A6802	0.01
High	KQFKSEAY	11	1	1	Q03001		0	3.92604e+06	0	7.129e-05	35.11	0.125887	2	1000.51	0.0229472	22.3773	0	C1203	33.33	B1503	8.8	B1503	0.17
High	EQYESFVKF	12	1	1	Q9H9L7		0	1.69833e+07	0	2.071e-05	35.06	0.107134	2	1176.56	-0.228579	66.186	0	C1203	40.74	B1503	6.2	B1503	0.09
High	RNYYRKIGY	16	1	1	Q9H9T3		0	1.90413e+07	0	2.21e-13	35.06	0.138915	3	1232.65	-0.325715	30.6365	0	C1203	44.44	B1503	72.3	B1503	1.5
High	NTATIFHEL	41	1	1	Q9UHD2		0	2.11902e+08	0	0.0007021	34.96	0.162082	2	1045.53	-0.723196	58.3148	0	C1203	74.07	A6802	3.8	A6802	0.01
High	FSWEGAFQHV	10	1	1	P26641		0	1.09683e+07	0	2.922e-10	34.94	0.0935108	2	1207.55	-0.188195	74.9987	0	C1203	60	A6802	55.8	A6802	0.5
High	DIFEFLNHV	17	1	1	Q86VP6		0	9.55586e+06	0	0.0001594	34.79	0.138732	2	1133.56	-0.0738391	96.182	0	C1203	44.44	A6802	6.4	A6802	0.04
High	GKYIPKQSF	26	1	1	Q9P0I2		0	2.46237e+07	0	0.002947	34.77	0.097894	2	1067.59	-0.814254	34.3303	0	C1203	33.33	B1503	17.8	B1503	0.5
High	GQYSTGKTSF	14	1	1	Q9NZN4		0	2.9891e+07	0	0.0009602	34.7	0.122323	2	1075.5	-0.862014	34.3757	0	C1203	34.29	B1503	3.8	B1503	0.03
High	GKYFEPEAY	12	1	1	Q96NE9		0	1.3148e+07	0	1.988e-06	34.67	0.0910814	2	1103.5	0.00981419	50.086	0	C1203	44.44	B1503	14.1	B1503	0.4
High	TTFDHQNSENV	13	1	1	Q9Y2D8		0	9.42428e+06	0	1.078e-05	34.65	0.0470277	2	1291.55	-0.277396	33.5361	0		0	A6802	128.5	A6802	0.9
High	AKFVDGEWY	10	1	1	Q7KZF4		0	1.13495e+07	0	0.002696	34.54	0.0998607	2	1114.52	-0.655332	59.3949	0	C1203	44.44	B1503	76.2	B1503	1.6
High	AQLERQLQF	4	1	1	Q6P1N0		0	9.08531e+06	0	0.002947	34.47	0.140283	2	1132.61	-0.621758	53.9782	0	C1203	40.74	B1503	5.5	B1503	0.07
High	KGYPSEFSTY	19	1	1	P49674		0	1.2882e+07	0	5.737e-08	34.47	0.102412	2	1178.54	0.288038	50.0613	0	C1203	34.29	B1503	32.2	B1503	0.8
High	FASYMEQHL	1	1	1	Q9H4B4		0	5.92741e+06	0	1.635e-05	34.44	0.0885523	2	1125.5	-0.476306	55.1534	0	C1203	81.48	C1203	56.5	C1203	0.25
High	LSFPTTKTYFPHF	14	1	1	P69905		0	2.15038e+07	0	2.055e-08	34.39	0.17104	3	1585.8	-0.0867555	74.8822	0		0	B1503	222.8	B1503	3
High	KQALSGFGY	6	1	1	O75340		0	6.226e+06	0	2.957e-05	34.35	0.150898	2	970.499	-0.164069	48.7283	0	C1203	40.74	B1503	5.1	B1503	0.06
High	DAYDFSTDYV	8	1	1	Q9BVP2		0	1.0069e+07	0	0.0001662	34.34	0.0266341	2	1195.48	-0.366444	80.7747	0	C1203	60	A6802	10.1	A6802	0.08
High	SIWPLIRIY	16	1	1	Q9UBH6		0	7.98178e+06	0	0.000194	34.33	0.0562506	2	1160.68	-0.0142276	88.8973	0	C1203	51.85	B1503	72.7	B1503	1.5
High	YQYLEQSKY	4	1	1	Q9BTE7		0	6.8461e+06	0	4.964e-12	34.29	0.138772	2	1221.58	0.224071	46.4794	0	C1203	44.44	B1503	3.7	B1503	0.03
High	RLFGTTVTF	45	1	1	Q15904		0	1.81275e+08	0	1.469e-06	34.26	0.118379	2	1041.57	-0.468596	67.1166	0	C1203	44.44	B1503	3	B1503	0.01
High	YKFYSVNVDY	1	1	1	O00483		0	4.27758e+06	0	1.55e-14	34.2	0.126983	2	1297.61	0.35285	68.8824	0	C1203	40	B1503	6.6	B1503	0.1
High	QGYGSGRYY	4	1	1	P98179		0	5.0818e+06	0	0.002139	34.19	0.0914939	2	1050.46	-0.606271	37.1353	0	C1203	48.15	B1503	58.4	C1203	0.8
High	EVFALIHEL	4	1	1	Q12766		0	4.30404e+06	0	0.0007314	34.18	0.123712	2	1070.59	-0.0569836	80.0126	0	C1203	48.15	A6802	7.1	A6802	0.04
High	YATFIVTNY	20	1	1	Q9HBL8		0	6.02869e+07	0	4.684e-07	34.18	0.176821	2	1091.54	-0.319207	77.2426	0	C1203	81.48	C1203	25.5	C1203	0.1
High	SQFKGYFIF	31	1	1	Q9NY27		0	6.17443e+07	0	2.797e-07	33.96	0.147859	2	1136.58	-0.196373	78.0003	0	C1203	33.33	B1503	2.2	B1503	0.01
High	AAYYHPSYL	14	1	1	Q14687		0	3.08574e+07	0	0.002947	33.95	0.112016	2	1084.51	-0.232563	52.0682	0	C1203	85.19	C1203	6.4	C1203	0.01
High	RQKGTGKEY	5	1	1	O43293		0	4.74334e+06	0	7.782e-09	33.87	0.144351	2	1066.56	-0.466113	15.9587	0	C1203	48.15	B1503	8.9	B1503	0.17
High	VmAPRTLVL	112	9	9	P01892;P30447;P05534;P18462;P30450;P30456;P30457;P01891;P10316	M2(Oxidation)	0	2.79722e+08	0	0.00015	33.72	0.0853061	2	1015.6	0.0444338	56.3777	0	C1203	59.26	B1503	10.1	B1503	0.2
High	KAYHEQLTV	32	1	1	Q9BQE3		0	106833195	0	0.001886	33.71	0.210799	2	1088.57	-0.539904	31.5456	0	C1203	85.19	C1203	45.5	C1203	0.2
High	VmAPRTLIL	95	8	8	P04222;P30504;Q9TNN7;Q29963;P30505;P30508;P30510;Q29960	M2(Oxidation)	0	1.46277e+08	0	9.565e-05	33.69	0.0768117	2	1029.61	-0.810369	60.3172	0	C1203	55.56	B1503	16.1	B1503	0.4
High	RLVQSPNSY	2	2	2	Q71UM5;P42677		0	6.56872e+06	0	2.836e-06	33.69	0.181714	2	1063.55	-0.194871	36.8535	0	C1203	40.74	B1503	7.6	B1503	0.12
High	YGYEHILTL	16	1	1	Q96AX1		0	5.02737e+07	0	1.096e-05	33.49	0.211276	2	1108.57	-0.589329	70.3575	0	C1203	59.26	C1203	5.3	C1203	0.01
High	YGYRQSVTY	18	1	1	P08174		0	1.8267e+07	0	2.866e-07	33.36	0.156756	2	1136.54	-0.702853	42.9406	0	C1203	51.85	B1503	7.1	C1203	0.06
High	NAMDVVVQF	12	1	1	O95870		0	2.66246e+07	0	0.002947	33.35	0.205968	2	1022.5	-0.174292	82.111	0	C1203	77.78	B1503	92.9	C1203	0.5
High	YAFPKSITV	30	1	1	P53985		0	264182912	0	0.0007821	33.27	0.134134	2	1025.57	-0.53986	63.2208	0	C1203	96.3	C1203	2.7	C1203	0.01
High	RKYNELLKSY	20	1	1	P10909		0	3.40211e+07	0	5.302e-12	33.24	0.148959	3	1313.72	-0.45335	36.9282	0	C1203	34.29	B1503	15.3	B1503	0.4
High	SAYDPPRQI	17	1	1	P43268		0	3.38617e+07	0	0.002947	33.13	0.214554	2	1046.53	-0.849416	42.4755	0	C1203	81.48	C1203	35.9	C1203	0.17
High	GKFTEGNITY	9	1	1	Q7Z2W4		0	2.00594e+07	0	0.002947	33.06	0.171427	2	1129.55	-0.247601	47.8698	0	C1203	37.14	B1503	19.6	B1503	0.5
High	TVFNFQEKV	17	1	1	Q14204		0	2.20016e+07	0	0.00227	33.02	0.191148	2	1111.58	-0.537059	59.5203	0	C1203	40.74	A6802	12.3	A6802	0.1
High	SKYFERHGY	11	1	1	O95786		0	1.10001e+07	0	1.353e-10	33	0.149379	2	1186.56	-0.196364	27.4326	0	C1203	40.74	B1503	21.9	B1503	0.6
High	KQFQKVITEY	16	1	1	Q7KZF4		0	1.95379e+07	0	1.405e-12	32.98	0.162454	2	1283.7	-0.714633	40.1534	0	C1203	37.14	B1503	5	B1503	0.05
High	EAFIAWIHV	11	1	1	P21283		0	7.2616e+06	0	0.002947	32.95	0.126038	2	1085.58	0.0342289	85.3765	0	C1203	81.48	A6802	19.9	A6802	0.17
High	AKKISQLGY	17	1	1	P26196		0	1.68978e+07	0	0.002947	32.94	0.0857011	2	1007.59	-0.499288	30.6448	0	C1203	44.44	B1503	89.1	B1503	1.7
High	RQLEDILSTY	31	1	1	P40222		0	6.15863e+07	0	5.022e-09	32.91	0.18899	2	1237.64	-0.0580032	68.0338	0	C1203	28.57	B1503	5.5	B1503	0.07
High	SALEVVRKY	5	1	1	Q92797		0	6.51732e+06	0	0.0002718	32.89	0.105019	2	1064.61	-0.917691	39.0934	0	C1203	85.19	B1503	104.7	C1203	0.6
High	KNFPWQVFF	19	1	1	P09871		0	1.61464e+07	0	0.0007181	32.88	0.213768	2	1212.62	0.261934	92.1643	0	C1203	44.44	B1503	19.7	B1503	0.5
High	EAFQGTKVFV	21	1	1	P61289		0	28058942	0	9.673e-05	32.8	0.193523	2	1125.59	-0.561466	57.2703	0	C1203	68.57	A6802	13	A6802	0.12
High	NTIPFIIRY	27	1	1	Q8N5C6		0	1.39545e+08	0	2.296e-07	32.73	0.114187	2	1136.65	-0.325236	75.0294	0	C1203	81.48	C1203	142.6	C1203	0.7
High	MARETWEVL	9	1	1	Q86X10		0	1.27182e+07	0	1.631e-05	32.66	0.228508	2	1134.56	-0.488961	61.8189	0	C1203	81.48	C1203	56	C1203	0.25
High	RQFEFSVDSF	17	3	3	Q96IP4;Q5VWP2;Q8NEK8		0	2.14823e+07	0	1.072e-10	32.55	0.178584	2	1261.58	0.0437275	73.2043	0	C1203	40	B1503	2.7	B1503	0.01
High	AKAGGFVVGY	4	1	1	Q9HAV4		0	7.82686e+06	0	0.0001069	32.53	0.198927	2	968.52	-0.162387	50.5021	0	C1203	40	B1503	16.3	B1503	0.4
High	EIVQFFQGL	1	1	1	P31942		0	6.23137e+06	0	3.745e-05	32.5	0.23593	2	1080.57	-0.824099	96.0997	0	C1203	37.04	A6802	32.6	A6802	0.3
High	YSFYLPIAA	3	1	1	P14324		0	1.6423e+07	0	0.001908	32.38	0.229996	2	1044.54	-0.345463	93.9707	0	C1203	44.44	C1203	17.5	C1203	0.06
High	MAFDPTSTLL	7	1	1	Q12788		0	8.98183e+06	0	0.002947	32.34	0.217975	2	1095.54	0.426347	89.0406	0	C1203	80	C1203	28.8	C1203	0.12
High	YTTDRVMTV	7	2	2	Q13547;Q92769		0	1.3067e+07	0	0.0001682	32.2	0.187727	2	1085.53	-1.37033	44.3828	0	C1203	81.48	C1203	6.7	C1203	0.01
High	RQFPTAFEF	28	1	1	Q13614		0	2.7195e+07	0	5.351e-09	32.2	0.180316	2	1142.56	-0.263995	70.0905	0	C1203	44.44	B1503	2.3	B1503	0.01
High	FKNIQPSSF	10	1	1	Q9BVQ7		0	7.51214e+06	0	6.048e-07	32.09	0.241614	2	1067.55	-0.354043	50.3222	0	C1203	37.04	B1503	6.1	B1503	0.08
High	MKFPTQSSF	2	1	1	Q9HCD6		0	1.84665e+07	0	4.231e-08	32.07	0.209636	2	1072.51	-0.350875	56.2577	0	C1203	40.74	B1503	2.3	B1503	0.01
High	GQIPEIIFY	9	1	1	Q9H0C5		0	3.89798e+06	0	0.002947	32.05	0.251084	2	1079.58	-0.353356	92.7486	0	C1203	51.85	B1503	11.1	B1503	0.25
High	EVDEQMLNV	19	4	4	Q13885;Q9BVA1;P68371;P07437		0	3.42001e+07	0	0.001551	32.01	0.171383	2	1076.49	-0.40136	65.9259	0	C1203	44.44	A6802	186.4	A6802	1.2
High	FQAPRNPTL	20	1	1	Q8IZW8		0	1.75231e+08	0	7.112e-05	31.96	0.22342	2	1043.56	-0.722239	47.2686	0	C1203	55.56	B1503	9.6	C1203	0.15
High	SKLLANMVY	10	1	1	P28074		0	2.29813e+07	0	0.002947	31.95	0.196043	2	1038.56	-1.09458	58.3751	0	C1203	40.74	B1503	8.3	B1503	0.15
High	AQVVQWVSF	13	1	1	P26641		0	9.12751e+06	0	3.344e-05	31.9	0.268883	2	1063.56	-0.320628	86.28	0	C1203	37.04	B1503	4.7	B1503	0.05
High	TTHFVEGGDA	3	1	1	P18124		0	8.64165e+06	0	0.002947	31.89	0.151723	2	1033.46	-0.489511	31.0792	0	C1203	20	A6802	466.7	A6802	2.5
High	SQYNIRGVTY	10	1	1	Q8TBC4		0	8.71642e+06	0	0.002028	31.76	0.241951	2	1200.6	-0.428098	51.4143	0	C1203	34.29	B1503	4	B1503	0.03
High	NSYVSPRIL	14	1	1	Q9H992		0	4.3258e+07	0	0.001903	31.66	0.249429	2	1048.58	-0.408841	53.5159	0	C1203	77.78	C1203	143.8	C1203	0.7
High	FFIAGRYEF	10	1	1	P13807		0	8487488	0	2.065e-06	31.63	0.333778	2	1149.57	0.106366	74.2052	0	C1203	37.04	B1503	49	B1503	1.1
High	RQFMAETQF	14	1	1	Q14444		0	2.59412e+07	0	8.251e-07	31.62	0.183973	2	1157.54	-0.141928	53.0317	0	C1203	33.33	B1503	2.3	B1503	0.01
High	KQIVEILTAY	6	1	1	Q16891		0	9.3336e+06	0	3.381e-05	31.62	0.105949	2	1177.68	-0.272276	69.1166	0	C1203	28.57	B1503	5.8	B1503	0.08
High	VVYPWTQRF	27	5	5	P68871;P02042;P02100;P69891;P69892		0	4.9019e+07	0	6.52e-10	31.61	0.202896	2	1195.63	-0.501462	69.2087	0	C1203	44.44	C1203	26.3	C1203	0.12
High	FAYPNRPDVL	37	1	1	Q03518		0	1.40143e+08	0	3.891e-05	31.59	0.286593	2	1191.62	-0.581955	60.2516	0	C1203	80	C1203	21.8	C1203	0.08
High	FAKDFMTYL	1	1	1	Q9H1A4		0	7.25845e+06	0	3.257e-06	31.55	0.264575	2	1135.55	-0.0434726	76.4484	0	C1203	81.48	C1203	4.4	C1203	0.01
High	NTYGFPIIF	8	1	1	P11498		0	2.61781e+07	0	0.002526	31.54	0.262029	2	1071.55	-0.379443	101.68	0	C1203	74.07	C1203	39.9	C1203	0.2
High	GKFPSLLTH	27	1	1	P62906		0	2.4946e+08	0	0.000549	31.5	0.21249	2	999.562	-0.538429	47.6117	0	C1203	18.52	B1503	112.8	B1503	2
High	YAFLHRTL	3	2	2	Q9UH17;Q8IUX4		0	7.04125e+06	0	3.211e-07	31.34	0.181902	2	1020.56	0.0561787	47.1514	0	C1203	90	C1203	586.9	C1203	1.9
High	ASFDGRISVY	3	1	1	O94979		0	3.91589e+07	0	0.0002057	31.31	0.279793	2	1114.55	-0.227416	57.7702	0	C1203	80	B1503	29.5	C1203	0.4
High	RQIGSVDTF	4	1	1	Q99519		0	5.48016e+06	0	0.0002829	31.23	0.302435	2	1022.53	-0.341917	45.667	0	C1203	40.74	B1503	3	B1503	0.01
High	EGYPGQRYY	14	1	1	P34896		0	1.26739e+07	0	0.0006162	31.04	0.15737	2	1132.51	-0.670035	44.0738	0	C1203	51.85	C1203	213.1	C1203	0.9
High	RSYPYAFSV	19	1	1	Q5H9F3		0	2.75463e+07	0	0.0001314	30.95	0.297144	2	1089.54	-0.529675	59.5478	0	C1203	77.78	C1203	13.9	C1203	0.04
High	YVVPFVAKV	5	1	1	A5YKK6		0	5.79143e+06	0	3.471e-07	30.93	0.114022	2	1021.61	-0.100342	68.1458	0	C1203	51.85	A6802	7.3	A6802	0.05
High	EVMMLTERV	11	1	1	Q9H0S4		0	1.59839e+07	0	0.0001286	30.87	0.339417	2	1107.55	-0.544548	58.5882	0	C1203	37.04	A6802	6.1	A6802	0.03
High	VKVIDRILY	11	1	1	O75533		0	1.45049e+07	0	3.601e-06	30.87	0.0492307	2	1118.69	0.139157	53.2653	0	C1203	44.44	B1503	42	B1503	1
High	GKRKSDTEF	5	1	1	O94782		0	2.63977e+06	0	0.0005395	30.86	0.294506	2	1067.55	-0.371205	17.4836	0	C1203	33.33	B1503	41.9	B1503	1
High	TVFEHTFHV	21	1	1	P41250		0	5.02929e+07	0	9.603e-06	30.85	0.260898	2	1116.55	-0.339172	50.476	0	C1203	44.44	A6802	2.4	A6802	0.01
High	RAAPFSLEY	20	1	1	Q15181		0	37115645	0	0.002947	30.84	0.324051	2	1053.53	-1.4937	59.8918	0	C1203	92.59	B1503	4	B1503	0.03
High	RKNPVQEQTY	6	1	1	Q8N9N2		0	3.21312e+06	0	3.493e-07	30.84	0.336702	2	1262.65	0.0316871	26.4081	0	C1203	34.29	B1503	74.8	B1503	1.5
High	RKFTQLREY	14	1	1	O95625		0	1.46674e+07	0	1.209e-09	30.8	0.208731	3	1240.68	-0.171898	31.2459	0	C1203	48.15	B1503	7.3	B1503	0.12
High	RAFPLPMSF	16	1	1	Q9UHJ6		0	1.28738e+07	0	3.198e-05	30.66	0.321271	2	1065.55	-0.420693	77.3014	0	C1203	81.48	B1503	2.7	B1503	0.01
High	FSWPDVREL	5	1	1	A1L390		0	8.01229e+06	0	5.993e-06	30.66	0.358123	2	1148.57	-0.218979	79.8636	0	C1203	88.89	C1203	15.3	C1203	0.05
High	RKKQSDVMRF	10	1	1	P61313		0	5.96969e+06	0	9.751e-09	30.63	0.259274	3	1294.7	-0.111775	23.1684	0	C1203	28.57	B1503	101.3	B1503	1.9
High	FAFPLHVDY	20	1	1	Q8TDY4		0	2.47902e+07	0	6.344e-05	30.62	0.302136	2	1108.55	-0.0461173	78.8585	0	C1203	92.59	C1203	8.8	C1203	0.02
High	YTTTIEAFI	1	1	1	P07814		0	2.85308e+07	0	0.0004592	30.6	0.311239	2	1058.54	-0.0268557	85.0851	0	C1203	62.96	A6802	6	A6802	0.03
High	DTFYIFNHV	6	1	1	Q99805		0	7.75063e+06	0	2.021e-12	30.54	0.245099	2	1155.55	-0.13913	78.9689	0	C1203	70.37	A6802	3.2	A6802	0.01
High	KHQEHILRF	18	1	1	Q13263		0	2.08059e+07	0	2.482e-07	30.51	0.236527	3	1207.67	-0.196392	28.0586	0	C1203	40.74	B1503	53.8	B1503	1.2
High	RSTKTGTAY	14	1	1	P17844		0	3.32756e+07	0	1.957e-05	30.5	0.304808	2	984.511	-0.309412	16.9481	0	C1203	66.67	B1503	17	B1503	0.5
High	FTITPPTAQV	18	1	1	P52907		0	3.48993e+07	0	0.002892	30.47	0.460964	2	1074.58	-0.431954	72.5411	0	C1203	51.43	A6802	7.3	A6802	0.05
High	AKLKKFIAY	8	1	1	P33992		0	1.00307e+07	0	0.0006098	30.44	0.0501977	2	1081.68	-0.286619	35.8556	0	C1203	44.44	B1503	11.3	B1503	0.25
High	EVSFVIHNL	28	2	2	P49903;Q99611		0	1.397e+08	0	8.553e-05	30.43	0.376558	2	1057.57	-0.842727	67.5909	0	C1203	44.44	A6802	6.3	A6802	0.04
High	SKMFHPNVY	14	2	2	P49459;P63146		0	1.20456e+07	0	9.177e-10	30.28	0.33785	2	1122.54	-0.348183	38.7457	0	C1203	44.44	B1503	4.3	B1503	0.04
High	TTFEHAHNm	7	1	1	P13639	M9(Oxidation)	0	1.45784e+06	0	1.552e-09	30.21	0.0950891	2	1103.46	-0.166124	19.1658	0	C1203	66.67	C1203	25.6	C1203	0.1
High	RQYGSEGRFTF	25	2	2	Q7Z7H5;Q9BVK6		0	4.57494e+07	0	1.458e-05	30.16	0.389291	3	1347.64	-0.425938	45.1945	0		0	B1503	8.2	B1503	0.15
High	KHFGTILNY	22	2	2	Q13829;Q9H3F6		0	5.76501e+07	0	0.000425	30.14	0.330038	2	1092.58	-0.3494	48.3378	0	C1203	51.85	B1503	8.4	B1503	0.15
High	SQFPQPQHF	10	1	1	Q9P215		0	1.36972e+07	0	8.463e-07	30.12	0.280394	2	1115.53	0.111013	49.9858	0	C1203	44.44	B1503	2.8	B1503	0.01
High	LLYESPERY	12	1	1	Q03518		0	3.43364e+07	0	2.278e-10	30.1	0.382246	2	1169.58	-0.273326	51.3352	0	C1203	48.15	B1503	16.1	B1503	0.4
High	SQYPFPVTLY	9	1	1	Q5R372		0	1.14418e+07	0	1.556e-05	30.06	0.342288	2	1214.61	0.165731	91.3334	0	C1203	34.29	B1503	3.5	B1503	0.02
High	HTINGHNAEV	27	1	1	P22626		0	9.92136e+07	0	0.0007823	30	0.38565	2	1091.52	-0.565178	23.671	0	C1203	45.71	A6802	16.9	A6802	0.15
High	RQINWTVLY	30	1	1	P83731		0	1.32172e+08	0	8.656e-05	29.84	0.321582	2	1192.65	-0.277572	70.6835	0	C1203	40.74	B1503	2.5	B1503	0.01
High	REYEAQQQY	2	1	1	Q9NUQ8		0	6.60888e+06	0	2.383e-10	29.84	0.202889	2	1214.54	-0.229502	31.0917	0	C1203	44.44	B1503	8	B1503	0.15
High	EQYEQILAF	1	2	2	Q2VIR3;P41091		0	1.77215e+07	0	0.0002254	29.8	0.404087	2	1140.56	-0.0217394	85.0916	0	C1203	44.44	B1503	3.8	B1503	0.03
High	EVISGKQEGV	7	2	2	Q9Y227;Q9NQZ7		0	7533706	0	0.002947	29.79	0.48258	2	1045.55	-0.16987	32.309	0	C1203	28.57	A6802	35.8	A6802	0.4
High	EAAFFEGHFL	13	1	1	Q5W0V3		0	1.45912e+07	0	1.83e-06	29.74	0.301468	2	1167.55	-0.163395	76.7806	0	C1203	60	A6802	27.9	A6802	0.3
High	YAYDGKDYI	15	16	16	P01892;P30447;P05534;P10316;P01889;P30460;Q04826;P30479;P30480;P30486;P18464;P30490;P30498;Q31610;P30499;P04222		0	1.52823e+07	0	0.002947	29.67	0.285813	2	1107.5	-0.12478	52.9364	0	C1203	77.78	C1203	6	C1203	0.01
High	TKYLENQAF	2	1	1	Q99661		0	1.42287e+07	0	0.0002638	29.66	0.40597	2	1113.56	-0.428236	47.6058	0	C1203	33.33	B1503	9.3	B1503	0.17
High	KAIDYIRFL	23	1	1	P36956		0	2.23819e+07	0	2.347e-05	29.57	0.177315	2	1138.66	0.287833	67.8799	0	C1203	85.19	C1203	20.2	C1203	0.08
High	RAFEYEIRF	38	1	1	O60566		0	5.2656e+07	0	4.667e-05	29.52	0.415529	3	1230.63	-0.950656	60.8877	0	C1203	77.78	B1503	9.5	B1503	0.2
High	RQLGLEHTRY	3	1	1	Q92508		0	2.8672e+06	0	3.998e-05	29.5	0.458625	3	1272.68	0.126548	29.761	0	C1203	31.43	B1503	15	B1503	0.4
High	YCYDNIHFM	1	2	2	Q7L1Q6;Q9Y6E2		0	1.48723e+07	0	1.835e-07	29.48	0.0653775	2	1205.47	-0.456406	70.9337	0	C1203	44.44	C1203	17.9	C1203	0.06
High	KMYSTDDGVQF	3	1	1	Q15029		0	8.70591e+06	0	1.626e-10	29.42	0.20829	2	1290.57	-0.0519924	53.8551	0		0	B1503	22.7	B1503	0.6
High	ALLNFVVKY	1	1	1	O00469		0	4.93975e+06	0	0.0001269	29.32	0.151684	2	1066.63	-0.244921	76.1093	0	C1203	48.15	B1503	71.2	B1503	1.5
High	RLFKDQLVY	15	1	1	Q9Y3I1		0	2.47076e+07	0	5.402e-06	29.26	0.251324	2	1181.67	-0.300679	51.9454	0	C1203	48.15	B1503	4.1	B1503	0.03
High	KKIDASQTEF	2	1	1	O94979		0	8.19309e+06	0	0.002947	29.18	0.42823	2	1166.6	-0.592758	31.1299	0	C1203	34.29	B1503	17.1	B1503	0.5
High	ETFDFVHNV	10	1	1	Q96E29		0	6.60676e+07	0	0.002947	29.09	0.381831	2	1107.51	-0.151443	65.2194	0	C1203	77.78	A6802	1.9	A6802	0.01
High	FTADVRSVL	18	1	1	O95476		0	2.64711e+07	0	0.0006978	29.08	0.446671	2	1007.55	-0.14274	61.9225	0	C1203	81.48	C1203	5.9	C1203	0.01
High	KAYHEQLSV	24	6	6	Q71U36;P68363;Q13748;Q6PEY2;P68366;Q9NY65		0	7.36148e+07	0	0.002947	28.96	0.593104	2	1074.56	-0.750882	31.489	0	C1203	81.48	C1203	48.2	C1203	0.25
High	EAVSFQHFI	14	1	1	Q99598		0	2.17742e+07	0	0.002075	28.95	0.553082	2	1077.54	-0.100988	68.1202	0	C1203	70.37	A6802	6.7	A6802	0.04
High	RKKAYADFY	3	1	1	P09669		0	1.66132e+07	0	1.64e-08	28.94	0.541976	2	1161.6	-0.736614	31.1129	0	C1203	37.04	B1503	32.7	B1503	0.8
High	GKIADRFLLY	1	1	1	P61968		0	8.99209e+06	0	1.554e-06	28.94	0.240353	2	1195.68	-0.224334	60.0611	0	C1203	31.43	B1503	44.7	B1503	1.1
High	YKIDEDGKKF	1	1	1	O75821		0	4.36889e+06	0	3.914e-06	28.91	0.472279	3	1242.64	0.0800975	32.6425	0	C1203	40	B1503	493.8	B1503	5
High	RKLEAAEDIAY	21	1	1	P35232		0	3.48163e+07	0	0.002947	28.88	0.565175	2	1278.67	-0.501155	41.9274	0		0	B1503	103.4	B1503	1.9
High	HKFPDEDSY	41	1	1	Q6VY07		0	7.8117e+07	0	8.974e-10	28.76	0.200766	2	1137.48	-0.297763	35.8772	0	C1203	48.15	B1503	55.7	B1503	1.3
High	TAAFWTRLY	2	2	2	Q8IXX5;Q1AE95		0	1.65785e+07	0	4.939e-06	28.65	0.412923	2	1128.58	-0.238952	74.6185	0	C1203	81.48	C1203	28.2	C1203	0.12
High	LSFPTTKTY	19	1	1	P69905		0	4.08981e+07	0	0.0003593	28.6	0.486793	2	1057.56	-0.477987	54.2661	0	C1203	85.19	B1503	9.7	C1203	0.03
High	RQADFVQVL	25	1	1	Q9Y2V7		0	1.19502e+08	0	0.00128	28.43	0.505221	2	1075.59	-0.450398	59.6998	0	C1203	51.85	B1503	4.2	B1503	0.03
High	QAYPEVRIV	15	1	1	Q08211		0	6.67283e+07	0	0.0006328	28.37	0.568648	2	1074.59	-0.317916	56.6429	0	C1203	92.59	C1203	79.9	C1203	0.4
High	TTFDKEFLL	14	1	1	O60306		0	2.17517e+07	0	0.002947	28.35	0.449693	2	1113.58	-0.668583	72.5512	0	C1203	74.07	A6802	22.5	A6802	0.25
High	KRFEPGTQRF	6	1	1	Q70IA8		0	7.05719e+06	0	0.002947	28.33	0.521028	3	1265.68	0.0483243	30.0898	0	C1203	45.71	B1503	42.6	B1503	1
High	VKIQKHVTF	6	1	1	P23381		0	3.36157e+06	0	0.0005792	28.14	0.253902	2	1099.66	-0.779102	29.6254	0	C1203	40.74	B1503	9.3	B1503	0.17
High	YVTDVLYRV	10	1	1	Q96Q15		0	7.9136e+07	0	0.000769	28.1	0.540227	2	1127.61	-0.989052	66.588	0	C1203	44.44	A6802	5	A6802	0.02
High	EIIQRIENV	13	1	1	Q9H074		0	1.54459e+07	0	0.002947	28.07	0.454999	2	1113.63	-0.358477	54.2043	0	C1203	40.74	A6802	26.7	A6802	0.25
High	WAYPRQVFI	18	1	1	Q9P2D0		0	4.19283e+07	0	0.002947	27.99	0.471957	2	1179.63	-0.373454	72.8392	0	C1203	81.48	C1203	7.8	C1203	0.01
High	YTSDLHFQV	20	1	1	Q1KMD3		0	4.77543e+07	0	0.0001425	27.76	0.608423	2	1109.53	-0.155674	60.3709	0	C1203	77.78	A6802	3.1	A6802	0.01
High	ETYQFSGVYV	9	1	1	P61160		0	7.27559e+07	0	0.002947	27.73	0.526289	2	1192.55	0.366049	77.3314	0	C1203	45.71	A6802	3.8	A6802	0.01
High	YKKGKDSLY	19	2	2	P83881;Q969Q0		0	1.24932e+07	0	0.002947	27.67	0.819183	2	1101.59	-0.32484	21.2915	0	C1203	44.44	B1503	33.8	B1503	0.8
High	KSFEGLFYF	5	1	1	Q00610		0	16528939	0	0.0001921	27.59	0.717886	2	1137.56	-0.742603	84.0669	0	C1203	66.67	B1503	7.6	B1503	0.12
High	ETFNDFVRL	11	1	1	O43913		0	1.97534e+07	0	0.0004125	27.43	0.689347	2	1140.57	-0.145889	73.7604	0	C1203	74.07	A6802	16	A6802	0.15
High	EVFEGREDSI	5	2	2	P43357;P43360		0	6.50252e+06	0	4.539e-05	27.31	0.735226	2	1180.55	-0.601772	47.3956	0	C1203	28.57	A6802	54.6	A6802	0.5
High	RQFPVTVHF	19	1	1	Q8IY37		0	2.48586e+07	0	3.88e-09	27.3	0.784311	2	1130.61	-0.269066	55.2637	0	C1203	44.44	B1503	2.5	B1503	0.01
High	QKFLQGLVY	15	1	1	Q5J8M3		0	6.74779e+07	0	3.346e-06	27.29	0.437106	2	1095.62	-0.727641	66.9214	0	C1203	48.15	B1503	7	B1503	0.12
High	KKFPQMTSY	1	1	1	Q9Y2K5		0	3.91748e+06	0	4.152e-06	27.07	0.778374	2	1129.57	-0.31427	37.664	0	C1203	48.15	B1503	4.9	B1503	0.05
High	RKVYWFEKF	9	1	1	O60524		0	1.6096e+07	0	7.319e-13	26.94	0.68641	3	1302.7	-0.605871	54.4571	0	C1203	29.63	B1503	19	B1503	0.5
High	YAYATVLTF	3	1	1	O15439		0	6.40489e+06	0	1.008e-05	26.87	0.977268	2	1048.53	-0.379389	86.5266	0	C1203	85.19	B1503	2.1	B1503	0.01
High	NTCPYVHNI	34	1	1	Q9Y2Y1		0	1.64501e+08	0	0.001665	26.84	0.536167	2	1060.49	-0.0930347	47.6433	0	C1203	70.37	A6802	42.1	A6802	0.4
High	EAFHGKFYEA	30	1	1	Q13045		0	7.89242e+07	0	6.965e-06	26.74	0.491354	2	1198.55	-0.822567	39.8252	0	C1203	42.86	A6802	26.5	A6802	0.25
High	HQFLQNEY	25	1	1	Q16531		0	4.23019e+07	0	0.002947	26.73	0.611282	2	1078.49	-0.646146	45.2156	0	C1203	43.33	B1503	24.1	B1503	0.6
High	YAFPKSITVF	14	1	1	P53985		0	2.95783e+07	0	7.709e-08	26.73	0.763306	2	1172.64	0.204842	76.4365	0	C1203	77.14	B1503	5.9	C1203	0.06
High	YLLPDTKAY	8	1	1	P14625		0	1.71924e+07	0	0.001936	26.49	0.714452	2	1083.57	-0.489583	57.7346	0	C1203	51.85	B1503	9.9	B1503	0.2
High	ETYPDPVRV	53	1	1	P49588		0	598579272	0	0.001724	26.46	1.19965	2	1075.54	-0.656419	50.9416	0	C1203	85.19	A6802	9.8	A6802	0.07
High	RKRPVPKGATY	14	1	1	P61313		0	1.26753e+07	0	0.0008275	26.42	0.37637	3	1272.75	-0.165571	19.9831	0		0	B1503	142.7	B1503	2.5
High	RMWKTLTFF	17	1	1	P12074		0	3.0423e+07	0	1.534e-07	26.3	1.02267	3	1229.65	-0.193056	69.2612	0	C1203	29.63	B1503	3.7	B1503	0.03
High	YQSPVRVY	16	2	2	Q92503;O43304		0	1.66045e+07	0	2.364e-05	26.04	0.924486	2	1011.53	-0.559731	46.9749	0	C1203	43.33	B1503	6.1	B1503	0.08
High	FSNDIPHVV	1	1	1	Q8NI36		0	4.08571e+07	0	0.0006482	25.85	1.00886	2	1027.52	0.274829	56.2909	0	C1203	81.48	C1203	9.2	C1203	0.02
High	RQKDVKDGKY	8	1	1	P62269		0	1.54289e+06	0	6.606e-10	25.78	0.784928	3	1236.67	0.245154	16.4861	0	C1203	34.29	B1503	113.7	B1503	2
High	YLSMVFSIV	1	1	1	O75340		0	9.95268e+06	0	4.28e-08	25.72	1.17857	2	1058.56	0.00786919	101.156	0	C1203	44.44	A6802	191.4	C1203	1
High	KQMEDGHTLF	3	1	1	Q96T88		0	1.10645e+07	0	0.0006908	25.59	0.878416	3	1205.56	-1.06855	39.1076	0	C1203	28.57	B1503	3.6	B1503	0.03
High	HKIDKSHEF	5	1	1	Q9NWV8		0	1.41696e+06	0	5.619e-05	25.5	0.92908	2	1140.58	-0.0296845	18.9651	0	C1203	37.04	B1503	24	B1503	0.6
High	AKKEKEPEY	3	1	1	O95793		0	1.05537e+06	0	0.002947	25.3	1.33808	2	1121.58	-0.0851806	17.8382	0	C1203	48.15	B1503	226.2	B1503	3.5
High	PGDSDIIRSMPEQTGEK	3	1	1	P62888		0	6.42412e+06	0	9.974e-21	25.3	1.31137	3	1859.88	-0.330866	47.1349	0
High	RAFGIPIRV	31	1	1	P06493		0	5.4257e+08	0	0.002947	25.24	0.442107	2	1028.64	-0.613933	56.7496	0	C1203	88.89	C1203	30	C1203	0.12
High	HTILIVEKV	10	1	1	Q8TD19		0	1.73261e+07	0	0.0006462	25.14	0.172389	2	1051.65	-0.350816	46.6516	0	C1203	70.37	A6802	7.1	A6802	0.04
High	VMRAQGNVY	2	1	1	P61968		0	8.26743e+06	0	0.002947	25.05	1.1418	2	1037.52	-0.372612	32.3786	0	C1203	44.44	B1503	7.2	B1503	0.12
High	ESFEKAYQV	21	1	1	Q86V86		0	3.37273e+07	0	0.0003272	24.78	1.09811	2	1100.53	-0.198937	47.2927	0	C1203	74.07	A6802	6.1	A6802	0.03
High	RKIEDNEFHY	7	1	1	O43847		0	6.63397e+06	0	1.295e-15	24.72	1.24881	3	1350.64	-0.376614	34.9191	0	C1203	28.57	B1503	123.9	B1503	2.5
High	EVIDFSHGL	44	3	3	Q96GS6;Q5VST6;Q6PCB6		0	7.16184e+08	0	0.0008651	24.68	1.52197	2	1016.5	-0.513796	66.7903	0	C1203	40.74	A6802	3.3	A6802	0.01
High	YAAIRDNYF	2	2	2	P11233;P11234		0	5.08868e+06	0	0.0007418	24.68	1.08148	2	1132.54	0.0641273	57.0446	0	C1203	74.07	C1203	26.5	C1203	0.12
High	MKFIDNTLY	6	1	1	Q14116		0	1.42855e+07	0	3.018e-07	24.61	1.34415	2	1144.57	-0.235137	66.0416	0	C1203	40.74	B1503	6.1	B1503	0.08
High	GQVTFLHVF	1	1	1	Q9BW60		0	4.77452e+06	0	0.002947	24.43	1.31647	2	1047.56	-0.164174	74.0321	0	C1203	33.33	B1503	3.9	B1503	0.03
High	GKYPSWTFY	4	1	1	P04040		0	7.30077e+06	0	0.0005593	24.37	1.35965	2	1148.54	-0.386828	68.9303	0	C1203	48.15	B1503	8.6	B1503	0.17
High	HQITVLHVY	24	1	1	Q9NYP7		0	3.10195e+07	0	1.738e-05	24.07	1.04223	2	1109.61	0.0502798	47.0692	0	C1203	40.74	B1503	3.8	B1503	0.03
High	EIAEAYLGYPV	5	1	1	P08107		0	2.2636e+07	0	1.639e-07	24.03	1.42846	2	1224.61	-0.140247	82.6401	0		0	A6802	22.5	A6802	0.25
High	RKNPVTSTY	18	1	1	Q13131		0	3.90039e+07	0	0.002947	24.02	1.36656	2	1065.57	-0.790759	24.5252	0	C1203	48.15	B1503	5.4	B1503	0.06
High	ISPSHIWIF	12	1	1	O94915		0	1.35956e+07	0	0.0006044	24.02	1.00456	2	1099.59	-0.423905	80.6505	0	C1203	66.67	B1503	394.8	C1203	3
High	RSFHEVREF	7	1	1	Q92963		0	1.11786e+07	0	0.0003954	24	1.9553	3	1206.6	-0.0814442	31.8102	0	C1203	74.07	B1503	7.4	B1503	0.12
High	LSFPTTKTYF	8	1	1	P69905		0	1.62198e+07	0	2.182e-05	23.98	1.75956	2	1204.62	-0.571293	69.7175	0	C1203	65.71	B1503	26.3	C1203	0.5
High	YAYPYSYYY	4	1	1	Q96PV6		0	1.61724e+07	0	0.0008596	23.96	0.447394	2	1252.52	0.113123	75.9184	0	C1203	88.89	C1203	2.9	C1203	0.01
High	mTSEIHNTV	34	1	1	O43264	M1(Oxidation)	0	2.57207e+07	0	0.0007974	23.94	1.10377	2	1047.48	-0.572796	26.8555	0	C1203	77.78	A6802	2.4	A6802	0.01
High	EIFSRGPYSV	1	1	1	Q7LBC6		0	1.02592e+07	0	0.001788	23.92	1.5681	2	1154.58	-0.47429	58.0528	0	C1203	40	A6802	25.9	A6802	0.25
High	RKVKNSQSF	5	1	1	P54920		0	3.26411e+06	0	0.001177	23.87	0.920908	2	1093.61	-0.275955	17.2877	0	C1203	29.63	B1503	5.1	B1503	0.06
High	RQLPGSQRY	11	1	1	Q96BD0		0	4.97045e+06	0	0.002947	23.51	1.78552	2	1104.59	-0.80381	27.2509	0	C1203	44.44	B1503	3.1	B1503	0.01
High	ETFNTPAmYV	15	7	7	Q9BYX7;P60709;P63261;Q6S8J3;A5A3E0;P0CG38;P0CG39	M8(Oxidation)	0	1.45848e+08	0	3.818e-06	23.46	0.873232	2	1188.52	-0.290268	69.5418	0	C1203	48.57	A6802	4.3	A6802	0.01
High	YSYWTKNGV	5	1	1	Q9Y639		0	6.07243e+06	0	0.0001421	22.95	1.55925	2	1117.53	-0.87717	48.8681	0	C1203	74.07	A6802	11.6	A6802	0.09
High	RKAPPNYAM	11	1	1	Q92541		0	7.1147e+06	0	0.002947	22.35	2.38924	2	1047.54	-0.590698	26.5365	0	C1203	40.74	B1503	18.7	B1503	0.5
High	YMSGYHTGY	1	1	1	Q16637		0	5.56269e+06	0	5.477e-06	22	0.459652	2	1078.43	-0.909372	39.6382	0	C1203	48.15	B1503	5.3	B1503	0.06
High	EIFADPRTV	4	1	1	Q92871		0	3.52748e+07	0	0.002947	21.75	3.54556	2	1047.55	-0.298642	54.7803	0	C1203	51.85	A6802	96.6	A6802	0.8
High	FAWPKILKI	4	2	2	Q9H4G0;O43491		0	1.33641e+07	0	5.247e-05	21.74	0.329248	2	1115.7	0.0521061	76.4021	0	C1203	85.19	C1203	14	C1203	0.04
High	HVFDHPWETV	16	1	1	Q9Y3B1		0	2.15599e+07	0	0.001576	21.53	2.7121	2	1266.59	0.398346	56.6592	0	C1203	37.14	A6802	16.8	A6802	0.15
High	FSYVTPRAF	11	1	1	Q9Y4E8		0	8.37831e+06	0	0.0004323	21.27	2.38864	2	1087.56	0.144613	62.6653	0	C1203	74.07	B1503	3.4	C1203	0.01
High	RQVGATVEF	17	1	1	Q13432		0	2.85643e+07	0	0.002947	21.11	3.27985	2	1006.53	-0.371276	44.7338	0	C1203	40.74	B1503	2.7	B1503	0.01
High	EVFPLAMNYL	15	3	3	P24385;P30279;P30281		0	1.56414e+07	0	3.297e-05	20.93	3.10503	2	1196.6	-0.377069	100.878	0	C1203	40	A6802	11.2	A6802	0.09
High	FAFDPSVNY	10	1	1	Q8IYM9		0	4.98082e+06	0	0.002947	20.77	1.94391	2	1059.48	-0.368576	78.5945	0	C1203	88.89	C1203	6.3	C1203	0.01
High	AMRIGAEVY	14	2	2	P06733;P13929		0	1.17383e+07	0	0.00241	20.54	2.88635	2	1009.51	-0.467728	49.2727	0	C1203	44.44	B1503	7.4	B1503	0.12
High	RKKDGQVTF	6	1	1	Q9BW60		0	9.49115e+06	0	4.861e-06	20.54	2.24391	2	1078.6	-0.255929	20.4504	0	C1203	40.74	B1503	13.9	B1503	0.4
High	FQKVITEY	9	1	1	Q7KZF4		0	8.72587e+06	0	3.863e-05	20.14	3.42916	2	1027.55	-0.431655	47.1416	0	C1203	56.67	B1503	31.7	B1503	0.8
High	KKNKDNVKF	6	1	1	P63173		0	3.12853e+06	0	3.005e-05	19.95	1.8173	2	1120.65	-0.204324	17.4203	0	C1203	33.33	B1503	66.5	B1503	1.4
High	KKFSDSVKSTF	10	1	1	Q9ULG6		0	4.16898e+07	0	0.0001398	19.82	4.88065	3	1273.68	-0.324616	33.0676	0		0	B1503	37.2	B1503	0.9
High	YSYPELVKM	10	1	1	Q96MH7		0	1.94968e+07	0	2.809e-06	19.1	4.15954	2	1129.56	-0.0896973	65.9702	0	C1203	77.78	C1203	7.5	C1203	0.01
High	KKIEFGVVY	6	1	1	P29218		0	8.70116e+06	0	0.002947	19.04	2.39248	2	1082.62	-0.848444	49.4846	0	C1203	48.15	B1503	3.5	B1503	0.03
High	RKDLFIATY	2	1	1	P32121		0	7.13288e+06	0	0.000564	18.8	3.76626	2	1126.62	-0.781016	50.743	0	C1203	44.44	B1503	25.2	B1503	0.7
High	QTYGYEHIL	7	1	1	Q96AX1		0	3.82192e+07	0	0.001234	18.63	5.60759	2	1123.54	-0.167083	56.5528	0	C1203	74.07	A6802	117	A6802	0.9
High	YTFFTPNNI	29	1	1	P17844		0	4.26235e+08	0	0.002739	18.36	4.83451	2	1116.54	0.106679	82.9324	0	C1203	70.37	A6802	11.5	C1203	0.04
High	RKFPGRPEEEY	5	1	1	Q9NUQ8		0	17989851	0	0.002947	18.26	6.35184	3	1407.7	-0.497583	32.0474	0		0	B1503	167.2	B1503	3
High	FSQDHLVIY	12	1	1	Q9BW91		0	4.85979e+07	0	3.18e-06	17.98	7.12354	2	1121.56	-0.274476	61.0204	0	C1203	77.78	C1203	13.8	C1203	0.04
High	KHQPHKVTQY	21	2	2	P83881;Q969Q0		0	1.1475e+07	0	0.002947	17.74	5.96844	2	1265.68	0.114664	17.7071	0	C1203	31.43	B1503	59.5	B1503	1.3
High	YKEDHPFEY	2	1	1	Q9H0R8		0	8.31041e+06	0	0.001108	17.69	2.58132	2	1227.53	-0.52776	41.2612	0	C1203	51.85	B1503	78.6	B1503	1.6
High	VKPRYGLVTY	6	1	1	P00751		0	1.6743e+07	0	0.002947	17.3	3.54728	2	1195.68	-0.513885	43.3513	0	C1203	28.57	B1503	35.5	B1503	0.9
High	HQKKEFVKY	4	1	1	Q9BUL8		0	3.62463e+06	0	0.0005849	17.23	5.26923	3	1206.66	0.073154	20.6049	0	C1203	40.74	B1503	10	B1503	0.2
High	FKWSGENSY	12	1	1	Q8NI08		0	1.44774e+07	0	7.533e-05	16.48	4.13039	2	1117.49	-0.337241	50.6818	0	C1203	44.44	B1503	6.8	B1503	0.12
High	GKFDWRQQY	19	1	1	Q8N766		0	2.4381e+07	0	2.598e-05	15.29	12.4577	2	1227.59	-0.255574	46.1346	0	C1203	44.44	B1503	19.2	B1503	0.5
High	DSFPYEFFQV	5	1	1	Q04864		0	5.55003e+06	0	0.002947	13.36	10.2436	2	1278.57	0.0198051	106.228	0	C1203	57.14	A6802	16.8	A6802	0.15
High	RKFSENPHVY	3	1	1	O75319		0	1.02067e+07	0	0.0002502	13.19	23.5213	3	1276.64	0.0104957	29.0787	0	C1203	48.57	B1503	9.6	B1503	0.2
High	TASPVIKAV	30	1	1	Q8WU10		0	2.62564e+08	0.001	0.002947	51.32	0.00184365	2	885.54	-0.400477	38.6689	0	C1203	92.59	C1203	69.4	C1203	0.4
High	VAADIAVQL	4	1	1	P08240		0	8.22173e+06	0.001	0.003911	50.7	0.00229892	2	899.519	-0.350806	70.5856	0	C1203	88.89	C1203	35.1	C1203	0.15
High	AQTDPTTGY	2	1	1	Q9Y4K0		0	7.29175e+06	0.001	0.002947	50.41	0.00279662	2	953.421	0.295758	37.3613	0	C1203	44.44	B1503	8.6	B1503	0.17
High	VAAPQVQQV	17	1	1	Q12772		0	2.99465e+07	0.001	0.002947	50.01	0.00264889	2	939.526	-0.114846	47.4754	0	C1203	92.59	C1203	74	C1203	0.4
High	STYQGERAY	1	1	1	Q92900		0	2.02218e+06	0.001	0.005663	49.61	0.00245812	2	1074.48	-0.499431	29.552	0	C1203	74.07	B1503	18.4	C1203	0.12
High	GQAPPGKAL	21	1	1	A8MPP1		0	3.45328e+07	0.001	0.005722	49.35	0.00295008	2	838.478	-0.0540531	26.0007	0	C1203	51.85	B1503	25.1	B1503	0.7
High	AQKPFGATY	23	1	1	Q96QD5		0	4.67342e+07	0.001	0.002947	46.71	0.00847992	2	982.499	-0.28631	39.2182	0	C1203	51.85	B1503	2.7	B1503	0.01
High	LISGVVHEI	2	1	1	O43462		0	8.19894e+06	0.001	0.002947	46.35	0.00447025	2	966.562	-0.215396	54.4707	0	C1203	44.44	A6802	73.6	A6802	0.6
High	AQMAQILSF	10	1	1	P35237		0	9.58277e+06	0.001	0.002947	46.22	0.00910592	2	1008.52	-0.0944204	83.5548	0	C1203	40.74	B1503	2	B1503	0.01
High	AQVDPLSAL	1	1	1	Q9UL63		0	2.32525e+06	0.001	0.004016	45.45	0.00967065	2	913.499	0.24281	75.6882	0	C1203	44.44	B1503	10.8	B1503	0.25
High	IAVNAVLTV	10	1	1	P48643		0	1.68088e+07	0.001	0.005355	45.39	0.00575101	2	899.556	-0.62558	75.5046	0	C1203	85.19	C1203	15.6	C1203	0.05
High	VKEGVSAAF	2	1	1	Q7L1Q6		0	5.55789e+06	0.001	0.004381	45.21	0.0116769	2	907.487	-1.36875	39.7066	0	C1203	37.04	B1503	24.8	B1503	0.6
High	TSYPDPILL	14	1	1	P50591		0	3.98323e+07	0.001	0.002947	44.72	0.0130378	2	1018.55	-0.530945	83.1035	0	C1203	85.19	C1203	34.2	C1203	0.15
High	GKVPVVVSY	5	1	1	Q9Y4C4		0	9.24548e+06	0.001	0.003272	44.61	0.00901345	2	947.556	-0.45451	49.784	0	C1203	51.85	B1503	14.5	B1503	0.4
High	KKTGKTVSY	4	1	1	O00244		0	5.70825e+06	0.001	0.002947	44.41	0.00681198	2	1011.58	-0.654519	16.6239	0	C1203	44.44	B1503	19.2	B1503	0.5
High	TTVDINTQV	16	1	1	Q14676		0	1.47539e+08	0.001	0.002947	44.16	0.0152274	2	990.51	-0.627133	54.1814	0	C1203	70.37	A6802	3.9	A6802	0.01
High	KASPLTFTV	9	1	1	P09884		0	5.27502e+07	0.001	0.002947	44.03	0.0113193	2	963.551	-0.369007	57.4647	0	C1203	88.89	C1203	66.2	C1203	0.3
High	FVGYFPATV	11	1	1	Q9HCE1		0	1.63103e+07	0.001	0.002947	43.74	0.0158881	2	1000.51	-0.161743	82.3481	0	C1203	48.15	C1203	25	C1203	0.1
High	SKMSELQTY	1	1	1	P49454		0	3.42279e+06	0.001	0.002947	43.41	0.012744	2	1086.51	-0.920798	40.7853	0	C1203	44.44	B1503	6.3	B1503	0.09
High	GKAPGAEEY	22	1	1	P09543		0	3.42646e+07	0.001	0.002947	43.21	0.0247575	2	921.431	-0.551972	26.2171	0	C1203	51.85	B1503	62.4	B1503	1.4
High	NSYGSHRTL	8	1	1	Q9Y446		0	5.52987e+06	0.001	0.003971	42.34	0.0244609	2	1034.5	-0.364561	21.9969	0	C1203	81.48	C1203	59.7	C1203	0.3
High	KKNPSSPLY	7	1	1	O95478		0	4.89541e+06	0.001	0.002947	42.09	0.0244209	2	1033.57	-0.616409	25.0461	0	C1203	44.44	B1503	9.4	B1503	0.17
High	LSAGATRVY	1	2	2	P60891;P21108		0	3.2463e+06	0.001	0.00309	42.07	0.0197809	2	937.51	-0.142863	37.1244	0	C1203	81.48	B1503	17.8	C1203	0.1
High	EVFGHAIKA	10	1	1	P54136		0	3.22319e+07	0.001	0.002947	42.04	0.021259	2	971.53	-1.20385	36.076	0	C1203	11.11	A6802	17.5	A6802	0.17
High	NAFASVILF	27	1	1	P26641		0	9.27569e+07	0.001	0.002947	41.95	0.0208648	2	981.54	-0.361308	97.7308	0	C1203	77.78	B1503	16.9	C1203	0.2
High	AVIGDVIRV	2	1	1	Q9NR30		0	8.70002e+06	0.001	0.005529	41.18	0.0127458	2	941.578	-0.165623	63.8089	0	C1203	51.85	A6802	201.7	A6802	1.3
High	SVADVVRFI	2	1	1	Q9UHJ3		0	4.87063e+06	0.001	0.002949	41.01	0.0242624	2	1005.57	-0.191831	75.8606	0	C1203	44.44	A6802	12.3	A6802	0.1
High	VAFSQVLTI	14	1	1	Q13487		0	7.92203e+06	0.001	0.002947	40.91	0.0191671	2	977.566	-0.451726	86.1616	0	C1203	88.89	C1203	13.1	C1203	0.04
High	FTAGIVEAVL	5	1	1	Q8IUR0		0	3.94923e+07	0.001	0.005514	40.33	0.0272998	2	1019.58	-0.453629	88.0112	0	C1203	60	A6802	14.2	A6802	0.12
High	TAYPQVVVV	37	1	1	Q9ULI2		0	1.50917e+08	0.001	0.002947	40.22	0.0413941	2	975.551	0.0211718	69.6993	0	C1203	96.3	C1203	11.6	C1203	0.03
High	GKLQKTVSY	9	1	1	P12757		0	4.31645e+06	0.001	0.002947	39.99	0.0209181	2	1023.58	-0.408329	26.7264	0	C1203	40.74	B1503	16.5	B1503	0.4
High	FAFEEAIGY	8	1	1	Q96G03		0	1.02311e+07	0.001	0.002947	39.24	0.034552	2	1046.48	0.094149	84.1171	0	C1203	88.89	B1503	11.7	C1203	0.04
High	GQKPGGSDF	23	2	2	P56211;O43768		0	1.75122e+08	0.001	0.003029	39.04	0.0463902	2	892.416	-0.375747	24.5305	0	C1203	37.04	B1503	11.1	B1503	0.25
High	TAAQVARVL	2	1	1	A5YKK6		0	2.27016e+07	0.001	0.002948	38.99	0.0338864	2	928.557	-0.667671	42.1582	0	C1203	85.19	C1203	91	C1203	0.5
High	NSASIFNTL	10	1	1	Q96HU1		0	1.76668e+07	0.001	0.005006	38.98	0.048041	2	966.489	-0.251565	74.7833	0	C1203	77.78	A6802	11.8	A6802	0.1
High	GVVDIFQTV	31	2	2	P23468;Q13332		0	6.48825e+07	0.001	0.002947	38.64	0.0653432	2	977.53	-0.261311	87.586	0	C1203	44.44	A6802	54.5	A6802	0.5
High	ISAPLVKTL	19	1	1	P30305		0	26975160	0.001	0.002947	38.58	0.0170224	2	941.602	-0.612476	55.6978	0	C1203	88.89	C1203	53.8	C1203	0.25
High	GKYAVIGTY	1	1	1	Q5JSH3		0	2.86854e+06	0.001	0.005709	38.29	0.0596343	2	971.519	-0.670875	48.6746	0	C1203	48.15	B1503	8.2	B1503	0.15
High	TTADPFVKV	6	1	1	Q8IV01		0	9.85547e+06	0.001	0.004144	38.18	0.071709	2	977.53	-0.323749	50.6878	0	C1203	77.78	A6802	3.5	A6802	0.01
High	RQAPTGLGL	28	1	1	Q9BX59		0	4.25161e+07	0.001	0.002947	37.98	0.024114	2	912.525	-0.75838	43.5888	0	C1203	51.85	B1503	6.2	B1503	0.09
High	YASDVQLIL	4	1	1	Q8NHQ8		0	9.39934e+07	0.001	0.004972	37.87	0.0510655	2	1021.56	-0.504621	81.4198	0	C1203	88.89	C1203	14.4	C1203	0.05
High	KGFPHVIYA	12	1	1	Q13485		0	33653126	0.001	0.002947	37.83	0.0568039	2	1031.57	-0.594543	45.8656	0	C1203	18.52	C1203	414.1	C1203	1.5
High	KAFSVVIQA	8	1	1	Q16533		0	1.4288e+07	0.001	0.002947	37.61	0.0370947	2	962.567	0.0123266	53.7428	0	C1203	51.85	C1203	583.4	C1203	1.8
High	KTASINQNV	9	1	1	Q8NI77		0	1.10738e+07	0.001	0.002947	37.53	0.0815291	2	974.526	-0.473758	26.1527	0	C1203	74.07	A6802	59.5	A6802	0.6
High	TSSKVIQSV	7	1	1	O14976		0	1.13737e+07	0.001	0.004307	37.47	0.0443712	2	948.536	-0.142356	32.0479	0	C1203	74.07	A6802	72.9	A6802	0.6
High	AAFAYTVKY	20	1	1	Q8N2K1		0	2.99447e+08	0.001	0.003001	37.42	0.0877141	2	1033.54	0.112903	55.785	0	C1203	85.19	B1503	6.5	B1503	0.1
High	QVFPGLLERV	3	1	1	Q9UBB4		0	2.21916e+07	0.001	0.002947	37.18	0.0499334	2	1157.67	0.0975914	73.4853	0	C1203	40	A6802	53.3	A6802	0.5
High	GKAFSQSSY	13	3	3	Q9UNY5;Q8NF99;Q9NQZ8		0	1.51684e+07	0.001	0.00297	37.04	0.0718233	2	974.458	-0.1253	30.7359	0	C1203	40.74	B1503	14.1	B1503	0.4
High	RKVPGVTAI	6	3	3	Q06787;P51114;P51116		0	2.66874e+07	0.001	0.002947	36.97	0.0183832	2	940.593	-0.413438	34.5624	0	C1203	40.74	B1503	21.4	B1503	0.6
High	ETTSISKITV	8	1	1	P51587		0	2.57819e+07	0.001	0.003156	36.78	0.0551601	2	1078.6	-0.815104	47.6962	0	C1203	40	A6802	8.3	A6802	0.06
High	FSVVPSPKV	6	4	4	Q13509;P04350;P68371;P07437		0	1.55055e+07	0.001	0.002986	36.53	0.0979146	2	959.556	0.240437	56.0619	0	C1203	70.37	A6802	122.4	C1203	0.8
High	DVARISWYL	8	1	1	Q13011		0	1.09741e+07	0.001	0.003068	36.45	0.0849921	2	1122.59	-0.304323	81.0779	0	C1203	40.74	A6802	8	A6802	0.05
High	AAFPYGGVL	8	1	1	Q6PCD5		0	1.15106e+07	0.001	0.002947	36.36	0.124169	2	894.472	-0.123993	80.0807	0	C1203	92.59	C1203	22.1	C1203	0.09
High	GKAWGILTF	19	1	1	P82930		0	1.29227e+07	0.001	0.002947	36.31	0.0694752	2	992.556	-0.233093	77.9893	0	C1203	44.44	B1503	9	B1503	0.17
High	KAFGWPSSL	12	1	1	Q9HAH1		0	3.58974e+07	0.001	0.002947	36.17	0.101256	2	992.52	-0.158461	65.6985	0	C1203	85.19	C1203	8.6	C1203	0.01
High	EVISKLYAV	35	1	1	P50990		0	9.77662e+08	0.001	0.003069	36	0.0349278	2	1021.59	-0.875845	57.8555	0	C1203	40.74	A6802	3	A6802	0.01
High	MALGHVIVL	4	1	1	Q9NVR2		0	1.47288e+07	0.001	0.002947	35.99	0.0247236	2	952.564	-0.538175	70.4501	0	C1203	88.89	C1203	18.4	C1203	0.07
High	NTIPLFVQL	23	2	2	P35222;P14923		0	7.04753e+07	0.001	0.002947	35.98	0.0891167	2	1044.61	-0.504815	96.1353	0	C1203	77.78	A6802	11.3	A6802	0.09
High	ETFPANIQV	49	1	1	Q5VYK3		0	4.4976e+08	0.001	0.002947	35.63	0.158358	2	1018.52	-0.537324	72.1172	0	C1203	81.48	A6802	3.5	A6802	0.01
High	LQAPPLTSL	14	1	1	Q96EX3		0	1.10156e+07	0.001	0.002959	35.6	0.0454035	2	939.551	-0.118584	73.891	0	C1203	48.15	B1503	6.8	B1503	0.12
High	VKVVPTVY	12	1	1	Q9Y282		0	1.25925e+07	0.001	0.002947	35.45	0.0472984	2	904.55	-0.317222	48.7378	0	C1203	36.67	B1503	272.9	B1503	3.5
High	SKYAADRNHY	4	1	1	P67809		0	4.32084e+06	0.001	0.007034	35.28	0.105326	3	1224.58	0.0955136	20.2276	0	C1203	31.43	B1503	31.6	B1503	0.8
High	ETADVIAKV	30	1	1	O43617		0	1.04895e+09	0.001	0.004932	35.09	0.121512	2	945.524	-1.15899	44.3411	0	C1203	77.78	A6802	2	A6802	0.01
High	AAYQSVRIL	11	1	1	Q9HAT2		0	4.83891e+07	0.001	0.005031	34.86	0.0821205	2	1020.58	-0.56326	53.1316	0	C1203	88.89	C1203	33	C1203	0.15
High	TTVEDLGSKI	11	1	1	P35613		0	1.40512e+07	0.001	0.003356	34.81	0.118718	2	1062.57	-0.44511	52.6056	0	C1203	31.43	A6802	91	A6802	0.7
High	AAFPGASLY	16	1	1	Q15038		0	1.73183e+07	0.001	0.004126	34.69	0.170916	2	896.451	-0.205138	71.3264	0	C1203	88.89	B1503	5.3	C1203	0.01
High	RQLPAMTAL	13	1	1	Q13045		0	5.71283e+07	0.001	0.002947	34.49	0.0833955	2	1000.56	-0.0326673	54.3927	0	C1203	44.44	B1503	4.8	B1503	0.05
High	ETSGIGEARV	9	1	1	P61764		0	9.29839e+07	0.001	0.00296	34.42	0.165544	2	1018.52	-1.03472	35.2224	0	C1203	42.86	A6802	10.9	A6802	0.08
High	RQYEQQTY	2	1	1	Q9Y262		0	1.9185e+08	0.001	0.003218	33.83	0.100643	2	1115.51	-0.526551	28.5841	0	C1203	26.67	B1503	5.5	B1503	0.07
High	GQNKKVMIY	24	2	2	Q14839;Q8TDI0		0	7.8579e+07	0.001	0.003643	33.67	0.104592	2	1080.59	-0.779263	28.8165	0	C1203	40.74	B1503	9.1	B1503	0.17
High	VAINHIVDF	20	1	1	P78346		0	4.35336e+07	0.001	0.002947	33.51	0.146977	2	1027.56	-0.569454	66.3826	0	C1203	77.78	B1503	12.9	B1503	0.3
High	GKMNPQSAF	7	1	1	P22307		0	8.53012e+06	0.001	0.003785	33.44	0.131816	2	979.467	-0.0316161	37.5568	0	C1203	29.63	B1503	6	B1503	0.08
High	KATAYILSV	6	1	1	P01106		0	2.10163e+07	0.001	0.00675	33.4	0.0609984	2	965.567	0.058711	56.8625	0	C1203	81.48	C1203	52.2	C1203	0.25
High	EVFGVIRSL	14	1	1	Q15393		0	2.2057e+07	0.001	0.002947	33.25	0.121174	2	1019.59	-0.153852	69.9295	0	C1203	51.85	A6802	24.5	A6802	0.25
High	LQQPRSLTY	15	1	1	P22102		0	2.89179e+07	0.001	0.002947	33.19	0.175606	2	1105.6	-0.807352	44.5961	0	C1203	51.85	B1503	2.4	B1503	0.01
High	SAYANAKKY	8	1	1	O60524		0	1.98549e+06	0.001	0.002947	32.81	0.22486	2	1015.52	-0.363355	21.1515	0	C1203	81.48	C1203	27.9	C1203	0.12
High	LSADIFQQV	2	1	1	O94916		0	3.98726e+07	0.001	0.006632	32.65	0.289878	2	1020.54	-0.261725	79.2179	0	C1203	74.07	A6802	15.5	A6802	0.15
High	LAAYHPWVV	29	1	1	Q5TA50		0	8.32475e+07	0.001	0.002947	32.63	0.119357	2	1055.57	-0.234092	64.7618	0	C1203	85.19	C1203	54.8	C1203	0.25
High	SKKPESTSF	13	1	1	Q9BT25		0	1.09484e+07	0.001	0.002947	32.4	0.174876	2	1010.51	-0.63855	21.0449	0	C1203	37.04	B1503	11.3	B1503	0.25
High	GQFSKPFSF	4	1	1	P35658		0	4.50446e+06	0.001	0.002947	32.39	0.181854	2	1044.51	-0.594989	62.3159	0	C1203	40.74	B1503	2.8	B1503	0.01
High	KQVKYFIHY	6	1	1	Q9UBU8		0	7.13339e+06	0.001	0.002947	32.13	0.173418	3	1225.67	-0.0719385	38.1016	0	C1203	40.74	B1503	3.2	B1503	0.02
High	GKGKFGNVY	8	3	3	O14965;Q96GD4;Q9UQB9		0	2.54499e+07	0.001	0.003575	31.96	0.218867	2	969.515	-0.477758	27.5374	0	C1203	40.74	B1503	27.1	B1503	0.7
High	HKVETFSGVY	9	1	1	P62081		0	1.08852e+07	0.001	0.00362	31.88	0.274794	2	1166.58	-1.08867	39.1935	0	C1203	34.29	B1503	11.8	B1503	0.25
High	GQRKPATSY	40	1	1	P46779		0	3.87318e+08	0.001	0.002947	31.54	0.270516	2	1007.53	-0.482879	19.6948	0	C1203	37.04	B1503	5	B1503	0.05
High	TTYDLTHTL	5	1	1	Q9NTJ5		0	1.37417e+07	0.001	0.002947	31.52	0.356786	2	1064.53	-0.0722062	56.001	0	C1203	77.78	A6802	10.1	C1203	0.04
High	RQIGSRSY	10	1	1	P51114		0	3.39419e+07	0.001	0.003309	31.37	0.248234	2	966.511	-0.503189	21.9145	0	C1203	30	B1503	7.2	B1503	0.12
High	LKDPDSNPY	3	2	2	P51114;P51116		0	3.52355e+06	0.001	0.003174	31.22	0.34032	2	1048.49	-0.393971	34.9672	0	C1203	44.44	B1503	164.7	B1503	2.5
High	GKSSVIQVF	13	1	1	Q8WVC6		0	1.58988e+07	0.001	0.002984	31.14	0.21278	2	964.546	0.126466	54.0003	0	C1203	44.44	B1503	11.5	B1503	0.25
High	AEWSSKTSY	2	1	1	Q9BT92		0	2.07132e+06	0.001	0.002947	31.03	0.202619	2	1058.48	-0.472515	37.8514	0	C1203	44.44	B1503	10.8	B1503	0.25
High	KKAKAGEKY	1	1	1	P09884		0	272848	0.001	0.00413	30.79	0.140225	2	1022.6	-0.477004	15.6295	0	C1203	40.74	B1503	70.5	B1503	1.5
High	AQLPEKVEY	15	1	1	P51532		0	5.80205e+07	0.001	0.002947	30.76	0.44504	2	1076.56	-0.215485	46.6142	0	C1203	55.56	B1503	11.1	B1503	0.25
High	ETFFGVQWV	9	1	1	P32970		0	2.6152e+07	0.001	0.004347	30.69	0.282973	2	1112.54	-0.755477	100.903	0	C1203	74.07	A6802	4.1	A6802	0.01
High	EAAEVILRV	52	1	1	P78371		0	2.55073e+09	0.001	0.002947	30.67	0.216788	2	999.583	-0.692389	58.7705	0	C1203	88.89	A6802	7.3	A6802	0.05
High	TKYNSPTNF	1	1	1	Q8TCB0		0	5.34696e+06	0.001	0.002947	30.66	0.283603	2	1071.51	0.203905	38.7113	0	C1203	37.04	B1503	5.8	B1503	0.07
High	STIFPLDGV	4	1	1	O60318		0	3.74326e+06	0.001	0.005832	30.64	0.406722	2	948.503	-0.398315	85.6534	0	C1203	66.67	A6802	3.5	A6802	0.01
High	KAYGASKTF	9	1	1	P27694		0	5.11473e+06	0.001	0.002947	30.22	0.46765	2	972.514	-0.503236	23.7812	0	C1203	81.48	B1503	4.7	B1503	0.05
High	QGFPNRVVF	20	1	1	P35579		0	1.768e+08	0.001	0.002947	30.22	0.357903	2	1063.57	-0.788684	60.9483	0	C1203	48.15	B1503	44.9	B1503	1.1
High	YVTSILQSL	8	1	1	Q69YN4		0	1.54584e+07	0.001	0.003482	30.03	0.189238	2	1023.57	-0.399022	85.4631	0	C1203	44.44	C1203	20.8	C1203	0.08
High	NFFPGVFEY	8	1	1	Q76I76		0	1.04121e+07	0.001	0.003389	29.94	0.339559	2	1119.51	-0.0333484	96.418	0	C1203	55.56	B1503	160.9	C1203	1.9
High	ETFSSYISV	6	1	1	A5PLN9		0	3.71694e+07	0.001	0.006486	29.78	0.369133	2	1032.49	-0.345371	76.0152	0	C1203	77.78	A6802	3	A6802	0.01
High	SQGSFPEHY	9	1	1	Q9HBH0		0	2.73671e+07	0.001	0.002947	29.78	0.181989	2	1051.45	-1.32246	39.5492	0	C1203	44.44	B1503	21.3	B1503	0.6
High	TVFSHAQTV	6	2	2	Q71UM5;P42677		0	9.22738e+07	0.001	0.00491	29.49	0.555049	2	989.505	-0.419431	37.2663	0	C1203	48.15	C1203	18	C1203	0.06
High	SKCFGFVSY	5	2	2	Q92879;O95319		0	9.47205e+06	0.001	0.0031	29.3	0.399171	2	1037.48	-0.342845	64.5941	0	C1203	40.74	B1503	11.8	B1503	0.25
High	GKYGSSLEF	8	1	1	P55212		0	1.85917e+07	0.001	0.002947	29.03	0.478724	2	987.478	-0.210023	49.867	0	C1203	44.44	B1503	3.6	B1503	0.03
High	QKLIFTVGY	2	1	1	Q8TDB6		0	1.70848e+07	0.001	0.002947	29.01	0.289955	2	1068.61	-0.255653	66.6068	0	C1203	40.74	B1503	41.1	B1503	1
High	RKIGDTSVSY	17	1	1	P20700		0	2.55155e+07	0.001	0.00307	28.97	0.426565	2	1125.59	-0.551092	34.8672	0	C1203	37.14	B1503	11	B1503	0.25
High	QFTGIKKY	6	1	1	Q96IX5		0	1.65287e+07	0.001	0.002947	28.77	0.40001	2	984.551	-0.810143	42.9538	0	C1203	33.33	B1503	208.3	B1503	3
High	ETMNNIDRL	8	1	1	Q5T0N5		0	2.02872e+07	0.001	0.005091	28.7	0.506266	2	1105.53	-0.00366594	46.2303	0	C1203	70.37	A6802	45.3	A6802	0.4
High	YTSGPGSRI	19	1	1	P05787		0	9.33981e+07	0.001	0.003759	28.21	0.601767	2	937.474	-0.0638456	30.6883	0	C1203	70.37	A6802	79.7	C1203	0.4
High	ETFEHPNVV	21	1	1	Q00534		0	1.54389e+08	0.001	0.002947	27.7	0.559911	2	1071.51	-0.156531	46.4325	0	C1203	81.48	A6802	8.4	A6802	0.06
High	TAQTLVRIL	11	1	1	Q12905		0	1.83039e+07	0.001	0.002947	27.67	0.239402	2	1014.63	-0.89096	59.9911	0	C1203	81.48	C1203	596.3	C1203	1.9
High	EAADVWYNL	11	1	1	Q8TAM2		0	1.62551e+07	0.001	0.00302	27.6	0.593285	2	1080.5	-0.348101	82.7936	0	C1203	81.48	A6802	8.6	A6802	0.06
High	DTFDKNYKA	9	1	1	Q9BZG1		0	1.47042e+07	0.001	0.002947	27.51	0.564458	2	1101.52	-0.430149	30.1597	0	C1203	37.04	A6802	23.9	A6802	0.25
High	EVIGKITAL	17	1	1	O43264		0	28868164	0.001	0.003846	27.37	0.324686	2	943.582	-0.311034	57.3183	0	C1203	44.44	A6802	28.2	A6802	0.3
High	MMIPSQISY	9	1	1	Q04637		0	1.51069e+07	0.001	0.002947	27.27	0.575342	2	1069.51	0.182957	75.8709	0	C1203	48.15	B1503	3.1	B1503	0.01
High	RKEETVTVY	7	1	1	Q9BZX2		0	2.46945e+07	0.001	0.002947	27.13	0.625658	2	1124.59	-0.542027	29.6822	0	C1203	48.15	B1503	13.6	B1503	0.4
High	HAAHIISEL	11	1	1	Q96I24		0	3.13873e+07	0.001	0.002947	26.49	0.923021	2	990.536	-0.381393	38.8438	0	C1203	85.19	C1203	13.2	C1203	0.04
High	TKISTHVSF	18	1	1	Q8TEY7		0	1.83582e+07	0.001	0.005242	26.45	0.980138	2	1019.55	-0.420768	38.074	0	C1203	37.04	B1503	5.4	B1503	0.06
High	AQAASQHVF	6	1	1	Q9NQT4		0	1.21358e+07	0.001	0.006863	26.41	0.748991	2	958.474	-0.289818	31.7433	0	C1203	40.74	B1503	3	B1503	0.01
High	SAYDHVRKT	4	1	1	P27361		0	2.41496e+06	0.001	0.002947	26.15	1.04732	2	1076.55	-0.76945	18.784	0	C1203	51.85	C1203	264.8	C1203	1.1
High	RKVPDNQQF	10	1	1	Q9BX10		0	1.03951e+07	0.001	0.002947	26.11	1.08751	2	1131.59	-0.609718	26.8869	0	C1203	37.04	B1503	31.5	B1503	0.8
High	FTSSMRGMDAV	1	1	1	Q7L4I2		0	4.69029e+06	0.001	0.002947	26.11	0.501936	2	1201.53	0.0199045	49.7562	0		0	A6802	89.7	A6802	0.7
High	YAAGVHSVL	6	1	1	O43299		0	1.20605e+07	0.001	0.002947	25.97	1.28842	2	916.488	-0.694599	43.9889	0	C1203	88.89	C1203	7.6	C1203	0.01
High	EVFEKATFI	21	1	1	P19338		0	1.19719e+08	0.001	0.004288	25.18	0.965991	2	1083.57	-0.629925	63.2302	0	C1203	37.04	A6802	8.9	A6802	0.06
High	RKGEFETGF	2	2	2	P15170;Q8IYD1		0	5.30558e+06	0.001	0.002947	24.9	1.13517	2	1070.53	-0.392942	36.6669	0	C1203	33.33	B1503	71	B1503	1.5
High	KQFGNILIL	5	1	1	P52788		0	5.45248e+07	0.001	0.002947	24.76	0.358424	2	1045.64	-0.176841	72.5852	0	C1203	51.85	B1503	4.3	B1503	0.04
High	RKKDWKTLY	3	1	1	Q9NWZ5		0	8.21579e+06	0.001	0.002947	24.66	0.550074	3	1237.71	0.092591	28.7099	0	C1203	40.74	B1503	45.2	B1503	1.1
High	RLVEFLITY	4	1	1	Q52LW3		0	2.98921e+07	0.001	0.002947	24.4	0.682768	2	1153.66	-0.373497	79.9352	0	C1203	48.15	B1503	8.5	B1503	0.15
High	TTFEHDIQAL	8	1	1	Q01082		0	4.65043e+07	0.001	0.00469	24.15	1.55856	2	1174.57	-0.121944	59.3869	0	C1203	57.14	A6802	138.6	A6802	1
High	RQLLYITAF	3	2	2	O95298;E9PQ53		0	7.43038e+06	0.001	0.006201	24.14	0.710244	2	1124.65	-0.328706	74.8796	0	C1203	33.33	B1503	2.4	B1503	0.01
High	ETIFGEWTV	10	1	1	Q96MT1		0	2.04611e+08	0.001	0.002947	23.51	1.6848	2	1081.52	-0.595941	94.1733	0	C1203	70.37	A6802	3.8	A6802	0.01
High	RQLPSSHAL	9	1	1	Q8WV83		0	1.21571e+07	0.001	0.006131	23.4	1.10798	2	1008.56	-0.505973	28.6308	0	C1203	44.44	B1503	5.1	B1503	0.06
High	IKKEFDKKY	8	2	2	P63167;Q96FJ2		0	6.17634e+06	0.001	0.003273	23.19	1.18734	3	1198.68	0.150491	21.1973	0	C1203	44.44	B1503	197	B1503	3
High	NVFEGFYGV	4	1	1	Q9Y5Y0		0	6.96695e+06	0.001	0.006989	23.14	1.53958	2	1031.48	-0.22441	86.6393	0	C1203	44.44	A6802	2.4	A6802	0.01
High	VKAEIRQQF	2	1	1	P30154		0	4.41021e+06	0.001	0.002947	23.08	1.31448	2	1118.63	-0.727967	34.6211	0	C1203	40.74	B1503	33.2	B1503	0.8
High	KLYQEIISY	4	1	1	Q9H7D0		0	9.22489e+06	0.001	0.004344	22.99	1.52386	2	1156.62	-0.375275	61.6352	0	C1203	48.15	B1503	5.5	B1503	0.07
High	VAYWRQAGL	5	2	2	Q5VTU8;P56381		0	8.08646e+06	0.001	0.002947	22.98	1.89568	2	1063.57	-1.00883	56.2973	0	C1203	81.48	C1203	82.6	C1203	0.4
High	EVLNFDFQA	1	1	1	P04114		0	0	0.001	0.002947	22.65	2.16703	2	1082.52	0.296807	84.6451	0	C1203	0	A6802	48.5	A6802	0.5
High	ETLFPSKIGV	4	2	2	Q9H8S9;Q7L9L4		0	3.92525e+07	0.001	0.00554	22.53	1.7589	2	1090.61	-0.0329069	66.6549	0	C1203	45.71	A6802	6.4	A6802	0.04
High	ETSKYYVTI	4	2	2	P68104;Q5VTE0		0	31100896	0.001	0.006534	22.47	2.42917	2	1103.56	0.226619	53.5993	0	C1203	70.37	A6802	12.1	A6802	0.1
High	HSVYIPNKV	13	1	1	Q8TB22		0	1.23053e+07	0.001	0.005238	22.27	1.79864	2	1056.58	-0.476837	36.7299	0	C1203	70.37	A6802	20	A6802	0.17
High	QQFRNAPPF	13	1	1	O60830		0	6.68848e+07	0.001	0.002947	22.21	3.01368	2	1104.56	-0.581566	48.3127	0	C1203	33.33	B1503	2.5	B1503	0.01
High	KQLAEYRKY	9	1	1	O94955		0	3.3278e+06	0.001	0.002947	22.19	1.73545	3	1198.66	-0.7719	24.6438	0	C1203	40.74	B1503	5.7	B1503	0.07
High	HSAPFSWET	2	1	1	Q9H425		0	2.77228e+07	0.001	0.002947	21.32	1.34741	2	1061.47	-0.503127	54.1646	0	C1203	44.44	A6802	94.4	A6802	0.8
High	RHRDPQLFY	3	1	1	Q9P253		0	2.58594e+07	0.001	0.006302	21.28	3.36098	3	1231.63	-0.454538	35.4968	0	C1203	44.44	B1503	20.1	B1503	0.5
High	FQNESGSKY	7	1	1	O94806		0	2.4617e+06	0.001	0.006552	20.68	1.85678	2	1059.47	-0.366992	26.6864	0	C1203	44.44	B1503	4.6	B1503	0.04
High	QTVDIRAQL	5	1	1	Q96C10		0	2.84872e+07	0.001	0.002947	20.46	3.53682	2	1043.58	-0.499621	52.4007	0	C1203	70.37	A6802	13.7	A6802	0.12
High	SKFSHDADPEVSY	11	1	1	Q13200		0	4.37677e+07	0.001	0.003572	20.02	2.05701	3	1481.65	-1.42103	40.2509	0		0	B1503	38.7	B1503	0.9
High	RKIANSDKY	2	1	1	O75164		0	1.08546e+06	0.001	0.006503	19.85	3.17426	2	1094.59	-0.611376	18.4966	0	C1203	37.04	B1503	33.4	B1503	0.8
High	EVMEWMNNV	2	1	1	Q92598		0	8.72411e+06	0.001	0.002947	19.84	1.71088	2	1151.49	0.37907	79.9991	0	C1203	40.74	A6802	2.7	A6802	0.01
High	YTTDFIYQL	2	1	1	Q01813		0	2.71202e+07	0.001	0.002947	19.84	4.01316	2	1163.56	-0.0997997	88.1733	0	C1203	77.78	A6802	7.7	A6802	0.05
High	KEYERFSKY	6	2	2	O00148;Q13838		0	2.25427e+07	0.001	0.006102	19.67	4.85634	3	1249.62	-0.148419	28.4575	0	C1203	44.44	B1503	6	B1503	0.08
High	FTFGSKVTY	3	1	1	Q4LDE5		0	1.77369e+07	0.001	0.005007	19.57	5.34264	2	1049.53	-0.980341	57.4847	0	C1203	85.19	C1203	9.7	C1203	0.02
High	GQFGVGFYSAY	2	3	3	Q58FF6;P07900;P08238		0	6.35622e+06	0.001	0.003628	19.57	2.57416	2	1195.54	-0.173749	81.4305	0		0	B1503	10.6	B1503	0.25
High	ESSPFVERL	8	1	1	P14625		0	1.2576e+08	0.001	0.003841	19.36	5.83502	2	1063.54	-0.214119	54.7512	0	C1203	81.48	A6802	108.2	A6802	0.8
High	VQFSNHTGY	1	1	1	O00764		0	4.34912e+06	0.001	0.002947	19.26	3.27154	2	1052.48	-0.406397	38.2195	0	C1203	48.15	B1503	2.4	B1503	0.01
High	EAFDRSFEV	14	1	1	Q7Z4W1		0	241154453	0.001	0.005878	19.23	3.39511	2	1099.5	-0.537413	59.0185	0	C1203	85.19	A6802	4	A6802	0.01
High	EVHVQEETV	4	1	1	Q53GL7		0	1.47268e+07	0.001	0.002963	19.11	3.84802	2	1069.52	-0.601059	35.9998	0	C1203	40.74	A6802	238.3	A6802	1.4
High	HQFLSEQF	4	1	1	Q8TDB6		0	2.22618e+07	0.001	0.005481	19.08	4.38267	2	1035.49	-0.494549	56.5348	0	C1203	36.67	B1503	25.2	B1503	0.7
High	KKHEDVKQY	1	1	1	Q9BZD4		0	306623	0.001	0.002947	18.27	6.055	2	1174.62	-0.33198	16.5874	0	C1203	48.15	B1503	56.9	B1503	1.3
High	ELYYRAIQF	7	1	1	Q00610		0	1.51241e+07	0.001	0.002947	17.88	8.12448	2	1202.62	-0.0435492	70.2886	0	C1203	37.04	B1503	144.6	B1503	2.5
High	DIKNFPWQV	1	1	1	P09871		0	3.33727e+06	0.001	0.003075	17.75	6.82518	2	1146.59	-0.0937475	78.9824	0	C1203	40.74	A6802	359.8	A6802	1.8
High	RKIGRDQELY	3	1	1	P26639		0	6.96946e+07	0.001	0.00515	17.33	5.61345	3	1277.7	-0.0729915	27.7903	0	C1203	31.43	B1503	89.7	B1503	1.7
High	KEREKILEY	4	1	1	P15924		0	5.61901e+06	0.001	0.002947	16.35	7.29168	2	1207.67	-0.524343	30.526	0	C1203	51.85	B1503	18.8	B1503	0.5
High	FAGLVQEISF	1	1	1	P48643		0	2.87746e+06	0.001	0.006873	16.31	9.34365	2	1110.58	-0.426956	92.1462	0	C1203	65.71	B1503	441.7	B1503	4.5
High	KKREAEEVY	2	1	1	Q9Y383		0	1.73514e+06	0.001	0.002947	16.06	8.50127	2	1151.61	-0.0390335	18.9662	0	C1203	44.44	B1503	19	B1503	0.5
High	VNKKFSNQY	2	1	1	P51149		0	1.80726e+06	0.001	0.002947	15.99	8.90251	2	1127.58	-0.552923	23.9352	0	C1203	40.74	B1503	351.1	B1503	4
High	RKLDQVSQF	7	1	1	O60502		0	3.07647e+07	0.001	0.002947	15.49	9.31787	2	1120.61	-0.30162	36.1674	0	C1203	37.04	B1503	10.3	B1503	0.25
High	YQEKGVRVL	4	1	1	P61160		0	3.68417e+06	0.001	0.00629	14.97	7.92388	2	1091.62	-0.480427	34.481	0	C1203	51.85	B1503	25	B1503	0.6
High	QVFEGHTHYV	12	1	1	P35606		0	7.54649e+07	0.001	0.002947	12.85	18.1347	3	1216.57	0.0142167	36.8336	0	C1203	37.14	A6802	5.1	A6802	0.02
High	HTSDEQNHL	2	2	2	Q09028;Q16576		0	705618	0.001	0.003787	12.33	12.0993	2	1080.47	-0.221068	18.0339	0	C1203	74.07	A6802	485.9	A6802	2.5
High	EDFFARNSYV	5	1	1	P11413		0	7.96436e+06	0.001	0.002947	11.7	16.5032	2	1247.57	-0.41696	64.0886	0	C1203	31.43	A6802	258.4	A6802	1.5
High	RKAASLKSNY	3	1	1	P36578		0	2.63228e+06	0.001	0.002947	10.63	19.9505	2	1137.64	-0.341709	19.6208	0	C1203	28.57	B1503	37.6	B1503	0.9
High	KKYPEKLYF	3	1	1	Q9ULK4		0	1.1126e+07	0.001	0.005446	10.5	28.9077	3	1215.68	0.0238107	38.1057	0	C1203	44.44	B1503	7.5	B1503	0.12
High	TVARPSVPA	10	1	1	P08174		0	5.25323e+08	0.002	0.007915	61.28	0.000122434	2	897.514	-1.34328	33.9083	0	C1203	7.41	A6802	24.4	A6802	0.25
High	DLMAPQPGV	12	1	1	Q96B49		0	1.05027e+07	0.002	0.007915	47.12	0.00640978	2	927.46	-0.586331	64.9129	0	C1203	37.04	A6802	189.8	A6802	1.2
High	GQFPFPTAL	2	1	1	Q765P7		0	3.7452e+06	0.002	0.007927	46.3	0.0120118	2	977.509	-0.0618901	88.7675	0	C1203	51.85	B1503	4.7	B1503	0.05
High	DVSIINITV	4	1	1	Q96BP3		0	2.53129e+06	0.002	0.007915	46.09	0.00805647	2	973.556	-0.100921	92.6615	0	C1203	48.15	A6802	15.9	A6802	0.15
High	TVADVVLWSV	9	1	1	Q13155		0	1.9984e+07	0.002	0.008004	44.23	0.0171644	2	1088.6	-0.682815	94.4045	0	C1203	31.43	A6802	5.2	A6802	0.02
High	EIANILQEL	5	1	1	Q49AM1		0	5.54164e+06	0.002	0.007915	43.93	0.0113484	2	1042.58	-0.607335	93.0255	0	C1203	44.44	A6802	20.6	A6802	0.2
High	SQFINFPIY	3	1	1	P14625		0	4.46964e+06	0.002	0.008383	41.55	0.0253693	2	1128.57	-0.663164	93.4774	0	C1203	40.74	B1503	2.8	B1503	0.01
High	DVAQIIIRI	10	1	1	Q7L622		0	5.26914e+07	0.002	0.007808	41.18	0.00762841	2	1040.65	-0.257155	80.909	0	C1203	40.74	A6802	61.8	A6802	0.6
High	TKFETEQAL	1	2	2	Q04695;P08727		0	8.16283e+06	0.002	0.008082	40.28	0.0409058	2	1066.54	-1.95491	41.5719	0	C1203	44.44	B1503	137.4	B1503	2.5
High	KSFGSAQEF	1	1	1	P35606		0	7.80631e+06	0.002	0.007915	39.71	0.0321465	2	1000.47	-1.38715	39.2061	0	C1203	70.37	B1503	6.6	B1503	0.1
High	GKVGSQSSF	7	1	1	Q9BY84		0	3.75621e+06	0.002	0.007915	39.24	0.0414016	2	896.447	-0.0782495	25.3837	0	C1203	33.33	B1503	14.6	B1503	0.4
High	DTAPVIIFV	10	1	1	Q7Z2Z2		0	4.58248e+07	0.002	0.007915	38.48	0.0525335	2	974.556	-0.176192	98.3011	0	C1203	85.19	A6802	2.7	A6802	0.01
High	KAIATTVTY	14	1	1	O43808		0	39652552	0.002	0.007915	36.84	0.0436386	2	967.544	-1.97241	39.3613	0	C1203	81.48	B1503	5.1	B1503	0.06
High	AVTKIIAKV	9	1	1	P49419		0	7.00172e+06	0.002	0.007919	36.52	0.00772153	2	942.634	-0.442794	35.2044	0	C1203	44.44	A6802	157.5	A6802	1.1
High	FTSSRHTVV	7	1	1	Q9NZ01		0	1.3468e+07	0.002	0.007915	36.25	0.0989574	2	1033.54	-1.55789	24.3703	0	C1203	81.48	C1203	12.9	C1203	0.04
High	GKTSLITRF	3	2	2	P20340;Q9NRW1		0	9.44748e+06	0.002	0.007915	35.94	0.0380242	2	1022.6	-1.3723	40.0519	0	C1203	37.04	B1503	55.1	B1503	1.2
High	QKAPDGKSY	4	1	1	Q9HBL8		0	2.48972e+06	0.002	0.007263	35.87	0.11537	2	993.5	-0.0349637	19.6168	0	C1203	51.85	B1503	67.6	B1503	1.4
High	KAISGVHTV	21	2	2	Q2VIR3;P41091		0	4.61985e+07	0.002	0.007915	35.51	0.0547618	2	911.53	-0.535576	23.9674	0	C1203	85.19	C1203	29.8	C1203	0.12
High	AAISHGRVF	9	1	1	Q9NRX2		0	1.03416e+07	0.002	0.007915	35.36	0.107929	2	957.526	-0.557436	31.3416	0	C1203	81.48	B1503	6.2	B1503	0.09
High	AAYGNVIVA	3	1	1	Q8NFZ4		0	1.69064e+07	0.002	0.008145	34.67	0.16309	2	877.478	0.0689898	58.1267	0	C1203	59.26	C1203	60.8	C1203	0.3
High	AQPETRVSY	11	1	1	Q5SWA1		0	4.6281e+07	0.002	0.007915	34.63	0.13056	2	1050.52	-1.57856	33.6886	0	C1203	48.15	B1503	10.6	B1503	0.25
High	EVADFLIKA	8	2	2	Q8IWZ3;O75179		0	7.09563e+07	0.002	0.007915	34.33	0.134382	2	1005.56	-0.374393	66.6145	0	C1203	11.11	A6802	5.8	A6802	0.03
High	ASYSGLMRI	1	1	1	Q13098		0	8.79722e+06	0.002	0.007915	34.04	0.123445	2	997.513	-0.402143	58.0965	0	C1203	70.37	C1203	50.5	C1203	0.25
High	TVVEPYNATL	2	10	10	Q13885;Q9BVA1;Q13509;P04350;P68371;P07437;Q9BUF5;A6NNZ2;Q3ZCM7;A6NKZ8		0	8179762	0.002	0.007915	33.69	0.197833	2	1106.57	-0.375941	64.3113	0	C1203	34.29	A6802	107.5	A6802	0.8
High	FASTILHLV	13	1	1	P61803		0	3.44433e+07	0.002	0.007915	33.13	0.179703	2	1000.58	-0.247132	72.7572	0	C1203	81.48	A6802	5.7	A6802	0.03
High	YTYGQGTYGA	2	1	1	Q92841		0	7.69098e+06	0.002	0.007915	33.11	0.0886415	2	1080.46	0.0306671	48.7427	0	C1203	25.71	A6802	9.4	A6802	0.07
High	STFEDVTQV	5	1	1	Q14247		0	2.08358e+07	0.002	0.008009	32.64	0.180067	2	1025.48	-0.175671	61.9147	0	C1203	77.78	A6802	14.1	A6802	0.12
High	AAATSVHVV	10	1	1	Q68EM7		0	1.11885e+07	0.002	0.00823	32.19	0.180701	2	854.473	-0.156015	33.0512	0	C1203	88.89	C1203	118.5	C1203	0.6
High	EVSNIVKEAI	8	1	1	P63172		0	2.21779e+07	0.002	0.008025	31.92	0.227769	2	1101.62	-0.0303798	56.0377	0	C1203	11.43	A6802	49.7	A6802	0.5
High	AATPAVRTV	14	2	2	P11940;Q9H361		0	1.45541e+08	0.002	0.007915	31.78	0.21638	2	885.515	-0.0518877	31.7518	0	C1203	96.3	C1203	70.3	C1203	0.4
High	NKADVILKY	1	2	2	P47813;O14602		0	8.66763e+06	0.002	0.00707	31.69	0.140916	2	1063.61	-1.25276	41.2311	0	C1203	51.85	B1503	161.2	B1503	2.5
High	GKSTSIQSF	16	1	1	P13797		0	1.62976e+07	0.002	0.007932	31.51	0.225704	2	954.489	-0.318673	34.4809	0	C1203	37.04	B1503	11.3	B1503	0.25
High	GQFASDVQF	5	1	1	Q02833		0	1.18769e+07	0.002	0.007915	31.44	0.203674	2	998.458	0.468975	67.0223	0	C1203	37.04	B1503	3.7	B1503	0.03
High	RKIKVSNTL	14	1	1	P36543		0	1.40146e+07	0.002	0.007915	31.42	0.0412834	2	1058.67	-0.887383	23.9108	0	C1203	40.74	B1503	25.3	B1503	0.7
High	LILPGYIDF	4	1	1	P12268		0	5.26279e+06	0.002	0.007499	31.34	0.180874	2	1050.59	-0.782478	100.917	0	C1203	40.74	B1503	74.7	B1503	1.5
High	STFGYVHGV	15	1	1	P38606		0	2.48868e+07	0.002	0.008071	31.06	0.279724	2	966.468	-0.355283	50.0621	0	C1203	77.78	A6802	2.4	A6802	0.01
High	KAFARPWSL	5	1	1	Q8NAF0		0	1.4339e+07	0.002	0.007915	31.02	0.229811	2	1075.6	-0.338028	50.0678	0	C1203	81.48	C1203	29	C1203	0.12
High	LTVPFARYL	5	2	2	P12081;P49590		0	8.96657e+06	0.002	0.007915	30.85	0.147469	2	1079.62	-0.251923	80.5315	0	C1203	77.78	C1203	30.7	C1203	0.15
High	ELFPIQMEGV	7	1	1	O96008		0	5.63311e+06	0.002	0.007915	30.63	0.384911	2	1162.58	-0.310588	92.1558	0	C1203	34.29	A6802	20.6	A6802	0.2
High	GQLPGLHEY	7	1	1	Q8TAT6		0	3.83375e+07	0.002	0.007915	30.49	0.330702	2	1013.5	-0.770831	50.0338	0	C1203	48.15	B1503	6.7	B1503	0.12
High	GKSSLIVSY	3	1	1	Q96L33		0	1.76285e+07	0.002	0.007974	30.39	0.179669	2	953.53	-0.438943	47.1502	0	C1203	51.85	B1503	12.6	B1503	0.3
High	ETIPGPDAKV	4	1	1	Q8TDP1		0	7.43079e+07	0.002	0.007411	30.28	0.243766	2	1026.55	-0.934595	43.8398	0	C1203	48.57	A6802	14.5	A6802	0.12
High	DVYSGTPTKV	8	1	1	Q14493		0	2.60514e+07	0.002	0.007915	30.28	0.333585	2	1066.54	-0.800989	42.1332	0	C1203	40	A6802	108.4	A6802	0.8
High	TAFPKPLLT	7	1	1	Q9BZG8		0	2.03897e+07	0.002	0.007915	30.22	0.294307	2	987.587	-0.620446	58.1774	0	C1203	55.56	C1203	345.5	C1203	1.3
High	LKSGGVNQY	8	1	1	Q15021		0	9.35736e+06	0.002	0.007915	30.14	0.411082	2	965.505	-0.556289	27.1223	0	C1203	48.15	B1503	22.1	B1503	0.6
High	EVFFDGVRV	5	1	1	P49748		0	1.15818e+07	0.002	0.007885	29.91	0.399136	2	1067.55	-0.372777	70.0655	0	C1203	44.44	A6802	8.9	A6802	0.06
High	LQRATGISF	5	1	1	Q15393		0	7.23987e+06	0.002	0.007917	29.81	0.320572	2	992.552	-0.292894	48.5465	0	C1203	33.33	B1503	2.2	B1503	0.01
High	HAAGVLLHV	5	1	1	Q6UX98		0	1.23665e+07	0.002	0.007915	29.52	0.314509	2	916.535	-0.985571	40.5781	0	C1203	85.19	A6802	6.7	A6802	0.04
High	NQKEAVAY	3	1	1	Q03518		0	3.9649e+06	0.002	0.008399	29.5	0.513828	2	922.463	-0.0923035	26.3643	0	C1203	33.33	B1503	278.4	B1503	3.5
High	RQIDQFLVV	6	2	2	O94776;Q9BTC8		0	5.03629e+07	0.002	0.007915	29.33	0.328515	2	1117.64	-0.609782	68.672	0	C1203	48.15	B1503	8.7	B1503	0.17
High	YTIGKEIIDLV	2	3	3	Q71U36;P68363;Q9BQE3		0	5.25889e+06	0.002	0.008282	28.94	0.240545	2	1263.72	-0.0976084	81.1991	0		0	A6802	38.4	A6802	0.4
High	SVFGQVERA	3	1	1	Q15233		0	6.23745e+06	0.002	0.007915	28.72	0.555368	2	992.515	-0.781799	43.7503	0	C1203	11.11	A6802	160.3	A6802	1.1
High	AAFEGTVFF	11	1	1	Q8NB49		0	1.1167e+07	0.002	0.007979	28.53	0.527107	2	988.477	-0.47948	89.0977	0	C1203	81.48	B1503	6.1	C1203	0.05
High	NIPSFIVRL	10	1	1	P46781		0	1.54977e+07	0.002	0.007311	28	0.297801	2	1058.64	-0.300127	78.2388	0	C1203	48.15	A6802	74.4	A6802	0.6
High	KAFPKAYLL	2	1	1	Q66K89		0	3.89816e+07	0.002	0.007915	27.58	0.159044	2	1050.63	0.0188966	50.7782	0	C1203	85.19	C1203	33.7	C1203	0.15
High	NSYPHQLYT	4	1	1	Q8IZD2		0	7.74838e+06	0.002	0.007915	27.28	0.570839	2	1122.52	-0.906851	41.3111	0	C1203	44.44	C1203	340.4	C1203	1.3
High	AKFGNKEEY	2	1	1	Q9UJF2		0	2.80839e+06	0.002	0.007986	26.71	0.747526	2	1085.52	-1.86433	24.5236	0	C1203	51.85	B1503	31.5	B1503	0.8
High	FIIDDKGIL	3	2	2	Q06830;Q13162		0	1.10692e+07	0.002	0.008188	26.58	0.535179	2	1033.59	-0.0583051	74.4275	0	C1203	44.44	C1203	220.6	C1203	0.9
High	KAFDYPSLF	3	1	1	Q7L945		0	7.13457e+06	0.002	0.007906	26.53	0.891214	2	1087.55	-0.0803038	74.7417	0	C1203	77.78	B1503	4.3	C1203	0.01
High	GKVRTDITY	10	1	1	P62701		0	1.28377e+08	0.002	0.008006	26.34	0.667555	2	1052.57	-0.56787	31.3847	0	C1203	44.44	B1503	27.2	B1503	0.7
High	RQKELESNY	3	1	1	Q13438		0	2.2809e+06	0.002	0.008036	25.7	0.986717	2	1166.58	-0.154054	24.213	0	C1203	40.74	B1503	6.4	B1503	0.09
High	FAYDGKDYI	21	11	11	P30462;P18463;Q95365;P30475;Q29836;Q31612;P30504;Q9TNN7;P30505;Q95604;Q29865		0	3.80849e+07	0.002	0.007915	25.18	0.950366	2	1091.5	-0.101915	61.2575	0	C1203	77.78	C1203	5.5	C1203	0.01
High	KKKSPASTF	4	1	1	Q86U70		0	2.22941e+06	0.002	0.008028	25.1	0.62563	2	993.572	-0.368374	17.8082	0	C1203	37.04	B1503	7.4	B1503	0.12
High	MRYVASYLL	7	1	1	P05387		0	1.06128e+07	0.002	0.007966	24.98	1.4118	2	1115.59	0.139158	67.9533	0	C1203	40.74	B1503	28.5	C1203	0.4
High	FAFPGSTNSL	8	1	1	P16144		0	1.70279e+07	0.002	0.008202	24.68	1.36487	2	1040.5	-0.0913301	76.4573	0	C1203	82.86	C1203	15.8	C1203	0.05
High	GKKLFGEGY	2	1	1	Q92624		0	8.67864e+06	0.002	0.007915	24.63	1.2431	2	998.53	-0.280676	36.6973	0	C1203	37.04	B1503	308.1	B1503	4
High	THLKPGTLY	15	1	1	Q53EP0		0	4.1071e+07	0.002	0.007915	23.98	1.71916	2	1029.57	-0.573196	34.5433	0	C1203	37.04	B1503	35.2	B1503	0.9
High	HKRIHGVGF	5	1	1	P62899		0	4.04706e+06	0.002	0.007915	23.98	0.968066	2	1050.59	-0.787305	25.3353	0	C1203	33.33	B1503	23.9	B1503	0.6
High	TVFDEAIRA	3	3	3	P63000;P15153;P60763		0	8.80785e+06	0.002	0.008254	23.64	2.05985	2	1021.53	0.136466	56.2858	0	C1203	11.11	A6802	144.3	A6802	1
High	QQALHTVQY	1	1	1	Q5SRE5		0	7.40279e+06	0.002	0.007915	23.34	1.86978	2	1087.55	-0.293619	38.3022	0	C1203	44.44	B1503	4.4	B1503	0.04
High	PQYQTWEEF	4	1	1	P49458		0	2.12025e+07	0.002	0.007915	23.21	0.807263	2	1227.53	-0.138131	75.3597	0	C1203	37.04	B1503	75.2	B1503	1.5
High	KGFAFVQY	4	2	2	O60812;P07910		0	1.4548e+07	0.002	0.007915	22.97	2.13724	2	959.498	-0.80459	61.5083	0	C1203	33.33	B1503	332.5	B1503	4
High	RTTDIVIRI	4	1	1	Q9C0C9		0	4.09095e+07	0.002	0.007915	22.89	0.710922	2	1086.66	-0.68306	51.1207	0	C1203	70.37	A6802	375.8	C1203	1.4
High	KGYPSEFATY	1	1	1	P48730		0	7.79402e+06	0.002	0.007609	22.81	1.64725	2	1162.54	0.00877818	51.6918	0	C1203	34.29	B1503	28.3	B1503	0.7
High	FGVDRAILY	3	1	1	P06756		0	22436361	0.002	0.007915	22.61	1.76381	2	1053.57	-0.463258	64.8814	0	C1203	48.15	C1203	20.6	C1203	0.08
High	EVIWLTQHV	1	1	1	Q9UJW0		0	6.52605e+06	0.002	0.007915	21.73	2.09687	2	1124.61	0.108171	69.2488	0	C1203	37.04	A6802	3.6	A6802	0.01
High	RANPFNTPH	3	1	1	Q00325		0	6.31133e+06	0.002	0.007915	21.33	2.46887	2	1053.52	-0.678852	29.6198	0	C1203	44.44	B1503	127.1	B1503	2.5
High	VQIPPSTTY	13	1	1	Q12906		0	0	0.002	0.007915	21.03	4.24091	2	1005.53	-0.0280968	57.8667	0	C1203	51.85	B1503	2.3	B1503	0.01
High	NQKPPSAEY	17	1	1	Q9UPN3		0	1.99944e+07	0.002	0.007196	20.88	3.49048	2	1033.49	-0.246537	29.0963	0	C1203	48.15	B1503	10.1	B1503	0.2
High	AKLPSETIF	3	1	1	P57678		0	2.54257e+07	0.002	0.007915	20.29	3.28281	2	1005.56	-1.5177	58.452	0	C1203	40.74	B1503	12.6	B1503	0.3
High	YVTTSTRTY	6	1	1	P08670		0	3.37336e+07	0.002	0.007915	19.81	5.46127	2	1091.54	-0.65317	32.7788	0	C1203	48.15	B1503	34.5	C1203	0.17
High	RTFPWIIEV	5	1	1	P28749		0	1.8069e+07	0.002	0.008287	19.63	3.25808	2	1160.65	-0.440917	85.8403	0	C1203	88.89	C1203	16.2	C1203	0.06
High	RGFGFVTY	7	3	3	Q32P51;P09651;P51991		0	4.09115e+07	0.002	0.007915	19.57	3.34039	2	946.478	-0.155728	63.02	0	C1203	33.33	B1503	71.3	B1503	1.5
High	SKLTQILSY	1	1	1	Q13123		0	3.25608e+06	0.002	0.007915	19.42	2.01032	2	1052.6	0.0181563	63.0246	0	C1203	44.44	B1503	11	B1503	0.25
High	DTTKWEWLV	4	1	1	Q9BWJ5		0	1.1465e+07	0.002	0.007915	17.2	8.4269	2	1177.59	-0.15341	84.2468	0	C1203	66.67	A6802	76.2	A6802	0.7
High	RKPEGGPSF	4	1	1	P59923		0	2.68573e+06	0.002	0.007915	16.97	9.08713	2	974.505	-0.29425	25.4512	0	C1203	33.33	B1503	49.4	B1503	1.1
High	RQEGVPRTF	14	1	1	Q00403		0	123127290	0.002	0.007928	16.64	9.36015	2	1089.58	-1.02451	32.8017	0	C1203	44.44	B1503	9.5	B1503	0.2
High	QERPSVTSY	6	1	1	Q9UJX3		0	16595329	0.002	0.008108	16.6	7.63529	2	1066.52	-0.216049	34.7845	0	C1203	48.15	B1503	17	B1503	0.5
High	FKTWFQEY	1	1	1	Q8N1F7		0	4.12352e+06	0.002	0.007915	15.97	9.40646	2	1148.54	-0.501817	69.5224	0	C1203	43.33	B1503	348.1	B1503	4
High	KKIPSTVEF	3	1	1	Q9H2G9		0	2.06273e+07	0.002	0.008033	15.53	6.90789	2	1048.6	-0.547669	38.7553	0	C1203	44.44	B1503	4.6	B1503	0.04
High	EVIEKFDYV	1	1	1	Q92871		0	1.13686e+07	0.002	0.007915	10.47	28.4485	2	1141.58	-0.0429693	61.7172	0	C1203	40.74	A6802	2.9	A6802	0.01
High	SIHVGQAGV	4	5	5	Q71U36;P68363;Q9BQE3;Q13748;Q6PEY2		0	1.88198e+07	0.003	0.009814	54.25	0.0013532	2	867.468	-0.166061	36.4876	0	C1203	37.04	A6802	335	A6802	1.7
High	TVVEIILQA	4	1	1	P38935		0	8.00732e+06	0.003	0.009814	46.51	0.0040651	2	985.592	-0.546418	85.9808	0	C1203	11.11	A6802	40.2	A6802	0.4
High	AQRPTEQEL	13	1	1	Q9ULW3		0	1.35919e+07	0.003	0.009814	45.96	0.00869169	2	1071.54	-0.518228	30.6512	0	C1203	51.85	B1503	62.6	B1503	1.4
High	AASSIQRVL	6	2	2	Q5BKT4;Q5I7T1		0	2.27659e+07	0.003	0.009114	44.2	0.00993435	2	944.551	-1.34167	41.4202	0	C1203	92.59	C1203	411.2	C1203	1.5
High	SVTQIYHAV	13	1	1	P04844		0	2.0285e+07	0.003	0.00862	44.08	0.0201654	2	1017.54	-0.987038	45.8892	0	C1203	37.04	A6802	11.8	A6802	0.1
High	GQVQVRTLY	3	1	1	Q8N8N7		0	4.71348e+06	0.003	0.009814	41.95	0.0202425	2	1063.59	0.251957	45.7305	0	C1203	37.04	B1503	8.1	B1503	0.15
High	KAIDVVVMV	7	1	1	Q8TDR0		0	3.83045e+07	0.003	0.009814	40.49	0.0225515	2	973.575	-0.386894	63.7921	0	C1203	85.19	C1203	46.5	C1203	0.25
High	STADFQVGV	1	1	1	Q9BYK8		0	1.91847e+07	0.003	0.009814	40.19	0.0433035	2	923.447	-0.379554	61.7469	0	C1203	77.78	A6802	2.7	A6802	0.01
High	RQALLLLAL	4	1	1	Q7Z7H5		0	1.68731e+07	0.003	0.009814	39.73	0.00240496	2	1010.67	-0.146107	81.5479	0	C1203	44.44	B1503	8.1	B1503	0.15
High	DVATITKTV	7	1	1	P57740		0	8.07786e+06	0.003	0.009814	39.59	0.0200843	2	947.541	-0.206136	46.3315	0	C1203	48.15	A6802	20.2	A6802	0.2
High	DVIGQTITI	3	1	1	Q6UN15		0	4.21973e+06	0.003	0.009814	39	0.0422244	2	959.541	-0.267167	79.9448	0	C1203	40.74	A6802	70.8	A6802	0.6
High	YGFPSPIFL	1	1	1	Q76EJ3		0	1.19493e+07	0.003	0.008615	38.45	0.0488253	2	1040.54	-1.49403	101.268	0	C1203	59.26	C1203	13.8	C1203	0.04
High	EAASILQEL	3	1	1	O00232		0	1.2129e+07	0.003	0.008664	37.76	0.0769887	2	973.52	0.0275959	80.2409	0	C1203	85.19	A6802	27	A6802	0.25
High	ELINIIDGV	18	1	1	Q8NI22		0	1.76632e+07	0.003	0.009814	37.5	0.0448749	2	985.556	-0.357557	89.9185	0	C1203	40.74	A6802	11.1	A6802	0.09
High	RAYPAAITI	9	1	1	O95071		0	7.08545e+07	0.003	0.009814	37.03	0.059743	2	975.562	-0.301419	54.5419	0	C1203	85.19	C1203	9.5	C1203	0.02
High	EVINTVAQV	4	1	1	O15121		0	2.68059e+07	0.003	0.009814	36.96	0.0868821	2	972.536	0.164669	58.3784	0	C1203	40.74	A6802	6.3	A6802	0.03
High	ALNPQNTVF	3	1	1	P08107		0	1.80659e+07	0.003	0.009814	36.81	0.10806	2	1003.52	-0.265987	62.4342	0	C1203	44.44	B1503	13.8	B1503	0.4
High	YQTAPKAGY	4	1	1	Q96KR1		0	5.30513e+06	0.003	0.008461	36.55	0.0854808	2	998.494	-0.369844	32.025	0	C1203	40.74	B1503	6.6	B1503	0.1
High	NAYTGIVLL	4	1	1	Q969H6		0	2.63663e+07	0.003	0.009814	36.52	0.0641232	2	963.551	-0.168596	84.7766	0	C1203	85.19	C1203	38.2	C1203	0.17
High	GKSGVAITF	1	1	1	Q9BUQ8		0	7.49568e+06	0.003	0.009814	36.27	0.0649013	2	879.493	-0.734343	48.763	0	C1203	44.44	B1503	18.5	B1503	0.5
High	FLFDGSPTYV	3	1	1	P49327		0	2.41706e+07	0.003	0.009814	36.16	0.0792161	2	1145.55	0.0418142	89.8288	0	C1203	54.29	A6802	43.4	C1203	0.25
High	GKVTGDTVY	4	1	1	Q6UX04		0	1.6158e+07	0.003	0.009814	35.99	0.0941234	2	939.476	-2.88441	31.0111	0	C1203	40.74	B1503	16.6	B1503	0.4
High	HAIDRVTTSV	3	1	1	Q9BTT6		0	8.47335e+06	0.003	0.009814	35.92	0.0804547	2	1098.59	-0.0963149	33.5511	0	C1203	60	A6802	17.3	A6802	0.15
High	GKSTTTGHLIY	2	3	3	P68104;Q05639;Q5VTE0		0	6.13774e+06	0.003	0.009814	35.92	0.107563	2	1177.62	-0.146075	31.9899	0		0	B1503	498.7	B1503	5
High	DASEIQVQV	6	1	1	P18858		0	1.08354e+07	0.003	0.009814	35.63	0.111736	2	988.494	-0.489746	64.0159	0	C1203	85.19	A6802	33.3	A6802	0.4
High	EVAGIINDA	2	1	1	Q14008		0	5.08155e+07	0.003	0.008746	35.12	0.123152	2	901.463	-0.0891023	56.266	0	C1203	11.11	A6802	11.6	A6802	0.09
High	AAADVLEFV	5	1	1	P53618		0	4.96361e+06	0.003	0.009814	34.96	0.164875	2	934.488	-0.192295	86.2611	0	C1203	85.19	A6802	15.8	A6802	0.15
High	TKQPIPAAY	5	1	1	Q6P1J9		0	8452624	0.003	0.009814	34.77	0.182418	2	988.546	-0.607397	39.7771	0	C1203	48.15	B1503	21.6	B1503	0.6
High	VTYNYPVHY	1	1	1	Q9NV96		0	26143371	0.003	0.009814	34.77	0.0925425	2	1155.55	-0.324446	53.4389	0	C1203	81.48	B1503	24.7	C1203	0.12
High	ETIIDTKGV	6	1	1	Q9GZS1		0	8.78036e+06	0.003	0.009666	34.44	0.125067	2	975.536	-0.12322	45.5816	0	C1203	70.37	A6802	10.4	A6802	0.08
High	AATEIVERV	15	1	1	Q9UID3		0	1.54194e+07	0.003	0.009814	34.41	0.160093	2	987.546	-0.811226	42.6815	0	C1203	85.19	A6802	351.2	A6802	1.8
High	NSSQVVVAV	15	1	1	Q16531		0	3.07991e+08	0.003	0.009571	34.3	0.199849	2	902.494	-0.566605	51.9552	0	C1203	77.78	A6802	13.7	A6802	0.12
High	GKLHPSSSL	8	1	1	A5PLN9		0	3.59715e+06	0.003	0.009814	33.61	0.129761	2	925.51	-0.474454	23.4475	0	C1203	37.04	B1503	84	B1503	1.7
High	KKIEDNNTL	8	1	1	P62750		0	8.9501e+07	0.003	0.009814	33.51	0.201102	2	1074.58	-0.666895	23.0611	0	C1203	44.44	B1503	104.6	B1503	1.9
High	RAYPDANLL	7	1	1	P24385		0	1.82799e+07	0.003	0.009814	33.12	0.21812	2	1032.55	-0.140004	53.3221	0	C1203	85.19	C1203	14.8	C1203	0.05
High	SSYGNIRAV	5	1	1	Q8N122		0	5.93645e+06	0.003	0.009814	32.95	0.161147	2	966.499	-1.19834	38.8322	0	C1203	81.48	C1203	7.2	C1203	0.01
High	SVITQVFHV	6	1	1	Q00341		0	39873773	0.003	0.009814	32.47	0.244191	2	1029.57	0.484168	71.6702	0	C1203	40.74	A6802	10.4	A6802	0.08
High	NAFHHPSAV	5	1	1	P32314		0	6.58794e+06	0.003	0.009074	32.25	0.315314	2	979.474	-0.62052	26.7872	0	C1203	81.48	C1203	16.1	C1203	0.06
High	RALALVVTL	7	1	1	O00622		0	9.7558e+07	0.003	0.009814	32.11	0.0353112	2	955.63	-0.448013	70.0647	0	C1203	85.19	B1503	40.2	C1203	0.6
High	RKYHQRPTF	6	1	1	O75369		0	4.6415e+06	0.003	0.009814	31.98	0.244991	3	1232.66	-0.316799	21.2262	0	C1203	37.04	B1503	5.6	B1503	0.07
High	FTAAIISRV	6	1	1	Q9Y570		0	46765697	0.003	0.008934	31.56	0.12233	2	977.577	-0.46147	58.2242	0	C1203	77.78	A6802	2.5	A6802	0.01
High	IASAIVNEL	2	1	1	Q9NR09		0	2.30436e+07	0.003	0.009165	31.48	0.259628	2	929.529	-1.12842	68.8273	0	C1203	85.19	C1203	33.4	C1203	0.15
High	KKVERQTEL	3	2	2	P11940;Q9H361		0	6.77448e+06	0.003	0.009814	31.27	0.199003	2	1130.65	-0.298837	18.325	0	C1203	44.44	B1503	209.3	B1503	3
High	EVMSVIAQV	5	1	1	Q96QP1		0	1.84711e+07	0.003	0.009814	31.21	0.344359	2	975.518	-0.510136	73.1556	0	C1203	44.44	A6802	3	A6802	0.01
High	TAVTVNQSL	14	1	1	P05787		0	7.1616e+07	0.003	0.009814	31.15	0.330464	2	932.504	-0.352996	49.1985	0	C1203	74.07	C1203	436.7	C1203	1.5
High	ETIRNYAQV	8	1	1	Q9Y6E2		0	2.83666e+07	0.003	0.009814	31.06	0.324497	2	1093.56	-0.701825	43.1763	0	C1203	66.67	A6802	5	A6802	0.02
High	RTYPVEILY	3	1	1	Q14562		0	3.28515e+07	0.003	0.009814	30.79	0.258858	2	1153.62	-0.56516	65.2644	0	C1203	81.48	B1503	32.9	C1203	0.25
High	GQVQKIVLY	2	1	1	Q00610		0	2.34031e+07	0.003	0.009814	30.26	0.155553	2	1047.62	-0.877502	52.6263	0	C1203	44.44	B1503	10.4	B1503	0.25
High	HVGDIIKEV	13	2	2	Q14168;Q9NZW5		0	3.74647e+07	0.003	0.009814	30.22	0.223107	2	1009.57	-0.650873	45.3971	0	C1203	51.85	A6802	232.4	A6802	1.4
High	KALSRLISF	8	1	1	Q8N8L2		0	4.94268e+07	0.003	0.009518	30.03	0.0742851	2	1034.63	-1.25096	58.75	0	C1203	74.07	B1503	8.8	B1503	0.17
High	TNSSVIVRV	4	1	1	Q8NI29		0	1.3754e+07	0.003	0.008859	29.94	0.273553	2	974.562	-0.862898	41.8036	0	C1203	51.85	A6802	307.6	A6802	1.6
High	KKNKGGVAV	1	1	1	P11388		0	312081	0.003	0.009814	29.12	0.233596	2	900.563	-0.0374224	16.4933	0	C1203	40.74	B1503	122.7	B1503	2.5
High	ETISPSGQGV	9	1	1	P23610		0	2.18068e+07	0.003	0.009814	28.46	0.528045	2	974.478	-1.03484	42.9766	0	C1203	51.43	A6802	6.4	A6802	0.04
High	SQVPRSSSM	1	1	1	Q9H992		0	5.44209e+06	0.003	0.009394	27.97	0.642501	2	978.467	-0.51798	25.6185	0	C1203	37.04	B1503	3.5	B1503	0.02
High	HAFWGGSVV	9	1	1	O75179		0	1.35614e+08	0.003	0.009814	27.8	0.317645	2	959.473	-0.429689	59.6037	0	C1203	81.48	C1203	6.6	C1203	0.01
High	HQMTPSSSY	7	1	1	Q93074		0	7.1566e+06	0.003	0.009814	27.75	0.254339	2	1037.43	-0.68166	30.3744	0	C1203	37.04	B1503	2.1	B1503	0.01
High	VQRQGVSY	4	1	1	Q8IVT2		0	4.67392e+06	0.003	0.009814	27.72	0.593091	2	936.489	-0.964384	27.313	0	C1203	30	B1503	20.4	B1503	0.5
High	SAFPAVQYL	6	1	1	Q13227		0	8.76899e+06	0.003	0.009814	27.15	0.914803	2	995.52	-0.0516475	81.9347	0	C1203	88.89	C1203	6.3	C1203	0.01
High	HTVGFILQL	5	1	1	Q5SRE5		0	6.3827e+07	0.003	0.009814	26.85	0.517688	2	1027.59	-0.216022	77.6464	0	C1203	77.78	A6802	18.5	A6802	0.17
High	KKAQAQPVM	4	1	1	P24539		0	2.03048e+06	0.003	0.009814	26.81	0.488813	2	1000.56	-0.276671	19.7686	0	C1203	37.04	B1503	16.5	B1503	0.4
High	SQFHGLITHY	2	1	1	Q92845		0	7.27204e+06	0.003	0.009814	26.76	1.07266	3	1202.6	-0.068869	47.1016	0	C1203	42.86	B1503	5.2	B1503	0.06
High	EVYEKPVQV	14	1	1	Q9Y508		0	7.80449e+07	0.003	0.009814	26	1.23032	2	1090.58	-0.683366	42.3753	0	C1203	51.85	A6802	15.2	A6802	0.15
High	LQRATPEQY	1	1	1	P14324		0	9.45219e+06	0.003	0.008798	26	1.08802	2	1105.56	-0.694208	32.5328	0	C1203	40.74	B1503	6.9	B1503	0.12
High	SVKWPNSVM	1	1	1	Q6PJG2		0	1.53878e+07	0.003	0.009814	25.81	1.3083	2	1047.53	-0.47462	56.3246	0	C1203	33.33	C1203	231	C1203	1
High	SQLPKLLVY	1	1	1	P11117		0	8.98925e+06	0.003	0.009814	25.64	0.40307	2	1060.64	-0.419807	68.3424	0	C1203	51.85	B1503	3.3	B1503	0.02
High	MQYPGRSLVF	5	1	1	Q9GZR7		0	9.39019e+06	0.003	0.008711	25.32	0.926975	2	1197.61	-0.589187	65.0175	0	C1203	48.57	B1503	1.8	B1503	0.01
High	TVFNFPVSI	1	1	1	P28562		0	1.11603e+07	0.003	0.009814	24.95	1.2746	2	1023.55	-0.64553	95.6319	0	C1203	40.74	C1203	13.1	C1203	0.04
High	TKWPGDILAY	2	1	1	Q9UG63		0	9.9685e+06	0.003	0.009814	24.62	1.54417	2	1163.61	-0.3462	73.92	0	C1203	40	B1503	26.7	B1503	0.7
High	IKFFTGDVF	3	1	1	Q9UBE0		0	1.04634e+07	0.003	0.008641	24.37	1.48779	2	1073.57	-0.534352	78.4574	0	C1203	37.04	B1503	4.4	B1503	0.04
High	KKVETNMAF	4	1	1	P05155		0	7.48347e+06	0.003	0.009814	24.21	1.32134	2	1067.55	-0.67088	32.4728	0	C1203	33.33	B1503	3.4	B1503	0.02
High	GKTTQVTQF	6	1	1	Q9H2U1		0	6.48776e+06	0.003	0.009814	23.5	1.46669	2	1009.53	-0.748985	33.9173	0	C1203	33.33	B1503	81.1	B1503	1.6
High	EVSPVSRQSI	9	1	1	Q9H6S3		0	2.50877e+07	0.003	0.009531	23.13	2.03756	2	1101.59	0.0927015	39.5055	0	C1203	20	A6802	63.6	A6802	0.6
High	RKVLVKVDEY	1	1	1	Q9BXC9		0	6.92882e+06	0.003	0.008605	22.76	0.82548	3	1248.73	-0.430327	33.34	0	C1203	28.57	B1503	218.8	B1503	3
High	PQRATSNVF	7	3	3	P19105;O14950;P24844		0	1.91269e+07	0.003	0.009814	22.69	2.4093	2	1019.53	-0.846202	33.0455	0	C1203	33.33	B1503	22.2	B1503	0.6
High	KKFKGDLAY	2	2	2	Q96K31;Q96EF9		0	7.4699e+06	0.003	0.009267	22.64	1.48867	2	1069.6	-0.503061	26.8039	0	C1203	44.44	B1503	3.4	B1503	0.02
High	EVIGGTNHTL	1	1	1	Q9P2E3		0	8.19892e+06	0.003	0.009559	22.55	1.62268	2	1040.54	-1.86198	39.2193	0	C1203	40	A6802	51.4	A6802	0.5
High	VKFPSIMVY	1	1	1	Q68CR1		0	3.88735e+06	0.003	0.009814	21.82	1.83191	2	1083.59	0.098387	74.3136	0	C1203	59.26	B1503	3.1	B1503	0.01
High	QKVLPVGVLY	2	1	1	Q03393		0	5.49473e+06	0.003	0.009814	21.47	0.963064	2	1115.68	0.0621553	65.8251	0	C1203	37.14	B1503	103.9	B1503	1.9
High	HKIEAGNEF	10	1	1	O43293		0	2.23024e+07	0.003	0.009814	21.16	2.66925	2	1044.51	-0.252352	29.0335	0	C1203	37.04	B1503	13.9	B1503	0.4
High	KKANITFEY	12	1	1	O15372		0	3.48923e+07	0.003	0.009814	20.98	2.91867	2	1113.59	-1.4265	39.6703	0	C1203	44.44	B1503	16.7	B1503	0.4
High	LKKDDSVGY	5	1	1	Q8N766		0	3.68311e+06	0.003	0.009814	20.93	2.33129	2	1024.53	-0.654216	25.6639	0	C1203	44.44	B1503	67.8	B1503	1.4
High	SKSGGDYAY	5	3	3	Q9GIP4;Q8MH63;Q01650		0	7.91129e+06	0.003	0.009814	20.82	1.81154	2	947.41	-0.335073	26.8448	0	C1203	44.44	B1503	26	B1503	0.7
High	HTIYPKDSV	4	1	1	Q9NZP8		0	7.05351e+06	0.003	0.009814	20.82	4.33552	2	1059.55	-0.497366	30.1878	0	C1203	66.67	A6802	9.3	A6802	0.07
High	DTSSLFDKL	4	1	1	Q16665		0	5.39234e+06	0.003	0.009814	20.8	2.72652	2	1025.51	-0.0693536	70.174	0	C1203	74.07	A6802	101.8	A6802	0.8
High	SKLGWIYEF	2	1	1	P62699		0	4.48628e+06	0.003	0.008903	20.46	3.23324	2	1142.59	-0.151477	80.0226	0	C1203	40.74	B1503	14.3	B1503	0.4
High	ALPEFTSIF	7	1	1	Q13887		0	6.76723e+06	0.003	0.009212	20.33	3.11183	2	1024.53	-0.298411	96.9142	0	C1203	37.04	B1503	41.9	B1503	1
High	GQDKPHETY	2	1	1	Q12789		0	1.49992e+06	0.003	0.009814	19.31	2.62161	2	1074.48	-0.281521	19.6817	0	C1203	40.74	B1503	85.5	B1503	1.7
High	RQSPHSNLF	3	1	1	O43929		0	2.91233e+06	0.003	0.009814	19.23	4.42014	2	1085.55	-0.401574	29.7588	0	C1203	40.74	B1503	2.1	B1503	0.01
High	FGIPFLLRI	2	1	1	Q93009		0	2.0885e+06	0.003	0.009814	19.21	0.69571	2	1075.67	-0.353406	97.4099	0	C1203	44.44	C1203	59.9	C1203	0.3
High	KKKEKDVQF	2	1	1	Q92544		0	804152	0.003	0.009814	18.96	2.27877	2	1149.66	0.172308	17.592	0	C1203	37.04	B1503	112.3	B1503	2
High	ELFTGFIKV	20	1	1	Q86TM6		0	5.0981e+07	0.003	0.009814	18.79	2.82889	2	1053.6	-0.591936	79.7502	0	C1203	44.44	A6802	54.3	A6802	0.5
High	PGGSGGSGGYGGRSRY	1	1	1	P22626		0	0	0.003	0.009814	18.53	4.04151	3	1471.67	0.179982	86.5192	0
High	ETQKSIYYI	4	1	1	P08238		0	1.95216e+08	0.003	0.009814	18.49	6.33355	2	1144.59	-0.794423	52.1669	0	C1203	62.96	A6802	12.3	A6802	0.1
High	EVFGLFQKL	6	1	1	P15924		0	2.57773e+07	0.003	0.009814	17.91	3.93113	2	1080.61	-0.158358	79.3352	0	C1203	44.44	A6802	30.7	A6802	0.3
High	RQIVSGLKY	1	1	1	Q9NYY3		0	4.75174e+06	0.003	0.009814	17.63	2.57926	2	1063.62	-1.59661	39.0755	0	C1203	40.74	B1503	3.6	B1503	0.03
High	FKSNVTKTM	2	1	1	Q9Y255		0	3.76661e+06	0.003	0.009404	17.09	6.59296	2	1055.55	-0.437742	26.8011	0	C1203	44.44	B1503	15.1	B1503	0.4
High	HQNSNIRTY	1	1	1	Q7RTS9		0	769530	0.003	0.009814	17.04	7.38695	2	1132.55	-0.472895	21.8183	0	C1203	51.85	B1503	3.6	B1503	0.03
High	RLLDTTITF	3	1	1	Q8N766		0	3.21079e+07	0.003	0.009814	16.91	4.5864	2	1079.61	-0.146999	71.3487	0	C1203	40.74	B1503	4.6	B1503	0.04
High	RKPCSVTSY	3	1	1	P37088		0	9.14692e+06	0.003	0.009814	16.56	6.6748	2	1040.52	-0.504434	25.128	0	C1203	40.74	B1503	14.4	B1503	0.4
High	RKYVNGSTY	10	1	1	Q6P2Q9		0	6.73098e+06	0.003	0.009435	16.36	9.27832	2	1087.55	-0.854835	24.4106	0	C1203	44.44	B1503	3.2	B1503	0.02
High	RKVYNISEF	14	1	1	O60427		0	1.91204e+07	0.003	0.009814	16.24	8.27497	2	1155.61	-0.697064	44.3815	0	C1203	37.04	B1503	4.8	B1503	0.05
High	ETFEKTPVEV	3	1	1	Q15149		0	7.80802e+06	0.003	0.009257	16.24	9.87458	2	1178.59	-0.37998	50.6193	0	C1203	57.14	A6802	7.4	A6802	0.05
High	NKWEVPSVY	6	1	1	Q75QN2		0	1.11268e+07	0.003	0.009814	15.18	13.5736	2	1121.56	-0.283392	61.6392	0	C1203	48.15	B1503	25.5	B1503	0.7
High	FKIEPPGLF	1	2	2	Q969P6;P11387		0	6.0893e+06	0.003	0.009814	14.28	12.5319	2	1047.59	-0.186618	77.1185	0	C1203	40.74	B1503	7.5	B1503	0.12
High	LQHPDVAAY	8	1	1	P35221		0	1.42262e+07	0.003	0.009814	14.2	14.0879	2	1013.5	-0.831053	43.4012	0	C1203	48.15	B1503	2.4	B1503	0.01
High	EQADIFERV	3	1	1	O60343		0	2.56753e+07	0.003	0.00854	13.68	18.8369	2	1106.55	-0.390847	56.6757	0	C1203	44.44	A6802	43.4	A6802	0.4
High	GKMNLYESF	3	1	1	Q68E01		0	1.06456e+07	0.003	0.009814	13.39	14.9767	2	1088.51	-0.267523	57.4479	0	C1203	29.63	B1503	11.1	B1503	0.25
High	GKKPEEKTY	1	1	1	Q9Y5B9		0	250125	0.003	0.009232	11.8	25.6217	2	1079.57	-0.58721	16.5816	0	C1203	51.85	B1503	297.3	B1503	4
High	FSETVITSV	2	1	1	Q9UBP4		0	1.09427e+08	0.004	0.009814	47.51	0.0042758	2	982.509	-0.485196	70.7836	0	C1203	74.07	C1203	65.1	C1203	0.3
High	AAFDKIQQL	6	1	1	Q9P2I0		0	2.47272e+07	0.004	0.01683	44.81	0.0130711	2	1033.57	-0.517653	55.5819	0	C1203	88.89	C1203	26.1	C1203	0.1
High	MAAMATARV	7	1	1	Q15904		0	4.00941e+06	0.004	0.009814	43.37	0.0205758	2	921.464	-0.282488	38.4688	0	C1203	77.78	A6802	4.2	A6802	0.01
High	EVSKIIKRA	1	1	1	O60502		0	1.84255e+06	0.004	0.01038	42.33	0.00569293	2	1043.66	-0.407624	22.5032	0	C1203	11.11	A6802	263.3	A6802	1.5
High	AQLLVLYY	1	1	1	Q9H0H0		0	6.3803e+07	0.004	0.01415	39.18	0.0234497	2	982.56	-0.779741	88.9345	0	C1203	30	B1503	124.9	B1503	2.5
High	EVYGSVAKV	4	1	1	Q07864		0	3.74337e+07	0.004	0.01158	38.79	0.0415283	2	951.514	-0.68069	40.3307	0	C1203	48.15	A6802	6.4	A6802	0.04
High	TTSHLHQAV	2	1	1	P22695		0	2.36902e+06	0.004	0.01468	38.35	0.0606365	2	993.511	-0.270161	19.9052	0	C1203	70.37	A6802	13.2	A6802	0.12
High	AKAQALVQY	2	1	1	Q9Y2Q5		0	7.31638e+06	0.004	0.009814	36.98	0.0631308	2	991.556	-1.13404	39.937	0	C1203	48.15	B1503	13.6	B1503	0.4
High	NSVFVATFL	6	1	1	O00767		0	5.35205e+06	0.004	0.00982	36.03	0.0902919	2	997.535	-0.209002	92.2128	0	C1203	66.67	A6802	17.4	A6802	0.17
High	YASNITSVL	6	2	2	Q13085;O00763		0	3.69351e+07	0.004	0.009814	34.42	0.0979421	2	967.509	-0.444955	68.9375	0	C1203	85.19	C1203	4.4	C1203	0.01
High	EIASITEQL	14	1	1	Q5UIP0		0	9.18689e+07	0.004	0.009814	33.74	0.143052	2	1003.53	-0.521528	68.8409	0	C1203	44.44	A6802	9	A6802	0.06
High	AKNNVVINY	2	1	1	Q6P2Q9		0	1.05738e+07	0.004	0.009858	33.62	0.181082	2	1034.56	-3.10404	40.844	0	C1203	48.15	B1503	25.3	B1503	0.7
High	HSAGYILGSVNV	1	1	1	Q13115		0	3.0549e+06	0.004	0.01327	32.9	0.219787	2	1216.63	-0.178989	62.3218	0		0	A6802	269.6	A6802	1.5
High	GKRIGVFSY	13	1	1	Q01581		0	4.86688e+07	0.004	0.009814	32.71	0.125885	2	1026.57	-0.67799	45.7055	0	C1203	40.74	B1503	23.4	B1503	0.6
High	STVEVIFHV	2	2	2	Q6GYQ0;Q2PPJ7		0	9.10869e+06	0.004	0.009814	32.48	0.315913	2	1030.56	-0.237878	68.6645	0	C1203	74.07	A6802	2.6	A6802	0.01
High	LKSPGSVVF	5	1	1	O75787		0	1.25782e+07	0.004	0.01392	32.25	0.173993	2	933.54	-0.576027	51.5976	0	C1203	48.15	B1503	4	B1503	0.03
High	RTAPSGSEY	1	1	1	O43660		0	1.43323e+06	0.004	0.01304	32.21	0.172868	2	967.448	0.255777	23.9362	0	C1203	81.48	B1503	29.9	C1203	0.4
High	ETFQNSVFV	5	1	1	O00767		0	4.65565e+07	0.004	0.01041	32.06	0.237159	2	1070.51	-0.374701	71.5252	0	C1203	74.07	A6802	3.4	A6802	0.01
High	RQPDSPTALY	7	1	1	Q9BQG0		0	3.44818e+07	0.004	0.01233	31.55	0.300547	2	1147.57	-0.625122	44.1289	0	C1203	34.29	B1503	14	B1503	0.4
High	TTVRVTNSNA	1	3	3	Q15155;Q5JPE7;P69849		0	1.99272e+06	0.004	0.009814	31.54	0.315024	2	1062.55	-0.202187	23.5746	0	C1203	20	A6802	85.9	A6802	0.7
High	SQQPASGVAY	1	1	1	Q96KR1		0	1.90192e+07	0.004	0.009814	30.96	0.307764	2	1007.48	-0.591582	40.6903	0	C1203	34.29	B1503	6.4	B1503	0.09
High	YAAPGGLIGV	5	2	2	Q2VIR3;P41091		0	2.41336e+07	0.004	0.009814	30.65	0.509106	2	917.509	-0.531596	72.3703	0	C1203	62.86	A6802	31.8	A6802	0.3
High	GQWGGGSHY	24	1	1	B1AH88		0	3.02559e+08	0.004	0.0123	30.64	0.101227	2	948.395	-0.53669	32.8133	0	C1203	40.74	B1503	5	B1503	0.05
High	GQRVISMY	4	1	1	Q92616		0	6.25514e+06	0.004	0.01486	30.6	0.23773	2	953.487	-0.831129	42.9247	0	C1203	36.67	B1503	107.6	B1503	2
High	LSKDGVLYV	7	1	1	Q9H1A4		0	4.37796e+07	0.004	0.009814	30.32	0.195315	2	993.561	-0.727369	53.2643	0	C1203	77.78	C1203	67.2	C1203	0.3
High	AAAPQLLIV	5	1	1	Q10589		0	9.20802e+07	0.004	0.01683	30.09	0.0642545	2	895.561	-0.382649	79.9987	0	C1203	92.59	C1203	97.7	C1203	0.5
High	EVIAEAVGV	2	1	1	O15226		0	9.99224e+06	0.004	0.009814	30.03	0.357224	2	886.488	-0.202707	63.8217	0	C1203	40.74	A6802	4.9	A6802	0.02
High	KQIEPSLY	2	1	1	Q9H6T3		0	8.46393e+06	0.004	0.01004	30.03	0.466566	2	977.529	-0.927672	44.736	0	C1203	30	B1503	10.5	B1503	0.25
High	PQCPSGRVY	2	1	1	Q16186		0	1.77136e+07	0.004	0.009814	29.71	0.336218	2	1006.48	-0.107051	35.4825	0	C1203	51.85	B1503	120	B1503	2.5
High	GQAHPSASY	2	1	1	Q15652		0	2.11653e+06	0.004	0.009814	29.3	0.274926	2	917.411	-0.477578	23.6556	0	C1203	40.74	B1503	3.4	B1503	0.02
High	EVLQILTQV	1	1	1	Q9Y6V7		0	6.76499e+06	0.004	0.01062	28.86	0.280577	2	1042.61	-0.493155	87.1867	0	C1203	37.04	A6802	16.5	A6802	0.15
High	DVAEVLWEI	7	1	1	Q9Y5L0		0	3.84362e+06	0.004	0.009814	28.84	0.532526	2	1073.55	-0.201425	105.089	0	C1203	40.74	A6802	6.8	A6802	0.04
High	SAIPHPLIM	15	1	1	P61201		0	5.74214e+07	0.004	0.01069	28.62	0.188519	2	978.543	-1.59645	60.8781	0	C1203	81.48	C1203	11.7	C1203	0.03
High	ETQNVVTKV	2	1	1	Q96MW1		0	1.36042e+07	0.004	0.009814	28.1	0.64121	2	1017.56	-0.118573	33.2781	0	C1203	70.37	A6802	22.4	A6802	0.25
High	HNAGISFSV	3	1	1	P40692		0	2.76972e+07	0.004	0.01587	27.72	0.63138	2	931.463	-0.78406	52.5004	0	C1203	44.44	A6802	23	A6802	0.25
High	TTFPRPVTV	22	1	1	Q15233		0	1.45065e+09	0.004	0.01683	27.63	0.676183	2	1017.57	-0.959497	52.6383	0	C1203	88.89	C1203	11.7	C1203	0.03
High	KLNGQVLVF	2	1	1	Q15459		0	1.32254e+07	0.004	0.009814	27.15	0.330089	2	1017.61	-0.672389	61.6722	0	C1203	44.44	B1503	12.1	B1503	0.3
High	DLPSFTQNV	2	1	1	Q96QU8		0	6.02157e+06	0.004	0.01683	27.15	1.07286	2	1020.5	-0.0695222	75.0472	0	C1203	40.74	A6802	133.3	A6802	1
High	THRSGQGAF	3	1	1	P36578		0	1.34389e+06	0.004	0.01571	27.03	0.838087	2	960.464	-0.375134	18.4565	0	C1203	33.33	B1503	73.8	B1503	1.5
High	MTADSRSQV	13	1	1	P60900		0	4.8831e+07	0.004	0.01679	26.9	0.682961	2	994.461	-0.863739	24.3888	0	C1203	74.07	A6802	3.8	A6802	0.01
High	EVYVGDERV	3	1	1	O14976		0	1.09969e+07	0.004	0.01523	26.39	0.968056	2	1065.52	-0.79776	43.2315	0	C1203	40.74	A6802	22.5	A6802	0.25
High	MSFGNVVEL	3	1	1	Q9UN86		0	6.99052e+06	0.004	0.009814	26.06	1.08127	2	995.486	-0.388364	84.3205	0	C1203	85.19	C1203	4.8	C1203	0.01
High	YTFSKYYF	1	1	1	Q9C030		0	1.07999e+07	0.004	0.01546	25.31	0.904379	2	1118.52	-0.206284	104.748	0	C1203	66.67	B1503	484	C1203	3
High	EIYSDTQFPS	7	1	1	Q9UKY7		0	2.91512e+07	0.004	0.009841	25	0.726533	2	1186.53	-0.204568	63.3046	0	C1203	5.71	A6802	406.8	A6802	1.9
High	LRNETNLAY	2	1	1	Q9P242		0	1.68783e+07	0.004	0.01006	24.76	1.37037	2	1093.56	-0.25532	44.7657	0	C1203	44.44	B1503	8	B1503	0.15
High	YVASNQHEV	1	1	1	Q13127		0	2.33138e+06	0.004	0.0134	24.42	1.11423	2	1046.49	-0.360832	26.2856	0	C1203	51.85	A6802	13.9	A6802	0.12
High	AAINFQPKM	1	1	1	Q96RK4		0	1.11199e+07	0.004	0.01128	23.91	1.62333	2	1019.53	-0.331675	53.4876	0	C1203	70.37	B1503	217.6	C1203	1.2
High	SAFPEVRSL	4	1	1	Q6YHU6		0	1.47032e+07	0.004	0.01305	23.89	1.76986	2	1005.54	1.33861	57.5787	0	C1203	92.59	C1203	16.9	C1203	0.06
High	RQGTPLIAF	4	1	1	Q2NL82		0	8.52512e+07	0.004	0.009814	23.64	1.28521	2	1002.57	-1.00859	60.473	0	C1203	33.33	B1503	3.8	B1503	0.03
High	RKSGVGNVF	5	2	2	Q13310;Q5JQF8		0	9.14796e+06	0.004	0.01332	23.49	1.16271	2	963.537	-0.375255	29.0931	0	C1203	40.74	B1503	6.8	B1503	0.12
High	KLLGPGVNY	5	1	1	P40763		0	6.63121e+06	0.004	0.01683	23.07	1.88565	2	960.551	-0.205377	50.4402	0	C1203	44.44	B1503	22.5	B1503	0.6
High	EAADIIQKL	10	1	1	O00471		0	46575842	0.004	0.009814	23.07	1.62797	2	1000.57	-0.753919	58.0754	0	C1203	85.19	A6802	44.8	A6802	0.4
High	ISFPAPLYI	1	1	1	P86397		0	8.83936e+06	0.004	0.009959	23.04	1.46296	2	1020.58	-0.316352	97.5247	0	C1203	77.78	C1203	8.2	C1203	0.01
High	SKHRAQVIY	4	1	1	P62851		0	1.6876e+06	0.004	0.009814	22.97	1.78373	2	1101.62	-0.44387	21.6666	0	C1203	40.74	B1503	15.9	B1503	0.4
High	YKVFREEKY	1	1	1	O43813		0	4.25366e+06	0.004	0.009814	22.93	2.44912	3	1261.66	-0.254098	32.894	0	C1203	40.74	B1503	102.6	B1503	1.9
High	SLFVSNHAY	5	1	1	P04075		0	1.34838e+07	0.004	0.009814	22.75	2.00834	2	1037.5	-0.155073	50.2679	0	C1203	40.74	B1503	7.2	B1503	0.12
High	FKIPSNTTL	1	1	1	Q8TEY7		0	0	0.004	0.01467	22.63	1.77153	2	1020.57	-0.444116	57.2473	0	C1203	51.85	B1503	19.6	B1503	0.5
High	FKVGDPEEY	7	1	1	Q8WYP3		0	2.11228e+07	0.004	0.009814	22.12	1.97171	2	1083.5	-0.155232	50.7668	0	C1203	51.85	B1503	131	B1503	2.5
High	EVFPEFAAA	1	1	1	O15294		0	8.97932e+06	0.004	0.009814	22.07	2.69395	2	980.472	-0.904788	77.6451	0	C1203	11.11	A6802	7.5	A6802	0.05
High	RQYGTISH	1	1	1	Q06481		0	1.71335e+06	0.004	0.01683	22.05	3.09871	2	961.485	-0.178323	21.8516	0	C1203	0	B1503	49.7	B1503	1.1
High	EAIGNPHHV	1	1	1	Q14146		0	4.18726e+06	0.004	0.009838	22	2.55727	2	973.485	-0.322065	22.5079	0	C1203	81.48	A6802	25.5	A6802	0.25
High	HTMDPQLRL	4	1	1	P49327		0	1.70694e+07	0.004	0.01625	22	1.78719	2	1110.57	-0.270263	45.0108	0	C1203	74.07	A6802	87.4	C1203	0.5
High	EIFDGNVAHI	3	1	1	P46939		0	1.74171e+07	0.004	0.009823	21.84	2.47551	2	1114.55	0.201708	63.6564	0	C1203	31.43	A6802	25.5	A6802	0.25
High	KKRLDGRQTY	1	1	1	Q06265		0	887513	0.004	0.01683	21.72	1.46944	3	1264.71	0.152294	18.1387	0	C1203	31.43	B1503	79.9	B1503	1.6
High	KKRDIYDKY	1	1	1	O75190		0	449599	0.004	0.0103	21.65	2.3612	3	1228.67	0.479965	20.9135	0	C1203	40.74	B1503	160	B1503	2.5
High	AQRYLLQY	5	1	1	P25789		0	2.15439e+07	0.004	0.009814	21.57	2.14944	2	1054.57	-0.328806	53.3703	0	C1203	26.67	B1503	45.9	B1503	1.1
High	RTTEINFKV	1	2	2	P29762;P29373		0	8.30929e+06	0.004	0.009814	21.56	1.98263	2	1107.61	-0.7363	43.1352	0	C1203	70.37	A6802	74.6	A6802	0.6
High	AKAYPPTSM	3	1	1	Q8NCW5		0	1.59862e+07	0.004	0.009814	21.35	3.58205	2	965.476	-0.125899	34.84	0	C1203	40.74	B1503	14	B1503	0.4
High	IGAARTKTY	3	1	1	Q9Y3B1		0	1.63061e+06	0.004	0.009814	20.81	2.10824	2	980.552	-0.473018	21.1727	0	C1203	48.15	B1503	91.2	C1203	0.9
High	RAIDSIHQL	1	1	1	Q8TEK3		0	3.01168e+06	0.004	0.009814	20.7	2.227	2	1052.58	-0.344975	38.6842	0	C1203	81.48	C1203	27.9	C1203	0.12
High	AKVLTPELY	2	1	1	P12277		0	2.21304e+07	0.004	0.009814	20.41	2.21791	2	1033.59	-0.393264	54.4898	0	C1203	44.44	B1503	48.8	B1503	1.1
High	GKRLDVTGF	6	1	1	Q9UIY3		0	9.59547e+06	0.004	0.01677	20.4	2.5322	2	992.551	-1.22537	39.7004	0	C1203	33.33	B1503	77.6	B1503	1.6
High	YIFEEPFTI	5	1	1	P08237		0	6.24655e+06	0.004	0.01003	20.28	3.01145	2	1158.57	-0.392413	97.8546	0	C1203	48.15	C1203	17.6	C1203	0.06
High	EQRSGDITY	1	1	1	P19174		0	6.56444e+06	0.004	0.009814	20.04	2.60787	2	1068.5	-0.35044	32.8356	0	C1203	48.15	B1503	11.8	B1503	0.25
High	KQQNPRLVY	7	1	1	O00764		0	1.59891e+07	0.004	0.01469	19.75	3.27998	2	1145.64	-0.511441	30.996	0	C1203	44.44	B1503	3.3	B1503	0.02
High	FSIYPAPQV	4	5	5	Q71U36;P68363;Q9BQE3;P68366;Q9H853		0	8.71049e+06	0.004	0.009814	19.61	5.67982	2	1021.53	-0.433296	78.3094	0	C1203	70.37	C1203	23.9	C1203	0.1
High	FTWEGLYNV	1	1	1	P51784		0	4.78752e+07	0.004	0.009853	18.99	3.85425	2	1128.54	-0.11965	91.2456	0	C1203	74.07	A6802	4	A6802	0.01
High	EVYPGQQYL	1	1	1	Q8NF64		0	2.04094e+07	0.004	0.009814	18.75	5.75081	2	1096.53	-0.481695	68.8464	0	C1203	48.15	A6802	21.3	A6802	0.2
High	VHAPPMQLGF	3	1	1	O95235		0	6.87068e+06	0.004	0.009814	18.73	4.3151	2	1096.56	-0.363771	64.4416	0	C1203	40	B1503	121.2	B1503	2.5
High	ETFWDKDQL	2	1	1	Q9UBG0		0	8.60219e+06	0.004	0.01044	18.48	4.49557	2	1181.55	-0.078279	63.6484	0	C1203	70.37	A6802	65	A6802	0.6
High	SALEHVVEF	3	1	1	O75581		0	3.91789e+07	0.004	0.01503	18.43	6.65636	2	1030.52	0.23889	61.4224	0	C1203	81.48	B1503	17	C1203	0.15
High	KQYKVVVY	7	1	1	P08754		0	1.72918e+07	0.004	0.01417	18.33	3.26028	2	1026.6	-0.661916	35.0249	0	C1203	30	B1503	6.9	B1503	0.12
High	RLVELLVSY	3	1	1	P51572		0	1.26008e+07	0.004	0.01069	18.21	2.20849	2	1091.65	-0.0363468	72.7022	0	C1203	44.44	B1503	7.9	B1503	0.15
High	EVSQVKETL	4	1	1	P30622		0	5.43419e+07	0.004	0.01149	18.01	5.87671	2	1032.56	-0.743027	36.8739	0	C1203	44.44	A6802	88.6	A6802	0.7
High	AAYGRSPMV	2	1	1	Q04726		0	7.13942e+06	0.004	0.01614	17.79	4.92204	2	951.471	-0.368087	37.0938	0	C1203	85.19	C1203	34.4	C1203	0.15
High	EVMKYITSL	5	1	1	P11586		0	1.12311e+07	0.004	0.009814	17.52	5.58912	2	1083.58	-0.125804	66.0936	0	C1203	40.74	A6802	16.6	A6802	0.15
High	ELINIIDGVL	1	1	1	Q8NI22		0	1.66371e+06	0.004	0.009814	17.34	3.21402	2	1098.64	-0.120915	103.855	0	C1203	34.29	A6802	491.6	A6802	2.5
High	RKYGNANVW	3	2	2	P67775;P62714		0	3.28035e+07	0.004	0.009814	17.22	8.78459	2	1107.57	-0.603227	33.0085	0	C1203	11.11	B1503	47.6	B1503	1.1
High	YKLPDNVTF	2	1	1	Q00796		0	6.00329e+06	0.004	0.009814	16.83	8.65965	2	1096.57	-0.168735	66.3485	0	C1203	48.15	B1503	11.2	B1503	0.25
High	RQFMDRTHY	1	1	1	P0C7U1		0	3527992	0.004	0.01144	16.4	7.92526	3	1253.58	0.12529	30.0416	0	C1203	40.74	B1503	2.7	B1503	0.01
High	KQISVGFIGY	1	1	1	Q13823		0	5.86823e+06	0.004	0.009814	15.63	7.59584	2	1111.61	-0.649596	64.8941	0	C1203	28.57	B1503	6.6	B1503	0.1
High	LQKPGETVF	2	1	1	Q6NYC1		0	9.56027e+06	0.004	0.01418	15.15	15.3388	2	1018.56	-0.669961	45.5512	0	C1203	40.74	B1503	3.4	B1503	0.02
High	YQYKGMGL	3	1	1	P28074		0	7.10903e+06	0.004	0.01027	15.11	13.0943	2	959.465	-0.104886	49.7783	0	C1203	40	B1503	44.2	B1503	1
High	RQIDLVDNYF	6	1	1	Q9UPN9		0	9.05421e+06	0.004	0.009814	14.79	13.7388	2	1282.64	-0.511388	72.0123	0	C1203	34.29	B1503	7.7	B1503	0.15
High	AKHESQQDY	2	1	1	Q14247		0	1.05346e+06	0.004	0.009814	13.94	8.32922	2	1105.49	-0.560228	16.9918	0	C1203	44.44	B1503	54.7	B1503	1.2
High	KKSKENVLY	1	1	1	P62191		0	1.39177e+06	0.004	0.014	13.79	7.64003	2	1108.64	-0.299029	20.8844	0	C1203	44.44	B1503	32.1	B1503	0.8
High	FVRDMIREV	2	1	1	Q9Y3U8		0	7.80455e+06	0.004	0.009844	13.33	12.8903	2	1164.62	-1.073	49.3156	0	C1203	55.56	C1203	19.5	C1203	0.07
High	EIYSFSESL	2	1	1	P13010		0	5.65734e+06	0.004	0.01683	13	12.6876	2	1074.5	-0.285226	77.6103	0	C1203	44.44	A6802	19	A6802	0.17
High	EAFHYIFNV	3	1	1	Q9UEY8		0	4.6031e+08	0.004	0.009814	12.99	15.3014	2	1139.55	-0.215777	76.2879	0	C1203	81.48	A6802	3.5	A6802	0.01
High	KKLQQTQEY	5	2	2	P42229;P51692		0	1.75504e+06	0.004	0.009814	12.57	18.2744	2	1165.62	-0.0428538	21.2984	0	C1203	40.74	B1503	22.7	B1503	0.6
High	ETFKNSFVEA	1	1	1	Q6NUM9		0	4.6005e+07	0.004	0.01369	11.44	24.2112	2	1171.56	0.00390931	50.7164	0	C1203	25.71	A6802	14.4	A6802	0.12
High	mTNDKTAKV	2	1	1	P46013	M1(Oxidation)	0	472672	0.004	0.01683	10.74	39.9193	2	1023.51	-0.250926	16.4301	0	C1203	70.37	A6802	7.4	A6802	0.05
High	YQHDDGRVSY	3	1	1	P60983		0	5.83184e+06	0.004	0.009814	10.3	17.2512	3	1239.54	-0.121288	28.7383	0	C1203	40	B1503	5.8	B1503	0.07
High	SVHVGQAGV	2	2	2	P68366;Q9NY65		0	1.23134e+07	0.005	0.01683	41.88	0.0265064	2	853.453	0.00353564	31.3348	0	C1203	37.04	A6802	95.3	A6802	0.8
High	MAGPLRAPL	2	1	1	P01034		0	9.99448e+06	0.005	0.01683	41.73	0.00761065	2	925.528	-0.522284	53.368	0	C1203	81.48	C1203	92.8	C1203	0.5
High	ETNLDSLPL	4	1	1	P08670		0	1.86801e+07	0.005	0.01683	40.08	0.0304047	2	1001.51	-0.619501	76.3576	0	C1203	70.37	A6802	78.9	A6802	0.7
High	GKAFGDSSY	2	1	1	Q9H5H4		0	3.81288e+06	0.005	0.01683	38.71	0.0316479	2	931.415	-0.246359	32.7205	0	C1203	40.74	B1503	12.2	B1503	0.3
High	KAVGHPFVI	2	1	1	O14980		0	5.06349e+07	0.005	0.01683	34.32	0.0509623	2	967.571	-1.36298	39.7269	0	C1203	77.78	C1203	67.5	C1203	0.3
High	DIATILSKV	2	1	1	Q8NG31		0	7.23138e+06	0.005	0.01683	33.45	0.0616557	2	959.577	-0.217147	79.0372	0	C1203	40.74	A6802	14.5	A6802	0.12
High	SVFGFSFKL	5	1	1	P26639		0	6.05713e+06	0.005	0.01683	32.46	0.235673	2	1031.56	-0.368025	86.3234	0	C1203	44.44	A6802	12.6	A6802	0.1
High	EASYLITSV	4	1	1	O60488		0	1.09427e+08	0.005	0.01683	32.16	0.146561	2	982.509	-0.475018	70.7087	0	C1203	81.48	A6802	7	A6802	0.04
High	SQYQGVVVY	6	1	1	Q9Y221		0	2.85834e+08	0.005	0.01683	32.01	0.231375	2	1042.52	-1.14018	60.6663	0	C1203	51.85	B1503	1.9	B1503	0.01
High	TLIDSLDTL	1	1	1	Q9BZQ6		0	9.78964e+06	0.005	0.01683	31.93	0.24148	2	990.535	-0.0861968	77.1477	0	C1203	44.44	C1203	188.4	C1203	0.8
High	GKIIKPLQY	2	1	1	Q13823		0	1.28748e+07	0.005	0.01683	31.72	0.0543765	2	1059.65	-1.34064	39.7192	0	C1203	44.44	B1503	92.9	B1503	1.8
High	MTTKLISEL	2	1	1	Q5UIP0		0	2.63437e+07	0.005	0.01683	30.57	0.241263	2	1035.57	-1.32006	60.0213	0	C1203	74.07	A6802	25.4	A6802	0.25
High	AKLPEIEEY	2	1	1	Q9BQ39		0	1.05857e+07	0.005	0.01683	30.39	0.338085	2	1091.56	-0.916683	54.7657	0	C1203	55.56	B1503	85	B1503	1.7
High	FTSPFCLQV	1	1	1	Q99873		0	3.33026e+06	0.005	0.01683	29.78	0.39133	2	1041.51	-0.0475105	90.9804	0	C1203	85.19	A6802	11.3	A6802	0.09
High	IQTRGGTF	5	1	1	O14672		0	1.99155e+07	0.005	0.01683	29.02	0.496056	2	879.468	-0.0943953	31.2101	0	C1203	26.67	B1503	45.7	B1503	1.1
High	RQKFSEQVF	2	1	1	O75955		0	8.50791e+06	0.005	0.01683	29.01	0.409026	2	1168.61	-1.75164	39.2858	0	C1203	33.33	B1503	3.6	B1503	0.03
High	GQIEPSFVF	2	1	1	O00443		0	5.9001e+06	0.005	0.01683	28.26	0.714601	2	1023.51	-0.165512	84.1642	0	C1203	37.04	B1503	3.3	B1503	0.02
High	KSVDWLLVF	3	1	1	Q96J42		0	1.60805e+07	0.005	0.01683	28.19	0.462245	2	1106.62	0.374317	91.4715	0	C1203	70.37	B1503	10.8	B1503	0.25
High	EVVSHTSQV	1	1	1	Q8IX04		0	1.93189e+07	0.005	0.01683	27.41	0.616821	2	985.494	-0.69208	26.3515	0	C1203	40.74	A6802	8.1	A6802	0.05
High	EVSLPSVEV	1	1	1	Q8IVF2		0	9.3548e+06	0.005	0.01683	26.9	0.763508	2	958.509	0.00164024	74.163	0	C1203	48.15	A6802	7.5	A6802	0.05
High	IATEIILEI	1	1	1	P42892		0	6.59733e+07	0.005	0.01683	25.61	0.580218	2	1014.61	-0.170026	93.433	0	C1203	81.48	C1203	36.4	C1203	0.17
High	MTVDDLLSL	5	1	1	Q86W92		0	5.43305e+06	0.005	0.01683	25.25	0.952486	2	1006.51	-0.203276	98.8774	0	C1203	74.07	C1203	24.4	C1203	0.1
High	VTFSGIHLL	3	1	1	Q8N3Z3		0	4.76155e+06	0.005	0.01683	24.96	1.37843	2	986.567	-0.225302	74.8044	0	C1203	81.48	C1203	35.6	C1203	0.17
High	HQASHQPLY	2	1	1	Q99941		0	2.88164e+06	0.005	0.01683	24.16	1.62135	2	1080.52	0.575071	23.6962	0	C1203	44.44	B1503	3.8	B1503	0.03
High	MLFSDSPFL	5	1	1	Q96CP6		0	7.08137e+06	0.005	0.01683	22.86	1.6227	2	1056.51	-0.783824	95.4463	0	C1203	44.44	B1503	32.9	C1203	0.5
High	RAFPNKQGY	2	1	1	O43684		0	5.71697e+06	0.005	0.01683	22.25	2.23939	2	1080.56	-0.924138	27.2797	0	C1203	85.19	B1503	11.2	B1503	0.25
High	SKTGGYLVY	2	1	1	P46087		0	2.36481e+07	0.005	0.01683	22.12	3.05561	2	987.514	-0.326588	46.9072	0	C1203	48.15	B1503	7.4	B1503	0.12
High	RQYPTPFQL	2	1	1	Q8ND82		0	1.31663e+07	0.005	0.01683	21.95	2.29456	2	1149.6	-0.638119	64.0089	0	C1203	51.85	B1503	7.2	B1503	0.12
High	KKSEGSLAY	1	1	1	Q96KP1		0	3.912e+06	0.005	0.01683	21.21	2.44873	2	982.52	-0.0498659	22.7125	0	C1203	48.15	B1503	5.5	B1503	0.07
High	RQSVAGTY	2	1	1	Q9BX59		0	3.26709e+06	0.005	0.01683	20.79	3.24135	2	881.448	-0.0271549	25.4305	0	C1203	30	B1503	11.9	B1503	0.25
High	HQKLGIAY	7	1	1	Q9HB58		0	1.80232e+07	0.005	0.01683	20.3	3.43531	2	929.52	-0.502706	35.0181	0	C1203	36.67	B1503	32.3	B1503	0.8
High	FTAKVWDAV	4	1	1	Q9Y3F4		0	1.0183e+07	0.005	0.01683	20.17	4.47438	2	1036.55	-0.0686155	62.0012	0	C1203	74.07	A6802	3.4	A6802	0.01
High	ARAGVVLEM	2	1	1	Q9UKP3		0	1.38677e+07	0.005	0.01683	20.04	3.43621	2	945.518	-0.277223	50.0458	0	C1203	51.85	B1503	49.4	C1203	1
High	GQSRLIFTY	3	1	1	Q96Q89		0	1.13868e+07	0.005	0.01683	19.95	3.54559	2	1084.58	-1.18313	59.7263	0	C1203	48.15	B1503	7.6	B1503	0.12
High	AAAHFYFEL	1	1	1	A7E2V4		0	2.75288e+07	0.005	0.01683	19.63	3.22214	2	1068.52	0.113192	73.3043	0	C1203	85.19	C1203	110.6	C1203	0.5
High	AKYPIKQSL	2	1	1	P21283		0	1.44253e+07	0.005	0.01683	19.54	1.83602	2	1047.62	-0.877502	33.5849	0	C1203	51.85	B1503	134.5	B1503	2.5
High	GKAFSQKQY	1	1	1	Q15072		0	1.75916e+06	0.005	0.01683	19.11	4.55073	2	1056.55	-0.936119	22.4715	0	C1203	44.44	B1503	99.7	B1503	1.9
High	DLIHEIYTV	1	1	1	P18124		0	8.39609e+06	0.005	0.01683	18.12	7.34466	2	1102.58	-0.113291	81.0295	0	C1203	44.44	A6802	154.3	A6802	1.1
High	GKSSGPTSLF	1	1	1	Q00839		0	8.95465e+06	0.005	0.01683	17.95	6.08913	2	980.504	-0.53266	47.1849	0	C1203	34.29	B1503	75.7	B1503	1.5
High	ETFYIGKLI	2	1	1	Q7KZ85		0	7.01757e+06	0.005	0.01683	17.16	4.26734	2	1083.61	-0.0602282	76.6382	0	C1203	66.67	A6802	19.4	A6802	0.17
High	STYPAPFYV	1	1	1	P15923		0	6.14368e+06	0.005	0.01683	17	6.40778	2	1044.5	0.251362	78.3883	0	C1203	81.48	A6802	4.5	A6802	0.01
High	AQLFGGSHIY	1	2	2	O95970;Q8N0V4		0	9.0633e+06	0.005	0.01683	17	8.07782	2	1092.55	-0.793543	40.5847	0	C1203	37.14	B1503	4.5	B1503	0.04
High	DVAQIFNNIL	2	1	1	Q9Y376		0	962059	0.005	0.01683	15.34	13.6909	2	1146.62	0.747623	104.863	0	C1203	28.57	A6802	192.7	A6802	1.2
High	LQKANQEQY	3	1	1	Q9UBU8		0	1.66871e+06	0.005	0.01683	14.72	14.0042	2	1121.56	-0.717255	24.6977	0	C1203	37.04	B1503	15.6	B1503	0.4
High	ETIGVVHLV	1	1	1	Q63HN8		0	5.61694e+07	0.005	0.01683	14.67	6.58161	2	966.562	-0.278543	61.991	0	C1203	74.07	A6802	2.1	A6802	0.01
High	SQWLGGSSW	2	1	1	P04792		0	3.4253e+06	0.005	0.01683	14.47	8.57633	2	1007.46	-0.0445215	74.9553	0	C1203	0	B1503	12.4	B1503	0.3
High	EVFPVSKTL	2	1	1	Q5UIP0		0	1.21324e+07	0.005	0.01683	14.4	10.7507	2	1019.58	0.154811	56.4959	0	C1203	55.56	A6802	61.1	A6802	0.6
High	KQFEKQVEL	2	1	1	Q14204		0	6.68613e+06	0.005	0.01683	14.37	12.7008	2	1148.63	-0.231925	35.3308	0	C1203	51.85	B1503	12.1	B1503	0.3
High	HTFFIKDSL	1	1	1	Q8NFG4		0	6.6026e+06	0.005	0.01683	14.24	16.5825	2	1107.58	-0.165964	54.0653	0	C1203	70.37	A6802	12.6	A6802	0.1
High	MLYGTITEF	1	1	1	Q9H8S9		0	7.24159e+06	0.005	0.01683	13.74	15.4063	2	1074.52	-0.705432	83.6209	0	C1203	44.44	B1503	2.7	B1503	0.01
High	EVVHTPETSV	3	1	1	O15427		0	2.81136e+07	0.005	0.01683	13.59	14.7226	2	1097.55	-0.742485	39.9202	0	C1203	25.71	A6802	83.1	A6802	0.7
High	RQYGSEGRF	1	2	2	Q7Z7H5;Q9BVK6		0	1.60335e+06	0.005	0.01683	13.41	14.8235	2	1099.53	-0.0833721	26.7367	0	C1203	37.04	B1503	3.6	B1503	0.03
High	NKAEVHESY	1	1	1	Q15067		0	659343	0.005	0.01683	11.07	24.5861	2	1076.5	-0.417613	21.1569	0	C1203	44.44	B1503	115.1	B1503	2
High	ITADVNHNL	4	1	1	Q16222		0	2.12288e+07	0.006	0.01829	40.2	0.0310325	2	996.509	-1.84695	39.3895	0	C1203	74.07	A6802	22.9	A6802	0.25
High	TASPLVKSV	8	1	1	Q6P4F7		0	2.24039e+07	0.006	0.018	39.67	0.0321688	2	901.535	-0.434361	37.4569	0	C1203	92.59	C1203	131.3	C1203	0.6
High	SVAEITNAC	1	5	5	Q71U36;P68363;Q13748;Q6PEY2;P68366		0	7.69745e+06	0.006	0.01683	36.65	0.0894392	2	907.419	-0.211032	50.0106	0	C1203	7.41	A6802	76.6	A6802	0.7
High	EVAQAGKAV	1	1	1	Q9UPN9		0	3.6771e+06	0.006	0.01974	36.64	0.10832	2	872.483	-0.386637	23.1962	0	C1203	44.44	A6802	79.3	A6802	0.7
High	IASPVIAAV	3	1	1	Q6ZMZ0		0	1.23849e+07	0.006	0.01879	35.63	0.0356406	2	840.519	0.057384	66.4696	0	C1203	88.89	C1203	11.1	C1203	0.03
High	AARPATSTL	2	1	1	Q04637		0	2.34219e+07	0.006	0.02114	34.3	0.196208	2	887.494	-0.202785	27.7701	0	C1203	88.89	C1203	72.5	C1203	0.4
High	EAVSVIQSI	2	1	1	Q9P035		0	2.39487e+07	0.006	0.01784	33.73	0.168695	2	945.525	-0.37379	69.1985	0	C1203	74.07	A6802	29.9	A6802	0.3
High	EVSKAIINI	2	1	1	Q9NXP7		0	2.01419e+07	0.006	0.02181	32.74	0.146596	2	986.588	-0.24743	55.262	0	C1203	40.74	A6802	19.1	A6802	0.17
High	ELFSGGNTGI	5	2	2	O00571;O15523		0	9.46862e+06	0.006	0.01683	32.48	0.257357	2	994.484	-0.301753	66.5259	0	C1203	25.71	A6802	297.4	A6802	1.6
High	EIYSESHRV	3	1	1	Q96I51		0	5.06487e+06	0.006	0.02244	32.06	0.236661	2	1119.54	-0.58718	28.6249	0	C1203	44.44	A6802	15.4	A6802	0.15
High	IQRQNEQMM	2	1	1	Q96PP8		0	3.88922e+06	0.006	0.02181	31.76	0.188073	2	1177.54	-0.59279	30.3495	0	C1203	29.63	B1503	15.8	B1503	0.4
High	GAYEQVIKY	3	1	1	P98194		0	3.86264e+07	0.006	0.02119	31.02	0.328922	2	1070.55	-1.39443	51.3842	0	C1203	88.89	B1503	35.1	C1203	0.5
High	SQGPTLQF	2	1	1	Q15022		0	1.00127e+07	0.006	0.01856	30.78	0.517907	2	877.441	-0.19438	63.3578	0	C1203	33.33	B1503	78.2	B1503	1.6
High	AALTFPVLF	4	1	1	Q05D32		0	9.80353e+06	0.006	0.01974	30	0.2597	2	978.565	-0.651075	103.914	0	C1203	77.78	B1503	26.2	B1503	0.7
High	SAYPLSVEWL	1	1	1	Q13610		0	3.01697e+06	0.006	0.02135	28.82	0.584126	2	1164.59	-0.137312	95.9129	0	C1203	62.86	C1203	295.9	C1203	1.1
High	STFDHPELV	1	1	1	P78371		0	1.3002e+07	0.006	0.01779	28.14	0.536349	2	1044.5	-0.00948989	54.2395	0	C1203	77.78	A6802	10.4	A6802	0.08
High	KANPGAWIL	3	2	2	Q9NYU2;Q9NYU1		0	6.78335e+07	0.006	0.01997	28.07	0.341698	2	969.55	-1.25694	61.4484	0	C1203	81.48	B1503	352.7	C1203	1.4
High	RVPNSVLWL	1	1	1	O15294		0	2.37033e+07	0.006	0.02121	27.9	0.230135	2	1083.63	-0.528416	71.9273	0	C1203	44.44	C1203	317.4	C1203	1.2
High	RKSLNSIEF	2	1	1	P78527		0	1.62258e+07	0.006	0.01921	27.8	0.500282	2	1093.6	-0.499631	40.6507	0	C1203	40.74	B1503	9.5	B1503	0.2
High	QAYSGIQQY	3	2	2	Q92879;O95319		0	13394678	0.006	0.0217	27.73	0.482438	2	1057.49	-0.683764	50.1658	0	C1203	85.19	B1503	12.6	C1203	0.15
High	NVTSIMFLV	1	2	2	P29992;P50148		0	8.2773e+06	0.006	0.01702	27.68	0.595167	2	1023.55	-0.489172	98.3164	0	C1203	40.74	A6802	4	A6802	0.01
High	LKSVNELIY	4	1	1	P18124		0	3.69258e+07	0.006	0.0225	27.41	0.414936	2	1078.61	-1.14646	58.5519	0	C1203	44.44	B1503	15.1	B1503	0.4
High	STIGQAFEL	1	2	2	P29353;Q6S5L8		0	1.13242e+07	0.006	0.02216	26.66	1.00184	2	965.494	-0.314272	76.021	0	C1203	74.07	A6802	37.5	A6802	0.4
High	NTIDPSHPm	1	1	1	P49588	M9(Oxidation)	0	2.95602e+06	0.006	0.02033	26.03	0.461375	2	1027.45	-0.618139	29.8009	0	C1203	62.96	A6802	9.3	A6802	0.07
High	MSVHLPFAV	1	1	1	Q9NVA2		0	4.57708e+06	0.006	0.02139	25.65	1.08677	2	1000.53	0.171696	76.6442	0	C1203	70.37	A6802	5.3	A6802	0.03
High	ETADVKASV	1	1	1	Q8N1F7		0	1.95361e+07	0.006	0.01913	25.13	1.31937	2	919.473	-0.353878	30.384	0	C1203	74.07	A6802	2.2	A6802	0.01
High	EVIRDVINV	5	1	1	Q6IEG0		0	5.33191e+07	0.006	0.01767	25.07	0.829272	2	1056.6	-0.516423	60.6647	0	C1203	44.44	A6802	7.8	A6802	0.05
High	RHKSHDNVY	1	1	1	Q86SQ0		0	1.31467e+06	0.006	0.01724	24.56	1.14677	2	1155.56	-0.462428	16.2052	0	C1203	44.44	B1503	15.5	B1503	0.4
High	GKAFSRISY	1	2	2	Q8WV37;Q3KP31		0	6.69363e+06	0.006	0.01684	24.41	1.21732	2	1028.55	-0.21358	36.0574	0	C1203	44.44	B1503	12.6	B1503	0.3
High	VAFPKSLVA	2	1	1	Q8IWI9		0	4.97829e+07	0.006	0.02127	24.09	0.910125	2	931.561	0.0252536	58.4147	0	C1203	59.26	C1203	63.6	C1203	0.3
High	VKFDAVIGY	3	1	1	Q8NBQ5		0	7.37267e+06	0.006	0.0181	23.61	1.37208	2	1011.55	-0.773865	64.7125	0	C1203	55.56	B1503	10.4	B1503	0.25
High	STSAVNHNV	1	1	1	Q07157		0	4.87911e+06	0.006	0.02192	23.53	1.45393	2	928.448	-0.351866	20.5981	0	C1203	70.37	A6802	5.3	A6802	0.02
High	AKLKGIGEY	2	1	1	Q92620		0	1.08976e+07	0.006	0.01691	23.44	1.08446	2	978.561	-0.649361	33.7122	0	C1203	48.15	B1503	17.3	B1503	0.5
High	TIPDFIFANV	3	1	1	P61073		0	1.08815e+07	0.006	0.02114	23.07	2.05432	2	1136.6	-0.439179	100.544	0	C1203	28.57	A6802	11.3	A6802	0.09
High	KGFAFVEY	1	1	1	Q9UHX1		0	1.0127e+07	0.006	0.01731	22.26	2.63925	2	960.482	-0.307066	62.9474	0	C1203	40	B1503	237.5	B1503	3.5
High	YPVEIHEYL	1	1	1	Q13901		0	4.09403e+06	0.006	0.02264	22.18	2.59146	2	1162.58	-0.203842	65.9401	0	C1203	44.44	A6802	207.5	A6802	1.3
High	ETSSIMQKL	2	1	1	Q5VT06		0	3.59411e+07	0.006	0.01795	22.06	2.60122	2	1036.53	-0.256706	48.2502	0	C1203	74.07	A6802	22.9	A6802	0.25
High	KAFSRPWLL	4	5	5	Q9BWW7;Q9NQ03;O95863;O43623;Q3KNW1		0	1.44452e+07	0.006	0.01988	21.98	1.12544	2	1117.65	-0.501636	57.3249	0	C1203	85.19	C1203	49.6	C1203	0.25
High	AKFGSKEEY	4	1	1	Q5VWQ8		0	4.87843e+06	0.006	0.01683	21.88	2.39962	2	1058.52	-0.263627	25.4955	0	C1203	51.85	B1503	22	B1503	0.6
High	YTYPWVYNY	1	1	1	O00115		0	1.12539e+07	0.006	0.01976	21.87	1.47937	2	1268.56	-0.239683	86.3777	0	C1203	85.19	C1203	7.7	C1203	0.01
High	RQIKHMIKY	1	1	1	O15258		0	1.71755e+06	0.006	0.01995	21.79	1.56912	3	1216.7	-0.0616095	24.9918	0	C1203	40.74	B1503	3.4	B1503	0.02
High	NTAETITRV	3	1	1	O96006		0	1.15887e+07	0.006	0.01685	21.58	2.91528	2	1004.54	-0.348954	35.6744	0	C1203	77.78	A6802	4.8	A6802	0.02
High	KKSSGEIVY	2	1	1	Q02543		0	3.98778e+07	0.006	0.02141	21.52	1.83079	2	1010.55	-0.39995	24.1316	0	C1203	51.85	B1503	9.5	B1503	0.2
High	YQILQGIVF	4	1	1	P06493		0	5.59443e+06	0.006	0.02006	21.48	1.72789	2	1080.61	-0.591708	97.1742	0	C1203	40.74	B1503	3.3	B1503	0.02
High	DTNFINFSI	2	1	1	Q9Y324		0	2.59266e+06	0.006	0.02075	21.31	2.81864	2	1070.52	-0.260672	97.4529	0	C1203	59.26	A6802	5.9	A6802	0.03
High	KNAPALISEY	1	1	1	Q8IWB1		0	5889552	0.006	0.01755	19.98	5.43899	2	1105.59	-1.03765	49.8285	0	C1203	31.43	B1503	111.4	B1503	2
High	GKNEVTLEF	3	1	1	Q08945		0	1.53934e+07	0.006	0.02056	19.39	5.19586	2	1036.53	-0.538521	55.5988	0	C1203	40.74	B1503	17.3	B1503	0.5
High	VAFPSSSVY	1	1	1	P25205		0	8.86766e+06	0.006	0.01735	18.83	5.22364	2	956.473	0.188692	65.6568	0	C1203	92.59	B1503	4.3	C1203	0.01
High	AKQPHVGDY	2	1	1	Q06323		0	1.62861e+06	0.006	0.02169	18.72	4.50028	2	1014.5	-0.179035	25.1419	0	C1203	51.85	B1503	36.4	B1503	0.9
High	DTSPVFQRL	1	1	1	Q9NU22		0	0	0.006	0.01715	18.67	6.28899	2	1062.56	-0.778184	57.764	0	C1203	77.78	A6802	39.1	A6802	0.4
High	YKEKTGKEY	1	1	1	P07814		0	981349	0.006	0.02142	18.54	6.67603	2	1145.58	-0.38561	17.6609	0	C1203	48.15	B1503	219.7	B1503	3
High	QFETKKLY	1	1	1	O60613		0	8.19428e+06	0.006	0.01697	17.95	5.39332	2	1056.57	-0.708355	37.6816	0	C1203	30	B1503	357.6	B1503	4
High	ALRKSEIEY	2	1	1	P62888		0	1.05356e+07	0.006	0.01684	17.59	5.45447	2	1108.6	-0.736739	31.2349	0	C1203	48.15	B1503	60.5	B1503	1.3
High	FVYENPISL	2	1	1	Q6NTF9		0	2.19117e+07	0.006	0.0206	17.5	7.04465	2	1081.56	-0.0251645	82.507	0	C1203	55.56	C1203	3.5	C1203	0.01
High	KKIDRHMYH	1	1	1	P84098		0	1.3556e+06	0.006	0.01683	17.45	8.22174	3	1227.64	0.309203	17.5849	0	C1203	3.7	B1503	329.4	B1503	4
High	KSFEAPIKL	1	1	1	Q8TCT9		0	7.07716e+06	0.006	0.01747	17.16	4.1433	2	1032.61	-0.40215	49.6025	0	C1203	81.48	C1203	102	C1203	0.5
High	TTFEHAHNMRV	1	1	1	P13639		0	4.30804e+06	0.006	0.01913	17.16	6.85775	3	1342.63	-0.0354431	29.1602	0		0	A6802	103.8	A6802	0.8
High	EIADFFTEL	2	1	1	Q32NB8		0	3.79263e+06	0.006	0.01721	15.07	7.38566	2	1084.52	-0.965353	101.026	0	C1203	48.15	A6802	6.4	A6802	0.04
High	ETFMNRVEV	1	1	1	Q9UBU8		0	1.17162e+07	0.006	0.01803	14.55	11.566	2	1124.54	-0.178293	56.1448	0	C1203	77.78	A6802	4.8	A6802	0.02
High	EIYKEFFEV	1	1	1	O00255		0	1.04757e+07	0.006	0.02066	14.53	12.9285	2	1203.59	-0.467213	75.2301	0	C1203	44.44	A6802	7.5	A6802	0.05
High	FVIRNIVEA	1	2	2	Q5JNZ5;P62854		0	1.09806e+07	0.006	0.01683	14.11	9.92695	2	1060.61	-0.435359	61.753	0	C1203	14.81	A6802	39.3	A6802	0.4
High	SQARTLITF	3	1	1	Q8N1F7		0	1.41145e+07	0.006	0.01934	13.11	13.6285	2	1036.58	-0.776509	57.4766	0	C1203	40.74	B1503	2.9	B1503	0.01
High	GKYGEGAKQETF	1	1	1	P78383		0	6.42514e+06	0.006	0.01758	11.65	24.231	3	1314.63	-0.209183	29.2108	0		0	B1503	283.9	B1503	3.5
High	KKDSGGKVY	1	1	1	Q96MN5		0	299462	0.007	0.02387	39.27	0.0341248	2	981.536	-0.546149	16.2496	0	C1203	48.15	B1503	75.5	B1503	1.5
High	YAAGFIFTT	1	2	2	P22557;P13196		0	1.10345e+07	0.007	0.02852	36.97	0.0958538	2	990.493	-0.175447	82.0388	0	C1203	55.56	A6802	29.1	A6802	0.3
High	TTTQITKTV	2	1	1	P11171		0	1.31362e+07	0.007	0.02918	34.29	0.0707544	2	992.562	-0.531109	30.4748	0	C1203	74.07	A6802	44.9	A6802	0.4
High	GKGSFGEVF	1	2	2	Q9P289;Q9Y6E0		0	1.99526e+07	0.007	0.02851	34.04	0.151156	2	927.457	-0.495654	51.107	0	C1203	37.04	B1503	52	B1503	1.2
High	DVTAIIFVV	2	2	2	Q5JWF2;P63092		0	9.92325e+07	0.007	0.03032	33.72	0.0833104	2	976.571	-0.138929	107.33	0	C1203	44.44	A6802	14.6	A6802	0.12
High	AAKAVANTM	1	1	1	P48643		0	1.46195e+06	0.007	0.02854	32.56	0.292621	2	876.461	0.186887	22.7636	0	C1203	74.07	B1503	124.9	C1203	0.6
High	GKKGPQSLF	1	1	1	P46087		0	1.49787e+07	0.007	0.02283	31.4	0.222148	2	961.546	-0.671069	32.8109	0	C1203	33.33	B1503	99.4	B1503	1.9
High	AQAPAQSQF	3	1	1	Q92793		0	9.67424e+06	0.007	0.02731	29.94	0.366478	2	947.457	-1.40016	39.5157	0	C1203	44.44	B1503	3.7	B1503	0.03
High	LTSDIIESI	1	1	1	P32780		0	1.01809e+07	0.007	0.02467	27.75	0.632238	2	990.535	0.0370399	77.1893	0	C1203	70.37	A6802	14.7	A6802	0.12
High	AKIVAIKEF	1	1	1	Q9BXT8		0	5.31455e+07	0.007	0.02313	27.15	0.157864	2	1018.63	-1.47448	41.55	0	C1203	44.44	B1503	16.6	B1503	0.4
High	GQRPTQPVY	1	1	1	Q9H0W8		0	2.67358e+07	0.007	0.02897	27.14	0.823501	2	1045.54	-0.489233	31.7976	0	C1203	48.15	B1503	4.7	B1503	0.05
High	DTFSGQFVL	2	1	1	Q5T089		0	1.26044e+07	0.007	0.02835	27.12	0.760148	2	1013.49	0.0619472	88.5405	0	C1203	77.78	A6802	31.5	A6802	0.3
High	TTISKVSQV	1	1	1	Q9UNX4		0	9.86582e+06	0.007	0.02869	25.74	0.560974	2	962.551	-0.800353	33.4081	0	C1203	74.07	A6802	10.2	A6802	0.08
High	KAADIASKV	1	1	1	O95671		0	1.41924e+06	0.007	0.02567	25.66	0.866001	2	902.53	-0.389238	25.326	0	C1203	81.48	C1203	60.3	C1203	0.3
High	NPVDILTYV	1	4	4	Q6ZMR3;Q9BYZ2;P00338;P07195		0	2.68427e+07	0.007	0.02909	25.02	1.36817	2	1033.56	-0.498762	91.2561	0	C1203	40.74	A6802	60.7	A6802	0.6
High	ELGGIIAEV	1	1	1	Q96RL7		0	4.87839e+06	0.007	0.0284	24.5	1.16148	2	900.503	-0.837325	78.3567	0	C1203	48.15	A6802	74	A6802	0.6
High	KVPPFTFHV	2	1	1	Q6NZI2		0	33671799	0.007	0.02272	24.15	0.891868	2	1071.6	-0.286581	56.9284	0	C1203	44.44	A6802	46.2	A6802	0.5
High	EVNKVISSV	1	1	1	Q93008		0	6.8609e+07	0.007	0.02509	23.32	1.37883	2	974.55	-1.30179	40.5198	0	C1203	40.74	A6802	7.9	A6802	0.05
High	VAYPLYILY	1	1	1	Q99567		0	5.29494e+06	0.007	0.02779	23.19	1.50876	2	1114.62	-0.3174	97.5937	0	C1203	92.59	B1503	12.4	C1203	0.08
High	TATDIRVTL	1	1	1	P11047		0	1.10205e+07	0.007	0.02706	23.14	1.47698	2	989.563	-0.0845841	54.8619	0	C1203	85.19	C1203	119.7	C1203	0.6
High	RAFGGILVV	1	1	1	Q8NHX9		0	66922850	0.007	0.02422	22.98	0.510298	2	931.572	-0.0504964	67.4899	0	C1203	92.59	C1203	8.7	C1203	0.01
High	EVFQGVEKL	1	1	1	Q9Y330		0	2.33629e+07	0.007	0.02413	22.96	2.2059	2	1048.57	-0.661198	55.9457	0	C1203	44.44	A6802	78	A6802	0.7
High	MVNYNPETV	1	1	1	P27708		0	1.29803e+07	0.007	0.02403	22.41	2.01716	2	1066.49	-0.0553347	56.0307	0	C1203	44.44	A6802	24.9	C1203	0.2
High	AQSSLQEVY	1	1	1	P28066		0	8.13896e+06	0.007	0.02991	22.03	2.34448	2	1024.5	1.75129	50.9499	0	C1203	51.85	B1503	6.6	B1503	0.1
High	HAIKSVKIY	2	1	1	P53618		0	4.58506e+06	0.007	0.02732	21.45	1.34563	2	1058.64	-0.511853	29.5014	0	C1203	81.48	B1503	24.9	C1203	0.4
High	EVAPSFGTL	1	1	1	Q5SRE5		0	3.20383e+07	0.007	0.02826	21.4	4.03945	2	920.472	-0.157199	70.8247	0	C1203	51.85	A6802	10.3	A6802	0.08
High	GKREGIDQSY	2	1	1	O94952		0	2.55931e+06	0.007	0.02429	21.33	2.68163	2	1152.56	-0.142913	25.1556	0	C1203	40	B1503	173	B1503	3
High	HTADIQSEV	2	1	1	P08581		0	1.7796e+07	0.007	0.02518	21.3	2.30288	2	999.474	-0.154759	35.4743	0	C1203	77.78	A6802	3	A6802	0.01
High	KGRTPGSSY	1	1	1	Q96BH1		0	1.44359e+06	0.007	0.02799	20.86	3.14154	2	952.484	-0.420764	18.3633	0	C1203	37.04	B1503	69.8	B1503	1.5
High	RQLIVKEY	2	1	1	P12429		0	6.899e+06	0.007	0.02471	18.59	2.56236	2	1048.61	-0.654091	34.4108	0	C1203	40	B1503	49.1	B1503	1.1
High	HTAIGAHPV	1	1	1	Q92567		0	4.23074e+06	0.007	0.02867	18.44	6.9633	2	902.484	0.0556947	23.4004	0	C1203	70.37	A6802	6	A6802	0.03
High	AKINEIRQM	1	1	1	Q15366		0	3.56567e+06	0.007	0.03021	17.85	5.46152	2	1102.6	-0.769477	32.0686	0	C1203	40.74	B1503	48.4	B1503	1.1
High	ETYNGHLVSC	1	1	1	Q9Y4Z0		0	2.03084e+08	0.007	0.02636	17.58	3.58243	2	1122.49	-0.987997	43.2045	0	C1203	28.57	A6802	92.5	A6802	0.8
High	EIFPVSFHV	1	1	1	Q5THK1		0	1.06847e+07	0.007	0.03021	16.44	9.27694	2	1074.56	-0.307347	79.112	0	C1203	48.15	A6802	2.7	A6802	0.01
High	YSIPLVQLF	1	1	1	O94822		0	1.61774e+06	0.007	0.02629	13.99	9.27134	2	1079.61	-0.0169604	104.533	0	C1203	74.07	C1203	10.8	C1203	0.03
High	FASFIVQYY	1	1	1	Q6P2Q9		0	4.25057e+06	0.007	0.02447	13.95	16.598	2	1137.56	-0.295786	89.2884	0	C1203	85.19	C1203	9.5	C1203	0.02
High	RAYDGTTYL	3	1	1	Q53GS9		0	27542919	0.007	0.02942	13.81	16.1727	2	1059.51	-0.485069	46.2608	0	C1203	81.48	C1203	4.5	C1203	0.01
High	HTAEITHEI	2	1	1	Q00597		0	5.52379e+06	0.007	0.02517	12.57	23.2573	2	1050.52	-0.416562	30.8638	0	C1203	70.37	A6802	2.5	A6802	0.01
High	RHKDRDYLF	1	1	1	Q9UBK8		0	4.22026e+06	0.007	0.02881	12.28	28.5488	3	1249.64	0.0316972	29.8037	0	C1203	33.33	B1503	199	B1503	3
High	AKQRLQQLF	1	1	1	Q9P0U1		0	1.14593e+07	0.008	0.03766	35.5	0.0469261	2	1131.66	-1.91832	41.4361	0	C1203	33.33	B1503	69.4	B1503	1.5
High	TTSNTVSKL	2	1	1	Q6NZI2		0	4.89267e+06	0.008	0.03068	32.1	0.1843	2	950.515	-0.411486	27.058	0	C1203	74.07	A6802	219.5	A6802	1.3
High	RKGAGSVF	1	1	1	P62917		0	1.30075e+07	0.008	0.03391	32.07	0.152175	2	821.463	-0.0549587	22.2239	0	C1203	36.67	B1503	126.3	B1503	2.5
High	EIAKVTEGV	1	1	1	A0AV96		0	3.50301e+06	0.008	0.03204	31.45	0.285168	2	945.525	-0.190711	38.634	0	C1203	40.74	A6802	3	A6802	0.01
High	TVSDVLNSV	1	1	1	Q14746		0	5.98921e+06	0.008	0.03121	31	0.320233	2	933.489	-0.299249	66.7102	0	C1203	44.44	A6802	4.1	A6802	0.01
High	IAISRTPVL	1	1	1	Q9H3K2		0	6.63245e+06	0.008	0.03389	29.66	0.127663	2	969.609	-0.327986	54.1098	0	C1203	81.48	C1203	35.6	C1203	0.17
High	YKKGDANTY	1	1	1	Q9NVX7		0	1.8786e+06	0.008	0.03166	29.41	0.441309	2	1059.51	-0.600283	19.2525	0	C1203	48.15	B1503	21.1	B1503	0.6
High	FAQEAISVL	1	1	1	P30154		0	3.00711e+07	0.008	0.03127	29.31	0.552807	2	977.53	-0.386188	74.2465	0	C1203	88.89	C1203	7.4	C1203	0.01
High	GKLKPTMAF	1	1	1	Q6YN16		0	2.0273e+07	0.008	0.0316	28.7	0.150544	2	992.559	-1.30171	40.0488	0	C1203	29.63	B1503	7.2	B1503	0.12
High	AAASIANIV	2	1	1	P17987		0	1.40188e+07	0.008	0.03247	28.1	0.686048	2	829.478	-0.233404	64.6386	0	C1203	85.19	C1203	94.9	C1203	0.5
High	AAKDPSPSV	1	1	1	O75153		0	2.28507e+06	0.008	0.03469	27.69	0.632948	2	871.452	-0.219719	24.6509	0	C1203	81.48	C1203	463.4	C1203	1.6
High	SASPIFTHV	1	1	1	Q9HCG8		0	8.08782e+06	0.008	0.03689	27.22	0.905867	2	958.499	-0.102445	50.099	0	C1203	85.19	A6802	14	A6802	0.12
High	HKVISGTTL	1	1	1	Q9NUL3		0	9.22097e+06	0.008	0.03354	26.58	0.497046	2	955.557	-0.474149	29.0139	0	C1203	40.74	B1503	36.3	B1503	0.9
High	FASEYPLIL	1	1	1	Q9UPR0		0	1.10318e+07	0.008	0.03327	25.75	0.69578	2	1052.57	-0.212492	90.9545	0	C1203	92.59	C1203	8.6	C1203	0.01
High	ELSNVLAAM	1	1	1	Q9Y3U8		0	5.74475e+06	0.008	0.03728	24.82	1.69353	2	947.487	0.236141	78.6684	0	C1203	33.33	A6802	96	A6802	0.8
High	RKLTPGEVY	1	1	1	Q15818		0	7227406	0.008	0.03357	23.71	1.44406	2	1062.59	-0.551266	33.366	0	C1203	40.74	B1503	13.2	B1503	0.3
High	EVDATSKYSV	1	1	1	Q9UK61		0	4.0304e+06	0.008	0.03156	23.61	1.37556	2	1098.53	-0.742923	38.7982	0	C1203	25.71	A6802	45.3	A6802	0.4
High	DSSEIHFKV	2	1	1	P63165		0	1.63513e+07	0.008	0.03602	22.62	2.76681	2	1061.53	-0.181554	46.2768	0	C1203	74.07	A6802	12.9	A6802	0.12
High	KQHVTEAF	1	1	1	O43175		0	1.99392e+06	0.008	0.03083	22.34	3.04325	2	959.494	-0.240758	25.2815	0	C1203	30	B1503	19	B1503	0.5
High	TVADHIQKV	1	1	1	Q9Y678		0	2.89244e+06	0.008	0.037	19.92	2.60607	2	1010.56	-0.530172	29.3371	0	C1203	48.15	A6802	15.5	A6802	0.15
High	RKDDPRLSF	2	1	1	P78527		0	2.21729e+07	0.008	0.03217	19.14	4.59681	2	1133.61	-0.101093	33.4076	0	C1203	37.04	B1503	76.8	B1503	1.6
High	RKAPQHTAV	1	1	1	O43242		0	2.60025e+06	0.008	0.03193	18.3	3.14384	2	1007.57	-0.626418	16.4024	0	C1203	48.15	B1503	104	B1503	1.9
High	GQFQKIVLY	1	1	1	P53675		0	7.65994e+06	0.008	0.03489	17.12	4.54555	2	1095.62	-0.39339	61.2927	0	C1203	48.15	B1503	4.9	B1503	0.05
High	GLGmNKISIF	1	1	1	A4D0V7	M4(Oxidation)	0	5.93167e+07	0.008	0.03663	16.91	7.30687	2	1095.58	-3.26659	75.3396	0	C1203	28.57	B1503	268.7	B1503	3.5
High	YKEKTGQEY	1	1	1	P07814		0	1.15847e+06	0.008	0.03401	16.63	7.63053	2	1145.55	-0.374233	20.8903	0	C1203	44.44	B1503	140	B1503	2.5
High	AKKKANLQY	2	1	1	P17980		0	1.96574e+06	0.008	0.03133	16.33	3.68304	2	1063.63	-0.334159	18.7632	0	C1203	44.44	B1503	39.4	B1503	1
High	AAIDHQIEV	1	1	1	Q9Y485		0	2.0753e+07	0.008	0.03103	14.88	12.0169	2	995.515	-0.315291	45.3274	0	C1203	88.89	C1203	35.4	C1203	0.17
High	YAYRDAVFL	1	1	1	P30260		0	6.79163e+06	0.008	0.03614	14.39	15.0752	2	1117.57	-1.00699	65.316	0	C1203	85.19	C1203	6.7	C1203	0.01
High	KKKQIEQKF	1	1	1	Q9NQS7		0	1.40038e+06	0.008	0.03752	14.08	3.94163	2	1176.71	-0.0720943	18.038	0	C1203	29.63	B1503	242.7	B1503	3.5
High	KKYGQPIQM	1	1	1	O95757		0	1.58513e+07	0.008	0.03108	13.82	10.9818	2	1092.59	-0.658978	32.2171	0	C1203	44.44	B1503	18.7	B1503	0.5
High	DTATAHSWFV	1	1	1	Q13425		0	9.37025e+06	0.008	0.03085	11.96	18.2665	2	1134.52	-0.82492	65.4555	0	C1203	40	A6802	10.6	A6802	0.08
High	DAARAIAGV	1	1	1	O75821		0	7.29364e+06	0.009	0.03915	49	0.00390519	2	843.468	-0.556309	42.1515	0	C1203	81.48	A6802	5.9	A6802	0.03
High	SAFATPFLV	2	1	1	P15954		0	6.78647e+07	0.009	0.03892	36.93	0.0784612	2	952.513	-0.757095	90.2651	0	C1203	81.48	A6802	16.1	C1203	0.08
High	QQVPVNQVF	1	1	1	P39023		0	1.42387e+07	0.009	0.03827	32.64	0.239418	2	1058.56	-0.16018	63.1697	0	C1203	40.74	B1503	4.5	B1503	0.04
High	GKRPGGSTF	1	1	1	O15399		0	1.0082e+07	0.009	0.03926	32.35	0.223178	2	906.479	-0.411372	20.4429	0	C1203	40.74	B1503	10.1	B1503	0.2
High	TTTHITKTV	2	2	2	O43491;Q9Y2J2		0	4.46623e+06	0.009	0.03819	29.09	0.513773	2	1001.56	-0.490182	21.6314	0	C1203	74.07	A6802	19.2	A6802	0.17
High	ELSDVLIYL	1	1	1	Q9H773		0	1.35111e+07	0.009	0.03879	28.54	0.359414	2	1064.59	0.00811817	103.019	0	C1203	48.15	A6802	16.7	A6802	0.15
High	DVSDILKLL	1	1	1	Q9H446		0	888885	0.009	0.0393	28.08	0.298434	2	1015.6	-0.120339	102.876	0	C1203	48.15	A6802	106.8	A6802	0.8
High	EVYPGTYSV	1	1	1	Q9NQ31		0	30545428	0.009	0.03825	26.72	0.635356	2	1014.48	-0.280577	60.5537	0	C1203	48.15	A6802	2.4	A6802	0.01
High	EVDPNIQAV	2	1	1	P05787		0	3.89872e+07	0.009	0.03903	25.99	0.861171	2	984.5	0.165763	56.0562	0	C1203	48.15	A6802	90.4	A6802	0.7
High	ESAPIGIRV	1	1	1	O75054		0	1.18483e+07	0.009	0.03918	25.29	0.7327	2	941.541	-0.346247	51.6977	0	C1203	81.48	A6802	7	A6802	0.04
High	QSFPEPLII	1	1	1	Q9NRL2		0	16509693	0.009	0.03882	23.55	1.60202	2	1043.58	-0.0242088	89.0821	0	C1203	77.78	C1203	112.5	C1203	0.5
High	NIAQVLAEL	1	2	2	Q10567;P63010		0	1.98348e+06	0.009	0.03848	23.43	1.18388	2	970.557	0.0515469	95.8601	0	C1203	44.44	A6802	30.1	A6802	0.3
High	RQAKEERTF	1	1	1	P35579		0	906851	0.009	0.03922	22.1	2.28603	2	1164.61	-0.475271	18.067	0	C1203	40.74	B1503	5.3	B1503	0.06
High	DTFRGVAFV	1	1	1	O15067		0	3.51749e+07	0.009	0.03916	21.96	2.37047	2	1011.53	-0.297576	67.9194	0	C1203	74.07	A6802	3.7	A6802	0.01
High	GQHSHVVRY	1	1	1	P30291		0	758749	0.009	0.03933	19.37	3.90824	2	1082.55	-0.359999	19.1575	0	C1203	48.15	B1503	4.3	B1503	0.04
High	EAMKQILGV	1	1	1	Q14444		0	2.29654e+07	0.009	0.03902	19.09	4.88371	2	988.55	-0.0335384	57.2527	0	C1203	81.48	A6802	13.4	A6802	0.12
High	AKRKTVTAm	1	2	2	Q99525;P62805	M9(Oxidation)	0	508979	0.009	0.03946	18.93	2.58691	2	1021.58	-0.550741	15.9125	0	C1203	37.04	B1503	16.4	B1503	0.4
High	KAYGKAKSI	1	2	2	Q99613;B5ME19		0	965661	0.009	0.03931	18.09	1.88227	2	965.578	-0.204005	17.1316	0	C1203	77.78	C1203	73.9	C1203	0.4
High	RKVADVSQF	1	1	1	Q5TKA1		0	5.64279e+06	0.009	0.03941	13.79	14.225	2	1049.57	-0.786657	33.2777	0	C1203	33.33	B1503	7.4	B1503	0.12

## Sheet: Statistics
Total_Peptides	Tool	A*68:02	B*15:03	C*12:03
1509	Total Syfpeithi allelecoverage with threshold	0	0	465
	Total Syfpeithi allelecoverage with threshold %	0.0000	0.0000	0.3082
	Total NetMHC allelecoverage with threshold	519	888	588
	Total NetMHC allelecoverage with threshold %	0.3439	0.5885	0.3897
	Total NetMHC allelecoverage with 50nM threshold	351	634	267
	Total NetMHC allelecoverage with 50nM threshold %	0.2326	0.4201	0.1769
	Best Syfpeithi	0	0	1445
	Best Syfpeithi %	0.0000	0.0000	0.9576
	Best NetMHC	456	790	263
	Best NetMHC %	0.3022	0.5235	0.1743
	Best Syfpeithi with threshold	0	0	465
	Best Syfpeithi with threshold %	0.0000	0.0000	0.3082
	Best NetMHC with threshold	414	739	236
	Best NetMHC with threshold %	0.2744	0.4897	0.1564
	Best NetMHC with 50nM threshold	312	588	166
	Best NetMHC with 50nM threshold %	0.2068	0.3897	0.1100
