# Supplementary material for: TAPBPR mediates peptide dissociation from MHC class I using a leucine lever
Source: eLife. 2018 Nov 28;7:e40126. doi: 10.7554/eLife.40126 (PMC6307860; doi:10.7554/eLife.40126)
Supplement: Figure 5—source data 6. [file elife-40126-fig5-data6.xlsx]

## Sheet: Filteredpeptides
A2	Sequence	# PSMs	# Proteins	# Protein Groups	Protein Group Accessions	Modifications	ΔCn	Area	q-Value	PEP	IonScore	Exp Value	Charge	MH+ [Da]	ΔM [ppm]	RT [min]	# Missed Cleavages	best_Syf_Allele	best_Syf_Score	best_NetMHC_Allele	best_NetMHC_Score	best_NetMHC_Allele_Rank	best_NetMHC_Rank
High	AAYSDGYGRVY	11	1	1	O43251		0	2.33578e+07	0	6.595e-05	80.45	2.51493e-06	2	1221.55	-0.0892099	46.095	0		0	B1503	57.2	B1503	1.3
High	AAASAIKVI	7	1	1	P14902		0	8.76164e+06	0	0.0003835	75.72	6.77026e-06	2	843.53	-0.0575498	42.9321	0	C1203	88.89	C1203	146	C1203	0.7
High	AAANAIRVY	10	1	1	Q9NRK6		0	1.27332e+07	0	0.0001599	73.24	1.63566e-05	2	948.526	-0.397317	39.7908	0	C1203	92.59	B1503	11.3	C1203	0.12
High	FASGLIHRV	80	1	1	Q8N6L1		0	2.41738e+09	0	0.0007272	72.55	1.38253e-05	2	999.572	-1.46388	40.553	0	C1203	88.89	A6802	15.6	C1203	0.08
High	SAYGSVKAY	50	2	2	P07355;A6NMY6		0	5.32263e+08	0	0.001447	72.47	2.61178e-05	2	945.467	-0.77823	35.1901	0	C1203	88.89	B1503	7.5	C1203	0.01
High	GAYGQAVRY	16	1	1	Q9UID3		0	3.14803e+07	0	0.005805	71.09	2.41152e-05	2	984.489	-0.359393	36.3891	0	C1203	85.19	B1503	41.5	C1203	0.5
High	SQFGGGSQY	41	1	1	O15371		0	2.69613e+08	0	0.003294	70.7	5.16215e-06	2	930.394	-1.53259	41.6012	0	C1203	44.44	B1503	2.6	B1503	0.01
High	YKIGDLTGY	31	1	1	Q9NVN8		0	1.6169e+08	0	9.303e-05	69.35	4.44719e-05	2	1029.52	-0.205296	60.847	0	C1203	44.44	B1503	19.3	B1503	0.5
High	KLFGSTSSF	35	1	1	P08174		0	1.93986e+08	0	0.0006848	67.3	9.51433e-05	2	973.499	-0.451547	51.9749	0	C1203	37.04	B1503	2.9	B1503	0.01
High	MASALVHIL	27	1	1	Q5VWQ8		0	4.71953e+07	0	0.001548	66.23	4.67054e-05	2	954.544	-0.357756	65.2555	0	C1203	81.48	C1203	22.8	C1203	0.09
High	NTVDFFNQI	96	2	2	Q9H8S9;Q7L9L4		0	1.85556e+09	0	0.002382	65.79	9.83352e-05	2	1097.53	-0.286822	84.995	0	C1203	62.96	A6802	3.5	A6802	0.01
High	ILGPPGSVY	37	3	3	P51965;Q96LR5;Q969T4		0	67336900	0	0.0006124	65.27	0.000192148	2	902.498	-0.219237	65.2712	0	C1203	48.15	B1503	14.6	B1503	0.4
High	DTAEIIKTL	37	1	1	P82909		0	1.65303e+08	0	0.001616	65.25	6.51858e-05	2	1003.57	-0.777783	63.155	0	C1203	85.19	A6802	32.9	A6802	0.3
High	LVANIIQNV	31	1	1	O94915		0	6.39628e+07	0	0.004443	65.05	4.75008e-05	2	983.588	-0.39753	72.8885	0	C1203	44.44	A6802	15.3	A6802	0.15
High	SGFSGVIRL	24	1	1	P11309		0	3.94779e+07	0	0.0004967	64.69	9.7897e-05	2	935.531	-0.402043	62.8203	0	C1203	51.85	C1203	196.7	C1203	0.8
High	DASPVTNNTI	30	1	1	O15164		0	1.19721e+08	0	0.003754	63.82	0.000152413	2	1031.5	-0.125604	49.6049	0	C1203	45.71	A6802	308.3	A6802	1.6
High	AAFLKAIGY	34	1	1	O75533		0	1.10731e+08	0	0.0003287	63.6	0.000100922	2	953.545	-0.514702	63.2194	0	C1203	85.19	B1503	29.1	B1503	0.7
High	YGYDNVKEY	15	1	1	Q96GN5		0	3.0465e+07	0	7.051e-05	63.26	0.000106002	2	1150.51	0.135003	45.4105	0	C1203	59.26	C1203	8.5	C1203	0.01
High	ETADVIAKVAF	13	1	1	O43617		0	1.55176e+07	0	0.001406	63.06	0.000175975	2	1163.63	-0.583363	66.5546	0		0	A6802	436	A6802	2
High	LAVPFCVNF	14	1	1	Q9Y266		0	4.83844e+07	0	0.0006625	63.03	0.00022005	2	1009.52	-0.399025	99.663	0	C1203	77.78	B1503	27	B1503	0.7
High	IGVDFALKV	5	2	2	Q13637;P57729		0	1.5619e+07	0	0.0008786	62.52	0.000120544	2	961.571	-0.494684	73.0453	0	C1203	44.44	C1203	353	C1203	1.3
High	SKFPTQISL	29	1	1	O15164		0	5.5438e+07	0	0.0009559	62.23	0.000193526	2	1020.57	-0.922555	59.7177	0	C1203	51.85	B1503	28.7	B1503	0.7
High	AKAPPPVFY	43	1	1	Q16643		0	4.87595e+07	0	0.0006374	61.76	0.000271757	2	989.545	-0.249256	49.4065	0	C1203	59.26	B1503	18.2	B1503	0.5
High	IAFPSANEV	23	1	1	Q9NXH9		0	2.30566e+07	0	0.001778	61.37	0.000495776	2	947.484	0.324905	66.4667	0	C1203	88.89	C1203	10.6	C1203	0.03
High	FVFPGELLL	61	1	1	Q15758		0	9.2251e+07	0	0.0007501	60.24	0.000242473	2	1034.59	0.293377	106.292	0	C1203	55.56	C1203	10.8	C1203	0.03
High	SQYPFPVTL	40	1	1	Q5R372		0	1.38432e+08	0	0.00251	60.16	0.000432759	2	1051.55	-0.653976	86.222	0	C1203	59.26	B1503	4.8	B1503	0.05
High	GQYGNPLNKY	57	1	1	O14672		0	1.01884e+09	0	0.0003907	59.56	0.000390804	2	1153.56	-0.339192	45.8253	0	C1203	34.29	B1503	14.8	B1503	0.4
High	SSSGIVYKV	21	1	1	Q9P2E3		0	8.07109e+07	0	0.003324	58.5	0.000335266	2	939.514	-0.67874	39.879	0	C1203	77.78	A6802	12.5	A6802	0.1
High	GKITDFIKF	11	1	1	P62701		0	2.68096e+07	0	0.0006575	58.48	0.000327518	2	1068.61	0.182562	65.8523	0	C1203	33.33	B1503	26.5	B1503	0.7
High	SQIRQSTAY	17	1	1	O43150		0	14145529	0	0.004286	58.39	0.000531337	2	1053.53	-0.787409	27.28	0	C1203	37.04	B1503	3.2	B1503	0.02
High	SSAPTARVF	33	1	1	O94906		0	1.14186e+08	0	0.001622	57.99	0.000622393	2	935.494	-1.04055	38.7216	0	C1203	77.78	B1503	17.5	C1203	0.17
High	DVAEFLYQV	41	1	1	Q9Y5M8		0	1.9676e+08	0	0.001702	57.99	0.000586809	2	1083.54	-0.158038	94.7933	0	C1203	44.44	A6802	3	A6802	0.01
High	SAAEEVKTY	13	1	1	Q5JRA6		0	1.77262e+07	0	0.0003691	57.97	0.000415487	2	997.483	-0.561854	30.2755	0	C1203	92.59	B1503	74	C1203	0.4
High	NAYDFIMKL	26	1	1	P08183		0	1.57763e+08	0	0.0006749	57.95	0.000588311	2	1114.56	-0.514453	82.0105	0	C1203	85.19	C1203	13.6	C1203	0.04
High	AKAPPTACY	101	1	1	P17676		0	2.18487e+08	0	0.003337	57.91	0.000820933	2	921.45	-0.424126	32.5912	0	C1203	51.85	B1503	9.8	B1503	0.2
High	AAQEAVKLY	10	1	1	O60506		0	2.10691e+07	0	0.001611	57.79	0.000691065	2	992.541	0.0241744	43.7437	0	C1203	88.89	B1503	68.4	C1203	0.9
High	IKISEGTGF	10	1	1	Q9Y2R4		0	1.16698e+07	0	0.001395	57.56	0.000598775	2	951.515	0.463416	49.6522	0	C1203	33.33	B1503	7.2	B1503	0.12
High	NAANIFERL	25	2	2	Q9Y6D6;Q9Y6D5		0	5.11602e+07	0	0.0005018	57.51	0.000743119	2	1047.56	-0.41472	62.5205	0	C1203	77.78	A6802	36.5	A6802	0.4
High	AVAAVLTQV	13	1	1	Q99720		0	8.69925e+06	0	0.001685	57.42	0.000562331	2	871.525	-0.0981018	63.515	0	C1203	44.44	A6802	23.4	A6802	0.25
High	YLADIFTKL	26	1	1	Q49AG3		0	6.93e+07	0	0.001489	57.14	0.000424453	2	1083.61	-0.848791	81.3738	0	C1203	48.15	C1203	22.6	C1203	0.09
High	YVSEILEKV	23	1	1	P42704		0	4.2543e+07	0	0.0006449	57.1	0.000393771	2	1079.6	-0.929663	60.7682	0	C1203	48.15	A6802	6.8	A6802	0.04
High	FAFSGVLRA	21	1	1	Q92766		0	6.8253e+07	0	0.002226	56.94	0.000534077	2	967.536	-0.161301	66.0674	0	C1203	55.56	C1203	14.8	C1203	0.05
High	YSIDLSERV	21	1	1	Q6NTF9		0	2.50955e+07	0	0.001977	56.8	0.000678186	2	1081.55	-0.935785	58.9286	0	C1203	74.07	A6802	19.6	A6802	0.17
High	AAYGYGIRY	32	3	3	P11216;P06737;P11217		0	1.4674e+08	0	0.003628	56.75	0.000868644	2	1033.51	-0.700804	51.5657	0	C1203	88.89	B1503	8.9	C1203	0.15
High	GKIGTVMTF	18	1	1	P30046		0	4.50704e+07	0	0.003093	56.74	0.000634131	2	953.512	-0.343682	55.9316	0	C1203	40.74	B1503	6	B1503	0.08
High	QVFPGLLERV	31	1	1	Q9UBB4		0	9.95098e+07	0	0.002429	56.67	0.000561553	2	1157.67	0.203036	72.9205	0	C1203	40	A6802	53.3	A6802	0.5
High	IALPSLRIL	33	1	1	P00403		0	8.80809e+07	0	0.005791	56.44	4.05171e-05	2	995.661	-0.725423	80.4002	0	C1203	85.19	C1203	139.2	C1203	0.7
High	SVSPVVRVAV	131	1	1	P13639		0	4733547546	0	0.00221	56.3	0.000349876	2	1012.61	-0.817645	51.3686	0	C1203	25.71	A6802	26.4	A6802	0.25
High	ITGPLIRIL	12	1	1	Q92616		0	1.40328e+07	0	0.00592	56.13	4.35149e-05	2	995.661	-0.602821	73.9743	0	C1203	81.48	C1203	675.2	C1203	2
High	SSYDKPITF	17	1	1	Q86X10		0	39570682	0	0.005206	56.11	0.000855948	2	1057.52	-1.16771	52.8035	0	C1203	77.78	C1203	10.8	C1203	0.03
High	AAFDGHAREL	12	1	1	Q3MIP1		0	1.87699e+07	0	0.005418	56.01	0.000808847	2	1086.53	-0.654633	33.8745	0	C1203	82.86	C1203	368.1	C1203	1.4
High	SKYEALQTF	3	2	2	O15525;O60675		0	1.9197e+07	0	0.000927	55.89	0.000944608	2	1086.55	-0.855375	50.4467	0	C1203	40.74	B1503	3.8	B1503	0.03
High	TVSEVIQGL	46	1	1	Q8WWW0		0	1.16603e+08	0	0.00113	55.82	0.00116483	2	945.525	0.0780712	69.5943	0	C1203	48.15	A6802	19.2	A6802	0.17
High	VKVIQQESY	32	1	1	P60228		0	1.11517e+08	0	0.0008798	55.82	0.000908117	2	1093.59	-0.258529	38.8258	0	C1203	40.74	B1503	88.8	B1503	1.7
High	AKVKFEERY	30	1	1	P61353		0	5.87035e+07	0	0.0007075	55.74	0.000849394	2	1169.63	-0.509902	28.4262	0	C1203	40.74	B1503	162.6	B1503	2.5
High	SVYEGGVFFL	23	3	3	P51965;Q96LR5;Q969T4		0	8.69142e+07	0	0.0003343	55.72	0.00107006	2	1117.56	-0.142532	96.3913	0	C1203	37.14	A6802	57.9	A6802	0.5
High	STADVIQHC	35	1	1	Q5SRE5		0	1.93552e+08	0	0.0008767	55.62	0.00062974	2	973.441	-0.19718	37.1303	0	C1203	40.74	A6802	182.6	A6802	1.2
High	YCAEIAHNV	74	1	1	P62910		0	4.67597e+08	0	0.0004876	55.53	0.000790012	2	1019.46	-0.645706	41.3687	0	C1203	48.15	A6802	42.5	A6802	0.4
High	GQYPTQPTY	45	1	1	Q15038		0	1.11679e+09	0	0.002948	55.3	0.00107011	2	1054.48	-0.0730049	49.4303	0	C1203	51.85	B1503	3.1	B1503	0.01
High	LTFAGVKMY	9	1	1	P58511		0	7.5879e+06	0	0.000239	55.15	0.00119386	2	1029.54	-0.060735	68.8469	0	C1203	77.78	C1203	32	C1203	0.15
High	ALIEFIRSEY	30	1	1	P26639		0	1.7412e+08	0	3.757e-05	54.96	0.00109581	2	1240.66	0.20715	74.104	0	C1203	31.43	B1503	60.8	B1503	1.3
High	IKYDPSIGIY	6	1	1	P62913		0	1.52974e+07	0	0.000123	54.73	0.000974874	2	1168.62	-0.379979	62.6752	0	C1203	42.86	B1503	13.3	B1503	0.3
High	AQNPANMSKY	19	2	2	P50502;Q8NFI4		0	4.05164e+07	0	0.0004345	54.65	0.000906621	2	1123.52	-0.473914	32.3562	0	C1203	34.29	B1503	7.9	B1503	0.15
High	EVFPDQFIHL	67	1	1	P07686		0	4.05897e+08	0	0.0004043	54.62	0.00151898	2	1244.63	-0.312114	83.7674	0	C1203	40	A6802	43.9	A6802	0.4
High	GKVGGLLAF	32	1	1	P28340		0	5.34604e+07	0	0.004226	54.61	0.000664031	2	861.519	0.0864093	63.0316	0	C1203	37.04	B1503	8.7	B1503	0.17
High	SAADGPRVF	6	1	1	Q9Y285		0	6.09206e+06	0	0.00222	54.43	0.00174827	2	919.463	-0.0194684	40.0748	0	C1203	85.19	B1503	36.3	C1203	0.25
High	GKFQDNFEF	19	2	2	Q15691;Q9UPY8		0	3.07935e+07	0	0.001889	54.38	0.000765983	2	1131.51	-0.372834	61.2125	0	C1203	37.04	B1503	18.8	B1503	0.5
High	DAARAIAGV	18	1	1	O75821		0	3.69387e+07	0	0.005205	54.12	0.0012036	2	843.468	-0.339222	41.6364	0	C1203	81.48	A6802	5.9	A6802	0.03
High	MVAPVWYLV	20	1	1	Q96HY6		0	2.76777e+07	0	0.001108	53.94	0.00139379	2	1077.58	-0.636545	101.779	0	C1203	48.15	A6802	2	A6802	0.01
High	VKGVSLSSY	14	1	1	Q9Y3B1		0	1.64816e+07	0	0.005293	53.7	0.00101249	2	939.514	-0.418881	43.2509	0	C1203	40.74	B1503	15.2	B1503	0.4
High	IKENPSSQY	11	1	1	O75496		0	1.25903e+07	0	0.0003276	53.66	0.00188678	2	1065.52	-0.206169	28.8108	0	C1203	37.04	B1503	107.2	B1503	2
High	TLADVLYHV	30	1	1	Q9UBL3		0	6.25049e+07	0	0.001884	53.51	0.00246091	2	1030.56	-0.93888	71.8766	0	C1203	44.44	A6802	5.7	A6802	0.03
High	FTADFVRQL	29	1	1	Q96Q15		0	5.58892e+07	0	0.00199	53.39	0.00165366	2	1096.58	-0.631822	67.3726	0	C1203	85.19	C1203	7.7	C1203	0.01
High	AKVDLNSNGF	5	1	1	P13797		0	2.42186e+07	0	0.0007533	53.35	0.00203609	2	1064.54	-0.10934	45.5693	0	C1203	37.14	B1503	137.4	B1503	2.5
High	SMGPVRVAF	24	1	1	P29279		0	5.85141e+07	0	0.0006588	53.25	0.00130732	2	963.508	0.182712	57.2538	0	C1203	40.74	B1503	8	B1503	0.15
High	DIATILSKV	14	1	1	Q8NG31		0	3.12412e+07	0	0.005477	53.04	0.0006776	2	959.577	-0.280753	78.6446	0	C1203	40.74	A6802	14.5	A6802	0.12
High	FKVSDEVGF	2	1	1	Q6VY07		0	9.32403e+06	0	0.0006093	52.98	0.00205227	2	1027.51	-0.0917628	61.1216	0	C1203	40.74	B1503	36.5	B1503	0.9
High	DQAEIRSLV	29	2	2	P09913;O14879		0	125433015	0	0.004951	52.98	0.00244198	2	1030.55	-1.08482	55.2936	0	C1203	44.44	A6802	234.1	A6802	1.4
High	AKFDGILGM	22	1	1	P07339		0	1.92386e+07	0	0.002324	52.73	0.00194854	2	951.496	-0.713525	67.086	0	C1203	48.15	B1503	19.2	B1503	0.5
High	AASALIRTL	8	1	1	Q13535		0	2.21661e+07	0	0.001596	52.57	0.00125583	2	915.562	-0.398758	51.8529	0	C1203	92.59	C1203	106.2	C1203	0.5
High	AKWNPTAGVAF	27	1	1	P19387		0	6.09279e+07	0	0.0008054	52.53	0.00239919	2	1161.61	-0.0268268	62.3599	0		0	B1503	59.9	B1503	1.3
High	RLYGPSSVSF	23	1	1	P50454		0	5.13783e+07	0	0.001676	52	0.00235631	2	1112.57	-0.208089	56.6977	0	C1203	42.86	B1503	5.4	B1503	0.06
High	AKYPHVEDY	47	1	1	P61289		0	1.33756e+08	0	0.0004344	51.99	0.00219384	2	1121.53	-0.371695	35.6631	0	C1203	55.56	B1503	8.3	B1503	0.15
High	AVANIVNSV	15	1	1	Q9BRQ8		0	3.46369e+07	0	0.005157	51.95	0.00242572	2	886.499	-0.741693	57.5969	0	C1203	48.15	A6802	16.4	A6802	0.15
High	FAYPAIRYL	59	1	1	P51398		0	2.13309e+08	0	0.002212	51.94	0.00149314	2	1113.61	-0.541657	73.0735	0	C1203	96.3	C1203	2.4	C1203	0.01
High	EVNSGIYRV	37	1	1	Q0VDF9		0	2.55016e+08	0	0.005675	51.75	0.00270345	2	1036.54	-0.646182	42.8409	0	C1203	44.44	A6802	9.6	A6802	0.07
High	DTAEIFHSA	44	1	1	Q92538		0	2.40241e+08	0	0.004981	51.59	0.00248489	2	990.452	-0.304026	48.2531	0	C1203	37.04	A6802	3.4	A6802	0.01
High	VTYNYPVHY	12	1	1	Q9NV96		0	33780172	0	0.002755	51.55	0.00194241	2	1155.55	-0.113169	53.3659	0	C1203	81.48	B1503	24.7	C1203	0.12
High	KKLPKGTVSF	11	1	1	O75534		0	1.41974e+07	0	0.0009767	51.47	0.000544976	2	1104.68	-0.398015	27.6108	0	C1203	34.29	B1503	16.6	B1503	0.4
High	DVAPVSFFL	10	1	1	O14791		0	9.50612e+06	0	0.002871	51.42	0.00300413	2	994.524	-0.122379	105.057	0	C1203	48.15	A6802	4.7	A6802	0.01
High	ETIPSEIQVFV	33	1	1	Q15646		0	2.23092e+08	0	0.0007941	51.41	0.0028535	2	1261.67	-0.0755372	90.7144	0		0	A6802	12.4	A6802	0.1
High	KAFQKIVVL	94	2	2	Q7L1Q6;Q9Y6E2		0	2.97075e+09	0	0.005004	51.39	0.000218195	2	1045.68	-1.12322	46.8382	0	C1203	88.89	C1203	36.9	C1203	0.17
High	VKVDLSEKY	6	1	1	P43243		0	1.41308e+07	0	0.001262	51.35	0.00227176	2	1080.59	-1.16468	39.3967	0	C1203	44.44	B1503	104.6	B1503	1.9
High	YKAAAGEDY	27	1	1	P23381		0	8.53154e+07	0	0.005136	51.29	0.00177507	2	987.441	-0.814932	29.4363	0	C1203	44.44	B1503	35.3	B1503	0.9
High	SAYAQIVQF	24	1	1	Q9Y4W6		0	5.96049e+07	0	0.002524	51.15	0.00315846	2	1026.53	0.0574696	75.2472	0	C1203	77.78	B1503	9	C1203	0.09
High	GKPPFEANTY	26	1	1	O14965		0	1.43657e+08	0	0.001942	51.1	0.00318339	2	1123.54	-0.519728	42.9687	0	C1203	31.43	B1503	372	B1503	4.5
High	TVIAKVNNV	28	1	1	P26639		0	7.70993e+07	0	0.005716	51.03	0.0024009	2	957.572	-0.509702	35.8695	0	C1203	40.74	A6802	11.7	A6802	0.09
High	TVAQIKATV	47	1	1	Q8IXM2		0	1.08836e+08	0	0.006194	50.97	0.00177483	2	930.561	-0.682856	39.4794	0	C1203	44.44	A6802	10.7	A6802	0.08
High	AQGPTPRYF	79	1	1	O60427		0	2.16366e+09	0	0.002588	50.97	0.00302977	2	1036.52	-0.752546	44.1123	0	C1203	48.15	B1503	8.2	B1503	0.15
High	SISDVIAQV	50	1	1	Q9HCJ1		0	3.64258e+08	0	0.004958	50.91	0.00344334	2	931.509	-0.745714	74.8802	0	C1203	48.15	A6802	10.4	A6802	0.08
High	KKFFGEFTGF	28	1	1	Q15029		0	7.99846e+07	0	0.0009471	50.78	0.00312766	2	1207.61	-0.210182	63.6559	0	C1203	42.86	B1503	16.3	B1503	0.4
High	YKLLGGLAV	53	1	1	P23396		0	2.6125e+08	0	0.004876	50.54	0.000745319	2	933.576	-0.775402	68.1115	0	C1203	44.44	B1503	53.1	B1503	1.2
High	GKLGFLASY	13	1	1	Q12772		0	1.93803e+07	0	0.003644	50.5	0.00314478	2	955.524	-0.334517	61.9688	0	C1203	40.74	B1503	11.9	B1503	0.3
High	VTTDIQVKV	56	1	1	O00267		0	4.44841e+08	0	0.003489	50.41	0.00203639	2	1002.58	-0.523852	49.6672	0	C1203	77.78	A6802	34.4	A6802	0.4
High	YASENVNKL	15	2	2	P62820;Q9H0U4		0	2.27051e+07	0	0.001101	50.29	0.00358822	2	1037.53	-0.882047	34.1299	0	C1203	88.89	C1203	14.1	C1203	0.04
High	SAVDFIRTL	38	1	1	Q9UEE5		0	3.20466e+08	0	0.005613	49.95	0.00322846	2	1021.57	-0.284747	72.4096	0	C1203	88.89	C1203	13.9	C1203	0.04
High	FVNDIFERI	268	14	14	P33778;P62807;P58876;Q93079;P06899;O60814;Q99880;Q99879;Q99877;P23527;Q16778;Q5QNW6;Q8N257;P57053		0	6.36527e+09	0	0.00171	49.93	0.00395067	2	1152.61	0.162039	76.9141	0	C1203	37.04	A6802	12	A6802	0.1
High	YAFPKAVSVF	29	1	1	O15427		0	1.48425e+08	0	0.0002422	49.89	0.00338824	2	1128.61	0.0735574	73.1026	0	C1203	77.14	B1503	5.9	C1203	0.04
High	KQTQIFTTY	14	2	2	P34931;P08107		0	3.15781e+07	0	0.001673	49.89	0.00440005	2	1129.59	0.0827613	47.3564	0	C1203	40.74	B1503	2.5	B1503	0.01
High	TTVEIFNKL	109	1	1	Q96QK1		0	2.03521e+09	0	0.002341	49.81	0.0025089	2	1064.6	-0.574151	62.8859	0	C1203	70.37	A6802	8.9	A6802	0.06
High	AKFSLPVSL	13	1	1	Q12980		0	1.74224e+07	0	0.002242	49.7	0.00230752	2	961.571	-0.42081	71.7261	0	C1203	55.56	B1503	15.7	B1503	0.4
High	AKVANASYY	14	1	1	O15042		0	1.64294e+07	0	0.001545	49.65	0.00440291	2	986.494	0.120623	31.6875	0	C1203	40.74	B1503	13.4	B1503	0.3
High	NAYSRILQA	15	1	1	O15230		0	5.46041e+07	0	0.002637	49.61	0.00420681	2	1035.56	-0.282334	47.9049	0	C1203	51.85	C1203	103	C1203	0.5
High	KAFDFPSSF	14	1	1	Q7L945		0	2.16571e+07	0	0.002101	49.24	0.00414493	2	1045.5	0.212154	68.8396	0	C1203	77.78	B1503	3.2	C1203	0.01
High	KQIFETIYY	21	1	1	P23921		0	4.41717e+07	0	0.001217	49.21	0.00512306	2	1204.62	-0.157653	65.8243	0	C1203	40.74	B1503	4.2	B1503	0.04
High	TTYEGIFKTL	35	1	1	Q8WWM7		0	1.31596e+08	0	0.0009636	49.16	0.00445556	2	1172.62	-0.210525	68.9578	0	C1203	54.29	A6802	55.7	A6802	0.5
High	EVAELFQRL	49	1	1	Q4V328		0	3.18402e+08	0	0.002401	49.01	0.00489475	2	1104.6	-0.493982	69.8516	0	C1203	44.44	A6802	15.7	A6802	0.15
High	YQADIERMY	28	1	1	O95573		0	8.246e+07	0	0.0002549	48.84	0.00308322	2	1188.53	-0.69649	53.4238	0	C1203	51.85	B1503	5.3	B1503	0.06
High	KASGTLREY	32	1	1	Q02543		0	3.4315e+08	0	0.001754	48.81	0.00424883	2	1024.54	-0.534605	22.2566	0	C1203	88.89	B1503	39.8	C1203	0.8
High	FAAFFSHIL	17	1	1	Q86XA9		0	2.55493e+07	0	0.001558	48.77	0.00349237	2	1052.56	-0.906156	83.2938	0	C1203	81.48	C1203	10.1	C1203	0.03
High	SAYDNVNKV	15	1	1	P28482		0	2.8179e+07	0	0.00207	48.74	0.00502359	2	1009.49	-0.0105542	33.6735	0	C1203	85.19	C1203	11.1	C1203	0.03
High	ETFKDFPQm	37	2	2	P15170;Q8IYD1	M9(Oxidation)	0	6.69813e+07	0	0.0007136	48.72	0.00284398	2	1158.51	-0.358311	48.2701	0	C1203	62.96	A6802	240.4	A6802	1.4
High	SKLQNNNVY	17	1	1	P63010		0	2.15406e+07	0	0.005309	48.71	0.00527712	2	1079.55	-0.678516	28.5035	0	C1203	40.74	B1503	16.3	B1503	0.4
High	TTVEDLGSKI	19	1	1	P35613		0	5.31221e+07	0	0.003948	48.66	0.00501692	2	1062.57	-0.559992	52.6379	0	C1203	31.43	A6802	91	A6802	0.7
High	FSYAFPKAV	3	2	2	O60669;O15427		0	7.99066e+06	0	0.001533	48.46	0.00527617	2	1029.54	-0.0976146	63.0001	0	C1203	81.48	C1203	3.4	C1203	0.01
High	KGSSAVRVY	18	1	1	P10914		0	5.70152e+07	0	0.001568	48.43	0.00422034	2	966.536	-0.643456	22.8287	0	C1203	55.56	B1503	38.4	B1503	0.9
High	DAANVMVYV	14	1	1	Q9Y4C1		0	3.36458e+07	0	0.005108	48.22	0.00629234	2	981.471	-0.482624	78.5072	0	C1203	81.48	A6802	3.8	A6802	0.01
High	EVLDFITHL	31	1	1	Q13057		0	3.24438e+08	0	0.001944	48.2	0.00646669	2	1086.58	-0.427183	86.8259	0	C1203	44.44	A6802	17.7	A6802	0.17
High	IAFPTSISV	23	1	1	Q9UQ80		0	3.42564e+08	0	0.004365	48.16	0.0049959	2	934.524	-0.968586	81.6019	0	C1203	88.89	C1203	10.8	C1203	0.03
High	LAFPGEMLL	17	1	1	P43007		0	3.10473e+07	0	0.006052	48.14	0.00698481	2	990.533	-0.355327	98.3215	0	C1203	85.19	C1203	18.4	C1203	0.07
High	TLIEDILGV	12	1	1	Q8TEL6		0	3.17843e+07	0	0.005319	48.06	0.00398603	2	972.561	-0.288532	103.49	0	C1203	48.15	A6802	119	A6802	0.9
High	EVAGILEPVGL	21	1	1	O95229		0	9.36146e+07	0	0.006114	47.98	0.00272347	2	1096.62	-0.775347	87.9834	0		0	A6802	41.9	A6802	0.4
High	DTFSGIGKKFGL	18	1	1	Q15847		0	4.22553e+07	0	0.001237	47.86	0.00509459	2	1269.68	0.523391	68.2931	0		0	A6802	198.2	A6802	1.2
High	VKTGTITTF	60	1	1	P13639		0	6.58233e+08	0	0.00213	47.71	0.0029617	2	967.546	-0.342593	44.1252	0	C1203	44.44	B1503	6.1	B1503	0.08
High	AKLPFTPLSY	12	1	1	Q9UM00		0	2.75744e+07	0	0.002138	47.66	0.00483507	2	1136.64	0.103934	71.6867	0	C1203	48.57	B1503	14.2	B1503	0.4
High	IQKAVSEGY	16	1	1	P32320		0	2.25862e+07	0	0.001015	47.55	0.00682778	2	994.52	-0.0492642	30.1854	0	C1203	37.04	B1503	9.4	B1503	0.17
High	ITAPPTPGI	12	1	1	Q8NEZ4		0	2.0702e+07	0	0.003332	47.35	0.00314956	2	866.498	-0.239887	60.1509	0	C1203	70.37	A6802	34.3	A6802	0.4
High	NVAEIVIHI	16	1	1	Q9BZD4		0	6.75089e+07	0	0.006098	47.34	0.00319464	2	1007.59	0.278269	71.0277	0	C1203	44.44	A6802	5.1	A6802	0.02
High	FSMYKPITY	20	1	1	Q68CL5		0	3.53791e+07	0	0.000933	47.3	0.0074409	2	1149.56	-0.365857	62.6979	0	C1203	81.48	C1203	5.1	C1203	0.01
High	SKLSFSQVF	13	1	1	Q9UJX4		0	2.96568e+07	0	0.00244	47.28	0.00709176	2	1042.56	-0.118052	63.8417	0	C1203	37.04	B1503	4.2	B1503	0.04
High	SIAGIFKEV	27	1	1	Q9NQQ7		0	7.56358e+07	0	0.003683	47.22	0.00559433	2	963.551	0.000678967	65.0524	0	C1203	51.85	A6802	19.4	A6802	0.17
High	TQmPDPKTF	8	1	1	Q9Y5V0	M3(Oxidation)	0	1.47245e+07	0	0.002894	47.14	0.00733568	2	1080.5	-0.656514	35.3095	0	C1203	48.15	B1503	4.4	B1503	0.04
High	TTFEHDIQAL	32	1	1	Q01082		0	2.20287e+08	0	0.003202	47.09	0.00791996	2	1174.57	-0.329799	58.8062	0	C1203	57.14	A6802	138.6	A6802	1
High	KAITFVTQY	26	1	1	Q9H0S4		0	5.62364e+07	0	0.003638	46.87	0.00666109	2	1070.59	-0.152324	53.9697	0	C1203	77.78	B1503	10	B1503	0.2
High	AKKISQLGY	22	1	1	P26196		0	2.7101e+07	0	0.001655	46.81	0.0036093	2	1007.59	0.167043	29.724	0	C1203	44.44	B1503	89.1	B1503	1.7
High	SVADVVRFI	5	1	1	Q9UHJ3		0	1.22945e+07	0	0.002672	46.72	0.0065153	2	1005.57	-0.252528	75.1285	0	C1203	44.44	A6802	12.3	A6802	0.1
High	SKLLANMVY	6	1	1	P28074		0	2.45894e+07	0	0.002261	46.71	0.00637354	2	1038.56	-0.506888	57.5985	0	C1203	40.74	B1503	8.3	B1503	0.15
High	RKFPAGKVPAF	78	1	1	P26641		0	3.44667e+08	0	0.0006484	46.7	0.00355971	3	1217.71	-0.738768	38.7551	0		0	B1503	24	B1503	0.6
High	LVSPITGEKI	15	1	1	Q15459		0	4.58023e+07	0	0.0006463	46.69	0.00403399	2	1056.63	0.0579025	55.2194	0	C1203	20	A6802	213.1	A6802	1.3
High	RKKPPMNSM	15	1	1	Q01844		0	3.28399e+07	0	0.001166	46.67	0.00997814	2	1088.57	-0.037849	19.1427	0	C1203	37.04	B1503	30.7	B1503	0.8
High	MKLLTGLVF	13	2	2	P0DJI8;P0DJI9		0	3.00059e+07	0	0.001743	46.64	0.00244517	2	1021.61	-0.670405	82.2285	0	C1203	37.04	B1503	3.7	B1503	0.03
High	RSSPPGHYY	28	1	1	Q9NX40		0	2.78933e+07	0	0.001205	46.64	0.00797715	2	1063.49	-0.850775	24.4408	0	C1203	77.78	B1503	28.9	C1203	0.5
High	VQGIFVEKY	11	3	3	P62834;P61224;A6NIZ1		0	3.09364e+07	0	0.00225	46.63	0.00673646	2	1082.59	-0.949179	54.7916	0	C1203	44.44	B1503	47.3	B1503	1.1
High	MKVLLAAAL	2	1	1	P23284		0	1.36494e+07	0	0.001322	46.58	0.00201983	2	929.585	-0.380599	66.7994	0	C1203	37.04	B1503	17.6	B1503	0.5
High	AQEDAQRLY	6	1	1	P20073		0	1.04932e+07	0	0.001532	46.58	0.00815516	2	1093.53	-0.699063	35.0366	0	C1203	48.15	B1503	24.7	B1503	0.6
High	KLFIGGLSF	5	4	4	Q32P51;P09651;P22626;P51991		0	2.29002e+07	0	0.004605	46.57	0.00354451	2	981.576	-0.685491	80.4147	0	C1203	37.04	B1503	3.8	B1503	0.03
High	SAMPTVRSF	48	1	1	Q03518		0	4.02404e+08	0	0.004311	46.52	0.00683795	2	995.498	0.1026	49.2345	0	C1203	81.48	B1503	6	C1203	0.02
High	QAFPLIIKL	22	1	1	Q14CZ7		0	4.75884e+07	0	0.004108	46.52	0.00175155	2	1042.67	-0.740955	82.5551	0	C1203	92.59	C1203	130.7	C1203	0.6
High	YAYDGKDYIA	31	16	16	P01892;P30447;P05534;P10316;P01889;P30460;Q04826;P30479;P30480;P30486;P18464;P30490;P30498;Q31610;P30499;P04222		0	1.88258e+08	0	0.006219	46.46	0.00698392	2	1178.54	-1.16205	50.4012	0	C1203	45.71	A6802	498.4	C1203	2
High	TVTSVLEYL	41	1	1	O14893		0	2.09602e+08	0	0.005106	46.27	0.00658573	2	1024.56	-0.0521473	90.792	0	C1203	40.74	A6802	19.5	A6802	0.17
High	LAKAWPTVL	26	1	1	P31040		0	3.88363e+07	0	0.005699	46.2	0.00438747	2	998.603	-0.551268	63.2482	0	C1203	81.48	C1203	35.2	C1203	0.15
High	KLYQSIIGY	17	1	1	Q9NSV4		0	3.78979e+07	0	0.005158	46.13	0.00700993	2	1084.6	-0.389282	59.9782	0	C1203	48.15	B1503	7.6	B1503	0.12
High	YAYDGKDYIAL	35	16	16	P01892;P30447;P05534;P10316;P01889;P30460;Q04826;P30479;P30480;P30486;P18464;P30490;P30498;Q31610;P30499;P04222		0	2.01818e+08	0	0.0005592	46.09	0.01063	2	1291.62	0.574564	65.6782	0		0	C1203	280.6	C1203	1.1
High	YKILGGSVL	20	1	1	Q15843		0	4.7264e+07	0	0.005513	46.05	0.00263212	2	949.571	-0.479873	61.6375	0	C1203	44.44	B1503	12.1	B1503	0.3
High	EAINIIQGI	7	1	1	Q9NR81		0	5.78658e+07	0	0.004688	46.01	0.00577408	2	970.556	-0.954642	80.1672	0	C1203	70.37	A6802	10.2	A6802	0.08
High	GQFGTINNF	12	1	1	Q14457		0	2.18125e+07	0	0.004493	45.91	0.00813583	2	997.474	0.113539	66.4537	0	C1203	40.74	B1503	3.6	B1503	0.03
High	MVVDIVQEL	24	1	1	O00764		0	9.28344e+08	0	0.001341	45.9	0.0102315	2	1045.56	0.458159	87.5429	0	C1203	48.15	A6802	12.4	C1203	0.06
High	KKFVTQQQY	5	1	1	Q9Y4E5		0	8.82439e+06	0	0.001805	45.82	0.00833891	2	1169.63	-0.492802	25.894	0	C1203	40.74	B1503	17.9	B1503	0.5
High	YAAPGGLIGV	29	2	2	Q2VIR3;P41091		0	6.67968e+07	0	0.004202	45.81	0.015517	2	917.509	-0.0659374	72.5075	0	C1203	62.86	A6802	31.8	A6802	0.3
High	DTVTQFDNV	11	1	1	Q8TAQ2		0	1.24519e+07	0	0.00172	45.79	0.00907425	2	1038.47	-0.418912	62.309	0	C1203	66.67	A6802	19.9	A6802	0.17
High	STFIGEHYV	23	1	1	P08581		0	6.29469e+07	0	0.00247	45.61	0.0117225	2	1052.5	-0.303248	53.6828	0	C1203	70.37	A6802	6	A6802	0.03
High	GKIQFGYVY	23	1	1	Q969M3		0	5.61907e+07	0	0.001866	45.53	0.0114114	2	1074.56	-0.856736	59.7224	0	C1203	40.74	B1503	8.1	B1503	0.15
High	MSSSVVVRL	18	1	1	A0JNW5		0	4.44323e+07	0	0.005504	45.51	0.0107879	2	977.545	-0.0346752	51.5083	0	C1203	81.48	A6802	26	C1203	0.17
High	EVYGSLPAFL	45	1	1	Q01650		0	6.3951e+08	0	0.002755	45.36	0.0103782	2	1095.57	-0.391054	93.1178	0	C1203	40	A6802	19	A6802	0.17
High	EVYPFGIVGM	7	1	1	O75534		0	3.31663e+07	0	0.005452	45.24	0.0113018	2	1111.55	0.0564122	96.2525	0	C1203	28.57	A6802	35.5	A6802	0.4
High	AIAPIIAAV	7	1	1	Q9BQ52		0	4.27737e+07	0	0.006036	45.17	0.00148395	2	838.54	0.217349	78.6112	0	C1203	55.56	A6802	14.5	A6802	0.12
High	AAAELIKEV	14	1	1	Q13425		0	1.11762e+07	0	0.00403	45.09	0.00979094	2	943.545	-0.631252	48.4039	0	C1203	96.3	C1203	115.6	C1203	0.6
High	RLYFSQQTY	15	1	1	P33897		0	5.93534e+07	0	0.003847	45.07	0.0128327	2	1205.59	-0.762745	51.1397	0	C1203	44.44	B1503	3.9	B1503	0.03
High	AKYESQTSF	19	1	1	Q9P0U4		0	2.21495e+07	0	0.004075	45.03	0.0098769	2	1060.49	-0.840512	33.9963	0	C1203	40.74	B1503	2.8	B1503	0.01
High	YQFTGIKKY	38	1	1	Q96IX5		0	2.33704e+08	0	0.001444	45.03	0.0130378	2	1147.61	-0.824529	41.8607	0	C1203	51.85	B1503	2.6	B1503	0.01
High	RMNPNSPSITY	3	1	1	P84090		0	22176935	0	0.0004476	45.03	0.00984078	2	1279.61	-0.444433	45.9075	0		0	B1503	22.1	B1503	0.6
High	HQQPPSQQY	28	1	1	Q15532		0	4.18361e+07	0	0.001026	45.01	0.00862578	2	1112.51	0.0442147	26.1485	0	C1203	44.44	B1503	6.9	B1503	0.12
High	DVAEVLWEI	9	1	1	Q9Y5L0		0	1.39374e+07	0	0.001911	44.97	0.012982	2	1073.55	-0.0877182	105.05	0	C1203	40.74	A6802	6.8	A6802	0.04
High	AQKPFGATY	17	1	1	Q96QD5		0	4.67908e+07	0	0.002306	44.96	0.0127566	2	982.499	-0.0999425	37.8355	0	C1203	51.85	B1503	2.7	B1503	0.01
High	RQQQSQTAY	15	2	2	Q99613;B5ME19		0	1.18952e+07	0	0.0005906	44.94	0.0118504	2	1109.53	-0.382789	19.3642	0	C1203	37.04	B1503	3.1	B1503	0.01
High	VKVDELSLY	7	1	1	Q9BUR5		0	9.65938e+06	0	0.002223	44.9	0.00778243	2	1065.58	-0.803872	62.3138	0	C1203	44.44	B1503	22.8	B1503	0.6
High	EVFAWNNEV	25	1	1	P49419		0	59286643	0	0.004942	44.82	0.0102064	2	1107.51	-0.160472	76.5083	0	C1203	44.44	A6802	3.2	A6802	0.01
High	SQFGTVTRF	38	1	1	Q9BYG3		0	5.19402e+08	0	0.002114	44.7	0.0123085	2	1042.53	-0.583044	50.373	0	C1203	40.74	B1503	2.5	B1503	0.01
High	KKVGIVGKY	11	1	1	P61513		0	3.02458e+07	0	0.003945	44.47	0.00105574	2	991.629	-1.16027	22.8783	0	C1203	44.44	B1503	46.2	B1503	1.1
High	GKLPAGGVLY	21	1	1	P48634		0	5.19275e+07	0	0.003337	44.42	0.011341	2	974.566	-0.80199	50.8147	0	C1203	34.29	B1503	41.8	B1503	1
High	GVVDIFQTV	28	2	2	P23468;Q13332		0	1.47553e+08	0	0.004616	44.41	0.0170834	2	977.53	-0.323749	86.6414	0	C1203	44.44	A6802	54.5	A6802	0.5
High	EVFDKTYQF	28	1	1	Q96EU6		0	2.09768e+08	0	0.005469	44.34	0.0126452	2	1176.56	-0.436083	60.4004	0	C1203	37.04	A6802	307.5	A6802	1.6
High	EVSNIVKEAI	27	1	1	P63172		0	9.83267e+07	0	0.005782	44.3	0.0131672	2	1101.62	0.0804305	55.14	0	C1203	11.43	A6802	49.7	A6802	0.5
High	KQFRPPMGGY	25	1	1	Q9UKK9		0	5.72725e+07	0	0.004321	44.19	0.0145396	2	1180.59	-0.554302	39.6774	0	C1203	42.86	B1503	10.3	B1503	0.25
High	GKFPSLLTH	52	1	1	P62906		0	7.60464e+08	0	0.004327	44.15	0.0115358	2	999.561	-0.904801	47.5072	0	C1203	18.52	B1503	112.8	B1503	2
High	SKKIDRHmY	22	1	1	P84098	M8(Oxidation)	0	3.35835e+07	0	0.001977	44.15	0.0141587	2	1193.61	-0.759146	17.0568	0	C1203	37.04	B1503	311.3	B1503	4
High	SALEVVRKY	5	1	1	Q92797		0	1.6197e+07	0	0.001649	43.99	0.00873665	2	1064.61	-1.26168	38.2909	0	C1203	85.19	B1503	104.7	C1203	0.6
High	ETIMNQEKL	29	1	1	P20290		0	1.52838e+08	0	0.002509	43.99	0.0187282	2	1105.56	-0.117261	43.2799	0	C1203	66.67	A6802	227	A6802	1.4
High	DTFVHVTDL	29	1	1	P62263		0	5.68174e+07	0	0.003968	43.96	0.0199831	2	1046.51	-0.499939	66.0094	0	C1203	74.07	A6802	288.5	A6802	1.6
High	GKIADRFLLY	1	1	1	P61968		0	1.04104e+07	0	0.002238	43.94	0.00760266	2	1195.68	0.592406	59.4063	0	C1203	31.43	B1503	44.7	B1503	1.1
High	NTTDIFQTV	119	1	1	P37802		0	4.47059e+09	0	0.0057	43.93	0.0160738	2	1038.51	-0.304288	71.2404	0	C1203	74.07	A6802	4	A6802	0.01
High	NVIDNPWGV	9	1	1	Q5TGY1		0	1.85213e+07	0	0.004597	43.82	0.0153616	2	1013.5	-0.67012	78.9047	0	C1203	44.44	A6802	7.4	A6802	0.05
High	STSDLYNFQV	20	1	1	P10914		0	8.59489e+07	0	0.00301	43.76	0.0137746	2	1173.54	-0.717372	76.15	0	C1203	45.71	A6802	9.9	A6802	0.07
High	SVFTFVAEV	15	1	1	Q7Z429		0	7.60295e+07	0	0.004601	43.72	0.0141653	2	998.519	-0.281149	90.5641	0	C1203	48.15	A6802	6.7	A6802	0.04
High	KKHSQFIGY	46	4	4	Q58FF7;Q58FG0;P07900;P08238		0	4.23333e+08	0	0.002966	43.71	0.0137553	2	1107.59	-1.58927	26.5906	0	C1203	44.44	B1503	11.3	B1503	0.25
High	KSKDFVQVm	18	1	1	P78527	M9(Oxidation)	0	1.83738e+07	0	0.0004906	43.69	0.0153752	2	1097.57	-0.713538	27.9686	0	C1203	70.37	B1503	67.8	C1203	0.4
High	YAIDNPLHY	16	1	1	A5YKK6		0	2.27508e+07	0	0.001232	43.65	0.0161863	2	1105.53	-0.224184	61.8683	0	C1203	88.89	C1203	10.7	C1203	0.03
High	QKYAGKDGY	15	1	1	P31949		0	9.35963e+06	0	0.002651	43.38	0.0165472	2	1029.5	-0.320459	20.6243	0	C1203	40.74	B1503	78.4	B1503	1.6
High	STSDIITRI	83	2	2	P49585;Q9Y5K3		0	2789735533	0	0.005574	43.34	0.014587	2	1005.56	-0.180685	53.0687	0	C1203	70.37	A6802	16.4	A6802	0.15
High	LSAPIHTQM	29	1	1	Q8NG31		0	1.2348e+08	0	0.003918	43.31	0.0146041	2	997.513	-0.70808	46.192	0	C1203	70.37	C1203	22	C1203	0.09
High	STYIKKIGY	12	2	2	P68104;Q5VTE0		0	2.52602e+07	0	0.002517	43.28	0.0197614	2	1072.6	-0.166022	37.4465	0	C1203	74.07	B1503	514.4	C1203	2
High	DTFFRPLNV	32	1	1	Q13444		0	8.49952e+07	0	0.002763	43.26	0.0175938	2	1108.58	-0.624983	73.9807	0	C1203	77.78	A6802	19.7	A6802	0.17
High	RQKDVKDGKY	15	1	1	P62269		0	7.84445e+06	0	0.003509	43.17	0.0144199	3	1236.67	0.023059	16.2584	0	C1203	34.29	B1503	113.7	B1503	2
High	EIIDFFLGA	55	1	1	P15880		0	3.3708e+08	0	0.004268	43.05	0.0163201	2	1024.53	-0.546466	104.684	0	C1203	7.41	A6802	8.1	A6802	0.05
High	AKYPEIKSL	8	1	1	O15121		0	1.50663e+08	0	0.005237	43.03	0.0119606	2	1048.6	-1.00378	41.0297	0	C1203	59.26	B1503	83	B1503	1.7
High	SAISSVRLY	24	1	1	P42285		0	3.95428e+07	0	0.004767	43	0.013522	2	995.552	-0.246987	54.4071	0	C1203	85.19	B1503	19.6	C1203	0.09
High	VAAPQVQQV	22	1	1	Q12772		0	5.85205e+07	0	0.005336	42.88	0.0136793	2	939.525	-0.634556	46.8354	0	C1203	92.59	C1203	74	C1203	0.4
High	ISAPLVKTL	27	1	1	P30305		0	7.93058e+07	0	0.005495	42.87	0.00633901	2	941.603	0.100549	55.3731	0	C1203	88.89	C1203	53.8	C1203	0.25
High	MTSEIHNTV	50	1	1	O43264		0	5.77153e+08	0	0.005829	42.86	0.0165531	2	1031.48	-0.777695	32.8777	0	C1203	77.78	A6802	2.4	A6802	0.01
High	YSYFSPRTM	10	1	1	Q15003		0	1.47346e+07	0	0.003934	42.84	0.0139255	2	1151.52	-0.478572	54.5752	0	C1203	77.78	C1203	3.6	C1203	0.01
High	MTTKLISEL	19	1	1	Q5UIP0		0	1.36978e+08	0	0.005022	42.61	0.011204	2	1035.58	-0.259169	58.9117	0	C1203	74.07	A6802	25.4	A6802	0.25
High	GKVKSGGTY	14	1	1	P55017		0	4.0653e+07	0	0.005764	42.58	0.0182682	2	896.483	-0.490142	16.3653	0	C1203	40.74	B1503	21.1	B1503	0.6
High	SVVELVNKL	25	1	1	Q9BQE5		0	4.30746e+07	0	0.00419	42.53	0.0119541	2	1000.6	-0.146952	63.6511	0	C1203	44.44	A6802	155.9	A6802	1.1
High	SSYLFIVKY	14	1	1	Q96QD8		0	4.26187e+07	0	0.001151	42.52	0.0204843	2	1119.61	-0.367517	72.6084	0	C1203	77.78	B1503	81	C1203	1
High	NATAVVRHM	4	2	2	Q14012;Q8IU85		0	3.43526e+06	0	0.002639	42.51	0.0187166	2	998.519	-0.788795	25.6587	0	C1203	74.07	C1203	549.9	C1203	1.8
High	AKLKKFIAY	18	1	1	P33992		0	3.40264e+07	0	0.0009332	42.48	0.00313822	2	1081.68	-0.286619	34.0934	0	C1203	44.44	B1503	11.3	B1503	0.25
High	EVFRIGNVEI	23	1	1	P15927		0	3.61092e+07	0	0.001273	42.48	0.0218122	2	1175.64	-0.0578391	77.6328	0	C1203	20	A6802	27.3	A6802	0.25
High	KKNPSSPLY	15	1	1	O95478		0	1.31484e+07	0	0.004182	42.47	0.0228562	2	1033.57	-0.380197	24.307	0	C1203	44.44	B1503	9.4	B1503	0.17
High	ASYPELRLF	31	1	1	O75718		0	5.80183e+07	0	0.0009963	42.4	0.020641	2	1095.58	0.0550594	74.3614	0	C1203	77.78	B1503	26.2	C1203	0.4
High	AKNPSWASITY	6	2	2	Q8N6H7;Q9NP61		0	9.18911e+06	0	0.0003618	42.35	0.0231939	2	1237.62	0.247458	58.4206	0		0	B1503	110.4	B1503	2
High	YSFGHPSSV	34	1	1	P31327		0	1.17468e+08	0	0.006254	42.26	0.0176594	2	980.447	0.0733581	42.9501	0	C1203	81.48	C1203	2.9	C1203	0.01
High	GKVGSQSSF	9	1	1	Q9BY84		0	5.49084e+06	0	0.004423	42.25	0.0207022	2	896.447	-0.0101639	24.6685	0	C1203	33.33	B1503	14.6	B1503	0.4
High	DVSKIFQVV	28	1	1	Q5TF58		0	1.01714e+08	0	0.006209	42.19	0.0174571	2	1034.59	-0.412934	75.4211	0	C1203	44.44	A6802	44.3	A6802	0.4
High	GKVTSIMQF	5	1	1	Q14562		0	2.74307e+07	0	0.00389	42.08	0.0210455	2	1010.53	0.36422	57.9584	0	C1203	33.33	B1503	13.5	B1503	0.3
High	FAISILQQI	29	1	1	P60842		0	8.72427e+07	0	0.002863	41.98	0.0136567	2	1032.61	-0.156035	95.5391	0	C1203	74.07	C1203	8.3	C1203	0.01
High	RHWGGQADF	8	1	1	Q6PJG6		0	2.02834e+07	0	0.002183	41.8	0.0166131	2	1073.49	-0.401536	34.6854	0	C1203	33.33	B1503	56.4	B1503	1.3
High	EAAAVFKTL	44	1	1	Q8IWZ6		0	146428908	0	0.001683	41.76	0.0217312	2	949.535	0.0270177	52.8933	0	C1203	85.19	A6802	38.7	A6802	0.4
High	FVEWIPNNV	22	8	8	Q9H4B7;Q13885;Q9BVA1;Q13509;P04350;P68371;P07437;Q9BUF5		0	1.00714e+08	0	0.005511	41.72	0.0278848	2	1117.57	-0.91566	83.4678	0	C1203	44.44	A6802	43.9	A6802	0.4
High	GKVGFQSFF	16	1	1	P60903		0	1.73423e+07	0	0.003847	41.65	0.0247234	2	1016.52	-0.635066	68.5454	0	C1203	33.33	B1503	24.8	B1503	0.6
High	RKKQSDVMRF	19	1	1	P61313		0	4.34976e+07	0	0.001407	41.51	0.0211719	3	1294.7	-0.111775	22.6084	0	C1203	28.57	B1503	101.3	B1503	1.9
High	EVLDILTRL	21	1	1	O75955		0	3.96071e+07	0	0.005275	41.48	0.0141887	2	1071.64	-1.11536	84.7129	0	C1203	40.74	A6802	40.6	A6802	0.4
High	KQTQTFTTY	19	3	3	P54652;P17066;P11142		0	3.48711e+07	0	0.002641	41.37	0.0330007	2	1117.55	-0.450823	36.6484	0	C1203	40.74	B1503	2.2	B1503	0.01
High	SSVPGVRLL	11	1	1	P08670		0	2.27855e+07	0	0.002044	41.33	0.0153315	2	927.562	0.132814	56.5903	0	C1203	81.48	C1203	48.5	C1203	0.25
High	RAIDFSPYL	31	1	1	P17676		0	7.60435e+07	0	0.0008084	41.31	0.0282825	2	1081.57	-0.485434	69.9609	0	C1203	77.78	C1203	21.2	C1203	0.08
High	FTITPPTAQV	40	1	1	P52907		0	1.06766e+08	0	0.002519	41.27	0.0384533	2	1074.58	-0.545552	72.7377	0	C1203	51.43	A6802	7.3	A6802	0.05
High	RKNPVQEQTY	4	1	1	Q8N9N2		0	7.72918e+06	0	0.00286	41.27	0.0319331	2	1262.65	-0.355025	25.324	0	C1203	34.29	B1503	74.8	B1503	1.5
High	AMASIINRL	23	1	1	Q96N67		0	4.45473e+07	0	0.003821	41.2	0.0197154	2	988.56	-0.650479	59.552	0	C1203	51.85	B1503	126.7	C1203	1.8
High	FSWEGAFQHV	16	1	1	P26641		0	3.28864e+07	0	0.001165	41.19	0.0235435	2	1207.55	0.519427	74.9777	0	C1203	60	A6802	55.8	A6802	0.5
High	MASRVLAAL	4	1	1	Q8N511		0	1.46135e+07	0	0.002945	41.17	0.0162735	2	931.539	0.00426663	53.5026	0	C1203	77.78	C1203	13.1	C1203	0.04
High	YVTDVLYRV	24	1	1	Q96Q15		0	1.15963e+08	0	0.002633	41.05	0.0262779	2	1127.61	-0.231261	65.6684	0	C1203	44.44	A6802	5	A6802	0.02
High	KKGPSGYGF	32	1	1	O14745		0	1.05701e+08	0	0.003961	41.04	0.0304626	2	940.488	-0.622609	28.436	0	C1203	37.04	B1503	50.9	B1503	1.2
High	RKIPVPANRY	38	1	1	Q9NRX1		0	6.76691e+07	0	0.002584	41.02	0.0144338	3	1213.72	-0.41631	28.4417	0	C1203	31.43	B1503	52	B1503	1.2
High	GKLKQFDAY	22	1	1	Q9Y282		0	6.33861e+07	0	0.004572	40.91	0.0300218	2	1069.57	-0.37675	34.3216	0	C1203	37.04	B1503	45.3	B1503	1.1
High	KAYHEQLSV	27	6	6	Q71U36;P68363;Q13748;Q6PEY2;P68366;Q9NY65		0	9.41408e+07	0	0.005369	40.75	0.0392763	2	1074.56	-0.750882	30.7865	0	C1203	81.48	C1203	48.2	C1203	0.25
High	DTTYINHVV	50	1	1	Q9UBR2		0	1.06118e+09	0	0.004975	40.63	0.042751	2	1061.53	-0.96768	50.871	0	C1203	70.37	A6802	8.7	A6802	0.06
High	KKTGKTVSY	5	1	1	O00244		0	1.16895e+07	0	0.003739	40.56	0.0148862	2	1011.58	-1.07687	16.9328	0	C1203	44.44	B1503	19.2	B1503	0.5
High	FGFPGERTY	36	1	1	Q9Y4K0		0	2.18224e+08	0	0.001489	40.51	0.024373	2	1073.5	-0.395927	56.4357	0	C1203	59.26	B1503	10.2	C1203	0.04
High	HVVDFFNRV	41	1	1	Q96BX8		0	156436387	0	0.002814	40.51	0.0403164	2	1132.59	-0.0724195	56.1142	0	C1203	40.74	A6802	4.3	A6802	0.01
High	EVAALIRSL	22	1	1	Q6P2Q9		0	1.0983e+08	0	0.003885	40.46	0.0220422	2	971.588	-0.224272	65.3157	0	C1203	48.15	A6802	24.8	A6802	0.25
High	ETISPSGQGV	21	1	1	P23610		0	8.28022e+07	0	0.005206	40.45	0.0369329	2	974.479	-0.283234	43.5851	0	C1203	51.43	A6802	6.4	A6802	0.04
High	RQAPTGLGL	29	1	1	Q9BX59		0	3.86592e+07	0	0.002825	40.42	0.0137489	2	912.525	-0.75838	41.996	0	C1203	51.85	B1503	6.2	B1503	0.09
High	RLWEQLVHF	26	1	1	Q5JS54		0	8.44767e+07	0	0.0007728	40.39	0.0266693	2	1227.66	-0.47568	70.5413	0	C1203	37.04	B1503	12.6	B1503	0.3
High	IKDNVVIVY	16	1	1	Q9Y2T2		0	3.79748e+07	0	0.004928	40.38	0.0176327	2	1062.62	-0.0950537	55.4496	0	C1203	48.15	B1503	44.4	B1503	1.1
High	KQMEQISQF	9	2	2	P37802;Q9UI15		0	1.44671e+08	0	0.001033	40.33	0.0327912	2	1138.56	-0.0820582	44.5238	0	C1203	37.04	B1503	2.3	B1503	0.01
High	KQIESKTAF	18	1	1	P10599		0	3.48404e+07	0	0.001571	40.24	0.0270718	2	1051.58	0.128796	24.4577	0	C1203	33.33	B1503	2.3	B1503	0.01
High	IAFEFPVLV	10	1	1	Q8TDN4		0	8.37677e+06	0	0.002949	40.2	0.0244717	2	1034.59	-0.178579	104.893	0	C1203	88.89	C1203	10.1	C1203	0.03
High	KAYGASKTF	10	1	1	P27694		0	1.18296e+07	0	0.004869	40.13	0.0477442	2	972.515	-0.440476	23.1105	0	C1203	81.48	B1503	4.7	B1503	0.05
High	ITVSIIKEL	34	1	1	Q8TED0		0	1.58775e+08	0	0.004438	40.13	0.00581821	2	1015.64	-0.303621	68.976	0	C1203	81.48	C1203	140.7	C1203	0.7
High	ETIIDTKGV	28	1	1	Q9GZS1		0	4.98616e+07	0	0.004664	40	0.028205	2	975.535	-0.498615	44.8791	0	C1203	70.37	A6802	10.4	A6802	0.08
High	AKVVDKSEY	18	1	1	P42695		0	2.25439e+07	0	0.002984	39.98	0.0287521	2	1038.55	-0.786999	22.4193	0	C1203	44.44	B1503	98.5	B1503	1.8
High	HAAGVLLHV	32	1	1	Q6UX98		0	8.29692e+07	0	0.003051	39.94	0.0285517	2	916.535	-1.11876	38.8462	0	C1203	85.19	A6802	6.7	A6802	0.04
High	EVSPVSFHQV	65	1	1	Q8N543		0	1.02571e+09	0	0.004989	39.94	0.0391268	2	1128.57	-0.246744	51.4393	0	C1203	25.71	A6802	5.5	A6802	0.03
High	KTPDFILQV	18	1	1	Q9Y2V0		0	5.80001e+07	0	0.003616	39.91	0.0371418	2	1060.6	-0.0810915	68.9329	0	C1203	77.78	A6802	174.3	C1203	0.9
High	ETLFPSKIGV	20	2	2	Q9H8S9;Q7L9L4		0	1.23601e+08	0	0.003808	39.89	0.0322824	2	1090.61	0.0790211	65.6771	0	C1203	45.71	A6802	6.4	A6802	0.04
High	QLVDIIEKV	25	1	1	P61289		0	7.93947e+07	0	0.004953	39.77	0.0195431	2	1056.63	-1.21291	70.3965	0	C1203	44.44	A6802	145.4	A6802	1
High	KKVVKETSY	10	1	1	Q9NZJ7		0	5.26291e+06	0	0.00392	39.76	0.0170676	2	1081.62	-0.386309	18.0361	0	C1203	37.04	B1503	31.5	B1503	0.8
High	NAFSGVMmL	17	1	1	Q9NTX5	M8(Oxidation)	0	4.00546e+07	0	0.006255	39.75	0.0252738	2	985.448	-0.235111	79.3309	0	C1203	85.19	C1203	22.4	C1203	0.09
High	YMIDPSGVSY	16	1	1	P25788		0	8.44564e+07	0	0.001437	39.74	0.0212021	2	1131.5	0.118352	72.2052	0	C1203	48.57	B1503	5	B1503	0.05
High	FKFMPPPTY	60	1	1	Q9H3M7		0	1.18824e+08	0	0.000603	39.72	0.0352243	2	1127.56	-0.294149	65.0625	0	C1203	51.85	B1503	3.4	B1503	0.02
High	GKAPLNVQF	20	1	1	O75369		0	4.12462e+07	0	0.005736	39.58	0.044706	2	973.547	0.0268328	52.9612	0	C1203	44.44	B1503	34.9	B1503	0.9
High	KLFLTGESY	12	1	1	P10619		0	1.11443e+07	0	0.002447	39.56	0.0390251	2	1057.56	-0.0257356	56.3934	0	C1203	40.74	B1503	6.4	B1503	0.09
High	NVVDVFHAV	10	1	1	Q15262		0	7.40168e+07	0	0.006247	39.53	0.0409726	2	999.526	-0.169016	65.1682	0	C1203	40.74	A6802	2.5	A6802	0.01
High	SAFPFPVTV	7	1	1	Q96K37		0	8.9496e+07	0	0.004432	39.48	0.0543535	2	964.513	-0.557833	92.2953	0	C1203	96.3	C1203	5.4	C1203	0.01
High	ISTPVIRTF	4	1	1	Q9NZB2		0	1.08485e+08	0	0.006032	39.47	0.0234037	2	1033.6	-0.874888	59.0357	0	C1203	77.78	B1503	37.8	C1203	0.25
High	YNFEKPVVM	18	1	1	O43929		0	2.92943e+07	0	0.001992	39.37	0.0432906	2	1126.56	0.0328103	59.0985	0	C1203	51.85	B1503	28	C1203	0.15
High	TTIEAIHGL	52	1	1	Q92905		0	2.36971e+08	0	0.00554	39.32	0.0317753	2	954.525	-0.268387	52.9765	0	C1203	74.07	A6802	4.6	A6802	0.01
High	NTATIFHEL	56	1	1	Q9UHD2		0	1.006e+09	0	0.004829	39.31	0.0601688	2	1045.53	-0.256178	58.3975	0	C1203	74.07	A6802	3.8	A6802	0.01
High	GQYNKEDPTSF	7	1	1	Q15437		0	3.83164e+07	0	0.0004054	39.31	0.0248095	2	1285.57	-0.233231	41.2223	0		0	B1503	24.5	B1503	0.6
High	DVIDFTGHAL	1	2	2	P31150;P50395		0	1.5201e+07	0	0.002308	39.25	0.0492396	2	1087.54	0.464071	72.2669	0	C1203	40	A6802	32.3	A6802	0.3
High	GQYSTGKTTF	19	3	3	Q9H4M9;Q9NZN3;Q9H223		0	2.52375e+07	0	0.005397	39.21	0.0486277	2	1089.52	-0.537749	34.2257	0	C1203	31.43	B1503	4.1	B1503	0.03
High	YLYGQTTTY	15	1	1	P11388		0	3.47259e+07	0	0.005692	39.01	0.0405698	2	1109.51	-0.239081	57.2918	0	C1203	51.85	B1503	3	B1503	0.01
High	GKLSEGVTISY	5	1	1	P05556		0	1.08435e+07	0	0.003771	38.96	0.0517314	2	1153.61	-0.898903	53.0445	0		0	B1503	446.1	B1503	4.5
High	RKFDAIYKY	16	1	1	Q5C9Z4		0	1.96244e+07	0	0.001079	38.93	0.0554676	3	1203.65	-0.0744473	37.2018	0	C1203	48.15	B1503	13	B1503	0.3
High	KHQEHILRF	35	1	1	Q13263		0	9.33394e+07	0	0.005324	38.88	0.0343868	3	1207.67	-0.423821	26.2198	0	C1203	40.74	B1503	53.8	B1503	1.2
High	LQRLENTQY	9	1	1	Q96D70		0	1.76275e+07	0	0.004772	38.86	0.0563493	2	1164.6	-1.07882	38.3337	0	C1203	37.04	B1503	6.6	B1503	0.1
High	YKVEYPIMY	19	1	1	O14880		0	3.06833e+07	0	0.001477	38.77	0.0507596	2	1205.59	-0.319726	66.3296	0	C1203	51.85	B1503	7.7	B1503	0.12
High	RVFPYSVFY	47	1	1	O15118		0	247506949	0	0.002479	38.75	0.0601018	2	1177.6	-0.0253014	75.8012	0	C1203	51.85	B1503	7.9	C1203	0.09
High	GKFGGDFLVY	32	1	1	Q9BSV6		0	1.33162e+08	0	0.005719	38.69	0.0531567	2	1102.56	-0.342129	70.1069	0	C1203	54.29	B1503	9.5	B1503	0.2
High	KKYGVDLIRY	4	1	1	Q6UXN9		0	13964063	0	0.005652	38.65	0.0258452	3	1254.72	-0.314312	43.9102	0	C1203	34.29	B1503	23.2	B1503	0.6
High	RKLFIGGLSF	26	4	4	Q32P51;P09651;P22626;P51991		0	8.5442e+07	0	0.006091	38.64	0.0130276	2	1137.68	0.0657606	67.0922	0	C1203	37.14	B1503	6	B1503	0.08
High	TTTEITHHGT	26	1	1	P15924		0	6.54617e+07	0	0.006099	38.55	0.0433852	2	1097.52	-0.609852	19.1381	0	C1203	20	A6802	193.4	A6802	1.2
High	RVYPQAVYF	30	1	1	Q9Y4A5		0	1.61681e+08	0	0.002263	38.43	0.0404952	2	1142.6	-0.355985	59.5498	0	C1203	44.44	B1503	7.1	C1203	0.09
High	GHYLGEFSITY	20	1	1	P62841		0	4.55357e+07	0	0.002519	38.43	0.0477946	2	1286.61	0.529501	71.6342	0		0	B1503	127.4	B1503	2.5
High	YTYGQGTYGA	8	1	1	Q92841		0	2.07502e+07	0	0.004209	38.41	0.02616	2	1080.46	0.369606	47.8463	0	C1203	25.71	A6802	9.4	A6802	0.07
High	SKYFERHGY	8	1	1	O95786		0	3.52734e+07	0	0.002955	38.39	0.0433762	2	1186.56	-0.916505	26.3187	0	C1203	40.74	B1503	21.9	B1503	0.6
High	EAAPGALGQV	9	1	1	Q8WYQ5		0	2.51632e+07	0	0.004094	38.37	0.0504972	2	912.478	-0.354257	51.7023	0	C1203	60	A6802	25	A6802	0.25
High	GKRKSDTEF	8	1	1	O94782		0	5.44908e+06	0	0.005846	38.36	0.0523714	2	1067.55	-0.256859	17.4036	0	C1203	33.33	B1503	41.9	B1503	1
High	FGFHKPKMY	27	1	1	Q9NP50		0	1.49907e+08	0	0.001252	38.36	0.0518754	2	1154.58	-1.16363	38.6008	0	C1203	51.85	C1203	38.2	C1203	0.17
High	TSAAIYHVL	13	1	1	P46977		0	3.14986e+07	0	0.00322	38.31	0.0827945	2	974.53	-0.204435	53.7403	0	C1203	74.07	A6802	38.2	A6802	0.4
High	AQIKFLNTY	15	1	1	Q8ND90		0	1.48001e+07	0	0.002778	38.25	0.0464806	2	1097.6	0.152508	59.009	0	C1203	44.44	B1503	2.9	B1503	0.01
High	TTFDHQNSENV	26	1	1	Q9Y2D8		0	5.16006e+07	0	0.0007922	38.25	0.0199673	2	1291.55	0.00614714	33.5642	0		0	A6802	128.5	A6802	0.9
High	FVNDIFERIA	11	14	14	P33778;P62807;P58876;Q93079;P06899;O60814;Q99880;Q99879;Q99877;P23527;Q16778;Q5QNW6;Q8N257;P57053		0	2.49605e+07	0	0.001352	38.23	0.0558643	2	1223.64	0.443229	75.3482	0	C1203	14.29	A6802	212.5	A6802	1.3
High	GKLHPSSSL	9	1	1	A5PLN9		0	1.55336e+07	0	0.005045	38.18	0.0451527	2	925.51	-0.672297	23.1536	0	C1203	37.04	B1503	84	B1503	1.7
High	MAAAWPLLL	14	1	1	P15151		0	8.66444e+07	0	0.004831	38.11	0.0474316	2	985.554	-0.0605327	102.494	0	C1203	85.19	C1203	7.1	C1203	0.01
High	RKKPTTEGF	17	1	1	Q03111		0	2.71204e+07	0	0.004092	38.07	0.0494612	2	1063.59	-0.340708	19.6696	0	C1203	37.04	B1503	39.5	B1503	1
High	GQYSTGKTSF	20	1	1	Q9NZN4		0	50868821	0	0.006269	37.99	0.0593719	2	1075.5	-0.635013	33.826	0	C1203	34.29	B1503	3.8	B1503	0.03
High	SAYARLIDY	4	1	1	P34897		0	2.06307e+07	0	0.002473	37.98	0.0639988	2	1071.55	-0.150037	57.7225	0	C1203	81.48	B1503	12.7	C1203	0.05
High	SKMDPTDAKY	1	1	1	Q16543		0	2.85081e+06	0	0.0009996	37.96	0.0500262	2	1155.53	-0.545092	29.671	0	C1203	42.86	B1503	45	B1503	1.1
High	RQQPPSTTTF	14	1	1	A3KN83		0	3.8203e+07	0	0.001728	37.92	0.0666811	2	1162.58	-0.647794	34.8615	0	C1203	37.14	B1503	4.8	B1503	0.05
High	TTYDLTHTL	16	1	1	Q9NTJ5		0	5.51304e+07	0	0.005378	37.91	0.0819315	2	1064.53	-0.41622	55.9538	0	C1203	77.78	A6802	10.1	C1203	0.04
High	TTADPFVKV	24	1	1	Q8IV01		0	4.56061e+07	0	0.00572	37.9	0.0785199	2	977.53	-0.0115586	49.9032	0	C1203	77.78	A6802	3.5	A6802	0.01
High	EVFPLAMNYL	21	3	3	P24385;P30279;P30281		0	5.11103e+07	0	0.006086	37.9	0.0627154	2	1196.6	-0.581097	100.193	0	C1203	40	A6802	11.2	A6802	0.09
High	HKIDKSHEF	8	1	1	Q9NWV8		0	4.77826e+06	0	0.001048	37.89	0.0536187	2	1140.58	-0.243734	19.0908	0	C1203	37.04	B1503	24	B1503	0.6
High	RAYQQSEAY	24	1	1	Q9P0W2		0	1.27057e+08	0	0.002456	37.76	0.0407179	2	1115.51	-0.426085	27.9885	0	C1203	77.78	B1503	4	B1503	0.03
High	EAFQGTKVFV	29	1	1	P61289		0	9.85064e+07	0	0.005236	37.73	0.0621326	2	1125.59	-0.236117	57.2949	0	C1203	68.57	A6802	13	A6802	0.12
High	GKLLIGTLY	4	1	1	Q15165		0	1.29548e+07	0	0.003575	37.65	0.0112265	2	977.603	-0.205092	65.7643	0	C1203	37.04	B1503	49.2	B1503	1.1
High	TTFDKEFLL	31	1	1	O60306		0	9.22995e+07	0	0.005246	37.64	0.0529561	2	1113.58	-0.668583	71.8619	0	C1203	74.07	A6802	22.5	A6802	0.25
High	GKAFFLSSY	2	1	1	O75123		0	9.45041e+06	0	0.002229	37.63	0.0838067	2	1019.52	-0.708965	63.3414	0	C1203	40.74	B1503	7.4	B1503	0.12
High	EIFNLKFAQA	24	1	1	P78347		0	4.13555e+07	0	0.0008453	37.57	0.0578324	2	1180.64	0.115842	71.1021	0	C1203	8.57	A6802	102.8	A6802	0.8
High	VAASKKKVY	2	1	1	Q9H1D9		0	1.2388e+06	0	0.005519	37.55	0.0136503	2	993.609	-0.0642879	16.9902	0	C1203	92.59	B1503	205	C1203	2.5
High	GKYFGGVLEY	22	1	1	O94955		0	6.5183e+07	0	0.0003171	37.5	0.0732207	2	1132.57	-0.378936	64.767	0	C1203	40	B1503	16.5	B1503	0.4
High	EVMEWMNNV	7	1	1	Q92598		0	2.2578e+07	0	0.00221	37.24	0.0311896	2	1151.49	-0.363008	79.9027	0	C1203	40.74	A6802	2.7	A6802	0.01
High	RQYPEVIKY	23	1	1	Q9UIF8		0	4.97974e+07	0	0.002129	37.14	0.0595046	2	1195.65	-0.196702	42.5421	0	C1203	55.56	B1503	2.8	B1503	0.01
High	TTHFVEGGDA	17	1	1	P18124		0	3.10282e+07	0	0.002621	37.04	0.0463501	2	1033.46	-0.489511	30.24	0	C1203	20	A6802	466.7	A6802	2.5
High	YTSDLHFQV	25	1	1	Q1KMD3		0	6.63931e+07	0	0.003493	36.9	0.0742274	2	1109.53	-0.485735	60.4948	0	C1203	77.78	A6802	3.1	A6802	0.01
High	AKLDHVNIVHY	11	1	1	P19525		0	1.80658e+07	0	0.0005589	36.88	0.06174	3	1308.71	-0.346	39.6889	0		0	B1503	366.9	B1503	4
High	HVIEKMHHV	15	1	1	Q9BYX4		0	5.20517e+06	0	0.002743	36.86	0.080004	2	1129.59	-0.538418	20.3144	0	C1203	40.74	A6802	5.2	A6802	0.02
High	FAADIISVL	7	1	1	Q13200		0	91704720	0	0.005747	36.77	0.0575278	2	948.54	-0.347708	93.9167	0	C1203	92.59	C1203	3.3	C1203	0.01
High	DVTQIVEIL	7	1	1	Q86XP3		0	3.53657e+07	0	0.004762	36.72	0.0618012	2	1029.58	-0.604567	99.8026	0	C1203	40.74	A6802	406.7	A6802	1.9
High	ETFFGVQWV	12	1	1	P32970		0	4.89403e+07	0	0.00435	36.7	0.0709162	2	1112.54	-0.0971436	101.062	0	C1203	74.07	A6802	4.1	A6802	0.01
High	KKIESSGVTY	15	1	1	Q9UKN8		0	1.62655e+07	0	0.003254	36.63	0.0619328	2	1111.6	-0.428885	27.1754	0	C1203	31.43	B1503	10.6	B1503	0.25
High	YAFPKSITVF	16	1	1	P53985		0	3.99145e+07	0	0.001573	36.59	0.0788313	2	1172.64	0.41304	75.6886	0	C1203	77.14	B1503	5.9	C1203	0.06
High	SIYGSYRNF	18	1	1	Q7L576		0	3.26648e+07	0	0.00254	36.4	0.0843612	2	1106.53	-0.23369	52.3286	0	C1203	40.74	B1503	33.7	B1503	0.8
High	RKLDPPGGQFY	30	1	1	O95400		0	9.91623e+07	0	0.001115	36.39	0.0932925	2	1277.66	-0.196885	44.8842	0		0	B1503	443.7	B1503	4.5
High	EIMEIMQNL	3	1	1	Q13352		0	2.18069e+07	0	0.005369	36.17	0.0894566	2	1120.54	-0.975075	87.9371	0	C1203	40.74	A6802	14.4	A6802	0.12
High	RKFTQLREY	15	1	1	O95625		0	1.48681e+07	0	0.0003183	36.15	0.0617451	3	1240.68	-0.393276	29.5321	0	C1203	48.15	B1503	7.3	B1503	0.12
High	KAYFDVKEY	17	1	1	Q9UJX2		0	3.59046e+07	0	0.0006943	36.03	0.11096	2	1162.58	0.102555	45.6571	0	C1203	88.89	B1503	16.5	C1203	0.25
High	TTISKVSQV	10	1	1	Q9UNX4		0	4.32361e+07	0	0.006203	35.8	0.0553277	2	962.551	-0.736944	32.7364	0	C1203	74.07	A6802	10.2	A6802	0.08
High	FLWAGGRASY	1	1	1	Q00839		0	6.14406e+06	0	0.00432	35.79	0.084824	2	1127.56	-0.018872	61.128	0	C1203	42.86	B1503	12.9	B1503	0.3
High	VKNPDGGSY	17	1	1	Q15646		0	1.38663e+07	0	0.003308	35.76	0.107153	2	936.442	-0.37508	25.0597	0	C1203	48.15	B1503	21.6	B1503	0.6
High	RQFPTAFEF	23	1	1	Q13614		0	2.33022e+07	0	0.003263	35.75	0.0796222	2	1142.56	-0.477673	69.3513	0	C1203	44.44	B1503	2.3	B1503	0.01
High	YQYLEQSKY	1	1	1	Q9BTE7		0	7.36778e+06	0	0.000731	35.75	0.0994047	2	1221.58	0.0242146	45.5841	0	C1203	44.44	B1503	3.7	B1503	0.03
High	EVIWLTQHV	12	1	1	Q9UJW0		0	2.05857e+07	0	0.002419	35.68	0.0844446	2	1124.61	-0.000373463	67.8529	0	C1203	37.04	A6802	3.6	A6802	0.01
High	GKKKYETEF	22	1	1	Q96QD8		0	1.08298e+08	0	0.003082	35.68	0.116	2	1129.59	0.173122	22.506	0	C1203	33.33	B1503	132.8	B1503	2.5
High	RKFYKGKKY	49	1	1	P42766		0	1.78964e+08	0	0.002426	35.64	0.0501995	3	1217.72	0.121105	17.521	0	C1203	44.44	B1503	20.2	B1503	0.5
High	ETYQFSGVYV	17	1	1	P61160		0	1.20871e+08	0	0.004702	35.61	0.0857618	2	1192.55	0.161328	76.74	0	C1203	45.71	A6802	3.8	A6802	0.01
High	SQFKGYFIF	21	1	1	Q9NY27		0	3.96763e+07	0	0.004785	35.56	0.102293	2	1136.58	-0.0889716	77.0868	0	C1203	33.33	B1503	2.2	B1503	0.01
High	GQYSPPPYSEY	19	1	1	Q96BY9		0	4.23695e+07	0	0.0009785	35.41	0.04119	2	1287.55	-0.409776	59.5652	0		0	B1503	17.7	B1503	0.5
High	SAYEIIRDY	10	1	1	O60287		0	2.33838e+07	0	0.006067	35.39	0.0994972	2	1129.55	-0.130678	57.9037	0	C1203	88.89	C1203	16.7	C1203	0.06
High	KKIEKLEEY	20	1	1	O95786		0	4.05187e+07	0	0.006094	35.39	0.0787566	2	1179.66	-0.807824	25.0555	0	C1203	44.44	B1503	30.6	B1503	0.8
High	RQYAKDIGF	20	1	1	P62273		0	5.47269e+07	0	0.003827	35.27	0.0963117	2	1097.57	-0.520707	39.1212	0	C1203	37.04	B1503	2.6	B1503	0.01
High	KQPDNSPEY	28	1	1	Q9NX07		0	2.3907e+07	0	0.003368	35.19	0.0929262	2	1077.48	-0.427636	25.3748	0	C1203	44.44	B1503	27.2	B1503	0.7
High	AVTKIIAKV	22	1	1	P49419		0	5.10924e+07	0	0.005207	35.17	0.0105367	2	942.635	0.139952	33.9408	0	C1203	44.44	A6802	157.5	A6802	1.1
High	KKIDRHMYH	10	1	1	P84098		0	9.61278e+06	0	0.001709	35.08	0.113021	2	1227.64	-0.72391	17.6085	0	C1203	3.7	B1503	329.4	B1503	4
High	KQFPEVIKY	6	1	1	Q9UIF9		0	2.33252e+08	0	0.006215	34.83	0.0803878	2	1151.65	-0.458439	47.1918	0	C1203	55.56	B1503	3.6	B1503	0.03
High	KAYHEQLTV	36	1	1	Q9BQE3		0	162476563	0	0.004119	34.8	0.163777	2	1088.57	0.245061	30.1877	0	C1203	85.19	C1203	45.5	C1203	0.2
High	KKYGPKGYGY	16	2	2	P21291;Q16527		0	9.9081e+06	0	0.006169	34.77	0.134488	2	1160.61	-0.509018	24.5822	0	C1203	42.86	B1503	53.5	B1503	1.2
High	YQSDPSGNY	11	1	1	P25789		0	1.97842e+07	0	0.003913	34.75	0.0242515	2	1030.41	-0.769898	36.5105	0	C1203	48.15	B1503	5	B1503	0.05
High	YQSPHSGSF	8	1	1	P32004		0	1.09759e+07	0	0.002473	34.37	0.0683297	2	1009.44	-0.822502	32.3436	0	C1203	44.44	B1503	2	B1503	0.01
High	EVISGKQEGV	24	2	2	Q9Y227;Q9NQZ7		0	4.01361e+07	0	0.003216	34.35	0.168876	2	1045.55	-0.286622	32.4056	0	C1203	28.57	A6802	35.8	A6802	0.4
High	YVFDGKPPQL	16	1	1	P39748		0	2.6179e+07	0	0.003945	34.18	0.170882	2	1163.61	-0.451107	64.0688	0	C1203	57.14	C1203	243.1	C1203	1
High	AQLHPLSGY	8	1	1	Q7L7V1		0	1.17204e+07	0	0.004196	33.99	0.150532	2	985.51	-0.0638253	44.7298	0	C1203	40.74	B1503	5.8	B1503	0.08
High	MPAFIFEHI	28	1	1	O00560		0	1.23084e+08	0	0.003749	33.89	0.178027	2	1104.55	-0.6506	80.7894	0	C1203	33.33	A6802	21.7	A6802	0.2
High	AQRQDIAFAY	8	1	1	P07355		0	2.81742e+07	0	0.004654	33.86	0.149083	2	1182.59	-0.399142	52.5141	0	C1203	31.43	B1503	8.4	B1503	0.15
High	KHQPHKVTQY	33	2	2	P83881;Q969Q0		0	5.071e+07	0	0.004598	33.82	0.147827	2	1265.67	-0.174677	17.3176	0	C1203	31.43	B1503	59.5	B1503	1.3
High	DTFYIFNHV	9	1	1	Q99805		0	2.31673e+07	0	0.003858	33.76	0.116773	2	1155.55	-0.350408	78.4364	0	C1203	70.37	A6802	3.2	A6802	0.01
High	GKYLELLGY	7	1	1	O94979		0	1.66453e+07	0	0.004166	33.65	0.121775	2	1055.58	-0.698846	71.8665	0	C1203	44.44	B1503	29.9	B1503	0.8
High	RKVYWFEKF	6	1	1	O60524		0	1.71962e+07	0	0.004376	33.61	0.199508	3	1302.7	0.0969222	53.2819	0	C1203	29.63	B1503	19	B1503	0.5
High	EVSRISEVL	12	1	1	Q07065		0	30181114	0	0.003455	33.58	0.167475	2	1031.57	-0.0325562	51.9772	0	C1203	44.44	A6802	31.7	A6802	0.3
High	SKYAADRNHY	11	1	1	P67809		0	9.54043e+06	0	0.004515	33.55	0.156868	2	1224.58	-0.0181106	19.6401	0	C1203	31.43	B1503	31.6	B1503	0.8
High	GKGKFGNVY	17	3	3	O14965;Q96GD4;Q9UQB9		0	4.3378e+07	0	0.005493	33.39	0.157463	2	969.515	-0.351849	26.5749	0	C1203	40.74	B1503	27.1	B1503	0.7
High	ETIPLTAEKL	25	1	1	P24385		0	9.66772e+07	0	0.003384	33.27	0.136089	2	1114.63	-1.02846	58.1612	0	C1203	51.43	A6802	13.7	A6802	0.12
High	EVFGVIRSL	17	1	1	Q15393		0	3.1721e+07	0	0.004645	33.23	0.121733	2	1019.59	-0.213714	69.4769	0	C1203	51.85	A6802	24.5	A6802	0.25
High	GQAPPGKAL	40	1	1	A8MPP1		0	40883173	0	0.005648	33.1	0.124404	2	838.478	0.164325	25.2131	0	C1203	51.85	B1503	25.1	B1503	0.7
High	SSFPTVVIY	41	1	1	Q9HCN4		0	3.90832e+08	0	0.004711	32.95	0.152984	2	1012.53	-0.643873	81.9978	0	C1203	85.19	B1503	15.2	C1203	0.06
High	NVAEVTQSEI	5	2	2	Q9NVD7;Q9HBI1		0	4.04912e+07	0	0.004548	32.87	0.229186	2	1089.54	0.217309	54.2485	0	C1203	14.29	A6802	21.9	A6802	0.2
High	QVCAIIERV	84	2	2	Q99613;B5ME19		0	7.01664e+08	0	0.005802	32.76	0.16303	2	1030.57	-0.0918313	55.4512	0	C1203	40.74	A6802	95.1	A6802	0.8
High	EIFSRGPYSV	9	1	1	Q7LBC6		0	2.35644e+07	0	0.003458	32.75	0.205293	2	1154.58	-0.47429	57.4263	0	C1203	40	A6802	25.9	A6802	0.25
High	KAADIASKV	11	1	1	O95671		0	6.66381e+06	0	0.003953	32.74	0.169636	2	902.53	-0.389238	24.8127	0	C1203	81.48	C1203	60.3	C1203	0.3
High	RQLEDILSTY	27	1	1	P40222		0	6.99718e+07	0	0.002508	32.68	0.199268	2	1237.64	-0.0580032	67.0738	0	C1203	28.57	B1503	5.5	B1503	0.07
High	SKMFHPNVY	18	2	2	P49459;P63146		0	2.74548e+07	0	0.00342	32.64	0.196103	2	1122.54	-0.456928	37.1909	0	C1203	44.44	B1503	4.3	B1503	0.04
High	RSYPYAFSV	24	1	1	Q5H9F3		0	3.30861e+07	0	0.006253	32.44	0.210733	2	1089.54	-0.0815195	58.9258	0	C1203	77.78	C1203	13.9	C1203	0.04
High	FQYPDTRYL	18	1	1	Q9NY61		0	2.89298e+07	0	0.004149	32.43	0.186874	2	1202.58	-0.235715	63.3201	0	C1203	55.56	B1503	5.4	C1203	0.01
High	FKNIQPSSF	12	1	1	Q9BVQ7		0	2.10013e+07	0	0.003879	32.39	0.225487	2	1067.55	-0.354043	49.1988	0	C1203	37.04	B1503	6.1	B1503	0.08
High	FISEIIHQL	4	1	1	Q9C040		0	1.54403e+07	0	0.003473	32.28	0.204976	2	1099.61	-0.545673	74.1652	0	C1203	51.85	A6802	10	C1203	0.06
High	LSADIFQQV	13	1	1	O94916		0	1.19158e+08	0	0.006179	32.07	0.331296	2	1020.54	-0.381339	79.3216	0	C1203	74.07	A6802	15.5	A6802	0.15
High	DVYSGTPTKV	29	1	1	Q14493		0	1.31425e+08	0	0.004984	32	0.249985	2	1066.54	-0.457625	41.684	0	C1203	40	A6802	108.4	A6802	0.8
High	FASFILRTL	1	1	1	O95838		0	6.01363e+06	0	0.00288	31.96	0.102365	2	1067.62	-0.721475	78.6647	0	C1203	88.89	C1203	8.1	C1203	0.01
High	FKKPGSKNF	1	3	3	P26599;Q9UKA9;O95758		0	5.83721e+06	0	0.006107	31.91	0.15444	2	1052.59	-0.694484	22.1686	0	C1203	44.44	B1503	28.6	B1503	0.7
High	RQFMAETQF	10	1	1	Q14444		0	2.82424e+07	0	0.003627	31.87	0.174852	2	1157.54	-1.09104	53.235	0	C1203	33.33	B1503	2.3	B1503	0.01
High	FVNEIISRI	4	1	1	P43246		0	1.71549e+07	0	0.001883	31.85	0.162303	2	1090.63	-0.256331	68.112	0	C1203	40.74	C1203	17	C1203	0.06
High	RTTDIVIRI	8	1	1	Q9C0C9		0	1.19446e+08	0	0.005422	31.78	0.0917957	2	1086.66	-0.570725	50.6315	0	C1203	70.37	A6802	375.8	C1203	1.4
High	YAFPKAVSV	38	1	1	O15427		0	4.22759e+08	0	0.005918	31.76	0.218012	2	981.541	0.0841609	57.8598	0	C1203	92.59	C1203	2.7	C1203	0.01
High	EVSFVIHNL	36	2	2	P49903;Q99611		0	2.92218e+08	0	0.005971	31.63	0.285649	2	1057.57	-1.07358	66.203	0	C1203	44.44	A6802	6.3	A6802	0.04
High	RKLPEKTQTF	25	1	1	Q96SY0		0	5.53219e+07	0	0.004339	31.63	0.153319	3	1247.71	-0.24804	25.0932	0	C1203	34.29	B1503	39.5	B1503	1
High	ETYPDPVRV	88	1	1	P49588		0	2616622156	0	0.005165	31.62	0.364986	2	1075.54	0.0245606	49.7794	0	C1203	85.19	A6802	9.8	A6802	0.07
High	EVIAEAVGV	17	1	1	O15226		0	2.28378e+07	0	0.004418	31.52	0.253478	2	886.488	0.210396	63.5329	0	C1203	40.74	A6802	4.9	A6802	0.02
High	GKFNVLLTTY	2	2	2	P51531;P51532		0	1.19323e+07	0	0.003469	31.48	0.199531	2	1155.64	0.0393196	67.1293	0	C1203	37.14	B1503	34.5	B1503	0.9
High	NTIPFIIRY	28	1	1	Q8N5C6		0	1.17958e+08	0	0.003609	31.35	0.156898	2	1136.65	-0.540026	74.0899	0	C1203	81.48	C1203	142.6	C1203	0.7
High	RQYGSEGRFTF	23	2	2	Q7Z7H5;Q9BVK6		0	6.30348e+07	0	0.004298	31.19	0.307096	3	1347.64	-0.425938	45.5387	0		0	B1503	8.2	B1503	0.15
High	AKQPHVGDY	8	1	1	Q06323		0	4.20605e+06	0	0.005475	31.13	0.258368	2	1014.5	-0.118872	24.66	0	C1203	51.85	B1503	36.4	B1503	0.9
High	AAMPRPVSY	25	1	1	Q6TFL4		0	5.02746e+07	0	0.00532	31	0.29696	2	991.503	0.211928	42.6632	0	C1203	92.59	B1503	7.3	C1203	0.04
High	AQLPEKVEY	16	1	1	P51532		0	75817961	0	0.005592	30.96	0.42501	2	1076.56	-0.102096	46.9243	0	C1203	55.56	B1503	11.1	B1503	0.25
High	RLFGTTVTF	31	1	1	Q15904		0	1.34318e+08	0	0.004729	30.88	0.253426	2	1041.57	-0.937389	65.9608	0	C1203	44.44	B1503	3	B1503	0.01
High	GKYGFSDPLTF	6	2	2	Q92569;P27986		0	1.18158e+07	0	0.005324	30.88	0.321325	2	1231.6	-0.0978705	73.2614	0		0	B1503	51	B1503	1.2
High	YKAPITNEF	2	1	1	Q9Y4X0		0	10402991	0	0.004161	30.81	0.347749	2	1082.55	-0.260588	50.9582	0	C1203	48.15	B1503	7.7	B1503	0.15
High	EAADVWYNL	14	1	1	Q8TAM2		0	4.09528e+07	0	0.005604	30.73	0.285535	2	1080.5	-0.687029	82.7676	0	C1203	81.48	A6802	8.6	A6802	0.06
High	TAAFWTRLY	1	2	2	Q8IXX5;Q1AE95		0	1.13981e+07	0	0.004116	30.63	0.261739	2	1128.58	-0.455277	73.3004	0	C1203	81.48	C1203	28.2	C1203	0.12
High	HKFPDEDSY	46	1	1	Q6VY07		0	1.54253e+08	0	0.005336	30.6	0.131341	2	1137.48	-0.405079	34.4735	0	C1203	48.15	B1503	55.7	B1503	1.3
High	YTSGPGSRI	37	1	1	P05787		0	2.66228e+08	0	0.004353	30.57	0.281649	2	937.473	-0.780012	28.8655	0	C1203	70.37	A6802	79.7	C1203	0.4
High	YTFGRIVIY	7	1	1	Q9UBB9		0	1.41502e+07	0	0.001026	30.55	0.302024	2	1131.62	0.0594505	73.6431	0	C1203	85.19	C1203	5.7	C1203	0.01
High	AQYENPPHIY	10	2	2	Q12965;O00160		0	2.55884e+07	0	0.001354	30.55	0.244799	2	1231.57	-0.268893	47.9524	0	C1203	40	B1503	5.7	B1503	0.07
High	VKIQKHVTF	6	1	1	P23381		0	7.22861e+06	0	0.005244	30.38	0.150672	2	1099.66	-1.00112	28.6033	0	C1203	40.74	B1503	9.3	B1503	0.17
High	RLFKDQLVY	15	1	1	Q9Y3I1		0	3.80746e+07	0	0.002195	30.36	0.195089	2	1181.67	-0.0940723	51.6376	0	C1203	48.15	B1503	4.1	B1503	0.03
High	EAAFFEGHFL	19	1	1	Q5W0V3		0	3.11512e+07	0	0.005457	30.3	0.344557	2	1167.55	0.0457104	76.2365	0	C1203	60	A6802	27.9	A6802	0.3
High	GKLQKTVSY	12	1	1	P12757		0	9.32758e+06	0	0.003488	30.29	0.191665	2	1023.58	-0.766103	26.9059	0	C1203	40.74	B1503	16.5	B1503	0.4
High	YVTTSTRTY	15	1	1	P08670		0	4.35244e+07	0	0.006042	30.1	0.506795	2	1091.54	-0.31767	32.0323	0	C1203	48.15	B1503	34.5	C1203	0.17
High	QVFEGHTHYV	28	1	1	P35606		0	1.784e+08	0	0.00402	29.89	0.285234	2	1216.57	-0.451343	35.8437	0	C1203	37.14	A6802	5.1	A6802	0.02
High	YIKDFFEQM	3	1	1	Q5U649		0	2.59387e+07	0	0.002612	29.88	0.329736	2	1220.57	-0.0589427	72.7475	0	C1203	37.04	C1203	55.3	C1203	0.25
High	FAWPKILKI	13	2	2	Q9H4G0;O43491		0	4.40473e+07	0	0.005924	29.75	0.0618075	2	1115.7	0.380341	75.9379	0	C1203	85.19	C1203	14	C1203	0.04
High	RKYNELLKSY	18	1	1	P10909		0	4.85975e+07	0	0.002062	29.57	0.327746	3	1313.72	0.0344774	35.1283	0	C1203	34.29	B1503	15.3	B1503	0.4
High	RQINWTVLY	16	1	1	P83731		0	9.33373e+07	0	0.00492	29.42	0.357607	2	1192.65	-0.584629	69.7521	0	C1203	40.74	B1503	2.5	B1503	0.01
High	HSVYITSRV	24	1	1	Q8N961		0	4.806e+07	0	0.004628	29.4	0.448239	2	1061.57	-0.0595649	32.0053	0	C1203	66.67	A6802	5.7	A6802	0.03
High	YTAEIKQNL	12	1	1	O95926		0	1.4849e+07	0	0.005746	29.39	0.44628	2	1079.57	-0.577947	42.1397	0	C1203	77.78	A6802	20.9	A6802	0.2
High	FSKDIFSVI	43	1	1	Q01650		0	3.46851e+08	0	0.006162	29.34	0.3206	2	1055.58	-0.94908	76.8423	0	C1203	70.37	C1203	14.4	C1203	0.05
High	VKVIDRILY	8	1	1	O75533		0	2.73852e+07	0	0.003927	29.34	0.0700222	2	1118.69	-0.406437	52.6148	0	C1203	44.44	B1503	42	B1503	1
High	YAAGVHSVL	17	1	1	O43299		0	1.97707e+07	0	0.005494	29.24	0.622186	2	916.488	-0.428212	43.1496	0	C1203	88.89	C1203	7.6	C1203	0.01
High	KKHEDVKQY	3	1	1	Q9BZD4		0	1.92926e+06	0	0.004214	29.06	0.504794	2	1174.62	-0.33198	16.3107	0	C1203	48.15	B1503	56.9	B1503	1.3
High	WQKGIGEFF	2	1	1	Q15004		0	1.18185e+07	0	0.003666	28.99	0.381829	2	1111.56	-0.864875	69.9055	0	C1203	33.33	B1503	12.9	B1503	0.3
High	ESFEKAYQV	31	1	1	Q86V86		0	2.06276e+08	0	0.00553	28.96	0.420433	2	1100.53	0.0229027	46.5939	0	C1203	74.07	A6802	6.1	A6802	0.03
High	KAIDYIRFL	22	1	1	P36956		0	3.32505e+07	0	0.003984	28.93	0.205469	2	1138.66	0.287833	66.9376	0	C1203	85.19	C1203	20.2	C1203	0.08
High	RNYYRKIGY	13	1	1	Q9H9T3		0	1.68795e+07	0	0.004914	28.81	0.644986	3	1232.65	-0.177169	29.1536	0	C1203	44.44	B1503	72.3	B1503	1.5
High	RQFPVTVHF	18	1	1	Q8IY37		0	3.05857e+07	0	0.0009898	28.77	0.559099	2	1130.61	-0.377035	53.9186	0	C1203	44.44	B1503	2.5	B1503	0.01
High	EVFNYIHNI	27	1	1	Q8N3P4		0	8.09406e+07	0	0.006099	28.6	0.657201	2	1148.57	0.33854	65.7544	0	C1203	37.04	A6802	4.4	A6802	0.01
High	TTFEHAHNm	9	1	1	P13639	M9(Oxidation)	0	4.41969e+06	0	0.001536	28.54	0.139679	2	1103.46	-0.498	20.4361	0	C1203	66.67	C1203	25.6	C1203	0.1
High	KQFQKVITEY	15	1	1	Q7KZF4		0	38094015	0	0.001118	28.49	0.456027	2	1283.7	-0.429355	39.579	0	C1203	37.14	B1503	5	B1503	0.05
High	YTTDFIYQL	15	1	1	Q01813		0	9.55201e+07	0	0.003121	28.45	0.552696	2	1163.56	-0.309622	87.8254	0	C1203	77.78	A6802	7.7	A6802	0.05
High	RKLEAAEDIAY	21	1	1	P35232		0	9.32869e+07	0	0.002767	28.02	0.696515	2	1278.67	-0.596622	41.2932	0		0	B1503	103.4	B1503	1.9
High	YTTDRVMTV	18	2	2	Q13547;Q92769		0	2.54388e+07	0	0.006243	27.93	0.549955	2	1085.53	-0.470708	44.1037	0	C1203	81.48	C1203	6.7	C1203	0.01
High	AQFETKKLY	36	1	1	O60613		0	1.68042e+08	0	0.004709	27.93	0.5386	2	1127.61	-0.456641	36.3713	0	C1203	51.85	B1503	4.1	B1503	0.03
High	NSYVSPRIL	30	1	1	Q9H992		0	76846243	0	0.005619	27.81	0.605267	2	1048.58	-0.408841	52.1844	0	C1203	77.78	C1203	143.8	C1203	0.7
High	KLVDFVIHF	2	1	1	P59998		0	27395856	0	0.002157	27.81	0.473219	2	1117.64	0.48988	75.8326	0	C1203	40.74	B1503	15.8	B1503	0.4
High	KHFGTILNY	24	2	2	Q13829;Q9H3F6		0	1.02463e+08	0	0.006289	27.58	0.570011	2	1092.58	0.0975057	47.2599	0	C1203	51.85	B1503	8.4	B1503	0.15
High	YQKQPKIGY	3	1	1	Q68E01		0	1.06262e+07	0	0.00317	27.33	0.577989	2	1124.61	-0.416768	31.0021	0	C1203	44.44	B1503	9.2	B1503	0.17
High	TKYLENQAF	6	1	1	Q99661		0	2.80109e+07	0	0.003384	27.3	0.697352	2	1113.56	-0.0993702	47.2354	0	C1203	33.33	B1503	9.3	B1503	0.17
High	YVVPFVAKV	15	1	1	A5YKK6		0	1.56211e+07	0	0.003595	27.29	0.263626	2	1021.61	-0.578296	67.381	0	C1203	51.85	A6802	7.3	A6802	0.05
High	AAYGELRAM	3	1	1	Q9UL46		0	1.68951e+07	0	0.004737	27.03	0.602582	2	981.482	-0.11921	46.0377	0	C1203	81.48	C1203	15.4	C1203	0.05
High	EAFHGKFYEA	43	1	1	Q13045		0	2.86566e+08	0	0.004865	26.8	0.59242	2	1198.55	-0.109629	40.2155	0	C1203	42.86	A6802	26.5	A6802	0.25
High	RKIGDTSVSY	24	1	1	P20700		0	5.89914e+07	0	0.005864	26.79	0.691371	2	1125.59	-0.225741	34.0885	0	C1203	37.14	B1503	11	B1503	0.25
High	ETFNDFVRL	18	1	1	O43913		0	3.6769e+07	0	0.005466	26.61	0.832602	2	1140.57	-0.0388633	72.8262	0	C1203	74.07	A6802	16	A6802	0.15
High	IQWENNGQVF	6	1	1	P28300		0	9.93992e+06	0	0.005239	26.31	0.906182	2	1234.59	0.370641	73.7259	0	C1203	40	B1503	4.7	B1503	0.05
High	RSTKTGTAY	18	1	1	P17844		0	6.13867e+07	0	0.004257	26.12	0.835653	2	984.51	-0.557394	17.2145	0	C1203	66.67	B1503	17	B1503	0.5
High	YKKGKDSLY	17	2	2	P83881;Q969Q0		0	2.38e+07	0	0.002754	25.75	1.27435	2	1101.59	-0.214028	21.0141	0	C1203	44.44	B1503	33.8	B1503	0.8
High	VQFGANKSQY	14	1	1	Q7Z7E8		0	1.55257e+07	0	0.005075	25.75	0.934979	2	1141.56	-0.565383	36.6608	0	C1203	40	B1503	6.1	B1503	0.08
High	RKIANSDKY	7	1	1	O75164		0	3.12843e+06	0	0.00559	25.58	0.83866	2	1094.59	-0.94594	18.24	0	C1203	37.04	B1503	33.4	B1503	0.8
High	VmAPRTLIL	54	8	8	P04222;P30504;Q9TNN7;Q29963;P30505;P30508;P30510;Q29960	M2(Oxidation)	0	170201910	0	0.006016	25.53	0.502837	2	1029.61	-0.57325	58.1963	0	C1203	55.56	B1503	16.1	B1503	0.4
High	EVIGKITAL	33	1	1	O43264		0	1.02483e+08	0	0.004527	25.52	0.497123	2	943.582	-0.440403	56.5569	0	C1203	44.44	A6802	28.2	A6802	0.3
High	GKTTQITQY	12	1	2	Q14562;Q92620		0	1.46685e+07	0	0.003865	25.45	0.941121	2	1039.54	-0.0727767	30.7277	0	C1203	40.74	B1503	147.4	B1503	2.5
High	KKKEKDVQF	5	1	1	Q92544		0	3.23951e+06	0	0.003915	25.44	0.512509	2	1149.66	0.0661284	17.7367	0	C1203	37.04	B1503	112.3	B1503	2
High	QKFLQGLVY	19	1	1	Q5J8M3		0	6.74582e+07	0	0.00605	25.39	0.676997	2	1095.62	-0.281973	66.587	0	C1203	48.15	B1503	7	B1503	0.12
High	HVFDHPWETV	30	1	1	Q9Y3B1		0	7.79792e+07	0	0.005218	25.11	1.11118	2	1266.59	0.0128374	55.9693	0	C1203	37.14	A6802	16.8	A6802	0.15
High	EVAPSFGTL	24	1	1	Q5SRE5		0	1.42166e+08	0	0.0032	24.96	1.7796	2	920.472	-0.223508	70.2013	0	C1203	51.85	A6802	10.3	A6802	0.08
High	RHKSHDNVY	5	1	1	Q86SQ0		0	4.78982e+06	0	0.003511	24.96	1.04635	2	1155.57	0.0657568	16.3674	0	C1203	44.44	B1503	15.5	B1503	0.4
High	RKAASLKSNY	9	1	1	P36578		0	5.79162e+06	0	0.00416	24.86	0.753275	2	1137.64	-0.556312	19.3715	0	C1203	28.57	B1503	37.6	B1503	0.9
High	YKITAEEMY	4	1	1	Q9Y3B4		0	1.22131e+07	0	0.004681	24.61	1.02173	2	1147.53	0.498632	52.7524	0	C1203	40.74	B1503	35.3	B1503	0.9
High	ETFMNRVEV	17	1	1	Q9UBU8		0	4.48176e+07	0	0.004515	24.56	1.15744	2	1124.54	-0.286845	55.0614	0	C1203	77.78	A6802	4.8	A6802	0.02
High	RAFEYEIRF	30	1	1	O60566		0	56479125	0	0.006127	24.35	1.36464	2	1230.63	-1.28691	60.4091	0	C1203	77.78	B1503	9.5	B1503	0.2
High	EDFFARNSYV	7	1	1	P11413		0	8.83487e+06	0	0.003868	24.09	1.15559	2	1247.57	-0.12342	63.3925	0	C1203	31.43	A6802	258.4	A6802	1.5
High	GKWKQISKY	12	1	1	Q9H8X2		0	1.25236e+07	0	0.005405	23.89	0.877887	2	1137.64	-0.656298	25.7487	0	C1203	40.74	B1503	69.6	B1503	1.5
High	DTFDKNYKA	24	1	1	Q9BZG1		0	6.734e+07	0	0.004975	23.82	1.3181	2	1101.52	0.0131299	29.9368	0	C1203	37.04	A6802	23.9	A6802	0.25
High	DTATAHSWFV	14	1	1	Q13425		0	3.92158e+07	0	0.006185	23.64	1.21385	2	1134.52	-0.609727	64.6953	0	C1203	40	A6802	10.6	A6802	0.08
High	VKAEIRQQF	3	1	1	P30154		0	1.48974e+07	0	0.004978	23.59	1.16884	2	1118.63	-0.618842	33.3675	0	C1203	40.74	B1503	33.2	B1503	0.8
High	SAYANAKKY	14	1	1	O60524		0	3.74974e+06	0	0.005367	22.76	2.24869	2	1015.52	-0.423457	20.936	0	C1203	81.48	C1203	27.9	C1203	0.12
High	HTILIVEKV	27	1	1	Q8TD19		0	7.69751e+07	0	0.005961	22.73	0.300268	2	1051.65	-0.00259087	45.4763	0	C1203	70.37	A6802	7.1	A6802	0.04
High	RAFGIPIRV	35	1	1	P06493		0	663002711	0	0.003146	22.7	0.793464	2	1028.64	-0.139245	54.9001	0	C1203	88.89	C1203	30	C1203	0.12
High	EAYDQRQDTV	9	1	1	Q99426		0	2.15053e+07	0	0.002723	22.46	1.34593	2	1224.55	-0.532267	31.7663	0	C1203	60	A6802	262.4	A6802	1.5
High	HQITVLHVY	12	1	1	Q9NYP7		0	5.65846e+07	0	0.004753	22.25	1.58476	2	1109.61	-0.279756	45.9222	0	C1203	40.74	B1503	3.8	B1503	0.03
High	KRFEPGTQRF	3	1	1	Q70IA8		0	1.57818e+07	0	0.005879	22.23	1.90056	3	1265.67	-0.385686	28.4033	0	C1203	45.71	B1503	42.6	B1503	1
High	FAFPLHVDY	12	1	1	Q8TDY4		0	2.90686e+07	0	0.004965	21.9	2.2501	2	1108.55	-0.0461173	78.0533	0	C1203	92.59	C1203	8.8	C1203	0.02
High	EIIQRIENV	2	1	1	Q9H074		0	34087239	0	0.005382	21.79	1.93202	2	1113.63	-0.358477	53.6337	0	C1203	40.74	A6802	26.7	A6802	0.25
High	FTTHILEVI	1	1	1	P15927		0	2.08432e+08	0	0.005185	21.61	2.9028	2	1072.6	-0.412284	72.9575	0	C1203	66.67	A6802	21.4	C1203	0.17
High	RQLGLEHTRY	10	1	1	Q92508		0	4.61618e+06	0	0.00362	21.37	3.03673	3	1272.68	0.414296	29.6989	0	C1203	31.43	B1503	15	B1503	0.4
High	YGYEHILTL	4	1	1	Q96AX1		0	3.84608e+07	0	0.003207	21.21	3.56922	2	1108.57	-0.258983	69.1464	0	C1203	59.26	C1203	5.3	C1203	0.01
High	KKKQIEQKF	5	1	1	Q9NQS7		0	9.08795e+06	0	0.006	21.12	0.778476	2	1176.71	0.0316444	17.9075	0	C1203	29.63	B1503	242.7	B1503	3.5
High	ETFNTPAmYV	59	7	7	Q9BYX7;P60709;P63261;Q6S8J3;A5A3E0;P0CG38;P0CG39	M8(Oxidation)	0	362684218	0	0.006289	20.56	1.70267	2	1188.52	-0.392975	69.4372	0	C1203	48.57	A6802	4.3	A6802	0.01
High	DSFYVHHDI	9	1	1	Q13610		0	1.37347e+07	0	0.002598	20.47	1.79396	2	1132.51	-0.355502	44.1358	0	C1203	62.96	A6802	62.1	A6802	0.6
High	AKKEKEPEY	8	1	1	O95793		0	3.32874e+06	0	0.004086	20.03	4.50279	2	1121.58	0.132494	17.5723	0	C1203	48.15	B1503	226.2	B1503	3.5
High	RKFPGRPEEEY	18	1	1	Q9NUQ8		0	31559742	0	0.006163	19.76	4.95647	3	1407.7	0.412935	30.9015	0		0	B1503	167.2	B1503	3
High	EVFDKTYQFL	7	1	1	Q96EU6		0	1.98908e+07	0	0.002356	19.66	4.22949	2	1289.64	0.103688	73.0513	0	C1203	48.57	A6802	13.4	A6802	0.12
High	KQQNPRLVY	13	1	1	O00764		0	2.785e+07	0	0.004557	19.39	3.56345	2	1145.64	-0.191785	29.7393	0	C1203	44.44	B1503	3.3	B1503	0.02
High	RQEGVPRTF	45	1	1	Q00403		0	258538414	0	0.00439	18.82	5.67133	2	1089.58	-0.352299	31.4786	0	C1203	44.44	B1503	9.5	B1503	0.2
High	RKFEPGTQRF	4	2	2	Q96BX8;Q86TA1		0	1.41254e+07	0	0.002693	18.76	4.71912	3	1265.67	-0.0240108	28.473	0	C1203	45.71	B1503	12.9	B1503	0.3
High	KKRENDKVKY	6	1	1	Q9UKG1		0	4.33063e+06	0	0.00281	18.73	2.48912	3	1307.74	0.0113513	16.2245	0	C1203	28.57	B1503	270.9	B1503	3.5
High	DTADQVIASFKV	1	1	1	O43707		0	2.06478e+07	0	0.002256	17.01	7.94478	2	1293.67	0.137184	79.0184	0		0	A6802	201.8	A6802	1.3
High	RKAPPNYAM	14	1	1	Q92541		0	1.2979e+07	0	0.003874	16.53	9.12558	2	1047.54	-0.823759	25.7939	0	C1203	40.74	B1503	18.7	B1503	0.5
High	YATFIVTNY	11	1	1	Q9HBL8		0	4.36458e+07	0	0.004166	14.78	15.3971	2	1091.54	0.239958	76.8468	0	C1203	81.48	C1203	25.5	C1203	0.1
High	GQRKGAGSVF	31	1	1	P62917		0	2.61897e+08	0.001	0.007678	57.37	0.000619231	2	1006.54	-0.683934	23.3043	0	C1203	42.86	B1503	9.8	B1503	0.2
High	TASPVIKAV	40	1	1	Q8WU10		0	9.1519e+08	0.001	0.01071	53.19	0.00119861	2	885.54	-0.262629	37.8234	0	C1203	92.59	C1203	69.4	C1203	0.4
High	AAASIANIV	21	1	1	P17987		0	3.53337e+07	0.001	0.008507	52.49	0.00248226	2	829.477	-0.527735	64.8467	0	C1203	85.19	C1203	94.9	C1203	0.5
High	KASPLTFTV	21	1	1	P09884		0	9.84481e+07	0.001	0.008255	51.07	0.0022378	2	963.55	-0.622383	56.8247	0	C1203	88.89	C1203	66.2	C1203	0.3
High	ELFPIQMEGV	1	1	1	O96008		0	2.3365e+07	0.001	0.008262	50.53	0.00390734	2	1162.58	-0.625587	91.7945	0	C1203	34.29	A6802	20.6	A6802	0.2
High	EISSILQEL	36	2	2	Q96L14;Q5SW79		0	2.70895e+08	0.001	0.009066	50.34	0.00357997	2	1031.56	-0.0233169	89.6603	0	C1203	48.15	A6802	41.7	A6802	0.4
High	ASYSGLMRI	1	1	1	Q13098		0	1.24127e+07	0.001	0.007202	49.11	0.00385355	2	997.514	-0.0350188	58.3176	0	C1203	70.37	C1203	50.5	C1203	0.25
High	NASPVISSV	23	1	1	Q96T58		0	9.11312e+07	0.001	0.01113	48.97	0.00724273	2	873.468	0.0431223	49.8746	0	C1203	88.89	A6802	8.5	A6802	0.06
High	FLYPFPLAL	5	1	1	Q5BJD5		0	6.0156e+07	0.001	0.007174	48.37	0.00295167	2	1080.61	-0.480296	107.337	0	C1203	59.26	C1203	4.7	C1203	0.01
High	DVSNVIEKV	66	1	1	O94955		0	2.17196e+09	0.001	0.007112	47.07	0.00817641	2	1002.55	-0.520832	54.9868	0	C1203	44.44	A6802	30.2	A6802	0.3
High	SAIDRIFTL	33	1	1	Q86TU7		0	1.34624e+08	0.001	0.01021	46.93	0.0055964	2	1035.58	-0.187159	76.9612	0	C1203	85.19	C1203	10.1	C1203	0.03
High	AMNPTNTVF	46	1	1	P11142		0	3.39758e+08	0.001	0.01023	46.82	0.00771983	2	994.466	-0.671244	60.7187	0	C1203	44.44	B1503	2.8	B1503	0.01
High	EVANLLQGV	9	1	1	Q5VIR6		0	1.24535e+07	0.001	0.009502	46.71	0.00677988	2	942.525	-0.0881422	74.09	0	C1203	40.74	A6802	3.5	A6802	0.01
High	ELSDIAHRI	11	1	1	P04075		0	3.2198e+07	0.001	0.008333	46.52	0.00713322	2	1053.57	-0.471157	46.2316	0	C1203	37.04	A6802	57	A6802	0.5
High	DVVNILVYV	16	1	1	Q15652		0	2.61602e+07	0.001	0.01032	46.51	0.00544433	2	1033.59	-0.275161	104.645	0	C1203	40.74	A6802	4.7	A6802	0.01
High	VASDLVMKV	7	1	1	Q9NYU2		0	3.55582e+07	0.001	0.009336	46.18	0.0090745	2	961.538	-0.314691	53.3327	0	C1203	88.89	C1203	60.3	C1203	0.3
High	LKPGMVVTF	31	2	2	P68104;Q5VTE0		0	5.8508e+07	0.001	0.01071	46.07	0.00624481	2	991.565	0.00046281	61.2155	0	C1203	44.44	B1503	58.1	B1503	1.3
High	IASPVIAAV	12	1	1	Q6ZMZ0		0	19726434	0.001	0.007498	45.46	0.00370633	2	840.519	0.057384	66.57	0	C1203	88.89	C1203	11.1	C1203	0.03
High	SVTQIYHAV	21	1	1	P04844		0	5.66969e+07	0.001	0.009538	45.17	0.0159053	2	1017.54	0.0326788	46.2628	0	C1203	37.04	A6802	11.8	A6802	0.1
High	GKNPDEVSY	15	1	1	O95391		0	6.22023e+07	0.001	0.006452	45.01	0.0127399	2	1008.46	-0.238983	30.5266	0	C1203	48.15	B1503	70	B1503	1.5
High	TTVDINTQV	38	1	1	Q14676		0	335467808	0.001	0.01085	44.72	0.0133852	2	990.51	-0.442274	54.2956	0	C1203	70.37	A6802	3.9	A6802	0.01
High	KKKSPASTF	10	1	1	Q86U70		0	6.00306e+06	0.001	0.009648	44.51	0.00716668	2	993.572	-0.368374	17.8116	0	C1203	37.04	B1503	7.4	B1503	0.12
High	HTINGHNAEV	49	1	1	P22626		0	7.49156e+08	0.001	0.008488	44.21	0.0146245	2	1091.52	-0.900683	23.1533	0	C1203	45.71	A6802	16.9	A6802	0.15
High	NAFPEIFYT	1	1	1	Q99570		0	3.23066e+07	0.001	0.01115	44.21	0.0117341	2	1101.52	-0.311775	88.5517	0	C1203	51.85	A6802	147.1	A6802	1
High	FASHVSPEV	34	1	1	Q9NP61		0	4.43928e+08	0.001	0.007173	43.87	0.0154975	2	972.478	-1.00222	39.3739	0	C1203	85.19	C1203	13.7	C1203	0.04
High	SVALVIHNV	7	1	1	Q8WVV5		0	1.82883e+07	0.001	0.007345	43.61	0.00643469	2	951.562	-0.0524529	52.4516	0	C1203	44.44	A6802	6.1	A6802	0.03
High	GQFSKPFSF	3	1	1	P35658		0	6.95153e+06	0.001	0.008315	43.43	0.0143037	2	1044.51	-0.711857	61.6659	0	C1203	40.74	B1503	2.8	B1503	0.01
High	AAYAGGLVL	2	1	1	P09884		0	18182257	0.001	0.01071	43.39	0.0203278	2	834.472	-0.0597661	70.4102	0	C1203	88.89	B1503	9.9	C1203	0.06
High	SAAEIYNEV	19	1	1	Q9BVG8		0	5.94037e+07	0.001	0.009184	43.28	0.0192351	2	995.468	-0.292625	56.1277	0	C1203	85.19	A6802	5.5	A6802	0.03
High	AQVPFEQIL	43	1	1	Q99828		0	4.56475e+08	0.001	0.01126	43.26	0.0246299	2	1044.57	-0.385054	84.1963	0	C1203	48.15	B1503	26.9	B1503	0.7
High	TASKVIVAV	35	1	1	Q8TEM1		0	4.54981e+08	0.001	0.01106	43.22	0.00704165	2	887.556	0.397477	40.2354	0	C1203	85.19	A6802	18.4	A6802	0.17
High	EIYSESHRV	21	1	1	Q96I51		0	2.55646e+07	0.001	0.007697	42.76	0.0201431	2	1119.54	-0.58718	27.5222	0	C1203	44.44	A6802	15.4	A6802	0.15
High	AGYQHIRMY	6	1	1	Q9BVC4		0	2.00257e+07	0.001	0.006994	42.73	0.0202187	2	1138.55	0.160747	38.3806	0	C1203	51.85	B1503	27.6	C1203	0.5
High	HASDRIIAL	2	1	1	P29401		0	6.02861e+06	0.001	0.007733	42.64	0.0122921	2	995.563	0.10124	39.9442	0	C1203	88.89	C1203	17.5	C1203	0.06
High	EVSKIIKRA	19	1	1	O60502		0	4.85085e+07	0.001	0.008049	42.48	0.00549966	2	1043.66	-0.524589	22.2754	0	C1203	11.11	A6802	263.3	A6802	1.5
High	AQRPTEQEL	10	1	1	Q9ULW3		0	1.31247e+07	0.001	0.006848	42.37	0.0196629	2	1071.54	-0.0625468	29.5517	0	C1203	51.85	B1503	62.6	B1503	1.4
High	AAFEKALEV	20	1	1	Q13325		0	4.68154e+07	0.001	0.006821	41.89	0.0313314	2	977.53	-0.146665	53.2283	0	C1203	92.59	C1203	13.1	C1203	0.04
High	ETFQNSVFV	19	1	1	O00767		0	1.16958e+08	0.001	0.009424	41.84	0.0249482	2	1070.52	-0.260672	71.0949	0	C1203	74.07	A6802	3.4	A6802	0.01
High	EVYAGNFVEV	15	1	1	Q9UBS4		0	2.45447e+07	0.001	0.008442	41.8	0.0262758	2	1126.54	-0.00869475	74.2743	0	C1203	31.43	A6802	6	A6802	0.03
High	DTFYVQVLV	12	1	1	Q5BJD5		0	8.18584e+07	0.001	0.007883	41.7	0.0214284	2	1083.57	0.0644659	96.2028	0	C1203	74.07	A6802	4.7	A6802	0.02
High	MTNDKTAKV	14	1	1	P46013		0	2.23759e+07	0.001	0.009635	41.28	0.0388825	2	1007.52	-0.940226	18.128	0	C1203	70.37	A6802	7.4	A6802	0.05
High	KQFKSEAY	10	1	1	Q03001		0	7.78769e+06	0.001	0.01105	40.9	0.0331879	2	1000.51	-0.282073	22.0495	0	C1203	33.33	B1503	8.8	B1503	0.17
High	EVAPSFGTLL	1	1	1	Q5SRE5		0	3.52264e+07	0.001	0.006309	40.87	0.0355746	2	1033.56	-0.518112	85.837	0	C1203	34.29	A6802	25.3	A6802	0.25
High	KAIATTVTY	20	1	1	O43808		0	79012353	0.001	0.01057	40.62	0.0139971	2	967.545	-1.40466	38.5725	0	C1203	81.48	B1503	5.1	B1503	0.06
High	HGIDPTGTY	27	3	3	P04350;P68371;P07437		0	3.73101e+07	0.001	0.009245	40.01	0.0346152	2	960.442	-0.164648	40.6452	0	C1203	44.44	B1503	42.3	C1203	0.4
High	TVADVDEKA	14	1	1	Q13118		0	1.75237e+07	0.001	0.01114	39.97	0.0396328	2	947.468	-0.26414	26.6754	0	C1203	7.41	A6802	97.2	A6802	0.8
High	MVAPFISQV	5	1	1	Q8N434		0	1.10316e+07	0.001	0.01063	39.79	0.0494492	2	991.528	-0.478832	80.1116	0	C1203	51.85	A6802	2.7	A6802	0.01
High	DVATITKTV	18	1	1	P57740		0	2.50146e+07	0.001	0.008998	39.76	0.023287	2	947.541	0.309178	45.4605	0	C1203	48.15	A6802	20.2	A6802	0.2
High	DVSNPQTVGV	4	1	1	O60493		0	1.83524e+08	0.001	0.009518	39.76	0.0352819	2	1015.5	-0.57202	51.8129	0	C1203	28.57	A6802	45	A6802	0.4
High	TTSHLHQAV	17	1	1	P22695		0	2.02365e+07	0.001	0.007081	39.62	0.045262	2	993.511	-0.270161	19.5376	0	C1203	70.37	A6802	13.2	A6802	0.12
High	KKMDKTAKL	3	1	1	Q9GZR7		0	2.59565e+06	0.001	0.006927	39.28	0.0166543	2	1062.63	-0.422327	16.9996	0	C1203	40.74	B1503	182.5	B1503	3
High	AAFPGASLY	14	1	1	Q15038		0	1.78135e+07	0.001	0.007407	39.19	0.0606434	2	896.451	-0.205138	70.6376	0	C1203	88.89	B1503	5.3	C1203	0.01
High	NAFASVILF	33	1	1	P26641		0	1.14114e+08	0.001	0.007578	38.9	0.0418166	2	981.54	-0.547858	96.9811	0	C1203	77.78	B1503	16.9	C1203	0.2
High	ETFAFQAEI	36	5	5	Q58FF8;Q58FF7;Q14568;P07900;P08238		0	2.04476e+08	0.001	0.007135	38.75	0.051874	2	1055.5	-0.586944	80.2622	0	C1203	66.67	A6802	3	A6802	0.01
High	TVTDVVRFI	5	1	1	Q5VUG0		0	4.79519e+06	0.001	0.006349	38.71	0.0327448	2	1049.6	-0.32478	70.8355	0	C1203	40.74	A6802	34.5	A6802	0.4
High	HAIDRVTTSV	22	1	1	Q9BTT6		0	4.12061e+07	0.001	0.007035	38.66	0.0424158	2	1098.59	-0.20743	33.0954	0	C1203	60	A6802	17.3	A6802	0.15
High	VKLPSGEDY	36	1	1	Q9Y2Z0		0	169607130	0.001	0.01117	38.58	0.0657738	2	1007.5	-0.544401	45.48	0	C1203	48.15	B1503	118.9	B1503	2.5
High	DLMAPQPGV	10	1	1	Q96B49		0	1.89744e+07	0.001	0.009388	38.38	0.047956	2	927.46	-0.586331	64.8215	0	C1203	37.04	A6802	189.8	A6802	1.2
High	VKVVPTVY	17	1	1	Q9Y282		0	2.07419e+07	0.001	0.009342	38.35	0.0242575	2	904.55	-0.114795	47.571	0	C1203	36.67	B1503	272.9	B1503	3.5
High	EVAPAGSQV	23	1	1	O75147		0	4.81819e+07	0.001	0.007769	38.17	0.0616403	2	857.436	-0.194154	34.9974	0	C1203	48.15	A6802	8.1	A6802	0.05
High	NSYGSHRTL	13	1	1	Q9Y446		0	1.42319e+07	0.001	0.009114	38.02	0.0661414	2	1034.5	-0.364561	22.1159	0	C1203	81.48	C1203	59.7	C1203	0.3
High	KQFQSPSTL	17	1	1	Q8NAP3		0	2.1481e+07	0.001	0.008066	37.65	0.0780446	2	1035.55	0.188731	39.1337	0	C1203	48.15	B1503	3.6	B1503	0.03
High	EAASILQEL	20	1	1	O00232		0	3.73892e+07	0.001	0.01017	37.6	0.0714497	2	973.519	-0.662053	79.6735	0	C1203	85.19	A6802	27	A6802	0.25
High	SQYGSQVGY	12	1	1	Q14147		0	1.61141e+07	0.001	0.00749	37.26	0.0379528	2	988.437	-0.372501	44.3732	0	C1203	48.15	B1503	3.5	B1503	0.02
High	TTFESSHYLL	15	1	1	Q16531		0	5.398e+07	0.001	0.007882	37.12	0.0802362	2	1197.58	-1.11324	60.2058	0	C1203	54.29	A6802	17.1	A6802	0.15
High	MTPEIIQKL	70	1	1	Q9UMS4		0	7.78127e+08	0.001	0.0109	37.08	0.0696957	2	1072.61	-1.06905	60.4025	0	C1203	74.07	A6802	29.6	A6802	0.3
High	STAAVFHAV	19	1	1	P57723		0	2.84096e+07	0.001	0.009502	36.95	0.10661	2	902.473	-0.553503	42.5897	0	C1203	70.37	A6802	2.1	A6802	0.01
High	NLYGSPREY	37	1	1	Q9NZM1		0	2.48971e+08	0.001	0.01062	36.79	0.0677341	2	1098.52	-0.722625	41.4994	0	C1203	55.56	B1503	39.1	B1503	1
High	GKIRKDLKY	6	1	1	Q2TAY7		0	8.72992e+06	0.001	0.006695	36.61	0.0126707	2	1120.68	-0.642736	21.9839	0	C1203	40.74	B1503	132.1	B1503	2.5
High	ETIPGPDAKV	25	1	1	Q8TDP1		0	436906892	0.001	0.01024	36.58	0.0571444	2	1026.55	-0.815681	43.2055	0	C1203	48.57	A6802	14.5	A6802	0.12
High	EVSPVSRQSI	24	1	1	Q9H6S3		0	9.08928e+07	0.001	0.009225	36.44	0.105299	2	1101.59	-1.34787	38.2011	0	C1203	20	A6802	63.6	A6802	0.6
High	AKVSGGPSL	3	1	1	Q9Y262		0	7.86924e+06	0.001	0.009139	36.27	0.116832	2	815.462	-0.4313	29.4353	0	C1203	44.44	B1503	26.2	B1503	0.7
High	AASSIQRVL	13	2	2	Q5BKT4;Q5I7T1		0	4.16376e+07	0.001	0.009547	36.27	0.06116	2	944.551	-1.27705	40.9623	0	C1203	92.59	C1203	411.2	C1203	1.5
High	VmAPRTLVL	139	9	9	P01892;P30447;P05534;P18462;P30450;P30456;P30457;P01891;P10316	M2(Oxidation)	0	3.8576e+08	0.001	0.009541	36.24	0.0475725	2	1015.6	-0.496447	55.5935	0	C1203	59.26	B1503	10.1	B1503	0.2
High	KKSDPVVSY	39	1	1	P13639		0	5.50774e+08	0.001	0.007953	36.23	0.0746619	2	1022.55	-0.693702	27.4157	0	C1203	51.85	B1503	9.1	B1503	0.17
High	KGFPHVIYA	18	1	1	Q13485		0	105547964	0.001	0.006998	35.78	0.0910706	2	1031.57	-0.357873	45.0059	0	C1203	18.52	C1203	414.1	C1203	1.5
High	IKADHVSTY	18	1	1	P20036		0	2.31805e+07	0.001	0.008207	35.47	0.144067	2	1033.53	-0.603807	25.7883	0	C1203	51.85	B1503	3.3	B1503	0.02
High	DVFHMVVEV	18	1	1	Q15181		0	2.4323e+08	0.001	0.01108	35.29	0.12996	2	1074.53	-0.38279	82.689	0	C1203	51.85	A6802	14.1	A6802	0.12
High	NSASIFNTL	31	1	1	Q96HU1		0	6.11189e+07	0.001	0.01088	34.93	0.122071	2	966.489	-0.567322	73.9767	0	C1203	77.78	A6802	11.8	A6802	0.1
High	NTIPLFVQL	31	2	2	P35222;P14923		0	2.62075e+08	0.001	0.008903	34.93	0.11349	2	1044.61	0.19633	96.4288	0	C1203	77.78	A6802	11.3	A6802	0.09
High	GKAFSQSSY	16	3	3	Q9UNY5;Q8NF99;Q9NQZ8		0	1.77783e+07	0.001	0.01024	34.83	0.119488	2	974.458	0.0626048	29.7622	0	C1203	40.74	B1503	14.1	B1503	0.4
High	NASEIVKTV	2	1	1	Q9Y3R5		0	6.65876e+06	0.001	0.00769	34.66	0.138006	2	960.536	-0.0874452	37.5335	0	C1203	92.59	A6802	83.5	A6802	0.7
High	DTFSVQVLV	19	1	1	Q96L33		0	1.49452e+08	0.001	0.01108	34.6	0.128882	2	1007.54	0.0484529	89.9337	0	C1203	77.78	A6802	5.2	A6802	0.02
High	GKKLFGEGY	7	1	1	Q92624		0	2.07101e+07	0.001	0.009769	34.32	0.133508	2	998.531	-0.0361763	35.2836	0	C1203	37.04	B1503	308.1	B1503	4
High	DTITPQQVFV	4	1	1	Q9NZW5		0	3.07197e+07	0.001	0.009008	34.21	0.191061	2	1147.6	0.107706	79.3417	0	C1203	45.71	A6802	21.5	A6802	0.2
High	EAIGFATTV	2	1	1	Q8IWV8		0	1.76613e+07	0.001	0.009125	34.11	0.170476	2	908.472	0.0422777	67.6825	0	C1203	81.48	A6802	5	A6802	0.02
High	KLLGPGVNY	5	1	1	P40763		0	8.24259e+06	0.001	0.006731	33.8	0.159828	2	960.552	0.239415	49.279	0	C1203	44.44	B1503	22.5	B1503	0.6
High	GQNKKVMIY	31	2	2	Q14839;Q8TDI0		0	1.49059e+08	0.001	0.01037	33.68	0.104352	2	1080.59	-1.0052	27.3637	0	C1203	40.74	B1503	9.1	B1503	0.17
High	TVADKIHSV	14	1	1	O95147		0	1.98211e+07	0.001	0.008856	33.52	0.12463	2	969.536	-0.427002	29.9574	0	C1203	48.15	A6802	5.1	A6802	0.02
High	HNAGISFSV	32	1	1	P40692		0	1.31686e+08	0.001	0.01086	33.49	0.179891	2	931.463	-0.587481	51.391	0	C1203	44.44	A6802	23	A6802	0.25
High	RQAKEERTF	4	1	1	P35579		0	2.99667e+06	0.001	0.00709	33.47	0.166261	2	1164.61	-0.0560055	18.0855	0	C1203	40.74	B1503	5.3	B1503	0.06
High	FTADVRSVL	30	1	1	O95476		0	6.69268e+07	0.001	0.01072	33.38	0.162969	2	1007.55	-0.506207	61.2147	0	C1203	81.48	C1203	5.9	C1203	0.01
High	RKVPGVTAI	28	3	3	Q06787;P51114;P51116		0	80419467	0.001	0.008893	33.35	0.0423079	2	940.594	-0.218768	34.5185	0	C1203	40.74	B1503	21.4	B1503	0.6
High	EVMMLTERV	14	1	1	Q9H0S4		0	3.64811e+07	0.001	0.006896	33.34	0.189596	2	1107.55	-0.434331	57.4214	0	C1203	37.04	A6802	6.1	A6802	0.03
High	FSFPGELLM	31	2	2	P43003;P48664		0	6.82964e+07	0.001	0.01019	33.32	0.174478	2	1040.51	-0.525724	100.014	0	C1203	77.78	C1203	6.2	C1203	0.01
High	EVADFLIKA	18	2	2	Q8IWZ3;O75179		0	1.47498e+08	0.001	0.008359	33.29	0.170882	2	1005.56	0.171886	65.6864	0	C1203	11.11	A6802	5.8	A6802	0.03
High	KGYPSEFSTY	6	1	1	P49674		0	1.3757e+07	0.001	0.008864	33.11	0.134917	2	1178.54	-0.437008	49.3147	0	C1203	34.29	B1503	32.2	B1503	0.8
High	STVEVIFHV	5	2	2	Q6GYQ0;Q2PPJ7		0	2.28605e+07	0.001	0.00703	33.05	0.277056	2	1030.56	-0.237878	67.7458	0	C1203	74.07	A6802	2.6	A6802	0.01
High	SAYDHVRKT	7	1	1	P27361		0	7.03536e+06	0.001	0.009149	32.99	0.217414	2	1076.55	0.137674	18.6016	0	C1203	51.85	C1203	264.8	C1203	1.1
High	DLIHEIYTV	6	1	1	P18124		0	2.48247e+07	0.001	0.01113	32.97	0.240067	2	1102.58	-0.224005	80.9988	0	C1203	44.44	A6802	154.3	A6802	1.1
High	STFGYVHGV	31	1	1	P38606		0	1.05961e+08	0.001	0.007719	32.91	0.182696	2	966.468	-0.29213	48.8729	0	C1203	77.78	A6802	2.4	A6802	0.01
High	EVFALIHEL	5	1	1	Q12766		0	1.44426e+07	0.001	0.008975	32.74	0.172403	2	1070.59	-0.285027	79.0218	0	C1203	48.15	A6802	7.1	A6802	0.04
High	TAFSRLILI	8	1	1	Q6P2Q9		0	1.32382e+07	0.001	0.009267	32.48	0.0402235	2	1033.64	0.175398	77.6879	0	C1203	77.78	C1203	21.7	C1203	0.08
High	THRSGQGAF	7	1	1	P36578		0	3.08289e+06	0.001	0.01098	32.44	0.241151	2	960.464	-0.311586	18.3861	0	C1203	33.33	B1503	73.8	B1503	1.5
High	HAAHIISEL	37	1	1	Q96I24		0	1.96231e+08	0.001	0.009679	32.42	0.23562	2	990.536	-0.566248	37.5892	0	C1203	85.19	C1203	13.2	C1203	0.04
High	LAAYHPWVV	27	1	1	Q5TA50		0	7.51554e+07	0.001	0.009862	32.32	0.128188	2	1055.57	-0.581025	63.1826	0	C1203	85.19	C1203	54.8	C1203	0.25
High	AAATSVHVV	18	1	1	Q68EM7		0	2.0504e+07	0.001	0.007433	32.3	0.176182	2	854.473	-0.0845848	32.1127	0	C1203	88.89	C1203	118.5	C1203	0.6
High	EVISKLYAV	101	1	1	P50990		0	3.46567e+09	0.001	0.01099	32.27	0.081794	2	1021.59	-0.696609	56.8191	0	C1203	40.74	A6802	3	A6802	0.01
High	MARETWEVL	11	1	1	Q86X10		0	1.33559e+07	0.001	0.008483	31.98	0.266289	2	1134.56	-0.0585907	61.0388	0	C1203	81.48	C1203	56	C1203	0.25
High	AAISHGRVF	13	1	1	Q9NRX2		0	1.32736e+07	0.001	0.007937	31.95	0.236668	2	957.526	-0.557436	30.341	0	C1203	81.48	B1503	6.2	B1503	0.09
High	ESIDIITRA	13	1	1	Q16531		0	9.11107e+07	0.001	0.009488	31.82	0.273191	2	1017.56	-0.368328	52.4883	0	C1203	37.04	A6802	12.9	A6802	0.12
High	TTIDVRTTF	12	1	1	Q8IY21		0	3.65105e+07	0.001	0.009298	31.73	0.216435	2	1053.56	0.348938	55.5412	0	C1203	66.67	C1203	46.1	C1203	0.25
High	EVYEKPVQV	28	1	1	Q9Y508		0	3.59992e+08	0.001	0.00642	31.67	0.327144	2	1090.58	-1.01916	41.7347	0	C1203	51.85	A6802	15.2	A6802	0.15
High	VHAPPMQLGF	12	1	1	O95235		0	1.30895e+07	0.001	0.007734	31.63	0.221477	2	1096.56	-0.586413	63.5801	0	C1203	40	B1503	121.2	B1503	2.5
High	EVIGGTNHTL	16	1	1	Q9P2E3		0	4.76796e+07	0.001	0.00654	31.62	0.200604	2	1040.54	-1.62735	38.3297	0	C1203	40	A6802	51.4	A6802	0.5
High	GKAFSRISY	4	2	2	Q8WV37;Q3KP31		0	9.70151e+06	0.001	0.008494	31.5	0.23748	2	1028.55	-0.92567	34.2614	0	C1203	44.44	B1503	12.6	B1503	0.3
High	AKVKATTSL	6	1	1	A9YTQ3		0	5.81793e+06	0.001	0.009899	31.45	0.0819984	2	918.562	-0.0273122	22.1434	0	C1203	40.74	B1503	25	B1503	0.6
High	AQAASQHVF	8	1	1	Q9NQT4		0	1.6217e+07	0.001	0.011	31.11	0.254217	2	958.474	0.155938	30.5547	0	C1203	40.74	B1503	3	B1503	0.01
High	HVSHILQKA	1	1	1	P07093		0	2.4173e+06	0.001	0.007856	31.06	0.165891	2	1032.59	-0.497146	21.2107	0	C1203	3.7	A6802	204.8	A6802	1.3
High	HQFLQNEY	19	1	1	Q16531		0	5.17738e+07	0.001	0.00962	31.03	0.227073	2	1078.5	-0.193403	44.4771	0	C1203	43.33	B1503	24.1	B1503	0.6
High	SKKPESTSF	20	1	1	Q9BT25		0	2.60895e+07	0.001	0.008657	30.88	0.248159	2	1010.51	-0.69895	20.452	0	C1203	37.04	B1503	11.3	B1503	0.25
High	KKAQAQPVM	10	1	1	P24539		0	5.1635e+06	0.001	0.01078	30.84	0.19326	2	1000.56	-0.21567	19.5613	0	C1203	37.04	B1503	16.5	B1503	0.4
High	GKSTSIQSF	21	1	1	P13797		0	3.23761e+07	0.001	0.007219	30.74	0.269488	2	954.489	-0.254728	33.3982	0	C1203	37.04	B1503	11.3	B1503	0.25
High	GKLKPTMAF	6	1	1	Q6YN16		0	2.99967e+07	0.001	0.01001	30.65	0.168712	2	992.559	-1.11723	38.3776	0	C1203	29.63	B1503	7.2	B1503	0.12
High	MTALVNVAL	2	2	2	Q8WVM7;Q8N3U4		0	2.86582e+07	0.001	0.006727	30.43	0.344722	2	931.528	-0.051023	80.7285	0	C1203	74.07	A6802	4.6	A6802	0.01
High	VTYVPVTTF	7	1	1	P62899		0	3.40679e+07	0.001	0.01058	30.25	0.261788	2	1026.55	-0.302696	76.7068	0	C1203	74.07	B1503	14.3	C1203	0.3
High	HKRIHGVGF	19	1	1	P62899		0	2.6042e+07	0.001	0.009131	30.08	0.237632	2	1050.6	-0.322539	24.0553	0	C1203	33.33	B1503	23.9	B1503	0.6
High	NIPSFIVRL	19	1	1	P46781		0	2.96416e+07	0.001	0.01104	29.85	0.194503	2	1058.64	-0.184818	77.8093	0	C1203	48.15	A6802	74.4	A6802	0.6
High	TKAKNVSSY	3	1	1	Q9UNF0		0	1.86032e+06	0.001	0.01073	29.8	0.343301	2	997.531	-0.197294	18.1105	0	C1203	44.44	B1503	12.4	B1503	0.3
High	ETYFESARV	15	1	1	Q9H3L0		0	2.19814e+07	0.001	0.008454	29.42	0.361778	2	1101.52	-0.20851	49.0372	0	C1203	70.37	A6802	4.3	A6802	0.01
High	IKKDVDEAY	10	1	1	P05787		0	5.46117e+06	0.001	0.007646	29.04	0.477124	2	1080.56	-0.59705	26.7725	0	C1203	40.74	B1503	63.6	B1503	1.4
High	ELADIKQAYL	11	1	1	Q8WXX5		0	1.52937e+07	0.001	0.00948	28.79	0.473949	2	1163.63	-0.356366	61.4459	0	C1203	34.29	A6802	31.1	A6802	0.3
High	ETMNNIDRL	17	1	1	Q5T0N5		0	8.45847e+07	0.001	0.009489	28.71	0.51358	2	1105.53	-0.666173	46.5715	0	C1203	70.37	A6802	45.3	A6802	0.4
High	KHMTVKNKY	3	1	1	P14635		0	3.13038e+06	0.001	0.009633	28.67	0.372653	2	1148.62	-0.170746	17.3823	0	C1203	37.04	B1503	101.8	B1503	1.9
High	RQADFVQVL	27	1	1	Q9Y2V7		0	1.36051e+08	0.001	0.007305	28.31	0.519375	2	1075.59	-0.223415	58.4086	0	C1203	51.85	B1503	4.2	B1503	0.03
High	ETFEHPNVV	38	1	1	Q00534		0	5.17804e+08	0.001	0.009835	28.13	0.507822	2	1071.51	0.18524	46.8856	0	C1203	81.48	A6802	8.4	A6802	0.06
High	AAYYHPSYL	19	1	1	Q14687		0	5.8739e+07	0.001	0.01038	28.08	0.432792	2	1084.51	-0.345121	51.3466	0	C1203	85.19	C1203	6.4	C1203	0.01
High	EIFSKNYRV	17	1	1	Q9NVU0		0	1.00106e+08	0.001	0.009569	27.59	0.61059	2	1155.61	-1.22523	41.0039	0	C1203	44.44	A6802	8.7	A6802	0.06
High	KKNKDNVKF	10	1	1	P63173		0	1.20321e+07	0.001	0.01102	27.45	0.323707	2	1120.65	-0.313252	16.6729	0	C1203	33.33	B1503	66.5	B1503	1.4
High	EAAGIMENI	27	1	1	O60341		0	6.82476e+07	0.001	0.006525	27.41	0.735102	2	947.45	-0.275998	64.3092	0	C1203	74.07	A6802	6.1	A6802	0.03
High	YTTTIEAFI	8	1	1	P07814		0	40854644	0.001	0.008093	27.14	0.691065	2	1058.54	-0.488134	84.5497	0	C1203	62.96	A6802	6	A6802	0.03
High	KASEWVQQV	11	1	1	P49588		0	3.25509e+07	0.001	0.01108	27.12	0.906006	2	1074.56	-0.769494	43.4417	0	C1203	85.19	C1203	99.9	C1203	0.5
High	LQHPNIVGY	6	1	1	Q9BQI3		0	3.77951e+07	0.001	0.006828	27.02	0.649056	2	1040.55	0.150433	48.8607	0	C1203	51.85	B1503	3	B1503	0.01
High	TVFDEAIRA	11	3	3	P63000;P15153;P60763		0	2.33896e+07	0.001	0.007467	27.01	0.948158	2	1021.53	-0.281775	55.4974	0	C1203	11.11	A6802	144.3	A6802	1
High	EVIDFSHGL	85	3	3	Q96GS6;Q5VST6;Q6PCB6		0	1.79971e+09	0.001	0.006738	26.81	0.931976	2	1016.5	-0.453751	66.3836	0	C1203	40.74	A6802	3.3	A6802	0.01
High	YAFPKSITV	39	1	1	P53985		0	3.38087e+08	0.001	0.008214	26.79	0.585723	2	1025.57	-1.01597	62.3664	0	C1203	96.3	C1203	2.7	C1203	0.01
High	RQIKHMIKY	11	1	1	O15258		0	1.05281e+07	0.001	0.008917	26.79	0.539234	3	1216.7	0.314625	24.2157	0	C1203	40.74	B1503	3.4	B1503	0.02
High	GKYIPKQSF	9	1	1	Q9P0I2		0	4.70707e+07	0.001	0.011	26.2	0.705017	2	1067.59	-0.699911	33.2262	0	C1203	33.33	B1503	17.8	B1503	0.5
High	GKVGAHAGEY	6	1	1	P69905		0	1.90748e+06	0.001	0.01097	26.19	0.899953	2	988.484	-0.353811	20.2229	0	C1203	31.43	B1503	121.5	B1503	2.5
High	YSYWTKNGV	1	1	1	Q9Y639		0	1.13179e+07	0.001	0.007318	26.1	0.747582	2	1117.53	-0.658705	48.4112	0	C1203	74.07	A6802	11.6	A6802	0.09
High	EIFDGNVAHI	13	1	1	P46939		0	4.41701e+07	0.001	0.007509	25.89	0.974622	2	1114.55	-0.236388	62.5776	0	C1203	31.43	A6802	25.5	A6802	0.25
High	EVMKYITSL	15	1	1	P11586		0	37000357	0.001	0.006507	25.69	0.824429	2	1083.58	-0.351115	65.1257	0	C1203	40.74	A6802	16.6	A6802	0.15
High	EAAEVILRV	51	1	1	P78371		0	2.9724e+09	0.001	0.01121	25.63	0.703374	2	999.583	-0.0817822	58.0755	0	C1203	88.89	A6802	7.3	A6802	0.05
High	EVIEKFDYV	20	1	1	Q92871		0	4.96908e+07	0.001	0.0106	25.6	0.87309	2	1141.58	-0.149901	60.8978	0	C1203	40.74	A6802	2.9	A6802	0.01
High	FAYPNRPDVL	33	1	1	Q03518		0	1.15784e+08	0.001	0.01119	25.55	1.1515	2	1191.62	-0.581955	59.865	0	C1203	80	C1203	21.8	C1203	0.08
High	IKKNNPRKY	4	2	2	P67809;P16989		0	9.13055e+06	0.001	0.008688	25.41	0.350899	2	1160.69	0.0841784	16.1106	0	C1203	44.44	B1503	253.6	B1503	3.5
High	SKLPSSIEY	17	1	1	Q15386		0	3.57243e+07	0.001	0.01052	25.21	0.851927	2	1023.54	-0.515323	47.2594	0	C1203	51.85	B1503	11.5	B1503	0.25
High	HSVYIPNKV	28	1	1	Q8TB22		0	6.19658e+07	0.001	0.01052	24.79	1.0068	2	1056.58	-0.245771	36.7339	0	C1203	70.37	A6802	20	A6802	0.17
High	TVFEHTFHV	28	1	1	P41250		0	1.21212e+08	0.001	0.00772	23.88	1.29858	2	1116.55	-0.120515	49.3148	0	C1203	44.44	A6802	2.4	A6802	0.01
High	GKAFSQKQY	5	1	1	Q15072		0	4.08764e+06	0.001	0.007505	23.85	1.53651	2	1056.55	-0.589507	21.9151	0	C1203	44.44	B1503	99.7	B1503	1.9
High	RTTEINFKV	19	2	2	P29762;P29373		0	3.62199e+07	0.001	0.008706	23.65	1.30383	2	1107.61	-1.06693	41.8667	0	C1203	70.37	A6802	74.6	A6802	0.6
High	GKYGTLQEF	2	1	1	O75182		0	4.71705e+07	0.001	0.009253	23.26	1.74522	2	1042.52	-0.573908	49.9727	0	C1203	40.74	B1503	7.4	B1503	0.12
High	RQLPGSQRY	5	1	1	Q96BD0		0	6.57575e+06	0.001	0.009927	23.07	1.97689	2	1104.59	-0.472275	27.0307	0	C1203	44.44	B1503	3.1	B1503	0.01
High	KALSRLISF	6	1	1	Q8N8L2		0	4.69831e+07	0.001	0.009759	22.11	0.479838	2	1034.64	-0.0711207	59.0228	0	C1203	74.07	B1503	8.8	B1503	0.17
High	RQSPHSNLF	4	1	1	O43929		0	4.32238e+06	0.001	0.008366	21.74	2.47991	2	1085.55	-0.401574	28.7617	0	C1203	40.74	B1503	2.1	B1503	0.01
High	ETFEKTPVEV	24	1	1	Q15149		0	7.661e+07	0.001	0.01074	21.31	3.07269	2	1178.59	-0.172834	49.3523	0	C1203	57.14	A6802	7.4	A6802	0.05
High	KKIRDTQKY	3	1	1	Q9GZR2		0	3.01986e+06	0.001	0.00701	20.97	1.19215	2	1179.68	-0.0826741	16.9763	0	C1203	37.04	B1503	66.7	B1503	1.4
High	RKYHQRPTF	6	1	1	O75369		0	1.47886e+07	0.001	0.01083	20.66	3.32095	3	1232.66	-0.465344	20.9686	0	C1203	37.04	B1503	5.6	B1503	0.07
High	FTAKVWDAV	8	1	1	Q9Y3F4		0	2.26866e+07	0.001	0.007499	20.39	4.25337	2	1036.55	-0.421915	60.6542	0	C1203	74.07	A6802	3.4	A6802	0.01
High	HQKLGIAY	13	1	1	Q9HB58		0	2.98549e+07	0.001	0.01091	20.35	3.36739	2	929.52	-0.699696	33.9516	0	C1203	36.67	B1503	32.3	B1503	0.8
High	GQHSHVVRY	4	1	1	P30291		0	1.94766e+06	0.001	0.009309	20.08	3.3188	2	1082.55	-0.472761	19.1826	0	C1203	48.15	B1503	4.3	B1503	0.04
High	QTVDIRAQL	14	1	1	Q96C10		0	6.07295e+07	0.001	0.007601	19.99	3.89446	2	1043.58	-0.616593	51.4734	0	C1203	70.37	A6802	13.7	A6802	0.12
High	MAATGVKEL	1	1	1	Q96RL7		0	4.08431e+06	0.001	0.01091	19.95	5.07155	2	919.491	-0.380274	37.0139	0	C1203	88.89	C1203	42.6	C1203	0.2
High	KQFEKQVEL	8	1	1	Q14204		0	2.33199e+07	0.001	0.008098	19.64	3.74002	2	1148.63	-0.125651	34.3734	0	C1203	51.85	B1503	12.1	B1503	0.3
High	RKNPVTSTY	32	1	1	Q13131		0	9.70359e+07	0.001	0.006726	19.51	3.8615	2	1065.57	-1.01988	23.8531	0	C1203	48.15	B1503	5.4	B1503	0.06
High	IKISNPTEF	15	1	1	Q9BXS6		0	7.18931e+07	0.001	0.01089	19.43	5.5171	2	1048.57	-1.35016	53.8442	0	C1203	40.74	B1503	5	B1503	0.05
High	RKVYNISEF	17	1	1	O60427		0	3.68188e+07	0.001	0.008348	19.42	4.00865	2	1155.61	-1.01396	44.2627	0	C1203	37.04	B1503	4.8	B1503	0.05
High	QAYPEVRIV	22	1	1	Q08211		0	8.23798e+07	0.001	0.009588	19.23	4.66491	2	1074.59	-0.0907229	55.3423	0	C1203	92.59	C1203	79.9	C1203	0.4
High	KKIEDLIKY	1	1	1	O75935		0	1.86261e+07	0.001	0.009837	19.09	1.06972	2	1149.69	-0.0344099	44.235	0	C1203	44.44	B1503	30.6	B1503	0.8
High	YKEDHPFEY	3	1	1	Q9H0R8		0	1.61049e+07	0.001	0.009039	18.75	2.25432	2	1227.53	-0.129985	41.2862	0	C1203	51.85	B1503	78.6	B1503	1.6
High	HQKKEFVKY	16	1	1	Q9BUL8		0	1.35845e+07	0.001	0.008746	18.51	3.92416	3	1206.66	0.073154	20.5765	0	C1203	40.74	B1503	10	B1503	0.2
High	YQSPVRVY	7	2	2	Q92503;O43304		0	2.41753e+07	0.001	0.01082	18.49	5.27029	2	1011.53	0.0436665	46.993	0	C1203	43.33	B1503	6.1	B1503	0.08
High	ETFKNEHKV	3	1	1	Q6UWY0		0	1.99923e+06	0.001	0.009695	18.05	6.64459	2	1131.58	-0.0619209	19.0835	0	C1203	70.37	A6802	14.2	A6802	0.12
High	YASSKLLKI	9	1	1	O95067		0	2.10337e+07	0.001	0.009651	17.63	1.48595	2	1022.62	-0.70939	42.3006	0	C1203	81.48	C1203	22.7	C1203	0.09
High	HTFYNELRV	14	10	10	Q562R1;Q9BYX7;P60709;P68032;P63261;P68133;Q6S8J3;A5A3E0;P0CG38;P0CG39		0	6.55013e+07	0.001	0.01076	17.15	7.77756	2	1178.59	-0.455745	48.3966	0	C1203	74.07	A6802	11.1	A6802	0.09
High	KKFSDSVKSTF	9	1	1	Q9ULG6		0	7.252e+07	0.001	0.009865	16.58	9.37607	3	1273.68	-0.0370936	31.8203	0		0	B1503	37.2	B1503	0.9
High	ETFKNSFVEA	10	1	1	Q6NUM9		0	1.63196e+08	0.001	0.009915	16.45	7.63865	2	1171.56	0.00390931	50.112	0	C1203	25.71	A6802	14.4	A6802	0.12
High	EVMKIKAEI	7	1	1	Q96AT1		0	2.49389e+07	0.001	0.01018	15.54	8.00622	2	1060.61	0.405658	42.8091	0	C1203	33.33	A6802	18.1	A6802	0.17
High	YSYPELVKM	12	1	1	Q96MH7		0	18944776	0.001	0.008113	14.23	16.7793	2	1129.56	-1.60266	64.4726	0	C1203	77.78	C1203	7.5	C1203	0.01
High	KLKEFVDYY	2	1	1	O75151		0	4.14829e+07	0.001	0.009327	13.02	21.3997	2	1204.62	0.0367155	65.9788	0	C1203	44.44	B1503	47.1	B1503	1.1
High	RHKFPDEDSY	11	1	1	Q6VY07		0	1.36884e+07	0.001	0.008091	10.38	23.3132	3	1293.59	-0.331208	29.7701	0	C1203	37.14	B1503	87.6	B1503	1.7
High	MATPLLMQA	21	1	1	P04233		0	2.5737e+07	0.002	0.01174	52.59	0.00260697	2	975.5	-0.146249	73.0847	0	C1203	44.44	A6802	113.4	C1203	0.6
High	NSSQVVVAV	58	1	1	Q16531		0	1.07289e+09	0.002	0.01158	49.07	0.00548725	2	902.494	-0.769494	50.8021	0	C1203	77.78	A6802	13.7	A6802	0.12
High	LVASVRVPA	35	1	1	P42126		0	1.23545e+08	0.002	0.01153	47.5	0.00165113	2	911.567	-0.560837	45.5127	0	C1203	11.11	A6802	29.4	A6802	0.3
High	SIAQIIVTV	3	1	1	Q9UNQ0		0	5.61284e+07	0.002	0.01173	47.23	0.00335323	2	943.582	-0.300436	83.3524	0	C1203	51.85	A6802	23.4	A6802	0.25
High	GKAPGAEEY	24	1	1	P09543		0	5.73533e+07	0.002	0.01257	46.07	0.0128394	2	921.431	-0.287013	25.8967	0	C1203	51.85	B1503	62.4	B1503	1.4
High	TAFPKPLLT	19	1	1	Q9BZG8		0	54208536	0.002	0.01271	44.13	0.012186	2	987.587	-0.18783	57.5852	0	C1203	55.56	C1203	345.5	C1203	1.3
High	DTSSLFDKL	24	1	1	Q16665		0	42895352	0.002	0.01215	40.98	0.0262061	2	1025.51	-0.426453	69.4483	0	C1203	74.07	A6802	101.8	A6802	0.8
High	AAFAYTVKY	20	1	1	Q8N2K1		0	347931108	0.002	0.01228	40.32	0.0449852	2	1033.54	0.112903	55.154	0	C1203	85.19	B1503	6.5	B1503	0.1
High	GKYASIILF	17	1	1	Q8TCB0		0	5.20284e+07	0.002	0.01243	40.02	0.0194005	2	1011.59	-0.475168	72.4757	0	C1203	40.74	B1503	5.6	B1503	0.07
High	AAADVLEFV	10	1	1	P53618		0	1.89514e+07	0.002	0.01459	39.82	0.0538461	2	934.488	-0.257609	85.7241	0	C1203	85.19	A6802	15.8	A6802	0.15
High	EAMKQILGV	24	1	1	Q14444		0	1.38105e+08	0.002	0.01243	39.54	0.0440301	2	988.549	-0.218765	56.2583	0	C1203	81.48	A6802	13.4	A6802	0.12
High	AKGPTLTVY	8	1	1	Q13616		0	3.13775e+07	0.002	0.01468	38.99	0.0402334	2	949.535	-0.273314	44.567	0	C1203	51.85	B1503	9.8	B1503	0.2
High	DTSPVFQRL	22	1	1	Q9NU22		0	3.74057e+07	0.002	0.01205	37.88	0.0754364	2	1062.56	-0.893068	57.2278	0	C1203	77.78	A6802	39.1	A6802	0.4
High	RAYPAAITI	21	1	1	O95071		0	1.80814e+08	0.002	0.01461	37.41	0.0547378	2	975.562	-0.551675	53.707	0	C1203	85.19	C1203	9.5	C1203	0.02
High	EIVDFAKQV	5	1	1	P55055		0	1.04442e+07	0.002	0.0118	37.05	0.0886012	2	1048.57	-0.311949	58.7632	0	C1203	44.44	A6802	27.9	A6802	0.3
High	ESADIARAEV	6	1	1	A6NKF1		0	2.79473e+07	0.002	0.01232	36.76	0.0891317	2	1060.53	-0.888922	39.2659	0	C1203	51.43	A6802	5.7	A6802	0.03
High	TAYPQVVVV	32	1	1	Q9ULI2		0	1.51523e+08	0.002	0.01438	36.16	0.103257	2	975.551	-0.479347	69.2964	0	C1203	96.3	C1203	11.6	C1203	0.03
High	DTAPVIIFV	25	1	1	Q7Z2Z2		0	9.69204e+07	0.002	0.01178	35.62	0.100259	2	974.555	-0.30145	97.8197	0	C1203	85.19	A6802	2.7	A6802	0.01
High	ETAQAIKGMHI	29	1	1	P18621		0	1.82466e+08	0.002	0.01463	35.31	0.0906587	2	1198.62	-0.208499	42.521	0		0	A6802	475	A6802	2.5
High	EASYLITSV	19	1	1	O60488		0	2.68734e+08	0.002	0.01348	35.25	0.0719477	2	982.509	-0.53714	69.8454	0	C1203	81.48	A6802	7	A6802	0.04
High	ETFPANIQV	57	1	1	Q5VYK3		0	1.1475e+09	0.002	0.01187	35.17	0.176052	2	1018.52	-0.59725	71.7054	0	C1203	81.48	A6802	3.5	A6802	0.01
High	TTFESSHYL	24	1	1	Q16531		0	7.19772e+07	0.002	0.01281	34.25	0.117825	2	1084.49	-0.249892	49.0645	0	C1203	74.07	A6802	4.6	A6802	0.01
High	KAISGVHTV	21	2	2	Q2VIR3;P41091		0	9.71181e+07	0.002	0.01168	34.22	0.0737017	2	911.531	-0.468617	23.6911	0	C1203	85.19	C1203	29.8	C1203	0.12
High	EVHVQEETV	13	1	1	Q53GL7		0	4.31164e+07	0.002	0.01284	34.19	0.115768	2	1069.52	-0.372787	35.2178	0	C1203	40.74	A6802	238.3	A6802	1.4
High	GKRIGVFSY	31	1	1	Q01581		0	9.70048e+07	0.002	0.01371	34.16	0.0901904	2	1026.57	-0.321258	45.2164	0	C1203	40.74	B1503	23.4	B1503	0.6
High	EVYGSVAKV	32	1	1	Q07864		0	1.79056e+08	0.002	0.01217	34.07	0.123066	2	951.514	-0.488254	39.558	0	C1203	48.15	A6802	6.4	A6802	0.04
High	NVAEINRQV	16	1	1	O43933		0	2.91853e+07	0.002	0.01307	34.02	0.124669	2	1042.56	-0.954782	35.2587	0	C1203	48.15	A6802	10.3	A6802	0.08
High	HTVGFILQL	8	1	1	Q5SRE5		0	1.09233e+08	0.002	0.01203	33.86	0.103055	2	1027.59	-0.334814	77.8318	0	C1203	77.78	A6802	18.5	A6802	0.17
High	KQLAEYRKY	10	1	1	O94955		0	9.22242e+06	0.002	0.01215	33.61	0.120397	3	1198.66	-0.390003	23.9463	0	C1203	40.74	B1503	5.7	B1503	0.07
High	EVIPNSNFYV	5	1	1	Q9NTJ3		0	2.80786e+07	0.002	0.01225	33.53	0.188024	2	1181.58	-0.382324	76.3812	0	C1203	25.71	A6802	4.2	A6802	0.01
High	DVYDKVDYL	10	1	1	Q14254		0	4.92276e+07	0.002	0.01319	33.51	0.133274	2	1129.54	0.6254	64.1138	0	C1203	48.15	A6802	48.3	A6802	0.5
High	TKQPIPAAY	6	1	1	Q6P1J9		0	1.28939e+07	0.002	0.01441	33.18	0.259413	2	988.545	-1.53353	38.4316	0	C1203	48.15	B1503	21.6	B1503	0.6
High	AATEIVERV	28	1	1	Q9UID3		0	5.70925e+07	0.002	0.01266	32.37	0.256079	2	987.546	-0.625811	41.7327	0	C1203	85.19	A6802	351.2	A6802	1.8
High	SVSAVIVRA	1	1	1	Q68CR1		0	2.88983e+07	0.002	0.01366	31.93	0.143342	2	901.545	-1.39274	42.9752	0	C1203	11.11	A6802	59.7	A6802	0.6
High	EVYVGDERV	17	1	1	O14976		0	3.34161e+07	0.002	0.01366	31.75	0.292902	2	1065.52	-0.339504	42.5577	0	C1203	40.74	A6802	22.5	A6802	0.25
High	KQQQPPTVY	1	1	1	Q9Y6J0		0	4.81158e+06	0.002	0.01135	31.48	0.366026	2	1088.57	-1.10059	32.8745	0	C1203	44.44	B1503	3.2	B1503	0.02
High	SQANIAQVL	1	2	2	Q10567;P63010		0	9.86307e+06	0.002	0.01468	30.64	0.351836	2	943.521	-0.153525	61.6834	0	C1203	44.44	B1503	9.8	B1503	0.2
High	RQLPSSHAL	12	1	1	Q8WV83		0	1.90913e+07	0.002	0.01257	29.88	0.249191	2	1008.56	-0.627007	27.493	0	C1203	44.44	B1503	5.1	B1503	0.06
High	SKIKNALAH	2	1	1	P00846		0	2.3398e+06	0.002	0.01214	29.73	0.120567	2	981.584	-0.248035	19.7013	0	C1203	3.7	B1503	417.9	B1503	4.5
High	GKVTGDTVY	20	1	1	Q6UX04		0	2.38032e+07	0.002	0.01317	29.65	0.307131	2	939.478	-0.0908189	30.0962	0	C1203	40.74	B1503	16.6	B1503	0.4
High	YTFFTPNNI	33	1	1	P17844		0	7.39898e+08	0.002	0.01379	28.57	0.460769	2	1116.54	-0.549298	81.8901	0	C1203	70.37	A6802	11.5	C1203	0.04
High	EAVSVIQSI	12	1	1	Q9P035		0	8.03978e+07	0.002	0.01336	28.49	0.563769	2	945.525	-0.309238	68.233	0	C1203	74.07	A6802	29.9	A6802	0.3
High	GQLPGLHEY	13	1	1	Q8TAT6		0	4.72904e+07	0.002	0.0117	28.34	0.542546	2	1013.5	-0.590165	49.2629	0	C1203	48.15	B1503	6.7	B1503	0.12
High	MSYAEVMRL	1	1	1	O43681		0	5.2228e+06	0.002	0.01153	28.23	0.49025	2	1099.53	-0.673292	66.4311	0	C1203	74.07	C1203	11.7	C1203	0.03
High	RKKDGQVTF	10	1	1	Q9BW60		0	2.09521e+07	0.002	0.01357	28.13	0.390845	2	1078.6	-0.482279	20.1892	0	C1203	40.74	B1503	13.9	B1503	0.4
High	KKVETNMAF	5	1	1	P05155		0	7.02648e+06	0.002	0.01455	27.66	0.597828	2	1067.56	-0.327843	31.3442	0	C1203	33.33	B1503	3.4	B1503	0.02
High	GKWPSSQQY	9	1	1	Q8TD26		0	1.24733e+07	0.002	0.01308	27.5	0.590211	2	1080.51	-0.451384	37.7676	0	C1203	44.44	B1503	17.8	B1503	0.5
High	EVFDEKIEV	10	1	1	Q02952		0	4.43485e+07	0.002	0.0121	27.5	0.570739	2	1107.56	-0.844651	60.6885	0	C1203	51.85	A6802	10.1	A6802	0.08
High	GKKVEGTAF	1	1	1	P01024		0	6.41681e+06	0.002	0.01415	26.74	0.722573	2	936.514	-0.609109	23.0602	0	C1203	29.63	B1503	42.1	B1503	1
High	TKVGPNATY	1	1	1	Q9Y5V3		0	1.18241e+07	0.002	0.01361	26.15	1.14439	2	950.494	-0.270614	29.9906	0	C1203	44.44	B1503	16.5	B1503	0.4
High	GKREGIDQSY	11	1	1	O94952		0	6.94678e+06	0.002	0.01278	25.9	0.936267	2	1152.56	-0.142913	24.4218	0	C1203	40	B1503	173	B1503	3
High	RAAPFSLEY	18	1	1	Q15181		0	2.80004e+07	0.002	0.01325	25.71	1.05668	2	1053.54	-0.682625	59.0972	0	C1203	92.59	B1503	4	B1503	0.03
High	GQRKPATSY	56	1	1	P46779		0	7.68269e+08	0.002	0.0136	25.44	1.10846	2	1007.53	-0.240562	19.151	0	C1203	37.04	B1503	5	B1503	0.05
High	WAYPRQVFI	4	1	1	Q9P2D0		0	2.22207e+07	0.002	0.01362	25.22	1.40369	2	1179.63	0.0404737	71.817	0	C1203	81.48	C1203	7.8	C1203	0.01
High	NTCPYVHNI	56	1	1	Q9Y2Y1		0	5.97956e+08	0.002	0.0136	24.8	0.85763	2	1060.49	-0.0930347	46.0808	0	C1203	70.37	A6802	42.1	A6802	0.4
High	RKVKNSQSF	9	1	1	P54920		0	7.78897e+06	0.002	0.01149	24.76	0.750268	2	1093.61	0.393773	17.4421	0	C1203	29.63	B1503	5.1	B1503	0.06
High	AKKKANLQY	5	1	1	P17980		0	6.04639e+06	0.002	0.01338	24.48	0.563906	2	1063.63	0.0101454	18.3921	0	C1203	44.44	B1503	39.4	B1503	1
High	EIFDKIHSL	12	1	1	Q53GS7		0	3.95964e+07	0.002	0.01425	24.33	1.76759	2	1101.59	-0.0105583	55.722	0	C1203	48.15	A6802	17.8	A6802	0.17
High	HTIYPKDSV	17	1	1	Q9NZP8		0	2.30752e+07	0.002	0.01176	24.25	1.96807	2	1059.55	-0.497366	28.9811	0	C1203	66.67	A6802	9.3	A6802	0.07
High	RKPCSVTSY	3	1	1	P37088		0	1.05321e+07	0.002	0.01301	23.91	1.22949	2	1040.52	-0.0351669	25.3276	0	C1203	40.74	B1503	14.4	B1503	0.4
High	EIYSDTQFPS	12	1	1	Q9UKY7		0	5.39475e+07	0.002	0.0137	23.64	0.993701	2	1186.53	0.00119335	62.8207	0	C1203	5.71	A6802	406.8	A6802	1.9
High	AKFGSKEEY	8	1	1	Q5VWQ8		0	8.00354e+06	0.002	0.01368	23.36	1.70503	2	1058.51	-0.494271	24.4539	0	C1203	51.85	B1503	22	B1503	0.6
High	RQIGSRSY	13	1	1	P51114		0	6.0925e+07	0.002	0.01322	23.25	1.61013	2	966.511	-0.376889	21.2261	0	C1203	30	B1503	7.2	B1503	0.12
High	KKVKSQSTF	1	1	1	Q9HCK8		0	0	0.002	0.01427	23.17	0.824613	2	1052.61	-0.000399008	17.0735	0	C1203	33.33	B1503	6.8	B1503	0.12
High	AMRIGAEVY	14	2	2	P06733;P13929		0	1.51979e+07	0.002	0.01346	23.12	1.59446	2	1009.51	-0.225888	48.8869	0	C1203	44.44	B1503	7.4	B1503	0.12
High	NKYMGLTQF	3	1	1	Q16665		0	1.87836e+07	0.002	0.01254	23.03	2.07407	2	1101.54	0.609666	58.3493	0	C1203	33.33	B1503	10.3	B1503	0.25
High	LVYDGKIYTL	2	1	1	Q96CT2		0	9.55362e+06	0.002	0.01178	23.03	1.21572	2	1184.66	-0.314	67.5422	0	C1203	42.86	A6802	427.9	C1203	1.7
High	AKINEIRQM	4	1	1	Q15366		0	5.84244e+06	0.002	0.01383	22.6	1.8231	2	1102.6	0.559054	30.8051	0	C1203	40.74	B1503	48.4	B1503	1.1
High	RKEETVTVY	15	1	1	Q9BZX2		0	3.27814e+07	0.002	0.01329	22.05	2.01529	2	1124.59	-0.650573	28.3214	0	C1203	48.15	B1503	13.6	B1503	0.4
High	RKGEFETGF	4	2	2	P15170;Q8IYD1		0	1.16357e+07	0.002	0.01175	22.04	2.19717	2	1070.53	-0.620999	35.8069	0	C1203	33.33	B1503	71	B1503	1.5
High	MKIPTGQEY	1	1	1	Q13557		0	1.38622e+07	0.002	0.01418	21.74	2.86007	2	1066.52	-0.0675659	47.5236	0	C1203	48.15	B1503	7.4	B1503	0.12
High	HTFFIKDSL	12	1	1	Q8NFG4		0	2.77488e+07	0.002	0.01328	21.2	3.33926	2	1107.58	-0.38639	53.2296	0	C1203	70.37	A6802	12.6	A6802	0.1
High	KGFAFVEY	2	1	1	Q9UHX1		0	5.72659e+06	0.002	0.01343	20.85	3.65158	2	960.482	-0.307066	62.2094	0	C1203	40	B1503	237.5	B1503	3.5
High	GKFDWRQQY	12	1	1	Q8N766		0	2.43537e+07	0.002	0.01298	19.67	4.70691	2	1227.59	0.142182	45.763	0	C1203	44.44	B1503	19.2	B1503	0.5
High	HVTIPTAHV	1	1	1	Q6P2H3		0	1.14954e+07	0.002	0.01192	18.62	5.11968	2	974.542	0.036305	37.4683	0	C1203	37.04	A6802	14.5	A6802	0.12
High	RKYVNGSTY	3	1	1	Q6P2Q9		0	1.44089e+07	0.002	0.01362	18.4	5.83885	2	1087.55	-0.630349	23.3812	0	C1203	44.44	B1503	3.2	B1503	0.02
High	QQFLIQQQY	2	1	1	Q6Y7W6		0	7.57558e+06	0.002	0.01337	13.86	16.039	2	1195.61	0.120501	67.1431	0	C1203	40.74	B1503	9.2	B1503	0.17
High	SQGSFPEHY	9	1	1	Q9HBH0		0	2.52373e+07	0.002	0.0143	13.35	8.04312	2	1051.45	-1.09027	39.1079	0	C1203	44.44	B1503	21.3	B1503	0.6
High	TVARPSVPA	20	1	1	P08174		0	1.64481e+09	0.003	0.01725	57.27	0.000308999	2	897.514	-1.68331	32.7376	0	C1203	7.41	A6802	24.4	A6802	0.25
High	SVADTVARV	3	1	1	Q9NYY3		0	2.73433e+07	0.003	0.01559	56.44	0.00100544	2	917.505	-0.673713	41.0799	0	C1203	48.15	A6802	8.1	A6802	0.05
High	KQAEIVKRL	7	3	3	Q08117;Q04725;Q04727		0	2.82202e+07	0.003	0.02282	47.27	0.00154031	2	1084.68	-1.57361	23.817	0	C1203	51.85	B1503	55.4	B1503	1.2
High	STSNIQVGL	5	1	1	Q86V48		0	1.72995e+07	0.003	0.02016	46.6	0.00747668	2	918.489	-0.663422	56.0953	0	C1203	74.07	A6802	27.8	A6802	0.25
High	KKKSKVSSY	2	1	1	Q92620		0	596384	0.003	0.01562	46.33	0.00344208	2	1054.63	-0.246116	15.8383	0	C1203	44.44	B1503	27.6	B1503	0.7
High	FMVSQVLF	1	1	1	P46597		0	2.17907e+07	0.003	0.02291	45.81	0.00832796	2	970.506	-0.378236	97.1121	0	C1203	36.67	B1503	43.4	B1503	1
High	TSVPELQIPL	7	1	1	Q96R09		0	9.36146e+07	0.003	0.02094	43.07	0.00749378	2	1096.62	-0.868424	88.0463	0	C1203	54.29	A6802	364.9	A6802	1.8
High	SAKTPGFSV	28	1	1	Q9NY61		0	1.31323e+08	0.003	0.01571	42.99	0.0239743	2	893.473	-0.189733	40.3069	0	C1203	74.07	C1203	486.7	C1203	1.6
High	FVGYFPATV	3	1	1	Q9HCE1		0	2.5687e+07	0.003	0.01916	42.72	0.0200889	2	1000.51	-0.405759	82.1275	0	C1203	48.15	C1203	25	C1203	0.1
High	DASEIQVQV	26	1	1	P18858		0	2.49995e+07	0.003	0.02389	42.38	0.0253871	2	988.495	-0.0575272	63.4606	0	C1203	85.19	A6802	33.3	A6802	0.4
High	FTSSRHTVV	22	1	1	Q9NZ01		0	6.25778e+07	0.003	0.01801	41.77	0.0295747	2	1033.54	-1.08546	24.1185	0	C1203	81.48	C1203	12.9	C1203	0.04
High	QKAPDGKSY	6	1	1	Q9HBL8		0	3.64553e+06	0.003	0.02252	40.99	0.0346489	2	993.499	-0.587874	19.1804	0	C1203	51.85	B1503	67.6	B1503	1.4
High	SVIDIINGEA	1	1	1	Q7L5N1		0	2.44337e+07	0.003	0.01934	40.67	0.036904	2	1030.54	0.0992442	77.4293	0	C1203	5.71	A6802	32.6	A6802	0.3
High	KTASINQNV	23	1	1	Q8NI77		0	49387179	0.003	0.02137	40.48	0.0413345	2	974.526	-0.348497	25.4247	0	C1203	74.07	A6802	59.5	A6802	0.6
High	HKVETFSGVY	11	1	1	P62081		0	2.86772e+07	0.003	0.01857	40.25	0.0405238	2	1166.58	-0.670118	38.3718	0	C1203	34.29	B1503	11.8	B1503	0.25
High	YGFPSPIFL	2	1	1	Q76EJ3		0	13306866	0.003	0.0167	40.18	0.0320488	2	1040.54	-1.02477	101.284	0	C1203	59.26	C1203	13.8	C1203	0.04
High	EVFGHAIKA	35	1	1	P54136		0	3.03445e+08	0.003	0.02086	40.05	0.0336157	2	971.53	-1.07821	34.7621	0	C1203	11.11	A6802	17.5	A6802	0.17
High	ITADVNHNL	20	1	1	Q16222		0	8.88401e+07	0.003	0.01763	38.96	0.0466428	2	996.51	-0.92821	39.7494	0	C1203	74.07	A6802	22.9	A6802	0.25
High	KAFSVVIQA	10	1	1	Q16533		0	1.38758e+07	0.003	0.01574	38.6	0.0295333	2	962.567	-0.1779	52.8094	0	C1203	51.85	C1203	583.4	C1203	1.8
High	TTTQITKTV	33	1	1	P11171		0	7.15343e+07	0.003	0.02141	38.6	0.0262273	2	992.562	-0.654094	29.2457	0	C1203	74.07	A6802	44.9	A6802	0.4
High	SVITQVFHV	23	1	1	Q00341		0	112817616	0.003	0.01976	38.47	0.0292786	2	1029.57	1.07699	70.4863	0	C1203	40.74	A6802	10.4	A6802	0.08
High	VAFPTEIKV	3	1	1	Q9BPX7		0	5.23859e+07	0.003	0.02078	38.32	0.0443608	2	1003.58	-0.474891	65.022	0	C1203	92.59	C1203	206.8	C1203	0.9
High	EVAQAGKAV	16	1	1	Q9UPN9		0	3.03419e+07	0.003	0.02161	38.3	0.073911	2	872.484	-0.0368583	22.8235	0	C1203	44.44	A6802	79.3	A6802	0.7
High	FVCDIRPEI	2	1	1	O75348		0	1.66757e+07	0.003	0.02022	38.23	0.0706702	2	1091.56	-0.208803	69.052	0	C1203	40.74	A6802	177.8	C1203	0.8
High	GKYGSSLEF	16	1	1	P55212		0	1.63474e+07	0.003	0.01579	38.2	0.0579543	2	987.478	-0.210023	49.0927	0	C1203	44.44	B1503	3.6	B1503	0.03
High	AAYGRSPMV	9	1	1	Q04726		0	1.70156e+07	0.003	0.02135	37.92	0.0477689	2	951.471	-0.239791	36.2928	0	C1203	85.19	C1203	34.4	C1203	0.15
High	IQTRGGTF	18	1	1	O14672		0	2.36814e+07	0.003	0.02371	37.44	0.0713725	2	879.468	0.0444048	29.826	0	C1203	26.67	B1503	45.7	B1503	1.1
High	ETTSISKITV	19	1	1	P51587		0	5.94512e+07	0.003	0.01793	36.82	0.0563286	2	1078.6	-0.588754	47.1964	0	C1203	40	A6802	8.3	A6802	0.06
High	FTAAIISRV	11	1	1	Q9Y570		0	5.37928e+07	0.003	0.01949	36.57	0.0385953	2	977.577	-0.523906	57.6206	0	C1203	77.78	A6802	2.5	A6802	0.01
High	TTSNTVSKL	11	1	1	Q6NZI2		0	2.66011e+07	0.003	0.02025	36.34	0.0704022	2	950.515	-0.604124	25.921	0	C1203	74.07	A6802	219.5	A6802	1.3
High	KAIDVVVMV	10	1	1	Q8TDR0		0	32201766	0.003	0.02389	36.11	0.0618266	2	973.575	-0.26151	63.5584	0	C1203	85.19	C1203	46.5	C1203	0.25
High	TTVRVTNSNA	1	3	3	Q15155;Q5JPE7;P69849		0	6.1139e+06	0.003	0.02064	36.11	0.109987	2	1062.55	-0.0873026	24.1708	0	C1203	20	A6802	85.9	A6802	0.7
High	EIFPVSFHV	7	1	1	Q5THK1		0	3.00784e+07	0.003	0.02313	36.02	0.102189	2	1074.56	-0.193747	78.6916	0	C1203	48.15	A6802	2.7	A6802	0.01
High	ETVTATATSQV	12	1	1	Q9H4A3		0	60717025	0.003	0.0188	35.93	0.0929566	2	1107.55	-0.283027	44.0827	0		0	A6802	40.9	A6802	0.4
High	LKSVNELIY	10	1	1	P18124		0	6.87536e+07	0.003	0.01741	35.72	0.0555793	2	1078.61	-0.354251	57.7426	0	C1203	44.44	B1503	15.1	B1503	0.4
High	EVIRDVINV	24	1	1	Q6IEG0		0	1.62731e+08	0.003	0.01847	35.22	0.0732731	2	1056.6	-1.32514	59.7409	0	C1203	44.44	A6802	7.8	A6802	0.05
High	LAAPVISVL	7	1	1	O60337		0	4.37809e+07	0.003	0.01641	35.21	0.0190121	2	882.566	-0.306955	85.0444	0	C1203	92.59	C1203	8.2	C1203	0.01
High	GAYKYIQEL	15	1	1	P61313		0	2.98488e+07	0.003	0.01528	35.08	0.116933	2	1084.57	-0.161382	56.5851	0	C1203	85.19	C1203	51.5	C1203	0.25
High	DLAPIGIRV	4	1	1	Q99714		0	9.99838e+06	0.003	0.01617	35.06	0.0366781	2	953.578	0.0284802	68.9936	0	C1203	51.85	A6802	140	A6802	1
High	MAAMATARV	6	1	1	Q15904		0	1.31058e+07	0.003	0.02166	34.98	0.142022	2	921.464	-0.414963	36.5556	0	C1203	77.78	A6802	4.2	A6802	0.01
High	TAAGVDHRV	8	1	1	P28065		0	3.28103e+06	0.003	0.01767	34.86	0.122764	2	925.485	-0.217675	19.3923	0	C1203	81.48	A6802	19.1	A6802	0.17
High	HVGDIIKEV	50	2	2	Q14168;Q9NZW5		0	3.26637e+08	0.003	0.02452	34.81	0.0784628	2	1009.57	-0.8927	45.2566	0	C1203	51.85	A6802	232.4	A6802	1.4
High	TVVEPYNATL	4	10	10	Q13885;Q9BVA1;Q13509;P04350;P68371;P07437;Q9BUF5;A6NNZ2;Q3ZCM7;A6NKZ8		0	1.02025e+07	0.003	0.01565	34.74	0.154137	2	1106.57	-0.155313	64.3545	0	C1203	34.29	A6802	107.5	A6802	0.8
High	TNSSVIVRV	6	1	1	Q8NI29		0	3.291e+07	0.003	0.01861	34.54	0.094851	2	974.562	-0.862898	41.0342	0	C1203	51.85	A6802	307.6	A6802	1.6
High	TAQTLVRIL	16	1	1	Q12905		0	2.14296e+07	0.003	0.01778	34.51	0.0495596	2	1014.63	-0.89096	59.3973	0	C1203	81.48	C1203	596.3	C1203	1.9
High	SVAVIHQSL	2	1	1	Q9BV87		0	12584087	0.003	0.01985	34.44	0.0810156	2	953.541	-0.320915	42.6346	0	C1203	40.74	A6802	190.3	A6802	1.2
High	NTAYIQAIV	1	1	1	Q8IX18		0	1.23514e+07	0.003	0.01518	34.37	0.147408	2	992.54	-0.765171	69.8693	0	C1203	70.37	A6802	3.1	A6802	0.01
High	AKIPGTGAL	12	1	1	O75298		0	1.92607e+07	0.003	0.02237	34.03	0.0753766	2	827.498	-0.367035	41.9858	0	C1203	48.15	B1503	30.7	B1503	0.8
High	FTITPPTAQVV	1	1	1	P52907		0	13161583	0.003	0.0225	33.99	0.158792	2	1173.65	0.384925	77.3434	0		0	A6802	290.8	A6802	1.6
High	ELINIIDGV	3	1	1	Q8NI22		0	2.27507e+07	0.003	0.02499	33.85	0.111884	2	985.556	-0.171768	89.3022	0	C1203	40.74	A6802	11.1	A6802	0.09
High	GQWGGGSHY	42	1	1	B1AH88		0	3.39499e+08	0.003	0.01684	33.72	0.0498079	2	948.396	-0.279265	31.9166	0	C1203	40.74	B1503	5	B1503	0.05
High	MSSSVAVQA	7	1	1	O75694		0	1.69346e+07	0.003	0.02326	33.69	0.215192	2	879.424	-0.314537	39.6491	0	C1203	40.74	A6802	36.2	A6802	0.4
High	MAAALFVLL	1	1	1	P35613		0	2.11795e+07	0.003	0.01738	33.65	0.0860018	2	948.559	-0.180259	105.749	0	C1203	81.48	A6802	7.8	A6802	0.05
High	HAFWGGSVV	14	1	1	O75179		0	1.25207e+08	0.003	0.02295	33.63	0.082974	2	959.473	-0.429689	59.0014	0	C1203	81.48	C1203	6.6	C1203	0.01
High	EAADVLIKA	19	1	1	Q7Z6Z7		0	172027030	0.003	0.02312	33.6	0.161795	2	929.53	-0.351226	47.5108	0	C1203	48.15	A6802	12.6	A6802	0.1
High	GKSSVIQVF	4	1	1	Q8WVC6		0	2.58959e+07	0.003	0.01841	33.58	0.119346	2	964.546	-0.569599	53.6358	0	C1203	44.44	B1503	11.5	B1503	0.25
High	FAYDGKDYI	10	11	12	P30462;P18463;Q95365;P30475;Q29836;Q31612;P30504;Q9TNN7;P30505;Q95604;Q29865;P13747		0	3.54638e+07	0.003	0.02296	33.53	0.138317	2	1091.5	-0.99661	60.5555	0	C1203	77.78	C1203	5.5	C1203	0.01
High	GKVPVVVSY	8	1	1	Q9Y4C4		0	1.18354e+07	0.003	0.0181	33.51	0.116116	2	947.556	-0.45451	48.8883	0	C1203	51.85	B1503	14.5	B1503	0.4
High	KATAYILSV	23	1	1	P01106		0	4.55363e+07	0.003	0.02083	33.19	0.0640204	2	965.567	-0.00450076	55.3297	0	C1203	81.48	C1203	52.2	C1203	0.25
High	SNSDVIIYV	6	1	1	P38606		0	5.70467e+07	0.003	0.01972	33.04	0.182026	2	1009.52	-0.134956	72.582	0	C1203	51.85	A6802	71.1	A6802	0.6
High	SKNVSGISF	11	1	1	P49792		0	1.11405e+07	0.003	0.02066	32.79	0.176558	2	938.494	-0.4148	45.94	0	C1203	33.33	B1503	5.9	B1503	0.08
High	KQHVTEAF	9	1	1	O43175		0	4.18795e+06	0.003	0.0234	32.53	0.291298	2	959.494	-0.622429	24.8557	0	C1203	30	B1503	19	B1503	0.5
High	KSFEAPIKL	14	1	1	Q8TCT9		0	2.85155e+07	0.003	0.02353	32.48	0.120953	2	1032.61	-0.520366	48.7463	0	C1203	81.48	C1203	102	C1203	0.5
High	ETSGIGEARV	11	1	1	P61764		0	836862403	0.003	0.0192	32.45	0.173443	2	1018.52	-1.27442	34.2801	0	C1203	42.86	A6802	10.9	A6802	0.08
High	ETFSSYISV	17	1	1	A5PLN9		0	1.23773e+08	0.003	0.02164	32.38	0.202854	2	1032.49	-0.345371	76.2109	0	C1203	77.78	A6802	3	A6802	0.01
High	EVNKVISSV	18	1	1	Q93008		0	3.35717e+08	0.003	0.02222	32.17	0.179685	2	974.551	-1.1139	39.5395	0	C1203	40.74	A6802	7.9	A6802	0.05
High	IAISRTPVL	2	1	1	Q9H3K2		0	1.47023e+07	0.003	0.02084	32.03	0.0739718	2	969.609	-0.327986	53.3395	0	C1203	81.48	C1203	35.6	C1203	0.17
High	ETVGILHKV	16	1	1	Q96HH9		0	1.75109e+08	0.003	0.02015	32.03	0.0821804	2	995.588	-0.699267	36.9549	0	C1203	70.37	A6802	2.3	A6802	0.01
High	AQHLTVSGF	7	1	1	Q96GX5		0	1.54938e+07	0.003	0.01898	32.02	0.329731	2	959.495	0.0136892	47.3179	0	C1203	37.04	B1503	3.6	B1503	0.03
High	RQIDQFLVV	8	2	2	O94776;Q9BTC8		0	4.81167e+07	0.003	0.01696	32	0.177488	2	1117.64	-0.063672	67.6465	0	C1203	48.15	B1503	8.7	B1503	0.17
High	GKVPQPAIL	4	1	1	P24928		0	1.46035e+07	0.003	0.01936	31.98	0.040631	2	922.572	-0.608661	47.8221	0	C1203	48.15	B1503	371.9	B1503	4.5
High	YAFLHRTL	5	2	2	Q9UH17;Q8IUX4		0	1.8238e+07	0.003	0.02014	31.75	0.188039	2	1020.56	-0.422265	46.9656	0	C1203	90	C1203	586.9	C1203	1.9
High	HTFFIGDHA	11	1	1	O15294		0	3.48549e+07	0.003	0.01574	31.34	0.190496	2	1044.49	-0.465193	42.5851	0	C1203	33.33	A6802	12.7	A6802	0.12
High	GTYFNPHTV	17	1	1	O60294		0	7.88062e+07	0.003	0.02055	31.23	0.237646	2	1035.49	-0.0133448	46.1023	0	C1203	77.78	C1203	101.1	C1203	0.5
High	RQKGTGKEY	1	1	1	O43293		0	4.4553e+06	0.003	0.02257	30.92	0.283831	2	1066.56	-0.809469	15.8304	0	C1203	48.15	B1503	8.9	B1503	0.17
High	NTAETITRV	11	1	1	O96006		0	4.01274e+07	0.003	0.02381	30.41	0.382801	2	1004.54	-0.0451565	34.482	0	C1203	77.78	A6802	4.8	A6802	0.02
High	AKQRLQQLF	4	1	1	Q9P0U1		0	17782698	0.003	0.02335	30.2	0.153133	2	1131.66	-0.839637	40.4551	0	C1203	33.33	B1503	69.4	B1503	1.5
High	AHLNPAVTF	7	1	1	Q92482		0	2.31329e+07	0.003	0.022	30.16	0.332425	2	969.515	0.151785	51.1293	0	C1203	40.74	B1503	27.2	B1503	0.7
High	IKKEFDKKY	16	2	2	P63167;Q96FJ2		0	1.90554e+07	0.003	0.02194	30.14	0.239891	3	1198.68	-0.384153	20.5072	0	C1203	44.44	B1503	197	B1503	3
High	EIASITEQL	42	1	1	Q5UIP0		0	2.1641e+08	0.003	0.01543	29.87	0.432041	2	1003.53	-0.0349645	67.8082	0	C1203	44.44	A6802	9	A6802	0.06
High	TAAQVARVL	1	1	1	A5YKK6		0	39755353	0.003	0.01712	29.3	0.315519	2	928.557	-0.339015	41.9589	0	C1203	85.19	C1203	91	C1203	0.5
High	TSSKVIQSV	2	1	1	O14976		0	2.06629e+07	0.003	0.02433	29.19	0.298608	2	948.536	-0.464089	30.3227	0	C1203	74.07	A6802	72.9	A6802	0.6
High	STAAVIQNV	11	1	1	Q6P4R8		0	1.91442e+07	0.003	0.01521	28.99	0.679746	2	902.494	-0.0255694	49.0294	0	C1203	74.07	A6802	4.5	A6802	0.01
High	TTSAVTVKS	14	1	1	P61513		0	2.66821e+07	0.003	0.02446	28.96	0.292296	2	893.494	-0.191784	22.2813	0	C1203	37.04	A6802	293.5	A6802	1.6
High	LQAPPLTSL	16	1	1	Q96EX3		0	1.48644e+07	0.003	0.02207	28.89	0.212857	2	939.551	-0.378433	74.3349	0	C1203	48.15	B1503	6.8	B1503	0.12
High	LKKDDSVGY	10	1	1	Q8N766		0	7.25109e+06	0.003	0.02088	28.74	0.386009	2	1024.53	-0.535068	24.389	0	C1203	44.44	B1503	67.8	B1503	1.4
High	ETADVIAKV	60	1	1	O43617		0	1.83626e+09	0.003	0.01751	28.58	0.544024	2	945.524	-1.15899	43.7338	0	C1203	77.78	A6802	2	A6802	0.01
High	GKVKSGGTYF	8	1	1	P55017		0	1.23385e+07	0.003	0.02409	28.57	0.612622	2	1043.55	-1.53195	26.2506	0	C1203	31.43	B1503	59.1	B1503	1.3
High	RAFGGILVV	4	1	1	Q8NHX9		0	1.04924e+08	0.003	0.01868	28.37	0.147511	2	931.572	-0.574644	66.5533	0	C1203	92.59	C1203	8.7	C1203	0.01
High	HSAEILAEI	35	1	1	Q6FI81		0	1.24703e+09	0.003	0.02241	28.25	0.447599	2	982.52	-0.805496	57.2236	0	C1203	70.37	A6802	5.3	A6802	0.03
High	EVFQGVEKL	14	1	1	Q9Y330		0	6.78059e+07	0.003	0.01782	28.22	0.676768	2	1048.57	-0.544782	55.5691	0	C1203	44.44	A6802	78	A6802	0.7
High	DVIYPMAVV	9	1	1	P78406		0	5.00186e+07	0.003	0.02281	28.21	0.697733	2	1006.53	-0.315819	89.2452	0	C1203	40.74	A6802	9.5	A6802	0.07
High	RKPDQVFQSY	15	1	1	Q96K76		0	1.9215e+07	0.003	0.02024	28.17	0.578149	2	1267.64	-0.296279	37.4005	0	C1203	40	B1503	132.6	B1503	2.5
High	TTSTITRHTV	8	1	1	Q07954		0	1.55334e+07	0.003	0.01477	28.04	0.677062	2	1116.6	-0.687906	22.8436	0	C1203	42.86	A6802	11.8	A6802	0.1
High	DTFPTAMHI	11	1	1	P07954		0	2.23701e+07	0.003	0.01973	27.92	0.624918	2	1032.48	-0.0795925	65.8032	0	C1203	70.37	A6802	17.5	A6802	0.17
High	GQDKPHETY	6	1	1	Q12789		0	2.93003e+06	0.003	0.01597	27.73	0.377788	2	1074.49	0.0593034	18.7285	0	C1203	40.74	B1503	85.5	B1503	1.7
High	AKIVPKISY	5	1	1	Q7Z417		0	1.0273e+08	0.003	0.02339	27.61	0.141999	2	1018.63	-1.21517	40.927	0	C1203	44.44	B1503	22.9	B1503	0.6
High	IKFFTGDVF	9	1	1	Q9UBE0		0	9.63267e+06	0.003	0.02268	27.53	0.718689	2	1073.57	-0.193236	77.9116	0	C1203	37.04	B1503	4.4	B1503	0.04
High	EISSILKEL	19	1	1	Q9Y4F5		0	3.25741e+07	0.003	0.02302	27.42	0.35457	2	1031.6	-0.509289	72.9324	0	C1203	51.85	A6802	126.7	A6802	0.9
High	RKIKVSNTL	22	1	1	P36543		0	1.12246e+08	0.003	0.02249	27.33	0.105871	2	1058.67	-1.11799	23.1447	0	C1203	40.74	B1503	25.3	B1503	0.7
High	ETIFGEWTV	24	1	1	Q96MT1		0	3.82714e+08	0.003	0.02246	27.26	0.709348	2	1081.52	0.194144	93.5308	0	C1203	70.37	A6802	3.8	A6802	0.01
High	LKTGISDVF	1	1	1	P19338		0	31195982	0.003	0.01779	27.16	0.527889	2	979.546	-0.161676	58.1518	0	C1203	37.04	B1503	25.6	B1503	0.7
High	TVADMLHVV	7	1	1	O75439		0	6.60046e+06	0.003	0.02406	27.16	0.648467	2	984.518	-0.468692	67.4007	0	C1203	48.15	A6802	5.8	A6802	0.03
High	KQLPESESF	1	1	1	Q8NI35		0	1.56789e+07	0.003	0.02187	27.04	0.94509	2	1064.52	-1.01776	39.3818	0	C1203	37.04	B1503	4.6	B1503	0.04
High	FASTILHLV	25	1	1	P61803		0	3.48149e+07	0.003	0.01581	26.36	0.854192	2	1000.58	-0.247132	72.957	0	C1203	81.48	A6802	5.7	A6802	0.03
High	STSAVNHNV	11	1	1	Q07157		0	1.83053e+07	0.003	0.02394	25.98	0.827071	2	928.448	-0.220388	21.3065	0	C1203	70.37	A6802	5.3	A6802	0.02
High	AKYPIKQSL	10	1	1	P21283		0	3.54756e+07	0.003	0.02186	25.57	0.458014	2	1047.62	-0.994023	32.5516	0	C1203	51.85	B1503	134.5	B1503	2.5
High	KKLDLISEL	3	1	1	Q2M389		0	1.89555e+07	0.003	0.0192	25.4	0.341469	2	1058.65	0.264793	56.6252	0	C1203	48.15	B1503	109	B1503	2
High	RKLRGHVSH	7	1	1	P46776		0	3.27653e+07	0.003	0.02222	24.76	0.636474	2	1089.64	-0.130159	16.0159	0	C1203	3.7	B1503	418.3	B1503	4.5
High	FQAPRNPTL	6	1	1	Q8IZW8		0	6.58052e+07	0.003	0.01722	24.7	1.19087	2	1043.56	-0.371315	46.5366	0	C1203	55.56	B1503	9.6	C1203	0.15
High	DTTVIIWQV	8	1	1	Q9H7D7		0	1.06189e+08	0.003	0.02048	23.98	2.05472	2	1074.58	0.0224378	94.9954	0	C1203	70.37	A6802	16.5	A6802	0.15
High	RVADILTQL	3	1	1	Q9BZZ5		0	9.91039e+06	0.003	0.02502	23.97	1.06811	2	1028.61	-0.366155	67.6116	0	C1203	44.44	C1203	55.7	C1203	0.25
High	HAIKSVKIY	13	1	1	P53618		0	23563360	0.003	0.01999	23.85	0.774331	2	1058.64	-0.396544	28.3941	0	C1203	81.48	B1503	24.9	C1203	0.4
High	GKSTTTGHLIY	13	3	3	P68104;Q05639;Q5VTE0		0	1.69975e+07	0.003	0.01878	23.73	1.75875	2	1177.62	0.475875	30.629	0		0	B1503	498.7	B1503	5
High	DIFSDLYYV	4	1	1	Q2TAL8		0	5.81838e+06	0.003	0.02348	23.61	1.37905	2	1134.53	-0.595603	107.069	0	C1203	44.44	A6802	5.5	A6802	0.03
High	IGAARTKTY	9	1	1	Q9Y3B1		0	5.0201e+06	0.003	0.02335	23.29	1.19102	2	980.552	-0.535263	20.9456	0	C1203	48.15	B1503	91.2	C1203	0.9
High	RSFHEVREF	6	1	1	Q92963		0	1.1703e+07	0.003	0.01808	23.07	2.39584	3	1206.6	0.601444	30.6881	0	C1203	74.07	B1503	7.4	B1503	0.12
High	LQKANQEQY	2	1	1	Q9UBU8		0	1.90783e+06	0.003	0.02486	22.95	2.10046	2	1121.56	-0.608415	24.2945	0	C1203	37.04	B1503	15.6	B1503	0.4
High	SAIPHPLIM	34	1	1	P61201		0	1.28361e+08	0.003	0.01573	22.94	1.15682	2	978.544	-0.66085	60.0034	0	C1203	81.48	C1203	11.7	C1203	0.03
High	QQFRNAPPF	7	1	1	O60830		0	5.72789e+07	0.003	0.02107	22.93	2.55328	2	1104.56	-0.139505	47.2962	0	C1203	33.33	B1503	2.5	B1503	0.01
High	ETFYIGKLI	14	1	1	Q7KZ85		0	1.84422e+07	0.003	0.01684	22.92	1.13153	2	1083.61	0.0524235	75.9258	0	C1203	66.67	A6802	19.4	A6802	0.17
High	RKVPDNQQF	16	1	1	Q9BX10		0	1.19296e+07	0.003	0.02351	22.88	2.28787	2	1131.59	-0.609718	26.0203	0	C1203	37.04	B1503	31.5	B1503	0.8
High	EAFDRSFEV	39	1	1	Q7Z4W1		0	3.92197e+08	0.003	0.01682	22.8	1.55527	2	1099.5	-1.31458	58.1904	0	C1203	85.19	A6802	4	A6802	0.01
High	RKIFPSVIKY	2	1	1	Q8IWV7		0	1.53287e+07	0.003	0.01812	22.75	0.300481	3	1250.76	-0.271795	46.7148	0	C1203	34.29	B1503	17.1	B1503	0.5
High	EVFEKATFI	34	1	1	P19338		0	2.29473e+08	0.003	0.01673	22.46	1.79798	2	1083.57	-0.404614	62.8298	0	C1203	37.04	A6802	8.9	A6802	0.06
High	KKANITFEY	24	1	1	O15372		0	8.52002e+07	0.003	0.01782	22.46	2.16263	2	1113.59	-1.09765	38.6952	0	C1203	44.44	B1503	16.7	B1503	0.4
High	ETSKYYVTI	12	2	2	P68104;Q5VTE0		0	9.04907e+07	0.003	0.01517	22.45	2.44038	2	1103.56	-0.105226	52.8317	0	C1203	70.37	A6802	12.1	A6802	0.1
High	RAFDQGADAIY	4	1	1	Q9UDW1		0	33433985	0.003	0.01748	22.44	1.69396	2	1226.58	-0.361866	51.2765	0		0	B1503	65.2	B1503	1.4
High	EVAKMIQEV	13	1	1	Q9NRD5		0	1.24276e+08	0.003	0.02375	22.41	2.47272	2	1046.55	-0.252381	48.9067	0	C1203	48.15	A6802	8.6	A6802	0.06
High	SAVNIIRTF	1	1	1	P29728		0	4.32169e+06	0.003	0.01961	22.32	1.32262	2	1020.58	-2.24758	60.0793	0	C1203	77.78	B1503	18.8	C1203	0.1
High	HTAEITHEI	18	1	1	Q00597		0	3.19148e+07	0.003	0.01913	21.96	2.67645	2	1050.52	-0.184163	29.1245	0	C1203	70.37	A6802	2.5	A6802	0.01
High	EQYESFVKF	5	1	1	Q9H9L7		0	1.23567e+07	0.003	0.01854	21.66	2.48542	2	1176.56	0.0826779	65.3209	0	C1203	40.74	B1503	6.2	B1503	0.09
High	KQRKVEVY	3	1	1	O75150		0	2.44541e+06	0.003	0.02071	21.63	1.25253	2	1049.61	-0.198502	19.7571	0	C1203	30	B1503	42.7	B1503	1
High	EIFADPRTV	20	1	1	Q92871		0	7.80975e+07	0.003	0.0167	21.61	3.66172	2	1047.55	-0.298642	54.0865	0	C1203	51.85	A6802	96.6	A6802	0.8
High	RAFPNKQGY	1	1	1	O43684		0	6.46975e+06	0.003	0.01475	21.49	2.63573	2	1080.56	-1.37602	26.4757	0	C1203	85.19	B1503	11.2	B1503	0.25
High	KKREAEEVY	7	1	1	Q9Y383		0	3.48004e+06	0.003	0.01768	20.99	2.78178	2	1151.6	-0.569034	18.6858	0	C1203	44.44	B1503	19	B1503	0.5
High	RKHNQRPTF	5	1	1	P21333		0	4.13473e+06	0.003	0.01787	20.8	2.40671	2	1183.64	-0.418093	18.3354	0	C1203	33.33	B1503	14.5	B1503	0.4
High	AKAQALVQY	2	1	1	Q9Y2Q5		0	1.08455e+07	0.003	0.01679	20.78	2.6334	2	991.556	-1.01093	38.9644	0	C1203	48.15	B1503	13.6	B1503	0.4
High	EVVDKINQV	3	1	1	Q8WXH0		0	129407290	0.003	0.02292	20.48	3.29449	2	1043.57	-0.96797	41.0543	0	C1203	44.44	A6802	7.7	A6802	0.05
High	MVNYNPETV	5	1	1	P27708		0	31484543	0.003	0.02207	20.48	3.14452	2	1066.49	-0.169795	55.1216	0	C1203	44.44	A6802	24.9	C1203	0.2
High	NQKPPSAEY	17	1	1	Q9UPN3		0	2.28977e+07	0.003	0.02367	20.42	3.81739	2	1033.49	-0.482766	27.6405	0	C1203	48.15	B1503	10.1	B1503	0.2
High	KKAIQDPAF	5	1	1	Q7Z6Z7		0	6.08789e+06	0.003	0.01594	20.24	3.72628	2	1017.57	-0.309532	29.9865	0	C1203	33.33	B1503	14.8	B1503	0.4
High	KAYGKAKSI	6	2	2	Q99613;B5ME19		0	3.7298e+06	0.003	0.02267	19.9	1.24279	2	965.578	-0.140794	17.3663	0	C1203	77.78	C1203	73.9	C1203	0.4
High	AKLPSETIF	2	1	1	P57678		0	2.66564e+07	0.003	0.02	19.87	3.58935	2	1005.56	-0.850029	57.8357	0	C1203	40.74	B1503	12.6	B1503	0.3
High	GKNEVTLEF	9	1	1	Q08945		0	2.13428e+07	0.003	0.01815	19.81	5.00055	2	1036.53	0.0503199	54.0908	0	C1203	40.74	B1503	17.3	B1503	0.5
High	EVIKELAQI	8	1	1	O15355		0	2.54057e+07	0.003	0.01986	19.68	2.32301	2	1042.61	-0.268584	60.4405	0	C1203	29.63	A6802	18.4	A6802	0.17
High	YAYDGKDYI	4	16	16	P01892;P30447;P05534;P10316;P01889;P30460;Q04826;P30479;P30480;P30486;P18464;P30490;P30498;Q31610;P30499;P04222		0	2.56164e+07	0.003	0.01886	19.43	3.02052	2	1107.5	0.205885	52.8384	0	C1203	77.78	C1203	6	C1203	0.01
High	LVYDAVKYTL	2	1	1	Q13387		0	9.16985e+06	0.003	0.01591	19.25	3.53758	2	1184.65	-1.0353	67.5817	0	C1203	37.14	C1203	335.7	C1203	1.3
High	SKHRAQVIY	6	1	1	P62851		0	7.56134e+06	0.003	0.01925	19.2	4.26083	2	1101.62	-1.10873	21.5037	0	C1203	40.74	B1503	15.9	B1503	0.4
High	KASEKILQV	8	1	1	Q13428		0	5.28716e+07	0.003	0.01489	18.96	2.50748	2	1015.61	-0.24007	31.9599	0	C1203	88.89	C1203	127.6	C1203	0.6
High	ASFDGRISVY	2	1	1	O94979		0	2.65442e+07	0.003	0.02193	18.61	5.22307	2	1114.55	-0.775037	56.9077	0	C1203	80	B1503	29.5	C1203	0.4
High	MKFIDNTLY	7	1	1	Q14116		0	1.14195e+07	0.003	0.0208	18.55	5.48214	2	1144.57	-0.555092	64.9177	0	C1203	40.74	B1503	6.1	B1503	0.08
High	KAFPKAYLL	7	1	1	Q66K89		0	7.92643e+07	0.003	0.02356	18.39	1.31983	2	1050.63	-0.213478	50.2216	0	C1203	85.19	C1203	33.7	C1203	0.15
High	YKIYPGHGRRY	4	1	1	P83731		0	2.38252e+07	0.003	0.02482	18.16	6.45244	3	1409.74	-0.508396	25.2341	0		0	B1503	329.2	B1503	4
High	TTILIPYHI	3	1	1	Q6IQ26		0	1.94556e+07	0.003	0.01994	18	3.98046	2	1070.62	-0.383201	72.6336	0	C1203	62.96	A6802	8.9	A6802	0.06
High	VQIPPSTTY	3	1	1	Q12906		0	1.59984e+07	0.003	0.02216	17.42	9.2967	2	1005.52	-1.48489	56.2052	0	C1203	51.85	B1503	2.3	B1503	0.01
High	HTAIGAHPV	7	1	1	Q92567		0	2.73053e+07	0.003	0.0156	17.16	9.35007	2	902.484	-0.214826	23.8002	0	C1203	70.37	A6802	6	A6802	0.03
High	EINKELNQV	1	1	1	Q14683		0	1.15279e+07	0.003	0.01839	15.99	9.8844	2	1086.58	-0.884218	39.4537	0	C1203	37.04	A6802	105.7	A6802	0.8
High	VKNIKQAEF	1	2	2	O43865;Q96HN2		0	2.37708e+06	0.003	0.02299	15.73	8.06446	2	1076.61	-0.689983	28.3281	0	C1203	37.04	B1503	43.5	B1503	1
High	YTIPPGHQV	4	1	1	Q16850		0	181599397	0.003	0.02188	15.56	10.0417	2	1011.52	-1.17301	41.6571	0	C1203	77.78	A6802	7.4	A6802	0.05
High	EQADIFERV	13	1	1	O60343		0	8.00438e+07	0.003	0.02191	15.52	12.3313	2	1106.55	-0.390847	55.8952	0	C1203	44.44	A6802	43.4	A6802	0.4
High	YGYRQSVTY	6	1	1	P08174		0	1.27702e+07	0.003	0.02063	15.1	10.4977	2	1136.54	0.0489854	42.1062	0	C1203	51.85	B1503	7.1	C1203	0.06
High	HAAELIKTV	10	1	1	Q8WUM4		0	27268173	0.003	0.02267	15.08	5.05733	2	981.572	-0.310696	33.4193	0	C1203	92.59	C1203	37	C1203	0.17
High	KQVKYFIHY	9	1	1	Q9UBU8		0	1.52418e+07	0.003	0.01695	15.07	8.81238	3	1225.67	0.0774533	36.6676	0	C1203	40.74	B1503	3.2	B1503	0.02
High	TVFNFQEKV	3	1	1	Q14204		0	2.88323e+07	0.003	0.02345	14.62	13.2242	2	1111.58	-0.427242	58.4219	0	C1203	40.74	A6802	12.3	A6802	0.1
High	HTSPLTQIRL	7	1	1	Q96BP3		0	3.96627e+07	0.003	0.01844	13.36	8.70506	2	1165.67	-0.690549	49.8818	0	C1203	51.43	A6802	124.2	A6802	0.9
High	FKWSGENSY	4	1	1	Q8NI08		0	1.35457e+07	0.003	0.01618	13.22	8.74727	2	1117.49	-0.11877	49.8409	0	C1203	44.44	B1503	6.8	B1503	0.12
High	SQYNIRGVTY	1	1	1	Q8TBC4		0	1.01646e+07	0.003	0.02154	13	18.138	2	1200.6	-0.0214005	51.2995	0	C1203	34.29	B1503	4	B1503	0.03
High	ESFDSKFYV	6	1	1	Q5VV42		0	3.70166e+07	0.003	0.02481	12.92	15.7899	2	1121.52	0.272032	61.3475	0	C1203	74.07	A6802	3.1	A6802	0.01
High	KKNPSSVKF	4	1	1	Q08AM6		0	2.3753e+06	0.003	0.0235	12.18	13.1964	2	1034.6	-0.766441	19.8541	0	C1203	40.74	B1503	8.7	B1503	0.17
High	FKFGDQGGF	5	1	1	P49790		0	1.55607e+07	0.003	0.01897	10.91	20.8985	2	1002.47	-0.555105	58.9802	0	C1203	40.74	B1503	16.2	B1503	0.4
High	RASFIFISV	2	1	1	Q8NBI5		0	9.92117e+06	0.004	0.03214	45.52	0.00612566	2	1039.59	0.0116951	77.1699	0	C1203	81.48	A6802	76.5	C1203	0.5
High	EIADFFTEL	3	1	1	Q32NB8		0	1.41272e+07	0.004	0.02656	44.74	0.00812485	2	1084.52	-0.740239	101.001	0	C1203	48.15	A6802	6.4	A6802	0.04
High	SQYQGVVVY	10	1	1	Q9Y221		0	2.88182e+08	0.004	0.02699	42.61	0.0201519	2	1042.52	-1.14018	60.0836	0	C1203	51.85	B1503	1.9	B1503	0.01
High	ESSYIFVSV	8	1	1	P42336		0	3.8828e+07	0.004	0.02794	41.54	0.0218503	2	1030.51	-0.808261	81.629	0	C1203	74.07	A6802	2.7	A6802	0.01
High	GQKPGGSDF	35	2	2	P56211;O43768		0	2.19941e+08	0.004	0.02671	40.24	0.0312448	2	892.415	-1.26486	24.1523	0	C1203	37.04	B1503	11.1	B1503	0.25
High	AAYQSVRIL	17	1	1	Q9HAT2		0	6.05252e+07	0.004	0.0316	38.96	0.0321519	2	1020.58	-0.0250221	52.2784	0	C1203	88.89	C1203	33	C1203	0.15
High	TASPLVKSV	27	1	1	Q6P4F7		0	6.62832e+07	0.004	0.02903	38.06	0.0466052	2	901.535	-0.163556	36.529	0	C1203	92.59	C1203	131.3	C1203	0.6
High	ETAGIGASAHLV	5	1	1	P43490		0	8.68165e+06	0.004	0.03119	36.89	0.0767417	2	1125.59	-1.00266	48.977	0		0	A6802	13	A6802	0.12
High	AAAPQLLIV	37	1	1	Q10589		0	1.68571e+08	0.004	0.02511	36.66	0.0141548	2	895.561	-0.314496	78.7286	0	C1203	92.59	C1203	97.7	C1203	0.5
High	QAIGAIRTL	8	1	1	Q9H7E9		0	1.64487e+07	0.004	0.02805	35.01	0.0699938	2	942.573	-0.425251	48.2181	0	C1203	88.89	C1203	71.9	C1203	0.4
High	TVSDVLNSV	6	1	1	Q14746		0	1.89612e+07	0.004	0.03238	32.89	0.212069	2	933.489	-0.0377135	65.7504	0	C1203	44.44	A6802	4.1	A6802	0.01
High	STFSGIKEL	9	1	1	Q8N3U4		0	3.45814e+07	0.004	0.02703	32.78	0.124795	2	981.525	-0.608817	51.9551	0	C1203	85.19	C1203	31.9	C1203	0.15
High	QGFPNRVVF	43	1	1	P35579		0	2.50309e+08	0.004	0.03146	32.7	0.201602	2	1063.57	-1.36256	59.5826	0	C1203	48.15	B1503	44.9	B1503	1.1
High	AATPAVRTV	16	2	2	P11940;Q9H361		0	1.60657e+08	0.004	0.03113	31.74	0.218382	2	885.515	0.0859646	31.9597	0	C1203	96.3	C1203	70.3	C1203	0.4
High	SASKIIVFV	26	1	1	O15439		0	4.25826e+07	0.004	0.02583	31.55	0.0544827	2	963.587	-0.889266	61.7329	0	C1203	85.19	A6802	13.8	A6802	0.12
High	HAAKVILQV	26	1	1	Q63HN8		0	4.95633e+07	0.004	0.02642	30.39	0.0516474	2	978.609	-0.225597	36.757	0	C1203	85.19	A6802	25.5	A6802	0.25
High	LSKDGVLYV	18	1	1	Q9H1A4		0	9.93991e+07	0.004	0.02613	30.06	0.207365	2	993.561	-0.727369	51.9021	0	C1203	77.78	C1203	67.2	C1203	0.3
High	MTADSRSQV	40	1	1	P60900		0	2.93688e+08	0.004	0.02673	29.79	0.351072	2	994.462	-0.434113	24.478	0	C1203	74.07	A6802	3.8	A6802	0.01
High	DVAQIIIRI	12	1	1	Q7L622		0	8.26138e+07	0.004	0.0308	29.05	0.124576	2	1040.65	-0.49176	80.5464	0	C1203	40.74	A6802	61.8	A6802	0.6
High	YKKGDANTY	4	1	1	Q9NVX7		0	3.47949e+06	0.004	0.02743	29.04	0.475627	2	1059.51	-0.715497	18.978	0	C1203	48.15	B1503	21.1	B1503	0.6
High	STFFQETNI	1	1	1	Q8IYN6		0	1.70313e+07	0.004	0.03087	28.34	0.47623	2	1086.51	-0.0661432	72.5642	0	C1203	62.96	A6802	60.9	A6802	0.6
High	KSMFQRTTY	3	1	1	Q9Y262		0	1.19113e+07	0.004	0.02947	28.27	0.578915	2	1161.57	-1.21817	32.5475	0	C1203	70.37	B1503	18.9	B1503	0.5
High	FTAPATVSL	2	1	1	Q71RG4		0	7.85029e+06	0.004	0.03146	27.68	0.769017	2	906.493	-0.472061	68.5925	0	C1203	85.19	C1203	5.8	C1203	0.01
High	EVVSHTSQV	13	1	1	Q8IX04		0	1.05354e+08	0.004	0.02795	27.64	0.584833	2	985.494	-0.815947	25.4744	0	C1203	40.74	A6802	8.1	A6802	0.05
High	SAFPAVQYL	1	1	1	Q13227		0	13663891	0.004	0.02608	27.61	0.814108	2	995.519	-0.848676	81.6044	0	C1203	88.89	C1203	6.3	C1203	0.01
High	KLFPGSPAIY	12	7	7	P49792;P0DJD0;P0DJD1;A6NKT7;Q7Z3J3;Q99666;O14715		0	2.75478e+07	0.004	0.02757	27.54	0.60982	2	1092.61	-0.817809	63.3522	0	C1203	51.43	B1503	9.2	B1503	0.17
High	EAIGNPHHV	12	1	1	Q14146		0	5.12728e+07	0.004	0.02616	27.23	0.766967	2	973.485	-0.510158	22.0838	0	C1203	81.48	A6802	25.5	A6802	0.25
High	TVADVVLWSV	4	1	1	Q13155		0	8.21185e+07	0.004	0.02782	27.23	0.856475	2	1088.6	-0.234273	94.0103	0	C1203	31.43	A6802	5.2	A6802	0.02
High	LQQPRSLTY	9	1	1	P22102		0	33058757	0.004	0.0257	27.01	0.728686	2	1105.6	-0.807352	43.7399	0	C1203	51.85	B1503	2.4	B1503	0.01
High	NAFHHPSAV	12	1	1	P32314		0	1.30875e+07	0.004	0.02972	26.95	1.06842	2	979.474	-0.558206	25.457	0	C1203	81.48	C1203	16.1	C1203	0.06
High	EVYPGTYSV	14	1	1	Q9NQ31		0	7.05883e+07	0.004	0.03246	26.94	0.547631	2	1014.48	-0.701726	59.7933	0	C1203	48.15	A6802	2.4	A6802	0.01
High	ELMNILNKV	2	1	1	P04632		0	1.36991e+07	0.004	0.03211	26.71	0.706038	2	1073.6	-0.509556	69.1127	0	C1203	37.04	A6802	27.1	A6802	0.25
High	TTFPRPVTV	105	1	1	Q15233		0	3.92685e+09	0.004	0.02907	26.53	0.871093	2	1017.57	-0.899516	51.8163	0	C1203	88.89	C1203	11.7	C1203	0.03
High	TLAEIYVAA	3	1	1	P36956		0	19911543	0.004	0.02883	26.47	0.667368	2	950.519	-0.156401	69.7656	0	C1203	11.11	A6802	48.4	A6802	0.5
High	TAVTVNQSL	31	1	1	P05787		0	9.1842e+07	0.004	0.02949	26.24	1.02359	2	932.504	-0.483902	48.6458	0	C1203	74.07	C1203	436.7	C1203	1.5
High	NTFQFTNEA	2	1	1	O75534		0	1.63013e+07	0.004	0.03273	26.15	0.495999	2	1071.47	-0.258287	58.0938	0	C1203	37.04	A6802	6.4	A6802	0.04
High	TQLPESTSL	1	1	1	Q13564		0	5.75532e+06	0.004	0.03025	26.03	1.12606	2	975.499	-0.0370304	55.3391	0	C1203	44.44	B1503	15.3	B1503	0.4
High	ITAPIEAQV	6	1	1	P52756		0	1.80051e+07	0.004	0.03312	25.73	0.683889	2	941.53	-0.271303	60.8395	0	C1203	77.78	A6802	10.1	A6802	0.08
High	FASEVSNVL	5	1	1	Q92783		0	1.09272e+07	0.004	0.02847	25.26	1.47824	2	965.494	0.00181044	66.0867	0	C1203	88.89	C1203	7	C1203	0.01
High	GKVRTDITY	30	1	1	P62701		0	2.66879e+08	0.004	0.03245	25.25	0.858895	2	1052.57	-0.335923	30.5143	0	C1203	44.44	B1503	27.2	B1503	0.7
High	KKVERQTEL	12	2	2	P11940;Q9H361		0	1.82605e+07	0.004	0.0277	25.04	0.831574	2	1130.65	-0.406802	18.2958	0	C1203	44.44	B1503	209.3	B1503	3
High	ETFDFVHNV	24	1	1	Q96E29		0	75039004	0.004	0.03008	24.89	1.00416	2	1107.51	-0.261663	64.2425	0	C1203	77.78	A6802	1.9	A6802	0.01
High	TTFEHAHNMRV	14	1	1	P13639		0	3.22286e+07	0.004	0.02977	24.67	1.21209	3	1342.63	-0.103632	28.1264	0		0	A6802	103.8	A6802	0.8
High	RQYEQQTY	2	1	1	Q9Y262		0	1.27057e+08	0.004	0.0331	24.6	0.842917	2	1115.51	-0.526551	27.839	0	C1203	26.67	B1503	5.5	B1503	0.07
High	AKLPEIEEY	1	1	1	Q9BQ39		0	1.22011e+07	0.004	0.03062	24.29	1.37729	2	1091.56	-0.916683	54.2626	0	C1203	55.56	B1503	85	B1503	1.7
High	SAYPLSVEW	4	1	1	Q13610		0	4.14721e+07	0.004	0.03137	24.08	1.74569	2	1051.51	0.161533	83.7111	0	C1203	55.56	C1203	85.8	C1203	0.4
High	KKSKENVLY	11	1	1	P62191		0	4.38648e+06	0.004	0.02749	24.03	0.731824	2	1108.64	-0.409137	20.6414	0	C1203	44.44	B1503	32.1	B1503	0.8
High	HKIEAGNEF	12	1	1	O43293		0	2.94359e+07	0.004	0.03145	23.95	1.3938	2	1044.51	-0.719826	28.2174	0	C1203	37.04	B1503	13.9	B1503	0.4
High	RQKELESNY	3	1	1	Q13438		0	5.1885e+06	0.004	0.02771	23.84	1.51423	2	1166.58	-0.363334	23.2419	0	C1203	40.74	B1503	6.4	B1503	0.09
High	RKFLDGNEM	3	1	1	Q9Y696		0	1.72169e+07	0.004	0.0271	23.79	1.31512	2	1109.54	-0.487137	36.2593	0	C1203	37.04	B1503	10.8	B1503	0.25
High	KKHHSTIVY	3	1	1	Q5VT52		0	1.9776e+06	0.004	0.02965	23.63	0.96933	2	1112.62	-0.311123	19.0977	0	C1203	44.44	B1503	4.8	B1503	0.05
High	RKSLNSIEF	8	1	1	P78527		0	3.01715e+07	0.004	0.02776	23.58	1.32195	2	1093.6	-0.499631	39.6016	0	C1203	40.74	B1503	9.5	B1503	0.2
High	ETADVKASV	9	1	1	Q8N1F7		0	44715489	0.004	0.03127	23.48	1.92916	2	919.473	-0.420258	30.4226	0	C1203	74.07	A6802	2.2	A6802	0.01
High	SAFPEVRSL	18	1	1	Q6YHU6		0	2.45973e+07	0.004	0.03323	23.38	2.21012	2	1005.54	0.367428	56.2688	0	C1203	92.59	C1203	16.9	C1203	0.06
High	NKWEVPSVY	2	1	1	Q75QN2		0	1.78635e+07	0.004	0.02958	23.16	2.16121	2	1121.56	-0.392232	61.0014	0	C1203	48.15	B1503	25.5	B1503	0.7
High	EVFFDGVRV	4	1	1	P49748		0	1.97089e+07	0.004	0.02669	23.05	1.93696	2	1067.55	-0.258431	69.0517	0	C1203	44.44	A6802	8.9	A6802	0.06
High	EAADIIQKL	25	1	1	O00471		0	1.27305e+08	0.004	0.03073	22.43	1.88645	2	1000.57	-0.692918	57.0973	0	C1203	85.19	A6802	44.8	A6802	0.4
High	ETQKSIYYI	25	1	1	P08238		0	783566979	0.004	0.03161	22.4	2.23674	2	1144.59	-0.581123	52.33	0	C1203	62.96	A6802	12.3	A6802	0.1
High	SAYDPPRQI	13	1	1	P43268		0	3.60221e+07	0.004	0.03061	22.38	2.54998	2	1046.53	-0.732772	41.9728	0	C1203	81.48	C1203	35.9	C1203	0.17
High	AKAGILTTL	1	1	1	P33993		0	2.62186e+07	0.004	0.02568	22.16	0.853213	2	887.556	-0.221432	51.0668	0	C1203	51.85	B1503	81.1	B1503	1.6
High	ETQNVVTKV	14	1	1	Q96MW1		0	8.48943e+07	0.004	0.03183	22.02	2.65574	2	1017.56	0.301302	31.6024	0	C1203	70.37	A6802	22.4	A6802	0.25
High	ETNAVHVNV	2	1	1	Q2LD37		0	9.73401e+06	0.004	0.02835	21.91	2.47264	2	982.495	-0.356902	36.3866	0	C1203	70.37	A6802	3.2	A6802	0.01
High	EASFVLHTI	8	1	1	Q15418		0	1.0061e+07	0.004	0.02795	21.61	3.89916	2	1016.54	-0.336648	61.4131	0	C1203	74.07	A6802	7.6	A6802	0.05
High	NTIDPSHPM	15	1	1	P49588		0	6.11488e+07	0.004	0.03305	21.39	1.39231	2	1011.45	-1.4916	38.5202	0	C1203	62.96	A6802	9.3	A6802	0.07
High	QFTGIKKY	2	1	1	Q96IX5		0	23546292	0.004	0.02648	21.27	2.20016	2	984.55	-0.996122	43.3263	0	C1203	33.33	B1503	208.3	B1503	3
High	ELFTGFIKV	24	1	1	Q86TM6		0	5.11094e+07	0.004	0.02559	21.08	1.66767	2	1053.6	0.103227	79.2943	0	C1203	44.44	A6802	54.3	A6802	0.5
High	RQVGATVEF	17	1	1	Q13432		0	2.86969e+07	0.004	0.02812	20.88	3.43046	2	1006.53	-0.613833	45.0044	0	C1203	40.74	B1503	2.7	B1503	0.01
High	GKTISLTDF	3	1	1	P23588		0	6914297	0.004	0.03275	20.76	2.33664	2	981.525	-0.235712	59.5326	0	C1203	29.63	B1503	86.5	B1503	1.7
High	ETKFQVDKV	4	2	2	Q5JWF2;P63092		0	1.04051e+07	0.004	0.03265	18.54	4.88386	2	1093.59	0.0580531	33.7379	0	C1203	70.37	A6802	103.9	A6802	0.8
High	ETILETQKV	4	1	1	Q96Q89		0	1.16238e+07	0.004	0.03182	18.11	4.37771	2	1060.59	-0.655435	43.714	0	C1203	66.67	A6802	20.5	A6802	0.2
High	EASHITEQQL	3	1	1	Q9BV73		0	3.51693e+07	0.004	0.0327	17.95	5.49593	2	1155.56	-0.270862	36.915	0	C1203	62.86	A6802	218.9	A6802	1.3
High	EGYPGQRYY	3	1	1	P34896		0	1.09053e+07	0.004	0.03308	17.69	3.40261	2	1132.51	-0.45446	43.4854	0	C1203	51.85	C1203	213.1	C1203	0.9
High	AKWLQDEMF	2	1	1	Q14008		0	1.36176e+07	0.004	0.02915	17.58	6.77117	2	1167.55	0.0782303	69.1188	0	C1203	33.33	B1503	139.7	B1503	2.5
High	GMYGKIAVM	8	1	1	Q16531		0	1.32616e+07	0.004	0.03246	17.47	4.9931	2	969.489	-0.576586	53.7099	0	C1203	44.44	B1503	11.8	B1503	0.25
High	GKSSGPTSLF	3	1	1	Q00839		0	18580352	0.004	0.02647	16.7	8.11998	2	980.504	-0.345914	47.2329	0	C1203	34.29	B1503	75.7	B1503	1.5
High	DSFPYEFFQV	5	1	1	Q04864		0	7.82353e+06	0.004	0.03005	15.63	6.07366	2	1278.57	-0.0756691	106.074	0	C1203	57.14	A6802	16.8	A6802	0.15
High	GKMNPQSAF	1	1	1	P22307		0	1.09686e+07	0.004	0.03257	15.05	9.09845	2	979.467	-0.0939308	37.7529	0	C1203	29.63	B1503	6	B1503	0.08
High	HTVWIPWNV	4	1	1	Q9P273		0	28039314	0.004	0.02952	13.87	21.0353	2	1151.6	0.0848768	80.1357	0	C1203	70.37	A6802	3.7	A6802	0.01
High	NTFFSETGA	6	5	5	Q71U36;P68363;Q9BQE3;Q13748;Q6PEY2		0	1.97174e+07	0.005	0.03904	39.34	0.0227878	2	973.426	-0.372346	60.1117	0	C1203	33.33	A6802	15.5	A6802	0.15
High	QAYSGIQQY	2	2	2	Q92879;O95319		0	2.09595e+07	0.005	0.03749	36.84	0.0610071	2	1057.49	-0.222029	49.4896	0	C1203	85.19	B1503	12.6	C1203	0.15
High	TAFPFQVEV	4	1	1	A6NHR9		0	5.70295e+07	0.005	0.03865	35.85	0.125679	2	1037.53	0.63621	88.1542	0	C1203	92.59	A6802	9.9	C1203	0.05
High	EVAGIINDA	27	1	1	Q14008		0	1.88638e+08	0.005	0.03601	34.76	0.133795	2	901.462	-0.224516	55.3911	0	C1203	11.11	A6802	11.6	A6802	0.09
High	LKSPGSVVF	7	1	1	O75787		0	2.11754e+07	0.005	0.0344	34.45	0.104841	2	933.54	-0.445266	50.9407	0	C1203	48.15	B1503	4	B1503	0.03
High	KKRPKAESF	5	1	1	P13798		0	4.24745e+06	0.005	0.03481	34.28	0.058395	2	1090.64	-0.153141	17.252	0	C1203	37.04	B1503	30.1	B1503	0.8
High	ETITGQHPA	8	1	1	Q8WTW3		0	5.96031e+06	0.005	0.03565	33.7	0.147661	2	953.468	-0.240047	24.4641	0	C1203	29.63	A6802	13.6	A6802	0.12
High	EVFSSFAHA	7	1	1	O60502		0	8.0364e+07	0.005	0.03897	33.51	0.149629	2	994.463	0.149824	52.8637	0	C1203	7.41	A6802	6.6	A6802	0.04
High	KSIARVLTV	13	1	1	P42766		0	4.47648e+07	0.005	0.03587	33.43	0.0307318	2	986.635	-0.878786	38.2158	0	C1203	77.78	C1203	34.7	C1203	0.15
High	LTPSHIKAY	4	1	1	P50613		0	1.13491e+07	0.005	0.03533	32.38	0.249304	2	1029.57	-0.336068	31.8794	0	C1203	77.78	C1203	101.6	C1203	0.5
High	GKAFGDSSY	1	1	1	Q9H5H4		0	5.80427e+06	0.005	0.03954	32.31	0.144229	2	931.416	0.212347	31.852	0	C1203	40.74	B1503	12.2	B1503	0.3
High	KKVERQAEL	2	2	2	P0CB38;Q13310		0	3.42127e+06	0.005	0.03494	31.88	0.178699	2	1100.64	-0.139789	18.693	0	C1203	44.44	B1503	279	B1503	3.5
High	EVDPNIQAV	24	1	1	P05787		0	64013895	0.005	0.04037	31.15	0.262476	2	984.5	-0.0822218	55.8382	0	C1203	48.15	A6802	90.4	A6802	0.7
High	AAYDKVRKA	5	1	1	Q9NVM6		0	2.51712e+06	0.005	0.03602	31.09	0.184045	2	1021.58	-0.284285	19.4743	0	C1203	55.56	C1203	200.1	C1203	0.9
High	AAYPEIVAV	5	1	1	Q17RS7		0	2.07482e+07	0.005	0.04028	30.52	0.471967	2	932.509	-0.22389	72.6414	0	C1203	96.3	C1203	14.9	C1203	0.05
High	FKAIGTAY	2	1	1	Q9NXW2		0	5.06896e+06	0.005	0.03773	30.2	0.357597	2	870.472	-0.186041	43.2874	0	C1203	40	B1503	47	B1503	1.1
High	MALGHVIVL	1	1	1	Q9NVR2		0	11287705	0.005	0.03419	29.62	0.107179	2	952.565	-0.153728	69.3767	0	C1203	88.89	C1203	18.4	C1203	0.07
High	NVTSIMFLV	7	2	2	P29992;P50148		0	2.65204e+07	0.005	0.03625	29.45	0.39663	2	1023.55	-0.36991	97.6681	0	C1203	40.74	A6802	4	A6802	0.01
High	EAGPPQPMV	10	1	1	Q96AQ6		0	3.19622e+07	0.005	0.04073	29.37	0.483255	2	925.445	-0.164881	51.2214	0	C1203	81.48	A6802	438.7	A6802	2
High	FSETVITSV	9	1	1	Q9UBP4		0	2.68734e+08	0.005	0.03477	29.36	0.353485	2	982.509	-0.0503435	70.2058	0	C1203	74.07	C1203	65.1	C1203	0.3
High	TVADHIQKV	9	1	1	Q9Y678		0	1.12957e+07	0.005	0.03654	29.26	0.304446	2	1010.56	-0.409377	28.1221	0	C1203	48.15	A6802	15.5	A6802	0.15
High	FQRGNDVAF	8	1	1	P17931		0	1.74121e+07	0.005	0.03513	28.98	0.454293	2	1053.51	-0.688796	43.8719	0	C1203	40.74	B1503	2.9	B1503	0.01
High	ELSDVLIYL	7	1	1	Q9H773		0	5.97583e+07	0.005	0.04023	28.79	0.341159	2	1064.59	-0.45054	102.587	0	C1203	48.15	A6802	16.7	A6802	0.15
High	ELSNVLAAM	9	1	1	Q9Y3U8		0	2.27025e+07	0.005	0.03438	28.55	0.717454	2	947.487	-0.0859491	77.9858	0	C1203	33.33	A6802	96	A6802	0.8
High	IVTEIISEI	3	1	1	Q9BPX3		0	125438396	0.005	0.03664	28.39	0.399789	2	1016.59	-0.181453	83.7692	0	C1203	40.74	C1203	62.4	C1203	0.3
High	ALNPQNTVF	6	1	1	P08107		0	1.75531e+07	0.005	0.03784	28.38	0.752775	2	1003.52	-0.0835244	61.7697	0	C1203	44.44	B1503	13.8	B1503	0.4
High	DSSEIHFKV	22	1	1	P63165		0	102830730	0.005	0.03988	27.84	0.812731	2	1061.53	-0.871526	46.5046	0	C1203	74.07	A6802	12.9	A6802	0.12
High	TVFSHAQTVV	4	2	2	Q71UM5;P42677		0	1.69795e+07	0.005	0.03657	27.68	0.843914	2	1088.57	-0.100538	45.8615	0	C1203	37.14	A6802	100	A6802	0.8
High	SQVPTQMSF	2	1	1	Q8TEL6		0	1.75522e+07	0.005	0.03591	27.38	0.676397	2	1024.48	-0.354592	63.4948	0	C1203	37.04	B1503	2.5	B1503	0.01
High	LSFPTTKTY	7	1	1	P69905		0	19924082	0.005	0.03768	27.32	0.653648	2	1057.56	-0.36256	52.9249	0	C1203	85.19	B1503	9.7	C1203	0.03
High	GKAWGILTF	1	1	1	P82930		0	6.57539e+06	0.005	0.0356	27.18	0.56863	2	992.556	-0.356078	77.4317	0	C1203	44.44	B1503	9	B1503	0.17
High	YASNITSVL	5	2	2	Q13085;O00763		0	3.96734e+07	0.005	0.03419	26.09	0.672541	2	967.509	-0.192616	68.0867	0	C1203	85.19	C1203	4.4	C1203	0.01
High	ETSPHTFQL	4	1	1	Q69YN4		0	1.0409e+08	0.005	0.03892	25.19	1.17747	2	1059.51	-0.26408	48.7439	0	C1203	77.78	A6802	9	A6802	0.06
High	EVFEVVERV	1	1	1	P42694		0	5.54969e+06	0.005	0.0359	25.18	1.52347	2	1105.59	-0.172446	61.5223	0	C1203	48.15	A6802	4.5	A6802	0.01
High	RQLPAMTAL	11	1	1	Q13045		0	53607159	0.005	0.03869	24.75	0.788006	2	1000.56	0.150336	52.8028	0	C1203	44.44	B1503	4.8	B1503	0.05
High	TTSTRTYSL	6	1	1	P08670		0	1.51706e+07	0.005	0.0383	24.21	1.39759	2	1029.52	-0.322235	33.7273	0	C1203	70.37	A6802	84.9	A6802	0.7
High	FAMPYFIQV	7	1	1	Q00610		0	2.63348e+07	0.005	0.03408	23.94	1.55908	2	1115.56	-0.406738	99.8976	0	C1203	88.89	C1203	5.8	C1203	0.01
High	ELGGIIAEV	4	1	1	Q96RL7		0	1.77713e+07	0.005	0.03424	23.79	1.36777	2	900.503	-0.769546	77.3343	0	C1203	48.15	A6802	74	A6802	0.6
High	EVSRVLEQV	6	1	1	Q96R06		0	5.69149e+07	0.005	0.03572	23.1	1.98581	2	1058.58	-0.0654896	47.4188	0	C1203	40.74	A6802	5.6	A6802	0.03
High	RQHAKNRYY	1	1	1	O96000		0	1.86235e+06	0.005	0.03804	22.82	2.53649	3	1235.64	0.538112	17.436	0	C1203	40.74	B1503	3.8	B1503	0.03
High	GKAKPQNKF	2	1	1	Q8NE71		0	1.31648e+06	0.005	0.03406	22.49	1.43587	2	1017.58	-0.848892	16.8188	0	C1203	33.33	B1503	197.9	B1503	3
High	ETSPVLQKL	17	1	1	Q9NRR4		0	6.14575e+08	0.005	0.03891	22.09	1.72952	2	1014.58	-0.758288	47.0969	0	C1203	77.78	A6802	25.9	A6802	0.25
High	EIAAVIETV	26	1	1	Q7Z4G1		0	2.91551e+08	0.005	0.03933	21.86	2.05654	2	944.53	-0.438018	72.3195	0	C1203	48.15	A6802	4	A6802	0.01
High	VTFSGIHLL	3	1	1	Q8N3Z3		0	6.55549e+06	0.005	0.03631	21.7	2.91628	2	986.567	-0.349034	73.7373	0	C1203	81.48	C1203	35.6	C1203	0.17
High	YVASNQHEV	6	1	1	Q13127		0	9.54803e+06	0.005	0.03656	21.63	2.12029	2	1046.49	-0.0108903	25.7219	0	C1203	51.85	A6802	13.9	A6802	0.12
High	AKLKGIGEY	7	1	1	Q92620		0	0	0.005	0.04106	21.14	1.84168	2	978.562	-0.399872	32.3022	0	C1203	48.15	B1503	17.3	B1503	0.5
High	GKKGPQSLF	11	1	1	P46087		0	2.7226e+07	0.005	0.03874	21.04	2.41348	2	961.546	-0.226736	31.9347	0	C1203	33.33	B1503	99.4	B1503	1.9
High	DVASIKEKV	7	1	1	Q13601		0	16942447	0.005	0.03576	21	2.09822	2	988.566	-0.948294	33.8689	0	C1203	44.44	A6802	27.9	A6802	0.3
High	AKPEYISKTY	5	1	1	Q13823		0	1.18461e+07	0.005	0.04068	20.91	2.75483	3	1199.63	0.270331	31.0069	0	C1203	31.43	B1503	133.1	B1503	2.5
High	MRYVASYLL	1	1	1	P05387		0	1.06948e+07	0.005	0.03702	20.71	3.77376	2	1115.59	-0.189108	67.0124	0	C1203	40.74	B1503	28.5	C1203	0.4
High	KKIRTSPTF	8	1	1	P62750		0	2.01922e+07	0.005	0.03893	20.41	1.27297	2	1077.64	-0.928669	23.2665	0	C1203	33.33	B1503	4.7	B1503	0.05
High	KKIEFGVVY	1	1	1	P29218		0	9.24712e+06	0.005	0.03452	20.28	1.79824	2	1082.62	-0.848444	48.5386	0	C1203	48.15	B1503	3.5	B1503	0.03
High	HSAGYILGSVNV	2	1	1	Q13115		0	1.04602e+07	0.005	0.03363	19.89	4.3821	2	1216.63	0.222349	61.5589	0		0	A6802	269.6	A6802	1.5
High	GQFASDVQF	1	1	1	Q02833		0	1.46552e+07	0.005	0.03554	19.71	2.42675	2	998.459	1.08027	66.4609	0	C1203	37.04	B1503	3.7	B1503	0.03
High	EVIAVSEKV	3	1	1	Q14865		0	15168594	0.005	0.03362	19.64	3.5575	2	973.557	0.13958	45.6274	0	C1203	37.04	A6802	4.5	A6802	0.01
High	EVSQVKETL	24	1	1	P30622		0	2.70051e+08	0.005	0.03927	19.63	3.89184	2	1032.56	-1.21591	37.0655	0	C1203	44.44	A6802	88.6	A6802	0.7
High	KHADPRIQGY	1	1	1	Q9BW60		0	3.81855e+06	0.005	0.04104	19.4	4.03289	2	1184.62	0.302156	25.4503	0	C1203	42.86	B1503	102.8	B1503	1.9
High	SVFGQVERA	2	1	1	Q15233		0	8037287	0.005	0.0343	19.32	4.88032	2	992.517	0.755586	43.1286	0	C1203	11.11	A6802	160.3	A6802	1.1
High	HQFLSEQF	15	1	1	Q8TDB6		0	2.41818e+07	0.005	0.03445	19.22	4.24544	2	1035.49	-0.258775	55.8514	0	C1203	36.67	B1503	25.2	B1503	0.7
High	RKAPQHTAV	6	1	1	O43242		0	8.51127e+06	0.005	0.03983	18.8	2.80195	2	1007.57	-0.505265	16.6746	0	C1203	48.15	B1503	104	B1503	1.9
High	KKFKGDLAY	10	2	2	Q96K31;Q96EF9		0	2.1555e+07	0.005	0.03657	17.7	4.62941	2	1069.6	-0.731315	25.7278	0	C1203	44.44	B1503	3.4	B1503	0.02
High	ESSPFVERL	26	1	1	P14625		0	3.00611e+08	0.005	0.03407	17.59	8.80135	2	1063.54	-0.558451	54.0106	0	C1203	81.48	A6802	108.2	A6802	0.8
High	EVVAGSHEL	3	1	1	Q01082		0	1.25148e+07	0.005	0.03401	17.39	6.04257	2	940.473	-0.307473	34.1743	0	C1203	40.74	A6802	25.7	A6802	0.25
High	EVVHTPETSV	16	1	1	O15427		0	7.00239e+07	0.005	0.03688	17.22	5.79823	2	1097.55	-0.964928	38.9277	0	C1203	25.71	A6802	83.1	A6802	0.7
High	EVFGLFQKL	20	1	1	P15924		0	5.05166e+07	0.005	0.03682	17.13	4.69873	2	1080.61	0.0675707	78.8564	0	C1203	44.44	A6802	30.7	A6802	0.3
High	EAVSFQHFI	11	1	1	Q99598		0	2.73785e+07	0.005	0.0401	16.63	9.43604	2	1077.54	-0.327561	66.6386	0	C1203	70.37	A6802	6.7	A6802	0.04
High	YKKELEKTY	3	1	1	P02545		0	7.637e+06	0.005	0.03886	16.55	8.70853	3	1201.65	0.477641	23.0328	0	C1203	51.85	B1503	32.8	B1503	0.8
High	KKIPSTVEF	17	1	1	Q9H2G9		0	3.57082e+07	0.005	0.03702	15.13	7.57435	2	1048.6	-0.198432	37.7221	0	C1203	44.44	B1503	4.6	B1503	0.04
High	KKLQQTQEY	4	2	2	P42229;P51692		0	3435509	0.005	0.04009	13.44	14.9569	2	1165.62	0.0618718	21.0302	0	C1203	40.74	B1503	22.7	B1503	0.6
High	TSMDKTFKV	3	1	1	Q64LD2		0	1.93998e+07	0.005	0.03375	13.24	16.1479	2	1056.54	-0.332407	37.1716	0	C1203	70.37	A6802	16.3	A6802	0.15
High	SLFVSNHAY	4	1	1	P04075		0	2.04376e+07	0.005	0.03694	12.5	21.5011	2	1037.5	-0.508046	50.1315	0	C1203	40.74	B1503	7.2	B1503	0.12
High	EASSVKNEL	9	1	1	Q9P2D1		0	2.37913e+07	0.005	0.03378	12.16	28.5185	2	976.494	-0.183243	29.9788	0	C1203	85.19	A6802	223.2	A6802	1.3
High	NKAEVHESY	6	1	1	Q15067		0	1.73552e+06	0.005	0.03837	11.66	21.4596	2	1076.5	-0.0774265	20.848	0	C1203	44.44	B1503	115.1	B1503	2
High	SQARTLITF	1	1	1	Q8N1F7		0	1.61031e+07	0.005	0.0347	11.52	19.5764	2	1036.58	-0.658746	55.989	0	C1203	40.74	B1503	2.9	B1503	0.01
High	EVAKVIVSm	5	1	1	Q99996	M9(Oxidation)	0	8.62825e+06	0.005	0.03666	10.08	32.9524	2	991.55	0.365973	38.2574	0	C1203	40.74	A6802	21.5	A6802	0.2
High	ELANLYHHV	11	1	1	Q8TD16		0	2.41296e+07	0.006	0.04576	42.95	0.0186192	2	1095.56	-0.814859	40.0344	0	C1203	40.74	A6802	11.9	A6802	0.1
High	SATETINKL	18	1	1	P15924		0	3.70395e+07	0.006	0.0431	34.87	0.0960241	2	976.531	-0.373862	35.983	0	C1203	81.48	C1203	193.6	C1203	0.8
High	STASILASV	5	1	1	O60716		0	3.55215e+07	0.006	0.0472	34.39	0.0803524	2	848.472	-0.0148821	66.2332	0	C1203	74.07	A6802	2.4	A6802	0.01
High	KKAKAGEKY	1	1	1	P09884		0	178481	0.006	0.04716	31.75	0.113485	2	1022.6	-0.357631	15.4823	0	C1203	40.74	B1503	70.5	B1503	1.5
High	ETDPGMVHL	4	1	1	Q9NZN8		0	3.87636e+07	0.006	0.04287	31.18	0.210334	2	998.461	-0.471067	51.4272	0	C1203	77.78	A6802	175.2	A6802	1.2
High	VAFPKSLVA	26	1	1	Q8IWI9		0	8.48704e+07	0.006	0.0418	30.66	0.200494	2	931.561	-0.433381	57.761	0	C1203	59.26	C1203	63.6	C1203	0.3
High	TVMGKIFAV	2	1	1	Q9P2G9		0	8.6886e+06	0.006	0.04921	30.48	0.185251	2	965.548	-0.668975	63.9349	0	C1203	44.44	A6802	3.8	A6802	0.01
High	ETADITHAL	18	1	1	Q15042		0	9.39379e+07	0.006	0.04615	30.32	0.298523	2	970.484	-0.298911	46.3742	0	C1203	74.07	A6802	2.4	A6802	0.01
High	EVPPPFTLV	28	1	1	Q8NI35		0	177613862	0.006	0.04165	29.59	0.294808	2	998.556	-0.233081	87.7023	0	C1203	44.44	A6802	6.1	A6802	0.03
High	EVASNVPKV	6	1	1	Q9Y5A9		0	1.53872e+07	0.006	0.04806	29.58	0.36125	2	942.525	-0.0233851	36.9137	0	C1203	48.15	A6802	12	A6802	0.1
High	TSSRVIQSV	6	1	1	O75061		0	1.39011e+07	0.006	0.04844	29.1	0.399407	2	976.542	0.00162995	31.6156	0	C1203	74.07	A6802	64.4	A6802	0.6
High	AAAATGRLL	3	1	1	Q06481		0	6755095	0.006	0.04336	28.96	0.415859	2	843.504	-0.559897	35.0699	0	C1203	85.19	C1203	131.4	C1203	0.6
High	LKSGGVNQY	7	1	1	Q15021		0	1.13857e+07	0.006	0.04873	28.64	0.483355	2	965.503	-2.01026	26.3264	0	C1203	48.15	B1503	22.1	B1503	0.6
High	SQGPTLQF	1	1	1	Q15022		0	8.60546e+06	0.006	0.04283	28.17	0.944608	2	877.441	-0.0552589	62.911	0	C1203	33.33	B1503	78.2	B1503	1.6
High	ITTDVLYTI	4	1	1	P14866		0	7.40084e+07	0.006	0.048	26.87	0.564548	2	1038.57	-0.310589	81.8639	0	C1203	66.67	A6802	23.2	A6802	0.25
High	AAAGLHSNV	11	1	1	Q9UJX3		0	6.14083e+06	0.006	0.04257	26.48	0.933133	2	839.437	0.251505	24.4978	0	C1203	85.19	A6802	163.7	A6802	1.1
High	ESAGPSRAV	4	1	1	P50402		0	7.06059e+06	0.006	0.04484	26.31	1.08955	2	873.442	-0.173937	22.7169	0	C1203	77.78	A6802	15	A6802	0.15
High	ESAPIGIRV	10	1	1	O75054		0	3.84874e+07	0.006	0.04889	25.6	0.682222	2	941.541	-0.281422	50.9995	0	C1203	81.48	A6802	7	A6802	0.04
High	TTTHITKTV	18	2	2	O43491;Q9Y2J2		0	3.50136e+07	0.006	0.04561	25.47	1.22953	2	1001.56	-0.0636019	21.5618	0	C1203	74.07	A6802	19.2	A6802	0.17
High	GQVKTGISM	3	1	1	Q8TCN5		0	6.93043e+06	0.006	0.04303	25.07	1.56364	2	920.487	-0.181746	35.1324	0	C1203	33.33	B1503	6	B1503	0.08
High	EVDEQMLNV	4	4	4	Q13885;Q9BVA1;P68371;P07437		0	1.75335e+07	0.006	0.04886	23.45	1.23221	2	1076.49	-0.174567	65.9397	0	C1203	44.44	A6802	186.4	A6802	1.2
High	VKAPSSQTF	5	1	1	Q86TC9		0	1.1778e+07	0.006	0.04788	23.28	2.17044	2	964.51	0.0767167	35.2344	0	C1203	48.15	B1503	4.5	B1503	0.04
High	RKPEGGPSF	1	1	1	P59923		0	3.00909e+06	0.006	0.04852	23.25	2.14006	2	974.505	-0.670042	24.5036	0	C1203	33.33	B1503	49.4	B1503	1.1
High	ARAGVVLEM	8	1	1	Q9UKP3		0	2.46947e+07	0.006	0.04251	22.25	2.06576	2	945.518	-0.341775	49.488	0	C1203	51.85	B1503	49.4	C1203	1
High	SKKFGDMSY	5	1	1	Q16890		0	1.95585e+07	0.006	0.04542	21.96	2.41218	2	1062.49	-0.595216	34.6164	0	C1203	37.04	B1503	9.9	B1503	0.2
High	STVSIQIKL	1	1	1	O60502		0	1.24184e+07	0.006	0.04498	21.3	0.725743	2	988.603	-0.447315	63.1942	0	C1203	74.07	A6802	100.4	A6802	0.8
High	HQNSNIRTY	2	1	1	Q7RTS9		0	1.3754e+06	0.006	0.04915	21.1	2.90045	2	1132.55	-0.472895	21.0351	0	C1203	51.85	B1503	3.6	B1503	0.03
High	KKEGGTVVY	9	1	1	P49419		0	6.33279e+06	0.006	0.04122	20.68	2.3711	2	980.541	-0.100023	21.7022	0	C1203	48.15	B1503	26.8	B1503	0.7
High	KKSRFGNAF	3	1	1	Q6P2Q9		0	8.72031e+06	0.006	0.04472	20.46	2.18938	2	1054.58	-0.366288	23.4843	0	C1203	33.33	B1503	5.7	B1503	0.07
High	KKIEDNNTL	21	1	1	P62750		0	2.43915e+08	0.006	0.04681	20.37	3.94699	2	1074.58	-0.3261	22.5175	0	C1203	44.44	B1503	104.6	B1503	1.9
High	GQRPTQPVY	14	1	1	Q9H0W8		0	3.44591e+07	0.006	0.04157	20.21	4.06129	2	1045.54	-0.0222205	30.7244	0	C1203	48.15	B1503	4.7	B1503	0.05
High	VKRKGDLSL	1	1	1	Q12899		0	6.48127e+06	0.006	0.04432	19.46	1.53327	2	1015.63	-0.189356	22.2321	0	C1203	44.44	B1503	86	B1503	1.7
High	DVIRHYGEHV	3	1	1	Q9BQG0		0	7.04703e+06	0.006	0.04823	19.41	4.67484	3	1224.61	0.500334	31.0281	0	C1203	25.71	A6802	229.5	A6802	1.4
High	TAAPPAQPL	8	1	1	P25440		0	2.38316e+07	0.006	0.04906	19.31	4.08217	2	865.478	0.0583921	44.246	0	C1203	85.19	C1203	72	C1203	0.4
High	QERPSVTSY	10	1	1	Q9UJX3		0	2.32385e+07	0.006	0.04775	18.37	4.94419	2	1066.52	-0.673878	33.7557	0	C1203	48.15	B1503	17	B1503	0.5
High	QTHSVFVNV	5	1	1	Q9Y3A5		0	1.11599e+08	0.006	0.04936	18.06	6.85987	2	1030.53	-0.461676	47.163	0	C1203	74.07	A6802	6.2	A6802	0.03
High	EVFLKAFAV	12	1	1	O95373		0	1.56261e+07	0.006	0.04702	17.8	3.46771	2	1023.59	-0.0717358	73.5137	0	C1203	40.74	A6802	5.6	A6802	0.03
High	KVPPFTFHV	12	1	1	Q6NZI2		0	9.3819e+07	0.006	0.04376	16.85	4.78962	2	1071.6	-0.51441	56.1985	0	C1203	44.44	A6802	46.2	A6802	0.5
High	QTYGYEHIL	4	1	1	Q96AX1		0	2.44951e+07	0.006	0.04757	16.77	8.60551	2	1123.54	0.0502126	55.8496	0	C1203	74.07	A6802	117	A6802	0.9
High	EAFHYIFNV	3	1	1	Q9UEY8		0	6.70901e+08	0.006	0.04871	16.06	10.0744	2	1139.55	1.1768	75.2079	0	C1203	81.48	A6802	3.5	A6802	0.01
High	KAKGVWSTL	5	1	1	Q96MU7		0	1.75851e+07	0.006	0.04485	15.89	6.44982	2	989.578	-0.394196	36.9229	0	C1203	81.48	C1203	225.1	C1203	0.9
High	IGVEHVVVY	2	1	1	P49411		0	1.93775e+08	0.006	0.04741	15.74	10.8581	2	1014.56	-1.09774	54.6664	0	C1203	51.85	B1503	20	C1203	0.4
High	KKKHGDKKF	1	1	1	P57071		0	141541	0.006	0.04909	15.51	4.37391	2	1115.67	-0.0526503	15.4478	0	C1203	33.33	B1503	342	B1503	4
High	EIYKEFFEV	2	1	1	O00255		0	1.20686e+07	0.006	0.04251	15.43	10.639	2	1203.59	-0.568635	74.7435	0	C1203	44.44	A6802	7.5	A6802	0.05
High	AQPETRVSY	2	1	1	Q5SWA1		0	4.91458e+07	0.006	0.04218	14.88	13.4684	2	1050.52	-0.881362	34.0215	0	C1203	48.15	B1503	10.6	B1503	0.25
High	NMSMDFQNHL	5	1	1	P00533		0	2.1959e+07	0.006	0.04502	13.72	3.69419	2	1236.51	0.0470466	33.4889	0	C1203	28.57	A6802	204.6	A6802	1.3
High	RKKAKVDEF	2	2	2	Q96L21;P27635		0	4.3646e+06	0.006	0.04776	12.9	9.22894	2	1120.65	-0.75789	18.3936	0	C1203	37.04	B1503	62.2	B1503	1.4
High	KGYPSEFATY	1	1	1	P48730		0	9.80212e+06	0.006	0.04844	12.28	18.4893	2	1162.54	-0.516237	50.9759	0	C1203	34.29	B1503	28.3	B1503	0.7
High	RKLDQVSQF	2	1	1	O60502		0	4.46549e+07	0.006	0.04756	11.89	21.346	2	1120.61	-0.410552	35.0944	0	C1203	37.04	B1503	10.3	B1503	0.25
High	EASKVHNEI	3	1	1	Q96QT4		0	1.41873e+07	0.006	0.04865	10.32	32.7832	2	1026.52	-0.436043	20.5063	0	C1203	74.07	A6802	71.4	A6802	0.6
High	TATEIAINV	2	1	1	Q86XP1		0	5.06995e+06	0.007	0.05493	44.34	0.0157835	2	931.509	-0.418099	64.4528	0	C1203	81.48	A6802	21.8	A6802	0.2
High	ETIGTGGFAKV	8	1	1	Q14680		0	2.52573e+08	0.007	0.05047	39.09	0.0471724	2	1079.57	-0.37959	49.8136	0		0	A6802	21.3	A6802	0.2
High	RKGAGSVF	8	1	1	P62917		0	5.71395e+07	0.007	0.05283	37.74	0.0406702	2	821.463	0.0193418	22.5107	0	C1203	36.67	B1503	126.3	B1503	2.5
High	GAYEQVIKY	20	1	1	P98194		0	7.18072e+07	0.007	0.04956	34.5	0.141517	2	1070.55	-0.596245	50.6641	0	C1203	88.89	B1503	35.1	C1203	0.5
High	AAFDKIQQL	10	1	1	Q9P2I0		0	4.78895e+07	0.007	0.05394	34.12	0.153025	2	1033.57	-0.635759	54.8661	0	C1203	88.89	C1203	26.1	C1203	0.1
High	STFEDVTQV	18	1	1	Q14247		0	3.89216e+07	0.007	0.05508	33.49	0.147678	2	1025.48	0.181441	61.4395	0	C1203	77.78	A6802	14.1	A6802	0.12
High	KKSEGSLAY	6	1	1	Q96KP1		0	1.06159e+07	0.007	0.05128	31.57	0.208431	2	982.52	-0.29835	22.3819	0	C1203	48.15	B1503	5.5	B1503	0.07
High	DVTAIIFVV	12	2	2	Q5JWF2;P63092		0	2.5463e+08	0.007	0.05257	31.52	0.13664	2	976.571	-0.263928	107.212	0	C1203	44.44	A6802	14.6	A6802	0.12
High	EIAKVTEGV	12	1	1	A0AV96		0	1.52826e+07	0.007	0.05286	29.39	0.458249	2	945.525	-0.190711	38.872	0	C1203	40.74	A6802	3	A6802	0.01
High	RQYPTPFQL	4	1	1	Q8ND82		0	1.48112e+07	0.007	0.05568	27.42	0.651267	2	1149.6	-0.21338	63.1387	0	C1203	51.85	B1503	7.2	B1503	0.12
High	KKVSKAAIL	9	1	1	O00767		0	6.26924e+06	0.007	0.05192	26.61	0.0476926	2	957.645	-0.218238	20.8849	0	C1203	40.74	B1503	65.6	B1503	1.4
High	GKSSLIVSY	11	1	1	Q96L33		0	2.36291e+07	0.007	0.0508	26.52	0.469977	2	953.53	-0.118894	46.6215	0	C1203	51.85	B1503	12.6	B1503	0.3
High	AAIDHQIEV	6	1	1	Q9Y485		0	5.38623e+07	0.007	0.05143	25.72	0.990355	2	995.515	-0.315291	44.466	0	C1203	88.89	C1203	35.4	C1203	0.17
High	KQFGNILIL	6	1	1	P52788		0	2.97652e+07	0.007	0.05485	25.7	0.289205	2	1045.64	-0.293583	71.9376	0	C1203	51.85	B1503	4.3	B1503	0.04
High	SFmILIISY	1	1	1	Q6IEV9	M3(Oxidation)	0	1.02021e+07	0.007	0.05516	25.57	1.06773	2	1102.58	-3.0651	99.4973	0	C1203	44.44	B1503	345.2	B1503	4
High	SASPIFTHV	6	1	1	Q9HCG8		0	2.5419e+07	0.007	0.055	24.87	1.54495	2	958.499	-0.357156	50.5544	0	C1203	85.19	A6802	14	A6802	0.12
High	AAINFQPKM	5	1	1	Q96RK4		0	3.07434e+07	0.007	0.05623	24.72	1.33347	2	1019.53	-1.1698	53.7966	0	C1203	70.37	B1503	217.6	C1203	1.2
High	GKIIKPLQY	9	1	1	Q13823		0	4.58855e+07	0.007	0.05484	24.52	0.292965	2	1059.66	-0.64945	38.4462	0	C1203	44.44	B1503	92.9	B1503	1.8
High	MTNEKTTKV	2	1	1	P46013		0	1.11629e+06	0.007	0.05601	23.74	1.88489	2	1051.54	-0.519205	17.8332	0	C1203	70.37	A6802	17.1	A6802	0.15
High	EVFPEFAAA	13	1	1	O15294		0	2.57471e+07	0.007	0.05103	23.58	1.94598	2	980.472	-0.0332768	77.0945	0	C1203	11.11	A6802	7.5	A6802	0.05
High	AKYLDEDTIY	2	1	1	P31153		0	1.76442e+07	0.007	0.05271	22.91	1.56677	2	1230.59	0.118282	55.5091	0	C1203	34.29	B1503	39.2	B1503	1
High	RSVDIINML	3	1	1	Q709C8		0	1.4117e+07	0.007	0.05448	21.45	2.5953	2	1060.58	0.188216	72.0464	0	C1203	74.07	C1203	58.2	C1203	0.3
High	SQVPRSSSM	5	1	1	Q9H992		0	7.01979e+06	0.007	0.05479	21.36	2.94357	2	978.467	-0.642737	24.8422	0	C1203	37.04	B1503	3.5	B1503	0.02
High	NTSSTNHQL	2	1	1	Q9H992		0	5.60205e+06	0.007	0.05369	20.36	2.32045	2	1001.46	-0.034042	19.4159	0	C1203	74.07	A6802	55.8	A6802	0.5
High	ETFDQISKV	5	1	1	Q9H8L6		0	2.13471e+07	0.007	0.05291	18.83	5.25964	2	1066.54	0.334179	50.2167	0	C1203	77.78	A6802	5	A6802	0.02
High	HQMTPSSSY	4	1	1	Q93074		0	8.63682e+06	0.007	0.05188	17.1	2.95694	2	1037.43	-0.799325	29.563	0	C1203	37.04	B1503	2.1	B1503	0.01
High	HSAPFSWET	16	1	1	Q9H425		0	7.34348e+07	0.007	0.0519	16.45	4.13524	2	1061.47	-0.388125	53.5317	0	C1203	44.44	A6802	94.4	A6802	0.8
High	HTSDEQNHL	2	2	2	Q09028;Q16576		0	1.63773e+06	0.007	0.05548	14.44	7.45041	2	1080.47	-0.334047	18.1744	0	C1203	74.07	A6802	485.9	A6802	2.5
High	SKMGKQLTY	6	1	1	O00115		0	1.24943e+07	0.007	0.05318	14.36	12.5761	2	1055.55	-1.0065	26.8788	0	C1203	48.15	B1503	7.8	B1503	0.15
High	RHKDRDYLF	2	1	1	Q9UBK8		0	8.5551e+06	0.007	0.05349	12.97	22.3918	3	1249.64	-0.261355	28.4986	0	C1203	33.33	B1503	199	B1503	3
High	ALCDIKQAY	1	1	1	P25789		0	2.29107e+07	0.007	0.04988	12.24	18.2842	2	1024.51	-1.31075	50.7462	0	C1203	44.44	B1503	144	B1503	2.5
High	EVDATSKYSV	5	1	1	Q9UK61		0	8.96635e+06	0.007	0.05464	11.64	25.6715	2	1098.53	-1.07629	37.8626	0	C1203	25.71	A6802	45.3	A6802	0.4
High	LQHPDVAAY	1	1	1	P35221		0	1.65963e+07	0.007	0.05031	10.63	32.0211	2	1013.5	-0.710609	42.4389	0	C1203	48.15	B1503	2.4	B1503	0.01
High	AAFDGGFTV	1	1	1	Q86WA8		0	5.81222e+06	0.008	0.0624	47.69	0.00511924	2	884.415	0.543339	72.1643	0	C1203	88.89	C1203	14.7	C1203	0.05
High	GKMDPVAY	6	1	1	P47897		0	1.59619e+07	0.008	0.05681	34.97	0.128817	2	880.423	-0.87153	38.3638	0	C1203	26.67	B1503	101	B1503	1.9
High	ETSDILHRM	9	1	1	Q9UHD2		0	2.52557e+07	0.008	0.05976	32.6	0.177584	2	1101.53	-0.736783	39.555	0	C1203	66.67	A6802	12.8	A6802	0.12
High	KLAPPSSTL	9	1	1	Q7Z3B3		0	2.94573e+07	0.008	0.06226	28.52	0.351723	2	913.533	-2.16577	41.5796	0	C1203	51.85	B1503	63	C1203	1.2
High	KQADPFASL	3	1	1	Q5SR56		0	1.97181e+07	0.008	0.05995	26.5	1.33551	2	976.51	-0.0594733	54.5302	0	C1203	44.44	B1503	5.9	B1503	0.08
High	VVKPPGSSL	5	1	1	Q92560		0	5.59188e+07	0.008	0.06201	23.84	0.74142	2	883.524	-0.373095	35.8414	0	C1203	48.15	C1203	243.9	C1203	1
High	ESFGNEIYTV	2	1	1	O43148		0	2.08638e+07	0.008	0.06094	23.82	1.0934	2	1158.53	0.138485	71.8271	0	C1203	57.14	A6802	9.1	A6802	0.07
High	SKSGGDYAY	7	3	3	Q9GIP4;Q8MH63;Q01650		0	9.9955e+06	0.008	0.06139	23.57	0.961717	2	947.41	-0.399496	25.6105	0	C1203	44.44	B1503	26	B1503	0.7
High	SKTGGYLVY	6	1	1	P46087		0	2.39098e+07	0.008	0.05948	21.25	3.81996	2	987.514	-0.141167	45.5475	0	C1203	48.15	B1503	7.4	B1503	0.12
High	VKNLNGKSY	2	1	1	Q9HB71		0	800980	0.008	0.06166	21.06	2.38202	2	1022.56	-0.693236	21.3825	0	C1203	44.44	B1503	25.6	B1503	0.7
High	ESFIKAIGV	13	1	1	Q9NRN7		0	1.96417e+07	0.008	0.06105	20.97	2.28993	2	963.551	-0.379385	64.2061	0	C1203	74.07	A6802	10.4	A6802	0.08
High	FTADKYHVV	4	1	1	Q8TED0		0	1.8718e+07	0.008	0.06105	18.58	5.89302	2	1079.55	-1.69775	38.825	0	C1203	81.48	A6802	4.6	A6802	0.01
High	RQYGTISH	1	1	1	Q06481		0	1.96544e+06	0.008	0.05852	16.15	12.0554	2	961.485	-0.432244	21.7693	0	C1203	0	B1503	49.7	B1503	1.1
High	ETFGFRGEAL	2	2	2	A4D2B8;P54278		0	1.67768e+07	0.008	0.06048	15.64	10.306	2	1126.55	-1.00125	60.3928	0	C1203	60	A6802	15.6	A6802	0.15
High	NLAGVYSEV	1	1	1	Q9Y295		0	2.64746e+06	0.008	0.06136	14.66	17.5812	2	951.479	0.295213	63.13	0	C1203	48.15	A6802	21.4	A6802	0.2
High	ETYRGGMAI	2	1	1	Q13057		0	2.27077e+07	0.008	0.05691	14.18	11.3151	2	997.476	-0.88862	41.6279	0	C1203	62.96	A6802	11.1	A6802	0.09
High	DVATITKTVV	4	1	1	P57740		0	3.46494e+07	0.008	0.06192	13.39	6.58121	2	1046.61	-0.652769	55.8508	0	C1203	31.43	A6802	54.6	A6802	0.5
High	KKYPEKLYF	3	1	1	Q9ULK4		0	1.50923e+07	0.008	0.06263	12.93	16.5201	3	1215.68	0.0238107	37.0882	0	C1203	44.44	B1503	7.5	B1503	0.12
High	ETHFTGNEV	5	1	1	Q9BX74		0	1.02536e+09	0.008	0.05899	11.85	14.9142	2	1033.46	-1.07043	33.4111	0	C1203	70.37	A6802	11.7	A6802	0.1
High	ESIRFFVNV	2	1	1	Q8NBS3		0	6.20651e+06	0.008	0.05696	10.77	28.0195	2	1110.59	0.232957	73.5906	0	C1203	70.37	A6802	3.4	A6802	0.01
High	HSAAPSPQV	11	1	1	Q92614		0	2.73772e+07	0.009	0.06282	31.63	0.295474	2	893.447	-0.447868	27.0472	0	C1203	70.37	A6802	31.7	A6802	0.3
High	YVTSILQSL	3	1	1	Q69YN4		0	4.81626e+07	0.009	0.06282	31.3	0.182436	2	1023.57	-2.42643	85.0573	0	C1203	44.44	C1203	20.8	C1203	0.08
High	EAAELMQQV	15	1	1	Q15691		0	3.6158e+07	0.009	0.06388	31.11	0.287287	2	1018.49	-0.676853	58.7468	0	C1203	81.48	A6802	8.4	A6802	0.06
High	KAVGHPFVI	10	1	1	O14980		0	1.47419e+08	0.009	0.06732	30.92	0.111493	2	967.571	-0.984494	40.3297	0	C1203	77.78	C1203	67.5	C1203	0.3
High	EISGIVEVV	2	1	1	P35244		0	2.31826e+07	0.009	0.06369	30.89	0.258587	2	944.529	-1.08421	74.6352	0	C1203	51.85	A6802	11.4	A6802	0.09
High	EVMSVIAQV	1	1	1	Q96QP1		0	1.19537e+07	0.009	0.06364	30.46	0.409271	2	975.518	-0.259868	72.6195	0	C1203	44.44	A6802	3	A6802	0.01
High	TTTHVTKTV	3	1	1	Q9H4G0		0	3.23368e+06	0.009	0.06382	27.05	0.871712	2	987.547	-0.348213	19.014	0	C1203	74.07	A6802	24.2	A6802	0.25
High	NTYGFPIIF	7	1	1	P11498		0	26379973	0.009	0.06669	24.63	1.28288	2	1071.55	-0.721201	101.066	0	C1203	74.07	C1203	39.9	C1203	0.2
High	KANPGAWIL	21	2	2	Q9NYU2;Q9NYU1		0	7.52844e+07	0.009	0.06632	24.51	0.780564	2	969.551	-0.879223	59.962	0	C1203	81.48	B1503	352.7	C1203	1.4
High	RKKKIEEAM	6	1	1	Q13435		0	2.80569e+06	0.009	0.06378	23.18	0.991731	2	1132.65	-0.393013	18.0431	0	C1203	29.63	B1503	200.9	B1503	3
High	FSQDHLVIY	7	1	1	Q9BW91		0	28647279	0.009	0.06742	22.66	2.51353	2	1121.56	-1.25403	60.2021	0	C1203	77.78	C1203	13.8	C1203	0.04
High	NIANHFFTV	10	1	1	Q16222		0	4.41764e+07	0.009	0.06491	22.3	2.53674	2	1062.54	-0.412991	64.1863	0	C1203	44.44	A6802	7.1	A6802	0.04
High	ETAPDSYKV	9	1	1	Q14244		0	3.38108e+08	0.009	0.06319	22.29	2.5479	2	1009.48	-0.373789	36.468	0	C1203	77.78	A6802	3.8	A6802	0.01
High	KKSSGEIVY	12	1	1	Q02543		0	1.24806e+08	0.009	0.0632	21.61	1.67694	2	1010.55	-0.883133	23.9209	0	C1203	51.85	B1503	9.5	B1503	0.2
High	RAYPDANLL	3	1	1	P24385		0	3.52548e+07	0.009	0.06378	21.21	3.35958	2	1032.55	-0.731117	52.6733	0	C1203	85.19	C1203	14.8	C1203	0.05
High	SKPKEKLVY	4	1	1	Q9BTY2		0	1.69498e+07	0.009	0.06802	20.51	1.36137	2	1091.64	-1.26639	22.2132	0	C1203	44.44	B1503	290.1	B1503	3.5
High	ETADTAHGV	2	1	1	Q5JSZ5		0	6.09043e+06	0.009	0.06882	19.6	2.66609	2	900.406	-0.115562	22.073	0	C1203	74.07	A6802	2.4	A6802	0.01
High	SKRTGVQTF	5	1	1	P53621		0	8.49014e+07	0.009	0.0662	19.22	3.86068	2	1023.56	-0.653196	23.0575	0	C1203	37.04	B1503	9	B1503	0.17
High	ATSSVFQEV	6	1	1	Q9BTE0		0	2.6736e+07	0.009	0.06646	18.31	5.65712	2	967.473	-0.0736354	60.145	0	C1203	81.48	A6802	24	A6802	0.25
High	KMYSTDDGVQF	2	1	1	Q15029		0	9.35998e+06	0.009	0.06597	18.26	2.99007	2	1290.57	-0.146579	53.0576	0		0	B1503	22.7	B1503	0.6
High	SARAGETRF	3	1	1	P13639		0	5.87036e+06	0.009	0.06612	17.96	6.61097	2	994.506	-0.433603	21.3963	0	C1203	66.67	B1503	86.8	B1503	1.7
High	TVFSHAQTV	14	2	2	Q71UM5;P42677		0	1.96083e+08	0.009	0.06991	17.85	8.24478	2	989.505	-0.0493362	36.2789	0	C1203	48.15	C1203	18	C1203	0.06
High	MTSKLLSDL	2	1	1	Q53EL6		0	7.20888e+06	0.009	0.06882	17.83	4.73435	2	1007.54	-0.277332	58.6663	0	C1203	70.37	A6802	110	A6802	0.8
High	ETVSDVLNSV	2	1	1	Q14746		0	1.33523e+07	0.009	0.06468	17.81	6.1901	2	1062.53	-1.00728	77.6176	0	C1203	42.86	A6802	3.6	A6802	0.01
High	YSADGHSIL	4	1	1	Q15269		0	2.03059e+07	0.009	0.06781	17.28	8.67903	2	962.457	-0.380526	46.382	0	C1203	77.78	C1203	13.9	C1203	0.04
High	ETQRQMAHV	5	1	1	Q09472		0	1.66907e+07	0.009	0.06531	16.14	8.36192	2	1099.53	-0.714963	21.6619	0	C1203	66.67	A6802	16.1	A6802	0.15
High	GKTTQVTQF	6	1	1	Q9H2U1		0	9.89283e+06	0.009	0.06615	16.02	7.82733	2	1009.53	-1.59541	33.0046	0	C1203	33.33	B1503	81.1	B1503	1.6
High	SAADIPINI	5	1	1	P21333		0	2.83758e+07	0.009	0.06444	15.06	9.9399	2	913.499	-0.291708	74.3606	0	C1203	81.48	C1203	41.7	C1203	0.2
High	VAHSPPSTL	9	1	1	Q03252		0	2.47376e+07	0.009	0.06343	14.35	14.9117	2	908.484	-0.013383	31.9488	0	C1203	88.89	C1203	44.8	C1203	0.2
High	YQTAPKAGY	5	1	1	Q96KR1		0	5.42465e+06	0.009	0.06427	13.64	16.9567	2	998.495	0.363682	30.9579	0	C1203	40.74	B1503	6.6	B1503	0.1
High	GKAKITGGY	1	1	1	Q9BQ69		0	1.19672e+06	0.009	0.06714	12.51	15.0669	2	894.504	-0.0684628	21.6672	0	C1203	40.74	B1503	78.9	B1503	1.6
High	KKRDIYDKY	1	1	1	O75190		0	1.6264e+06	0.009	0.06684	10.71	29.318	3	1228.67	0.330937	20.9904	0	C1203	40.74	B1503	160	B1503	2.5
Medium	QSAEIWEKL	6	1	1	Q7L4I2		0	2.03996e+07	0.01	0.07253	32.59	0.295618	2	1103.57	-0.362273	60.8977	0	C1203	74.07	A6802	204	A6802	1.3
Medium	ESSKVVKKV	8	1	1	Q2NL82		0	3.75761e+07	0.01	0.07387	31.04	0.0806722	2	1003.61	-0.729463	16.9022	0	C1203	77.78	A6802	219.2	A6802	1.3
Medium	YASGINVNL	1	1	1	A2VDJ0		0	1.73071e+07	0.01	0.07065	27.88	0.794037	2	950.494	0.0504568	65.3529	0	C1203	88.89	C1203	34.5	C1203	0.15
Medium	EVSLPSVEV	12	1	1	Q8IVF2		0	1.88027e+07	0.01	0.07116	27.26	0.585219	2	958.509	-0.4441	73.4914	0	C1203	48.15	A6802	7.5	A6802	0.05
Medium	SKTQVTVQY	2	2	2	Q00266;P31153		0	7.86645e+06	0.01	0.07466	26.67	0.655414	2	1053.56	-0.906593	35.2984	0	C1203	40.74	B1503	38.6	B1503	0.9
Medium	SASRVVQVV	1	1	1	P82909		0	1.76548e+07	0.01	0.07588	26.1	0.814104	2	944.552	-0.0493063	36.0372	0	C1203	85.19	C1203	85.3	C1203	0.4
Medium	AATKIINEV	8	1	1	P55145		0	1.06628e+07	0.01	0.07451	24.44	1.37136	2	958.557	0.17954	39.8352	0	C1203	85.19	C1203	257.8	C1203	1
Medium	RKKAAIQTF	1	1	1	Q96DI7		0	7.21969e+06	0.01	0.0743	23.03	0.392963	2	1062.64	-0.802237	21.9888	0	C1203	37.04	B1503	7.6	B1503	0.12
Medium	RALALVVTL	11	1	1	O00622		0	6.73324e+07	0.01	0.07467	22.37	0.332592	2	955.63	-0.256406	69.1222	0	C1203	85.19	B1503	40.2	C1203	0.6
Medium	RQGTPLIAF	8	1	1	Q2NL82		0	8.24779e+07	0.01	0.07104	21.63	2.04162	2	1002.57	-0.46068	60.6898	0	C1203	33.33	B1503	3.8	B1503	0.03
Medium	AKHTNFVEF	5	1	1	P53680		0	11692971	0.01	0.07421	21.08	3.16026	2	1092.55	-0.355775	39.9019	0	C1203	40.74	B1503	8	B1503	0.15
Medium	QVANVRFNV	5	1	1	P30154		0	1.0411e+08	0.01	0.07205	18.77	5.11644	2	1046.57	0.29543	51.0643	0	C1203	40.74	A6802	4.6	A6802	0.01
Medium	NQKEAVAY	3	1	1	Q03518		0	2.97751e+06	0.01	0.07277	18.6	6.32147	2	922.463	-0.0261381	25.6253	0	C1203	33.33	B1503	278.4	B1503	3.5
Medium	RKKSKTANY	1	1	1	O75386		0	337322	0.01	0.07121	17.93	2.76628	2	1095.63	-0.623386	15.5511	0	C1203	40.74	B1503	35.3	B1503	0.9
Medium	ETILISNNQV	1	1	1	Q9H9A6		0	1.86457e+07	0.01	0.07396	15.58	11.8079	2	1130.61	-0.0629417	62.2082	0	C1203	40	A6802	7	A6802	0.04
Medium	RKRPVPKGATY	15	1	1	P61313		0	6.62103e+07	0.01	0.07492	15.29	4.8822	3	1272.75	-0.165571	19.2965	0		0	B1503	142.7	B1503	2.5
Medium	ESVERLTGV	2	1	1	O75955		0	9.79704e+06	0.01	0.07594	13.43	20.1142	2	989.526	-0.636639	44.1558	0	C1203	70.37	A6802	5.9	A6802	0.03
Medium	IHTKTTSGY	2	1	1	P05787		0	2.4199e+06	0.01	0.07127	13.28	18.6947	2	1007.51	-1.0693	19.4587	0	C1203	37.04	B1503	29.5	B1503	0.8
Medium	ETFWDKDQL	2	1	1	Q9UBG0		0	1.16669e+07	0.01	0.07117	11.03	25.3895	2	1181.55	0.128349	63.1393	0	C1203	70.37	A6802	65	A6802	0.6
Medium	AARPATSTL	17	1	1	Q04637		0	4.0465e+07	0.011	0.08161	34.66	0.180599	2	887.494	-0.134013	26.4019	0	C1203	88.89	C1203	72.5	C1203	0.4
Medium	DTKAILEQI	1	1	1	Q6ZRV2		0	1.24391e+07	0.011	0.0765	32.46	0.198754	2	1030.58	-0.140613	64.259	0	C1203	59.26	A6802	80.8	A6802	0.7
Medium	ESVSIFSSA	5	1	1	Q15800		0	6.60476e+07	0.011	0.08501	30.97	0.199279	2	926.447	-0.0772125	65.5953	0	C1203	33.33	A6802	7.5	A6802	0.05
Medium	SAVGHVFSL	2	1	1	Q69YN4		0	9.64513e+06	0.011	0.07734	30.09	0.511588	2	916.489	0.0270542	56.8716	0	C1203	81.48	C1203	23.6	C1203	0.09
Medium	DTFRGVAFV	21	1	1	O15067		0	1.87773e+08	0.011	0.07713	29.09	0.458037	2	1011.53	-0.478595	66.5193	0	C1203	74.07	A6802	3.7	A6802	0.01
Medium	GKYGEGAKQETF	4	1	1	P78383		0	1.0956e+07	0.011	0.08305	27.44	0.637998	3	1314.63	-0.139542	28.1145	0		0	B1503	283.9	B1503	3.5
Medium	STIGQAFEL	14	2	2	P29353;Q6S5L8		0	2.65882e+07	0.011	0.07785	26.11	1.13771	2	965.493	-0.567138	75.3805	0	C1203	74.07	A6802	37.5	A6802	0.4
Medium	EVSKAIINI	12	1	1	Q9NXP7		0	1.11663e+08	0.011	0.07906	25.99	0.69362	2	986.588	0.0618945	54.5991	0	C1203	40.74	A6802	19.1	A6802	0.17
Medium	HTANIQTLI	7	1	1	Q8NG31		0	4.60403e+08	0.011	0.0798	25.84	0.666784	2	1010.56	-0.520276	52.5488	0	C1203	62.96	A6802	6.3	A6802	0.03
Medium	YAKDDPLEF	1	1	1	P06756		0	2.56443e+07	0.011	0.08012	24.53	1.04901	2	1097.51	-0.843374	57.6026	0	C1203	85.19	B1503	28.5	C1203	0.2
Medium	EVYPGQQYL	7	1	1	Q8NF64		0	5.88375e+07	0.011	0.08282	24.05	1.69679	2	1096.53	-0.370371	68.1153	0	C1203	48.15	A6802	21.3	A6802	0.2
Medium	EINNIIKIV	2	2	2	P11388;Q02880		0	6.59211e+06	0.011	0.08271	22.46	0.755686	2	1055.65	-0.509602	66.9494	0	C1203	44.44	A6802	282.8	A6802	1.5
Medium	FGVDRAILY	2	1	1	P06756		0	9.15656e+06	0.011	0.07919	21.56	2.24621	2	1053.57	-0.347395	64.36	0	C1203	48.15	C1203	20.6	C1203	0.08
Medium	AALTFPVLF	9	1	1	Q05D32		0	1.39201e+07	0.011	0.07814	21.02	2.05339	2	978.565	-0.588703	103.745	0	C1203	77.78	B1503	26.2	B1503	0.7
Medium	AAFHEEFVV	3	1	1	P51114		0	160899128	0.011	0.07852	18.32	6.22273	2	1048.51	-0.52108	59.6531	0	C1203	85.19	C1203	471.8	C1203	1.6
Medium	RKFSENPHVY	5	1	1	O75319		0	1.63459e+07	0.011	0.08213	18.06	7.92281	3	1276.64	0.29735	28.0923	0	C1203	48.57	B1503	9.6	B1503	0.2
Medium	KQIDRQLTAY	2	1	1	Q14204		0	1.43474e+07	0.011	0.08422	17.72	5.54296	2	1235.67	-0.344408	35.3953	0	C1203	34.29	B1503	5	B1503	0.05
Medium	KQYKVVVY	11	1	1	P08754		0	2.42936e+07	0.011	0.07931	17.17	4.25849	2	1026.6	-0.780824	33.5203	0	C1203	30	B1503	6.9	B1503	0.12
Medium	MQYPGRSLVF	2	1	1	Q9GZR7		0	8.62946e+06	0.011	0.07881	16.67	6.7705	2	1197.61	-0.487259	64.2257	0	C1203	48.57	B1503	1.8	B1503	0.01
Medium	RLVEFLITY	1	1	1	Q52LW3		0	1.76715e+07	0.011	0.08484	16.52	4.19057	2	1153.66	-0.479308	79.9756	0	C1203	48.15	B1503	8.5	B1503	0.15
Medium	TSYPDPILL	4	1	1	P50591		0	3.99163e+07	0.011	0.08171	15.8	11.0932	2	1018.55	-0.351173	82.4095	0	C1203	85.19	C1203	34.2	C1203	0.15
Medium	STSNLNEKI	2	1	1	O60216		0	4.72096e+06	0.011	0.07827	14.48	15.1813	2	1005.52	-0.0463166	30.8384	0	C1203	62.96	A6802	233.1	A6802	1.4
Medium	EVFRVVDTL	2	2	2	Q07157;Q9UDY2		0	1.85478e+07	0.011	0.08444	13.37	16.3483	2	1077.59	-0.246634	65.1794	0	C1203	48.15	A6802	30.8	A6802	0.3
Medium	YKRDPSKQY	2	1	1	Q9UQ80		0	3.10185e+06	0.011	0.07908	13.33	16.3161	2	1184.61	-0.0935422	18.7576	0	C1203	48.15	B1503	41.6	B1503	1
Medium	RKITTYVSF	1	1	1	Q9UPT9		0	2.43507e+07	0.011	0.08101	12.74	18.7222	2	1114.62	-0.561419	47.5857	0	C1203	33.33	B1503	3.5	B1503	0.02
Medium	ESFSDYPPL	1	2	2	P68104;Q5VTE0		0	2.31766e+07	0.011	0.08504	12.18	15.0457	2	1054.47	0.0233473	74.2797	0	C1203	74.07	A6802	85.8	A6802	0.7
Medium	SAHSKVVIF	2	1	1	Q8IX04		0	1.16322e+07	0.011	0.07786	10.97	29.5379	2	987.562	-0.297756	35.8254	0	C1203	77.78	B1503	26.9	C1203	0.4
Medium	HACGVIATI	10	1	1	O95807		0	4.3834e+07	0.012	0.09326	38.24	0.0386844	2	884.466	-0.0264439	48.007	0	C1203	77.78	A6802	88	C1203	0.6
Medium	IQHPSNVL	15	1	1	P14866		0	3.029e+07	0.012	0.08958	32.7	0.189223	2	907.5	-0.00104391	35.5637	0	C1203	40	B1503	118.2	B1503	2.5
Medium	ATSDLVNAI	1	1	1	Q9Y490		0	5721176	0.012	0.09335	31.09	0.439202	2	903.479	0.299828	63.3795	0	C1203	74.07	A6802	68.4	C1203	0.5
Medium	KKFAQSTNL	1	1	1	P25490		0	4.61986e+06	0.012	0.08897	26.45	0.641574	2	1036.58	-0.423221	24.3475	0	C1203	40.74	B1503	15.9	B1503	0.4
Medium	ELADVLTEA	2	1	1	P40227		0	7.2137e+06	0.012	0.08652	26.36	0.695932	2	960.488	-0.402495	70.9226	0	C1203	11.11	A6802	25.8	A6802	0.25
Medium	STAGTDITVNSV	1	1	1	Q2TAY7		0	1.83501e+07	0.012	0.08714	25.94	1.02115	2	1164.58	0.896191	58.9746	0		0	A6802	189	A6802	1.2
Medium	ETFPANIQVV	3	1	1	Q5VYK3		0	5.83178e+07	0.012	0.08766	25.14	1.60202	2	1117.59	-0.0524201	76.4625	0	C1203	60	A6802	8.4	A6802	0.06
Medium	AKRKTVTAm	3	2	2	Q99525;P62805	M9(Oxidation)	0	1.50838e+06	0.012	0.09001	25.06	0.63407	2	1021.58	-0.371504	15.7329	0	C1203	37.04	B1503	16.4	B1503	0.4
Medium	ETIGVVHLV	8	1	1	Q63HN8		0	9.65874e+07	0.012	0.09124	24.02	0.76442	2	966.562	-0.278543	61.3388	0	C1203	74.07	A6802	2.1	A6802	0.01
Medium	ETAENILGV	12	1	1	Q8IWF2		0	5.34689e+07	0.012	0.08967	23.96	1.73795	2	945.489	-0.241474	69.7546	0	C1203	81.48	A6802	2.8	A6802	0.01
Medium	GKRLDVTGF	6	1	1	Q9UIY3		0	2.99967e+07	0.012	0.08938	22.91	1.56012	2	992.551	-0.979395	38.9759	0	C1203	33.33	B1503	77.6	B1503	1.6
Medium	RKFQAHKPA	5	1	1	Q9UNZ5		0	1.51734e+07	0.012	0.08814	22.3	1.12292	2	1082.62	-0.740815	17.0294	0	C1203	7.41	B1503	183.1	B1503	3
Medium	GKRPGGSTF	11	1	1	O15399		0	1.98419e+07	0.012	0.09112	19.75	4.06118	2	906.479	-0.142044	20.136	0	C1203	40.74	B1503	10.1	B1503	0.2
Medium	LRNQLQSVY	6	1	1	Q9BSM1		0	7.58675e+07	0.012	0.09219	19.64	3.58357	2	1120.61	-0.7195	41.0704	0	C1203	40.74	B1503	11.9	B1503	0.25
Medium	ETYPDAVKI	6	1	1	Q8WV22		0	6.3602e+07	0.012	0.09005	19.51	5.53338	2	1035.53	-1.69782	51.2625	0	C1203	74.07	A6802	20.9	A6802	0.2
Medium	RKKSDKNSSF	2	1	1	O95239		0	2.03248e+06	0.012	0.08825	19.47	3.8012	2	1196.64	-0.535216	15.8371	0	C1203	31.43	B1503	89.8	B1503	1.7
Medium	EIADLNVRI	2	1	1	Q6KB66		0	2.0741e+07	0.012	0.08818	19.12	3.75835	2	1042.59	-0.499386	64.523	0	C1203	40.74	A6802	10.1	A6802	0.08
Medium	AQRYLLQY	5	1	1	P25789		0	1.7215e+07	0.012	0.09245	19.02	3.85341	2	1054.57	-0.907576	52.5953	0	C1203	26.67	B1503	45.9	B1503	1.1
Medium	KEYERFSKY	5	2	2	O00148;Q13838		0	3.78838e+07	0.012	0.09244	18.81	6.09936	3	1249.62	-0.294948	27.6329	0	C1203	44.44	B1503	6	B1503	0.08
Medium	DIFRYQDEV	1	1	1	Q13283		0	8.37388e+06	0.012	0.08895	18.6	4.33027	2	1184.56	-0.0998115	64.1517	0	C1203	44.44	A6802	75.7	A6802	0.7
Medium	EVLDKRYNV	5	1	1	Q13523		0	4.12087e+07	0.012	0.0884	17.55	6.51838	2	1135.61	0.00176282	36.5433	0	C1203	40.74	A6802	24.1	A6802	0.25
Medium	EAVGKIFSNV	3	1	1	Q03135		0	1.07733e+07	0.012	0.08961	16.92	8.14569	2	1063.58	0.577033	55.8815	0	C1203	54.29	A6802	8	A6802	0.05
Medium	EVFEGREDSI	3	2	2	P43357;P43360		0	1.9077e+07	0.012	0.09005	16.89	8.10085	2	1180.55	-0.705173	47.4156	0	C1203	28.57	A6802	54.6	A6802	0.5
Medium	YVFPGVTRL	1	1	1	Q9H0A9		0	4.67274e+06	0.012	0.09081	16.5	5.2207	2	1051.59	0.137152	66.8349	0	C1203	55.56	C1203	5.9	C1203	0.01
Medium	ETYNGHLVSC	6	1	1	Q9Y4Z0		0	6.42316e+08	0.012	0.09118	16.43	4.49104	2	1122.49	-0.552997	43.1915	0	C1203	28.57	A6802	92.5	A6802	0.8
Medium	RHREHLINY	1	1	1	Q5BJD5		0	3.58931e+07	0.012	0.09164	16.22	10.3679	3	1237.65	-0.00885243	25.2865	0	C1203	44.44	B1503	11.7	B1503	0.25
Medium	KKYPKENEY	2	1	1	P14735		0	1.9017e+06	0.012	0.08573	15.47	11.6525	2	1198.61	-0.622914	19.0951	0	C1203	51.85	B1503	12	B1503	0.3
Medium	ETHFGFETV	1	1	1	Q5HYK3		0	7.61581e+07	0.012	0.08937	15.18	9.37776	2	1066.48	-0.558156	58.3035	0	C1203	70.37	A6802	4.6	A6802	0.01
Medium	KTFPYQHRY	1	1	1	Q8NI27		0	5.52605e+06	0.012	0.09201	15.01	15.4185	3	1239.63	0.14363	27.9341	0	C1203	77.78	B1503	49.1	C1203	0.3
Medium	QKKDTGHVY	2	1	1	Q15208		0	7.72982e+06	0.012	0.09027	12.79	22.674	2	1075.55	-0.419688	16.6098	0	C1203	44.44	B1503	66	B1503	1.4
Medium	mALSAVVSL	4	1	1	Q8NBI5	M1(Oxidation)	0	1.81667e+07	0.013	0.09947	39.94	0.0457021	2	906.493	-3.73491	69.3124	0	C1203	85.19	C1203	20	C1203	0.08
Medium	VAADILNRL	1	1	1	O60673		0	6771422	0.013	0.09726	33.58	0.0959944	2	984.583	-0.604168	63.4155	0	C1203	85.19	C1203	53.1	C1203	0.25
Medium	ITAKVATHL	4	1	1	Q92752		0	3.45139e+07	0.013	0.09485	31.89	0.0747126	2	953.578	-0.206572	44.2706	0	C1203	70.37	A6802	150.2	C1203	0.8
Medium	KKIKTETY	2	1	1	Q8N5C6		0	1.2513e+06	0.013	0.09575	30.79	0.146353	2	1010.59	-0.282159	17.8701	0	C1203	26.67	B1503	473.8	B1503	5
Medium	KKYKEKRTL	1	1	1	Q5M775		0	1.77538e+06	0.013	0.101	27.69	0.073363	2	1193.74	-0.215832	16.3944	0	C1203	48.15	B1503	271.2	B1503	3.5
Medium	KKKPKAEGY	1	1	1	Q8IY81		0	596282	0.013	0.09614	23.59	0.820354	2	1048.61	-0.314394	15.8963	0	C1203	44.44	B1503	339.7	B1503	4
Medium	ETIRNYAQV	3	1	1	Q9Y6E2		0	8.66362e+07	0.013	0.09515	23.55	1.929	2	1093.56	-1.25996	43.5223	0	C1203	66.67	A6802	5	A6802	0.02
Medium	ETTKNVQQTV	2	1	1	O75586		0	2.5293e+07	0.013	0.09601	21.05	3.41067	2	1147.59	-0.529053	27.3036	0	C1203	42.86	A6802	82	A6802	0.7
Medium	NTIPLLYGI	1	1	1	Q96NB1		0	4.03247e+07	0.013	0.09619	20.55	2.67663	2	1003.58	0.39648	56.8331	0	C1203	66.67	A6802	2.6	A6802	0.01
Medium	STAPPAHGV	2	1	1	P15941		0	1.09487e+08	0.013	0.09992	20.01	4.14145	2	836.426	-0.3616	22.8685	0	C1203	77.78	A6802	3.7	A6802	0.01
Medium	ESSDVIRLI	2	1	1	Q2TAY7		0	1.04835e+07	0.013	0.09416	18.92	4.92992	2	1031.57	-0.15089	63.999	0	C1203	74.07	A6802	42.7	A6802	0.4
Medium	GKKAKSETF	4	1	1	Q01780		0	1.24807e+06	0.013	0.09656	18.9	3.47505	2	995.552	-0.328385	16.5678	0	C1203	33.33	B1503	140.8	B1503	2.5
Medium	KKKKDPETY	1	1	1	Q3B726		0	621309	0.013	0.09726	18.8	3.47229	2	1136.63	-0.762559	15.9971	0	C1203	44.44	B1503	182.3	B1503	3
Medium	KKFDEGRNNF	5	1	1	P07237		0	1.84668e+07	0.013	0.09701	18.14	5.21386	3	1254.62	-0.436269	24.2014	0	C1203	42.86	B1503	31.5	B1503	0.8
Medium	RKIGRDQELY	3	1	1	P26639		0	1.63274e+08	0.013	0.09911	18.02	4.78884	3	1277.7	-0.0729915	26.6053	0	C1203	31.43	B1503	89.7	B1503	1.7
Medium	PQRATSNVF	9	3	3	P19105;O14950;P24844		0	2.53932e+07	0.013	0.09618	17.63	7.70932	2	1019.53	-0.606737	32.3291	0	C1203	33.33	B1503	22.2	B1503	0.6
Medium	VAINHIVDF	5	1	1	P78346		0	3.70837e+07	0.013	0.09502	16.76	6.82247	2	1027.56	-1.16344	65.5812	0	C1203	77.78	B1503	12.9	B1503	0.3
Medium	KKKEPEPNF	1	1	1	Q99460		0	923826	0.013	0.09521	14.75	15.3431	2	1116.6	-0.0513818	21.4315	0	C1203	33.33	B1503	97.9	B1503	1.8
Medium	EIAQVVEKV	6	1	1	Q9BYK8		0	5.19769e+08	0.013	0.1007	14.58	10.309	2	1014.58	-0.407197	47.9096	0	C1203	44.44	A6802	12.1	A6802	0.1
Medium	YVFSKTYNV	1	1	1	Q14432		0	5.26415e+06	0.013	0.09852	14.13	18.507	2	1120.57	-0.365146	53.7168	0	C1203	48.15	A6802	3.8	A6802	0.01
Medium	RLLLPVAEY	1	1	1	O00541		0	2.45728e+06	0.013	0.09491	13.27	11.3411	2	1073.64	-0.206649	67.6651	0	C1203	44.44	B1503	12.5	B1503	0.3
Medium	HTMDPQLRL	5	1	1	P49327		0	5.42282e+07	0.013	0.0972	12.41	16.2618	2	1110.57	-0.160346	44.9703	0	C1203	74.07	A6802	87.4	C1203	0.5
Medium	KQRPGQQVA	2	1	1	O75534		0	1.83831e+06	0.013	0.09374	12.26	11.8769	2	1011.57	0.17436	16.8681	0	C1203	11.11	B1503	89.4	B1503	1.7
Medium	TAMDQVFHV	5	1	1	Q93052		0	2.16195e+07	0.013	0.09953	10.1	36.9151	2	1047.49	0.703176	62.7076	0	C1203	81.48	A6802	8.6	A6802	0.06
Medium	VMAPRTVLL	1	10	10	P01889;P30460;P30462;Q95365;P30475;P30480;P30486;Q29836;Q31612;Q31610		0	1450780744	0.014	0.1028	31.74	0.143255	2	999.599	-2.66057	58.4011	0	C1203	55.56	B1503	30.5	C1203	0.4
Medium	SAGPGHSEL	3	1	1	Q7Z7M0		0	5.9151e+06	0.014	0.1014	30.3	0.211195	2	854.4	-0.351501	23.9319	0	C1203	85.19	C1203	606.1	C1203	1.9
Medium	RKSGVGNVF	5	2	2	Q13310;Q5JQF8		0	1.43195e+07	0.014	0.1091	27.58	0.45339	2	963.537	-0.375255	27.8235	0	C1203	40.74	B1503	6.8	B1503	0.12
Medium	HAVEWPVVM	1	1	1	Q13535		0	5.35554e+07	0.014	0.1032	26.2	0.837193	2	1067.53	0.0262816	68.1639	0	C1203	81.48	C1203	13.7	C1203	0.04
Medium	SAFATPFLV	5	1	1	P15954		0	1.55309e+08	0.014	0.1095	24.07	1.53171	2	952.514	-0.308548	89.5914	0	C1203	81.48	A6802	16.1	C1203	0.08
Medium	HKGRGQLVY	8	1	1	Q9BX59		0	4.59852e+07	0.014	0.1044	21.37	2.61802	2	1057.59	-0.610976	21.4795	0	C1203	44.44	B1503	26.9	B1503	0.7
Medium	AKIVAIKEF	3	1	1	Q9BXT8		0	1.00994e+08	0.014	0.1105	19.7	0.877574	2	1018.63	-1.17488	40.873	0	C1203	44.44	B1503	16.6	B1503	0.4
Medium	SAFGASHHV	2	1	1	P10301		0	2.52979e+06	0.014	0.105	19.27	3.44797	2	912.432	-0.170785	22.758	0	C1203	81.48	A6802	10.5	A6802	0.08
Medium	EVVNIVKHL	1	1	1	A3KMH1		0	1.71531e+07	0.014	0.1059	18.24	1.59641	2	1050.63	-0.221398	47.1585	0	C1203	44.44	A6802	79.1	A6802	0.7
Medium	SKFGTGNKY	7	1	1	P14735		0	1.01686e+07	0.014	0.1029	17.33	7.74936	2	1001.5	-0.231575	22.3026	0	C1203	44.44	B1503	15.2	B1503	0.4
Medium	ETAKLIEKL	9	1	1	P13639		0	1897343930	0.014	0.1106	17.02	2.52731	2	1044.63	-1.22684	40.7706	0	C1203	74.07	A6802	26.7	A6802	0.25
Medium	TTYEGIFKT	3	1	1	Q8WWM7		0	1.50279e+07	0.014	0.1068	15.74	10.9768	2	1059.54	-0.382603	53.3432	0	C1203	40.74	A6802	31	A6802	0.3
Medium	YKKTKEAVL	3	1	1	P36578		0	3.10483e+06	0.014	0.1063	15.42	3.1837	2	1079.65	-0.489012	21.0355	0	C1203	44.44	B1503	499.4	B1503	5
Medium	RKISNNITL	2	3	3	Q96LV5;Q2T9F4;Q96HW7		0	8.38743e+06	0.014	0.105	14.9	6.82783	2	1058.63	-0.64447	33.7096	0	C1203	48.15	B1503	19.3	B1503	0.5
Medium	YKEKTGQEY	2	1	1	P07814		0	1.64706e+06	0.014	0.1046	12.44	20.0242	2	1145.55	-0.374233	20.4638	0	C1203	44.44	B1503	140	B1503	2.5
Medium	RKYGKSLYY	1	2	2	P07355;A6NMY6		0	3.90015e+06	0.014	0.1057	11.78	23.0983	2	1177.64	-0.648404	26.9243	0	C1203	48.15	B1503	4	B1503	0.03
Medium	SKPRNVPAAY	1	1	1	P20645		0	4.50103e+06	0.015	0.1183	36.15	0.0933396	2	1102.6	-0.905557	24.9513	0	C1203	34.29	B1503	97.5	B1503	1.8
Medium	EAASAIVNL	1	1	1	Q9Y678		0	8045069	0.015	0.1174	34.71	0.175828	2	887.483	-0.478409	65.1152	0	C1203	88.89	A6802	25.8	A6802	0.25
Medium	ESAGLGYRV	2	1	1	Q63HN8		0	3.747e+07	0.015	0.1139	31.09	0.306663	2	951.489	-0.612866	41.4361	0	C1203	74.07	A6802	6.5	A6802	0.04
Medium	RQPDSPTALY	7	1	1	Q9BQG0		0	5.63669e+07	0.015	0.1176	30.33	0.430466	2	1147.57	-0.94424	43.6385	0	C1203	34.29	B1503	14	B1503	0.4
Medium	KKRLDGRQTY	1	1	1	Q06265		0	2.76827e+06	0.015	0.1139	29.61	0.241327	3	1264.71	-0.499218	17.9458	0	C1203	31.43	B1503	79.9	B1503	1.6
Medium	KAFGWPSSL	2	1	1	Q9HAH1		0	3.56158e+07	0.015	0.1164	29.14	0.511	2	992.52	0.0875198	64.9557	0	C1203	85.19	C1203	8.6	C1203	0.01
Medium	LTTCISAHV	2	1	1	Q86Y39		0	8.15158e+07	0.015	0.1166	28.9	0.605671	2	944.486	-0.543688	46.6418	0	C1203	66.67	A6802	5.7	A6802	0.03
Medium	GKGSFGEVF	9	2	2	Q9P289;Q9Y6E0		0	2.97977e+07	0.015	0.1135	28.19	0.58141	2	927.457	-0.0349895	50.3028	0	C1203	37.04	B1503	52	B1503	1.2
Medium	HKSPDGRTY	3	1	1	O75400		0	2.78081e+06	0.015	0.1148	27.19	0.763559	2	1060.52	-0.733935	17.2573	0	C1203	55.56	B1503	23.2	B1503	0.6
Medium	DVARISWYL	1	1	1	Q13011		0	1.52762e+07	0.015	0.1117	26.54	0.832045	2	1122.59	0.0218957	81.2294	0	C1203	40.74	A6802	8	A6802	0.05
Medium	SQRAGLQF	6	2	2	Q71UI9;P0C0S5		0	1.85273e+07	0.015	0.1173	23.18	1.84354	2	906.479	-0.535005	39.0182	0	C1203	26.67	B1503	25.5	B1503	0.7
Medium	TIPDFIFANV	5	1	1	P61073		0	2.25421e+07	0.015	0.116	21.61	2.87519	2	1136.6	-0.546579	99.7678	0	C1203	28.57	A6802	11.3	A6802	0.09
Medium	ETSSIMQKL	14	1	1	Q5VT06		0	2.2909e+08	0.015	0.1135	21.06	3.20619	2	1036.53	-0.610009	47.5279	0	C1203	74.07	A6802	22.9	A6802	0.25
Medium	EVAMMPHLV	9	1	1	Q53EP0		0	1.57158e+07	0.015	0.1117	20.67	2.61782	2	1026.51	-0.23326	63.8941	0	C1203	44.44	A6802	6.5	A6802	0.04
Medium	ETSPHVIQA	12	1	1	O75533		0	1.0789e+09	0.015	0.1144	18.39	4.65056	2	981.498	-1.7144	32.9758	0	C1203	48.15	A6802	13.8	A6802	0.12
Medium	QQALHTVQY	2	1	1	Q5SRE5		0	1.69369e+07	0.015	0.1172	17.67	6.89906	2	1087.55	-0.405862	38.4871	0	C1203	44.44	B1503	4.4	B1503	0.04
Medium	TTARVFSHI	1	1	1	Q9BS91		0	1.36708e+07	0.015	0.1171	17.44	7.31574	2	1031.56	-0.602611	34.6821	0	C1203	62.96	A6802	4.2	A6802	0.01
Medium	VQENGQRKY	2	2	2	Q9NQ94;A0AV96		0	1.20915e+06	0.015	0.1149	12.44	23.9754	2	1121.57	0.144964	17.7778	0	C1203	44.44	B1503	51.6	B1503	1.2
Medium	TTASIATTL	1	1	1	O60331		0	2.76147e+07	0.016	0.1223	24.67	0.745507	2	878.483	-0.0848965	56.0778	0	C1203	77.78	A6802	14	A6802	0.12
Medium	EAARHEHQV	5	1	1	Q15233		0	3.95276e+06	0.016	0.1221	22.84	2.06594	2	1076.52	-0.208526	15.9303	0	C1203	77.78	A6802	86.5	A6802	0.7
Medium	KGRTPGSSY	1	1	1	Q96BH1		0	2.04818e+06	0.016	0.1227	20.25	3.61528	2	952.484	-0.420764	18.2168	0	C1203	37.04	B1503	69.8	B1503	1.5
Medium	RMWKTLTFF	1	1	1	P12074		0	1.1339e+07	0.016	0.1214	20.17	3.5094	2	1229.65	-0.554393	68.4319	0	C1203	29.63	B1503	3.7	B1503	0.03
Medium	FQKSGASVV	3	1	1	Q5SSJ5		0	1.10641e+07	0.016	0.123	18.82	4.83152	2	922.499	-0.51426	29.4041	0	C1203	48.15	B1503	26.5	C1203	0.5
Medium	ASSPVMEQV	1	1	1	Q9NZQ3		0	6.82476e+07	0.016	0.1203	17.79	6.73516	2	947.45	-0.265443	64.3797	0	C1203	81.48	A6802	206.3	A6802	1.3
Medium	HQIKSLQY	3	1	1	Q9NW82		0	4.00755e+07	0.016	0.1228	13.95	17.0188	2	1016.55	-0.436592	29.6671	0	C1203	26.67	B1503	25.5	B1503	0.7
Medium	QLTmLGAMQV	1	1	1	Q9BYC2	M4(Oxidation)	0	5.43838e+07	0.016	0.1201	10.79	35.3814	2	1107.55	-1.31155	44.0716	0	C1203	22.86	A6802	109	A6802	0.8
Medium	KKFNEPGSQY	1	1	1	P51531		0	4.38658e+06	0.017	0.1259	33.93	0.145384	2	1197.59	-0.314099	27.535	0	C1203	40	B1503	26.1	B1503	0.7
Medium	ITAPPSRVL	4	1	1	O00767		0	3.45139e+07	0.017	0.1294	31.58	0.0802406	2	953.577	-0.665105	43.9864	0	C1203	85.19	C1203	72.7	C1203	0.4
Medium	QQFPAFNSY	4	1	1	Q8N5U6		0	1.23832e+07	0.017	0.126	27.31	0.405187	2	1101.5	-1.85102	70.6737	0	C1203	48.15	B1503	2.3	B1503	0.01
Medium	TTFGSRVNV	4	1	1	Q9P265		0	6.86384e+07	0.017	0.1301	24.56	1.06873	2	980.515	-1.3414	40.5073	0	C1203	77.78	A6802	5.6	A6802	0.03
Medium	TVAEVQETL	3	1	1	Q8TEQ6		0	9.79267e+06	0.017	0.1264	21.49	2.91814	2	989.515	-0.318604	53.8492	0	C1203	48.15	A6802	23.9	A6802	0.25
Medium	SVVDHFNRI	1	1	1	P51665		0	1.32257e+07	0.017	0.1283	20.16	3.77917	2	1086.57	-0.198832	44.1388	0	C1203	33.33	A6802	29.9	A6802	0.3
Medium	DTAHVLFTL	3	1	1	Q6YHU6		0	1.89543e+07	0.017	0.1296	18.53	7.92449	2	1016.54	-0.276606	77.7779	0	C1203	74.07	A6802	6	A6802	0.03
Medium	QTSAVVKNL	4	1	1	Q4VC31		0	12959544	0.017	0.1298	18.26	5.38003	2	959.552	-0.330283	34.0705	0	C1203	77.78	A6802	151.2	A6802	1
Medium	KKRAEQEAL	2	1	1	P18848		0	6.82e+06	0.017	0.1259	18.1	5.2319	2	1072.61	0.130787	17.5585	0	C1203	37.04	B1503	329.7	B1503	4
Medium	RKDDPRLSF	5	1	1	P78527		0	8.852e+07	0.017	0.126	16.38	8.67874	2	1133.61	-0.208776	32.0454	0	C1203	37.04	B1503	76.8	B1503	1.6
Medium	RHRDPQLFY	4	1	1	Q9P253		0	3.89885e+07	0.017	0.1294	14.34	19.5366	3	1231.63	-0.00853098	33.9991	0	C1203	44.44	B1503	20.1	B1503	0.5
Medium	RKDLFIATY	1	1	1	P32121		0	7.71286e+06	0.017	0.1255	12.48	16.1402	2	1126.63	-0.455965	49.564	0	C1203	44.44	B1503	25.2	B1503	0.7
Medium	RKIPTGAEA	4	1	1	Q9Y6M7		0	6.13398e+06	0.018	0.137	34.4	0.104276	2	942.536	-0.292522	22.0011	0	C1203	11.11	B1503	409.8	B1503	4.5
Medium	SKFAGGLHF	2	1	1	Q09666		0	1.54427e+07	0.018	0.1354	27.56	0.685241	2	963.504	-0.669827	46.4595	0	C1203	37.04	B1503	2.6	B1503	0.01
Medium	HTINGHNCEV	2	1	1	P51991		0	2.79112e+07	0.018	0.1355	27.5	0.397445	2	1123.49	-0.461894	27.7405	0	C1203	45.71	A6802	31.5	A6802	0.3
Medium	ETAGFQEGV	2	1	1	Q5TCZ1		0	1.64167e+07	0.018	0.1341	27.11	0.796139	2	937.426	-0.397313	47.9239	0	C1203	74.07	A6802	2.3	A6802	0.01
Medium	SQYPGAKY	1	1	1	P24928		0	3.73299e+06	0.018	0.1329	25.23	1.13443	2	913.442	0.169271	30.7011	0	C1203	30	B1503	11.7	B1503	0.25
Medium	SIHVGQAGV	4	5	5	Q71U36;P68363;Q9BQE3;Q13748;Q6PEY2		0	2.18873e+07	0.018	0.1318	23.36	1.66097	2	867.468	-0.377142	35.3196	0	C1203	37.04	A6802	335	A6802	1.7
Medium	KKIKDSTAA	1	1	1	Q13492		0	524056	0.018	0.1326	21.33	1.35315	2	961.567	-0.492939	15.8038	0	C1203	0	B1503	453	B1503	4.5
Medium	HVVDFFNRI	1	2	2	Q86TA1;Q70IA8		0	8.26663e+06	0.018	0.1306	14.98	11.6385	2	1146.61	3.10052	60.9439	0	C1203	33.33	A6802	8.1	A6802	0.05
Medium	HAANIVTAI	6	1	1	P04035		0	5.99102e+07	0.019	0.1384	28.45	0.393017	2	909.515	-0.307953	46.1693	0	C1203	74.07	C1203	9.7	C1203	0.02
Medium	AKFKSSIY	6	1	1	Q9Y6V7		0	9.91055e+06	0.019	0.1378	22.26	2.80328	2	943.524	-0.716304	29.5587	0	C1203	40	B1503	72.7	B1503	1.5
Medium	ETFVGDYTL	3	1	1	P19174		0	1.68746e+07	0.019	0.1389	20.94	2.08311	2	1044.49	-0.000364712	76.921	0	C1203	74.07	A6802	16.4	A6802	0.15
Medium	VRAFLAAAL	1	1	1	Q8TAC2		0	9.11292e+07	0.019	0.1373	20.54	0.895001	2	931.572	-0.443607	66.7713	0	C1203	44.44	B1503	59.1	C1203	1.1
Medium	EAVDLITRL	3	1	1	Q9P0M9		0	1.14104e+07	0.019	0.1382	16.03	8.22593	2	1029.59	-0.376694	67.2994	0	C1203	81.48	A6802	91.5	A6802	0.7
Medium	GKVFRHNSY	2	3	3	Q9HCG1;Q96SE7;Q9H7R5		0	1.36902e+06	0.019	0.1422	13.64	20.0319	2	1107.57	-0.483983	20.5202	0	C1203	37.04	B1503	32.4	B1503	0.8
Medium	GAFGKPSSL	5	1	1	Q8IVT2		0	1.46317e+07	0.02	0.1484	30.94	0.258567	2	863.461	-1.32625	37.9352	0	C1203	85.19	C1203	61.9	C1203	0.3
Medium	ISFPAPLYI	1	1	1	P86397		0	1.10811e+07	0.02	0.1505	30.43	0.266829	2	1020.58	0.162085	96.8521	0	C1203	77.78	C1203	8.2	C1203	0.01
Medium	ETFGMKLSV	1	2	2	Q9GZQ8;A6NCE7		0	2.67632e+07	0.02	0.1497	27.97	0.622153	2	1011.52	-0.190279	63.3633	0	C1203	77.78	A6802	4.9	A6802	0.02
Medium	HSSGINVNA	8	1	1	Q14444		0	4.89711e+08	0.02	0.1456	27.63	0.492209	2	898.437	-1.24575	26.3407	0	C1203	40.74	A6802	54.6	A6802	0.5
Medium	ETAGMVRHI	2	1	1	Q8IZV5		0	6.01265e+06	0.02	0.1489	27.13	0.512958	2	1013.52	-0.27086	28.5574	0	C1203	74.07	A6802	13.2	A6802	0.12
Medium	EVIKVFNDMKV	3	1	1	Q9Y281		0	8.32588e+06	0.02	0.1496	26.96	0.62506	3	1321.72	-0.55551	60.089	0		0	A6802	240.9	A6802	1.4
Medium	KKLEKETTM	1	1	1	P40222		0	947539	0.02	0.1488	26.6	0.731587	2	1107.61	-0.702449	17.7419	0	C1203	37.04	B1503	67.7	B1503	1.4
Medium	SVNLRSITY	6	1	1	Q86TM3		0	2.66879e+08	0.02	0.1487	17.8	4.77463	2	1052.57	0.0214967	30.121	0	C1203	44.44	B1503	106.6	C1203	1.3
Medium	YVTPVNRNV	1	1	1	P62993		0	7.00258e+06	0.02	0.1454	15.47	11.0792	2	1061.57	-0.413955	36.7726	0	C1203	51.85	A6802	48.3	A6802	0.5
Medium	AQYPELPPDFI	1	1	1	Q9NXR7		0	1.98908e+07	0.02	0.1504	13.13	20.4194	2	1289.64	-0.471993	73.3673	0		0	B1503	108.3	B1503	2
Medium	GKQKDGTSF	1	1	1	Q07866		0	1.23153e+06	0.02	0.1488	12.16	21.1905	2	967.484	-0.272746	17.7256	0	C1203	29.63	B1503	32.7	B1503	0.8
Medium	ETNSILQEL	1	1	1	O60346		0	2.65326e+07	0.021	0.1587	29.39	0.498469	2	1046.54	0.0719728	76.6521	0	C1203	74.07	A6802	20.7	A6802	0.2
Medium	STIAILNSV	2	1	1	P42695		0	2.5731e+07	0.021	0.1535	27.49	0.49256	2	917.53	-0.2675	74.4407	0	C1203	66.67	A6802	2.9	A6802	0.01
Medium	ETMQSLNDRL	1	2	2	P05783;Q92764		0	8.91745e+06	0.021	0.1574	25.86	0.991884	2	1206.58	-0.063511	48.3795	0	C1203	45.71	A6802	98.5	A6802	0.8
Medium	GKISKQEAY	1	1	1	P20936		0	1.75198e+06	0.021	0.1532	17.97	5.0358	2	1023.55	-0.524629	21.6504	0	C1203	40.74	B1503	50.1	B1503	1.2
Medium	RKKDWKTLY	2	1	1	Q9NWZ5		0	1.65703e+07	0.021	0.1539	17.94	2.58477	3	1237.71	0.092591	27.7786	0	C1203	40.74	B1503	45.2	B1503	1.1
Medium	EVADEKMLSGL	1	1	1	Q15003		0	1.33773e+07	0.021	0.1571	17.4	7.95391	2	1191.59	-0.258935	61.0789	0		0	A6802	260.6	A6802	1.5
Medium	RSLQENIAY	2	1	1	Q03518		0	1.40582e+07	0.021	0.1594	17.3	7.63549	2	1093.56	-0.25532	43.8572	0	C1203	70.37	B1503	13.9	B1503	0.4
Medium	ASVDKVLEL	1	1	1	O14979		0	7.42121e+06	0.021	0.1539	15.98	8.26314	2	973.557	0.264965	58.255	0	C1203	85.19	C1203	98.8	C1203	0.5
Medium	EAVAVIENI	1	1	1	Q9Y2L8		0	10370627	0.021	0.1537	13.98	14.564	2	957.525	-0.060836	69.9054	0	C1203	70.37	A6802	15.1	A6802	0.15
Medium	MAGPLRAPL	1	1	1	P01034		0	1.11329e+07	0.022	0.1642	39.11	0.013913	2	925.528	-0.522284	53.5461	0	C1203	81.48	C1203	92.8	C1203	0.5
Medium	AQAPAQSQF	1	1	1	Q92793		0	1.12954e+07	0.022	0.1637	26.46	0.815882	2	947.457	-1.01364	38.7774	0	C1203	44.44	B1503	3.7	B1503	0.03
Medium	VAFSQVLTI	1	1	1	Q13487		0	1.23301e+07	0.022	0.1638	23.79	1.003	2	977.567	-0.0771108	85.653	0	C1203	88.89	C1203	13.1	C1203	0.04
Medium	ETANKIFMV	4	1	1	Q14680		0	100292954	0.022	0.1613	19.46	4.42146	2	1052.54	-0.99442	57.3361	0	C1203	74.07	A6802	2.9	A6802	0.01
Medium	ELSKIIQKV	4	1	1	Q5T4S7		0	2.12933e+07	0.022	0.1639	16.52	2.2964	2	1057.66	-0.647683	42.0153	0	C1203	44.44	A6802	187	A6802	1.2
Medium	HIAEVSQEV	1	1	1	P61764		0	1.51829e+07	0.022	0.165	15.74	9.05532	2	1011.51	-0.407179	36.2498	0	C1203	48.15	A6802	9.9	A6802	0.07
Medium	KTKEGVMYV	1	1	1	O76070		0	1.25674e+07	0.022	0.1641	13.98	12.6922	2	1054.56	0.150805	29.7728	0	C1203	74.07	C1203	138.5	C1203	0.6
Medium	QQIRSQKGY	1	1	1	O15050		0	1.77741e+08	0.023	0.1676	31.71	0.217029	2	1107.59	2.37086	26.5904	0	C1203	40.74	B1503	19.9	B1503	0.5
Medium	AKLPTGTTL	2	1	1	P54098		0	1.21114e+07	0.023	0.1707	30.54	0.26329	2	901.535	-0.231257	43.1079	0	C1203	51.85	B1503	32.9	B1503	0.8
Medium	MVPRLTAVL	1	1	1	Q63HM2		0	1.71879e+09	0.023	0.1684	30.44	0.0578336	2	999.6	-2.29421	58.5757	0	C1203	40.74	C1203	46.8	C1203	0.25
Medium	EVSNTFVRL	4	1	1	Q9BUI4		0	7.37635e+07	0.023	0.1666	22.12	2.27368	2	1064.57	-0.685529	57.0939	0	C1203	44.44	A6802	29.1	A6802	0.3
Medium	EVISKTPTL	6	1	1	Q8IUR6		0	2.81863e+07	0.023	0.1695	20.47	2.46883	2	987.572	-0.186606	45.3105	0	C1203	44.44	A6802	84.5	A6802	0.7
Medium	EVAETSMHNL	2	1	1	Q99961		0	1.03346e+07	0.023	0.1706	20.32	2.38373	2	1130.51	-1.08443	41.2915	0	C1203	28.57	A6802	22.3	A6802	0.25
Medium	VKEGVSAAF	1	1	1	Q7L1Q6		0	9.4989e+06	0.023	0.1688	17.71	7.36529	2	907.487	-1.30149	38.8017	0	C1203	37.04	B1503	24.8	B1503	0.6
Medium	EATDVKSTL	1	1	1	Q9NZM1		0	1.93366e+07	0.023	0.169	17.38	6.98608	2	963.5	0.205519	33.6481	0	C1203	81.48	A6802	257.7	A6802	1.5
Medium	MTMNVIQTV	3	1	1	Q9UJX3		0	1.29574e+07	0.023	0.1669	17.13	7.85897	2	1036.52	0.144649	69.8064	0	C1203	74.07	A6802	3.3	A6802	0.01
Medium	KSYPFVLSA	1	1	1	O75976		0	7.05855e+06	0.023	0.1691	16.22	7.58249	2	1011.55	-0.462287	59.2251	0	C1203	48.15	C1203	70.8	C1203	0.4
Medium	YAHFPINVV	3	1	1	P32969		0	5.59536e+07	0.023	0.1692	16.17	8.70291	2	1059.56	-0.383293	65.6055	0	C1203	85.19	C1203	7.5	C1203	0.01
Medium	VKRGDESQF	1	1	1	P57076		0	3.30372e+06	0.023	0.1703	12.59	21.3218	2	1065.53	-0.463008	22.0477	0	C1203	37.04	B1503	77.9	B1503	1.6
Medium	KKPSTGSRY	2	1	1	Q15021		0	5.03595e+06	0.024	0.1786	34.89	0.105264	2	1023.56	-0.404905	16.067	0	C1203	40.74	B1503	102.5	B1503	1.9
Medium	ETSSVVRKI	4	1	1	Q5SRE5		0	1.36299e+08	0.024	0.1739	30.16	0.197296	2	1018.59	-0.561257	26.3202	0	C1203	74.07	A6802	47.4	A6802	0.5
Medium	DTFDHPTLI	3	1	1	Q14865		0	1.04229e+07	0.024	0.1718	23.2	1.71852	2	1058.51	-0.609594	65.1538	0	C1203	70.37	A6802	25.3	A6802	0.25
Medium	ETLEITQNL	1	1	1	Q4ZG55		0	2.92831e+07	0.024	0.1778	17.83	6.68412	2	1060.55	-0.873357	64.8263	0	C1203	70.37	A6802	18.3	A6802	0.17
Medium	QKIDVQESF	1	1	1	O95602		0	2.78022e+07	0.024	0.1769	14.59	16.157	2	1093.55	-0.264896	47.629	0	C1203	33.33	B1503	82.6	B1503	1.6
Medium	LQKPGETVF	3	1	1	Q6NYC1		0	1.67966e+07	0.024	0.1728	14.14	19.4031	2	1018.56	-0.550114	44.9654	0	C1203	40.74	B1503	3.4	B1503	0.02
Medium	KKYGQPIQM	3	1	1	O95757		0	1.85355e+07	0.024	0.1727	13.91	10.6529	2	1092.59	0.0113781	31.0462	0	C1203	44.44	B1503	18.7	B1503	0.5
Medium	QVGPVNENV	1	1	1	Q14966		0	3.10159e+07	0.024	0.1762	13.49	15.5737	2	955.484	-0.659444	46.0075	0	C1203	44.44	A6802	110.3	A6802	0.8
Medium	RKRGFEVVY	1	1	1	P08238		0	3.18404e+07	0.024	0.1757	12.95	10.0333	2	1153.65	-0.484528	33.4374	0	C1203	48.15	B1503	7.4	B1503	0.12
Medium	EVAAGGWHSV	2	1	1	A6NED2		0	2.53456e+07	0.024	0.1781	11.77	20.5303	2	1012.48	-0.475866	43.6262	0	C1203	31.43	A6802	17.2	A6802	0.15
Medium	ETFSDNNRL	1	1	1	Q8WTR7		0	7.59283e+06	0.025	0.183	24.04	1.10783	2	1095.51	-0.829267	37.8895	0	C1203	74.07	A6802	35.9	A6802	0.4
Medium	THLKPGTLY	2	1	1	Q53EP0		0	105343782	0.025	0.1852	21.36	3.15304	2	1029.57	-0.0989394	34.4922	0	C1203	37.04	B1503	35.2	B1503	0.9
Medium	IKAGRVGAEGY	2	1	1	Q5T1H1		0	6.9373e+07	0.025	0.1819	19.61	3.76048	2	1120.61	-0.964136	41.0774	0		0	B1503	465	B1503	5
Medium	KKDPNKPLTY	1	1	1	P14902		0	6.36744e+06	0.025	0.1838	19.38	3.66452	3	1203.67	0.0088278	22.8398	0	C1203	40	B1503	355	B1503	4
Medium	KKLEKETTMY	1	1	1	P40222		0	9.56623e+06	0.025	0.1827	18.69	4.89383	3	1270.67	-0.595742	23.2127	0	C1203	28.57	B1503	104.1	B1503	1.9
Medium	NSYPHQLYT	2	1	1	Q8IZD2		0	1.65498e+07	0.025	0.1802	12.11	18.443	2	1122.52	-0.254371	41.3574	0	C1203	44.44	C1203	340.4	C1203	1.3
Medium	TVTTVILEV	1	1	1	Q9UKF6		0	1.06569e+08	0.026	0.1892	24.28	0.665878	2	974.577	0.135065	78.3981	0	C1203	48.15	A6802	23.3	A6802	0.25
Medium	HATRIIDEV	1	1	1	O95816		0	9.03087e+06	0.026	0.1915	21.87	2.06936	2	1053.57	2.30956	36.3889	0	C1203	81.48	A6802	48.6	A6802	0.5
Medium	HTALNTHSV	1	1	1	Q14690		0	6.61399e+06	0.026	0.1866	20.11	4.04669	2	979.495	-0.123878	22.744	0	C1203	70.37	A6802	5.5	A6802	0.03
Medium	YTANFVNAI	2	1	1	Q7L1W4		0	2.93249e+07	0.026	0.1873	18.62	5.67342	2	1012.51	0.203518	71.1887	0	C1203	70.37	A6802	4.5	A6802	0.01
Medium	ETAPRTIFQRV	1	1	1	Q9UBB4		0	454830054	0.026	0.1905	17.59	5.04166	3	1317.73	0.161604	46.4117	0		0	A6802	29.8	A6802	0.3
Medium	FVYENPISL	1	1	1	Q6NTF9		0	2.28101e+07	0.026	0.1895	13.03	19.7129	2	1081.56	-0.13803	82.5272	0	C1203	55.56	C1203	3.5	C1203	0.01
Medium	EASQLGHKV	1	1	1	Q9Y490		0	1.4899e+06	0.026	0.192	12.74	18.5706	2	968.516	-0.349712	20.7567	0	C1203	77.78	A6802	161.7	A6802	1.1
Medium	KQFDRKHHTY	2	1	1	Q9HAY2		0	7.64179e+06	0.026	0.1922	12.09	30.1005	3	1359.69	0.0546287	17.5213	0	C1203	42.86	B1503	5.6	B1503	0.07
Medium	RAASTARHL	1	1	1	P39019		0	1.58218e+06	0.026	0.1911	10.44	18.1362	2	982.554	0.0554497	17.0208	0	C1203	85.19	B1503	127.4	C1203	0.9
Medium	DTHHLVNYI	2	1	1	Q01581		0	2.02251e+07	0.027	0.1945	33.2	0.16843	2	1111.55	-0.17746	48.3556	0	C1203	62.96	A6802	22.9	A6802	0.25
Medium	IQESISQEL	1	1	1	Q9NQ92		0	2.50021e+07	0.027	0.1929	32.2	0.259884	2	1046.54	-0.0446694	76.5171	0	C1203	44.44	B1503	119.4	B1503	2.5
Medium	RAVDFGLSI	1	1	1	O15126		0	3.82389e+06	0.028	0.2043	20.95	2.98229	2	977.541	-0.146184	66.8055	0	C1203	74.07	C1203	18.9	C1203	0.07
Medium	SSHFVPVFV	1	1	1	P32942		0	7.16524e+07	0.028	0.2019	20.36	3.91467	2	1018.54	0.0106329	65.6952	0	C1203	74.07	A6802	23.8	A6802	0.25
Medium	DTVVGVWRV	1	1	1	Q969K4		0	3.66223e+06	0.028	0.202	19.34	4.84044	2	1030.57	0.927667	69.3629	0	C1203	70.37	A6802	22.1	A6802	0.2
Medium	GKKPEEKTY	1	1	1	Q9Y5B9		0	710020	0.028	0.1995	17.7	6.49663	2	1079.57	-0.247991	16.4156	0	C1203	51.85	B1503	297.3	B1503	4
Medium	TTVITTEQA	2	1	1	Q9BYH1		0	2.13122e+07	0.028	0.2	14.09	12.8739	2	963.499	-0.480923	32.7588	0	C1203	29.63	A6802	159.9	A6802	1.1
Medium	IAVNAVLTV	1	1	1	P48643		0	1.32615e+07	0.029	0.2115	33.05	0.103153	2	899.556	-0.218478	76.039	0	C1203	85.19	C1203	15.6	C1203	0.05
Medium	KQMEDGHTLF	1	1	1	Q96T88		0	1.06164e+07	0.029	0.2104	18.99	3.95583	3	1205.56	-0.536956	38.3125	0	C1203	28.57	B1503	3.6	B1503	0.03
Medium	FQAFHSVAF	1	1	1	O94761		0	1.74121e+07	0.029	0.2084	17.45	6.31674	2	1053.51	-3.68402	42.8908	0	C1203	40.74	B1503	1.8	B1503	0.01
Medium	SALEHVVEF	1	1	1	O75581		0	4.6169e+07	0.029	0.2069	11.25	34.7351	2	1030.52	-0.116475	60.7545	0	C1203	81.48	B1503	17	C1203	0.15
Medium	ESASFTVTV	1	1	1	O75147		0	4.21051e+07	0.03	0.2127	33.28	0.115711	2	940.462	-0.102645	65.1813	0	C1203	81.48	A6802	2.6	A6802	0.01
Medium	DVNKVVEYV	1	1	1	P53611		0	9.08296e+06	0.03	0.2134	20.73	4.06537	2	1064.56	-1.59392	56.7408	0	C1203	40.74	A6802	17.4	A6802	0.17
Medium	SQRPAARAF	1	2	2	Q9BTY7;P0CB43		0	6.65312e+06	0.03	0.2164	17.35	8.34054	2	1003.54	-0.589075	23.3388	0	C1203	40.74	B1503	2.8	B1503	0.01
Medium	GQAGMHATY	1	1	1	O96008		0	3.15781e+06	0.03	0.2121	16.51	3.7658	2	935.404	-0.165819	27.3379	0	C1203	48.15	B1503	4.1	B1503	0.03
Medium	ESIKNQMTV	1	1	1	Q14566		0	2.90746e+07	0.03	0.2133	16.22	11.6776	2	1049.53	0.201476	38.0604	0	C1203	70.37	A6802	32.9	A6802	0.3
Medium	HKVISGTTL	6	1	1	Q9NUL3		0	2.55422e+07	0.03	0.2164	15.12	5.54466	2	955.556	-0.857393	28.8725	0	C1203	40.74	B1503	36.3	B1503	0.9
Medium	ETTKLGDFV	1	1	1	Q96AY3		0	1.41146e+07	0.03	0.2151	14.97	11.6717	2	1009.52	-0.0943073	53.8368	0	C1203	66.67	A6802	15.1	A6802	0.15
Medium	FAFPGSTNSL	1	1	1	P16144		0	8.98878e+06	0.031	0.2202	36.27	0.0932979	2	1040.5	-0.912559	76.4119	0	C1203	82.86	C1203	15.8	C1203	0.05
Medium	ESINHVVVF	3	1	1	Q53FT3		0	32048821	0.031	0.2193	21.74	2.89826	2	1043.55	-0.830089	59.1313	0	C1203	70.37	B1503	48.9	C1203	0.8
Medium	EVTLIHSQV	2	1	1	Q9BRQ8		0	2.11304e+07	0.032	0.2238	21.5	1.96986	2	1025.56	-0.30992	46.7862	0	C1203	37.04	A6802	10.9	A6802	0.08
Medium	FSSPHLLEA	2	1	1	Q96H22		0	1.07465e+07	0.032	0.2275	20.06	3.97224	2	1000.51	-0.47508	53.9861	0	C1203	51.85	C1203	21.5	C1203	0.08
Medium	TVSDCVHQV	1	1	1	O95340		0	2.47558e+07	0.032	0.2233	18.45	3.57652	2	987.456	-0.34332	36.7732	0	C1203	48.15	A6802	11.6	A6802	0.09
Medium	EAMRIGAEV	2	2	2	P06733;P13929		0	1.3064e+07	0.032	0.228	13.23	21.3259	2	975.493	-0.0162479	44.2936	0	C1203	77.78	A6802	7	A6802	0.04
Medium	SVHVGQAGV	1	2	2	P68366;Q9NY65		0	4.33285e+06	0.033	0.2287	32.96	0.206705	2	853.453	0.0750512	30.3562	0	C1203	37.04	A6802	95.3	A6802	0.8
Medium	STYPIKNEV	1	1	1	P46977		0	1.62864e+07	0.033	0.2299	22.72	2.28526	2	1050.54	-2.04666	38.3627	0	C1203	81.48	A6802	12.1	A6802	0.1
Medium	SKLGPGEKY	1	2	2	P53805;Q9UKA8		0	2.0486e+07	0.033	0.2301	18.73	5.72511	2	978.525	-0.511303	24.9945	0	C1203	40.74	B1503	143.7	B1503	2.5
Medium	LQKSQAAKEY	1	1	1	Q8N8U3		0	2.21693e+06	0.034	0.2369	19.86	3.46956	2	1165.62	-0.36561	20.9498	0	C1203	28.57	B1503	24.9	B1503	0.6
Medium	EVAKIIYIV	3	1	1	P25788		0	5.23143e+07	0.034	0.237	15.2	2.38425	2	1047.65	0.158288	68.6128	0	C1203	44.44	A6802	3.7	A6802	0.01
Medium	QTSDITEYL	3	1	1	P19447		0	7.73773e+07	0.035	0.242	22.26	1.801	2	1069.5	-0.0121169	72.4189	0	C1203	74.07	A6802	5.6	A6802	0.03
Medium	AECSFVLQDF	1	1	1	B1AJZ9		0	5.25335e+07	0.035	0.24	21.65	1.44818	2	1158.51	-0.459363	48.1803	0	C1203	34.29	B1503	404	B1503	4.5
Medium	VKHTKPRTY	1	1	1	Q8IYA6		0	320293	0.035	0.2423	19.73	2.82104	2	1129.65	-0.152936	16.4965	0	C1203	51.85	B1503	25.2	B1503	0.7
Medium	LVPEFVHNV	2	1	1	Q9HCD6		0	3.46989e+07	0.035	0.2415	15.77	8.48712	2	1053.57	-0.926712	59.045	0	C1203	44.44	A6802	12	A6802	0.1
Medium	AGIVIALLF	1	1	1	Q8N7X8		0	1.6555e+07	0.035	0.2429	12.28	5.61984	2	916.586	-0.61547	67.5842	0	C1203	37.04	B1503	263	B1503	3.5
Medium	KKKANLQYY	1	1	1	P17980		0	4.42358e+06	0.035	0.2397	12.17	14.6921	2	1155.65	-0.374138	22.6592	0	C1203	37.04	B1503	35.5	B1503	0.9
Medium	IKVIPTVF	1	1	1	P14902		0	2.10568e+07	0.035	0.2449	11.24	7.14042	2	916.586	-0.671149	67.8677	0	C1203	33.33	B1503	200.5	B1503	3
Medium	GLASLVQVF	3	1	1	Q5T1A1		0	2.11754e+07	0.036	0.2501	32.11	0.179693	2	933.54	-0.118365	50.8832	0	C1203	44.44	B1503	19	B1503	0.5
Medium	KKNKGGVAV	1	1	1	P11388		0	1.04009e+06	0.036	0.2483	29.34	0.222057	2	900.562	-0.30852	16.3362	0	C1203	40.74	B1503	122.7	B1503	2.5
Medium	NSSPVINHL	1	1	1	Q9Y2I9		0	6.58486e+07	0.036	0.2456	18.31	4.51271	2	980.515	-0.957714	40.194	0	C1203	81.48	A6802	53.6	A6802	0.5
Medium	DVINQTWTA	1	1	1	P62256		0	8.25866e+06	0.036	0.2509	17.37	8.9591	2	1047.51	0.07295	68.5683	0	C1203	3.7	A6802	49.7	A6802	0.5
Medium	EVSEIHIKV	1	1	1	P30414		0	2.30328e+07	0.036	0.2456	17.29	3.62918	2	1053.59	-1.51723	44.8212	0	C1203	48.15	A6802	4.6	A6802	0.01
Medium	TTIAIPFGTALV	1	1	1	Q5GLZ8		0	4.77261e+07	0.036	0.2462	12.38	11.1023	2	1203.7	-0.202363	97.6928	0		0	A6802	14.4	A6802	0.12
Medium	RKQATTNVY	1	1	1	Q14161		0	2.14874e+06	0.036	0.246	12.24	19.6365	2	1080.58	-0.473948	20.3443	0	C1203	40.74	B1503	6	B1503	0.08
Medium	VHPPPTTTY	1	1	1	Q969N2		0	3.46483e+07	0.036	0.2475	12.18	24.9945	2	1012.51	0.0325517	33.9653	0	C1203	51.85	B1503	62.1	B1503	1.4
Medium	HVYSGKDLI	2	1	1	Q9NR30		0	2.37037e+07	0.036	0.2487	11.41	37.0058	2	1031.55	-0.475041	38.6955	0	C1203	37.04	A6802	90.7	A6802	0.7
Medium	ALGRFSQLY	1	1	1	P48449		0	1.58451e+07	0.037	0.2563	26.11	0.755658	2	1054.57	-0.232017	52.7218	0	C1203	40.74	B1503	54.9	B1503	1.2
Medium	RQIGSVDTF	1	1	1	Q99519		0	4.28244e+06	0.037	0.2566	24.37	1.44483	2	1022.53	-0.700061	44.7057	0	C1203	40.74	B1503	3	B1503	0.01
Medium	KKKPSRNTY	1	1	1	P78524		0	1.25576e+06	0.037	0.2564	20.42	1.4861	2	1121.64	-0.195889	15.8985	0	C1203	48.15	B1503	36.9	B1503	0.9
Medium	RKTPNGLIL	1	1	1	Q9H9Y2		0	1.00379e+07	0.037	0.2546	13.69	3.67063	2	1011.63	-0.385024	36.8673	0	C1203	48.15	B1503	34.2	B1503	0.9
Medium	ETSSWVNLV	2	1	1	Q7Z7N9		0	1.53299e+07	0.037	0.257	13.33	26.3194	2	1034.52	-0.269743	81.6707	0	C1203	77.78	A6802	4.6	A6802	0.01
Medium	LTAFASNPEF	1	1	1	Q9Y4G6		0	5.67905e+07	0.037	0.2568	12.06	26.7714	2	1096.53	0.158891	69.0397	0	C1203	45.71	B1503	33	B1503	0.8
Medium	MVYSLPILV	1	1	1	Q8WWZ7		0	3.74485e+06	0.037	0.2544	11.84	16.7751	2	1034.59	-3.19026	106.122	0	C1203	51.85	A6802	6.2	A6802	0.03
Medium	HTVGIIVKT	1	1	1	Q96QT6		0	1.62124e+07	0.037	0.2541	11.29	6.81349	2	967.594	0.275218	34.8863	0	C1203	40.74	A6802	29.3	A6802	0.3
Medium	TTSKPSHLV	1	1	1	Q16576		0	5.24186e+06	0.038	0.2581	17.99	4.4527	2	969.536	-0.290782	21.3188	0	C1203	70.37	A6802	10.8	A6802	0.08
Medium	FQNPQTHVI	1	1	1	P22695		0	1.43674e+07	0.038	0.2614	12.49	17.8927	2	1083.56	-0.0445131	42.4649	0	C1203	44.44	B1503	14.5	C1203	0.17
Medium	RKKEADSVY	1	1	1	P18583		0	1.30873e+06	0.038	0.2577	11.17	25.7298	2	1095.58	-0.509639	17.9529	0	C1203	44.44	B1503	7.6	B1503	0.12
Medium	SIIHPQVTF	1	1	1	O75343		0	1.34318e+08	0.039	0.2677	33.35	0.145974	2	1041.57	0.00979768	65.9696	0	C1203	37.04	B1503	70	B1503	1.5
Medium	ESTPIAETI	1	1	1	P42167		0	3.11741e+07	0.039	0.2673	25.74	1.08528	2	960.489	0.243376	57.9197	0	C1203	70.37	A6802	49.8	A6802	0.5
Medium	TTAVPTYQV	1	1	1	Q96PZ0		0	2.42756e+07	0.039	0.2645	15.88	11.9623	2	979.509	-0.065632	56.0873	0	C1203	70.37	A6802	4.4	A6802	0.01
Medium	RKRPNGVSA	1	1	1	Q9NZ63		0	3.86726e+06	0.039	0.2676	13.38	10.3756	2	984.57	0.0197877	16.6576	0	C1203	11.11	B1503	378	B1503	4.5
Medium	RAVALSLLLY	1	1	1	Q8IY34		0	2.73852e+07	0.04	0.2705	19.65	0.651982	2	1118.69	-0.0790806	53.3708	0	C1203	60	B1503	32.4	B1503	0.8
Medium	RQFDHPHIV	1	1	1	Q05397		0	6.97511e+06	0.04	0.2745	17.7	8.0225	2	1148.6	-0.103175	31.5638	0	C1203	48.15	B1503	10.2	B1503	0.2
Medium	EISDIHTKL	1	1	1	Q9UHD2		0	1.35685e+07	0.04	0.2752	13.36	13.715	2	1055.57	-0.25363	37.4696	0	C1203	44.44	A6802	42.2	A6802	0.4
Medium	LQFERLVV	1	1	1	Q9BTU6		0	1.73509e+07	0.041	0.2786	34.51	0.0712597	2	1003.59	0.0729312	62.7702	0	C1203	46.67	B1503	251.3	B1503	3.5
Medium	RKGGPGSTL	2	1	1	Q9BQ61		0	4.14168e+06	0.041	0.2778	11.68	28.3262	2	872.495	-0.386094	18.5839	0	C1203	44.44	B1503	94.8	B1503	1.8
Medium	GQKKQVTVY	1	1	1	Q03468		0	2.87664e+06	0.042	0.2851	19.97	2.43728	2	1050.59	-0.431852	21.3588	0	C1203	44.44	B1503	8.8	B1503	0.17
Medium	VAFPSSSVY	1	1	1	P25205		0	7.43238e+06	0.042	0.2874	15.86	10.3508	2	956.472	0.0610662	65.245	0	C1203	92.59	B1503	4.3	C1203	0.01
Medium	FKRKYGKSL	1	2	2	P07355;A6NMY6		0	1.70514e+06	0.042	0.2833	13.08	6.30057	2	1126.67	-0.142072	19.9042	0	C1203	44.44	B1503	145.4	B1503	2.5
Medium	AAFKPEAY	1	1	1	P52952		0	1.48652e+07	0.043	0.2926	31.54	0.353007	2	896.451	0.0672028	70.844	0	C1203	66.67	B1503	215.7	B1503	3
Medium	HTADIQSEV	2	1	1	P08581		0	2.41535e+07	0.043	0.2904	28.72	0.422232	2	999.475	0.394846	34.0328	0	C1203	77.78	A6802	3	A6802	0.01
Medium	RKPPSSLGM	1	1	1	Q9H7N4		0	5.43032e+06	0.043	0.2916	19.55	3.14396	2	972.529	-0.358752	27.4006	0	C1203	40.74	B1503	249.1	B1503	3.5
Medium	QQNPQPLIF	1	1	1	O00170		0	2.34775e+07	0.043	0.2879	12.69	18.3442	2	1084.58	0.158264	72.7729	0	C1203	44.44	B1503	4.9	B1503	0.05
Medium	GKAFIRSSY	1	1	1	Q8N8L2		0	1.47998e+07	0.044	0.2971	21.07	2.62666	2	1028.55	-0.450943	35.5757	0	C1203	40.74	B1503	17.9	B1503	0.5
Medium	ETQSRTITV	2	1	1	Q09666		0	3.78889e+07	0.044	0.298	17.3	7.20814	2	1034.55	-0.398716	31.7722	0	C1203	77.78	A6802	27.7	A6802	0.25
Medium	YKVFREEKY	1	1	1	O43813		0	8.32091e+06	0.044	0.295	14.05	18.5952	3	1261.66	-0.181533	31.5195	0	C1203	40.74	B1503	102.6	B1503	1.9
Medium	NTSHILEAI	1	1	1	Q9BY84		0	2.03054e+07	0.045	0.2996	24.87	1.02378	2	997.531	-0.390877	51.411	0	C1203	62.96	A6802	5.6	A6802	0.03
Medium	GKTSLVVSY	1	1	1	Q7L0Q8		0	2.36291e+07	0.045	0.302	23.36	0.90672	2	953.53	-0.502952	46.442	0	C1203	48.15	B1503	17.2	B1503	0.5
Medium	AKSGVGTAL	1	1	1	P02786		0	6.38485e+06	0.046	0.3053	26.27	0.723133	2	803.462	-0.817569	26.22	0	C1203	48.15	B1503	53.4	B1503	1.2
Medium	FANGHVNSV	1	1	1	Q9NRL2		0	5.22363e+06	0.046	0.3077	20.25	2.90724	2	944.459	0.120098	29.5191	0	C1203	85.19	C1203	5	C1203	0.01
Medium	EVANHVVQA	1	1	1	Q9HCH0		0	6.87365e+06	0.046	0.3029	17.4	6.90395	2	966.5	-0.514027	28.0888	0	C1203	11.11	A6802	16.6	A6802	0.15
Medium	RKIQGIEEY	1	1	1	Q9Y6G9		0	3.86583e+06	0.046	0.3035	14.12	14.3576	2	1135.61	0.431735	33.0146	0	C1203	44.44	B1503	12.1	B1503	0.3
Medium	RMAEERRKY	1	1	1	P55081		0	4.07576e+06	0.046	0.3076	13.52	23.103	3	1238.64	0.489369	17.4859	0	C1203	48.15	B1503	11	B1503	0.25
Medium	LEFNTVVKL	1	1	1	P29536		0	1.12443e+07	0.046	0.3064	12.82	10.1267	2	1062.62	-0.219341	69.4333	0	C1203	48.15	B1503	71.5	B1503	1.5
Medium	RQFMDRTHY	1	1	1	P0C7U1		0	4.40562e+06	0.046	0.3034	11.05	25.4142	3	1253.58	-0.239874	28.7184	0	C1203	40.74	B1503	2.7	B1503	0.01
Medium	STAGLPTAGL	1	1	1	Q765P7		0	1.71481e+08	0.047	0.3113	36.33	0.121084	2	887.483	-0.272089	62.1272	0	C1203	48.57	A6802	14.8	A6802	0.15
Medium	LLVDQSKIY	1	1	1	O15403		0	5.98183e+07	0.047	0.311	21.88	1.24213	2	1078.61	-0.920118	57.8537	0	C1203	44.44	B1503	54.6	B1503	1.2
Medium	RQTKTGTAL	1	1	1	Q8WXE0		0	989060	0.047	0.3137	20.81	2.64432	2	975.558	-0.497642	18.2256	0	C1203	37.04	B1503	4.4	B1503	0.04
Medium	ETFGQYPLQV	1	1	1	Q96RU2		0	1.05532e+07	0.047	0.314	19.02	5.34339	2	1181.58	0.0309188	77.8748	0	C1203	60	A6802	10.6	A6802	0.08
Medium	EVPHFHHEL	1	1	1	Q53EL6		0	1.84494e+07	0.047	0.3129	13.28	15.5018	2	1144.55	-0.7981	33.3659	0	C1203	40.74	A6802	28.3	A6802	0.3
Medium	AQPPVGAAY	1	1	1	Q96SN8		0	7888180	0.048	0.317	21.67	3.79325	2	873.447	0.126553	44.9248	0	C1203	48.15	B1503	7.2	B1503	0.12
Medium	ESWDKILAL	1	1	1	P49642		0	1.15125e+07	0.048	0.3195	18.47	7.07964	2	1074.58	-0.895652	81.1884	0	C1203	77.78	C1203	234.1	C1203	1
Medium	IKHSGNITF	1	1	1	P30050		0	5.93943e+06	0.048	0.3169	16.97	8.51454	2	1016.55	0.684519	30.7666	0	C1203	40.74	B1503	4	B1503	0.03
Medium	KKILQKGQTAY	1	2	2	Q5SVZ6;Q5VZL5		0	2.34335e+06	0.048	0.3193	12.08	6.56917	3	1277.76	0.20848	22.0851	0		0	B1503	272.9	B1503	3.5
Medium	VSMGELWAF	1	1	1	O43246		0	3.5444e+07	0.048	0.3161	11.53	24.611	2	1039.49	2.54072	80.1767	0	C1203	66.67	B1503	26.6	B1503	0.7
Medium	ASVCWLPLL	1	1	1	P21731		0	2.63991e+07	0.049	0.3251	24.08	1.64231	2	1001.55	-0.452122	99.5405	0	C1203	70.37	C1203	368.7	C1203	1.4
Medium	LKNGALVVY	1	1	1	Q8IVB5		0	1.06093e+07	0.049	0.3243	23.15	0.855533	2	976.582	-0.565699	49.3831	0	C1203	48.15	B1503	6.1	B1503	0.08
Medium	RAYDGTTYL	1	1	1	Q53GS9		0	4.36669e+07	0.049	0.3234	11.01	30.8283	2	1059.51	-0.369855	46.3305	0	C1203	81.48	C1203	4.5	C1203	0.01

## Sheet: Statistics
Total_Peptides	Tool	A*68:02	B*15:03	C*12:03
1846	Total Syfpeithi allelecoverage with threshold	0	0	578
	Total Syfpeithi allelecoverage with threshold %	0.0000	0.0000	0.3131
	Total NetMHC allelecoverage with threshold	733	859	593
	Total NetMHC allelecoverage with threshold %	0.3971	0.4653	0.3212
	Total NetMHC allelecoverage with 50nM threshold	517	572	242
	Total NetMHC allelecoverage with 50nM threshold %	0.2801	0.3099	0.1311
	Best Syfpeithi	0	0	1755
	Best Syfpeithi %	0.0000	0.0000	0.9507
	Best NetMHC	709	867	270
	Best NetMHC %	0.3841	0.4697	0.1463
	Best Syfpeithi with threshold	0	0	578
	Best Syfpeithi with threshold %	0.0000	0.0000	0.3131
	Best NetMHC with threshold	632	732	221
	Best NetMHC with threshold %	0.3424	0.3965	0.1197
	Best NetMHC with 50nM threshold	484	540	142
	Best NetMHC with 50nM threshold %	0.2622	0.2925	0.0769
