# Supplementary material for: TAPBPR mediates peptide dissociation from MHC class I using a leucine lever
Source: eLife. 2018 Nov 28;7:e40126. doi: 10.7554/eLife.40126 (PMC6307860; doi:10.7554/eLife.40126)
Supplement: Figure 5—source data 7. [file elife-40126-fig5-data7.xlsx]

## Sheet: Filteredpeptides
A2	Sequence	# PSMs	# Proteins	# Protein Groups	Protein Group Accessions	Modifications	ΔCn	Area	q-Value	PEP	IonScore	Exp Value	Charge	MH+ [Da]	ΔM [ppm]	RT [min]	# Missed Cleavages	best_Syf_Allele	best_Syf_Score	best_NetMHC_Allele	best_NetMHC_Score	best_NetMHC_Allele_Rank	best_NetMHC_Rank
High	AAYSDGYGRVY	21	1	1	O43251		0	5.73151e+07	0	7.59463e-13	76.82	5.80131e-06	2	1221.55	0.0107205	45.6372	0		0	B1503	57.2	B1503	1.3
High	KLFGSTSSF	39	1	1	P08174		0	2.75267e+08	0	4.046e-09	73.72	2.16959e-05	2	973.498	-0.639637	51.4397	0	C1203	37.04	B1503	2.9	B1503	0.01
High	FASGLIHRV	115	1	1	Q8N6L1		0	2.73757e+09	0	8.325e-08	72.63	1.36658e-05	2	999.573	-0.914326	40.7363	0	C1203	88.89	A6802	15.6	C1203	0.08
High	YKIGDLTGY	28	1	1	Q9NVN8		0	2.14029e+08	0	4.146e-08	71.99	2.27637e-05	2	1029.52	-0.798144	60.0951	0	C1203	44.44	B1503	19.3	B1503	0.5
High	MSYAEVMRL	8	1	1	O43681		0	8.21666e+06	0	2.085e-07	69.53	3.62201e-05	2	1099.53	-0.118188	66.0038	0	C1203	74.07	C1203	11.7	C1203	0.03
High	SAYGSVKAY	22	2	2	P07355;A6NMY6		0	4.93469e+08	0	4.914e-07	68.25	6.82658e-05	2	945.467	-0.971897	34.6376	0	C1203	88.89	B1503	7.5	C1203	0.01
High	IKYDPSIGIY	6	1	1	P62913		0	1.76271e+07	0	1.611e-08	68.03	4.57163e-05	2	1168.62	-0.588892	62.3775	0	C1203	42.86	B1503	13.3	B1503	0.3
High	AAANAIRVY	6	1	1	Q9NRK6		0	1.94398e+07	0	4.603e-07	68	5.4663e-05	2	948.526	-0.590359	39.5037	0	C1203	92.59	B1503	11.3	C1203	0.12
High	MASALVHIL	27	1	1	Q5VWQ8		0	5.37246e+07	0	5.855e-07	66.84	4.05851e-05	2	954.544	0.217719	64.694	0	C1203	81.48	C1203	22.8	C1203	0.09
High	IAAVIARFY	10	1	1	P40305		0	1.58696e+07	0	1.9e-07	65.77	4.19787e-05	2	1023.6	-0.896301	65.7834	0	C1203	81.48	B1503	76.7	C1203	0.4
High	NTVDFFNQI	58	2	2	Q9H8S9;Q7L9L4		0	7.84714e+08	0	1.618e-06	65.62	0.000102507	2	1097.53	-0.620492	84.8216	0	C1203	62.96	A6802	3.5	A6802	0.01
High	ILGPPGSVY	42	3	3	P51965;Q96LR5;Q969T4		0	7.56052e+07	0	4.59e-07	65.3	0.000190825	2	902.498	-0.219237	65.1511	0	C1203	48.15	B1503	14.6	B1503	0.4
High	GAYGQAVRY	14	1	1	Q9UID3		0	3.9949e+07	0	6.834e-05	64.44	0.000112188	2	984.49	-0.173403	36.2902	0	C1203	85.19	B1503	41.5	C1203	0.5
High	SGFSGVIRL	29	1	1	P11309		0	5.20518e+07	0	4.047e-08	64.03	0.000113964	2	935.531	-0.402043	62.4492	0	C1203	51.85	C1203	196.7	C1203	0.8
High	AKVKFEERY	13	1	1	P61353		0	101885808	0	5.501e-08	63.82	0.000132163	2	1169.63	-0.509902	27.2721	0	C1203	40.74	B1503	162.6	B1503	2.5
High	AAFLKAIGY	27	1	1	O75533		0	1.18006e+08	0	1.95e-09	63.62	0.000100958	2	953.545	-0.194658	62.7612	0	C1203	85.19	B1503	29.1	B1503	0.7
High	TVARPSVPA	20	1	1	P08174		0	1.05735e+09	0	0.001332	63.43	7.4628e-05	2	897.514	-1.34328	31.949	0	C1203	7.41	A6802	24.4	A6802	0.25
High	AAASAIKVI	8	1	1	P14902		0	1.2366e+07	0	0.0002303	63.42	0.000114975	2	843.53	0.0871638	43.5462	0	C1203	88.89	C1203	146	C1203	0.7
High	AKFDGILGM	12	1	1	P07339		0	3.01037e+07	0	6.758e-05	63.4	0.000166997	2	951.496	-0.585232	66.6965	0	C1203	48.15	B1503	19.2	B1503	0.5
High	IGVDFALKV	16	2	2	Q13637;P57729		0	1.3509e+07	0	1.469e-05	62.17	0.000130661	2	961.571	-0.43121	71.8854	0	C1203	44.44	C1203	353	C1203	1.3
High	AKAPPPVFY	46	1	1	Q16643		0	74930039	0	2.686e-06	62.11	0.000250131	2	989.545	-0.742697	47.8699	0	C1203	59.26	B1503	18.2	B1503	0.5
High	STSDIITRI	66	2	2	P49585;Q9Y5K3		0	1790302035	0	1.562e-05	62.11	0.000185014	2	1005.56	-0.848362	52.8012	0	C1203	70.37	A6802	16.4	A6802	0.15
High	AKLPFTPLSY	22	1	1	Q9UM00		0	4.27485e+07	0	3.048e-08	62.06	0.000175582	2	1136.63	-0.433048	71.2768	0	C1203	48.57	B1503	14.2	B1503	0.4
High	SKFPTQISL	21	1	1	O15164		0	3.57922e+07	0	0.001159	61.96	0.000199922	2	1020.57	-1.16177	59.4163	0	C1203	51.85	B1503	28.7	B1503	0.7
High	DTAEIIKTL	29	1	1	P82909		0	7.37319e+07	0	3.104e-06	61.72	0.000186179	2	1003.57	0.0128545	62.5777	0	C1203	85.19	A6802	32.9	A6802	0.3
High	IATSQNRIY	9	1	1	Q99623		0	4.56936e+07	0	5.722e-07	61.52	0.000246784	2	1065.57	-0.217964	34.2413	0	C1203	81.48	B1503	96.5	C1203	1.5
High	ITGPLIRIL	15	1	1	Q92616		0	2.19448e+07	0	2.92e-07	60.77	1.49499e-05	2	995.661	-0.602821	72.4771	0	C1203	81.48	C1203	675.2	C1203	2
High	YGYDNVKEY	15	1	1	Q96GN5		0	4.9664e+07	0	9.994e-08	60.69	0.000178426	2	1150.5	-0.183301	45.1585	0	C1203	59.26	C1203	8.5	C1203	0.01
High	SQFGGGSQY	27	1	1	O15371		0	2.80823e+08	0	0.0003308	60.21	0.000129247	2	930.395	-0.614165	40.7037	0	C1203	44.44	B1503	2.6	B1503	0.01
High	SQYPFPVTL	29	1	1	Q5R372		0	1.42635e+08	0	6.467e-06	60.2	0.000428792	2	1051.55	-0.653976	85.7574	0	C1203	59.26	B1503	4.8	B1503	0.05
High	LAVPFCVNF	19	1	1	Q9Y266		0	3.84364e+07	0	6.366e-05	59.89	0.000453441	2	1009.52	-0.157186	99.1155	0	C1203	77.78	B1503	27	B1503	0.7
High	DQAEIRSLV	26	2	2	P09913;O14879		0	6.92474e+07	0	2.864e-05	59.3	0.000566771	2	1030.55	-0.137205	54.2761	0	C1203	44.44	A6802	234.1	A6802	1.4
High	AAFDGHAREL	7	1	1	Q3MIP1		0	1.84884e+07	0	1.325e-07	59.14	0.000393063	2	1086.53	-0.317587	33.3638	0	C1203	82.86	C1203	368.1	C1203	1.4
High	LVANIIQNV	23	1	1	O94915		0	4.22452e+07	0	0.001431	59.03	0.000190602	2	983.589	0.160952	71.5328	0	C1203	44.44	A6802	15.3	A6802	0.15
High	AASALIRTL	13	1	1	Q13535		0	2.83235e+07	0	6.103e-08	58.86	0.000295073	2	915.562	-0.132102	49.9954	0	C1203	92.59	C1203	106.2	C1203	0.5
High	SAAEEVKTY	4	1	1	Q5JRA6		0	1.52193e+07	0	7.4e-07	58.67	0.000353637	2	997.483	-0.500664	30.0871	0	C1203	92.59	B1503	74	C1203	0.4
High	SSAPTARVF	39	1	1	O94906		0	1.96894e+08	0	3.149e-05	58.09	0.000608225	2	935.494	-1.04055	38.3923	0	C1203	77.78	B1503	17.5	C1203	0.17
High	IKISEGTGF	7	1	1	Q9Y2R4		0	1.33484e+07	0	1.614e-05	58.01	0.000539838	2	951.515	-0.049746	48.3295	0	C1203	33.33	B1503	7.2	B1503	0.12
High	DVAEFLYQV	27	1	1	Q9Y5M8		0	8.74396e+07	0	0.0002686	57.83	0.000608831	2	1083.54	-0.270698	95.0569	0	C1203	44.44	A6802	3	A6802	0.01
High	AAQEAVKLY	12	1	1	O60506		0	2.73426e+07	0	1.3e-05	57.81	0.000667606	2	992.541	-0.52927	42.217	0	C1203	88.89	B1503	68.4	C1203	0.9
High	NAANIFERL	18	2	2	Q9Y6D6;Q9Y6D5		0	2.56746e+07	0	1.123e-06	57.67	0.00071624	2	1047.56	-0.41472	62.1806	0	C1203	77.78	A6802	36.5	A6802	0.4
High	MAVEFLHEL	7	1	1	Q9NR45		0	7.10383e+06	0	8.552e-07	57.58	0.000825163	2	1088.54	-0.0644048	73.061	0	C1203	81.48	C1203	10.3	C1203	0.03
High	GKIGTVMTF	24	1	1	P30046		0	5.02144e+07	0	1.714e-06	57.33	0.000555058	2	953.513	0.0403831	54.65	0	C1203	40.74	B1503	6	B1503	0.08
High	SAMPTVRSF	55	1	1	Q03518		0	5.84522e+08	0	2.92e-08	57.32	0.000568756	2	995.498	-0.203955	48.5595	0	C1203	81.48	B1503	6	C1203	0.02
High	EISSILQEL	15	2	2	Q96L14;Q5SW79		0	1.03102e+08	0	0.0001186	57.19	0.000755442	2	1031.56	-0.141652	89.3696	0	C1203	48.15	A6802	41.7	A6802	0.4
High	GKVGFQSFF	21	1	1	P60903		0	2.90572e+07	0	9.882e-08	56.87	0.000743924	2	1016.52	-0.394893	68.2823	0	C1203	33.33	B1503	24.8	B1503	0.6
High	GQYGNPLNKY	57	1	1	O14672		0	1.15278e+09	0	3.236e-06	56.87	0.000726038	2	1153.56	-0.339192	44.3538	0	C1203	34.29	B1503	14.8	B1503	0.4
High	AAYGYGIRY	33	3	3	P11216;P06737;P11217		0	1.66339e+08	0	0.0001676	56.81	0.000857664	2	1033.51	-0.464579	50.2284	0	C1203	88.89	B1503	8.9	C1203	0.15
High	SKYEALQTF	7	2	2	O15525;O60675		0	2.40106e+07	0	5.973e-08	56.74	0.000776697	2	1086.55	-0.855375	50.0325	0	C1203	40.74	B1503	3.8	B1503	0.03
High	TAVALLRLL	3	1	1	Q14165		0	15427489	0	1.604e-06	56.49	9.65991e-05	2	969.645	-0.719104	81.9874	0	C1203	77.78	C1203	109.9	C1203	0.5
High	NAYDFImKL	18	1	1	P08183	M7(Oxidation)	0	2.13897e+07	0	1.739e-07	56.46	0.000834636	2	1130.56	-0.00441404	72.8805	0	C1203	85.19	C1203	13.6	C1203	0.04
High	VTYNYPVHY	15	1	1	Q9NV96		0	3.34166e+07	0	9.053e-08	56.14	0.00080737	2	1155.55	0.0981086	52.1629	0	C1203	81.48	B1503	24.7	C1203	0.12
High	SKLSFSQVF	14	1	1	Q9UJX4		0	3.72283e+07	0	1.646e-08	56.11	0.000928685	2	1042.56	-0.352227	63.3153	0	C1203	37.04	B1503	4.2	B1503	0.04
High	AKWNPTAGVAF	28	1	1	P19387		0	5.73536e+07	0	3.314e-06	55.95	0.0010916	2	1161.61	-0.0268268	61.8184	0		0	B1503	59.9	B1503	1.3
High	LTFAGVKMY	3	1	1	P58511		0	5.82244e+06	0	6.034e-08	55.92	0.00100028	2	1029.54	-0.29787	68.331	0	C1203	77.78	C1203	32	C1203	0.15
High	SQIRQSTAY	4	1	1	O43150		0	1.90589e+07	0	0.001116	55.53	0.00102919	2	1053.53	-0.439806	27.1264	0	C1203	37.04	B1503	3.2	B1503	0.02
High	NVVDVFHAV	19	1	1	Q15262		0	7.41377e+07	0	1.196e-05	55.49	0.00103871	2	999.526	-0.291144	64.5781	0	C1203	40.74	A6802	2.5	A6802	0.01
High	GKVGGLLAF	29	1	1	P28340		0	6.20932e+07	0	8.119e-05	55.13	0.000589099	2	861.519	0.0155633	62.6326	0	C1203	37.04	B1503	8.7	B1503	0.17
High	AGYQHIRMY	18	1	1	Q9BVC4		0	5.15028e+07	0	9.919e-05	55.13	0.00111912	2	1138.55	-0.482549	37.0558	0	C1203	51.85	B1503	27.6	C1203	0.5
High	YAYDGKDYIAL	36	16	16	P01892;P30447;P05534;P10316;P01889;P30460;Q04826;P30479;P30480;P30486;P18464;P30490;P30498;Q31610;P30499;P04222		0	3.25298e+08	0	6.471e-06	55.08	0.00113472	2	1291.62	0.385545	65.3084	0		0	C1203	280.6	C1203	1.1
High	RKFTQLREY	8	1	1	O95625		0	2.07394e+07	0	1.056e-07	54.99	0.000802534	3	1240.68	0.270856	29.3655	0	C1203	48.15	B1503	7.3	B1503	0.12
High	TVIAKVNNV	22	1	1	P26639		0	7.9033e+07	0	0.0002429	54.76	0.000855539	2	957.572	-1.27458	35.388	0	C1203	40.74	A6802	11.7	A6802	0.09
High	RLYGPSSVSF	20	1	1	P50454		0	7.41128e+07	0	1.499e-06	54.67	0.00130984	2	1112.57	-0.976122	56.4111	0	C1203	42.86	B1503	5.4	B1503	0.06
High	FVFPGELLL	75	1	1	Q15758		0	1.45325e+08	0	1.748e-05	54.65	0.000878342	2	1034.59	-0.650534	105.526	0	C1203	55.56	C1203	10.8	C1203	0.03
High	TVAQIKATV	27	1	1	Q8IXM2		0	40910346	0	0.0001118	54.46	0.000794616	2	930.561	-0.486087	38.0303	0	C1203	44.44	A6802	10.7	A6802	0.08
High	MSSSVVVRL	17	1	1	A0JNW5		0	4.21152e+07	0	2.195e-05	54.07	0.00150292	2	977.545	-0.15955	50.9767	0	C1203	81.48	A6802	26	C1203	0.17
High	VKVDELSLY	10	1	1	Q9BUR5		0	1.06484e+07	0	1.053e-07	54.02	0.000953049	2	1065.58	-0.91843	61.8759	0	C1203	44.44	B1503	22.8	B1503	0.6
High	SQLDSVRVW	3	1	1	Q92922		0	1.13073e+07	0	0.0002049	54.02	0.00157639	2	1089.57	-1.57595	59.6102	0	C1203	14.81	B1503	36.3	B1503	0.9
High	ALIEFIRSEY	25	1	1	P26639		0	2.30229e+08	0	4.689e-11	54.02	0.00135626	2	1240.66	0.403933	73.6122	0	C1203	31.43	B1503	60.8	B1503	1.3
High	FTADFVRQL	29	1	1	Q96Q15		0	6.22655e+07	0	2.71e-05	53.94	0.00145696	2	1096.58	-0.520502	66.5341	0	C1203	85.19	C1203	7.7	C1203	0.01
High	DLMAPQPGV	17	1	1	Q96B49		0	1.71284e+07	0	0.001078	53.64	0.00142838	2	927.46	-0.0598599	64.6263	0	C1203	37.04	A6802	189.8	A6802	1.2
High	YLADIFTKL	23	1	1	Q49AG3		0	4.67763e+07	0	1.511e-07	53.63	0.000964128	2	1083.61	-0.510835	80.9003	0	C1203	48.15	C1203	22.6	C1203	0.09
High	VKGVSLSSY	11	1	1	Q9Y3B1		0	1.36095e+07	0	0.0009333	53.6	0.00103607	2	939.514	-0.67874	42.8966	0	C1203	40.74	B1503	15.2	B1503	0.4
High	YCAEIAHNV	76	1	1	P62910		0	3.16649e+08	0	1.046e-05	53.4	0.00122248	2	1019.46	-1.30428	41.0211	0	C1203	48.15	A6802	42.5	A6802	0.4
High	GQYPTQPTY	47	1	1	Q15038		0	1499718089	0	0.0002367	53.34	0.00165103	2	1054.48	-0.999111	48.0327	0	C1203	51.85	B1503	3.1	B1503	0.01
High	IALPSLRIL	37	1	1	P00403		0	1.20386e+08	0	9.196e-06	53.31	8.32987e-05	2	995.661	-0.602821	81.1395	0	C1203	85.19	C1203	139.2	C1203	0.7
High	AKAPPTACY	66	1	1	P17676		0	2.80832e+08	0	6.547e-05	53.28	0.00238401	2	921.45	-0.225411	31.3038	0	C1203	51.85	B1503	9.8	B1503	0.2
High	SVSPVVRVAV	104	1	1	P13639		0	3415035551	0	5.558e-06	53.01	0.000752802	2	1012.62	0.0864774	50.6146	0	C1203	25.71	A6802	26.4	A6802	0.25
High	EVAELFQRL	34	1	1	Q4V328		0	1.9063e+08	0	1.793e-05	52.9	0.00199529	2	1104.6	0.0585704	68.903	0	C1203	44.44	A6802	15.7	A6802	0.15
High	FAFSGVLRA	23	1	1	Q92766		0	1.0503e+08	0	0.0005057	52.74	0.00140477	2	967.536	-0.5398	64.878	0	C1203	55.56	C1203	14.8	C1203	0.05
High	KAFDFPSSF	21	1	1	Q7L945		0	2.46511e+07	0	3.977e-06	52.63	0.00189896	2	1045.5	-0.0213621	68.5779	0	C1203	77.78	B1503	3.2	C1203	0.01
High	KQIFETIYY	20	1	1	P23921		0	5.80889e+07	0	9.831e-08	52.63	0.00234103	2	1204.62	0.0450169	65.4392	0	C1203	40.74	B1503	4.2	B1503	0.04
High	AASSIQRVL	36	2	2	Q5BKT4;Q5I7T1		0	8.74324e+07	0	0.001149	52.62	0.00141732	2	944.552	-0.95396	39.2057	0	C1203	92.59	C1203	411.2	C1203	1.5
High	YQADIERMY	35	1	1	O95573		0	1.62442e+08	0	5.061e-09	52.53	0.00127973	2	1188.54	0.0224557	53.1891	0	C1203	51.85	B1503	5.3	B1503	0.06
High	SISDVIAQV	44	1	1	Q9HCJ1		0	3.59544e+08	0	1.006e-05	52.43	0.00245021	2	931.509	-0.22153	74.635	0	C1203	48.15	A6802	10.4	A6802	0.08
High	AQGPTPRYF	91	1	1	O60427		0	2.72593e+09	0	8.721e-07	52.39	0.00218479	2	1036.52	-0.634777	43.0832	0	C1203	48.15	B1503	8.2	B1503	0.15
High	TAAQVARVL	35	1	1	A5YKK6		0	1.01532e+08	0	0.0004206	52.37	0.00155606	2	928.557	-0.273284	39.824	0	C1203	85.19	C1203	91	C1203	0.5
High	LAKAWPTVL	36	1	1	P31040		0	6.83749e+07	0	0.0001897	52.34	0.00108433	2	998.603	-0.184545	62.7743	0	C1203	81.48	C1203	35.2	C1203	0.15
High	DVSNVIEKV	52	1	1	O94955		0	1.12496e+09	0	0.0009314	52.34	0.00272002	2	1002.55	-0.216431	54.2987	0	C1203	44.44	A6802	30.2	A6802	0.3
High	KQFRPPMGGY	21	1	1	Q9UKK9		0	5.52104e+07	0	8.674e-06	52.2	0.00230027	2	1180.59	-1.07129	40.3963	0	C1203	42.86	B1503	10.3	B1503	0.25
High	GKLGFLASY	17	1	1	Q12772		0	2.09186e+07	0	2.7e-05	51.86	0.00231426	2	955.525	-0.0790122	62.4427	0	C1203	40.74	B1503	11.9	B1503	0.3
High	DTAEIFHSA	38	1	1	Q92538		0	1.14801e+08	0	0.0005498	51.77	0.00241228	2	990.453	-0.242402	47.0237	0	C1203	37.04	A6802	3.4	A6802	0.01
High	IAFPSANEV	22	1	1	Q9NXH9		0	2.15819e+07	0	0.0011	51.73	0.00446433	2	947.483	-0.254859	65.9711	0	C1203	88.89	C1203	10.6	C1203	0.03
High	EVNSGIYRV	33	1	1	Q0VDF9		0	1.07648e+08	0	0.0002058	51.55	0.0028823	2	1036.54	0.060419	42.9462	0	C1203	44.44	A6802	9.6	A6802	0.07
High	AKYESQTSF	7	1	1	Q9P0U4		0	3.51766e+07	0	1.032e-06	51.41	0.00227383	2	1060.49	-0.610298	33.3587	0	C1203	40.74	B1503	2.8	B1503	0.01
High	STYIKKIGY	23	2	2	P68104;Q5VTE0		0	3.01239e+07	0	2.28e-05	51.32	0.00320546	2	1072.6	-1.3041	35.9704	0	C1203	74.07	B1503	514.4	C1203	2
High	AKFSLPVSL	8	1	1	Q12980		0	1.11561e+07	0	0.0006239	51.26	0.00161118	2	961.571	-0.42081	71.1742	0	C1203	55.56	B1503	15.7	B1503	0.4
High	YKAAAGEDY	8	1	1	P23381		0	121145070	0	5.52e-05	51.26	0.00189175	2	987.442	0.0504281	29.1356	0	C1203	44.44	B1503	35.3	B1503	0.9
High	IAFPTSISV	28	1	1	Q9UQ80		0	3.66744e+08	0	5.824e-05	51.24	0.00245818	2	934.524	-0.380782	81.2908	0	C1203	88.89	C1203	10.8	C1203	0.03
High	VASDLVMKV	19	1	1	Q9NYU2		0	3.7764e+07	0	0.0004367	50.56	0.00330996	2	961.538	-0.378168	51.9948	0	C1203	88.89	C1203	60.3	C1203	0.3
High	EVLDFITHL	27	1	1	Q13057		0	4.89992e+08	0	5.467e-06	50.56	0.0037565	2	1086.58	-0.0901533	86.8074	0	C1203	44.44	A6802	17.7	A6802	0.17
High	YKLLGGLAV	48	1	1	P23396		0	2.40603e+08	0	0.0001076	50.47	0.00080275	2	933.576	-0.448513	67.7268	0	C1203	44.44	B1503	53.1	B1503	1.2
High	NASPVISSV	27	1	1	Q96T58		0	1.08546e+08	0	0.001017	50.21	0.0054438	2	873.467	-0.306262	48.8525	0	C1203	88.89	A6802	8.5	A6802	0.06
High	TASPVIKAV	34	1	1	Q8WU10		0	8.73531e+08	0	0.0008615	50.07	0.00237147	2	885.54	-0.60725	37.0866	0	C1203	92.59	C1203	69.4	C1203	0.4
High	SAVDFIRTL	37	1	1	Q9UEE5		0	4.46076e+08	0	0.0002235	50.06	0.00314771	2	1021.57	-0.404241	71.7833	0	C1203	88.89	C1203	13.9	C1203	0.04
High	LVASVRVPA	35	1	1	P42126		0	1.36509e+08	0	0.0009056	50.04	0.000855088	2	911.567	-0.761706	44.5734	0	C1203	11.11	A6802	29.4	A6802	0.3
High	EVYPFGIVGM	14	1	1	O75534		0	3.30871e+07	0	1.535e-05	49.97	0.00380318	2	1111.55	0.0564122	95.896	0	C1203	28.57	A6802	35.5	A6802	0.4
High	DAARAIAGV	7	1	1	O75821		0	2.10916e+07	0	0.0002721	49.91	0.00437932	2	843.468	-0.194498	41.3576	0	C1203	81.48	A6802	5.9	A6802	0.03
High	NAYSRILQA	20	1	1	O15230		0	6.32141e+07	0	0.0001076	49.59	0.00422623	2	1035.56	-0.282334	48.5416	0	C1203	51.85	C1203	103	C1203	0.5
High	IKENPSSQY	2	1	1	O75496		0	9.16476e+06	0	1.67e-05	49.5	0.00491725	2	1065.52	-0.320733	27.7278	0	C1203	37.04	B1503	107.2	B1503	2
High	AQNPANMSKY	5	2	2	P50502;Q8NFI4		0	2.78787e+07	0	3.255e-06	49.47	0.00298888	2	1123.52	-0.799864	31.8201	0	C1203	34.29	B1503	7.9	B1503	0.15
High	ETIPSEIQVFV	26	1	1	Q15646		0	1.92591e+08	0	6.852e-07	49.38	0.00541085	2	1261.67	-0.46255	90.2541	0		0	A6802	12.4	A6802	0.1
High	TLADVLYHV	19	1	1	Q9UBL3		0	3.6446e+07	0	3.817e-05	49.37	0.00646325	2	1030.56	-0.465076	71.5226	0	C1203	44.44	A6802	5.7	A6802	0.03
High	GKFGGDFLVY	30	1	1	Q9BSV6		0	1.57156e+08	0	0.0001308	49.34	0.00457676	2	1102.56	-0.231414	69.5293	0	C1203	54.29	B1503	9.5	B1503	0.2
High	TQmPDPKTF	16	1	1	Q9Y5V0	M3(Oxidation)	0	1.82182e+07	0	0.0003582	49.32	0.004402	2	1080.5	-0.430563	34.8419	0	C1203	48.15	B1503	4.4	B1503	0.04
High	SIAGIFKEV	25	1	1	Q9NQQ7		0	5.57278e+07	0	3.164e-05	49.3	0.00346536	2	963.551	-0.126009	65.5593	0	C1203	51.85	A6802	19.4	A6802	0.17
High	GKITDFIKF	16	1	1	P62701		0	2.80401e+07	0	0.0002234	49.28	0.00272477	2	1068.61	-0.388602	65.4547	0	C1203	33.33	B1503	26.5	B1503	0.7
High	SMGPVRVAF	27	1	1	P29279		0	79374153	0	0.0002075	49.24	0.0032914	2	963.508	0.0560188	56.9456	0	C1203	40.74	B1503	8	B1503	0.15
High	VQGIFVEKY	17	3	3	P62834;P61224;A6NIZ1		0	4.86796e+07	0	2.357e-05	49.03	0.00392144	2	1082.59	-0.723662	55.2477	0	C1203	44.44	B1503	47.3	B1503	1.1
High	ASYPELRLF	43	1	1	O75718		0	1.19004e+08	0	9.072e-08	48.95	0.00456806	2	1095.58	0.0550594	73.8631	0	C1203	77.78	B1503	26.2	C1203	0.4
High	GQFSKPFSF	10	1	1	P35658		0	7.5416e+06	0	0.001112	48.89	0.00399051	2	1044.52	0.106219	62.0263	0	C1203	40.74	B1503	2.8	B1503	0.01
High	IKMDASLGNL	13	1	1	Q92520		0	1.50245e+07	0	3.96e-05	48.87	0.00570175	2	1061.57	-0.627455	60.059	0	C1203	34.29	B1503	171	B1503	3
High	TTYEGIFKTL	33	1	1	Q8WWM7		0	105228955	0	1.191e-05	48.7	0.00495339	2	1172.62	-0.106424	68.687	0	C1203	54.29	A6802	55.7	A6802	0.5
High	SALEVVRKY	25	1	1	Q92797		0	2.82725e+07	0	6.806e-06	48.57	0.00283967	2	1064.61	-1.03235	38.2631	0	C1203	85.19	B1503	104.7	C1203	0.6
High	ALCDIKQAY	16	1	1	P25789		0	2.96764e+07	0	1.685e-06	48.46	0.00559123	2	1024.51	-1.07245	49.5918	0	C1203	44.44	B1503	144	B1503	2.5
High	YAFPKAVSVF	26	1	1	O15427		0	163704554	0	1.343e-06	48.46	0.00470949	2	1128.61	-0.142763	71.9378	0	C1203	77.14	B1503	5.9	C1203	0.04
High	FGFPGERTY	41	1	1	Q9Y4K0		0	3.7027e+08	0	1.815e-08	48.45	0.00390731	2	1073.5	-0.964487	56.2487	0	C1203	59.26	B1503	10.2	C1203	0.04
High	KASPLTFTV	21	1	1	P09884		0	7.49932e+07	0	0.0009615	48.09	0.00444448	2	963.551	-0.242319	57.5286	0	C1203	88.89	C1203	66.2	C1203	0.3
High	VAIQSVRCY	10	1	1	P20674		0	4.91677e+07	0	2.393e-07	48.08	0.00433725	2	1038.54	-0.728967	48.1482	0	C1203	85.19	B1503	45.3	C1203	0.6
High	KGSSAVRVY	4	1	1	P10914		0	7.45478e+07	0	0.001032	47.94	0.00472441	2	966.536	-0.580308	22.8118	0	C1203	55.56	B1503	38.4	B1503	0.9
High	RLYFSQQTY	25	1	1	P33897		0	8.2275e+07	0	0.0001275	47.88	0.00655384	2	1205.59	-0.256478	51.8498	0	C1203	44.44	B1503	3.9	B1503	0.03
High	FVNDIFERI	176	14	14	P33778;P62807;P58876;Q93079;P06899;O60814;Q99880;Q99879;Q99877;P23527;Q16778;Q5QNW6;Q8N257;P57053		0	3270545371	0	0.0001928	47.87	0.0063142	2	1152.6	-0.155685	77.1313	0	C1203	37.04	A6802	12	A6802	0.1
High	VKTGTITTF	49	1	1	P13639		0	7.46969e+08	0	1.037e-05	47.84	0.00287436	2	967.545	-0.594923	42.7479	0	C1203	44.44	B1503	6.1	B1503	0.08
High	KAITFVTQY	31	1	1	Q9H0S4		0	6.98575e+07	0	0.001401	47.69	0.00551925	2	1070.59	-0.608411	54.5179	0	C1203	77.78	B1503	10	B1503	0.2
High	RKFPAGKVPAF	69	1	1	P26641		0	2.78024e+08	0	0.0001823	47.63	0.00284246	3	1217.71	-0.513216	39.6223	0		0	B1503	24	B1503	0.6
High	AAYGELRAM	15	1	1	Q9UL46		0	3.33931e+07	0	1.02e-05	47.62	0.0052301	2	981.482	-0.30577	45.4399	0	C1203	81.48	C1203	15.4	C1203	0.05
High	GKVTSIMQF	13	1	1	Q14562		0	2.75428e+07	0	6.31e-06	47.52	0.00598031	2	1010.53	-0.481365	57.6268	0	C1203	33.33	B1503	13.5	B1503	0.3
High	DTFSGIGKKFGL	14	1	1	Q15847		0	2.84376e+07	0	2.272e-06	47.51	0.00553813	2	1269.68	-0.149605	67.9273	0		0	A6802	198.2	A6802	1.2
High	YSIDLSERV	10	1	1	Q6NTF9		0	1.21323e+07	0	0.0001133	47.48	0.00646798	2	1081.55	-0.597187	58.1577	0	C1203	74.07	A6802	19.6	A6802	0.17
High	KKKSKVSSY	1	1	1	Q92620		0	651723	0	0.001038	47.42	0.00267807	2	1054.63	-0.477612	15.8458	0	C1203	44.44	B1503	27.6	B1503	0.7
High	SSYDKPITF	20	1	1	Q86X10		0	5.30616e+07	0	0.0002012	47.14	0.00677251	2	1057.52	-0.936846	52.3397	0	C1203	77.78	C1203	10.8	C1203	0.03
High	KKLPKGTVSF	4	1	1	O75534		0	1.79234e+07	0	4.111e-07	47.12	0.00148381	2	1104.68	-0.287512	27.6817	0	C1203	34.29	B1503	16.6	B1503	0.4
High	RLWEQLVHF	22	1	1	Q5JS54		0	5.60797e+07	0	0.0004643	47.11	0.00805087	2	1227.66	-0.177381	70.1267	0	C1203	37.04	B1503	12.6	B1503	0.3
High	SSVPGVRLL	18	1	1	P08670		0	4.09001e+07	0	0.0006922	47.1	0.00404398	2	927.562	-0.261996	56.3247	0	C1203	81.48	C1203	48.5	C1203	0.25
High	GKPPFEANTY	26	1	1	O14965		0	1.38558e+08	0	0.001182	47.08	0.0080342	2	1123.54	-0.737024	42.7137	0	C1203	31.43	B1503	372	B1503	4.5
High	NVAEIVIHI	24	1	1	Q9BZD4		0	5.21099e+07	0	0.0008082	47	0.00336501	2	1007.59	-0.509212	69.6819	0	C1203	44.44	A6802	5.1	A6802	0.02
High	AAAPVIKAY	2	1	1	Q8IW45		0	5.09296e+07	0	5.817e-07	46.85	0.00649356	2	903.529	-0.583076	41.7341	0	C1203	96.3	B1503	17.9	C1203	0.15
High	GKIQFGYVY	29	1	1	Q969M3		0	7.85497e+07	0	1.687e-07	46.78	0.00857837	2	1074.56	-0.402335	59.3463	0	C1203	40.74	B1503	8.1	B1503	0.15
High	GQEGKYRVY	1	1	1	Q12830		0	5.03979e+06	0	0.001018	46.7	0.00743797	2	1099.55	-1.07664	27.4042	0	C1203	48.15	B1503	19.7	B1503	0.5
High	ITVSIIKEL	27	1	1	Q8TED0		0	8.87768e+07	0	0.001076	46.69	0.00125145	2	1015.64	-0.423811	68.5445	0	C1203	81.48	C1203	140.7	C1203	0.7
High	FAYPAIRYL	77	1	1	P51398		0	4.28365e+08	0	9.463e-05	46.69	0.00500151	2	1113.61	0.00642786	72.5036	0	C1203	96.3	C1203	2.4	C1203	0.01
High	SAFPFPVTV	14	1	1	Q96K37		0	1.14712e+08	0	0.0007345	46.63	0.0105278	2	964.514	-0.30471	90.6096	0	C1203	96.3	C1203	5.4	C1203	0.01
High	TTVEIFNKL	80	1	1	Q96QK1		0	9.98543e+08	0	0.001136	46.53	0.00486571	2	1064.6	-1.14747	62.4269	0	C1203	70.37	A6802	8.9	A6802	0.06
High	KKVGIVGKY	3	1	1	P61513		0	3.13714e+07	0	0.0002859	46.46	0.000683479	2	991.629	-0.852517	23.1835	0	C1203	44.44	B1503	46.2	B1503	1.1
High	SVSAVIVRA	11	1	1	Q68CR1		0	6.10791e+07	0	0.00134	46.4	0.0057707	2	901.546	-0.512629	40.7396	0	C1203	11.11	A6802	59.7	A6802	0.6
High	AQEDAQRLY	2	1	1	P20073		0	7.51042e+06	0	1.394e-06	46.29	0.00863843	2	1093.53	-0.140913	34.9285	0	C1203	48.15	B1503	24.7	B1503	0.6
High	YSFGHPSSV	43	1	1	P31327		0	2.84017e+08	0	4.153e-05	46.27	0.00713927	2	980.447	-0.735923	42.3836	0	C1203	81.48	C1203	2.9	C1203	0.01
High	KKFFGEFTGF	27	1	1	Q15029		0	6.99597e+07	0	0.0001178	46.27	0.00891081	2	1207.61	-0.816685	63.0108	0	C1203	42.86	B1503	16.3	B1503	0.4
High	VKVIQQESY	23	1	1	P60228		0	8.98411e+07	0	2.229e-06	46.26	0.00825588	2	1093.59	0.0763415	37.2677	0	C1203	40.74	B1503	88.8	B1503	1.7
High	GKLPAGGVLY	19	1	1	P48634		0	6.02454e+07	0	0.000556	46.21	0.00751022	2	974.566	-0.739361	50.2921	0	C1203	34.29	B1503	41.8	B1503	1
High	AAMPRPVSY	26	1	1	Q6TFL4		0	6.19485e+07	0	0.0001255	46.18	0.00909257	2	991.503	-0.403655	42.47	0	C1203	92.59	B1503	7.3	C1203	0.04
High	VGVDFALKV	3	1	1	O14966		0	1.72149e+07	0	0.0002653	46.09	0.00641049	2	947.556	-0.282377	68.7363	0	C1203	48.15	C1203	506	C1203	1.7
High	FMVSQVLF	6	1	1	P46597		0	2.58006e+07	0	0.0006689	46.08	0.00782598	2	970.506	-0.378236	96.5468	0	C1203	36.67	B1503	43.4	B1503	1
High	ETFKDFPQm	50	2	2	P15170;Q8IYD1	M9(Oxidation)	0	132306241	0	7.38e-05	45.99	0.00535384	2	1158.51	-0.674415	48.041	0	C1203	62.96	A6802	240.4	A6802	1.4
High	KSMFQRTTY	2	1	1	Q9Y262		0	6.21912e+06	0	0.0001217	45.93	0.00984832	2	1161.57	-0.587625	32.5006	0	C1203	70.37	B1503	18.9	B1503	0.5
High	RKIPVPANRY	15	1	1	Q9NRX1		0	1.03489e+08	0	0.0005513	45.89	0.00499033	3	1213.72	-0.0391514	28.7774	0	C1203	31.43	B1503	52	B1503	1.2
High	DVVNILVYV	11	1	1	Q15652		0	1.43887e+07	0	0.0002532	45.87	0.0063023	2	1033.59	-0.0389551	103.651	0	C1203	40.74	A6802	4.7	A6802	0.01
High	EVFPDQFIHL	62	1	1	P07686		0	3.80078e+08	0	8.512e-06	45.85	0.011351	2	1244.63	0.178273	84.1044	0	C1203	40	A6802	43.9	A6802	0.4
High	MVAPVWYLV	14	1	1	Q96HY6		0	2.03258e+07	0	0.001291	45.82	0.00904059	2	1077.58	-0.296699	101.314	0	C1203	48.15	A6802	2	A6802	0.01
High	STFIGEHYV	25	1	1	P08581		0	4.90618e+07	0	1.854e-05	45.79	0.0112466	2	1052.5	-0.303248	54.0106	0	C1203	70.37	A6802	6	A6802	0.03
High	SQYGSQVGY	20	1	1	Q14147		0	2.42897e+07	0	4.161e-05	45.76	0.00491235	2	988.436	-1.17524	44.3275	0	C1203	48.15	B1503	3.5	B1503	0.02
High	SAYAQIVQF	25	1	1	Q9Y4W6		0	6.56026e+07	0	0.001011	45.73	0.0110021	2	1026.53	-0.0614464	74.838	0	C1203	77.78	B1503	9	C1203	0.09
High	KSKDFVQVm	122	1	1	P78527	M9(Oxidation)	0	54986011	0	1.113e-05	45.73	0.00933815	2	1097.57	-0.268661	28.2821	0	C1203	70.37	B1503	67.8	C1203	0.4
High	NAFASVILF	25	1	1	P26641		0	7.72841e+07	0	0.0009679	45.72	0.00869658	2	981.54	-0.610041	96.5383	0	C1203	77.78	B1503	16.9	C1203	0.2
High	QAFPLIIKL	17	1	1	Q14CZ7		0	4.57714e+07	0	0.00104	45.71	0.00207577	2	1042.67	-0.858031	82.2236	0	C1203	92.59	C1203	130.7	C1203	0.6
High	FAISILQQI	21	1	1	P60842		0	6.29209e+07	0	0.001079	45.57	0.00597512	2	1032.61	-0.0378196	95.8723	0	C1203	74.07	C1203	8.3	C1203	0.01
High	DASPVTNNTI	9	1	1	O15164		0	4.13657e+07	0	0.001364	45.55	0.0104062	2	1031.5	-1.07234	49.1487	0	C1203	45.71	A6802	308.3	A6802	1.6
High	QAIGAIRTL	16	1	1	Q9H7E9		0	3.66644e+07	0	0.0008439	45.52	0.00622385	2	942.573	-0.490005	47.7677	0	C1203	88.89	C1203	71.9	C1203	0.4
High	EVFRIGNVEI	17	1	1	P15927		0	2.8973e+07	0	6.549e-05	45.46	0.0109896	2	1175.64	-0.473171	77.1889	0	C1203	20	A6802	27.3	A6802	0.25
High	MAAAWPLLL	13	1	1	P15151		0	6.65552e+07	0	7.25e-05	45.41	0.00883217	2	985.554	-0.184392	102.348	0	C1203	85.19	C1203	7.1	C1203	0.01
High	VTYVPVTTF	25	1	1	P62899		0	6.27656e+07	0	0.0001087	45.35	0.00809003	2	1026.55	-0.302696	76.5583	0	C1203	74.07	B1503	14.3	C1203	0.3
High	EVYGSLPAFL	41	1	1	Q01650		0	6.65401e+08	0	0.0003851	45.28	0.0105859	2	1095.57	-0.613897	92.8872	0	C1203	40	A6802	19	A6802	0.17
High	FLYPFPLAL	8	1	1	Q5BJD5		0	6.61112e+07	0	0.001227	45.22	0.00609632	2	1080.61	-0.367332	107.327	0	C1203	59.26	C1203	4.7	C1203	0.01
High	EVFDKTYQF	28	1	1	Q96EU6		0	1.51104e+08	0	3.992e-05	45.12	0.0111539	2	1176.56	-0.74734	60.0519	0	C1203	37.04	A6802	307.5	A6802	1.6
High	SAVNIIRTF	10	1	1	P29728		0	1.37066e+07	0	0.0004895	45.05	0.00715716	2	1020.58	-1.41032	59.6457	0	C1203	77.78	B1503	18.8	C1203	0.1
High	TTIDVRTTF	17	1	1	Q8IY21		0	62245581	0	0.0001496	45.01	0.0100708	2	1053.56	-0.462116	54.7407	0	C1203	66.67	C1203	46.1	C1203	0.25
High	TTFEHAHNm	2	1	1	P13639	M9(Oxidation)	0	7.6281e+06	0	1.26e-05	44.88	0.00324437	2	1103.46	-0.940502	18.8124	0	C1203	66.67	C1203	25.6	C1203	0.1
High	DTFFRPLNV	31	1	1	Q13444		0	1.01756e+08	0	0.001361	44.87	0.0121439	2	1108.58	-0.404754	73.3519	0	C1203	77.78	A6802	19.7	A6802	0.17
High	KLFIGGLSF	10	4	4	Q32P51;P09651;P22626;P51991		0	3.10964e+07	0	0.001212	44.84	0.00535616	2	981.576	-0.374587	80.924	0	C1203	37.04	B1503	3.8	B1503	0.03
High	AKYPHVEDY	27	1	1	P61289		0	1.16624e+08	0	8.793e-08	44.78	0.01154	2	1121.53	-0.262852	33.8676	0	C1203	55.56	B1503	8.3	B1503	0.15
High	SAISSVRLY	26	1	1	P42285		0	4.08655e+07	0	0.001036	44.74	0.0090582	2	995.552	-0.246987	54.0204	0	C1203	85.19	B1503	19.6	C1203	0.09
High	SAYDNVNKV	4	1	1	P28482		0	1.64866e+07	0	0.000858	44.59	0.0125478	2	1009.49	-0.615165	32.1815	0	C1203	85.19	C1203	11.1	C1203	0.03
High	AKQPHVGDY	1	1	1	Q06323		0	4.22889e+06	0	0.0001356	44.59	0.0116477	2	1014.5	0.00145346	24.6813	0	C1203	51.85	B1503	36.4	B1503	0.9
High	SQFGTVTRF	38	1	1	Q9BYG3		0	6.81359e+08	0	0.0002475	44.59	0.0126277	2	1042.53	-0.700135	50.0836	0	C1203	40.74	B1503	2.5	B1503	0.01
High	GQFASDVQF	9	1	1	Q02833		0	18644372	0	7.703e-05	44.58	0.0102463	2	998.458	0.163328	66.778	0	C1203	37.04	B1503	3.7	B1503	0.03
High	KHQEHILRF	24	1	1	Q13263		0	1.2558e+08	0	0.0004333	44.53	0.00937659	3	1207.67	-0.120583	24.5907	0	C1203	40.74	B1503	53.8	B1503	1.2
High	EIIDFFLGA	52	1	1	P15880		0	2.18891e+08	0	0.0008399	44.51	0.0118855	2	1024.53	-0.0698774	104.678	0	C1203	7.41	A6802	8.1	A6802	0.05
High	KAFQKIVVL	72	2	2	Q7L1Q6;Q9Y6E2		0	2.26762e+09	0	9.509e-05	44.5	0.00106621	2	1045.68	-0.422788	47.377	0	C1203	88.89	C1203	36.9	C1203	0.17
High	AQVWMITRY	5	1	1	Q9BVK8		0	8.52052e+06	0	2.606e-07	44.41	0.0123398	2	1167.6	-0.229061	64.7359	0	C1203	44.44	B1503	5.7	B1503	0.07
High	HVVDFFNRV	35	1	1	Q96BX8		0	7.75668e+07	0	0.001028	44.38	0.0165379	2	1132.59	-0.287979	55.6762	0	C1203	40.74	A6802	4.3	A6802	0.01
High	YQFTGIKKY	27	1	1	Q96IX5		0	2.21135e+08	0	3.067e-06	44.38	0.0154382	2	1147.61	-1.56911	41.9345	0	C1203	51.85	B1503	2.6	B1503	0.01
High	GKYFGGVLEY	24	1	1	O94955		0	7.39837e+07	0	0.0004987	44.22	0.0155824	2	1132.57	-0.702282	64.5777	0	C1203	40	B1503	16.5	B1503	0.4
High	LANGEVRIY	2	1	1	Q8NFJ9		0	2.52885e+07	0	1.219e-05	44.16	0.0148264	2	1034.56	-0.517873	47.1061	0	C1203	85.19	B1503	69.1	C1203	0.7
High	GKAPLNVQF	23	1	1	O75369		0	5.00297e+07	0	0.001028	44.1	0.0157661	2	973.546	-0.412023	53.4805	0	C1203	44.44	B1503	34.9	B1503	0.9
High	LAFPGEMLL	22	1	1	P43007		0	4.28131e+07	0	0.001014	44.01	0.0180424	2	990.532	-0.540183	96.8939	0	C1203	85.19	C1203	18.4	C1203	0.07
High	AAAELIKEV	17	1	1	Q13425		0	2.20566e+07	0	0.0008584	43.99	0.0126132	2	943.546	-0.178443	48.1062	0	C1203	96.3	C1203	115.6	C1203	0.6
High	GQYSTGKTSF	4	1	1	Q9NZN4		0	3.17033e+07	0	0.0001884	43.94	0.0150358	2	1075.51	-0.294511	33.3777	0	C1203	34.29	B1503	3.8	B1503	0.03
High	AMNPTNTVF	47	1	1	P11142		0	3.91745e+08	0	0.001217	43.92	0.0151559	2	994.466	-0.118871	61.2402	0	C1203	44.44	B1503	2.8	B1503	0.01
High	GQAPPGKAL	9	1	1	A8MPP1		0	7.16973e+07	0	0.0009525	43.87	0.00952699	2	838.478	-0.345224	25.2066	0	C1203	51.85	B1503	25.1	B1503	0.7
High	STADVIQHC	13	1	1	Q5SRE5		0	3.80615e+07	0	0.001128	43.83	0.0094247	2	973.441	-0.259881	35.6552	0	C1203	40.74	A6802	182.6	A6802	1.2
High	YVSEILEKV	11	1	1	P42704		0	2.08522e+07	0	0.001033	43.83	0.0088865	2	1079.6	-0.703523	61.0798	0	C1203	48.15	A6802	6.8	A6802	0.04
High	NTTDIFQTV	66	1	1	P37802		0	2.90924e+09	0	0.001196	43.79	0.0148225	2	1038.51	-0.539375	71.1717	0	C1203	74.07	A6802	4	A6802	0.01
High	SKKIDRHMY	6	1	1	P84098		0	1.90108e+08	0	1.219e-06	43.78	0.0157697	2	1177.61	-0.422854	19.3831	0	C1203	37.04	B1503	311.3	B1503	4
High	RAIDFSPYL	26	1	1	P17676		0	7.13499e+07	0	8.12e-05	43.74	0.0161586	2	1081.57	-0.37257	69.5665	0	C1203	77.78	C1203	21.2	C1203	0.08
High	AQVPFEQIL	35	1	1	Q99828		0	3.91453e+08	0	0.001124	43.7	0.0222589	2	1044.57	0.082392	83.8577	0	C1203	48.15	B1503	26.9	B1503	0.7
High	VKNPDGGSY	5	1	1	Q15646		0	1.7619e+07	0	0.0006056	43.61	0.0175794	2	936.442	-0.244724	24.8607	0	C1203	48.15	B1503	21.6	B1503	0.6
High	EAAFFEGHFL	16	1	1	Q5W0V3		0	2.67804e+07	0	1.51e-05	43.4	0.0168757	2	1167.55	0.0457104	75.6142	0	C1203	60	A6802	27.9	A6802	0.3
High	KLVDFVIHF	18	1	1	P59998		0	2.71802e+07	0	1.195e-07	43.36	0.0110001	2	1117.64	0.162216	74.7305	0	C1203	40.74	B1503	15.8	B1503	0.4
High	TTISKVSQV	4	1	1	Q9UNX4		0	2.5089e+07	0	0.001143	43.33	0.00686786	2	962.55	-1.30763	32.2573	0	C1203	74.07	A6802	10.2	A6802	0.08
High	RAALPLQLL	1	2	2	Q8NF91;Q8WXH0		0	3.90838e+06	0	0.001165	43.29	0.0014041	2	994.641	-0.0368283	73.28	0	C1203	77.78	C1203	186.5	C1203	0.8
High	YAIDNPLHY	21	1	1	A5YKK6		0	3.68962e+07	0	5.244e-08	43.19	0.0180044	2	1105.53	-0.334601	61.3938	0	C1203	88.89	C1203	10.7	C1203	0.03
High	GKVKSGGTY	3	1	1	P55017		0	3.52427e+07	0	0.0009672	43.16	0.014028	2	896.483	-0.558225	16.7515	0	C1203	40.74	B1503	21.1	B1503	0.6
High	VmAPRTLIL	58	8	8	P04222;P30504;Q9TNN7;Q29963;P30505;P30508;P30510;Q29960	M2(Oxidation)	0	2.76801e+08	0	0.0004912	43.1	0.00879888	2	1029.61	-0.45469	58.2692	0	C1203	55.56	B1503	16.1	B1503	0.4
High	YSYFSPRTM	13	1	1	Q15003		0	1.97887e+07	0	2.042e-05	43.06	0.0132352	2	1151.52	-0.160547	54.3991	0	C1203	77.78	C1203	3.6	C1203	0.01
High	EVYAGNFVEV	15	1	1	Q9UBS4		0	2.61283e+07	0	0.001304	42.91	0.0204519	2	1126.54	-0.33377	73.1939	0	C1203	31.43	A6802	6	A6802	0.03
High	GKVGSQSSF	1	1	1	Q9BY84		0	5.83541e+06	0	0.001355	42.86	0.0179894	2	896.447	-0.214421	24.9199	0	C1203	33.33	B1503	14.6	B1503	0.4
High	FSMYKPITY	15	1	1	Q68CL5		0	2.48585e+07	0	0.001001	42.82	0.020875	2	1149.56	-0.365857	62.2631	0	C1203	81.48	C1203	5.1	C1203	0.01
High	GKVGAHAGEY	2	1	1	P69905		0	3.46833e+06	0	0.0009979	42.79	0.0196888	2	988.484	-0.662542	20.1296	0	C1203	31.43	B1503	121.5	B1503	2.5
High	KAYFDVKEY	18	1	1	Q9UJX2		0	3.43622e+07	0	4.256e-06	42.63	0.0235331	2	1162.58	-0.632443	44.9342	0	C1203	88.89	B1503	16.5	C1203	0.25
High	FKNIQPSSF	12	1	1	Q9BVQ7		0	1.78491e+07	0	4.096e-05	42.62	0.0213911	2	1067.55	-0.582735	49.1249	0	C1203	37.04	B1503	6.1	B1503	0.08
High	TTIEAIHGL	53	1	1	Q92905		0	2.35335e+08	0	0.0001256	42.54	0.0151387	2	954.525	-0.396272	52.6734	0	C1203	74.07	A6802	4.6	A6802	0.01
High	SAYEIIRDY	23	1	1	O60287		0	7.43641e+07	0	0.001056	42.47	0.01949	2	1129.55	-0.0226082	57.5548	0	C1203	88.89	C1203	16.7	C1203	0.06
High	KLYQSIIGY	18	1	1	Q9NSV4		0	4.28859e+07	0	0.0008848	42.34	0.0169637	2	1084.6	-1.06457	59.51	0	C1203	48.15	B1503	7.6	B1503	0.12
High	GKYLELLGY	14	1	1	O94979		0	2.17341e+07	0	6.157e-05	42.33	0.0181139	2	1055.58	-1.39271	71.4279	0	C1203	44.44	B1503	29.9	B1503	0.8
High	ETADVIAKVAF	7	1	1	O43617		0	1.08323e+07	0	3.621e-07	42.25	0.0209882	2	1163.63	-0.058839	66.1757	0		0	A6802	436	A6802	2
High	RKLFIGGLSF	27	4	4	Q32P51;P09651;P22626;P51991		0	8.81386e+07	0	0.001174	42.19	0.00575261	2	1137.68	-0.363431	66.0316	0	C1203	37.14	B1503	6	B1503	0.08
High	YAFPKSITV	47	1	1	P53985		0	555993886	0	0.0009971	42.17	0.0173709	2	1025.57	-0.063751	61.9245	0	C1203	96.3	C1203	2.7	C1203	0.01
High	RVYPQAVYF	29	1	1	Q9Y4A5		0	1.98332e+08	0	0.0004993	42.17	0.017116	2	1142.6	-0.249149	59.2064	0	C1203	44.44	B1503	7.1	C1203	0.09
High	AMASIINRL	16	1	1	Q96N67		0	2.0946e+07	0	0.00123	42.14	0.0158784	2	988.56	-0.588737	60.1345	0	C1203	51.85	B1503	126.7	C1203	1.8
High	AKVANASYY	4	1	1	O15042		0	1.81509e+07	0	0.0001481	42.09	0.0249061	2	986.494	-0.312472	31.3722	0	C1203	40.74	B1503	13.4	B1503	0.3
High	RVFPYSVFY	51	1	1	O15118		0	318888509	0	1.147e-05	42	0.0234243	2	1177.6	-0.128961	76.2518	0	C1203	51.85	B1503	7.9	C1203	0.09
High	NKYLTAEAF	7	1	1	Q16658		0	4.44487e+07	0	0.001325	41.94	0.0246426	2	1056.54	-0.127804	51.7752	0	C1203	33.33	B1503	15	B1503	0.4
High	EVSPVSFHQV	60	1	1	Q8N543		0	8.58162e+08	0	7.641e-05	41.76	0.0257087	2	1128.57	-0.354907	50.8662	0	C1203	25.71	A6802	5.5	A6802	0.03
High	KKYGVDLIRY	13	1	1	Q6UXN9		0	1.93153e+07	0	0.001378	41.7	0.012805	3	1254.72	-0.314312	43.4815	0	C1203	34.29	B1503	23.2	B1503	0.6
High	KLFLTGESY	18	1	1	P10619		0	1.93922e+07	0	0.0002507	41.68	0.0239521	2	1057.56	-0.256589	56.032	0	C1203	40.74	B1503	6.4	B1503	0.09
High	EVLDILTRL	14	1	1	O75955		0	4.22455e+07	0	0.001262	41.59	0.0143019	2	1071.64	-0.4319	84.6439	0	C1203	40.74	A6802	40.6	A6802	0.4
High	GKFPSLLTH	51	1	1	P62906		0	6.68232e+08	0	0.0006155	41.54	0.0210402	2	999.562	-0.660553	46.2301	0	C1203	18.52	B1503	112.8	B1503	2
High	FKFMPPPTY	70	1	1	Q9H3M7		0	1.6655e+08	0	6.198e-06	41.46	0.0238285	2	1127.56	0.138894	64.9557	0	C1203	51.85	B1503	3.4	B1503	0.02
High	RKPDQVFQSY	11	1	1	Q96K76		0	2.17192e+07	0	0.001216	41.24	0.0295801	2	1267.64	-0.874062	37.2014	0	C1203	40	B1503	132.6	B1503	2.5
High	AKVDLNSNGF	6	1	1	P13797		0	1.67433e+07	0	0.000676	41.17	0.033055	2	1064.54	-0.91203	45.3542	0	C1203	37.14	B1503	137.4	B1503	2.5
High	YASENVNKL	3	2	2	P62820;Q9H0U4		0	2.11092e+07	0	0.001044	41.15	0.029436	2	1037.53	-0.882047	34.0855	0	C1203	88.89	C1203	14.1	C1203	0.04
High	VmAPRTLVL	170	9	9	P01892;P30447;P05534;P18462;P30450;P30456;P30457;P01891;P10316	M2(Oxidation)	0	6.2637e+08	0	0.001335	41.11	0.0155009	2	1015.6	-0.616643	53.8656	0	C1203	59.26	B1503	10.1	B1503	0.2
High	DTTYINHVV	56	1	1	Q9UBR2		0	1.06138e+09	0	0.0005412	41.1	0.0420998	2	1061.52	-1.19767	50.3284	0	C1203	70.37	A6802	8.7	A6802	0.06
High	SSYLFIVKY	16	1	1	Q96QD8		0	4.83373e+07	0	0.000247	40.97	0.0292699	2	1119.61	-0.694605	72.2311	0	C1203	77.78	B1503	81	C1203	1
High	YKAPITNEF	9	1	1	Q9Y4X0		0	19375284	0	3.26e-05	40.92	0.0339618	2	1082.55	-0.598873	51.4868	0	C1203	48.15	B1503	7.7	B1503	0.15
High	RHWGGQADF	1	1	1	Q6PJG6		0	1.46926e+07	0	0.0001549	40.89	0.020502	2	1073.49	-0.515249	34.4276	0	C1203	33.33	B1503	56.4	B1503	1.3
High	YVTDVLYRV	19	1	1	Q96Q15		0	1.30753e+08	0	0.0001344	40.87	0.0273695	2	1127.61	-0.77254	65.4086	0	C1203	44.44	A6802	5	A6802	0.02
High	SAYARLIDY	23	1	1	P34897		0	6.36581e+07	0	0.0005846	40.71	0.0341328	2	1071.55	-0.491796	58.1849	0	C1203	81.48	B1503	12.7	C1203	0.05
High	AQIKFLNTY	14	1	1	Q8ND90		0	1.7045e+07	0	9.21e-05	40.63	0.0268875	2	1097.6	-0.403571	58.6133	0	C1203	44.44	B1503	2.9	B1503	0.01
High	RKKQSDVMRF	4	1	1	P61313		0	2.46059e+07	0	7.447e-08	40.63	0.025988	3	1294.7	-0.182489	22.6354	0	C1203	28.57	B1503	101.3	B1503	1.9
High	RQADFVQVL	20	1	1	Q9Y2V7		0	1.26605e+08	0	0.001066	40.58	0.0308038	2	1075.59	0.230551	57.8729	0	C1203	51.85	B1503	4.2	B1503	0.03
High	FAAFFSHIL	2	1	1	Q86XA9		0	1.36564e+07	0	5.694e-05	40.57	0.0231046	2	1052.56	-0.442255	83.6886	0	C1203	81.48	C1203	10.1	C1203	0.03
High	YKVEYPIMY	19	1	1	O14880		0	4.93565e+07	0	6.686e-06	40.49	0.0356876	2	1205.59	-0.623487	65.7991	0	C1203	51.85	B1503	7.7	B1503	0.12
High	IKISNPTEF	16	1	1	Q9BXS6		0	6.43314e+07	0	0.001117	40.42	0.0394357	2	1048.57	-1.00091	54.5267	0	C1203	40.74	B1503	5	B1503	0.05
High	AKYPEIKSL	10	1	1	O15121		0	148237866	0	4.008e-05	40.38	0.0233545	2	1048.6	-1.70226	40.6546	0	C1203	59.26	B1503	83	B1503	1.7
High	FASHVSPEV	46	1	1	Q9NP61		0	4.86011e+08	0	0.001287	40.28	0.0354211	2	972.478	-1.00222	38.9424	0	C1203	85.19	C1203	13.7	C1203	0.04
High	QKYAGKDGY	3	1	1	P31949		0	8.64508e+06	0	0.001357	40.13	0.0349723	2	1029.5	-0.439031	20.6816	0	C1203	40.74	B1503	78.4	B1503	1.6
High	YAYDGKDYIA	36	16	16	P01892;P30447;P05534;P10316;P01889;P30460;Q04826;P30479;P30480;P30486;P18464;P30490;P30498;Q31610;P30499;P04222		0	2.25832e+08	0	0.0003196	40.1	0.0269669	2	1178.54	-0.33343	50.1739	0	C1203	45.71	A6802	498.4	C1203	2
High	SAIDRIFTL	29	1	1	Q86TU7		0	1.14335e+08	0	0.001355	40.07	0.0271587	2	1035.58	-0.305035	75.9202	0	C1203	85.19	C1203	10.1	C1203	0.03
High	YGFPSPIFL	2	1	1	Q76EJ3		0	1.28062e+07	0	0.0006656	40.07	0.0327971	2	1040.54	-1.14208	100.683	0	C1203	59.26	C1203	13.8	C1203	0.04
High	AKVVDKSEY	3	1	1	P42695		0	1.3143e+07	0	0.001299	39.99	0.0285707	2	1038.55	-1.13962	22.1796	0	C1203	44.44	B1503	98.5	B1503	1.8
High	FISEIIHQL	2	1	1	Q9C040		0	1.14293e+07	0	3.491e-05	39.91	0.0353704	2	1099.61	-0.212637	74.6064	0	C1203	51.85	A6802	10	C1203	0.06
High	SAADGPRVF	3	1	1	Q9Y285		0	6.51473e+06	0	0.0003881	39.88	0.0448318	2	919.462	-0.948807	39.8742	0	C1203	85.19	B1503	36.3	C1203	0.25
High	TTFESSHYL	15	1	1	Q16531		0	3.60752e+07	0	9.949e-05	39.83	0.0326535	2	1084.49	0.0877874	47.5096	0	C1203	74.07	A6802	4.6	A6802	0.01
High	YKILGGSVL	20	1	1	Q15843		0	4.5366e+07	0	0.0005743	39.77	0.011303	2	949.572	-0.0299375	62.1801	0	C1203	44.44	B1503	12.1	B1503	0.3
High	YAFAHILTV	17	1	1	O75204		0	4.17049e+07	0	9.034e-05	39.65	0.0417203	2	1034.57	-0.736146	71.193	0	C1203	92.59	C1203	2.4	C1203	0.01
High	SVYEGGVFFL	2	3	3	P51965;Q96LR5;Q969T4		0	3.83103e+07	0	0.0006773	39.64	0.0436471	2	1117.56	0.185157	95.8488	0	C1203	37.14	A6802	57.9	A6802	0.5
High	YTFESTIIY	4	1	1	Q4LDE5		0	2.74087e+07	0	0.001036	39.6	0.0387989	2	1136.55	-0.607745	80.586	0	C1203	81.48	C1203	6.8	C1203	0.01
High	NAFSGVMmL	40	1	1	Q9NTX5	M8(Oxidation)	0	6.0053e+07	0	0.001002	39.48	0.0259988	2	985.447	-0.792539	78.139	0	C1203	85.19	C1203	22.4	C1203	0.09
High	RQFMAETQF	11	1	1	Q14444		0	2.93157e+07	0	0.0007117	39.48	0.0301187	2	1157.54	-0.669211	51.9698	0	C1203	33.33	B1503	2.3	B1503	0.01
High	YLYGQTTTY	17	1	1	P11388		0	4.09882e+07	0	9.416e-05	39.47	0.036628	2	1109.51	-0.349102	56.7576	0	C1203	51.85	B1503	3	B1503	0.01
High	ISTPVIRTF	6	1	1	Q9NZB2		0	1.57924e+08	0	0.0003983	39.46	0.0234463	2	1033.6	-1.11109	58.393	0	C1203	77.78	B1503	37.8	C1203	0.25
High	YNFEKPVVM	19	1	1	O43929		0	3.05655e+07	0	0.0007755	39.31	0.0438929	2	1126.56	0.141167	58.6367	0	C1203	51.85	B1503	28	C1203	0.15
High	KKHSQFIGY	12	4	4	Q58FF7;Q58FG0;P07900;P08238		0	5.59742e+08	0	0.001078	39.2	0.0386829	2	1107.59	-1.14842	26.2343	0	C1203	44.44	B1503	11.3	B1503	0.25
High	VKVDLSEKY	10	1	1	P43243		0	1.69465e+07	0	0.001234	39.11	0.0270466	2	1080.59	-0.825782	39.8853	0	C1203	44.44	B1503	104.6	B1503	1.9
High	NTATIFHEL	50	1	1	Q9UHD2		0	6.36215e+08	0	0.001082	39.09	0.0626232	2	1045.53	-0.956705	57.9836	0	C1203	74.07	A6802	3.8	A6802	0.01
High	SGYYRVSSY	10	1	1	Q9UNQ0		0	2.90637e+07	0	0.001375	39.05	0.0392395	2	1081.49	-1.2237	40.7866	0	C1203	44.44	C1203	23	C1203	0.09
High	RQQPPSTTTF	4	1	1	A3KN83		0	3.02046e+07	0	8.247e-06	39.05	0.0511807	2	1162.58	-0.332797	33.9738	0	C1203	37.14	B1503	4.8	B1503	0.05
High	GKAFFLSSY	17	1	1	O75123		0	2.51689e+07	0	0.0005088	38.83	0.0639535	2	1019.52	-0.0504317	62.113	0	C1203	40.74	B1503	7.4	B1503	0.12
High	YMIDPSGVSY	20	1	1	P25788		0	8.87055e+07	0	4.891e-05	38.81	0.026265	2	1131.5	0.334119	71.6084	0	C1203	48.57	B1503	5	B1503	0.05
High	VTTDIQVKV	45	1	1	O00267		0	2.36998e+08	0	0.001074	38.74	0.029913	2	1002.58	-0.462974	48.0504	0	C1203	77.78	A6802	34.4	A6802	0.4
High	DTFVHVTDL	28	1	1	P62263		0	6.1472e+07	0	0.001176	38.64	0.068024	2	1046.52	-0.150005	66.3183	0	C1203	74.07	A6802	288.5	A6802	1.6
High	GKLKPTMAF	21	1	1	Q6YN16		0	3.79384e+07	0	0.001024	38.62	0.0273847	2	992.559	-0.748273	38.0501	0	C1203	29.63	B1503	7.2	B1503	0.12
High	WAYPRQVFI	9	1	1	Q9P2D0		0	4.11705e+07	0	9.917e-05	38.62	0.0480228	2	1179.63	0.454401	71.2693	0	C1203	81.48	C1203	7.8	C1203	0.01
High	AVTKIIAKV	16	1	1	P49419		0	1.66157e+07	0	0.0009714	38.53	0.00486075	2	942.634	-0.248545	33.4516	0	C1203	44.44	A6802	157.5	A6802	1.1
High	RQYAKDIGF	19	1	1	P62273		0	5.96725e+07	0	0.0006439	38.53	0.0461105	2	1097.57	-1.0768	38.999	0	C1203	37.04	B1503	2.6	B1503	0.01
High	FSYAFPKAV	2	2	2	O60669;O15427		0	9.38633e+06	0	3.993e-05	38.43	0.0531275	2	1029.54	-0.0976146	62.6943	0	C1203	81.48	C1203	3.4	C1203	0.01
High	GKIADRFLLY	6	1	1	P61968		0	1.37332e+07	0	2.924e-05	38.43	0.0270303	2	1195.68	-0.122242	58.2789	0	C1203	31.43	B1503	44.7	B1503	1.1
High	KAFGWPSSL	6	1	1	Q9HAH1		0	3.09677e+07	0	0.001201	38.34	0.0614358	2	992.52	0.0875198	64.4364	0	C1203	85.19	C1203	8.6	C1203	0.01
High	MPAFIFEHI	23	1	1	O00560		0	8.27394e+07	0	0.001011	38.12	0.0672181	2	1104.55	-0.6506	81.7211	0	C1203	33.33	A6802	21.7	A6802	0.2
High	KHFGTILNY	27	2	2	Q13829;Q9H3F6		0	9.14317e+07	0	0.0002935	38.04	0.0535258	2	1092.58	-0.125947	47.424	0	C1203	51.85	B1503	8.4	B1503	0.15
High	KASGTLREY	7	1	1	Q02543		0	4.03591e+08	0	0.0002135	38.01	0.0510822	2	1024.54	-0.653751	22.3137	0	C1203	88.89	B1503	39.8	C1203	0.8
High	MKIPTGQEY	18	1	1	Q13557		0	3.49891e+07	0	0.001175	37.93	0.0689678	2	1066.52	-0.754304	46.0513	0	C1203	48.15	B1503	7.4	B1503	0.12
High	VKDDIFRIY	2	1	1	Q13501		0	4.82635e+06	0	1.9e-07	37.75	0.0505152	2	1168.64	-0.187777	58.1808	0	C1203	48.15	B1503	79.9	B1503	1.6
High	IQKAVSEGY	4	1	1	P32320		0	1.32849e+07	0	2.486e-05	37.74	0.0653551	2	994.52	0.0121073	29.8367	0	C1203	37.04	B1503	9.4	B1503	0.17
High	NTIPFIIRY	31	1	1	Q8N5C6		0	1.79707e+08	0	0.0003358	37.67	0.0366114	2	1136.65	-0.540026	73.8771	0	C1203	81.48	C1203	142.6	C1203	0.7
High	RSSPPGHYY	6	1	1	Q9NX40		0	2.67493e+07	0	0.0004473	37.56	0.0645428	2	1063.49	-0.965558	24.2451	0	C1203	77.78	B1503	28.9	C1203	0.5
High	RKLPEKTQTF	9	1	1	Q96SY0		0	5.47331e+07	0	0.001106	37.48	0.0398655	3	1247.71	-0.101286	24.8851	0	C1203	34.29	B1503	39.5	B1503	1
High	NANEMFRIF	1	1	1	Q14204		0	6.75193e+06	0	0.001232	37.47	0.0534406	2	1141.55	-0.00461107	73.7519	0	C1203	74.07	B1503	84.6	C1203	1.3
High	LAAPVISVL	14	1	1	O60337		0	5.13947e+07	0	0.001411	37.44	0.011377	2	882.566	-0.168642	83.666	0	C1203	92.59	C1203	8.2	C1203	0.01
High	TKQGWSSAY	1	2	2	Q7Z7E8;Q8WVN8		0	8.15879e+06	0	3.711e-05	37.42	0.0582346	2	1027.48	-0.653172	35.2063	0	C1203	40.74	B1503	16	B1503	0.4
High	GKYGTLQEF	19	1	1	O75182		0	7.00448e+07	0	3.508e-05	37.36	0.0705414	2	1042.52	0.245733	48.4875	0	C1203	40.74	B1503	7.4	B1503	0.12
High	EVSPVSRQSI	21	1	1	Q9H6S3		0	5.46921e+07	0	0.001228	37.22	0.0819756	2	1101.59	-0.572176	38.5127	0	C1203	20	A6802	63.6	A6802	0.6
High	QLVDIIEKV	20	1	1	P61289		0	4.12036e+07	0	0.001414	37.2	0.035251	2	1056.63	-0.750794	69.7447	0	C1203	44.44	A6802	145.4	A6802	1
High	STFGYVHGV	30	1	1	P38606		0	8.6221e+07	0	0.001262	37.19	0.0681913	2	966.468	-0.29213	48.4833	0	C1203	77.78	A6802	2.4	A6802	0.01
High	LSAPIHTQM	20	1	1	Q8NG31		0	6.81013e+07	0	0.001024	37.15	0.0603219	2	997.513	-0.70808	44.71	0	C1203	70.37	C1203	22	C1203	0.09
High	EIFNLKFAQA	18	1	1	P78347		0	3.06218e+07	0	0.0005942	37.01	0.0655728	2	1180.64	-0.297733	71.053	0	C1203	8.57	A6802	102.8	A6802	0.8
High	TLFGSVIRY	2	1	1	P09871		0	9.05585e+06	0	4.917e-05	36.98	0.0589415	2	1055.59	0.33291	68.5403	0	C1203	51.85	B1503	36.9	B1503	0.9
High	FKFVEQQSY	3	1	1	Q99590		0	1.0808e+07	0	0.0003534	36.75	0.0783365	2	1175.57	-0.63459	52.8095	0	C1203	44.44	B1503	6.4	B1503	0.09
High	GQFGTINNF	7	1	1	Q14457		0	1.74138e+07	0	0.00126	36.74	0.067205	2	997.474	-0.19241	66.012	0	C1203	40.74	B1503	3.6	B1503	0.03
High	SIYGSYRNF	22	1	1	Q7L576		0	5.75732e+07	0	0.0001736	36.65	0.0796529	2	1106.53	-0.013053	52.8769	0	C1203	40.74	B1503	33.7	B1503	0.8
High	YAFPKSITVF	16	1	1	P53985		0	52415495	0	0.001044	36.64	0.077929	2	1172.64	0.41304	75.4269	0	C1203	77.14	B1503	5.9	C1203	0.06
High	HATDVLHAV	10	2	2	Q14432;Q13370		0	1.24502e+07	0	0.001099	36.47	0.0940356	2	962.506	0.293576	34.169	0	C1203	77.78	A6802	7.8	A6802	0.05
High	KQTQTFTTY	4	3	3	P54652;P17066;P11142		0	2.70055e+07	0	0.0002372	36.41	0.10884	2	1117.55	-0.887744	34.9835	0	C1203	40.74	B1503	2.2	B1503	0.01
High	SKASQFTGY	4	1	1	O94966		0	9.96142e+06	0	0.001262	36.4	0.0904549	2	988.474	0.468654	33.08	0	C1203	44.44	B1503	13.5	B1503	0.3
High	VKVVPTVY	18	1	1	Q9Y282		0	2.20038e+07	0	0.001388	36.39	0.0380931	2	904.55	-0.0473194	47.2499	0	C1203	36.67	B1503	272.9	B1503	3.5
High	AQAASQHVF	5	1	1	Q9NQT4		0	1.54347e+07	0	0.0001422	36.35	0.075941	2	958.474	-0.226139	30.3504	0	C1203	40.74	B1503	3	B1503	0.01
High	EVAALIRSL	16	1	1	Q6P2Q9		0	5.19026e+07	0	0.001319	36.33	0.0569102	2	971.588	-0.412732	64.838	0	C1203	48.15	A6802	24.8	A6802	0.25
High	SKLLANMVY	6	1	1	P28074		0	2.49439e+07	0	0.0001316	36.29	0.070207	2	1038.56	-0.271813	57.1921	0	C1203	40.74	B1503	8.3	B1503	0.15
High	GQLPGLHEY	18	1	1	Q8TAT6		0	7.33153e+07	0	0.001043	36.28	0.0871839	2	1013.5	-0.529943	48.6436	0	C1203	48.15	B1503	6.7	B1503	0.12
High	KKIEKLEEY	5	1	1	O95786		0	5.87602e+07	0	0.0002606	36.18	0.0516804	2	1179.66	-0.18695	25.107	0	C1203	44.44	B1503	30.6	B1503	0.8
High	GKKKYETEF	6	1	1	Q96QD8		0	1.29089e+08	0	0.001352	36.13	0.104826	2	1129.59	-0.583341	22.591	0	C1203	33.33	B1503	132.8	B1503	2.5
High	VQFGANKSQY	5	1	1	Q7Z7E8		0	1.36547e+07	0	0.0003236	36.13	0.0855428	2	1141.56	-0.0307197	36.5356	0	C1203	40	B1503	6.1	B1503	0.08
High	VVYPWTQRF	18	5	5	P68871;P02042;P02100;P69891;P69892		0	3.07255e+07	0	6.984e-05	36.11	0.103914	2	1195.63	0.00902535	67.8294	0	C1203	44.44	C1203	26.3	C1203	0.12
High	RKLDPPGGQFY	40	1	1	O95400		0	1.9736e+08	0	9.044e-05	36.07	0.0948895	2	1277.66	-0.579053	44.3884	0		0	B1503	443.7	B1503	4.5
High	KKAQAQPVM	3	1	1	P24539		0	4.72056e+06	0	0.001157	36.03	0.0584109	2	1000.56	-0.459674	19.5623	0	C1203	37.04	B1503	16.5	B1503	0.4
High	QVFEGHTHYV	14	1	1	P35606		0	5.17898e+07	0	0.0008538	35.99	0.0700166	2	1216.57	-0.451343	35.2953	0	C1203	37.14	A6802	5.1	A6802	0.02
High	KKIDRHMYH	3	1	1	P84098		0	9.5832e+06	0	4.676e-05	35.99	0.0935569	2	1227.64	-0.0278657	17.6375	0	C1203	3.7	B1503	329.4	B1503	4
High	RLFGTTVTF	30	1	1	Q15904		0	1.94309e+08	0	0.0003919	35.95	0.0802185	2	1041.57	-0.234199	65.5774	0	C1203	44.44	B1503	3	B1503	0.01
High	HQQPPSQQY	4	1	1	Q15532		0	3.32768e+07	0	0.0001231	35.93	0.0697909	2	1112.51	-0.0655103	25.183	0	C1203	44.44	B1503	6.9	B1503	0.12
High	NSYVSPRIL	42	1	1	Q9H992		0	162000553	0	0.0004977	35.91	0.0927189	2	1048.58	-0.641671	51.7437	0	C1203	77.78	C1203	143.8	C1203	0.7
High	GKLKQFDAY	5	1	1	Q9Y282		0	3.00442e+07	0	0.001131	35.88	0.0955953	2	1069.57	-0.49088	33.4631	0	C1203	37.04	B1503	45.3	B1503	1.1
High	RQFPTAFEF	22	1	1	Q13614		0	2.39378e+07	0	0.0003519	35.73	0.0815802	2	1142.56	0.056522	69.0356	0	C1203	44.44	B1503	2.3	B1503	0.01
High	FSVDSPRIY	6	1	1	Q9Y2U8		0	6.58333e+06	0	0.001127	35.72	0.105506	2	1083.55	0.0677119	58.308	0	C1203	81.48	C1203	12.6	C1203	0.04
High	EAAAVFKTL	38	1	1	Q8IWZ6		0	8.98811e+07	0	0.0009899	35.66	0.0866137	2	949.535	-0.551493	53.1901	0	C1203	85.19	A6802	38.7	A6802	0.4
High	GKLLIGTLY	8	1	1	Q15165		0	2.61115e+07	0	0.0005579	35.61	0.0179575	2	977.603	-0.0177911	65.1549	0	C1203	37.04	B1503	49.2	B1503	1.1
High	RQAPTGLGL	26	1	1	Q9BX59		0	4.79869e+07	0	0.0006689	35.54	0.0544267	2	912.526	-0.290178	40.568	0	C1203	51.85	B1503	6.2	B1503	0.09
High	FTADVRSVL	24	1	1	O95476		0	5.03301e+07	0	0.001141	35.54	0.100923	2	1007.55	-0.14274	60.8292	0	C1203	81.48	C1203	5.9	C1203	0.01
High	KAIDYIRFL	21	1	1	P36956		0	4.31725e+07	0	5.407e-05	35.49	0.0453676	2	1138.66	-0.677013	66.7548	0	C1203	85.19	C1203	20.2	C1203	0.08
High	KLFPGSPAIY	11	7	7	P49792;P0DJD0;P0DJD1;A6NKT7;Q7Z3J3;Q99666;O14715		0	2.95286e+07	0	0.001193	35.44	0.0989012	2	1092.61	-0.817809	62.7536	0	C1203	51.43	B1503	9.2	B1503	0.17
High	GQYNKEDPTSF	9	1	1	Q15437		0	2.81588e+07	0	0.0007169	35.43	0.0673082	2	1285.57	-1.56259	40.9602	0		0	B1503	24.5	B1503	0.6
High	RQKDVKDGKY	2	1	1	P62269		0	5.71332e+06	0	2.834e-05	35.4	0.0862902	2	1236.67	0.0339321	16.254	0	C1203	34.29	B1503	113.7	B1503	2
High	EAFQGTKVFV	19	1	1	P61289		0	6.61442e+07	0	0.001244	35.37	0.107086	2	1125.59	-0.453016	56.3097	0	C1203	68.57	A6802	13	A6802	0.12
High	RKFDAIYKY	6	1	1	Q5C9Z4		0	2.07091e+07	0	0.0003449	35.37	0.125904	3	1203.65	0.229803	36.9124	0	C1203	48.15	B1503	13	B1503	0.3
High	YVFDGKPPQL	23	1	1	P39748		0	3.665e+07	0	7.17e-06	35.29	0.132341	2	1163.61	-0.556014	63.7776	0	C1203	57.14	C1203	243.1	C1203	1
High	DVFHMVVEV	11	1	1	Q15181		0	1.63573e+08	0	0.001237	35.19	0.133063	2	1074.53	-0.609997	82.0231	0	C1203	51.85	A6802	14.1	A6802	0.12
High	ETFAFQAEI	30	5	5	Q58FF8;Q58FF7;Q14568;P07900;P08238		0	1.55558e+08	0	0.001234	35.17	0.12121	2	1055.5	-0.471293	80.0339	0	C1203	66.67	A6802	3	A6802	0.01
High	RAYQQSEAY	3	1	1	Q9P0W2		0	1.30465e+08	0	8.903e-05	35.12	0.0747799	2	1115.51	-0.535515	28.0283	0	C1203	77.78	B1503	4	B1503	0.03
High	KKYGPKGYGY	4	2	2	P21291;Q16527		0	1.96561e+07	0	1.744e-05	35.1	0.124647	2	1160.61	-0.298663	24.7179	0	C1203	42.86	B1503	53.5	B1503	1.2
High	GKFQDNFEF	14	2	2	Q15691;Q9UPY8		0	2.87949e+07	0	0.0008573	35.05	0.0656633	2	1131.51	-0.157069	60.8659	0	C1203	37.04	B1503	18.8	B1503	0.5
High	DTAPVIIFV	19	1	1	Q7Z2Z2		0	6.60954e+07	0	0.001165	35.03	0.116262	2	974.556	-0.176192	97.4654	0	C1203	85.19	A6802	2.7	A6802	0.01
High	GQYSPPPYSEY	20	1	1	Q96BY9		0	4.22957e+07	0	0.000118	34.94	0.043958	2	1287.55	0.0642646	59.0728	0		0	B1503	17.7	B1503	0.5
High	mVVDIVQEL	29	1	1	O00764	M1(Oxidation)	0	7.44898e+07	0	0.001469	34.89	0.1202	2	1061.55	-0.278216	79.0436	0	C1203	48.15	A6802	12.4	C1203	0.06
High	SKLPSSIEY	16	1	1	Q15386		0	3.82947e+07	0	0.001184	34.86	0.109113	2	1023.54	-0.276796	46.941	0	C1203	51.85	B1503	11.5	B1503	0.25
High	KQMEQISQF	1	2	2	P37802;Q9UI15		0	8.63001e+07	0	1.279e-05	34.84	0.11608	2	1138.56	-0.189273	44.1068	0	C1203	37.04	B1503	2.3	B1503	0.01
High	KQFPEVIKY	5	1	1	Q9UIF9		0	2.33402e+08	0	0.001376	34.81	0.0807588	2	1151.65	-0.0344531	46.2864	0	C1203	55.56	B1503	3.6	B1503	0.03
High	RKNPVQEQTY	1	1	1	Q8N9N2		0	9.9842e+06	0	0.00084	34.69	0.138754	2	1262.65	0.128365	25.0875	0	C1203	34.29	B1503	74.8	B1503	1.5
High	YCSNLVRTL	3	1	1	Q9Y5B9		0	1.34266e+07	0	0.001287	34.65	0.100705	2	1068.55	0.718637	52.6768	0	C1203	55.56	C1203	264.9	C1203	1.1
High	RQFPVTVHF	16	1	1	Q8IY37		0	3.92884e+07	0	0.0004852	34.65	0.144374	2	1130.61	-0.161098	54.5533	0	C1203	44.44	B1503	2.5	B1503	0.01
High	SQFKGYFIF	20	1	1	Q9NY27		0	4.11411e+07	0	0.001345	34.62	0.127047	2	1136.58	-0.518579	77.0435	0	C1203	33.33	B1503	2.2	B1503	0.01
High	AAAPQLLIV	39	1	1	Q10589		0	2.14362e+08	0	0.001105	34.5	0.0232758	2	895.561	-0.246343	78.5905	0	C1203	92.59	C1203	97.7	C1203	0.5
High	TKYLENQAF	19	1	1	Q99661		0	29437235	0	2.915e-05	34.46	0.134107	2	1113.56	-0.208992	46.793	0	C1203	33.33	B1503	9.3	B1503	0.17
High	YQYLEQSKY	3	1	1	Q9BTE7		0	1.13856e+07	0	1.475e-05	34.33	0.13785	2	1221.58	-0.0757138	45.1482	0	C1203	44.44	B1503	3.7	B1503	0.03
High	AKNPSWASITY	7	2	2	Q8N6H7;Q9NP61		0	8.56785e+06	0	3.397e-06	34.03	0.15787	2	1237.62	-0.0484407	58.1955	0		0	B1503	110.4	B1503	2
High	FLWAGGRASY	9	1	1	Q00839		0	1.10946e+07	0	0.0007806	33.98	0.128682	2	1127.56	-0.235393	60.7205	0	C1203	42.86	B1503	12.9	B1503	0.3
High	RKIANSDKY	2	1	1	O75164		0	5.7672e+06	0	0.0008118	33.88	0.1255	2	1094.59	-0.499855	18.0566	0	C1203	37.04	B1503	33.4	B1503	0.8
High	SKNVSGISF	11	1	1	P49792		0	1.47876e+07	0	0.001456	33.61	0.14618	2	938.494	-0.4148	43.8007	0	C1203	33.33	B1503	5.9	B1503	0.08
High	FGFHKPKMY	27	1	1	Q9NP50		0	2.16229e+08	0	0.0006169	33.5	0.158841	2	1154.58	-1.0579	38.1445	0	C1203	51.85	C1203	38.2	C1203	0.17
High	YAFPKAVSV	42	1	1	O15427		0	620634544	0	6.526e-05	33.48	0.146717	2	981.54	-0.0402051	57.2691	0	C1203	92.59	C1203	2.7	C1203	0.01
High	LQRLENTQY	4	1	1	Q96D70		0	9.92815e+06	0	0.0006326	33.46	0.20857	2	1164.6	-1.28846	37.9839	0	C1203	37.04	B1503	6.6	B1503	0.1
High	FQYPDTRYL	23	1	1	Q9NY61		0	5.00348e+07	0	0.000194	33.45	0.198274	2	1202.58	-0.0327015	62.8736	0	C1203	55.56	B1503	5.4	C1203	0.01
High	FAADIISVL	4	1	1	Q13200		0	1.11567e+08	0	0.0007309	33.38	0.125568	2	948.54	-0.219015	93.2263	0	C1203	92.59	C1203	3.3	C1203	0.01
High	AATPAVRTV	15	2	2	P11940;Q9H361		0	3.71552e+08	0	0.001217	33.35	0.150736	2	885.515	0.0170385	30.4653	0	C1203	96.3	C1203	70.3	C1203	0.4
High	KQPDNSPEY	6	1	1	Q9NX07		0	2.55206e+07	0	5.692e-05	33.34	0.142742	2	1077.48	-0.540928	25.4242	0	C1203	44.44	B1503	27.2	B1503	0.7
High	QKLIFTVGY	1	1	1	Q8TDB6		0	2.15162e+07	0	0.001053	33.28	0.108475	2	1068.61	-0.369886	65.2546	0	C1203	40.74	B1503	41.1	B1503	1
High	NLYGSPREY	36	1	1	Q9NZM1		0	7.16351e+08	0	0.0009054	33.24	0.157591	2	1098.52	-1.27824	41.1164	0	C1203	55.56	B1503	39.1	B1503	1
High	RKDGSFIVRY	4	1	1	Q6UW63		0	7.15238e+06	0	0.0008861	33.23	0.120402	3	1240.68	-0.106166	34.6538	0	C1203	31.43	B1503	95.7	B1503	1.8
High	GSFGGIRLY	2	1	1	Q5VYK3		0	3.39166e+06	0	0.001424	33.12	0.16771	2	969.516	0.529511	63.8184	0	C1203	81.48	C1203	30.1	C1203	0.12
High	KKVVKETSY	2	1	1	Q9NZJ7		0	5.3022e+06	0	0.0006012	33.12	0.0801497	2	1081.62	-0.612026	17.844	0	C1203	37.04	B1503	31.5	B1503	0.8
High	YQKQPKIGY	4	1	1	Q68E01		0	2.00014e+07	0	0.0001082	32.72	0.167078	2	1124.61	-0.633857	29.5527	0	C1203	44.44	B1503	9.2	B1503	0.17
High	SKYFERHGY	4	1	1	O95786		0	4.73221e+07	0	0.001192	32.7	0.160653	2	1186.56	-0.607873	26.4728	0	C1203	40.74	B1503	21.9	B1503	0.6
High	ETIMNQEKL	23	1	1	P20290		0	7.56722e+07	0	0.000963	32.55	0.282788	2	1105.55	-1.22142	43.7608	0	C1203	66.67	A6802	227	A6802	1.4
High	FAFPLHVDY	18	1	1	Q8TDY4		0	3.78318e+07	0	0.0007415	32.47	0.197334	2	1108.55	-0.37647	78.026	0	C1203	92.59	C1203	8.8	C1203	0.02
High	QAYPEVRIV	35	1	1	Q08211		0	1.33914e+08	0	0.000974	32.36	0.226905	2	1074.59	-0.431513	55.0962	0	C1203	92.59	C1203	79.9	C1203	0.4
High	HAAHIISEL	33	1	1	Q96I24		0	1.27547e+08	0	0.0004227	32.24	0.246486	2	990.537	-0.0116829	37.1941	0	C1203	85.19	C1203	13.2	C1203	0.04
High	GKYIPKQSF	8	1	1	Q9P0I2		0	6.86831e+07	0	0.0002956	32.24	0.175648	2	1067.59	-0.471227	32.0807	0	C1203	33.33	B1503	17.8	B1503	0.5
High	RKKPPMNSm	3	1	1	Q01844	M9(Oxidation)	0	9.982e+06	0	0.0001953	32.08	0.270727	2	1104.57	-0.185797	16.2611	0	C1203	37.04	B1503	30.7	B1503	0.8
High	RQLEDILSTY	25	1	1	P40222		0	5.60813e+07	0	0.0013	32.07	0.280043	2	1237.64	-0.452529	66.7597	0	C1203	28.57	B1503	5.5	B1503	0.07
High	AQLHPLSGY	9	1	1	Q7L7V1		0	1.43892e+07	0	0.001112	31.94	0.239357	2	985.51	-0.373488	43.8693	0	C1203	40.74	B1503	5.8	B1503	0.08
High	HTFFIKDSL	8	1	1	Q8NFG4		0	2.06656e+07	0	0.001105	31.72	0.294495	2	1107.58	-0.827243	52.9082	0	C1203	70.37	A6802	12.6	A6802	0.1
High	HTILIVEKV	11	1	1	Q8TD19		0	4.24618e+07	0	0.00112	31.71	0.0379759	2	1051.65	-0.350816	46.2067	0	C1203	70.37	A6802	7.1	A6802	0.04
High	TVFNFQEKV	3	1	1	Q14204		0	2.72894e+07	0	0.001193	31.64	0.262645	2	1111.58	-0.537059	58.0541	0	C1203	40.74	A6802	12.3	A6802	0.1
High	RKYNELLKSY	21	1	1	P10909		0	7.26321e+07	0	0.001283	31.63	0.215808	3	1313.72	-0.45335	34.813	0	C1203	34.29	B1503	15.3	B1503	0.4
High	AQLERQLQF	2	1	1	Q6P1N0		0	8.25763e+06	0	0.0005797	31.35	0.287744	2	1132.61	-0.51398	52.6972	0	C1203	40.74	B1503	5.5	B1503	0.07
High	RANPFNTPH	4	1	1	Q00325		0	9.371e+06	0	0.0006104	31.04	0.263936	2	1053.52	-0.215377	26.7603	0	C1203	44.44	B1503	127.1	B1503	2.5
High	AQFETKKLY	36	1	1	O60613		0	1.40153e+08	0	0.001315	30.95	0.2689	2	1127.61	-0.240129	35.9807	0	C1203	51.85	B1503	4.1	B1503	0.03
High	RKFYKGKKY	11	1	1	P42766		0	2.16839e+08	0	0.0005109	30.95	0.147809	3	1217.72	0.045921	18.1214	0	C1203	44.44	B1503	20.2	B1503	0.5
High	KKHEDVKQY	1	1	1	Q9BZD4		0	1.42958e+06	0	0.0001436	30.89	0.331218	2	1174.62	-0.228057	16.3006	0	C1203	48.15	B1503	56.9	B1503	1.3
High	AKLPEIEEY	15	1	1	Q9BQ39		0	1.82776e+07	0	0.001306	30.71	0.361666	2	1091.56	-0.58119	54.7046	0	C1203	55.56	B1503	85	B1503	1.7
High	ETYPDPVRV	97	1	1	P49588		0	2637496789	0	0.001169	30.65	0.486117	2	1075.54	-1.2239	49.6067	0	C1203	85.19	A6802	9.8	A6802	0.07
High	RQQQSQTAY	3	2	2	Q99613;B5ME19		0	7.80076e+06	0	0.001223	30.64	0.318957	2	1109.53	-0.382789	19.539	0	C1203	37.04	B1503	3.1	B1503	0.01
High	FSKDIFSVI	48	1	1	Q01650		0	4.56891e+08	0	0.001417	30.61	0.252303	2	1055.58	0.0917096	76.8378	0	C1203	70.37	C1203	14.4	C1203	0.05
High	EIFSKNYRV	23	1	1	Q9NVU0		0	8.40504e+07	0	0.001131	30.46	0.303221	2	1155.62	-0.591431	41.5723	0	C1203	44.44	A6802	8.7	A6802	0.06
High	RMNPNSPSITY	4	1	1	P84090		0	1.41639e+07	0	0.0001729	30.44	0.283836	2	1279.61	-0.53983	44.6229	0		0	B1503	22.1	B1503	0.6
High	YVVPFVAKV	17	1	1	A5YKK6		0	1.45196e+07	0	0.001185	30.33	0.130915	2	1021.61	-0.399063	68.1856	0	C1203	51.85	A6802	7.3	A6802	0.05
High	RNYYRKIGY	10	1	1	Q9H9T3		0	5.01031e+07	0	0.001081	30.21	0.471348	3	1232.65	0.342741	28.232	0	C1203	44.44	B1503	72.3	B1503	1.5
High	VKIQKHVTF	5	1	1	P23381		0	1.17515e+07	0	0.000733	30.18	0.158733	2	1099.66	-0.335073	27.1788	0	C1203	40.74	B1503	9.3	B1503	0.17
High	RQYGSEGRFTF	21	2	2	Q7Z7H5;Q9BVK6		0	5.28697e+07	0	0.001196	30.06	0.390764	3	1347.64	-0.358003	43.9627	0		0	B1503	8.2	B1503	0.15
High	KKKEKDVQF	2	1	1	Q92544		0	4.83671e+06	0	0.0008425	29.87	0.185882	2	1149.66	-0.252409	17.6778	0	C1203	37.04	B1503	112.3	B1503	2
High	RQINWTVLY	24	1	1	P83731		0	1.13121e+08	0	0.001187	29.86	0.323151	2	1192.65	-0.584629	69.3274	0	C1203	40.74	B1503	2.5	B1503	0.01
High	HAAGVLLHV	32	1	1	Q6UX98		0	4.36029e+07	0	0.0009375	29.85	0.293618	2	916.536	-0.319637	39.2191	0	C1203	85.19	A6802	6.7	A6802	0.04
High	GQYSTGKTTF	7	3	3	Q9H4M9;Q9NZN3;Q9H223		0	1.95655e+07	0	0.001044	29.83	0.419816	2	1089.52	-0.0895875	33.9409	0	C1203	31.43	B1503	4.1	B1503	0.03
High	GHYLGEFSITY	16	1	1	P62841		0	4.01681e+07	0	0.0002223	29.83	0.31468	2	1286.61	0.0551126	71.2719	0		0	B1503	127.4	B1503	2.5
High	YAAGVHSVL	23	1	1	O43299		0	4.75093e+07	0	0.001005	29.79	0.548176	2	916.488	-0.494809	42.8614	0	C1203	88.89	C1203	7.6	C1203	0.01
High	QVCAIIERV	78	2	2	Q99613;B5ME19		0	6.2028e+08	0	0.001312	29.63	0.335173	2	1030.57	-0.447179	56.6193	0	C1203	40.74	A6802	95.1	A6802	0.8
High	RQYPEVIKY	28	1	1	Q9UIF8		0	6.07822e+07	0	6.088e-05	29.59	0.338494	2	1195.65	-0.298797	42.0919	0	C1203	55.56	B1503	2.8	B1503	0.01
High	IAFSRPVKY	13	1	1	Q99759		0	2.19745e+07	0	0.001227	29.57	0.202046	2	1080.62	-0.0357055	40.9336	0	C1203	88.89	B1503	11.9	C1203	0.04
High	EVIDFSHGL	61	3	3	Q96GS6;Q5VST6;Q6PCB6		0	1.27704e+09	0	0.001264	29.53	0.50901	2	1016.5	-0.333663	65.7213	0	C1203	40.74	A6802	3.3	A6802	0.01
High	LSFQEVREY	1	1	1	O00311		0	2.25947e+07	0	0.0006303	29.4	0.420856	2	1170.58	-0.290813	57.7848	0	C1203	81.48	B1503	19.2	C1203	0.15
High	YAKDDPLEF	9	1	1	P06756		0	3.60638e+07	0	0.001139	29.39	0.342593	2	1097.51	-0.843374	57.2076	0	C1203	85.19	B1503	28.5	C1203	0.2
High	KKKQIEQKF	1	1	1	Q9NQS7		0	1.068e+07	0	0.00108	29.11	0.123787	2	1176.71	-0.279572	17.808	0	C1203	29.63	B1503	242.7	B1503	3.5
High	RQVLTSSF	5	1	1	Q9NP66		0	4.1394e+06	0	0.001113	29	0.401094	2	937.51	-0.533484	42.0955	0	C1203	33.33	B1503	6.3	B1503	0.09
High	GKYGFSDPLTF	8	2	2	Q92569;P27986		0	1.47185e+07	0	0.001316	28.99	0.496529	2	1231.6	-0.0978705	72.7847	0		0	B1503	51	B1503	1.2
High	GKNLYTNEY	1	3	3	Q9HCP0;P78368;Q9Y6M4		0	7.30639e+06	0	9.592e-05	28.78	0.41922	2	1101.52	-0.190353	35.9863	0	C1203	40.74	B1503	24.2	B1503	0.6
High	ETLFPSKIGV	14	2	2	Q9H8S9;Q7L9L4		0	8.62685e+07	0	0.001353	28.76	0.418761	2	1090.61	0.0790211	65.3708	0	C1203	45.71	A6802	6.4	A6802	0.04
High	KKIDASQTEF	2	1	1	O94979		0	1.52016e+07	0	0.001077	28.61	0.482299	2	1166.61	0.035066	28.4948	0	C1203	34.29	B1503	17.1	B1503	0.5
High	LSFPYSYEV	1	1	1	Q53EP0		0	1.55165e+07	0	0.0009278	28.56	0.449432	2	1104.52	0.116469	83.5291	0	C1203	81.48	A6802	16.5	C1203	0.06
High	RKAPPNYAM	4	1	1	Q92541		0	1.68282e+07	0	0.0007054	28.54	0.574601	2	1047.54	-0.241106	25.6512	0	C1203	40.74	B1503	18.7	B1503	0.5
High	YTSDLHFQV	21	1	1	Q1KMD3		0	5.62778e+07	0	0.001079	28.46	0.512862	2	1109.53	-0.815796	59.3083	0	C1203	77.78	A6802	3.1	A6802	0.01
High	KQFQKVITEY	17	1	1	Q7KZF4		0	3.45436e+07	0	0.0007766	28.38	0.468379	2	1283.7	-0.61954	39.0887	0	C1203	37.14	B1503	5	B1503	0.05
High	TGYIYPRLY	11	1	1	O14656		0	1.49639e+07	0	0.00141	28.35	0.556358	2	1145.6	-0.47576	63.0601	0	C1203	48.15	B1503	84.8	C1203	0.5
High	ELADIKQAYL	8	1	1	Q8WXX5		0	1.15708e+07	0	0.001151	28.31	0.525352	2	1163.63	-0.566175	61.0249	0	C1203	34.29	A6802	31.1	A6802	0.3
High	YKITAEEMY	8	1	1	Q9Y3B4		0	1.55314e+07	0	0.001024	28.25	0.441913	2	1147.53	0.605008	53.1702	0	C1203	40.74	B1503	35.3	B1503	0.9
High	EVFPLAMNYL	17	3	3	P24385;P30279;P30281		0	2.56132e+07	0	0.00127	28.1	0.598927	2	1196.6	-0.581097	99.743	0	C1203	40	A6802	11.2	A6802	0.09
High	AKVSGGPSL	2	1	1	Q9Y262		0	5.65444e+06	0	0.001468	28.07	0.855648	2	815.462	0.0177836	27.598	0	C1203	44.44	B1503	26.2	B1503	0.7
High	RKLEAAEDIAY	1	1	1	P35232		0	5.575e+07	0	0.001146	27.93	0.703369	2	1278.67	-0.501155	40.7171	0		0	B1503	103.4	B1503	1.9
High	YKKGKDSLY	4	2	2	P83881;Q969Q0		0	2.66084e+07	0	0.0002881	27.78	0.798528	2	1101.59	-0.214028	21.1149	0	C1203	44.44	B1503	33.8	B1503	0.8
High	ETFNDFVRL	17	1	1	O43913		0	3.95901e+07	0	0.001232	27.66	0.653789	2	1140.57	-0.0388633	73.2893	0	C1203	74.07	A6802	16	A6802	0.15
High	GKLSEGVTISY	8	1	1	P05556		0	1.022e+07	0	0.0009672	27.63	0.53035	2	1153.61	-0.264007	52.6907	0		0	B1503	446.1	B1503	4.5
High	HKFPDEDSY	22	1	1	Q6VY07		0	1.18033e+08	0	0.001387	27.52	0.266932	2	1137.48	-0.512396	34.418	0	C1203	48.15	B1503	55.7	B1503	1.3
High	RLFKDQLVY	12	1	1	Q9Y3I1		0	2.43952e+07	0	0.0005866	27.43	0.38294	2	1181.67	0.00923113	50.4896	0	C1203	48.15	B1503	4.1	B1503	0.03
High	KHQPHKVTQY	5	2	2	P83881;Q969Q0		0	4.39311e+07	0	0.001155	27.4	0.645448	3	1265.68	0.152263	17.3873	0	C1203	31.43	B1503	59.5	B1503	1.3
High	TTYDLTHTL	16	1	1	Q9NTJ5		0	38039473	0	0.0007478	27.39	0.871913	2	1064.53	-0.645562	55.0079	0	C1203	77.78	A6802	10.1	C1203	0.04
High	ETIFGEWTV	17	1	1	Q96MT1		0	2.42734e+08	0	0.001232	27.39	0.687609	2	1081.52	-0.257333	93.8348	0	C1203	70.37	A6802	3.8	A6802	0.01
High	EVFALIHEL	3	1	1	Q12766		0	9.84572e+06	0	0.001017	27.29	0.604707	2	1070.59	-0.399049	78.6802	0	C1203	48.15	A6802	7.1	A6802	0.04
High	YLLPDTKAY	9	1	1	P14625		0	1.56262e+07	0	6.005e-05	27.17	0.610904	2	1083.57	-0.489583	56.5918	0	C1203	51.85	B1503	9.9	B1503	0.2
High	AQRPDNPREF	2	1	1	Q16643		0	2.28427e+06	0	0.0005107	27.16	0.709621	3	1229.6	0.0380115	26.6975	0	C1203	42.86	B1503	25.5	B1503	0.7
High	AQYENPPHIY	4	2	2	Q12965;O00160		0	1.53144e+07	0	0.0009023	27.07	0.630533	2	1231.57	0.127576	47.8455	0	C1203	40	B1503	5.7	B1503	0.07
High	EIAEAYLGYPV	4	1	1	P08107		0	2.79567e+07	0	0.0004376	27.05	0.705437	2	1224.62	0.457837	81.7869	0		0	A6802	22.5	A6802	0.25
High	QKIDVQESF	11	1	1	O95602		0	3.75303e+07	0	0.0009859	26.9	0.957779	2	1093.55	-0.0416415	46.7997	0	C1203	33.33	B1503	82.6	B1503	1.6
High	VHAPPMQLGF	4	1	1	O95235		0	8965306	0	0.001399	26.69	0.690225	2	1096.56	-0.475092	63.1644	0	C1203	40	B1503	121.2	B1503	2.5
High	LAAYHPWVV	27	1	1	Q5TA50		0	9.53129e+07	0	0.001235	26.68	0.430533	2	1055.57	-0.118448	62.5364	0	C1203	85.19	C1203	54.8	C1203	0.25
High	SKMFHPNVY	11	2	2	P49459;P63146		0	2.32435e+07	0	0.001162	26.62	0.784738	2	1122.54	-0.239439	36.7167	0	C1203	44.44	B1503	4.3	B1503	0.04
High	HQITVLHVY	22	1	1	Q9NYP7		0	6.77565e+07	0	0.0008873	26.56	0.58744	2	1109.61	-0.389768	46.297	0	C1203	40.74	B1503	3.8	B1503	0.03
High	SVVELVNKL	14	1	1	Q9BQE5		0	12488639	0	0.001272	26.42	0.488107	2	1000.6	-0.146952	63.1587	0	C1203	44.44	A6802	155.9	A6802	1.1
High	YGYRQSVTY	7	1	1	P08174		0	2.65981e+07	0	0.001112	26.41	0.776532	2	1136.54	-0.488042	41.2661	0	C1203	51.85	B1503	7.1	C1203	0.06
High	YKEDHPFEY	7	1	1	Q9H0R8		0	29593554	0	2.162e-05	26.28	0.398121	2	1227.53	0.168346	40.4482	0	C1203	51.85	B1503	78.6	B1503	1.6
High	VKAEIRQQF	2	1	1	P30154		0	8185721	0	0.0002033	26.25	0.633512	2	1118.63	-0.400593	32.8986	0	C1203	40.74	B1503	33.2	B1503	0.8
High	RSFHEVREF	8	1	1	Q92963		0	3.24006e+07	0	0.0003663	26.05	1.18309	3	1206.6	-0.38495	29.4886	0	C1203	74.07	B1503	7.4	B1503	0.12
High	FVNDIFERIA	2	14	14	P33778;P62807;P58876;Q93079;P06899;O60814;Q99880;Q99879;Q99877;P23527;Q16778;Q5QNW6;Q8N257;P57053		0	9.20291e+06	0	0.0001735	25.92	0.935291	2	1223.64	-0.15533	75.2388	0	C1203	14.29	A6802	212.5	A6802	1.3
High	TKQPIPAAY	4	1	1	Q6P1J9		0	14842819	0	0.001446	25.84	1.18254	2	988.544	-2.2127	37.8109	0	C1203	48.15	B1503	21.6	B1503	0.6
High	KQLAEYRKY	2	1	1	O94955		0	7.25649e+06	0	0.001278	25.81	0.725465	3	1198.66	-0.390003	24.1664	0	C1203	40.74	B1503	5.7	B1503	0.07
High	KQTQIFTTY	1	2	2	P34931;P08107		0	1.84819e+07	0	0.001395	25.34	1.25446	2	1129.59	-0.0253048	47.0501	0	C1203	40.74	B1503	2.5	B1503	0.01
High	VKVIDRILY	12	1	1	O75533		0	2.62779e+07	0	0.001447	25.28	0.178335	2	1118.69	-0.733793	52.3783	0	C1203	44.44	B1503	42	B1503	1
High	YSSPEILRV	9	1	1	Q2MV58		0	2.971e+07	0	0.001122	25.18	1.21325	2	1063.58	-0.437121	57.5669	0	C1203	88.89	C1203	33.3	C1203	0.15
High	LLYESPERY	3	1	1	Q03518		0	2.58195e+07	0	4.779e-05	25.16	1.19218	2	1169.58	-0.168955	50.0002	0	C1203	48.15	B1503	16.1	B1503	0.4
High	AKLKKFIAY	10	1	1	P33992		0	1.58594e+07	0	0.00135	25.12	0.170877	2	1081.68	-0.625178	33.0262	0	C1203	44.44	B1503	11.3	B1503	0.25
High	EVFNYIHNI	24	1	1	Q8N3P4		0	6.62561e+07	0	0.001263	25.03	1.30881	2	1148.57	0.0197	65.7115	0	C1203	37.04	A6802	4.4	A6802	0.01
High	QTYGYEHIL	7	1	1	Q96AX1		0	3.53861e+07	0	0.001211	24.84	1.34207	2	1123.54	-0.0584352	56.2694	0	C1203	74.07	A6802	117	A6802	0.9
High	KKIESSGVTY	3	1	1	Q9UKN8		0	2.1958e+07	0	0.001166	24.55	0.999818	2	1111.6	-0.428885	26.0837	0	C1203	31.43	B1503	10.6	B1503	0.25
High	RQFEFSVDSF	2	3	3	Q96IP4;Q5VWP2;Q8NEK8		0	14412318	0	0.001368	24.51	0.972254	2	1261.58	-0.633589	72.0798	0	C1203	40	B1503	2.7	B1503	0.01
High	YKRDPSKQY	3	1	1	Q9UQ80		0	8.45561e+06	0	0.001115	24.29	1.30803	2	1184.61	-0.196589	18.733	0	C1203	48.15	B1503	41.6	B1503	1
High	EIIQRIENV	3	1	1	Q9H074		0	2.14197e+07	0	0.001125	24.24	1.08039	2	1113.63	-0.139246	53.2075	0	C1203	40.74	A6802	26.7	A6802	0.25
High	DTFYIFNHV	1	1	1	Q99805		0	1.21273e+07	0	0.001001	24.01	1.10241	2	1155.55	-0.244769	78.6257	0	C1203	70.37	A6802	3.2	A6802	0.01
High	RQLGLEHTRY	5	1	1	Q92508		0	4.80054e+06	0	2.733e-07	23.84	1.53179	3	1272.68	-0.448947	27.4592	0	C1203	31.43	B1503	15	B1503	0.4
High	GKLQKTVSY	3	1	1	P12757		0	1.25405e+07	0	0.001424	23.75	0.860893	2	1023.58	-0.527587	25.8765	0	C1203	40.74	B1503	16.5	B1503	0.4
High	RKVYWFEKF	7	1	1	O60524		0	1.72062e+07	0	0.001185	23.17	2.14322	3	1302.7	-0.395033	53.7633	0	C1203	29.63	B1503	19	B1503	0.5
High	RAFEYEIRF	29	1	1	O60566		0	4.78276e+07	0	0.00147	22.59	2.04928	2	1230.63	-1.08852	60.6656	0	C1203	77.78	B1503	9.5	B1503	0.2
High	GKYGSSLEF	16	1	1	P55212		0	2.74913e+07	0	0.001406	21.3	2.83996	2	987.479	0.28445	48.4631	0	C1203	44.44	B1503	3.6	B1503	0.03
High	AKLDHVNIVHY	7	1	1	P19525		0	2.15863e+07	0	0.001043	21.18	2.29424	3	1308.71	-0.415956	39.3634	0		0	B1503	366.9	B1503	4
High	YKLDKQHTF	2	1	1	P55884		0	4.88968e+06	0	0.001333	21.16	2.92841	2	1179.62	-0.053505	28.69	0	C1203	40.74	B1503	19.5	B1503	0.5
High	FSYVTPRAF	16	1	1	Q9Y4E8		0	1.3372e+07	0	0.001273	21.15	2.61862	2	1087.56	-0.753329	60.7907	0	C1203	74.07	B1503	3.4	C1203	0.01
High	FAWPKILKI	6	2	2	Q9H4G0;O43491		0	2.25108e+07	0	0.001117	20.84	0.405064	2	1115.7	-0.276129	74.6013	0	C1203	85.19	C1203	14	C1203	0.04
High	YVFSKTYNV	9	1	1	Q14432		0	1.14956e+07	0	0.0003437	17.81	7.92617	2	1120.57	0.179535	53.587	0	C1203	48.15	A6802	3.8	A6802	0.01
High	YATFIVTNY	10	1	1	Q9HBL8		0	4.23532e+07	0	0.001452	17.36	8.50225	2	1091.54	-0.319207	76.3619	0	C1203	81.48	C1203	25.5	C1203	0.1
High	YAAIRDNYF	1	2	2	P11233;P11234		0	4.24442e+06	0	0.000951	17.17	6.09561	2	1132.54	-0.043657	56.6609	0	C1203	74.07	C1203	26.5	C1203	0.12
High	VAASKKKVY	1	1	1	Q9H1D9		0	1.43576e+06	0.001	0.001894	50.01	0.000774714	2	993.609	-0.125716	16.9973	0	C1203	92.59	B1503	205	C1203	2.5
High	SVADTVARV	2	1	1	Q9NYY3		0	1.15361e+07	0.001	0.004291	47.61	0.00813588	2	917.505	-0.474144	40.859	0	C1203	48.15	A6802	8.1	A6802	0.05
High	ITAPPTPGI	2	1	1	Q8NEZ4		0	1.59412e+07	0.001	0.00413	47.27	0.00320812	2	866.498	-0.380765	59.8886	0	C1203	70.37	A6802	34.3	A6802	0.4
High	TTVDINTQV	34	1	1	Q14676		0	2.19084e+08	0.001	0.003151	47.1	0.00886692	2	990.51	-0.257414	53.6762	0	C1203	70.37	A6802	3.9	A6802	0.01
High	DVTQIVEIL	3	1	1	Q86XP3		0	2.36723e+07	0.001	0.001745	46.5	0.00666803	2	1029.58	-0.841693	99.2446	0	C1203	40.74	A6802	406.7	A6802	1.9
High	KKGPSGYGF	6	1	1	O14745		0	9.13789e+07	0.001	0.004439	45.8	0.00980432	2	940.488	-1.14179	28.0857	0	C1203	37.04	B1503	50.9	B1503	1.2
High	TVTSVLEYL	9	1	1	O14893		0	6.40983e+07	0.001	0.001929	45.78	0.00598638	2	1024.56	-0.528726	89.4714	0	C1203	40.74	A6802	19.5	A6802	0.17
High	SSSGIVYKV	16	1	1	Q9P2E3		0	5.93595e+07	0.001	0.00484	45.61	0.00652213	2	939.514	-0.353917	39.646	0	C1203	77.78	A6802	12.5	A6802	0.1
High	YAAPGGLIGV	10	2	2	Q2VIR3;P41091		0	2.73807e+07	0.001	0.001499	45.28	0.017623	2	917.509	0.067108	71.2042	0	C1203	62.86	A6802	31.8	A6802	0.3
High	ASFPGANII	3	1	1	P04150		0	2.47147e+07	0.001	0.005063	44.9	0.0222196	2	889.477	-0.423517	74.2348	0	C1203	74.07	C1203	28.8	C1203	0.12
High	NSSQVVVAV	52	1	1	Q16531		0	4.7597e+08	0.001	0.003738	43.07	0.0218451	2	902.494	-0.634235	49.6614	0	C1203	77.78	A6802	13.7	A6802	0.12
High	SVITQVFHV	15	1	1	Q00341		0	77679174	0.001	0.001483	42.99	0.0216635	2	1029.57	-0.108652	69.8414	0	C1203	40.74	A6802	10.4	A6802	0.08
High	ISAPLVKTL	28	1	1	P30305		0	5.48561e+07	0.001	0.002254	42.92	0.00626645	2	941.603	-0.0290915	54.8369	0	C1203	88.89	C1203	53.8	C1203	0.25
High	NSYGSHRTL	3	1	1	Q9Y446		0	2.06593e+07	0.001	0.004878	42.68	0.0225947	2	1034.5	-0.60056	21.9231	0	C1203	81.48	C1203	59.7	C1203	0.3
High	LKPGMVVTF	26	2	2	P68104;Q5VTE0		0	6.69545e+07	0.001	0.004134	42.33	0.0147747	2	991.564	-0.922854	60.8564	0	C1203	44.44	B1503	58.1	B1503	1.3
High	IKADHVSTY	3	1	1	P20036		0	2.18695e+07	0.001	0.002025	42.07	0.0315184	2	1033.53	-0.603807	25.9444	0	C1203	51.85	B1503	3.3	B1503	0.02
High	MTPEIIQKL	52	1	1	Q9UMS4		0	4.56027e+08	0.001	0.00353	41.75	0.0236326	2	1072.61	-0.727629	60.2309	0	C1203	74.07	A6802	29.6	A6802	0.3
High	DTFYVQVLV	4	1	1	Q5BJD5		0	4.3813e+07	0.001	0.002482	41.4	0.0229501	2	1083.57	-0.273501	95.6764	0	C1203	74.07	A6802	4.7	A6802	0.02
High	FTAAIISRV	10	1	1	Q9Y570		0	47302753	0.001	0.005375	41.29	0.0130177	2	977.577	-0.836081	57.1142	0	C1203	77.78	A6802	2.5	A6802	0.01
High	SSYGNIRAV	8	1	1	Q8N122		0	2.20058e+07	0.001	0.002733	41.14	0.0257043	2	966.498	-2.1456	37.7981	0	C1203	81.48	C1203	7.2	C1203	0.01
High	DAANVMVYV	8	1	1	Q9Y4C1		0	2.1389e+07	0.001	0.004243	41.07	0.0329769	2	981.471	-0.233875	77.899	0	C1203	81.48	A6802	3.8	A6802	0.01
High	EVFGVIRSL	17	1	1	Q15393		0	3.41729e+07	0.001	0.003396	40.76	0.0214986	2	1019.59	0.025736	68.9902	0	C1203	51.85	A6802	24.5	A6802	0.25
High	FVGYFPATV	3	1	1	Q9HCE1		0	2.35093e+07	0.001	0.002102	40.46	0.0338031	2	1000.51	-0.405759	81.8791	0	C1203	48.15	C1203	25	C1203	0.1
High	SVFTFVAEV	4	1	1	Q7Z429		0	4.47011e+07	0.001	0.001582	40.43	0.0302152	2	998.519	0.0244795	90.8721	0	C1203	48.15	A6802	6.7	A6802	0.04
High	AAFAYTVKY	18	1	1	Q8N2K1		0	3.70849e+08	0.001	0.002256	40.3	0.0451928	2	1033.54	0.231013	54.9442	0	C1203	85.19	B1503	6.5	B1503	0.1
High	EVFAWNNEV	16	1	1	P49419		0	3.31753e+07	0.001	0.002705	40.02	0.0308178	2	1107.51	-0.270693	75.9489	0	C1203	44.44	A6802	3.2	A6802	0.01
High	TAFPFQVEV	3	1	1	A6NHR9		0	5.44519e+07	0.001	0.002261	39.49	0.0542172	2	1037.53	0.283246	87.7872	0	C1203	92.59	A6802	9.9	C1203	0.05
High	FAYEGPMYL	3	1	1	Q96MT1		0	2.21588e+07	0.001	0.001571	39.36	0.0272486	2	1090.49	-0.0464868	84.1116	0	C1203	88.89	C1203	2.1	C1203	0.01
High	GKSGVAITF	9	1	1	Q9BUQ8		0	1.3469e+07	0.001	0.00151	39.29	0.0378247	2	879.493	-0.040362	47.523	0	C1203	44.44	B1503	18.5	B1503	0.5
High	GKLHPSSSL	2	1	1	A5PLN9		0	1.29203e+07	0.001	0.00159	39.23	0.0354555	2	925.51	-0.672297	23.2286	0	C1203	37.04	B1503	84	B1503	1.7
High	TAQTLVRIL	17	1	1	Q12905		0	2.41628e+07	0.001	0.001687	39.19	0.0170995	2	1014.63	-0.108943	58.8364	0	C1203	81.48	C1203	596.3	C1203	1.9
High	RKIGDTSVSY	11	1	1	P20700		0	3.85365e+07	0.001	0.00368	39.17	0.0407972	2	1125.59	-0.659542	33.0569	0	C1203	37.14	B1503	11	B1503	0.25
High	TTADPFVKV	23	1	1	Q8IV01		0	4.48029e+07	0.001	0.003904	38.59	0.0669854	2	977.53	-0.198873	49.6397	0	C1203	77.78	A6802	3.5	A6802	0.01
High	STVEVIFHV	7	2	2	Q6GYQ0;Q2PPJ7		0	1.12333e+07	0.001	0.001879	38.57	0.0777053	2	1030.56	-0.47478	67.4232	0	C1203	74.07	A6802	2.6	A6802	0.01
High	NASEIVKTV	3	1	1	Q9Y3R5		0	5.43124e+06	0.001	0.00298	38.56	0.0562208	2	960.536	-0.0874452	35.8762	0	C1203	92.59	A6802	83.5	A6802	0.7
High	TAYPQVVVV	41	1	1	Q9ULI2		0	2.24647e+08	0.001	0.003192	38.23	0.0644247	2	975.551	-0.291652	68.972	0	C1203	96.3	C1203	11.6	C1203	0.03
High	ETTSISKITV	19	1	1	P51587		0	4.13792e+07	0.001	0.005171	38.18	0.0340907	2	1078.6	-0.136054	46.6854	0	C1203	40	A6802	8.3	A6802	0.06
High	KKFKEVGEAF	2	1	1	Q99615		0	7.59242e+06	0.001	0.00491	37.81	0.0465437	2	1182.65	0.292485	28.7961	0	C1203	40	B1503	14.8	B1503	0.4
High	KQFKSEAY	2	1	1	Q03001		0	6.77052e+06	0.001	0.004939	37.78	0.0671484	2	1000.51	-0.404081	22.1209	0	C1203	33.33	B1503	8.8	B1503	0.17
High	RSYPGLLVV	1	1	1	Q86WG5		0	16978152	0.001	0.004182	37.55	0.035387	2	1003.59	-0.160371	62.1992	0	C1203	85.19	C1203	13.8	C1203	0.04
High	ETMNNIDRL	9	1	1	Q5T0N5		0	4.18493e+07	0.001	0.004227	37.21	0.0713475	2	1105.53	-0.00366594	46.0358	0	C1203	70.37	A6802	45.3	A6802	0.4
High	GKFGITSAF	5	1	1	Q9H015		0	12185018	0.001	0.003266	37.05	0.0750704	2	927.494	0.159146	57.8775	0	C1203	37.04	B1503	4.3	B1503	0.04
High	VAAPQVQQV	21	1	1	Q12772		0	5.70726e+07	0.001	0.004437	37	0.0529742	2	939.525	-0.439665	46.3478	0	C1203	92.59	C1203	74	C1203	0.4
High	ETIIDTKGV	22	1	1	Q9GZS1		0	3.74175e+07	0.001	0.005395	36.98	0.0565361	2	975.535	-0.686312	44.5906	0	C1203	70.37	A6802	10.4	A6802	0.08
High	EAAGIMENI	7	1	1	O60341		0	19672183	0.001	0.002749	36.71	0.0874868	2	947.45	-0.0183161	64.5183	0	C1203	74.07	A6802	6.1	A6802	0.03
High	KGFPHVIYA	21	1	1	Q13485		0	107708948	0.001	0.003773	36.58	0.0757053	2	1031.57	-0.949548	44.0554	0	C1203	18.52	C1203	414.1	C1203	1.5
High	DVSKIFQVV	15	1	1	Q5TF58		0	2.65875e+07	0.001	0.003143	36.48	0.0629173	2	1034.59	-0.648913	74.899	0	C1203	44.44	A6802	44.3	A6802	0.4
High	GKVTGDTVY	8	1	1	Q6UX04		0	30738221	0.001	0.005535	36.47	0.0638739	2	939.478	-0.155786	29.8217	0	C1203	40.74	B1503	16.6	B1503	0.4
High	KAYGASKTF	3	1	1	P27694		0	1.32675e+07	0.001	0.001701	36.38	0.113219	2	972.515	-0.377716	23.3989	0	C1203	81.48	B1503	4.7	B1503	0.05
High	KAYHEQLSV	12	6	6	Q71U36;P68363;Q13748;Q6PEY2;P68366;Q9NY65		0	7.53491e+07	0.001	0.003883	36.33	0.110433	2	1074.56	-0.182879	29.7561	0	C1203	81.48	C1203	48.2	C1203	0.25
High	AAISHGRVF	6	1	1	Q9NRX2		0	2.72934e+07	0.001	0.004776	36.03	0.0924996	2	957.526	-0.621179	29.8482	0	C1203	81.48	B1503	6.2	B1503	0.09
High	RKKPTTEGF	3	1	1	Q03111		0	2.12818e+07	0.001	0.005031	35.89	0.0809738	2	1063.59	-0.685024	19.6875	0	C1203	37.04	B1503	39.5	B1503	1
High	ITADVNHNL	14	1	1	Q16222		0	4.28621e+07	0.001	0.005146	35.8	0.0965834	2	996.51	-0.621965	38.3464	0	C1203	74.07	A6802	22.9	A6802	0.25
High	KSFEAPIKL	26	1	1	Q8TCT9		0	6.25905e+07	0.001	0.00176	35.77	0.0570619	2	1032.61	-0.0475038	48.1421	0	C1203	81.48	C1203	102	C1203	0.5
High	SSFPTVVIY	42	1	1	Q9HCN4		0	4.8392e+08	0.001	0.001833	35.44	0.0866421	2	1012.53	-0.824712	81.629	0	C1203	85.19	B1503	15.2	C1203	0.06
High	FSFPGELLM	26	2	2	P43003;P48664		0	5.84524e+07	0.001	0.00494	35.44	0.107088	2	1040.51	-0.173771	99.2712	0	C1203	77.78	C1203	6.2	C1203	0.01
High	GKAPGAEEY	4	1	1	P09543		0	5.40233e+07	0.001	0.00342	35.36	0.151197	2	921.431	-0.220774	24.9671	0	C1203	51.85	B1503	62.4	B1503	1.4
High	VAIVRPSIV	3	1	1	Q8WVX9		0	1.30662e+07	0.001	0.0018	35.23	0.0139461	2	953.614	-0.294736	53.9189	0	C1203	81.48	C1203	109.1	C1203	0.5
High	IAISRTPVL	14	1	1	Q9H3K2		0	15349649	0.001	0.005326	35.2	0.0356505	2	969.609	-0.705675	53.3245	0	C1203	81.48	C1203	35.6	C1203	0.17
High	EAFHGKFYEA	35	1	1	Q13045		0	1.9566e+08	0.001	0.001928	34.85	0.0758285	2	1198.55	-0.517022	39.0826	0	C1203	42.86	A6802	26.5	A6802	0.25
High	KQIESKTAF	5	1	1	P10599		0	6.16611e+07	0.001	0.003553	34.74	0.0958027	2	1051.58	-0.451619	24.6329	0	C1203	33.33	B1503	2.3	B1503	0.01
High	YASDVQLIL	8	1	1	Q8NHQ8		0	9.27089e+07	0.001	0.003925	34.66	0.112819	2	1021.56	-0.444873	80.4341	0	C1203	88.89	C1203	14.4	C1203	0.05
High	TASKVIVAV	21	1	1	Q8TEM1		0	3.00525e+08	0.001	0.003282	34.65	0.0480903	2	887.556	-0.2902	39.6597	0	C1203	85.19	A6802	18.4	A6802	0.17
High	AAYDKVRKA	3	1	1	Q9NVM6		0	1.15249e+07	0.001	0.002583	34.26	0.0886999	2	1021.58	-0.105048	19.2325	0	C1203	55.56	C1203	200.1	C1203	0.9
High	KKRPKAESF	2	1	1	P13798		0	6.54648e+06	0.001	0.003851	34.12	0.0605865	2	1090.64	-0.71277	17.2455	0	C1203	37.04	B1503	30.1	B1503	0.8
High	ETFQNSVFV	10	1	1	O00767		0	7.74484e+07	0.001	0.001666	34	0.151719	2	1070.51	-0.374701	70.5996	0	C1203	74.07	A6802	3.4	A6802	0.01
High	TTTEITHHGT	4	1	1	P15924		0	5.28919e+07	0.001	0.003161	33.91	0.125225	2	1097.52	-0.276182	19.0207	0	C1203	20	A6802	193.4	A6802	1.2
High	RHKSHDNVY	2	1	1	Q86SQ0		0	4.1708e+06	0.001	0.001855	33.87	0.134424	2	1155.56	-0.356791	16.387	0	C1203	44.44	B1503	15.5	B1503	0.4
High	AAYPEIVAV	7	1	1	Q17RS7		0	2.13726e+07	0.001	0.004627	33.84	0.219741	2	932.509	-0.289343	71.4739	0	C1203	96.3	C1203	14.9	C1203	0.05
High	AAFPGASLY	16	1	1	Q15038		0	1.90124e+07	0.001	0.004778	33.8	0.20979	2	896.451	0.135288	70.4234	0	C1203	88.89	B1503	5.3	C1203	0.01
High	LKKDDSVGY	3	1	1	Q8N766		0	9.84742e+06	0.001	0.00336	33.75	0.121786	2	1024.53	-0.535068	24.4291	0	C1203	44.44	B1503	67.8	B1503	1.4
High	SAYDHVRKT	3	1	1	P27361		0	1.69665e+07	0.001	0.001489	33.64	0.187149	2	1076.55	-0.429278	18.3719	0	C1203	51.85	C1203	264.8	C1203	1.1
High	ETFPANIQV	52	1	1	Q5VYK3		0	9.43169e+08	0.001	0.003816	33.5	0.258607	2	1018.52	-0.59725	71.0836	0	C1203	81.48	A6802	3.5	A6802	0.01
High	HAIKSVKIY	11	1	1	P53618		0	3.89884e+07	0.001	0.00171	33.43	0.0851141	2	1058.63	-0.85778	27.9417	0	C1203	81.48	B1503	24.9	C1203	0.4
High	KAYHEQLTV	15	1	1	Q9BQE3		0	160444984	0.001	0.004573	33.11	0.241736	2	1088.57	0.0207858	29.1452	0	C1203	85.19	C1203	45.5	C1203	0.2
High	FVEWIPNNV	10	8	8	Q9H4B7;Q13885;Q9BVA1;Q13509;P04350;P68371;P07437;Q9BUF5		0	4.29764e+07	0.001	0.005344	32.99	0.206136	2	1117.57	-0.151059	82.9649	0	C1203	44.44	A6802	43.9	A6802	0.4
High	YAFLHRTL	2	2	2	Q9UH17;Q8IUX4		0	1.20232e+07	0.001	0.002584	32.83	0.146638	2	1020.56	-0.422265	45.5905	0	C1203	90	C1203	586.9	C1203	1.9
High	RSYPYAFSV	20	1	1	Q5H9F3		0	3.45789e+07	0.001	0.005376	32.73	0.197094	2	1089.54	-0.305597	58.4608	0	C1203	77.78	C1203	13.9	C1203	0.04
High	KTPDFILQV	17	1	1	Q9Y2V0		0	5.15413e+07	0.001	0.003872	32.6	0.199923	2	1060.6	0.149099	69.7333	0	C1203	77.78	A6802	174.3	C1203	0.9
High	AKKISQLGY	9	1	1	P26196		0	2.88711e+07	0.001	0.001605	32.58	0.0931079	2	1007.59	-0.438712	29.4617	0	C1203	44.44	B1503	89.1	B1503	1.7
High	SVTQIYHAV	18	1	1	P04844		0	4.73436e+07	0.001	0.004604	32.42	0.299601	2	1017.54	-0.267238	44.5435	0	C1203	37.04	A6802	11.8	A6802	0.1
High	MSVHLPFAV	2	1	1	Q9NVA2		0	9.31515e+06	0.001	0.005022	32.26	0.237212	2	1000.53	-0.804351	75.587	0	C1203	70.37	A6802	5.3	A6802	0.03
High	GKSSGPTSLF	5	1	1	Q00839		0	2.09134e+07	0.001	0.001483	32.24	0.242844	2	980.505	0.0275786	44.7484	0	C1203	34.29	B1503	75.7	B1503	1.5
High	MARETWEVL	6	1	1	Q86X10		0	1.22274e+07	0.001	0.001575	32.13	0.257248	2	1134.56	-0.0585907	60.6054	0	C1203	81.48	C1203	56	C1203	0.25
High	NTCPYVHNI	39	1	1	Q9Y2Y1		0	2.77859e+08	0.001	0.00155	31.99	0.163795	2	1060.49	-0.438358	45.7131	0	C1203	70.37	A6802	42.1	A6802	0.4
High	DVIDFTGHAL	2	2	2	P31150;P50395		0	1.31045e+07	0.001	0.004662	31.92	0.26633	2	1087.54	0.0150945	72.113	0	C1203	40	A6802	32.3	A6802	0.3
High	VKAPSSQTF	3	1	1	Q86TC9		0	1.23777e+07	0.001	0.004202	31.74	0.305836	2	964.51	-0.176407	33.0738	0	C1203	48.15	B1503	4.5	B1503	0.04
High	MTSEIHNTV	17	1	1	O43264		0	3.22387e+08	0.001	0.002565	31.69	0.21383	2	1031.48	-0.185971	29.9855	0	C1203	77.78	A6802	2.4	A6802	0.01
High	EVADFLIKA	21	2	2	Q8IWZ3;O75179		0	1.80835e+08	0.001	0.001907	31.65	0.249286	2	1005.56	-0.0709046	65.2839	0	C1203	11.11	A6802	5.8	A6802	0.03
High	EVIWLTQHV	4	1	1	Q9UJW0		0	1.39585e+07	0.001	0.005522	31.56	0.218058	2	1124.61	0.108171	67.5894	0	C1203	37.04	A6802	3.6	A6802	0.01
High	SAAEIYNEV	14	1	1	Q9BVG8		0	3.84732e+07	0.001	0.00161	31.23	0.3088	2	995.468	-0.231312	55.7617	0	C1203	85.19	A6802	5.5	A6802	0.03
High	YTFGRIVIY	10	1	1	Q9UBB9		0	2.39632e+07	0.001	0.002394	31.22	0.258846	2	1131.62	-0.0484217	73.2462	0	C1203	85.19	C1203	5.7	C1203	0.01
High	VAYWRQAGL	4	2	2	Q5VTU8;P56381		0	8.85583e+06	0.001	0.002272	31.16	0.290582	2	1063.57	-1.81225	55.5623	0	C1203	81.48	C1203	82.6	C1203	0.4
High	HTVWIPWNV	17	1	1	Q9P273		0	6.91065e+07	0.001	0.003669	31.05	0.265449	2	1151.6	-0.0211239	80.7625	0	C1203	70.37	A6802	3.7	A6802	0.01
High	YAYDGKDYI	11	16	16	P01892;P30447;P05534;P10316;P01889;P30460;Q04826;P30479;P30480;P30486;P18464;P30490;P30498;Q31610;P30499;P04222		0	2.84914e+07	0.001	0.002569	30.89	0.215815	2	1107.5	0.0956634	51.7928	0	C1203	77.78	C1203	6	C1203	0.01
High	VKLPSGEDY	22	1	1	Q9Y2Z0		0	179704988	0.001	0.005519	30.77	0.39724	2	1007.5	-0.665562	45.8297	0	C1203	48.15	B1503	118.9	B1503	2.5
High	EVMMLTERV	8	1	1	Q9H0S4		0	2.66141e+07	0.001	0.004841	30.58	0.357956	2	1107.55	-0.434331	57.9695	0	C1203	37.04	A6802	6.1	A6802	0.03
High	EAAEVILRV	46	1	1	P78371		0	2.77266e+09	0.001	0.003592	30.46	0.227528	2	999.583	-0.509207	57.6007	0	C1203	88.89	A6802	7.3	A6802	0.05
High	GKAFSQKQY	1	1	1	Q15072		0	4.12823e+06	0.001	0.002074	30.12	0.362494	2	1056.55	-0.242896	21.8514	0	C1203	44.44	B1503	99.7	B1503	1.9
High	SAYPLSVEW	5	1	1	Q13610		0	4.74444e+07	0.001	0.005201	30.11	0.43543	2	1051.51	-0.0706481	83.4408	0	C1203	55.56	C1203	85.8	C1203	0.4
High	LQRATGISF	10	1	1	Q15393		0	1.65609e+07	0.001	0.002001	29.8	0.321311	2	992.552	-0.169908	46.9796	0	C1203	33.33	B1503	2.2	B1503	0.01
High	IKDNVVIVY	16	1	1	Q9Y2T2		0	3.7197e+07	0.001	0.005093	29.73	0.206284	2	1062.62	-0.554561	55.1172	0	C1203	48.15	B1503	44.4	B1503	1.1
High	FAMPYFIQV	5	1	1	Q00610		0	1.96043e+07	0.001	0.005586	29.71	0.413083	2	1115.56	-0.0784623	100.108	0	C1203	88.89	C1203	5.8	C1203	0.01
High	AKAGGFVVGY	2	1	1	Q9HAV4		0	1.2622e+07	0.001	0.002212	29.22	0.425381	2	968.52	-0.288425	48.9734	0	C1203	40	B1503	16.3	B1503	0.4
High	LVSPITGEKI	5	1	1	Q15459		0	2.41885e+07	0.001	0.003161	29.05	0.23428	2	1056.63	0.866598	54.8326	0	C1203	20	A6802	213.1	A6802	1.3
High	TSAAIYHVL	3	1	1	P46977		0	2.05709e+07	0.001	0.001477	29	0.708397	2	974.531	-0.0165445	53.2276	0	C1203	74.07	A6802	38.2	A6802	0.4
High	HQFLQNEY	12	1	1	Q16531		0	70433143	0.001	0.0037	28.72	0.386582	2	1078.49	-0.646146	44.6679	0	C1203	43.33	B1503	24.1	B1503	0.6
High	YGYEHILTL	6	1	1	Q96AX1		0	5.8012e+07	0.001	0.001594	28.63	0.646576	2	1108.57	-0.0387519	68.8202	0	C1203	59.26	C1203	5.3	C1203	0.01
High	EASYLITSV	11	1	1	O60488		0	1.75221e+08	0.001	0.001561	28.59	0.330465	2	982.509	-0.288652	69.701	0	C1203	81.48	A6802	7	A6802	0.04
High	YLAPHVRTL	5	1	1	Q13098		0	1.99541e+07	0.001	0.002231	28.57	0.235458	2	1069.61	-1.40627	39.541	0	C1203	62.96	C1203	9.2	C1203	0.02
High	AMRIGAEVY	19	2	2	P06733;P13929		0	2.75706e+07	0.001	0.001969	28.53	0.45879	2	1009.51	-0.346808	48.4197	0	C1203	44.44	B1503	7.4	B1503	0.12
High	RQLYLSERY	3	1	1	Q5T953		0	1.87227e+07	0.001	0.002998	28.51	0.479511	3	1227.65	-1.33941	39.1274	0	C1203	37.04	B1503	6.5	B1503	0.1
High	ESFEKAYQV	20	1	1	Q86V86		0	76248296	0.001	0.002728	28.49	0.440666	2	1100.52	-0.864458	46.1289	0	C1203	74.07	A6802	6.1	A6802	0.03
High	YQSDPSGNY	3	1	1	P25789		0	1.96314e+07	0.001	0.002121	28.3	0.108862	2	1030.41	-0.414495	36.1879	0	C1203	48.15	B1503	5	B1503	0.05
High	AQLPEKVEY	20	1	1	P51532		0	5.0179e+07	0.001	0.00364	28.16	0.77524	2	1076.56	-0.78243	45.3104	0	C1203	55.56	B1503	11.1	B1503	0.25
High	HVIEKMHHV	2	1	1	Q9BYX4		0	2.19359e+06	0.001	0.003383	28.08	0.604104	2	1129.59	-0.538418	20.2183	0	C1203	40.74	A6802	5.2	A6802	0.02
High	AAINFQPKM	16	1	1	Q96RK4		0	3.49128e+07	0.001	0.001979	27.96	0.638863	2	1019.53	-0.27181	53.2229	0	C1203	70.37	B1503	217.6	C1203	1.2
High	mTNDKTAKV	1	1	1	P46013	M1(Oxidation)	0	1.97951e+06	0.001	0.002648	27.94	0.760646	2	1023.51	-0.250926	16.5266	0	C1203	70.37	A6802	7.4	A6802	0.05
High	TVFEHTFHV	40	1	1	P41250		0	2.03929e+08	0.001	0.00354	27.88	0.516976	2	1116.55	-0.557829	49.4006	0	C1203	44.44	A6802	2.4	A6802	0.01
High	GKWKQISKY	3	1	1	Q9H8X2		0	2.3871e+07	0.001	0.001617	27.73	0.362609	2	1137.64	-0.334394	25.7617	0	C1203	40.74	B1503	69.6	B1503	1.5
High	EVIGKITAL	25	1	1	O43264		0	8.29238e+07	0.001	0.002287	27.65	0.304413	2	943.582	-0.440403	56.1711	0	C1203	44.44	A6802	28.2	A6802	0.3
High	SQLPKLLVY	9	1	1	P11117		0	1.35741e+07	0.001	0.005356	27.59	0.257091	2	1060.64	-0.0745331	67.1161	0	C1203	51.85	B1503	3.3	B1503	0.02
High	GQNKKVMIY	14	2	2	Q14839;Q8TDI0		0	1.51738e+08	0.001	0.002535	27.55	0.428054	2	1080.59	-0.779263	27.2543	0	C1203	40.74	B1503	9.1	B1503	0.17
High	FVVDHVIKI	1	1	1	Q86UV5		0	1.67828e+07	0.001	0.00388	27.53	0.301109	2	1069.64	-0.629365	59.2042	0	C1203	44.44	C1203	17.2	C1203	0.06
High	IKFFTGDVF	4	1	1	Q9UBE0		0	8.74518e+06	0.001	0.005564	27.49	0.725339	2	1073.57	-0.420647	77.5264	0	C1203	37.04	B1503	4.4	B1503	0.04
High	GKKLFGEGY	4	1	1	Q92624		0	1.2332e+07	0.001	0.005495	27.46	0.647899	2	998.531	-0.0361763	35.1266	0	C1203	37.04	B1503	308.1	B1503	4
High	LQQPRSLTY	15	1	1	P22102		0	4.24068e+07	0.001	0.003993	27.39	0.675389	2	1105.6	-0.476119	43.0615	0	C1203	51.85	B1503	2.4	B1503	0.01
High	RHFSKSDSF	1	1	1	Q4FZB7		0	2.90276e+06	0.001	0.001826	27.32	0.677837	2	1110.53	-0.732397	22.4527	0	C1203	37.04	B1503	12	B1503	0.3
High	YVTTSTRTY	8	1	1	P08670		0	4.1625e+07	0.001	0.001491	27.3	0.965678	2	1091.54	-0.31767	30.5458	0	C1203	48.15	B1503	34.5	C1203	0.17
High	EVSFVIHNL	35	2	2	P49903;Q99611		0	3.6611e+08	0.001	0.002814	27.17	0.800756	2	1057.57	-1.189	65.6107	0	C1203	44.44	A6802	6.3	A6802	0.04
High	RAAPFSLEY	16	1	1	Q15181		0	25854174	0.001	0.004118	26.91	0.804835	2	1053.54	-0.103289	59.6444	0	C1203	92.59	B1503	4	B1503	0.03
High	GKVFSRITY	3	1	1	Q5HY98		0	1.41209e+07	0.001	0.002378	26.89	0.579246	2	1070.6	-0.275246	39.1634	0	C1203	44.44	B1503	16	B1503	0.4
High	KEYERAIIF	3	1	1	P27105		0	2.392e+07	0.001	0.001977	26.7	0.643313	2	1168.64	-0.292233	47.6831	0	C1203	40.74	B1503	5	B1503	0.05
High	GKSTSIQSF	9	1	1	P13797		0	2.34242e+07	0.001	0.005205	26.66	0.689507	2	954.489	-0.254728	32.8711	0	C1203	37.04	B1503	11.3	B1503	0.25
High	GQWGGGSHY	12	1	1	B1AH88		0	2.69544e+08	0.001	0.004708	26.6	0.362621	2	948.395	-0.858471	31.7138	0	C1203	40.74	B1503	5	B1503	0.05
High	LQHPNIVGY	8	1	1	Q9BQI3		0	3.97928e+07	0.001	0.002076	26.6	0.71496	2	1040.55	-0.0841933	48.3894	0	C1203	51.85	B1503	3	B1503	0.01
High	AAYYHPSYL	22	1	1	Q14687		0	7.63597e+07	0.001	0.005041	26.58	0.611335	2	1084.51	-0.457679	50.9618	0	C1203	85.19	C1203	6.4	C1203	0.01
High	KKIRDTQKY	2	1	1	Q9GZR2		0	4.67535e+06	0.001	0.005609	26.38	0.360751	2	1179.68	-0.910492	16.9097	0	C1203	37.04	B1503	66.7	B1503	1.4
High	FAYPNRPDVL	32	1	1	Q03518		0	1.06879e+08	0.001	0.002824	26.29	0.95818	2	1191.62	-0.479514	59.249	0	C1203	80	C1203	21.8	C1203	0.08
High	KKNKDNVKF	2	1	1	P63173		0	1.22067e+07	0.001	0.003545	25.97	0.455147	2	1120.65	-0.748966	17.1929	0	C1203	33.33	B1503	66.5	B1503	1.4
High	KAIATTVTY	7	1	1	O43808		0	47810512	0.001	0.004813	25.64	0.477025	2	967.545	-0.458423	37.0306	0	C1203	81.48	B1503	5.1	B1503	0.06
High	RSTKTGTAY	3	1	1	P17844		0	5.91779e+07	0.001	0.00283	25.52	0.959458	2	984.51	-0.74338	17.2222	0	C1203	66.67	B1503	17	B1503	0.5
High	TAFSRLILI	3	1	1	Q6P2Q9		0	1.08538e+07	0.001	0.003565	25.09	0.223789	2	1033.64	-0.296992	77.3431	0	C1203	77.78	C1203	21.7	C1203	0.08
High	AKLPSETIF	2	1	1	P57678		0	2.92557e+07	0.001	0.004729	24.63	1.20798	2	1005.56	-1.21422	57.4006	0	C1203	40.74	B1503	12.6	B1503	0.3
High	GKFDWRQQY	13	1	1	Q8N766		0	2.64139e+07	0.001	0.004831	24.35	1.42542	2	1227.59	0.639376	45.9841	0	C1203	44.44	B1503	19.2	B1503	0.5
High	ETFEHPNVV	34	1	1	Q00534		0	3.59233e+08	0.001	0.003017	24.28	1.23247	2	1071.51	0.0713161	45.6024	0	C1203	81.48	A6802	8.4	A6802	0.06
High	SQARLLTSF	1	1	1	P08195		0	3.22918e+06	0.001	0.001838	23.88	1.2728	2	1022.56	-0.225508	53.6802	0	C1203	33.33	B1503	2.8	B1503	0.01
High	ASFDGRISVY	15	1	1	O94979		0	5.19634e+07	0.001	0.004216	23.81	1.57277	2	1114.55	0.320204	57.1544	0	C1203	80	B1503	29.5	C1203	0.4
High	KKKIPDTVL	4	1	1	P78527		0	1.79667e+07	0.001	0.005333	23.6	0.373003	2	1041.67	-0.270591	25.3048	0	C1203	40.74	B1503	244.3	B1503	3.5
High	RQVGATVEF	17	1	1	Q13432		0	2.99572e+07	0.001	0.002204	23.47	1.90482	2	1006.53	-0.189359	42.9891	0	C1203	40.74	B1503	2.7	B1503	0.01
High	YASSKLLKI	7	1	1	O95067		0	1.52427e+07	0.001	0.002036	23.43	0.390617	2	1022.62	-1.0675	41.5045	0	C1203	81.48	C1203	22.7	C1203	0.09
High	TAMDQVFHV	7	1	1	Q93052		0	1.52852e+07	0.001	0.002203	23.41	1.72268	2	1047.49	0.237033	62.3377	0	C1203	81.48	A6802	8.6	A6802	0.06
High	TTFDKEFLL	13	1	1	O60306		0	3.20524e+07	0.001	0.004541	23.38	1.41226	2	1113.58	-0.668583	71.2771	0	C1203	74.07	A6802	22.5	A6802	0.25
High	GKSTTTGHLIY	6	3	3	P68104;Q05639;Q5VTE0		0	1.63595e+07	0.001	0.001879	23.25	1.96429	2	1177.62	0.0612413	29.2533	0		0	B1503	498.7	B1503	5
High	ETFEKTPVEV	7	1	1	Q15149		0	2.45602e+07	0.001	0.002959	22.83	2.12257	2	1178.59	0.137884	49.2162	0	C1203	57.14	A6802	7.4	A6802	0.05
High	RQIKHMIKY	2	1	1	O15258		0	8.63199e+06	0.001	0.004673	22.77	1.24422	3	1216.7	-0.136856	23.7249	0	C1203	40.74	B1503	3.4	B1503	0.02
High	RQLPGSQRY	2	1	1	Q96BD0		0	6.86161e+06	0.001	0.002621	22.6	2.20283	2	1104.59	-0.582787	25.8089	0	C1203	44.44	B1503	3.1	B1503	0.01
High	KASEWVQQV	5	1	1	P49588		0	4.63332e+07	0.001	0.001743	22.3	2.79907	2	1074.56	-0.655893	43.2117	0	C1203	85.19	C1203	99.9	C1203	0.5
High	RQYPTPFQL	12	1	1	Q8ND82		0	2.05173e+07	0.001	0.003589	22.26	2.13678	2	1149.6	-0.21338	62.6228	0	C1203	51.85	B1503	7.2	B1503	0.12
High	EVFEGREDSI	4	2	2	P43357;P43360		0	1.14557e+07	0.001	0.001578	22.2	2.09329	2	1180.55	-0.188166	46.491	0	C1203	28.57	A6802	54.6	A6802	0.5
High	EIFADPRTV	18	1	1	Q92871		0	78385344	0.001	0.003516	21.84	3.3848	2	1047.55	-0.648232	54.18	0	C1203	51.85	A6802	96.6	A6802	0.8
High	VQENGQRKY	1	2	2	Q9NQ94;A0AV96		0	2.61146e+06	0.001	0.005389	21.34	3.08863	2	1121.57	-0.181552	17.6708	0	C1203	44.44	B1503	51.6	B1503	1.2
High	HKVETFSGVY	12	1	1	P62081		0	2.95613e+07	0.001	0.00528	20.63	3.54421	2	1166.58	-0.251561	38.6549	0	C1203	34.29	B1503	11.8	B1503	0.25
High	GKVKLVVRY	3	1	1	Q9NUP9		0	9.98306e+06	0.001	0.005511	20.43	0.173901	2	1061.68	-0.450779	30.8905	0	C1203	44.44	B1503	95.5	B1503	1.8
High	HSVYIPNKV	27	1	1	Q8TB22		0	2.749e+07	0.001	0.0055	19.78	3.19113	2	1056.58	-0.476837	34.1295	0	C1203	70.37	A6802	20	A6802	0.17
High	RKKAKVDEF	2	2	2	Q96L21;P27635		0	5.39274e+06	0.001	0.005537	19.38	2.07218	2	1120.65	-0.104319	18.283	0	C1203	37.04	B1503	62.2	B1503	1.4
High	KQQNPRLVY	8	1	1	O00764		0	2.92359e+07	0.001	0.003376	19.37	3.5799	2	1145.64	0.127871	28.4239	0	C1203	44.44	B1503	3.3	B1503	0.02
High	TAFKVVRTL	3	1	1	P31327		0	6.91625e+06	0.001	0.004035	19.33	0.910112	2	1034.64	-0.425072	41.1661	0	C1203	88.89	C1203	34	C1203	0.15
High	ETFNTPAmYV	24	7	7	Q9BYX7;P60709;P63261;Q6S8J3;A5A3E0;P0CG38;P0CG39	M8(Oxidation)	0	2.36268e+08	0.001	0.002095	18.87	2.51264	2	1188.52	-0.290268	65.7314	0	C1203	48.57	A6802	4.3	A6802	0.01
High	RKAASLKSNY	3	1	1	P36578		0	1.10228e+07	0.001	0.003102	18.69	3.11856	2	1137.64	-0.341709	19.0413	0	C1203	28.57	B1503	37.6	B1503	0.9
High	YQSPVRVY	11	2	2	Q92503;O43304		0	2.3639e+07	0.001	0.002022	18.54	5.20996	2	1011.53	-0.258032	45.4749	0	C1203	43.33	B1503	6.1	B1503	0.08
High	ELYYRAIQF	3	1	1	Q00610		0	1.30533e+07	0.001	0.003226	18.33	7.3248	2	1202.62	-0.0435492	69.3244	0	C1203	37.04	B1503	144.6	B1503	2.5
High	RKPFGSKMY	1	1	1	A5YKK6		0	12227018	0.001	0.002297	17.62	5.20069	2	1113.59	-0.842252	25.4304	0	C1203	40.74	B1503	88	B1503	1.7
High	KKVEKSKIF	2	1	1	Q9NVP1		0	4.10865e+06	0.001	0.002295	17.53	0.603985	2	1106.69	-0.750786	19.2451	0	C1203	37.04	B1503	19.4	B1503	0.5
High	RAFGIPIRV	34	1	1	P06493		0	652000627	0.001	0.002844	16.59	3.23987	2	1028.64	0.335443	54.5917	0	C1203	88.89	C1203	30	C1203	0.12
High	RKVYNISEF	10	1	1	O60427		0	3.79023e+07	0.001	0.003606	15.08	10.8923	2	1155.61	-0.802696	42.724	0	C1203	37.04	B1503	4.8	B1503	0.05
High	FKFGDQGGF	2	1	1	P49790		0	1.23782e+07	0.001	0.004262	14.13	9.31917	2	1002.47	-0.189795	58.5935	0	C1203	40.74	B1503	16.2	B1503	0.4
High	KKIEDLIKY	2	1	1	O75935		0	2.14307e+07	0.001	0.002081	13.71	3.70909	2	1149.69	-0.459118	42.9656	0	C1203	44.44	B1503	30.6	B1503	0.8
High	HVFDHPWETV	14	1	1	Q9Y3B1		0	3.47155e+07	0.001	0.00444	11.05	28.2999	2	1266.59	-0.0835398	55.5895	0	C1203	37.14	A6802	16.8	A6802	0.15
High	EVFSSFAHA	8	1	1	O60502		0	7.23293e+07	0.002	0.006043	49.13	0.00410219	2	994.463	0.149824	52.5702	0	C1203	7.41	A6802	6.6	A6802	0.04
High	AAYAGGLVL	5	1	1	P09884		0	24479848	0.002	0.006695	46.28	0.0103705	2	834.472	-0.425477	70.0419	0	C1203	88.89	B1503	9.9	C1203	0.06
High	AAASIANIV	15	1	1	P17987		0	2.87924e+07	0.002	0.006655	41.98	0.0311864	2	829.478	0.649587	63.352	0	C1203	85.19	C1203	94.9	C1203	0.5
High	DVAPVSFFL	7	1	1	O14791		0	5.84875e+06	0.002	0.006399	40.46	0.0374731	2	994.525	0.0617344	104.434	0	C1203	48.15	A6802	4.7	A6802	0.01
High	AAYQSVRIL	15	1	1	Q9HAT2		0	1.05498e+08	0.002	0.006885	40.3	0.023616	2	1020.58	-0.383847	51.7746	0	C1203	88.89	C1203	33	C1203	0.15
High	EVISKLYAV	61	1	1	P50990		0	2.2506e+09	0.002	0.007268	39.44	0.0158187	2	1021.59	-0.995335	57.5858	0	C1203	40.74	A6802	3	A6802	0.01
High	NTIPLFVQL	26	2	2	P35222;P14923		0	1.79072e+08	0.002	0.00666	38.38	0.0512813	2	1044.61	-0.154243	95.0729	0	C1203	77.78	A6802	11.3	A6802	0.09
High	FTITPPTAQV	20	1	1	P52907		0	4.5021e+07	0.002	0.006942	37.91	0.0831127	2	1074.58	-0.431954	71.4729	0	C1203	51.43	A6802	7.3	A6802	0.05
High	TAFPKPLLT	16	1	1	Q9BZG8		0	4.34531e+07	0.002	0.007176	37.83	0.0510271	2	987.587	-0.867655	56.9473	0	C1203	55.56	C1203	345.5	C1203	1.3
High	SAIPHPLIM	31	1	1	P61201		0	1.64477e+08	0.002	0.006398	37.45	0.0231515	2	978.542	-2.22019	59.7262	0	C1203	81.48	C1203	11.7	C1203	0.03
High	KQFQSPSTL	14	1	1	Q8NAP3		0	1.50274e+07	0.002	0.006849	37.43	0.0799132	2	1035.55	-0.990071	37.5139	0	C1203	48.15	B1503	3.6	B1503	0.03
High	NAMDVVVQF	14	1	1	O95870		0	2.42199e+07	0.002	0.00683	37.38	0.0810031	2	1022.5	-0.950292	81.1646	0	C1203	77.78	B1503	92.9	C1203	0.5
High	HGIDPTGTY	14	3	3	P04350;P68371;P07437		0	3.99477e+07	0.002	0.0074	36.87	0.0722132	2	960.442	-0.0375499	38.5726	0	C1203	44.44	B1503	42.3	C1203	0.4
High	GKRKSDTEF	2	1	1	O94782		0	7.30841e+06	0.002	0.005828	36.69	0.0768869	2	1067.55	-0.485552	17.3541	0	C1203	33.33	B1503	41.9	B1503	1
High	SVAVIHQSL	3	1	1	Q9BV87		0	8.71316e+06	0.002	0.006426	36.31	0.0431048	2	953.541	-0.896996	42.0319	0	C1203	40.74	A6802	190.3	A6802	1.2
High	KQAEIVKRL	5	3	3	Q08117;Q04725;Q04727		0	4.57356e+07	0.002	0.00633	35.96	0.0233866	2	1084.68	-1.34853	24.0293	0	C1203	51.85	B1503	55.4	B1503	1.2
High	EIASITEQL	30	1	1	Q5UIP0		0	1.18605e+08	0.002	0.00692	35.62	0.115242	2	1003.53	-0.217426	68.364	0	C1203	44.44	A6802	9	A6802	0.06
High	AAANVVRNI	1	1	1	P28065		0	6.37042e+06	0.002	0.007224	35.53	0.0507035	2	927.537	0.00500098	34.8683	0	C1203	81.48	C1203	131.6	C1203	0.6
High	KLAPPSSTL	8	1	1	Q7Z3B3		0	2.88457e+07	0.002	0.006247	35.01	0.0789067	2	913.534	-1.69809	39.0861	0	C1203	51.85	B1503	63	C1203	1.2
High	HTINGHNAEV	10	1	1	P22626		0	4.61786e+08	0.002	0.006215	34.99	0.12225	2	1091.52	-0.453343	22.8507	0	C1203	45.71	A6802	16.9	A6802	0.15
High	KATAYILSV	21	1	1	P01106		0	5.58546e+07	0.002	0.007065	34.2	0.0485312	2	965.566	-0.194136	56.0045	0	C1203	81.48	C1203	52.2	C1203	0.25
High	AATEIVERV	24	1	1	Q9UID3		0	3.78611e+07	0.002	0.007042	33.69	0.188961	2	987.546	-0.811226	41.6764	0	C1203	85.19	A6802	351.2	A6802	1.8
High	KKKSPASTF	2	1	1	Q86U70		0	8.13769e+06	0.002	0.006697	33.64	0.0875624	2	993.572	-0.614094	17.8323	0	C1203	37.04	B1503	7.4	B1503	0.12
High	IAFEFPVLV	12	1	1	Q8TDN4		0	1.32814e+07	0.002	0.00686	33.64	0.110832	2	1034.59	-0.532545	104.243	0	C1203	88.89	C1203	10.1	C1203	0.03
High	GKSSVIQVF	7	1	1	Q8WVC6		0	2.80232e+07	0.002	0.007376	33.6	0.120762	2	964.546	-9.12023e-05	52.0126	0	C1203	44.44	B1503	11.5	B1503	0.25
High	THRSGQGAF	1	1	1	P36578		0	4.70025e+06	0.002	0.007203	33.18	0.203371	2	960.464	-0.502229	18.2764	0	C1203	33.33	B1503	73.8	B1503	1.5
High	FTSSRHTVV	4	1	1	Q9NZ01		0	7.58309e+07	0.002	0.007207	32.97	0.224347	2	1033.54	-0.967349	23.9533	0	C1203	81.48	C1203	12.9	C1203	0.04
High	MRYVASYLL	17	1	1	P05387		0	4.95462e+07	0.002	0.00628	32.88	0.228968	2	1115.59	0.0297365	67.7078	0	C1203	40.74	B1503	28.5	C1203	0.4
High	KQLPESESF	1	1	1	Q8NI35		0	9.20762e+06	0.002	0.005765	32.78	0.252042	2	1064.52	-1.01776	38.9951	0	C1203	37.04	B1503	4.6	B1503	0.04
High	GAYEQVIKY	17	1	1	P98194		0	8.0286e+07	0.002	0.007106	32.62	0.217959	2	1070.55	-0.482219	50.2223	0	C1203	88.89	B1503	35.1	C1203	0.5
High	LSADIFQQV	5	1	1	O94916		0	5.52227e+07	0.002	0.006707	32.54	0.285725	2	1020.54	-0.680374	78.1811	0	C1203	74.07	A6802	15.5	A6802	0.15
High	SKKPESTSF	4	1	1	Q9BT25		0	1.90656e+07	0.002	0.006828	32.08	0.188248	2	1010.51	-0.75935	20.5659	0	C1203	37.04	B1503	11.3	B1503	0.25
High	NAFPEIFYT	3	1	1	Q99570		0	3.13818e+07	0.002	0.007264	32.07	0.192066	2	1101.52	-0.200956	88.2916	0	C1203	51.85	A6802	147.1	A6802	1
High	AAATSVHVV	8	1	1	Q68EM7		0	2.82151e+07	0.002	0.006071	31.55	0.209393	2	854.473	0.129706	30.2844	0	C1203	88.89	C1203	118.5	C1203	0.6
High	GKVPVVVSY	12	1	1	Q9Y4C4		0	1.6094e+07	0.002	0.007085	31.52	0.183608	2	947.556	-0.261271	48.354	0	C1203	51.85	B1503	14.5	B1503	0.4
High	ETADVIAKV	60	1	1	O43617		0	2.28694e+09	0.002	0.006961	31.44	0.281591	2	945.524	-0.836228	42.8896	0	C1203	77.78	A6802	2	A6802	0.01
High	GKTISLTDF	7	1	1	P23588		0	6.15093e+06	0.002	0.007075	31.21	0.178764	2	981.524	-0.919737	59.1576	0	C1203	29.63	B1503	86.5	B1503	1.7
High	RQIDQFLVV	6	2	2	O94776;Q9BTC8		0	6.01172e+07	0.002	0.006244	31.17	0.214867	2	1117.64	-0.172894	67.1937	0	C1203	48.15	B1503	8.7	B1503	0.17
High	KAFARPWSL	3	1	1	Q8NAF0		0	3.10609e+07	0.002	0.005778	30.85	0.238985	2	1075.6	-0.565008	48.2974	0	C1203	81.48	C1203	29	C1203	0.12
High	TTFDHQNSENV	3	1	1	Q9Y2D8		0	1.23931e+07	0.002	0.006688	30.48	0.120964	2	1291.55	-0.0883671	31.5947	0		0	A6802	128.5	A6802	0.9
High	AKIVPKISY	7	1	1	Q7Z417		0	1.70147e+08	0.002	0.006659	30.3	0.082733	2	1018.63	-1.03541	40.2874	0	C1203	44.44	B1503	22.9	B1503	0.6
High	ETFSSYISV	11	1	1	A5PLN9		0	5.66353e+07	0.002	0.006526	30.29	0.328234	2	1032.49	-0.345371	75.8387	0	C1203	77.78	A6802	3	A6802	0.01
High	MALGHVIVL	2	1	1	Q9NVR2		0	1.89206e+07	0.002	0.006791	29.89	0.100719	2	952.565	-0.345951	68.8571	0	C1203	88.89	C1203	18.4	C1203	0.07
High	DVATITKTV	7	1	1	P57740		0	1.41575e+07	0.002	0.006905	29.85	0.228094	2	947.541	-0.0773075	44.8507	0	C1203	48.15	A6802	20.2	A6802	0.2
High	AAYLRALSL	6	1	1	O15294		0	6.18374e+06	0.002	0.007356	29.6	0.192103	2	977.577	-0.451241	63.6235	0	C1203	85.19	C1203	35.5	C1203	0.17
High	DVSNPQTVGV	4	1	1	O60493		0	6.08998e+07	0.002	0.006644	29.57	0.368597	2	1015.51	-0.451813	51.1767	0	C1203	28.57	A6802	45	A6802	0.4
High	EVFLKAFAV	10	1	1	O95373		0	1.18316e+07	0.002	0.007433	29.57	0.230697	2	1023.59	-0.310251	73.4631	0	C1203	40.74	A6802	5.6	A6802	0.03
High	HAAPFSKVL	3	2	2	Q92598;P34932		0	1.35848e+07	0.002	0.005854	29.24	0.262669	2	969.552	0.075371	37.2128	0	C1203	92.59	C1203	26.9	C1203	0.12
High	EVISGKQEGV	5	2	2	Q9Y227;Q9NQZ7		0	2.03124e+07	0.002	0.006055	28.66	0.625992	2	1045.55	-0.16987	29.98	0	C1203	28.57	A6802	35.8	A6802	0.4
High	FAYDGKDYI	10	11	11	P30462;P18463;Q95365;P30475;Q29836;Q31612;P30504;Q9TNN7;P30505;Q95604;Q29865		0	4.151e+07	0.002	0.006288	28.46	0.4465	2	1091.5	-0.325588	60.1364	0	C1203	77.78	C1203	5.5	C1203	0.01
High	EVDPNIQAV	14	1	1	P05787		0	5.08679e+07	0.002	0.006623	28.27	0.509436	2	984.5	0.0417704	54.7844	0	C1203	48.15	A6802	90.4	A6802	0.7
High	DTATAHSWFV	11	1	1	Q13425		0	2.80163e+07	0.002	0.007414	28.21	0.423275	2	1134.52	0.035851	64.1949	0	C1203	40	A6802	10.6	A6802	0.08
High	RAYPAAITI	27	1	1	O95071		0	2.33867e+08	0.002	0.007357	28.16	0.460561	2	975.562	-0.61424	53.2042	0	C1203	85.19	C1203	9.5	C1203	0.02
High	HVGDIIKEV	30	2	2	Q14168;Q9NZW5		0	1.21932e+08	0.002	0.006661	27.61	0.406924	2	1009.57	-0.771786	44.0754	0	C1203	51.85	A6802	232.4	A6802	1.4
High	GKNPDEVSY	6	1	1	O95391		0	5.48842e+07	0.002	0.006909	27.48	0.722992	2	1008.46	0.0636313	28.7096	0	C1203	48.15	B1503	70	B1503	1.5
High	VAINHIVDF	10	1	1	P78346		0	3.785e+07	0.002	0.006718	27.31	0.615862	2	1027.56	-0.0942676	64.5019	0	C1203	77.78	B1503	12.9	B1503	0.3
High	AKKKANLQY	2	1	1	P17980		0	8.8761e+06	0.002	0.007364	27.29	0.295261	2	1063.63	0.0101454	18.327	0	C1203	44.44	B1503	39.4	B1503	1
High	LQAPPLTSL	10	1	1	Q96EX3		0	1.10433e+07	0.002	0.006014	27.23	0.311953	2	939.551	-0.313471	72.9798	0	C1203	48.15	B1503	6.8	B1503	0.12
High	QKFLQGLVY	18	1	1	Q5J8M3		0	7.4553e+07	0.002	0.007125	26.67	0.504181	2	1095.62	-0.281973	65.485	0	C1203	48.15	B1503	7	B1503	0.12
High	STAAVFHAV	1	1	1	P57723		0	13650142	0.002	0.006368	26.57	1.16359	2	902.473	-0.418241	42.884	0	C1203	70.37	A6802	2.1	A6802	0.01
High	AAYGRSPmV	7	1	1	Q04726	M8(Oxidation)	0	1.775e+06	0.002	0.007278	26.26	0.63312	2	967.467	0.0993351	29.7125	0	C1203	85.19	C1203	34.4	C1203	0.15
High	SAYANAKKY	3	1	1	O60524		0	6.21771e+06	0.002	0.006336	26.22	1.01661	2	1015.52	-0.844174	20.9835	0	C1203	81.48	C1203	27.9	C1203	0.12
High	QVFPGLLERV	6	1	1	Q9UBB4		0	3.21065e+07	0.002	0.006963	26.12	0.637369	2	1157.67	0.203036	72.0435	0	C1203	40	A6802	53.3	A6802	0.5
High	EVSRISEVL	12	1	1	Q07065		0	2.94768e+07	0.002	0.005957	26.08	0.948069	2	1031.57	-0.269224	51.777	0	C1203	44.44	A6802	31.7	A6802	0.3
High	DVIYPMAVV	8	1	1	P78406		0	7.28087e+07	0.002	0.006118	25.95	1.17406	2	1006.53	0.0480166	88.7033	0	C1203	40.74	A6802	9.5	A6802	0.07
High	KIYEPPRYM	11	1	1	Q9H2P9		0	3.34272e+07	0.002	0.006235	25.95	0.873459	2	1196.61	-0.77637	42.516	0	C1203	44.44	C1203	53.6	C1203	0.25
High	VKLGPAKSY	4	1	1	Q8ND04		0	3.31726e+06	0.002	0.005747	25.91	0.547774	2	962.566	-0.674781	26.978	0	C1203	48.15	B1503	17.5	B1503	0.5
High	TTFEHDIQAL	15	1	1	Q01082		0	7.42806e+07	0.002	0.006685	25.45	1.15523	2	1174.57	-0.433726	58.3971	0	C1203	57.14	A6802	138.6	A6802	1
High	SAFPEVRSL	28	1	1	Q6YHU6		0	4.82388e+07	0.002	0.006066	25.19	1.31202	2	1005.54	1.15652	56.5654	0	C1203	92.59	C1203	16.9	C1203	0.06
High	KKLDLISEL	5	1	1	Q2M389		0	1.6113e+07	0.002	0.006995	24.93	0.380497	2	1058.65	1.53318	56.3035	0	C1203	48.15	B1503	109	B1503	2
High	YVFPGVTRL	4	1	1	Q9H0A9		0	8.17301e+06	0.002	0.00673	24.79	0.77431	2	1051.59	-0.675417	66.5126	0	C1203	55.56	C1203	5.9	C1203	0.01
High	EVSQVKETL	12	1	1	P30622		0	1.6714e+08	0.002	0.006881	24.66	1.15999	2	1032.56	-0.624805	35.0141	0	C1203	44.44	A6802	88.6	A6802	0.7
High	YTTDRVMTV	3	2	2	Q13547;Q92769		0	23695846	0.002	0.006797	24.66	1.16769	2	1085.53	-0.58316	43.6868	0	C1203	81.48	C1203	6.7	C1203	0.01
High	HKIDKSHEF	2	1	1	Q9NWV8		0	1.19794e+07	0.002	0.006957	24.15	1.26858	2	1140.58	-0.671834	18.8066	0	C1203	37.04	B1503	24	B1503	0.6
High	TVFDEAIRA	7	3	3	P63000;P15153;P60763		0	1.19396e+07	0.002	0.006817	24.1	1.85555	2	1021.53	0.255963	55.3741	0	C1203	11.11	A6802	144.3	A6802	1
High	ISPSHIWIF	8	1	1	O94915		0	2.1128e+07	0.002	0.006778	24.03	1.00225	2	1099.59	-0.201877	79.4076	0	C1203	66.67	B1503	394.8	C1203	3
High	DTFDKNYKA	6	1	1	Q9BZG1		0	4.90139e+07	0.002	0.007313	23.31	1.48468	2	1101.52	-0.430149	28.941	0	C1203	37.04	A6802	23.9	A6802	0.25
High	GKGKFGNVY	3	3	3	O14965;Q96GD4;Q9UQB9		0	2.99108e+07	0.002	0.007329	23.29	1.61131	2	969.515	-0.288895	26.6002	0	C1203	40.74	B1503	27.1	B1503	0.7
High	STYDKIRII	3	1	1	P61764		0	5.89855e+06	0.002	0.006341	23.21	0.805114	2	1108.63	-1.51022	48.655	0	C1203	74.07	C1203	35.2	C1203	0.15
High	KHMTVKNKY	1	1	1	P14635		0	3936229	0.002	0.006509	23.2	1.31312	2	1148.62	-0.170746	17.3604	0	C1203	37.04	B1503	101.8	B1503	1.9
High	AAFEKALEV	15	1	1	Q13325		0	3.2103e+07	0.002	0.007168	22.95	2.4546	2	977.53	-0.209103	52.8954	0	C1203	92.59	C1203	13.1	C1203	0.04
High	RQSPHSNLF	6	1	1	O43929		0	7.49201e+06	0.002	0.007329	22.56	2.05184	2	1085.55	-0.963826	26.7951	0	C1203	40.74	B1503	2.1	B1503	0.01
High	EQYESFVKF	5	1	1	Q9H9L7		0	1.25065e+07	0.002	0.006875	22.17	2.08414	2	1176.56	-0.332331	64.9215	0	C1203	40.74	B1503	6.2	B1503	0.09
High	SKTGGYLVY	16	1	1	P46087		0	4.27841e+07	0.002	0.007001	22.06	3.11679	2	987.514	-0.264781	45.4825	0	C1203	48.15	B1503	7.4	B1503	0.12
High	ETFDFVHNV	23	1	1	Q96E29		0	8.67128e+07	0.002	0.007033	21.58	2.42181	2	1107.51	0.289439	64.0878	0	C1203	77.78	A6802	1.9	A6802	0.01
High	EAFDRSFEV	24	1	1	Q7Z4W1		0	2.69568e+08	0.002	0.006243	21.54	1.99178	2	1099.51	-0.0933215	58.0444	0	C1203	85.19	A6802	4	A6802	0.01
High	AQPETRVSY	7	1	1	Q5SWA1		0	46395480	0.002	0.007062	21.4	3.0448	2	1050.52	-0.532762	31.4931	0	C1203	48.15	B1503	10.6	B1503	0.25
High	HAAELIKTV	16	1	1	Q8WUM4		0	2.83462e+07	0.002	0.006622	20.97	1.30293	2	981.572	-0.435058	33.0003	0	C1203	92.59	C1203	37	C1203	0.17
High	RKYHQRPTF	2	1	1	O75369		0	9.10945e+06	0.002	0.006815	20.83	3.19346	3	1232.66	-0.391071	20.9467	0	C1203	37.04	B1503	5.6	B1503	0.07
High	THLKPGTLY	7	1	1	Q53EP0		0	79925844	0.002	0.007052	20.68	3.6755	2	1029.57	-0.573196	32.2562	0	C1203	37.04	B1503	35.2	B1503	0.9
High	RTTDIVIRI	13	1	1	Q9C0C9		0	1.08319e+08	0.002	0.006572	20.65	1.18645	2	1086.66	-0.121385	50.0258	0	C1203	70.37	A6802	375.8	C1203	1.4
High	AMRPGLEGY	2	1	1	P33992		0	6.58201e+06	0.002	0.006429	20.41	2.63056	2	993.481	-1.40792	43.7633	0	C1203	48.15	B1503	14.7	B1503	0.4
High	RKNPVTSTY	4	1	1	Q13131		0	9.19802e+07	0.002	0.007031	20.01	3.49395	2	1065.57	-0.447082	23.8944	0	C1203	48.15	B1503	5.4	B1503	0.06
High	KLKEFVDYY	3	1	1	O75151		0	5.18462e+07	0.002	0.007028	19.71	4.58571	2	1204.62	0.0367155	65.5616	0	C1203	44.44	B1503	47.1	B1503	1.1
High	KKRENDKVKY	2	1	1	Q9UKG1		0	4.59711e+06	0.002	0.006313	19.57	2.18332	3	1307.74	-0.128665	16.2012	0	C1203	28.57	B1503	270.9	B1503	3.5
High	ETIPLTAEKL	13	1	1	P24385		0	5.9194e+07	0.002	0.006655	19.12	3.31626	2	1114.63	-0.590396	57.7341	0	C1203	51.43	A6802	13.7	A6802	0.12
High	KKIEFGVVY	6	1	1	P29218		0	1.59705e+07	0.002	0.007289	18.63	2.80345	2	1082.62	-1.52497	47.9245	0	C1203	48.15	B1503	3.5	B1503	0.03
High	NIPSFIVRL	4	1	1	P46781		0	1.69629e+07	0.002	0.00621	18.27	2.79851	2	1058.64	-0.0695084	77.2939	0	C1203	48.15	A6802	74.4	A6802	0.6
High	YIKDFFEQM	1	1	1	Q5U649		0	2.53125e+07	0.002	0.006704	18.1	4.94924	2	1220.57	0.14108	72.4773	0	C1203	37.04	C1203	55.3	C1203	0.25
High	HHVIARHEY	1	1	1	Q8WUH1		0	3.36847e+06	0.002	0.007367	17.82	7.77909	2	1161.59	0.116127	19.207	0	C1203	40.74	B1503	39.8	B1503	1
High	HVVGPVHAV	1	1	1	Q8IZD2		0	7.23575e+06	0.002	0.006537	17.69	5.22392	2	914.52	-0.226265	26.3572	0	C1203	44.44	A6802	4.8	A6802	0.02
High	QGFPNRVVF	41	1	1	P35579		0	2.36228e+08	0.002	0.0068	17.04	7.1764	2	1063.57	-0.100037	58.7698	0	C1203	48.15	B1503	44.9	B1503	1.1
High	RKGEFETGF	2	2	2	P15170;Q8IYD1		0	6.43324e+06	0.002	0.006802	16.66	7.56613	2	1070.53	-0.0508567	35.1942	0	C1203	33.33	B1503	71	B1503	1.5
High	FSQDHLVIY	10	1	1	Q9BW91		0	4.17453e+07	0.002	0.006721	16.38	10.6511	2	1121.56	-1.03635	59.8473	0	C1203	77.78	C1203	13.8	C1203	0.04
High	YKVPDGMVGF	3	1	1	Q96AE4		0	0	0.002	0.007191	15.41	10.7643	2	1112.54	-0.611624	66.2281	0	C1203	34.29	B1503	18.3	B1503	0.5
High	GKAFSQSAY	1	3	3	Q6ZN57;O14709;Q9NQZ8		0	3.50577e+06	0.002	0.007314	14.71	12.4171	2	958.462	-0.470918	30.7486	0	C1203	40.74	B1503	12.5	B1503	0.3
High	RLLLPVAEY	1	1	1	O00541		0	2.04457e+06	0.002	0.006818	14.31	8.92599	2	1073.63	-0.434045	67.186	0	C1203	44.44	B1503	12.5	B1503	0.3
High	DSFYVHHDI	1	1	1	Q13610		0	6.06444e+06	0.002	0.006037	13.63	8.66805	2	1132.51	-0.678865	43.7371	0	C1203	62.96	A6802	62.1	A6802	0.6
High	HTMDPQLRL	6	1	1	P49327		0	2.80538e+07	0.002	0.006649	12.9	14.5268	2	1110.57	0.169403	43.314	0	C1203	74.07	A6802	87.4	C1203	0.5
High	EDFFARNSYV	2	1	1	P11413		0	7.50754e+06	0.002	0.006422	12.34	17.2583	2	1247.57	0.267966	63.0043	0	C1203	31.43	A6802	258.4	A6802	1.5
High	HTFYNELRV	14	10	10	Q562R1;Q9BYX7;P60709;P68032;P63261;P68133;Q6S8J3;A5A3E0;P0CG38;P0CG39		0	5.44614e+07	0.002	0.00623	10.66	34.6612	2	1178.59	-0.455745	47.7206	0	C1203	74.07	A6802	11.1	A6802	0.09
High	AAFDGGFTV	3	1	1	Q86WA8		0	12540771	0.003	0.01005	48.22	0.00636993	2	884.415	-0.284804	71.8796	0	C1203	88.89	C1203	14.7	C1203	0.05
High	GQRKGAGSVF	8	1	1	P62917		0	1.66572e+08	0.003	0.008313	47.23	0.00639139	2	1006.54	-1.04776	22.7717	0	C1203	42.86	B1503	9.8	B1503	0.2
High	FSETVITSV	16	1	1	Q9UBP4		0	1.75221e+08	0.003	0.007611	43.8	0.0127166	2	982.509	0.0117782	69.7508	0	C1203	74.07	C1203	65.1	C1203	0.3
High	AAFDKIQQL	15	1	1	Q9P2I0		0	3.96734e+07	0.003	0.01184	41.79	0.0262304	2	1033.57	-0.871971	54.516	0	C1203	88.89	C1203	26.1	C1203	0.1
High	AVAAVLTQV	4	1	1	Q99720		0	3.92472e+06	0.003	0.007966	39.63	0.0338058	2	871.525	0.111996	63.2567	0	C1203	44.44	A6802	23.4	A6802	0.25
High	ETFFGVQWV	2	1	1	P32970		0	1.46315e+07	0.003	0.007618	39.49	0.0373031	2	1112.54	-0.206866	99.9418	0	C1203	74.07	A6802	4.1	A6802	0.01
High	GQKPGGSDF	7	2	2	P56211;O43768		0	2.71775e+08	0.003	0.009606	38.7	0.0452577	2	892.415	-1.05968	24.1627	0	C1203	37.04	B1503	11.1	B1503	0.25
High	GVVDIFQTV	15	2	2	P23468;Q13332		0	8.29107e+07	0.003	0.008694	38.31	0.0714463	2	977.53	-0.198873	86.5178	0	C1203	44.44	A6802	54.5	A6802	0.5
High	NAYTGIVLL	2	1	1	Q969H6		0	2.79065e+07	0.003	0.01086	36.44	0.0649862	2	963.551	-0.485317	84.5686	0	C1203	85.19	C1203	38.2	C1203	0.17
High	DASEIQVQV	16	1	1	P18858		0	12069289	0.003	0.01032	35.95	0.11118	2	988.494	-0.242764	63.003	0	C1203	85.19	A6802	33.3	A6802	0.4
High	IQTRGGTF	5	1	1	O14672		0	1.44068e+07	0.003	0.008537	35.85	0.103226	2	879.469	0.322005	27.6965	0	C1203	26.67	B1503	45.7	B1503	1.1
High	GKYASIILF	23	1	1	Q8TCB0		0	7.02678e+07	0.003	0.007828	35.85	0.0505991	2	1011.59	-0.113152	72.0022	0	C1203	40.74	B1503	5.6	B1503	0.07
High	MATPLLMQA	8	1	1	P04233		0	1.97627e+07	0.003	0.007645	35.8	0.124491	2	975.5	0.166591	72.6427	0	C1203	44.44	A6802	113.4	C1203	0.6
High	HASDRIIAL	1	1	1	P29401		0	6.65014e+06	0.003	0.008646	35.27	0.0670705	2	995.563	-0.389217	39.7599	0	C1203	88.89	C1203	17.5	C1203	0.06
High	EVFGHAIKA	23	1	1	P54136		0	9.26024e+07	0.003	0.01064	34.42	0.12615	2	971.531	-0.0730263	33.9648	0	C1203	11.11	A6802	17.5	A6802	0.17
High	KKNPSSPLY	3	1	1	O95478		0	2.06725e+07	0.003	0.008685	34.22	0.149542	2	1033.57	-0.616409	24.4185	0	C1203	44.44	B1503	9.4	B1503	0.17
High	GKAFSQSSY	4	3	3	Q9UNY5;Q8NF99;Q9NQZ8		0	1.87268e+07	0.003	0.01172	34.21	0.135529	2	974.457	-0.62638	29.7908	0	C1203	40.74	B1503	14.1	B1503	0.4
High	ELFSGGNTGI	3	2	2	O00571;O15523		0	1.23542e+07	0.003	0.008222	32.54	0.254829	2	994.484	0.00511603	65.3634	0	C1203	25.71	A6802	297.4	A6802	1.6
High	KATNVVRLL	21	1	1	Q9NYU1		0	1.67255e+08	0.003	0.01168	32.52	0.0518895	2	1013.65	-1.37234	39.5237	0	C1203	81.48	C1203	80.7	C1203	0.4
High	KKSDPVVSY	9	1	1	P13639		0	5.49338e+08	0.003	0.008068	32.5	0.178234	2	1022.55	-0.87277	26.0799	0	C1203	51.85	B1503	9.1	B1503	0.17
High	KANPGAWIL	18	2	2	Q9NYU2;Q9NYU1		0	1.05414e+08	0.003	0.009473	32.47	0.10634	2	969.55	-1.76055	59.3766	0	C1203	81.48	B1503	352.7	C1203	1.4
High	ETAQAIKGMHI	11	1	1	P18621		0	3.44594e+07	0.003	0.01025	31.61	0.239858	2	1198.62	-1.12508	41.007	0		0	A6802	475	A6802	2.5
High	RALALVVTL	11	1	1	O00622		0	6.176e+07	0.003	0.0115	31.5	0.0406361	2	955.63	-0.256406	68.7986	0	C1203	85.19	B1503	40.2	C1203	0.6
High	TTVEDLGSKI	4	1	1	P35613		0	1.73667e+07	0.003	0.00956	30.76	0.309341	2	1062.57	-0.559992	51.6146	0	C1203	31.43	A6802	91	A6802	0.7
High	GKIIKPLQY	22	1	1	Q13823		0	4.29962e+07	0.003	0.01098	30.63	0.0717491	2	1059.66	-0.534252	38.2233	0	C1203	44.44	B1503	92.9	B1503	1.8
High	GKMNPQSAF	3	1	1	P22307		0	1.45844e+07	0.003	0.007998	30.42	0.232402	2	979.465	-1.58949	35.6392	0	C1203	29.63	B1503	6	B1503	0.08
High	LKSVNELIY	7	1	1	P18124		0	94678867	0.003	0.01026	30.35	0.176672	2	1078.61	-0.806944	57.3127	0	C1203	44.44	B1503	15.1	B1503	0.4
High	HSAEILAEI	33	1	1	Q6FI81		0	7.45599e+08	0.003	0.008684	30.24	0.283303	2	982.52	-0.743375	56.8556	0	C1203	70.37	A6802	5.3	A6802	0.03
High	YTFFTPNNI	34	1	1	P17844		0	5.0449e+08	0.003	0.009401	30.23	0.314401	2	1116.54	-0.658628	81.4864	0	C1203	70.37	A6802	11.5	C1203	0.04
High	GKAFSRISY	5	2	2	Q8WV37;Q3KP31		0	1.54366e+07	0.003	0.0118	28.99	0.423091	2	1028.55	-0.569625	34.0499	0	C1203	44.44	B1503	12.6	B1503	0.3
High	TTFPRPVTV	104	1	1	Q15233		0	3.62232e+09	0.003	0.007551	28.71	0.527308	2	1017.57	-0.959497	50.5142	0	C1203	88.89	C1203	11.7	C1203	0.03
High	EKWGGNKTY	1	1	1	P54577		0	2.64417e+06	0.003	0.01193	28.36	0.51394	2	1082.53	-0.370111	25.483	0	C1203	48.15	B1503	98.8	B1503	1.8
High	HNAGISFSV	19	1	1	P40692		0	8.99661e+07	0.003	0.01185	28.22	0.605656	2	931.463	-0.25985	51.2798	0	C1203	44.44	A6802	23	A6802	0.25
High	EVAPSFGTL	15	1	1	Q5SRE5		0	7.95905e+07	0.003	0.007662	28.21	0.873279	2	920.473	0.108035	69.7694	0	C1203	51.85	A6802	10.3	A6802	0.08
High	RKVKNSQSF	2	1	1	P54920		0	1.19549e+07	0.003	0.008902	28.06	0.350927	2	1093.61	0.17053	17.5009	0	C1203	29.63	B1503	5.1	B1503	0.06
High	TVADKIHSV	3	1	1	O95147		0	8.28072e+06	0.003	0.008018	27.89	0.455641	2	969.536	-0.489955	28.3751	0	C1203	48.15	A6802	5.1	A6802	0.02
High	EAADVWYNL	3	1	1	Q8TAM2		0	2.04062e+07	0.003	0.01014	27.74	0.574465	2	1080.5	-0.348101	81.9228	0	C1203	81.48	A6802	8.6	A6802	0.06
High	LSKDGVLYV	17	1	1	Q9H1A4		0	9.51474e+07	0.003	0.0118	27.66	0.36036	2	993.561	-0.358785	51.5325	0	C1203	77.78	C1203	67.2	C1203	0.3
High	YTTTIEAFI	1	1	1	P07814		0	3.47035e+07	0.003	0.008616	27.56	0.627363	2	1058.54	-0.372814	84.9741	0	C1203	62.96	A6802	6	A6802	0.03
High	ELANLYHHV	4	1	1	Q8TD16		0	2.4743e+07	0.003	0.007885	27.01	0.733065	2	1095.56	-0.369167	39.845	0	C1203	40.74	A6802	11.9	A6802	0.1
High	YTSGPGSRI	10	1	1	P05787		0	1.11157e+08	0.003	0.01109	26.94	0.806173	2	937.474	-0.259164	27.1418	0	C1203	70.37	A6802	79.7	C1203	0.4
High	KKKDSETSF	1	1	1	Q9NZ63		0	0	0.003	0.01176	26.77	0.697928	2	1069.55	-0.27084	17.2871	0	C1203	33.33	B1503	19.7	B1503	0.5
High	ETIPGPDAKV	24	1	1	Q8TDP1		0	176132476	0.003	0.008348	26.67	0.559185	2	1026.55	-1.05351	43.4312	0	C1203	48.57	A6802	14.5	A6802	0.12
High	EVSNIVKEAI	6	1	1	P63172		0	2.63214e+07	0.003	0.009447	26.65	0.766467	2	1101.62	0.0804305	55.3458	0	C1203	11.43	A6802	49.7	A6802	0.5
High	EVMKYITSL	13	1	1	P11586		0	28090546	0.003	0.01038	26.15	0.767537	2	1083.58	-0.0131492	64.8132	0	C1203	40.74	A6802	16.6	A6802	0.15
High	GQDKPHETY	1	1	1	Q12789		0	3.20772e+06	0.003	0.01244	25.76	0.593703	2	1074.48	-0.281521	19.0775	0	C1203	40.74	B1503	85.5	B1503	1.7
High	AKQRLQQLF	2	1	1	Q9P0U1		0	3.00153e+07	0.003	0.00825	25.53	0.446438	2	1131.66	0.131176	40.1579	0	C1203	33.33	B1503	69.4	B1503	1.5
High	AQYDQASTKY	1	1	1	P49454		0	6.13858e+06	0.003	0.007931	24.92	0.940713	2	1174.54	-1.23705	31.1106	0	C1203	40	B1503	4.9	B1503	0.05
High	SAYDPPRQI	8	1	1	P43268		0	5.99017e+07	0.003	0.01183	24.56	1.54361	2	1046.53	-0.732772	41.6382	0	C1203	81.48	C1203	35.9	C1203	0.17
High	RSFPGSKEY	5	1	1	Q14517		0	1.1324e+07	0.003	0.009986	24.08	1.37107	2	1070.53	-0.374259	28.1694	0	C1203	85.19	B1503	6.5	B1503	0.09
High	SKYAADRNHY	2	1	1	P67809		0	8.38148e+06	0.003	0.01104	23.88	1.45369	3	1224.58	0.245039	19.643	0	C1203	31.43	B1503	31.6	B1503	0.8
High	RQLPAMTAL	12	1	1	Q13045		0	6.79463e+07	0.003	0.008131	23.62	1.01893	2	1000.56	-0.21567	52.5211	0	C1203	44.44	B1503	4.8	B1503	0.05
High	KKFKGDLAY	4	2	2	Q96K31;Q96EF9		0	32258482	0.003	0.008874	23.53	1.21283	2	1069.6	-0.388935	25.7244	0	C1203	44.44	B1503	3.4	B1503	0.02
High	FGVDRAILY	6	1	1	P06756		0	2.03025e+07	0.003	0.009567	23.39	1.47384	2	1053.57	-0.463258	63.7661	0	C1203	48.15	C1203	20.6	C1203	0.08
High	RKVPDNQQF	3	1	1	Q9BX10		0	1.82092e+07	0.003	0.01026	23.16	2.14406	2	1131.59	-0.178218	25.9255	0	C1203	37.04	B1503	31.5	B1503	0.8
High	EVYEKPVQV	21	1	1	Q9Y508		0	3.23248e+08	0.003	0.01262	22.97	2.47183	2	1090.58	-0.683366	41.471	0	C1203	51.85	A6802	15.2	A6802	0.15
High	KKIRTSPTF	3	1	1	P62750		0	2.67057e+07	0.003	0.009857	22.37	0.815836	2	1077.64	-0.588842	23.2574	0	C1203	33.33	B1503	4.7	B1503	0.05
High	HSVYITSRV	1	1	1	Q8N961		0	1.59884e+07	0.003	0.01175	22.32	2.28037	2	1061.57	-0.634515	31.9238	0	C1203	66.67	A6802	5.7	A6802	0.03
High	RQEGVPRTF	16	1	1	Q00403		0	2.24686e+08	0.003	0.01058	21.97	2.74336	2	1089.58	-0.912471	29.9392	0	C1203	44.44	B1503	9.5	B1503	0.2
High	KKFNEPGSQY	2	1	1	P51531		0	1.00511e+07	0.003	0.008147	21.8	2.37684	2	1197.59	0.195551	27.2406	0	C1203	40	B1503	26.1	B1503	0.7
High	TTFEHAHNMRV	4	1	1	P13639		0	2.04303e+07	0.003	0.01083	21.58	2.18933	3	1342.63	-0.24001	28.0159	0		0	A6802	103.8	A6802	0.8
High	ESIDIITRA	4	1	1	Q16531		0	8.10697e+07	0.003	0.009655	21.42	2.98538	2	1017.56	-0.068418	52.3747	0	C1203	37.04	A6802	12.9	A6802	0.12
High	GKRIGVFSY	32	1	1	Q01581		0	9.24542e+07	0.003	0.01086	21.42	1.69424	2	1026.57	-0.915811	44.1388	0	C1203	40.74	B1503	23.4	B1503	0.6
High	YTAEIKQNL	9	1	1	O95926		0	1.10028e+07	0.003	0.01115	21.34	2.63323	2	1079.57	-0.917166	42.6394	0	C1203	77.78	A6802	20.9	A6802	0.2
High	EVIEKFDYV	9	1	1	Q92871		0	3.09609e+07	0.003	0.009382	21.32	2.36056	2	1141.58	-0.256832	60.2758	0	C1203	40.74	A6802	2.9	A6802	0.01
High	FSVVPSPKV	6	4	4	Q13509;P04350;P68371;P07437		0	1.65142e+07	0.003	0.007559	21.3	3.26473	2	959.556	0.0496139	55.3573	0	C1203	70.37	A6802	122.4	C1203	0.8
High	HQLRAQIMAY	1	1	1	P51532		0	2.57722e+06	0.003	0.011	20.84	4.20805	2	1230.64	0.637125	42.4973	0	C1203	28.57	B1503	5.4	B1503	0.06
High	GQTTTYLTY	2	1	1	P11388		0	2.61304e+07	0.003	0.008381	20.79	2.95832	2	1047.5	-1.05466	57.6272	0	C1203	44.44	B1503	3.8	B1503	0.03
High	NTIDPSHPM	10	1	1	P49588		0	6.0963e+07	0.003	0.007996	20.7	1.98315	2	1011.46	-0.465748	38.0305	0	C1203	62.96	A6802	9.3	A6802	0.07
High	EGYPGQRYY	10	1	1	P34896		0	2.89306e+07	0.003	0.01027	20.54	1.76528	2	1132.51	-0.562247	43.25	0	C1203	51.85	C1203	213.1	C1203	0.9
High	LVPPWTRVY	3	1	1	Q9H9T3		0	2.40601e+07	0.003	0.01074	20.42	2.4375	2	1130.64	-0.27217	67.2166	0	C1203	51.85	C1203	49	C1203	0.25
High	DTSPVFQRL	7	1	1	Q9NU22		0	1.67425e+07	0.003	0.007709	20.3	4.32097	2	1062.56	-0.778184	56.6734	0	C1203	77.78	A6802	39.1	A6802	0.4
High	ETDPGMVHL	4	1	1	Q9NZN8		0	6.05075e+07	0.003	0.01068	19.64	3.05883	2	998.461	-0.165421	49.8993	0	C1203	77.78	A6802	175.2	A6802	1.2
High	FKVGDPEEY	8	1	1	Q8WYP3		0	2.51325e+07	0.003	0.00757	19.55	3.57321	2	1083.5	-0.605884	49.4476	0	C1203	51.85	B1503	131	B1503	2.5
High	AKFSRPAQL	2	1	1	P22314		0	2.01056e+07	0.003	0.01005	19.5	2.86451	2	1017.58	-0.0691456	30.846	0	C1203	51.85	B1503	85.8	B1503	1.7
High	TTYEGIFKT	4	1	1	Q8WWM7		0	1.75495e+07	0.003	0.01214	18.94	5.25382	2	1059.54	-0.382603	52.91	0	C1203	40.74	A6802	31	A6802	0.3
High	EVMEWMNNV	1	1	1	Q92598		0	7.10803e+06	0.003	0.0124	18.84	2.15453	2	1151.49	0.167048	78.8539	0	C1203	40.74	A6802	2.7	A6802	0.01
High	RKWDTEIRL	2	1	1	O00443		0	5.48929e+06	0.003	0.01056	18.58	4.28022	3	1216.68	-0.49272	43.6582	0	C1203	44.44	B1503	357.6	B1503	4
High	YSYPELVKM	10	1	1	Q96MH7		0	1.49379e+07	0.003	0.007546	18.23	5.16254	2	1129.56	-0.521973	63.9142	0	C1203	77.78	C1203	7.5	C1203	0.01
High	GTYFNPHTV	5	1	1	O60294		0	4.37933e+07	0.003	0.008363	17.87	5.15146	2	1035.49	-0.0133448	44.2949	0	C1203	77.78	C1203	101.1	C1203	0.5
High	ETFMNRVEV	1	1	1	Q9UBU8		0	1.85514e+07	0.003	0.008873	16.97	6.62498	2	1124.54	0.0388092	55.387	0	C1203	77.78	A6802	4.8	A6802	0.02
High	RVFPSPMRI	9	1	1	Q9UPR0		0	2.52424e+07	0.003	0.01202	16.32	7.25705	2	1102.62	-0.217017	49.0908	0	C1203	44.44	C1203	26.4	C1203	0.12
High	DVASIKEKV	1	1	1	Q13601		0	8.52025e+06	0.003	0.008681	16.29	7.08649	2	988.567	-0.0221775	32.7145	0	C1203	44.44	A6802	27.9	A6802	0.3
High	ATYVFLHTV	2	1	1	Q53FV1		0	8108509	0.003	0.008713	16.01	10.8464	2	1050.56	-0.643917	61.6495	0	C1203	77.78	A6802	26.2	A6802	0.25
High	RKLDQVSQF	4	1	1	O60502		0	3.59292e+07	0.003	0.009753	15.79	8.65508	2	1120.61	0.0251763	33.8903	0	C1203	37.04	B1503	10.3	B1503	0.25
High	GKTTQVTQF	3	1	1	Q9H2U1		0	7.9456e+06	0.003	0.008914	15.57	9.1062	2	1009.53	-0.688526	31.105	0	C1203	33.33	B1503	81.1	B1503	1.6
High	HQKKEFVKY	3	1	1	Q9BUL8		0	8.74395e+06	0.003	0.01202	15.52	7.81033	3	1206.66	-0.154464	20.2979	0	C1203	40.74	B1503	10	B1503	0.2
High	YKVDNLEEF	1	1	1	Q12789		0	2.77932e+06	0.003	0.009333	14.96	11.03	2	1156.55	-0.0620362	59.2156	0	C1203	40.74	B1503	32.2	B1503	0.8
High	KKFSDSVKSTF	6	1	1	Q9ULG6		0	6.75456e+07	0.003	0.01244	13.28	20.0457	3	1273.68	-0.108974	31.5501	0		0	B1503	37.2	B1503	0.9
High	RASFIFISV	6	1	1	Q8NBI5		0	6.99945e+06	0.004	0.01667	44.6	0.007571	2	1039.59	0.363959	76.8834	0	C1203	81.48	A6802	76.5	C1203	0.5
High	AHLNPAVTF	12	1	1	Q92482		0	2.63074e+07	0.004	0.01364	36.67	0.0742494	2	969.515	0.0888309	50.6151	0	C1203	40.74	B1503	27.2	B1503	0.7
High	KSIARVLTV	19	1	1	P42766		0	6.1492e+07	0.004	0.01443	35.45	0.0193014	2	986.635	-0.755062	38.2853	0	C1203	77.78	C1203	34.7	C1203	0.15
High	LKTGISDVF	1	1	1	P19338		0	35937741	0.004	0.01589	35.37	0.0797154	2	979.546	0.0252528	57.7239	0	C1203	37.04	B1503	25.6	B1503	0.7
High	TLIEDILGV	8	1	1	Q8TEL6		0	9.72731e+06	0.004	0.01515	34.67	0.0873454	2	972.561	-0.476804	102.871	0	C1203	48.15	A6802	119	A6802	0.9
High	NSASIFNTL	14	1	1	Q96HU1		0	1.92102e+07	0.004	0.01292	34.42	0.137282	2	966.489	-0.314717	73.4297	0	C1203	77.78	A6802	11.8	A6802	0.1
High	SAKTPGFSV	13	1	1	Q9NY61		0	1.44016e+08	0.004	0.01714	33.69	0.204054	2	893.472	-0.326358	40.5203	0	C1203	74.07	C1203	486.7	C1203	1.6
High	IAVNAVLTV	12	1	1	P48643		0	1.65889e+07	0.004	0.0182	33.69	0.0897882	2	899.556	0.256474	75.7464	0	C1203	85.19	C1203	15.6	C1203	0.05
High	ETSDILHRM	2	1	1	Q9UHD2		0	2.0947e+07	0.004	0.01415	33.51	0.144014	2	1101.53	-0.736783	39.3415	0	C1203	66.67	A6802	12.8	A6802	0.12
High	TTSTITRHTV	3	1	1	Q07954		0	2.04137e+07	0.004	0.01839	33.17	0.220491	2	1116.6	-1.01588	23.1525	0	C1203	42.86	A6802	11.8	A6802	0.1
High	HTVGFILQL	4	1	1	Q5SRE5		0	4.73673e+07	0.004	0.01456	33.04	0.124471	2	1027.59	-0.0972293	76.2987	0	C1203	77.78	A6802	18.5	A6802	0.17
High	KKIPSTVEF	20	1	1	Q9H2G9		0	4.18464e+07	0.004	0.01316	32.55	0.137281	2	1048.6	0.150805	37.2722	0	C1203	44.44	B1503	4.6	B1503	0.04
High	KKVERQTEL	3	2	2	P11940;Q9H361		0	3.17721e+07	0.004	0.01449	31.01	0.21033	2	1130.65	-0.514766	18.1898	0	C1203	44.44	B1503	209.3	B1503	3
High	KAISGVHTV	4	2	2	Q2VIR3;P41091		0	6.19755e+07	0.004	0.01443	30.66	0.167293	2	911.531	-0.468617	23.0082	0	C1203	85.19	C1203	29.8	C1203	0.12
High	SKFAGGLHF	2	1	1	Q09666		0	1.52548e+07	0.004	0.0175	30.12	0.307291	2	963.504	-0.543133	45.9127	0	C1203	37.04	B1503	2.6	B1503	0.01
High	IATEIILEI	1	1	1	P42892		0	5.86125e+07	0.004	0.01365	29.51	0.236369	2	1014.61	-0.350495	92.5462	0	C1203	81.48	C1203	36.4	C1203	0.17
High	AAQAHTREL	1	1	1	O75150		0	3.0674e+06	0.004	0.01502	29.38	0.405554	2	996.522	-0.509027	18.8709	0	C1203	85.19	C1203	343.4	C1203	1.3
High	NATAVVRHM	2	2	2	Q14012;Q8IU85		0	6.54805e+06	0.004	0.01767	29.31	0.391103	2	998.52	-0.29979	25.3996	0	C1203	74.07	C1203	549.9	C1203	1.8
High	TVVEPYNATL	1	10	10	Q13885;Q9BVA1;Q13509;P04350;P68371;P07437;Q9BUF5;A6NNZ2;Q3ZCM7;A6NKZ8		0	6.02721e+06	0.004	0.01784	29.15	0.558351	2	1106.57	0.0653145	64.2092	0	C1203	34.29	A6802	107.5	A6802	0.8
High	EAAPGALGQV	7	1	1	Q8WYQ5		0	1.50154e+07	0.004	0.01864	29.08	0.428812	2	912.479	0.0470794	51.3219	0	C1203	60	A6802	25	A6802	0.25
High	ISFPAPLYI	11	1	1	P86397		0	1.93581e+07	0.004	0.01907	28.94	0.376039	2	1020.58	-0.495766	96.4135	0	C1203	77.78	C1203	8.2	C1203	0.01
High	ETYFESARV	5	1	1	Q9H3L0		0	1.69433e+07	0.004	0.01437	28.69	0.429486	2	1101.52	0.12395	48.3999	0	C1203	70.37	A6802	4.3	A6802	0.01
High	FASTILHLV	23	1	1	P61803		0	3.96009e+07	0.004	0.01894	28.64	0.505307	2	1000.58	0.179866	72.6418	0	C1203	81.48	A6802	5.7	A6802	0.03
High	HAFWGGSVV	12	1	1	O75179		0	1.66338e+08	0.004	0.01527	28.03	0.30126	2	959.473	-0.111623	58.3984	0	C1203	81.48	C1203	6.6	C1203	0.01
High	MAAmATARV	5	1	1	Q15904	M4(Oxidation)	0	954963	0.004	0.01326	27.92	0.739134	2	937.459	-0.257313	27.8706	0	C1203	77.78	A6802	4.2	A6802	0.01
High	AKLKGIGEY	5	1	1	Q92620		0	21942977	0.004	0.01446	27.82	0.395562	2	978.561	-0.649361	30.5796	0	C1203	48.15	B1503	17.3	B1503	0.5
High	EAMKQILGV	14	1	1	Q14444		0	5.70873e+07	0.004	0.01914	27.75	0.66489	2	988.55	0.0282037	55.7894	0	C1203	81.48	A6802	13.4	A6802	0.12
High	GKAWGILTF	1	1	1	P82930		0	4.25205e+06	0.004	0.01771	27.49	0.529456	2	992.556	0.012879	77.8791	0	C1203	44.44	B1503	9	B1503	0.17
High	MMIPSQISY	4	1	1	Q04637		0	1.30094e+07	0.004	0.01835	27.49	0.546923	2	1069.51	0.297094	74.8138	0	C1203	48.15	B1503	3.1	B1503	0.01
High	IKKNNPRKY	1	2	2	P67809;P16989		0	5.21201e+06	0.004	0.01456	26.76	0.257147	2	1160.69	0.0841784	16.1068	0	C1203	44.44	B1503	253.6	B1503	3.5
High	KKHHSTIVY	2	1	1	Q5VT52		0	5.63829e+06	0.004	0.0129	26.59	0.490311	2	1112.62	-0.74998	18.9143	0	C1203	44.44	B1503	4.8	B1503	0.05
High	ETFGMKLSV	18	2	2	Q9GZQ8;A6NCE7		0	5.23237e+07	0.004	0.01795	26.4	0.893095	2	1011.52	-0.31096	63.2099	0	C1203	77.78	A6802	4.9	A6802	0.02
High	GKNEVTLEF	4	1	1	Q08945		0	2.04276e+07	0.004	0.01322	26.28	1.07414	2	1036.53	-0.891826	54.761	0	C1203	40.74	B1503	17.3	B1503	0.5
High	EVAKVIVSM	6	1	1	Q99996		0	6.52499e+07	0.004	0.01278	26.11	0.787251	2	975.554	-0.398361	51.7059	0	C1203	40.74	A6802	21.5	A6802	0.2
High	IKKEFDKKY	3	2	2	P63167;Q96FJ2		0	2.09856e+07	0.004	0.01756	26.06	0.613781	3	1198.68	-0.384153	20.5107	0	C1203	44.44	B1503	197	B1503	3
High	DVYSGTPTKV	8	1	1	Q14493		0	8.00553e+07	0.004	0.01602	25.73	0.995561	2	1066.54	-1.14435	41.4095	0	C1203	40	A6802	108.4	A6802	0.8
High	KAFPKAYLL	16	1	1	Q66K89		0	1.00713e+08	0.004	0.01816	25.57	0.252649	2	1050.63	-0.329665	49.5582	0	C1203	85.19	C1203	33.7	C1203	0.15
High	GMYGKIAVM	6	1	1	Q16531		0	1.12714e+07	0.004	0.01799	24.16	1.12138	2	969.489	-0.387718	53.4587	0	C1203	44.44	B1503	11.8	B1503	0.25
High	VKNLNGKSY	2	1	1	Q9HB71		0	1.35153e+06	0.004	0.01384	23.64	1.32046	2	1022.56	-0.991679	21.1413	0	C1203	44.44	B1503	25.6	B1503	0.7
High	FSFPSIFIY	3	1	1	O43913		0	1.40501e+07	0.004	0.01893	23.61	2.12791	2	1120.57	-0.157696	107.252	0	C1203	85.19	C1203	7.3	C1203	0.01
High	EVDEQMLNV	1	4	4	Q13885;Q9BVA1;P68371;P07437		0	8.8755e+06	0.004	0.01441	23.49	1.25584	2	1076.49	0.0522257	65.0378	0	C1203	44.44	A6802	186.4	A6802	1.2
High	GQVQVRTLY	1	1	1	Q8N8N7		0	8.66926e+06	0.004	0.01904	23.13	1.54264	2	1063.59	0.366729	44.5549	0	C1203	37.04	B1503	8.1	B1503	0.15
High	GKFNVLLTTY	2	2	2	P51531;P51532		0	1.06396e+07	0.004	0.0182	23.03	1.39789	2	1155.64	-0.3832	66.6558	0	C1203	37.14	B1503	34.5	B1503	0.9
High	EVIGGTNHTL	14	1	1	Q9P2E3		0	2.90974e+07	0.004	0.01678	22.97	1.64166	2	1040.54	-0.571511	37.0135	0	C1203	40	A6802	51.4	A6802	0.5
High	SKLTQILSY	1	1	1	Q13123		0	3.65488e+06	0.004	0.01505	22.2	1.06322	2	1052.6	0.250097	62.1074	0	C1203	44.44	B1503	11	B1503	0.25
High	MTTKLISEL	3	1	1	Q5UIP0		0	7.69059e+07	0.004	0.01645	22.15	1.23919	2	1035.57	-0.730676	58.2607	0	C1203	74.07	A6802	25.4	A6802	0.25
High	RKLRGHVSH	2	1	1	P46776		0	1.68094e+07	0.004	0.01332	22.1	1.17431	2	1089.64	-0.914357	15.9623	0	C1203	3.7	B1503	418.3	B1503	4.5
High	RKLDFPSASF	1	1	1	O60344		0	7.93395e+06	0.004	0.01603	21.17	2.71773	2	1167.62	-0.0797483	53.0726	0	C1203	37.14	B1503	10.3	B1503	0.25
High	KKANITFEY	22	1	1	O15372		0	9.5668e+07	0.004	0.01299	21	2.86157	2	1113.59	-0.33032	38.3705	0	C1203	44.44	B1503	16.7	B1503	0.4
High	RKIKVSNTL	3	1	1	P36543		0	8.81375e+07	0.004	0.0151	20.82	0.473997	2	1058.67	-0.656772	23.2824	0	C1203	40.74	B1503	25.3	B1503	0.7
High	LSFPTTKTY	12	1	1	P69905		0	3.0599e+07	0.004	0.01696	20.54	3.11418	2	1057.56	-0.477987	53.5608	0	C1203	85.19	B1503	9.7	C1203	0.03
High	ETYQFSGVYV	8	1	1	P61160		0	5.99526e+07	0.004	0.01672	20.24	2.95273	2	1192.55	0.366049	76.257	0	C1203	45.71	A6802	3.8	A6802	0.01
High	AKYPIKQSL	4	1	1	P21283		0	4.87645e+07	0.004	0.01529	20.19	1.47647	2	1047.62	-1.46011	32.2527	0	C1203	51.85	B1503	134.5	B1503	2.5
High	DTPDWVARI	1	1	1	Q06203		0	6.85721e+06	0.004	0.01395	20.03	3.82797	2	1072.54	0.267372	70.0596	0	C1203	66.67	A6802	52	A6802	0.5
High	KAADIASKV	1	1	1	O95671		0	4.79303e+06	0.004	0.01307	19.88	3.27732	2	902.53	-0.186358	24.8464	0	C1203	81.48	C1203	60.3	C1203	0.3
High	IGVEHVVVY	1	1	1	P49411		0	2.08842e+08	0.004	0.01843	19.34	4.97198	2	1014.56	-0.255508	54.3773	0	C1203	51.85	B1503	20	C1203	0.4
High	EVFQGVEKL	14	1	1	Q9Y330		0	5.41726e+07	0.004	0.01725	19.16	5.45054	2	1048.57	-0.544782	54.6787	0	C1203	44.44	A6802	78	A6802	0.7
High	HTFHGNFFV	2	2	2	O95486;O95487		0	1.24155e+07	0.004	0.0164	19.14	4.40299	2	1105.52	-0.783241	48.5733	0	C1203	70.37	A6802	2.1	A6802	0.01
High	AKPEYISKTY	2	1	1	Q13823		0	1.10119e+07	0.004	0.01753	18.52	4.77634	3	1199.63	0.422966	29.8049	0	C1203	31.43	B1503	133.1	B1503	2.5
High	ETSPVLQKL	17	1	1	Q9NRR4		0	3.60772e+08	0.004	0.01868	18.31	4.12976	2	1014.58	-0.758288	46.5611	0	C1203	77.78	A6802	25.9	A6802	0.25
High	ETAPRTIFQRV	1	1	1	Q9UBB4		0	3.96512e+08	0.004	0.01527	18.24	4.49006	3	1317.73	-0.185785	44.716	0		0	A6802	29.8	A6802	0.3
High	HTSPLTQIRL	2	1	1	Q96BP3		0	4.56431e+07	0.004	0.01355	17.38	3.29149	2	1165.67	0.147221	49.2055	0	C1203	51.43	A6802	124.2	A6802	0.9
High	KGYPSEFSTY	3	1	1	P49674		0	8.64387e+06	0.004	0.01641	17.33	5.44795	2	1178.54	-0.644164	48.8989	0	C1203	34.29	B1503	32.2	B1503	0.8
High	EASFVLHTI	3	1	1	Q15418		0	6.92365e+06	0.004	0.01667	17.27	10.5918	2	1016.54	-0.0364384	60.9531	0	C1203	74.07	A6802	7.6	A6802	0.05
High	RQLPSSHAL	6	1	1	Q8WV83		0	1.8536e+07	0.004	0.01584	17.2	4.63599	2	1008.56	-0.929594	27.601	0	C1203	44.44	B1503	5.1	B1503	0.06
High	YKIYPGHGRRY	2	1	1	P83731		0	2.32564e+07	0.004	0.01752	17.12	8.1983	3	1409.74	-0.508396	25.2159	0		0	B1503	329.2	B1503	4
High	KVPPFTFHV	22	1	1	Q6NZI2		0	9.76454e+07	0.004	0.01275	16.1	5.69247	2	1071.6	-0.628324	55.4135	0	C1203	44.44	A6802	46.2	A6802	0.5
High	DVAQIIIRI	11	1	1	Q7L622		0	3.5051e+07	0.004	0.0152	16.07	2.4742	2	1040.65	-0.257155	79.5496	0	C1203	40.74	A6802	61.8	A6802	0.6
High	STSDLYNFQV	4	1	1	P10914		0	2.93749e+07	0.004	0.01741	15.96	7.08949	2	1173.54	0.73889	75.8105	0	C1203	45.71	A6802	9.9	A6802	0.07
High	KQFEKQVEL	2	1	1	Q14204		0	1.20629e+07	0.004	0.01306	13.12	16.7832	2	1148.63	-0.125651	33.8002	0	C1203	51.85	B1503	12.1	B1503	0.3
High	MKFIDNTLY	5	1	1	Q14116		0	1.30177e+07	0.004	0.0171	12.92	19.828	2	1144.57	0.0848178	64.2386	0	C1203	40.74	B1503	6.1	B1503	0.08
High	QVIKPPLIFV	1	1	1	Q13428		0	2.58725e+07	0.004	0.01894	10.69	3.73658	2	1153.73	0.124265	79.3934	0	C1203	28.57	A6802	18.9	A6802	0.17
High	FAFEHSEEY	1	1	1	Q9BQ70		0	1.90619e+07	0.004	0.01271	10.27	7.89368	2	1158.47	0.159971	52.4647	0	C1203	88.89	C1203	4.6	C1203	0.01
High	EIYSESHRV	6	1	1	Q96I51		0	2.67359e+07	0.005	0.01923	47.99	0.00602774	2	1119.54	-0.260072	25.4903	0	C1203	44.44	A6802	15.4	A6802	0.15
High	QKAPDGKSY	1	1	1	Q9HBL8		0	5.54815e+06	0.005	0.02117	37.34	0.0696032	2	993.499	-1.01792	18.9005	0	C1203	51.85	B1503	67.6	B1503	1.4
High	EVIAEAVGV	7	1	1	O15226		0	1.73886e+07	0.005	0.01957	37.26	0.067599	2	886.488	-0.065006	62.7792	0	C1203	40.74	A6802	4.9	A6802	0.02
High	SATETINKL	7	1	1	P15924		0	3.08234e+07	0.005	0.02031	32.8	0.180114	2	976.531	-0.123854	35.1261	0	C1203	81.48	C1203	193.6	C1203	0.8
High	EVDATSKYSV	3	1	1	Q9UK61		0	1.37199e+07	0.005	0.02099	30.88	0.260286	2	1098.53	-0.631801	36.5221	0	C1203	25.71	A6802	45.3	A6802	0.4
High	MTADSRSQV	5	1	1	P60900		0	1.12234e+08	0.005	0.02079	30.17	0.321659	2	994.462	-0.556863	23.7859	0	C1203	74.07	A6802	3.8	A6802	0.01
High	AKKEKEPEY	1	1	1	O95793		0	4.00263e+06	0.005	0.02003	29.62	0.49415	2	1121.58	1.00319	17.4717	0	C1203	48.15	B1503	226.2	B1503	3.5
High	HTINGHNCEV	2	1	1	P51991		0	1.26978e+07	0.005	0.01937	27.98	0.357769	2	1123.49	-0.353242	26.6728	0	C1203	45.71	A6802	31.5	A6802	0.3
High	GAYKYIQEL	7	1	1	P61313		0	2.30281e+07	0.005	0.02002	26.73	0.774666	2	1084.57	-0.724143	56.2609	0	C1203	85.19	C1203	51.5	C1203	0.25
High	NQKPPSAEY	3	1	1	Q9UPN3		0	2.20847e+07	0.005	0.02053	24.93	1.37352	2	1033.49	-0.364651	27.6764	0	C1203	48.15	B1503	10.1	B1503	0.2
High	EIVDFAKQV	1	1	1	P55055		0	2.98038e+06	0.005	0.02105	23.66	2.0831	2	1048.57	-1.3597	58.3822	0	C1203	44.44	A6802	27.9	A6802	0.3
High	QQFRNAPPF	10	1	1	O60830		0	7.62747e+07	0.005	0.01922	22.02	3.14846	2	1104.56	-0.0289904	46.8285	0	C1203	33.33	B1503	2.5	B1503	0.01
High	ELFTGFIKV	25	1	1	Q86TM6		0	7.63573e+07	0.005	0.02077	20.67	1.83278	2	1053.6	-0.128494	79.1498	0	C1203	44.44	A6802	54.3	A6802	0.5
High	AAFDQWREW	2	1	1	Q16555		0	1.21252e+07	0.005	0.02032	18.46	4.41796	2	1208.55	0.501837	72.3482	0	C1203	55.56	C1203	481.5	C1203	1.6
High	KALSRLISF	4	1	1	Q8N8L2		0	4.91369e+07	0.005	0.01959	17.33	1.44243	2	1034.63	-0.897009	58.4408	0	C1203	74.07	B1503	8.8	B1503	0.17
High	ITIHLPSPV	1	1	1	P13639		0	3.30753e+06	0.005	0.02038	17.29	3.29976	2	976.582	-0.253205	66.4337	0	C1203	70.37	A6802	17.9	C1203	0.15
High	GQHSHVVRY	1	1	1	P30291		0	4.49812e+06	0.005	0.02111	16.46	7.63802	2	1082.55	-0.247237	19.1588	0	C1203	48.15	B1503	4.3	B1503	0.04
High	SALEHVVEF	4	1	1	O75581		0	1.13461e+08	0.005	0.02098	12.79	24.3914	2	1030.52	0.4758	60.3828	0	C1203	81.48	B1503	17	C1203	0.15
High	YKASSGLLY	1	1	1	Q08945		0	1.75001e+07	0.005	0.01918	10.76	41.3056	2	1001.53	-0.103211	46.1222	0	C1203	51.85	B1503	3.9	B1503	0.03
High	RKFPGRPEEEY	3	1	1	Q9NUQ8		0	3.06326e+07	0.005	0.01972	10.39	43.5849	3	1407.7	0.282861	29.839	0		0	B1503	167.2	B1503	3
High	AAAGLHSNV	2	1	1	Q9UJX3		0	7.18253e+06	0.006	0.0216	43.3	0.0194063	2	839.437	0.106086	24.575	0	C1203	85.19	A6802	163.7	A6802	1.1
High	DLAPIGIRV	4	1	1	Q99714		0	7.73583e+06	0.006	0.02137	41.3	0.00855843	2	953.577	-0.547578	68.4269	0	C1203	51.85	A6802	140	A6802	1
High	FTAPATVSL	1	1	1	Q71RG4		0	1.13414e+07	0.006	0.02215	37.99	0.0716037	2	906.493	-0.539392	69.2926	0	C1203	85.19	C1203	5.8	C1203	0.01
High	RKVPGVTAI	15	3	3	Q06787;P51114;P51116		0	7.35079e+07	0.006	0.02149	34.74	0.03072	2	940.593	-0.413438	32.862	0	C1203	40.74	B1503	21.4	B1503	0.6
High	AARPATSTL	5	1	1	Q04637		0	6.69068e+07	0.006	0.02185	34.57	0.184381	2	887.494	-0.202785	25.9323	0	C1203	88.89	C1203	72.5	C1203	0.4
High	KTASINQNV	4	1	1	Q8NI77		0	2.97234e+07	0.006	0.02175	34.3	0.171519	2	974.526	-0.473758	25.5791	0	C1203	74.07	A6802	59.5	A6802	0.6
High	EVIRDVINV	13	1	1	Q6IEG0		0	1.0517e+08	0.006	0.02131	33.87	0.108889	2	1056.6	-0.747484	59.3113	0	C1203	44.44	A6802	7.8	A6802	0.05
High	EVAQAGKAV	4	1	1	Q9UPN9		0	1.21411e+07	0.006	0.02239	33.57	0.219639	2	872.484	-0.106814	22.5131	0	C1203	44.44	A6802	79.3	A6802	0.7
High	AAAATGRLL	7	1	1	Q06481		0	1.21248e+07	0.006	0.02165	32.38	0.189211	2	843.504	-0.34282	34.7802	0	C1203	85.19	C1203	131.4	C1203	0.6
High	RKKAYADFY	4	1	1	P09669		0	4.52373e+07	0.006	0.02249	31.6	0.292056	2	1161.6	-0.316263	28.4552	0	C1203	37.04	B1503	32.7	B1503	0.8
High	KKFASFNAY	1	1	1	Q969S3		0	16499024	0.006	0.02125	31.3	0.313611	2	1075.56	-0.421248	37.072	0	C1203	40.74	B1503	2.9	B1503	0.01
High	AQHLTVSGF	2	1	1	Q96GX5		0	1.17088e+07	0.006	0.02197	31.26	0.392789	2	959.495	0.204524	47.0007	0	C1203	37.04	B1503	3.6	B1503	0.03
High	GQRKPATSY	10	1	1	P46779		0	1.00522e+09	0.006	0.02194	30.48	0.345297	2	1007.53	-0.664617	18.7703	0	C1203	37.04	B1503	5	B1503	0.05
High	ETADITHAL	13	1	1	Q15042		0	5.42957e+07	0.006	0.02194	30.37	0.295565	2	970.483	-0.613368	46.2599	0	C1203	74.07	A6802	2.4	A6802	0.01
High	EIFDGNVAHI	2	1	1	P46939		0	2.1737e+07	0.006	0.02261	30.27	0.355497	2	1114.55	-0.0173399	62.9583	0	C1203	31.43	A6802	25.5	A6802	0.25
High	HQFLSEQF	13	1	1	Q8TDB6		0	2.72162e+07	0.006	0.02344	30.23	0.336451	2	1035.49	-0.376662	55.5434	0	C1203	36.67	B1503	25.2	B1503	0.7
High	AASPIITLV	1	1	1	Q8TEM1		0	5.75899e+07	0.006	0.02131	30.1	0.159143	2	884.545	0.0942287	79.8224	0	C1203	92.59	C1203	35.1	C1203	0.15
High	EVAPAGSQV	3	1	1	O75147		0	1.19233e+07	0.006	0.02242	29.41	0.463303	2	857.437	0.161763	35.0241	0	C1203	48.15	A6802	8.1	A6802	0.05
High	EVNKVISSV	10	1	1	Q93008		0	2.13578e+08	0.006	0.02368	29.09	0.349709	2	974.551	-1.05128	39.2965	0	C1203	40.74	A6802	7.9	A6802	0.05
High	TASPLVKSV	26	1	1	Q6P4F7		0	5.68047e+07	0.006	0.0218	28.88	0.385864	2	901.535	-0.163556	34.9787	0	C1203	92.59	C1203	131.3	C1203	0.6
High	YTTDFIYQL	7	1	1	Q01813		0	6.30475e+07	0.006	0.02299	28.03	0.608817	2	1163.56	-0.309622	87.2832	0	C1203	77.78	A6802	7.7	A6802	0.05
High	EIFDKIHSL	9	1	1	Q53GS7		0	2.45799e+07	0.006	0.02119	27.06	0.942519	2	1101.59	-0.232183	55.2738	0	C1203	48.15	A6802	17.8	A6802	0.17
High	KQHVTEAF	1	1	1	O43175		0	9.35581e+06	0.006	0.02378	26.79	1.09229	2	959.494	-0.431593	24.7515	0	C1203	30	B1503	19	B1503	0.5
High	TVADVDEKA	1	1	1	Q13118		0	9.59969e+06	0.006	0.02322	26.52	0.877112	2	947.468	-0.521817	26.923	0	C1203	7.41	A6802	97.2	A6802	0.8
High	ETISPSGQGV	4	1	1	P23610		0	3.93709e+07	0.006	0.02154	26.51	0.91878	2	974.478	-0.72167	40.8355	0	C1203	51.43	A6802	6.4	A6802	0.04
High	YASNITSVL	6	2	2	Q13085;O00763		0	5.22659e+07	0.006	0.02362	26.45	0.613719	2	967.509	-0.63421	68.7026	0	C1203	85.19	C1203	4.4	C1203	0.01
High	YAHFPINVV	2	1	1	P32969		0	6.57709e+07	0.006	0.02173	26.07	0.890562	2	1059.56	-0.268085	65.2429	0	C1203	85.19	C1203	7.5	C1203	0.01
High	GKWPSSQQY	4	1	1	Q8TD26		0	1.61804e+07	0.006	0.02142	25.15	1.00889	2	1080.51	-1.01626	37.4749	0	C1203	44.44	B1503	17.8	B1503	0.5
High	RKIFPSVIKY	1	1	1	Q8IWV7		0	1.05324e+07	0.006	0.02128	24.92	0.243352	3	1250.76	0.752971	45.2003	0	C1203	34.29	B1503	17.1	B1503	0.5
High	RKEETVTVY	6	1	1	Q9BZX2		0	4.56644e+07	0.006	0.02295	23.58	1.41623	2	1124.59	-0.75912	26.1622	0	C1203	48.15	B1503	13.6	B1503	0.4
High	EVFDEKIEV	3	1	1	Q02952		0	1.75096e+07	0.006	0.0229	23.42	1.79948	2	1107.56	-0.403787	60.3805	0	C1203	51.85	A6802	10.1	A6802	0.08
High	GQRVISmY	7	1	1	Q92616	M7(Oxidation)	0	1.39691e+06	0.006	0.02168	22.86	1.49097	2	969.483	0.587308	31.2697	0	C1203	36.67	B1503	107.6	B1503	2
High	KAYGKAKSI	1	2	2	Q99613;B5ME19		0	7.86622e+06	0.006	0.02396	21.69	0.82164	2	965.578	-0.204005	17.4	0	C1203	77.78	C1203	73.9	C1203	0.4
High	ELSDIAHRI	2	1	1	P04075		0	1.82829e+07	0.006	0.02146	21.49	2.24901	2	1053.57	-0.934613	45.1003	0	C1203	37.04	A6802	57	A6802	0.5
High	EVFEKATFI	35	1	1	P19338		0	2.10263e+08	0.006	0.02178	21.29	2.36577	2	1083.57	-0.517269	61.7133	0	C1203	37.04	A6802	8.9	A6802	0.06
High	EAVSFQHFI	3	1	1	Q99598		0	2.10383e+07	0.006	0.02135	20.95	3.48971	2	1077.54	-0.214275	66.3799	0	C1203	70.37	A6802	6.7	A6802	0.04
High	KASEKILQV	4	1	1	Q13428		0	4.60145e+07	0.006	0.02125	20.81	1.63771	2	1015.61	-0.24007	30.5201	0	C1203	88.89	C1203	127.6	C1203	0.6
High	RKPCSVTSY	2	1	1	P37088		0	1.14522e+07	0.006	0.02212	20.46	2.71918	2	1040.52	-0.2698	24.4602	0	C1203	40.74	B1503	14.4	B1503	0.4
High	NKWEVPSVY	6	1	1	Q75QN2		0	2.33167e+07	0.006	0.02279	19.75	4.73486	2	1121.56	0.0431265	60.5447	0	C1203	48.15	B1503	25.5	B1503	0.7
High	YQSPHSGSF	2	1	1	P32004		0	7.1323e+06	0.006	0.02207	19.54	2.04948	2	1009.44	-1.30622	32.336	0	C1203	44.44	B1503	2	B1503	0.01
High	RKIGRDQELY	5	1	1	P26639		0	7.73968e+07	0.006	0.02416	18.74	4.0559	2	1277.7	0.176381	26.6797	0	C1203	31.43	B1503	89.7	B1503	1.7
High	RKFSENPHVY	6	1	1	O75319		0	1.61131e+07	0.006	0.02365	18.65	6.69055	3	1276.64	-0.061218	27.8833	0	C1203	48.57	B1503	9.6	B1503	0.2
High	SLFVSNHAY	6	1	1	P04075		0	2.64804e+07	0.006	0.02149	18.04	5.94068	2	1037.5	-0.155073	48.2604	0	C1203	40.74	B1503	7.2	B1503	0.12
High	EVSRVLEQV	1	1	1	Q96R06		0	1.3551e+07	0.006	0.022	17.12	7.86932	2	1058.58	-0.411434	47.1812	0	C1203	40.74	A6802	5.6	A6802	0.03
High	HSAPFSWET	1	1	1	Q9H425		0	3.42476e+07	0.006	0.0237	16.73	3.87704	2	1061.47	-0.158122	53.0937	0	C1203	44.44	A6802	94.4	A6802	0.8
High	HKIEAGNEF	8	1	1	O43293		0	3.24749e+07	0.006	0.02138	16.21	8.3443	2	1044.51	-0.135483	26.2123	0	C1203	37.04	B1503	13.9	B1503	0.4
High	HAAKVILQV	12	1	1	Q63HN8		0	2.36474e+07	0.006	0.0226	13.77	2.17015	2	978.609	-1.0364	34.6069	0	C1203	85.19	A6802	25.5	A6802	0.25
High	EAADIIQKL	19	1	1	O00471		0	6.6872e+07	0.006	0.02285	13.13	16.0563	2	1000.57	-0.448915	56.8756	0	C1203	85.19	A6802	44.8	A6802	0.4
High	DAYDFSTDYV	1	1	1	Q9BVP2		0	1.79474e+07	0.006	0.02269	12.71	3.78808	2	1195.48	0.450435	80.2337	0	C1203	60	A6802	10.1	A6802	0.08
High	RKVDSKSLF	1	1	1	P31327		0	3592248	0.006	0.02348	11.19	15.1115	2	1079.62	-0.495029	25.6114	0	C1203	33.33	B1503	9	B1503	0.17
High	EVSKIIKRA	2	1	1	O60502		0	2.03645e+07	0.007	0.02913	42.43	0.00501758	2	1043.66	-1.34334	22.2425	0	C1203	11.11	A6802	263.3	A6802	1.5
High	KKPSTGSRY	2	1	1	Q15021		0	7.10607e+06	0.007	0.0271	37.83	0.0534911	2	1023.56	-0.404905	16.2864	0	C1203	40.74	B1503	102.5	B1503	1.9
High	KAIDVVVMV	11	1	1	Q8TDR0		0	3.73985e+07	0.007	0.02665	36.41	0.0576999	2	973.575	-0.386894	62.3272	0	C1203	85.19	C1203	46.5	C1203	0.25
High	KKSKENVLY	1	1	1	P62191		0	3.31527e+06	0.007	0.02957	35.37	0.0532017	2	1108.64	-0.18892	20.6518	0	C1203	44.44	B1503	32.1	B1503	0.8
High	STFSGIKEL	4	1	1	Q8N3U4		0	1.30479e+07	0.007	0.02963	35.28	0.0701776	2	981.525	-0.36008	51.6191	0	C1203	85.19	C1203	31.9	C1203	0.15
High	HAIDRVTTSV	5	1	1	Q9BTT6		0	1.00511e+07	0.007	0.02499	34.85	0.104471	2	1098.59	-0.540777	32.0177	0	C1203	60	A6802	17.3	A6802	0.15
High	EVYGSVAKV	18	1	1	Q07864		0	1.12972e+08	0.007	0.03006	33.98	0.125783	2	951.514	-0.616544	39.1914	0	C1203	48.15	A6802	6.4	A6802	0.04
High	AKGPTLTVY	7	1	1	Q13616		0	3.15649e+07	0.007	0.02896	33.05	0.157974	2	949.535	-0.466151	44.1123	0	C1203	51.85	B1503	9.8	B1503	0.2
High	VSSPFIVSL	6	1	1	Q8WTQ7		0	1.11567e+08	0.007	0.03521	32.55	0.152012	2	948.54	-0.144126	93.2514	0	C1203	88.89	C1203	40	C1203	0.2
High	TTHFVEGGDA	4	1	1	P18124		0	1.58021e+07	0.007	0.02442	32.01	0.143905	2	1033.46	-0.961984	28.1703	0	C1203	20	A6802	466.7	A6802	2.5
High	SQYQGVVVY	10	1	1	Q9Y221		0	3.92811e+08	0.007	0.02455	31.7	0.219186	2	1042.52	-1.84273	59.5725	0	C1203	51.85	B1503	1.9	B1503	0.01
High	VAFPKSLVA	9	1	1	Q8IWI9		0	70949932	0.007	0.02627	31.68	0.158526	2	931.561	-0.4989	57.1506	0	C1203	59.26	C1203	63.6	C1203	0.3
High	KKRLDGRQTY	1	1	1	Q06265		0	3.04432e+06	0.007	0.0287	30.98	0.176038	3	1264.71	-0.282047	17.8935	0	C1203	31.43	B1503	79.9	B1503	1.6
High	DVIGQTITI	1	1	1	Q6UN15		0	8.02518e+06	0.007	0.02974	30.24	0.317368	2	959.54	-0.394384	79.6656	0	C1203	40.74	A6802	70.8	A6802	0.6
High	GKVRTDITY	11	1	1	P62701		0	2.65109e+08	0.007	0.02575	28.69	0.388991	2	1052.57	-0.335923	30.1498	0	C1203	44.44	B1503	27.2	B1503	0.7
High	KLNGQVLVF	2	1	1	Q15459		0	2.39572e+07	0.007	0.02589	27.52	0.303928	2	1017.61	-0.372494	60.4062	0	C1203	44.44	B1503	12.1	B1503	0.3
High	SAAGFPIRV	1	1	1	Q96H55		0	1.00217e+07	0.007	0.03149	26.82	0.744427	2	917.52	-0.0763246	55.9671	0	C1203	88.89	A6802	41.1	C1203	0.3
High	ARAGVVLEm	2	1	1	Q9UKP3	M9(Oxidation)	0	2.45887e+06	0.007	0.02684	26.61	0.797788	2	961.512	-1.14146	33.6071	0	C1203	51.85	B1503	49.4	C1203	1
High	ITAPPSRVL	19	1	1	O00767		0	99998564	0.007	0.0334	26.04	0.287339	2	953.577	-0.729111	44.0287	0	C1203	85.19	C1203	72.7	C1203	0.4
High	EISSILKEL	2	1	1	Q9Y4F5		0	1.2189e+07	0.007	0.02517	25.04	0.677886	2	1031.6	-0.272626	73.4102	0	C1203	51.85	A6802	126.7	A6802	0.9
High	SASKIIVFV	15	1	1	O15439		0	3.9649e+07	0.007	0.02466	23.87	0.351135	2	963.587	-0.00248307	61.2435	0	C1203	85.19	A6802	13.8	A6802	0.12
High	EVIAVSEKV	7	1	1	Q14865		0	1.2157e+07	0.007	0.02984	23.74	1.38403	2	973.556	-0.111192	43.7053	0	C1203	37.04	A6802	4.5	A6802	0.01
High	SAFDSGRLW	1	1	1	Q9NX61		0	4.43359e+06	0.007	0.02576	23.7	1.50839	2	1038.5	-0.429246	64.2221	0	C1203	48.15	C1203	101.3	C1203	0.5
High	ESAPIGIRV	12	1	1	O75054		0	3.30301e+07	0.007	0.03344	23.65	1.06887	2	941.541	-0.670371	50.4529	0	C1203	81.48	A6802	7	A6802	0.04
High	VQIPPSTTY	8	1	1	Q12906		0	2.56973e+07	0.007	0.02474	23.6	2.24195	2	1005.52	-0.756495	56.2566	0	C1203	51.85	B1503	2.3	B1503	0.01
High	KKVETNMAF	3	1	1	P05155		0	9.38887e+06	0.007	0.02595	23.33	1.62371	2	1067.56	-0.213497	29.8169	0	C1203	33.33	B1503	3.4	B1503	0.02
High	TTFESSHYLL	6	1	1	Q16531		0	2.4513e+07	0.007	0.02498	22.81	2.00696	2	1197.58	-0.195862	60.7383	0	C1203	54.29	A6802	17.1	A6802	0.15
High	SKLFSSVTF	1	1	1	Q9HAV4		0	4.05927e+06	0.007	0.02557	22.16	2.85367	2	1015.55	-0.206199	63.7881	0	C1203	37.04	B1503	5	B1503	0.05
High	VmRAQGNVY	1	1	1	P61968	M2(Oxidation)	0	3.11311e+06	0.007	0.02858	21.54	2.1461	2	1053.51	-0.290907	23.5606	0	C1203	44.44	B1503	7.2	B1503	0.12
High	GKSSLIVSY	9	1	1	Q96L33		0	2.05081e+07	0.007	0.02819	20.46	1.95776	2	953.53	-0.0548845	45.717	0	C1203	51.85	B1503	12.6	B1503	0.3
High	IKVIPTVF	8	1	1	P14902		0	2.32009e+07	0.007	0.03053	20.42	0.86243	2	916.586	-0.404791	67.2583	0	C1203	33.33	B1503	200.5	B1503	3
High	MSYLPQVDV	1	1	1	P33527		0	323483	0.007	0.0249	19.05	5.2979	2	1051.51	-0.150629	86.6517	0	C1203	74.07	A6802	44.9	A6802	0.4
High	TAAPPAQPL	5	1	1	P25440		0	2.26778e+07	0.007	0.03158	18.63	4.12087	2	865.477	-0.505784	43.2754	0	C1203	85.19	C1203	72	C1203	0.4
High	RKANILTNRY	2	1	1	Q9NPA3		0	2.01084e+06	0.007	0.02734	17.6	3.23231	3	1248.72	0.533994	24.2782	0	C1203	28.57	B1503	83	B1503	1.7
High	KEYERFSKY	2	2	2	O00148;Q13838		0	5.2499e+07	0.007	0.02958	17.09	8.31571	3	1249.62	-0.441477	27.3897	0	C1203	44.44	B1503	6	B1503	0.08
High	EVFDKTYQFL	1	1	1	Q96EU6		0	8.05147e+06	0.007	0.02882	16.28	9.3048	2	1289.64	-0.0856207	72.8554	0	C1203	48.57	A6802	13.4	A6802	0.12
High	SAVSVAERV	1	1	1	Q08211		0	1.81298e+06	0.007	0.03481	15.35	9.65814	2	917.504	-0.873282	35.088	0	C1203	77.78	A6802	66.1	A6802	0.6
High	LQHPDVAAY	1	1	1	P35221		0	1.34259e+07	0.007	0.02611	15.03	11.6262	2	1013.5	-0.590165	41.8947	0	C1203	48.15	B1503	2.4	B1503	0.01
High	ESSPFVERL	21	1	1	P14625		0	2.58318e+08	0.007	0.03515	14.81	16.7018	2	1063.54	0.130212	54.1237	0	C1203	81.48	A6802	108.2	A6802	0.8
High	IKHSGNITF	1	1	1	P30050		0	5.95696e+06	0.007	0.0277	14.02	16.7943	2	1016.55	0.444354	30.3555	0	C1203	40.74	B1503	4	B1503	0.03
High	GKYPSWTFY	1	1	1	P04040		0	9433205	0.007	0.02482	10.55	32.7662	2	1148.54	0.0383043	67.7265	0	C1203	48.15	B1503	8.6	B1503	0.17
High	AAYGNVIVA	1	1	1	Q8NFZ4		0	1.48748e+07	0.008	0.03835	34.75	0.160113	2	877.478	-0.20924	57.2636	0	C1203	59.26	C1203	60.8	C1203	0.3
High	IQHPSNVL	9	1	1	P14866		0	3.52278e+07	0.008	0.03938	31.23	0.265445	2	907.499	-0.202813	35.189	0	C1203	40	B1503	118.2	B1503	2.5
High	RTTEINFKV	4	2	2	P29762;P29373		0	2.80604e+07	0.008	0.03713	28.65	0.384608	2	1107.62	-0.29546	42.2661	0	C1203	70.37	A6802	74.6	A6802	0.6
High	RAFGGILVV	5	1	1	Q8NHX9		0	1.56096e+08	0.008	0.04011	26.05	0.251666	2	931.572	-0.247052	66.0977	0	C1203	92.59	C1203	8.7	C1203	0.01
High	VAYPEALTL	1	1	1	P48067		0	8.08994e+06	0.008	0.03892	25.86	0.990458	2	976.535	-0.115333	77.216	0	C1203	96.3	C1203	15.1	C1203	0.05
High	EIAQVVEKV	10	1	1	Q9BYK8		0	3.60772e+08	0.008	0.04008	25.06	0.923191	2	1014.58	-0.166565	47.1387	0	C1203	44.44	A6802	12.1	A6802	0.1
High	GKREGIDQSY	3	1	1	O94952		0	1.19071e+07	0.008	0.03899	24.46	1.31207	2	1152.56	-0.566561	24.6753	0	C1203	40	B1503	173	B1503	3
High	EIFPVSFHV	4	1	1	Q5THK1		0	2.23834e+07	0.008	0.03667	23.1	2.00173	2	1074.56	-0.0801472	78.1756	0	C1203	48.15	A6802	2.7	A6802	0.01
High	QQFPAFNSY	4	1	1	Q8N5U6		0	1.46539e+07	0.008	0.03793	21.2	1.57936	2	1101.5	-0.299512	70.4764	0	C1203	48.15	B1503	2.3	B1503	0.01
High	ETQKSIYYI	19	1	1	P08238		0	4.26479e+08	0.008	0.03786	21.13	3.29947	2	1144.59	-1.11437	51.646	0	C1203	62.96	A6802	12.3	A6802	0.1
High	RHKFPDEDSY	1	1	1	Q6VY07		0	8.39698e+06	0.008	0.03581	21.08	2.1843	3	1293.59	0.305761	29.4433	0	C1203	37.14	B1503	87.6	B1503	1.7
High	ASVDKVLEL	7	1	1	O14979		0	1.90857e+07	0.008	0.03785	21.07	2.55944	2	973.556	-0.111192	58.8056	0	C1203	85.19	C1203	98.8	C1203	0.5
High	EIYSFSESL	1	1	1	P13010		0	3.90963e+06	0.008	0.04032	18.73	3.39139	2	1074.5	-0.0580122	76.7139	0	C1203	44.44	A6802	19	A6802	0.17
High	RKHDDDRRF	1	3	3	P98168;P98169;Q2QGD7		0	2.1292e+06	0.008	0.03707	17.63	6.29327	3	1244.62	-0.235983	16.4267	0	C1203	37.04	B1503	192.8	B1503	3
High	RQAHLTNQY	1	1	1	P11940		0	5.76293e+06	0.008	0.036	16.6	8.94795	2	1130.57	-0.571122	23.0564	0	C1203	40.74	B1503	4.2	B1503	0.03
High	KKYGQPIQM	3	1	1	O95757		0	3.02773e+07	0.008	0.03551	14.78	8.80384	2	1092.59	-0.658978	30.7753	0	C1203	44.44	B1503	18.7	B1503	0.5
High	RKAPQHTAV	2	1	1	O43242		0	1.52142e+07	0.008	0.03757	14.28	7.93343	2	1007.57	-0.686994	16.706	0	C1203	48.15	B1503	104	B1503	1.9
High	AKHTNFVEF	2	1	1	P53680		0	2.43215e+07	0.008	0.04092	13.79	16.9159	2	1092.55	-0.802696	39.6093	0	C1203	40.74	B1503	8	B1503	0.15
High	GAFGKPSSL	3	1	1	Q8IVT2		0	9.04882e+06	0.009	0.04633	36.74	0.105865	2	863.462	0.016795	36.2436	0	C1203	85.19	C1203	61.9	C1203	0.3
High	DTTVIIWQV	3	1	1	Q9H7D7		0	3.69052e+07	0.009	0.04255	36.41	0.117423	2	1074.58	0.249633	94.6375	0	C1203	70.37	A6802	16.5	A6802	0.15
High	EVYVGDERV	12	1	1	O14976		0	2.4477e+07	0.009	0.04657	33.61	0.190841	2	1065.52	-0.454068	42.4214	0	C1203	40.74	A6802	22.5	A6802	0.25
High	IGAARTKTY	2	1	1	Q9Y3B1		0	4.47739e+06	0.009	0.04162	28.76	0.340729	2	980.552	-0.161789	20.9035	0	C1203	48.15	B1503	91.2	C1203	0.9
High	IASPVIAAV	4	1	1	Q6ZMZ0		0	1.68113e+07	0.009	0.04604	28.55	0.181947	2	840.519	0.202616	65.3237	0	C1203	88.89	C1203	11.1	C1203	0.03
High	TTSNTVSKL	1	1	1	Q6NZI2		0	1.49501e+07	0.009	0.04293	27.81	0.49491	2	950.515	-0.28306	26.067	0	C1203	74.07	A6802	219.5	A6802	1.3
High	HKRIHGVGF	4	1	1	P62899		0	4.94564e+07	0.009	0.04315	27.31	0.449682	2	1050.59	-0.787305	24.3439	0	C1203	33.33	B1503	23.9	B1503	0.6
High	GLASLVQVF	4	1	1	Q5T1A1		0	2.09419e+07	0.009	0.0413	26.99	0.57366	2	933.54	-0.902929	50.3462	0	C1203	44.44	B1503	19	B1503	0.5
High	RGFDKAYVV	1	1	1	O75531		0	22130302	0.009	0.04127	24.47	1.10237	2	1054.57	-0.00999195	37.9589	0	C1203	48.15	C1203	182.6	C1203	0.8
High	LKNGALVVY	1	1	1	Q8IVB5		0	1.76153e+07	0.009	0.04354	24.23	0.66717	2	976.582	-0.753195	47.833	0	C1203	48.15	B1503	6.1	B1503	0.08
High	IKPDGLLEF	2	1	1	Q15345		0	0	0.009	0.04375	21.94	2.65746	2	1031.58	-0.389185	69.844	0	C1203	40.74	B1503	192.4	B1503	3
High	TAVTVNQSL	7	1	1	P05787		0	3.67034e+07	0.009	0.04233	21.53	3.02778	2	932.505	-0.22209	47.8917	0	C1203	74.07	C1203	436.7	C1203	1.5
High	GKAFSRSSY	1	3	3	Q8N9K5;Q7L945;P17097		0	7.35137e+06	0.009	0.04566	21.03	2.95783	2	1002.5	-1.03354	23.2969	0	C1203	40.74	B1503	14.9	B1503	0.4
High	RKHNQRPTF	1	1	1	P21333		0	4.05011e+06	0.009	0.04474	20.91	2.34935	2	1183.64	-0.830617	18.2269	0	C1203	33.33	B1503	14.5	B1503	0.4
High	HQMTPSSSY	2	1	1	Q93074		0	8.9119e+06	0.009	0.04179	19.46	1.72351	2	1037.44	0.259664	29.3717	0	C1203	37.04	B1503	2.1	B1503	0.01
High	NVYEYVRKY	1	1	1	O95071		0	1.16193e+07	0.009	0.04572	18.73	6.55571	3	1233.63	0.316371	44.5532	0	C1203	51.85	C1203	110.9	C1203	0.5
High	RKVPFGKTY	2	1	1	Q9Y6C9		0	8.53167e+06	0.009	0.04602	18.66	2.16265	2	1095.63	-0.29067	25.8972	0	C1203	51.85	B1503	5.4	B1503	0.06
High	KSRPELLEY	2	1	1	Q14258		0	1.42492e+07	0.009	0.04134	17.54	7.2796	2	1134.61	-1.17223	39.3545	0	C1203	81.48	B1503	37.1	B1503	0.9
High	SKIKNALAH	1	1	1	P00846		0	2.04664e+06	0.009	0.0418	17.12	2.19902	2	981.584	-0.185854	19.5321	0	C1203	3.7	B1503	417.9	B1503	4.5
High	STAAVIQNV	2	1	1	Q6P4R8		0	1.15757e+07	0.009	0.04601	16.93	10.9231	2	902.494	-0.296087	48.4547	0	C1203	74.07	A6802	4.5	A6802	0.01
High	ETAKLIEKL	11	1	1	P13639		0	1223627224	0.009	0.04321	16.22	3.13639	2	1044.63	-0.993129	40.3998	0	C1203	74.07	A6802	26.7	A6802	0.25
High	RKYVNGSTY	3	1	1	Q6P2Q9		0	1.35459e+07	0.009	0.04213	15.81	10.5284	2	1087.55	-0.742592	23.6292	0	C1203	44.44	B1503	3.2	B1503	0.02
High	RKSLNSIEF	4	1	1	P78527		0	5.69034e+07	0.009	0.04652	15.53	8.43753	2	1093.6	-0.611254	39.4935	0	C1203	40.74	B1503	9.5	B1503	0.2
High	GKTIQTISF	2	2	2	O14646;O14647		0	4.7888e+06	0.009	0.04489	14.96	6.4102	2	994.555	-1.41251	51.2623	0	C1203	33.33	B1503	29.6	B1503	0.8
High	LRNQLQSVY	5	1	1	Q9BSM1		0	74314342	0.009	0.04639	14.81	11.3565	2	1120.61	-1.0463	40.7773	0	C1203	40.74	B1503	11.9	B1503	0.25
High	AAYGNRQNL	1	1	1	Q8NB46		0	1.08342e+07	0.009	0.04392	13.59	18.8113	2	1006.51	-0.711766	27.8204	0	C1203	85.19	C1203	80.9	C1203	0.4
Medium	TTTQITKTV	9	1	1	P11171		0	3.81539e+07	0.01	0.0533	36.96	0.0426305	2	992.563	0.452772	29.3608	0	C1203	74.07	A6802	44.9	A6802	0.4
Medium	HSAAPSPQV	3	1	1	Q92614		0	1.83423e+07	0.01	0.05294	33.44	0.194814	2	893.447	-0.174611	26.6984	0	C1203	70.37	A6802	31.7	A6802	0.3
Medium	ETADVKASV	5	1	1	Q8N1F7		0	3.10939e+07	0.01	0.05194	33.15	0.208146	2	919.473	-0.0219747	29.2739	0	C1203	74.07	A6802	2.2	A6802	0.01
Medium	NVAEINRQV	1	1	1	O43933		0	9.80344e+06	0.01	0.04903	28.95	0.400644	2	1042.56	-0.837695	34.2943	0	C1203	48.15	A6802	10.3	A6802	0.08
Medium	HKSPDGRTY	2	1	1	O75400		0	5.10035e+06	0.01	0.0472	26.89	0.818169	2	1060.52	-0.61883	17.2068	0	C1203	55.56	B1503	23.2	B1503	0.6
Medium	FTAKVNIEV	2	1	1	Q9P015		0	8.08985e+06	0.01	0.05299	25.1	1.02691	2	1020.57	-0.214695	55.9093	0	C1203	81.48	A6802	3.6	A6802	0.01
Medium	GKAPNILLY	1	1	1	P50747		0	1.6422e+07	0.01	0.05169	24.73	0.922042	2	988.582	-0.620572	57.3109	0	C1203	55.56	B1503	12	B1503	0.3
Medium	GKKGPQSLF	8	1	1	P46087		0	4.40238e+07	0.01	0.05079	24.14	1.18207	2	961.546	-0.544117	30.0412	0	C1203	33.33	B1503	99.4	B1503	1.9
Medium	LQQTGVLGAF	2	1	1	P55268		0	4.6896e+07	0.01	0.05045	23.05	1.99988	2	1033.57	-0.281441	44.5865	0	C1203	34.29	B1503	6	B1503	0.08
Medium	RKKVGLTGF	2	2	2	O76080;Q6FIF0		0	7.6362e+06	0.01	0.05327	22.95	0.267438	2	1005.62	-0.993354	27.1662	0	C1203	29.63	B1503	35	B1503	0.9
Medium	RKDDPRLSF	6	1	1	P78527		0	1.73345e+08	0.01	0.05095	21.57	2.6646	2	1133.6	-1.17793	31.6541	0	C1203	37.04	B1503	76.8	B1503	1.6
Medium	EAFHYIFNV	2	1	1	Q9UEY8		0	3.31138e+08	0.01	0.05134	20.57	2.67134	2	1139.55	-0.322898	74.7758	0	C1203	81.48	A6802	3.5	A6802	0.01
Medium	SQFPQPQHF	1	1	1	Q9P215		0	1.31111e+07	0.01	0.05008	19.59	3.16788	2	1115.53	-0.217272	48.8116	0	C1203	44.44	B1503	2.8	B1503	0.01
Medium	EVFGLFQKL	4	1	1	P15924		0	2.19834e+07	0.01	0.04977	18.84	3.16942	2	1080.61	0.180535	79.2668	0	C1203	44.44	A6802	30.7	A6802	0.3
Medium	AQAPAQSQF	3	1	1	Q92793		0	1.11671e+07	0.01	0.0533	18.72	5.43753	2	947.458	0.0170789	38.0785	0	C1203	44.44	B1503	3.7	B1503	0.03
Medium	QFTGIKKY	4	1	1	Q96IX5		0	2.31843e+07	0.01	0.0475	18.22	4.54016	2	984.551	-0.3142	42.6669	0	C1203	33.33	B1503	208.3	B1503	3
Medium	KGFAFVEY	2	1	1	Q9UHX1		0	8.24738e+06	0.01	0.05361	17.72	7.454	2	960.482	-0.878984	61.656	0	C1203	40	B1503	237.5	B1503	3.5
Medium	GKRLDVTGF	2	1	1	Q9UIY3		0	1.64483e+07	0.01	0.04949	17.56	4.70742	2	992.554	1.48033	37.2227	0	C1203	33.33	B1503	77.6	B1503	1.6
Medium	RKRPVPKGATY	3	1	1	P61313		0	4.40996e+07	0.01	0.05163	17.1	3.21822	2	1272.75	0.108747	19.1804	0		0	B1503	142.7	B1503	2.5
Medium	QFETKKLY	2	1	1	O60613		0	1.75602e+07	0.01	0.04832	17.01	6.78322	2	1056.57	-0.361752	36.1276	0	C1203	30	B1503	357.6	B1503	4
Medium	HQKLGIAY	4	1	1	Q9HB58		0	3.00232e+07	0.01	0.04756	16.47	7.01068	2	929.519	-1.42199	33.3491	0	C1203	36.67	B1503	32.3	B1503	0.8
Medium	KKNPSSVKF	2	1	1	Q08AM6		0	3.34707e+06	0.01	0.0475	16.34	5.06357	2	1034.6	-0.884429	19.9901	0	C1203	40.74	B1503	8.7	B1503	0.17
Medium	KKYPEKLYF	1	1	1	Q9ULK4		0	2.21429e+07	0.01	0.05357	14.45	10.6546	3	1215.68	-0.27743	36.7793	0	C1203	44.44	B1503	7.5	B1503	0.12
Medium	EIFSRGPYSV	2	1	1	Q7LBC6		0	2.07049e+07	0.01	0.0511	13.34	17.9261	2	1154.58	-0.15711	57.499	0	C1203	40	A6802	25.9	A6802	0.25
Medium	RHRDPQLFY	1	1	1	Q9P253		0	3.76314e+07	0.01	0.04945	12.98	25.4343	3	1231.63	-0.231534	33.5544	0	C1203	44.44	B1503	20.1	B1503	0.5
Medium	TTSHLHQAV	3	1	1	P22695		0	8.3497e+06	0.011	0.05488	40.48	0.0367502	2	993.511	-0.331595	19.7068	0	C1203	70.37	A6802	13.2	A6802	0.12
Medium	SKSGGDYAY	3	3	3	Q9GIP4;Q8MH63;Q01650		0	1.63122e+07	0.011	0.0562	27.55	0.384634	2	947.41	-0.270649	25.4577	0	C1203	44.44	B1503	26	B1503	0.7
Medium	QAYSGIQQY	4	2	2	Q92879;O95319		0	20429371	0.011	0.05484	25.95	0.748825	2	1057.49	-0.106596	48.8363	0	C1203	85.19	B1503	12.6	C1203	0.15
Medium	SQANIAQVL	1	2	2	Q10567;P63010		0	3.12035e+06	0.011	0.05543	25.33	1.21163	2	943.521	0.234608	61.191	0	C1203	44.44	B1503	9.8	B1503	0.2
Medium	ETVGILHKV	9	1	1	Q96HH9		0	6.66886e+07	0.011	0.05623	23.16	0.646816	2	995.588	-0.147516	35.6464	0	C1203	70.37	A6802	2.3	A6802	0.01
Medium	ETQNVVTKV	4	1	1	Q96MW1		0	3.8157e+07	0.011	0.0544	21.08	3.29751	2	1017.56	0.421265	31.4739	0	C1203	70.37	A6802	22.4	A6802	0.25
Medium	GKSDPFLVF	1	3	3	Q9HCH3;Q86YQ8;Q8IYJ1		0	9.91865e+06	0.011	0.05465	20.48	3.87335	2	1009.54	0.146329	72.7952	0	C1203	44.44	B1503	8.5	B1503	0.15
Medium	AQRQDIAFAY	1	1	1	P07355		0	1.96184e+07	0.011	0.05537	17.06	7.14638	2	1182.59	0.220195	52.098	0	C1203	31.43	B1503	8.4	B1503	0.15
Medium	VQRKGTTSY	1	2	2	Q14186;Q14188		0	1.9981e+06	0.011	0.0543	16.52	7.95217	2	1039.55	-0.19937	17.6849	0	C1203	40.74	B1503	2.8	B1503	0.01
Medium	ETFYIGKLI	4	1	1	Q7KZ85		0	1.26048e+07	0.011	0.05516	15.18	6.7322	2	1083.61	-0.285532	75.7565	0	C1203	66.67	A6802	19.4	A6802	0.17
Medium	RQHAKNRYY	1	1	1	O96000		0	3.7479e+06	0.011	0.05475	12.84	24.7414	3	1235.64	0.093552	17.3674	0	C1203	40.74	B1503	3.8	B1503	0.03
Medium	EVASNVPKV	2	1	1	Q9Y5A9		0	1.29774e+07	0.012	0.05838	33.43	0.141811	2	942.525	-0.670956	36.5306	0	C1203	48.15	A6802	12	A6802	0.1
Medium	LKSPGSVVF	3	1	1	O75787		0	2.09419e+07	0.012	0.05664	31.73	0.196124	2	933.54	-0.445266	50.3658	0	C1203	48.15	B1503	4	B1503	0.03
Medium	RKIKQGLGL	2	1	1	P00966		0	1.09991e+07	0.012	0.05831	29.72	0.0438371	2	1012.66	-0.468395	25.2216	0	C1203	40.74	B1503	33.3	B1503	0.8
Medium	EIAAVIETV	11	1	1	Q7Z4G1		0	2.78688e+08	0.012	0.05782	28.57	0.438669	2	944.53	-0.244159	71.0745	0	C1203	48.15	A6802	4	A6802	0.01
Medium	EVSLPSVEV	3	1	1	Q8IVF2		0	1.36151e+07	0.012	0.05744	27.83	0.615424	2	958.509	-0.125714	73.1161	0	C1203	48.15	A6802	7.5	A6802	0.05
Medium	HKRPGEPNM	1	1	1	Q9UL03		0	2.97847e+06	0.012	0.05676	22.23	2.76017	2	1065.53	-0.0721384	18.9976	0	C1203	37.04	B1503	310.5	B1503	4
Medium	RSVDIINML	1	1	1	Q709C8		0	7.03673e+06	0.012	0.05816	21.54	2.5319	2	1060.58	-0.272173	71.5329	0	C1203	74.07	C1203	58.2	C1203	0.3
Medium	KHADPRIQGY	1	1	1	Q9BW60		0	7.00308e+06	0.012	0.05762	20.64	2.89831	2	1184.62	-0.522214	24.5391	0	C1203	42.86	B1503	102.8	B1503	1.9
Medium	RKSGVGNVF	1	2	2	Q13310;Q5JQF8		0	1.86705e+07	0.012	0.05735	20.39	2.37395	2	963.536	-0.628635	27.8519	0	C1203	40.74	B1503	6.8	B1503	0.12
Medium	AMYSRKAMY	1	1	1	Q02878		0	8.39413e+06	0.012	0.05897	20.29	3.43762	2	1120.53	-0.292613	30.6442	0	C1203	48.15	B1503	10.5	B1503	0.25
Medium	FSAGEPRVL	4	1	1	Q9BRA0		0	3.86202e+07	0.012	0.05881	19.66	5.09518	2	975.525	-0.433691	47.6063	0	C1203	88.89	C1203	33	C1203	0.15
Medium	YQTAPKAGY	2	1	1	Q96KR1		0	6.36133e+06	0.012	0.05698	18.92	5.00942	2	998.495	0.485936	29.8519	0	C1203	40.74	B1503	6.6	B1503	0.1
Medium	GQRPTQPVY	5	1	1	Q9H0W8		0	54891463	0.012	0.05911	18.22	6.42191	2	1045.54	-0.255727	29.3736	0	C1203	48.15	B1503	4.7	B1503	0.05
Medium	EASSVKNEL	2	1	1	Q9P2D1		0	1.64342e+07	0.012	0.05732	17.92	7.59394	2	976.495	-0.0582341	29.0025	0	C1203	85.19	A6802	223.2	A6802	1.3
Medium	RAVALSLLLY	1	1	1	Q8IY34		0	1.79692e+07	0.012	0.05685	17.79	1.00054	2	1118.69	-0.624674	52.2055	0	C1203	60	B1503	32.4	B1503	0.8
Medium	RQPDSPTALY	7	1	1	Q9BQG0		0	8.4743e+07	0.012	0.05661	16.28	10.1008	2	1147.57	-0.199631	43.0492	0	C1203	34.29	B1503	14	B1503	0.4
Medium	FTFGSKVTY	6	1	1	Q4LDE5		0	2.04732e+07	0.012	0.05752	14.72	16.3213	2	1049.53	-0.864031	56.4986	0	C1203	85.19	C1203	9.7	C1203	0.02
Medium	YSADGHSIL	1	1	1	Q15269		0	1.58953e+07	0.012	0.05773	13.56	20.4395	2	962.458	-0.31711	46.552	0	C1203	77.78	C1203	13.9	C1203	0.04
Medium	RQFWFQGNRY	1	1	1	Q9C0B1		0	8.96962e+06	0.012	0.05862	11.74	29.6658	3	1401.68	-0.584879	51.5199	0	C1203	40	B1503	5.7	B1503	0.07
Medium	RKSDERLTAF	1	1	1	O75438		0	3.9756e+06	0.012	0.05839	11.49	24.5017	3	1222.65	-0.563451	28.3241	0	C1203	34.29	B1503	32.5	B1503	0.8
Medium	RKYDEVLHm	1	1	1	P53621	M9(Oxidation)	0	885414	0.012	0.05729	10.68	29.5639	3	1206.59	-0.31615	28.0135	0	C1203	44.44	B1503	9.5	B1503	0.2
Medium	MKLLLALAGL	2	1	1	P05164		0	4.37187e+07	0.013	0.05973	39.28	0.00944257	2	1042.67	-3.75809	82.3483	0	C1203	28.57	B1503	135.9	B1503	2.5
Medium	KKTGKTVSY	1	1	1	O00244		0	1.56971e+07	0.013	0.06413	35.95	0.0422564	2	1011.58	-4.75741	16.9716	0	C1203	44.44	B1503	19.2	B1503	0.5
Medium	DTFRGVAFV	12	1	1	O15067		0	1.97146e+08	0.013	0.06423	31.98	0.236338	2	1011.53	-0.357916	66.1322	0	C1203	74.07	A6802	3.7	A6802	0.01
Medium	EAASILQEL	1	1	1	O00232		0	1.3336e+07	0.013	0.0659	31.41	0.297167	2	973.52	-0.536662	80.1452	0	C1203	85.19	A6802	27	A6802	0.25
Medium	SAFATPFLV	5	1	1	P15954		0	1.31933e+08	0.013	0.06699	31.07	0.302451	2	952.513	-0.628939	88.9921	0	C1203	81.48	A6802	16.1	C1203	0.08
Medium	ETSTVITHV	6	1	1	Q8WXI7		0	6.27401e+07	0.013	0.06028	29.19	0.460444	2	986.515	-0.272731	36.8433	0	C1203	74.07	A6802	3.2	A6802	0.01
Medium	TTFGSRVNV	2	1	1	Q9P265		0	2.41573e+07	0.013	0.06009	28.04	0.575931	2	980.515	-0.843416	39.2541	0	C1203	77.78	A6802	5.6	A6802	0.03
Medium	VAFSQVLTI	1	1	1	Q13487		0	8.08575e+06	0.013	0.06363	25.05	0.750415	2	977.566	-0.201982	86.1816	0	C1203	88.89	C1203	13.1	C1203	0.04
Medium	ELSNVLAAM	8	1	1	Q9Y3U8		0	1.39048e+07	0.013	0.05961	24.03	2.02013	2	947.486	-0.408039	77.7503	0	C1203	33.33	A6802	96	A6802	0.8
Medium	RKKDGQVTF	3	1	1	Q9BW60		0	2.17906e+07	0.013	0.06502	23.89	1.03754	2	1078.6	-0.255929	20.1669	0	C1203	40.74	B1503	13.9	B1503	0.4
Medium	IKKDVDEAY	1	1	1	P05787		0	5.03648e+06	0.013	0.06123	20.66	3.19081	2	1080.56	-0.145171	25.7852	0	C1203	40.74	B1503	63.6	B1503	1.4
Medium	QTFPNVREM	2	1	1	Q99958		0	21487009	0.013	0.06505	20.49	2.86974	2	1121.54	-0.58185	50.9054	0	C1203	81.48	C1203	19.5	C1203	0.07
Medium	EVAMMPHLV	2	1	1	Q53EP0		0	1.15391e+07	0.013	0.06502	20.07	3.00714	2	1026.51	-0.590013	63.4802	0	C1203	44.44	A6802	6.5	A6802	0.04
Medium	RKRHPNVHF	1	1	1	Q8TDB6		0	3.53702e+06	0.013	0.06112	19.86	2.74508	2	1190.66	-0.785268	19.3676	0	C1203	33.33	B1503	17.1	B1503	0.5
Medium	EAMELIVKL	1	1	1	Q9BVS4		0	4.80937e+06	0.013	0.06543	19.8	2.76233	2	1045.6	-0.254817	73.1267	0	C1203	85.19	A6802	43.4	A6802	0.4
Medium	NSYPHQLYT	3	1	1	Q8IZD2		0	23032043	0.013	0.06717	18.42	4.39049	2	1122.52	-0.906851	40.5558	0	C1203	44.44	C1203	340.4	C1203	1.3
Medium	KKFHGYFKF	1	1	1	P36639		0	4.01744e+06	0.013	0.06666	15.79	12.0019	3	1201.65	-0.0293779	33.9227	0	C1203	33.33	B1503	6.8	B1503	0.12
Medium	EAAELMQQV	4	1	1	Q15691		0	1.2722e+07	0.013	0.06621	14.11	14.6022	2	1018.49	-0.317289	58.2189	0	C1203	81.48	A6802	8.4	A6802	0.06
Medium	RKRSRKESY	1	15	15	P33778;P62807;P58876;Q93079;P06899;O60814;Q99880;Q99879;Q99877;P23527;Q6DN03;Q6DRA6;Q16778;Q5QNW6;P57053		0	989445	0.013	0.06442	10.34	16.8295	2	1209.68	-0.439545	15.7318	0	C1203	40.74	B1503	101.7	B1503	1.9
Medium	KKMDKTAKL	1	1	1	Q9GZR7		0	2.67354e+06	0.014	0.07113	34.85	0.0461878	2	1062.63	-0.537203	17.027	0	C1203	40.74	B1503	182.5	B1503	3
Medium	DVTAIIFVV	9	2	2	Q5JWF2;P63092		0	1.18787e+08	0.014	0.06848	28.04	0.305907	2	976.571	-0.826423	106.908	0	C1203	44.44	A6802	14.6	A6802	0.12
Medium	NTYGFPIIF	6	1	1	P11498		0	2.2124e+07	0.014	0.06831	27.88	0.608624	2	1071.55	-0.607281	100.719	0	C1203	74.07	C1203	39.9	C1203	0.2
Medium	EVMSVIAQV	3	1	1	Q96QP1		0	1.62649e+07	0.014	0.06996	25.34	1.33049	2	975.518	-0.447569	72.2543	0	C1203	44.44	A6802	3	A6802	0.01
Medium	ETIGVVHLV	6	1	1	Q63HN8		0	9.29795e+07	0.014	0.06848	22.56	1.06987	2	966.561	-0.467983	60.74	0	C1203	74.07	A6802	2.1	A6802	0.01
Medium	ETSKYYVTI	9	2	2	P68104;Q5VTE0		0	64488214	0.014	0.0737	21.6	2.73066	2	1103.56	-0.768915	52.5746	0	C1203	70.37	A6802	12.1	A6802	0.1
Medium	ESFIKAIGV	4	1	1	Q9NRN7		0	1.01914e+07	0.014	0.07255	19.02	3.69614	2	963.551	0.380743	63.7184	0	C1203	74.07	A6802	10.4	A6802	0.08
Medium	GKVFRHNSY	1	3	3	Q9HCG1;Q96SE7;Q9H7R5		0	1.63478e+06	0.014	0.07361	16.82	9.63212	2	1107.57	-0.594198	20.318	0	C1203	37.04	B1503	32.4	B1503	0.8
Medium	SKMGKQLTY	3	1	1	O00115		0	1.02996e+07	0.014	0.0717	16.42	7.82613	2	1055.55	-0.890851	26.8806	0	C1203	48.15	B1503	7.8	B1503	0.15
Medium	RAYDGTTYL	7	1	1	Q53GS9		0	63613298	0.014	0.06909	15.26	11.5864	2	1059.51	-0.0242134	45.226	0	C1203	81.48	C1203	4.5	C1203	0.01
Medium	EVSNTFVRL	4	1	1	Q9BUI4		0	5.30517e+07	0.014	0.06966	15.09	11.6447	2	1064.57	-0.226864	56.8871	0	C1203	44.44	A6802	29.1	A6802	0.3
Medium	VKFDAVIGY	2	1	1	Q8NBQ5		0	6.39247e+06	0.014	0.07146	14.08	12.4131	2	1011.55	-0.411835	63.5628	0	C1203	55.56	B1503	10.4	B1503	0.25
Medium	AKAQALVQY	1	1	1	Q9Y2Q5		0	1.25516e+07	0.014	0.07184	13.28	14.8087	2	991.556	-1.01093	38.7874	0	C1203	48.15	B1503	13.6	B1503	0.4
Medium	AAAPHTVSY	2	1	1	O75907		0	7.35513e+06	0.015	0.0793	35.77	0.114362	2	916.452	0.118803	29.8833	0	C1203	92.59	B1503	5.4	C1203	0.04
Medium	HTANIQTLI	1	1	1	Q8NG31		0	2.50517e+08	0.015	0.07655	33.35	0.118716	2	1010.56	-0.399482	52.2389	0	C1203	62.96	A6802	6.3	A6802	0.03
Medium	KKVSKAAIL	1	1	1	O00767		0	5.06436e+06	0.015	0.08139	30.95	0.017557	2	957.645	-0.345707	20.8966	0	C1203	40.74	B1503	65.6	B1503	1.4
Medium	TVFSHAQTV	10	2	2	Q71UM5;P42677		0	1.2509e+08	0.015	0.07844	28.16	0.708638	2	989.504	-1.46804	35.4374	0	C1203	48.15	C1203	18	C1203	0.06
Medium	AQHLFIQTF	1	1	1	Q14684		0	4.91e+06	0.015	0.07924	27.22	0.744078	2	1104.58	-0.133632	65.7685	0	C1203	40.74	B1503	2.9	B1503	0.01
Medium	EVYPGTYSV	5	1	1	Q9NQ31		0	3.44448e+07	0.015	0.07504	25.86	0.702633	2	1014.48	-0.461069	59.3238	0	C1203	48.15	A6802	2.4	A6802	0.01
Medium	HSSGINVNA	2	1	1	Q14444		0	3.68544e+08	0.015	0.07679	24.76	0.965155	2	898.437	-0.838142	26.3818	0	C1203	40.74	A6802	54.6	A6802	0.5
Medium	SVFPGARLL	1	1	1	Q86X55		0	2.01421e+07	0.015	0.07702	22.79	1.33661	2	959.567	-0.532782	64.781	0	C1203	51.85	C1203	18.6	C1203	0.07
Medium	KKLQQTQEY	2	2	2	P42229;P51692		0	2.51667e+06	0.015	0.07976	19.64	3.58792	2	1165.62	-0.0428538	21.0335	0	C1203	40.74	B1503	22.7	B1503	0.6
Medium	ETSSIMQKL	11	1	1	Q5VT06		0	93453104	0.015	0.07816	18.8	5.51031	2	1036.53	-0.374473	47.9744	0	C1203	74.07	A6802	22.9	A6802	0.25
Medium	HQHLSKESM	1	1	1	Q14839		0	0	0.015	0.07676	18.59	4.12026	2	1096.52	-0.897861	18.7113	0	C1203	29.63	B1503	19.2	B1503	0.5
Medium	EVIKELAQI	4	1	1	O15355		0	1.42209e+07	0.015	0.08134	16.74	4.44856	2	1042.61	-0.736908	60.1604	0	C1203	29.63	A6802	18.4	A6802	0.17
Medium	FTAKVWDAV	1	1	1	Q9Y3F4		0	1.06774e+07	0.015	0.07834	15.17	14.1492	2	1036.55	-0.304148	61.2187	0	C1203	74.07	A6802	3.4	A6802	0.01
Medium	AQRYLLQY	2	1	1	P25789		0	1.51889e+07	0.015	0.07926	14.89	9.88101	2	1054.57	-1.37059	52.3845	0	C1203	26.67	B1503	45.9	B1503	1.1
Medium	AAIDHQIEV	5	1	1	Q9Y485		0	6.02051e+07	0.015	0.08143	13.09	17.4223	2	995.515	-0.744462	44.2868	0	C1203	88.89	C1203	35.4	C1203	0.17
Medium	RKITTYVSF	1	1	1	Q9UPT9		0	1.58327e+07	0.015	0.07392	11.05	27.5657	2	1114.62	-0.88997	46.2733	0	C1203	33.33	B1503	3.5	B1503	0.02
Medium	SAADIPINI	2	1	1	P21333		0	9.53093e+06	0.015	0.0757	11.04	25.0831	2	913.499	-0.358523	73.6933	0	C1203	81.48	C1203	41.7	C1203	0.2
Medium	EVAKMIQEV	1	1	1	Q9NRD5		0	4.39922e+07	0.015	0.07725	10.21	41.6658	2	1046.56	-0.0191011	48.3853	0	C1203	48.15	A6802	8.6	A6802	0.06
Medium	QQIRSQKGY	1	1	1	O15050		0	5.59742e+08	0.016	0.08954	33.06	0.159044	2	1107.59	2.26065	26.3514	0	C1203	40.74	B1503	19.9	B1503	0.5
Medium	RQGTPLIAF	9	1	1	Q2NL82		0	7.8739e+07	0.016	0.08361	32.28	0.169335	2	1002.57	-1.13034	59.2278	0	C1203	33.33	B1503	3.8	B1503	0.03
Medium	EVSKAIINI	2	1	1	Q9NXP7		0	5.27366e+07	0.016	0.08798	29.55	0.305578	2	986.588	0.185624	54.4045	0	C1203	40.74	A6802	19.1	A6802	0.17
Medium	KQFGNILIL	2	1	1	P52788		0	2.5263e+07	0.016	0.08296	27.12	0.208548	2	1045.64	-0.760552	71.4522	0	C1203	51.85	B1503	4.3	B1503	0.04
Medium	YKIPYTTVL	1	1	1	Q08945		0	4.50388e+06	0.016	0.08385	23.44	0.837861	2	1097.62	-0.842508	66.1587	0	C1203	51.85	B1503	8	B1503	0.15
Medium	EAIGNPHHV	1	1	1	Q14146		0	1.52196e+07	0.016	0.08246	23.43	1.84096	2	973.485	-0.00857711	22.1055	0	C1203	81.48	A6802	25.5	A6802	0.25
Medium	TTTHITKTV	3	2	2	O43491;Q9Y2J2		0	1.22303e+07	0.016	0.0822	21.09	3.24169	2	1001.56	-0.429242	21.4224	0	C1203	74.07	A6802	19.2	A6802	0.17
Medium	EVISKTPTL	2	1	1	Q8IUR6		0	3.33157e+07	0.016	0.0821	19.87	2.83459	2	987.572	-0.186606	44.954	0	C1203	44.44	A6802	84.5	A6802	0.7
Medium	AALTFPVLF	5	1	1	Q05D32		0	1.55833e+07	0.016	0.0901	18.82	3.40778	2	978.565	-0.775819	103.588	0	C1203	77.78	B1503	26.2	B1503	0.7
Medium	SAGPGHSEL	2	1	1	Q7Z7M0		0	1.3329e+07	0.016	0.08593	17.88	4.83249	2	854.4	-0.208628	24.1799	0	C1203	85.19	C1203	606.1	C1203	1.9
Medium	RHSDIVVLY	1	1	1	Q6PCD5		0	6.01827e+06	0.016	0.08211	16.25	8.71954	2	1101.6	-0.4443	46.0405	0	C1203	51.85	B1503	15.3	B1503	0.4
Medium	RKMEIYRPH	1	2	2	Q13547;Q92769		0	7.28005e+06	0.016	0.08261	15.87	9.91286	3	1229.66	0.131325	23.515	0	C1203	7.41	B1503	80.7	B1503	1.6
Medium	EVAGIINDA	9	1	1	Q14008		0	5.21936e+07	0.017	0.09026	33.96	0.172328	2	901.463	0.384845	55.1292	0	C1203	11.11	A6802	11.6	A6802	0.09
Medium	MAGPLRAPL	3	1	1	P01034		0	1.24684e+07	0.017	0.09815	30.35	0.104481	2	925.529	-0.0606601	52.2104	0	C1203	81.48	C1203	92.8	C1203	0.5
Medium	AKKDSKYAY	1	1	1	P30876		0	1.77399e+06	0.017	0.09706	25.77	1.36994	2	1073.56	-0.400454	17.858	0	C1203	44.44	B1503	65.8	B1503	1.4
Medium	EAVSVIQSI	9	1	1	Q9P035		0	4.29046e+07	0.017	0.09331	25.49	1.12487	2	945.525	-0.244687	67.4395	0	C1203	74.07	A6802	29.9	A6802	0.3
Medium	KKREAEEVY	2	1	1	Q9Y383		0	9.32663e+06	0.017	0.09625	24.05	1.37506	2	1151.6	-0.569034	18.9073	0	C1203	44.44	B1503	19	B1503	0.5
Medium	ELGGIIAEV	3	1	1	Q96RL7		0	1.0993e+07	0.017	0.09051	23.96	1.31526	2	900.503	-0.769546	77.7124	0	C1203	48.15	A6802	74	A6802	0.6
Medium	AATKIINEV	4	1	1	P55145		0	1.16365e+07	0.017	0.09804	22.47	2.05856	2	958.556	-0.4572	38.4095	0	C1203	85.19	C1203	257.8	C1203	1
Medium	GKNQPSKTY	1	1	1	Q96BD6		0	1.05953e+06	0.017	0.09076	19.36	4.62874	2	1022.53	-0.799883	16.7699	0	C1203	44.44	B1503	32.8	B1503	0.8
Medium	RKLAAVTY	1	1	1	Q16181		0	4.44866e+06	0.017	0.09049	19.35	1.57725	2	921.551	-1.03578	28.1303	0	C1203	26.67	B1503	76.4	B1503	1.6
Medium	HKGRGQLVY	1	1	1	Q9BX59		0	4.57685e+07	0.017	0.09558	19.33	4.18885	2	1057.59	-0.495553	21.5438	0	C1203	44.44	B1503	26.9	B1503	0.7
Medium	TTSAVTVKS	1	1	1	P61513		0	9.80616e+06	0.017	0.09324	16.71	4.90707	2	893.494	-0.191784	22.2038	0	C1203	37.04	A6802	293.5	A6802	1.6
Medium	NAYPYCRTI	1	1	1	P48739		0	2.25076e+07	0.017	0.09306	15.83	7.24744	2	1100.52	0.0867576	48.7431	0	C1203	85.19	C1203	56.8	C1203	0.25
Medium	KQYKVVVY	3	1	1	P08754		0	2.69994e+07	0.017	0.09708	15.56	6.16957	2	1026.6	-0.780824	33.4338	0	C1203	30	B1503	6.9	B1503	0.12
Medium	EVSEIHIKV	2	1	1	P30414		0	2.1634e+07	0.017	0.0949	15.19	5.8707	2	1053.59	-1.28551	42.8932	0	C1203	48.15	A6802	4.6	A6802	0.01
Medium	EISDIHTKL	2	1	1	Q9UHD2		0	2.33155e+07	0.017	0.09426	15.07	8.80305	2	1055.57	-0.831849	36.7537	0	C1203	44.44	A6802	42.2	A6802	0.4
Medium	FTADKYHVV	3	1	1	Q8TED0		0	8.81453e+06	0.017	0.09614	13.81	17.1646	2	1079.55	-0.793145	37.7119	0	C1203	81.48	A6802	4.6	A6802	0.01
Medium	ETANKIFMV	1	1	1	Q14680		0	3.15924e+07	0.017	0.098	11.93	24.5872	2	1052.54	-0.64649	57.0548	0	C1203	74.07	A6802	2.9	A6802	0.01
Medium	ALYQAGQLTL	1	1	1	Q86TP1		0	8.24014e+06	0.017	0.09297	11.26	26.5825	2	1077.59	0.111767	64.9794	0	C1203	37.14	B1503	250.9	B1503	3.5
Medium	STAGTDITVNSV	1	1	1	Q2TAY7		0	1.26069e+07	0.018	0.1055	28.73	0.538349	2	1164.57	0.581732	58.5274	0		0	A6802	189	A6802	1.2
Medium	NIANHFFTV	7	1	1	Q16222		0	2.49836e+07	0.018	0.1064	27.94	0.692029	2	1062.54	-1.10231	64.8429	0	C1203	44.44	A6802	7.1	A6802	0.04
Medium	FLEVAQITL	1	1	1	Q92786		0	8.79581e+06	0.018	0.1007	23.65	1.05183	2	1033.59	-0.284836	73.4435	0	C1203	48.15	C1203	553.3	C1203	1.8
Medium	AAFHEEFVV	2	1	1	P51114		0	1.47823e+08	0.018	0.105	23.25	1.99102	2	1048.51	-0.870349	59.114	0	C1203	85.19	C1203	471.8	C1203	1.6
Medium	AAIGLVIYY	1	1	1	P51571		0	5.25414e+07	0.018	0.1026	21.08	1.57877	2	982.561	0.0797401	88.7362	0	C1203	88.89	B1503	61.6	C1203	0.6
Medium	QVANVRFNV	1	1	1	P30154		0	5.4179e+07	0.018	0.1033	20.62	3.3417	2	1046.57	-0.521036	50.5963	0	C1203	40.74	A6802	4.6	A6802	0.01
Medium	TVSGYEAKV	2	1	1	Q6ZTN6		0	6.85738e+06	0.018	0.1016	20.45	3.39396	2	953.491	-2.80422	74.9207	0	C1203	44.44	A6802	62.1	A6802	0.6
Medium	EAVDLITRL	2	1	1	Q9P0M9		0	1.06867e+07	0.018	0.09976	17.26	6.12469	2	1029.59	-0.495256	66.8949	0	C1203	81.48	A6802	91.5	A6802	0.7
Medium	EVLRVTHEL	2	1	1	P17980		0	2.76996e+07	0.018	0.09879	15.88	6.14965	2	1095.62	-0.187279	40.1533	0	C1203	40.74	A6802	21.7	A6802	0.2
Medium	TSYPDPILL	4	1	1	P50591		0	3.29662e+07	0.018	0.09982	15.34	12.3165	2	1018.55	-0.171401	83.1728	0	C1203	85.19	C1203	34.2	C1203	0.15
Medium	NSSPVINHL	1	1	1	Q9Y2I9		0	1.50687e+07	0.019	0.1173	29.47	0.34504	2	980.515	-1.51795	40.37	0	C1203	81.48	A6802	53.6	A6802	0.5
Medium	EAADVLIKA	7	1	1	Q7Z6Z7		0	9.27813e+07	0.019	0.1122	26.69	0.794262	2	929.53	-0.613875	45.9377	0	C1203	48.15	A6802	12.6	A6802	0.1
Medium	KASGKYYAm	1	1	1	Q9Y243	M9(Oxidation)	0	1.57283e+07	0.019	0.1127	26.67	1.06304	2	1034.5	-0.207104	47.4614	0	C1203	74.07	B1503	93.8	C1203	0.7
Medium	RQIVSGLKY	1	1	1	Q9NYY3		0	11150928	0.019	0.1107	24.13	0.610267	2	1063.63	-0.793232	38.6809	0	C1203	40.74	B1503	3.6	B1503	0.03
Medium	KAVGHPFVI	4	1	1	O14980		0	1.3882e+08	0.019	0.111	22.3	0.81231	2	967.572	-0.479848	39.1484	0	C1203	77.78	C1203	67.5	C1203	0.3
Medium	AKIVAIKEF	4	1	1	Q9BXT8		0	1.52547e+08	0.019	0.1087	19.26	1.05118	2	1018.63	-0.755448	40.4802	0	C1203	44.44	B1503	16.6	B1503	0.4
Medium	QQVPVNQVF	1	1	1	P39023		0	1.07584e+07	0.019	0.114	17.65	7.55364	2	1058.56	-0.275497	61.9876	0	C1203	40.74	B1503	4.5	B1503	0.04
Medium	EVVHTPETSV	5	1	1	O15427		0	4.03544e+07	0.019	0.1086	15.66	9.1544	2	1097.55	-0.631264	38.7449	0	C1203	25.71	A6802	83.1	A6802	0.7
Medium	LGNLLHVDF	1	1	1	P10635		0	3.48316e+07	0.019	0.1199	15.46	9.42939	2	1027.56	-0.331861	65.602	0	C1203	33.33	B1503	226.9	B1503	3.5
Medium	FVYENPISL	4	1	1	Q6NTF9		0	2.68752e+07	0.019	0.1128	13.03	19.795	2	1081.56	-0.589492	81.3762	0	C1203	55.56	C1203	3.5	C1203	0.01
Medium	EIAKVTEGV	4	1	1	A0AV96		0	9221005	0.02	0.1263	26.88	0.816773	2	945.525	-0.51347	37.3813	0	C1203	40.74	A6802	3	A6802	0.01
Medium	IQADAKLQF	1	1	1	Q96AC1		0	2.92931e+07	0.02	0.1258	22.44	2.30147	2	1033.57	-0.281441	44.6087	0	C1203	40.74	B1503	3.9	B1503	0.03
Medium	EQADIFERV	2	1	1	O60343		0	3.62881e+07	0.02	0.1228	13.07	21.6775	2	1106.55	-0.61148	55.7514	0	C1203	44.44	A6802	43.4	A6802	0.4
Medium	SKHRAQVIY	1	1	1	P62851		0	2.35609e+06	0.02	0.1257	11.35	25.3191	2	1101.61	-1.55197	21.3131	0	C1203	40.74	B1503	15.9	B1503	0.4
Medium	AKIPGTGAL	2	1	1	O75298		0	7.90398e+06	0.021	0.1318	25.53	0.533626	2	827.498	-0.514552	41.6559	0	C1203	48.15	B1503	30.7	B1503	0.8
Medium	GKIRKDLKY	1	1	1	Q2TAY7		0	6.19798e+06	0.021	0.1342	21.88	0.376532	2	1120.68	-0.642736	21.5707	0	C1203	40.74	B1503	132.1	B1503	2.5
Medium	FASEVSNVL	2	1	1	Q92783		0	1.46202e+07	0.021	0.1317	21.59	3.44147	2	965.494	0.0650269	65.5778	0	C1203	88.89	C1203	7	C1203	0.01
Medium	AAFLGALASL	1	1	1	P46531		0	8.73626e+06	0.021	0.1317	16.77	6.14514	2	933.54	-0.521359	52.8842	0	C1203	77.14	B1503	364.7	C1203	1.9
Medium	FAFPDEFVF	1	2	2	O14908;Q8TF65		0	4.83191e+06	0.021	0.1337	15.56	8.53789	2	1118.52	-0.150791	104.485	0	C1203	85.19	B1503	8.6	C1203	0.12
Medium	HTVGIIVKT	1	1	1	Q96QT6		0	7.14164e+06	0.021	0.1321	12.67	4.95872	2	967.593	-0.292497	32.3772	0	C1203	40.74	A6802	29.3	A6802	0.3
Medium	LQKPGETVF	1	1	1	Q6NYC1		0	1.20594e+07	0.021	0.136	11.53	36.2785	2	1018.56	-0.370345	45.3442	0	C1203	40.74	B1503	3.4	B1503	0.02
Medium	ESVSIFSSA	3	1	1	Q15800		0	3.67804e+07	0.022	0.1475	30.39	0.227751	2	926.446	-0.406617	64.3812	0	C1203	33.33	A6802	7.5	A6802	0.05
Medium	GKGSFGEVF	5	2	2	Q9P289;Q9Y6E0		0	2.85436e+07	0.022	0.1502	29.33	0.454239	2	927.457	0.0308197	49.8496	0	C1203	37.04	B1503	52	B1503	1.2
Medium	MVAPFISQV	1	1	1	Q8N434		0	7.96406e+06	0.022	0.1426	23.23	2.23717	2	991.528	-0.601946	79.5932	0	C1203	51.85	A6802	2.7	A6802	0.01
Medium	STIGQAFEL	9	2	2	P29353;Q6S5L8		0	1.82537e+07	0.022	0.1386	22.99	2.49313	2	965.494	-0.0614061	75.1103	0	C1203	74.07	A6802	37.5	A6802	0.4
Medium	FQKSGASVV	1	1	1	Q5SSJ5		0	1.06849e+07	0.022	0.152	21.21	2.78931	2	922.499	-0.0511201	29.0532	0	C1203	48.15	B1503	26.5	C1203	0.5
Medium	SQGSFPEHY	3	1	1	Q9HBH0		0	2.13504e+07	0.022	0.1391	19.06	2.17289	2	1051.45	-0.741974	38.175	0	C1203	44.44	B1503	21.3	B1503	0.6
Medium	ETSPHVIQA	4	1	1	O75533		0	5.77407e+08	0.022	0.1386	19.02	3.55015	2	981.499	-1.40348	32.3178	0	C1203	48.15	A6802	13.8	A6802	0.12
Medium	YKKELEKTY	2	1	1	P02545		0	9.36753e+06	0.022	0.1492	17.19	7.57161	3	1201.65	0.0205047	22.8263	0	C1203	51.85	B1503	32.8	B1503	0.8
Medium	GKFHSIVRL	1	1	1	O00567		0	3.72225e+06	0.022	0.1513	15.09	5.83089	2	1056.63	-0.854232	33.8766	0	C1203	48.15	B1503	137.6	B1503	2.5
Medium	EIYSDTQFPS	1	1	1	Q9UKY7		0	1.13258e+07	0.022	0.1538	12.78	12.1131	2	1186.53	-0.204568	62.396	0	C1203	5.71	A6802	406.8	A6802	1.9
Medium	NKTFLTQVm	1	1	1	Q9C000	M9(Oxidation)	0	6.20095e+06	0.023	0.1615	37.56	0.0612894	2	1097.57	0.185327	30.6604	0	C1203	33.33	B1503	152.4	B1503	2.5
Medium	GKMDPVAY	1	1	1	P47897		0	1.23896e+07	0.023	0.1614	29.44	0.540259	2	880.423	-0.59423	37.9712	0	C1203	26.67	B1503	101	B1503	1.9
Medium	DSSEIHFKV	4	1	1	P63165		0	3.45006e+07	0.023	0.1616	15.17	15.3808	2	1061.53	-0.0665592	45.0525	0	C1203	74.07	A6802	12.9	A6802	0.12
Medium	GKRQASRAF	1	1	1	Q9GZM5		0	3.12786e+06	0.024	0.1722	31.64	0.213667	2	1020.57	-0.638766	17.3268	0	C1203	33.33	B1503	15.3	B1503	0.4
Medium	RMSKRmCVL	1	1	1	Q8NG85	M6(Oxidation)	0	3.04921e+07	0.024	0.1693	23.34	1.68903	2	1139.58	-1.74371	59.7602	0	C1203	44.44	B1503	24	B1503	0.6
Medium	DVYDKVDYL	1	1	1	Q14254		0	2.27461e+07	0.024	0.1717	22.62	1.73185	2	1129.54	2.4626	63.9739	0	C1203	48.15	A6802	48.3	A6802	0.5
Medium	ETIRNIPHL	1	1	1	Q9NVX0		0	2.61247e+07	0.024	0.1671	22.25	1.39772	2	1092.62	-0.266375	46.3695	0	C1203	70.37	A6802	35	A6802	0.4
Medium	LKVESPGTY	2	1	1	O00170		0	1.75574e+07	0.024	0.171	18.46	5.72524	2	993.524	-0.775697	35.1848	0	C1203	48.15	B1503	7.8	B1503	0.15
Medium	LVPEFVHNV	1	1	1	Q9HCD6		0	1.35209e+07	0.024	0.1726	17.66	5.5138	2	1053.57	-0.579122	58.4088	0	C1203	44.44	A6802	12	A6802	0.1
Medium	KASSITREL	2	1	1	P30622		0	1.7034e+07	0.025	0.1788	36.28	0.0597476	2	1004.57	-0.1189	26.2424	0	C1203	88.89	C1203	152.8	C1203	0.7
Medium	LNLAISDLF	1	1	1	P51681		0	2.81519e+07	0.025	0.1831	29.35	0.423348	2	1005.56	-0.243053	57.3439	0	C1203	29.63	B1503	86.2	B1503	1.7
Medium	RQIGSRSY	2	1	1	P51114		0	4.94129e+07	0.025	0.1798	24.72	1.14779	2	966.511	-0.313739	21.3724	0	C1203	30	B1503	7.2	B1503	0.12
Medium	FSWPDVREL	1	1	1	A1L390		0	0	0.025	0.1833	21.35	3.09545	2	1148.57	-0.750379	79.3586	0	C1203	88.89	C1203	15.3	C1203	0.05
Medium	RQFMDRTHY	1	1	1	P0C7U1		0	5.57533e+06	0.025	0.1783	20.51	2.56712	3	1253.58	-1.11627	28.4617	0	C1203	40.74	B1503	2.7	B1503	0.01
Medium	ETYRGGMAI	1	1	1	Q13057		0	1.83424e+07	0.025	0.1846	18.81	3.89635	2	997.476	-0.88862	41.4893	0	C1203	62.96	A6802	11.1	A6802	0.09
Medium	EVLDKRYNV	5	1	1	Q13523		0	6.25953e+07	0.025	0.1849	17.43	6.72721	2	1135.61	-0.42821	36.0575	0	C1203	40.74	A6802	24.1	A6802	0.25
Medium	ETAPDSYKV	1	1	1	Q14244		0	1.23342e+08	0.025	0.1785	17.26	8.23705	2	1009.48	-0.192404	35.1519	0	C1203	77.78	A6802	3.8	A6802	0.01
Medium	SKKPTGLFY	1	1	1	Q13459		0	8.023e+06	0.025	0.1827	14.17	11.1345	2	1040.58	-0.44911	35.9932	0	C1203	48.15	B1503	24.3	B1503	0.6
Medium	EVPHFHHEL	2	1	1	Q53EL6		0	2.99596e+07	0.025	0.1808	13.37	15.1609	2	1144.55	-0.371486	32.1431	0	C1203	40.74	A6802	28.3	A6802	0.3
Medium	SKPKEKLVY	3	1	1	Q9BTY2		0	1.17837e+07	0.025	0.1782	13.33	6.81908	2	1091.65	-0.707281	22.5198	0	C1203	44.44	B1503	290.1	B1503	3.5
Medium	KKSDVEAIF	3	2	2	O60812;P07910		0	3.86856e+07	0.026	0.1878	28.68	0.457715	2	1036.57	-1.37544	40.6139	0	C1203	37.04	B1503	17.4	B1503	0.5
Medium	SSHFVPVFV	1	1	1	P32942		0	2.39649e+07	0.026	0.1926	28.23	0.639286	2	1018.54	-0.288989	65.3753	0	C1203	74.07	A6802	23.8	A6802	0.25
Medium	QQFLIQQQY	1	1	1	Q6Y7W6		0	6.46993e+06	0.026	0.1893	24.13	1.50239	2	1195.61	-0.287894	66.5869	0	C1203	40.74	B1503	9.2	B1503	0.17
Medium	KASEKIFYV	2	1	1	Q16385		0	1.12116e+07	0.026	0.191	20.43	2.52564	2	1084.6	-0.970465	41.4572	0	C1203	85.19	C1203	77.2	C1203	0.4
Medium	TLAEIYVAA	1	1	1	P36956		0	1.06089e+07	0.027	0.1946	26.83	0.65007	2	950.519	-0.0921886	69.7117	0	C1203	11.11	A6802	48.4	A6802	0.5
Medium	KKFAQSTNL	1	1	1	P25490		0	7.0956e+06	0.027	0.1937	23.33	1.31597	2	1036.58	-0.423221	24.5809	0	C1203	40.74	B1503	15.9	B1503	0.4
Medium	GKRPGGSTF	2	1	1	O15399		0	1.88877e+07	0.028	0.204	34.7	0.129913	2	906.479	-0.276708	19.7867	0	C1203	40.74	B1503	10.1	B1503	0.2
Medium	TVADHIQKV	2	1	1	Q9Y678		0	8.31559e+06	0.028	0.2033	22.66	1.39159	2	1010.56	-0.409377	28.2227	0	C1203	48.15	A6802	15.5	A6802	0.15
Medium	KKSRFGNAF	1	1	1	Q6P2Q9		0	5063012	0.028	0.2009	22.48	1.37506	2	1054.58	-0.366288	23.7306	0	C1203	33.33	B1503	5.7	B1503	0.07
Medium	AKYKNQVVY	1	1	1	Q9NVR2		0	6.40509e+06	0.028	0.2019	20.46	2.69175	2	1112.61	-0.640694	26.8937	0	C1203	51.85	B1503	5	B1503	0.05
Medium	DTFPTAMHI	2	1	1	P07954		0	2.01193e+07	0.028	0.1993	20.12	3.7655	2	1032.48	-0.434283	65.1363	0	C1203	70.37	A6802	17.5	A6802	0.17
Medium	EVPPPFTLV	5	1	1	Q8NI35		0	101666322	0.028	0.1988	20.01	2.67633	2	998.556	0.0114129	87.1781	0	C1203	44.44	A6802	6.1	A6802	0.03
Medium	KKLSSAVVF	2	1	1	O60934		0	1.58127e+07	0.028	0.2014	19.34	0.83235	2	978.597	-1.28637	36.3613	0	C1203	40.74	B1503	3.9	B1503	0.03
Medium	KAFAQLFIL	1	1	1	Q14246		0	1.00713e+08	0.028	0.1998	18.29	1.35057	2	1050.63	-0.106809	49.3659	0	C1203	77.78	B1503	61.8	C1203	0.5
Medium	EAFKPFLGI	2	1	1	Q14974		0	4.88338e+06	0.028	0.2002	17.36	6.52981	2	1021.57	-0.525376	76.2747	0	C1203	74.07	A6802	14.8	A6802	0.15
Medium	RKGEFVNEY	2	1	1	O96028		0	8.26418e+06	0.028	0.2039	15.9	9.03237	2	1141.56	-0.46721	29.3513	0	C1203	48.15	B1503	19.7	B1503	0.5
Medium	AQEKMVYIY	1	1	1	Q8IUF8		0	1.2447e+07	0.028	0.2025	14.79	12.8908	2	1144.57	-0.119749	65.1629	0	C1203	44.44	B1503	14.6	B1503	0.4
Medium	HTAEITHEI	1	1	1	Q00597		0	1.52632e+07	0.028	0.2032	12.72	22.4677	2	1050.52	-0.300363	29.0473	0	C1203	70.37	A6802	2.5	A6802	0.01
Medium	STAGLPTAGL	2	1	1	Q765P7		0	1.10971e+08	0.029	0.2058	36.36	0.12025	2	887.483	-0.203316	62.0016	0	C1203	48.57	A6802	14.8	A6802	0.15
Medium	LTVPFARYL	1	2	2	P12081;P49590		0	9.79437e+06	0.029	0.2059	19.04	2.23718	2	1079.62	-0.364991	80.5418	0	C1203	77.78	C1203	30.7	C1203	0.15
Medium	ETYNGHLVSC	2	1	1	Q9Y4Z0		0	4.44228e+08	0.029	0.2081	15.82	5.16829	2	1122.49	-0.444247	42.7862	0	C1203	28.57	A6802	92.5	A6802	0.8
Medium	RKGAGSVF	1	1	1	P62917		0	3.79904e+07	0.03	0.2114	33.26	0.115703	2	821.463	-0.129259	22.0105	0	C1203	36.67	B1503	126.3	B1503	2.5
Medium	SKFGTGNKY	2	1	1	P14735		0	6.98301e+06	0.03	0.2115	22.3	2.46755	2	1001.5	-0.109689	22.5544	0	C1203	44.44	B1503	15.2	B1503	0.4
Medium	LMISRNHCV	1	1	1	O76064		0	2.12662e+06	0.03	0.2127	19.53	3.99753	2	1072.54	-0.883664	105.704	0	C1203	40.74	B1503	481.9	C1203	2.5
Medium	VTYSKPRLA	2	1	1	O75964		0	1.61463e+07	0.03	0.2121	18.79	2.88042	2	1034.6	-0.756776	29.8951	0	C1203	48.15	C1203	325.3	C1203	1.2
Medium	AEIQmVILL	1	1	1	P35408	M5(Oxidation)	0	7.68256e+06	0.03	0.2128	15.35	7.69617	2	1045.6	-0.483529	73.9905	0	C1203	48.15	B1503	257.1	B1503	3.5
Medium	RKKAAIQTF	1	1	1	Q96DI7		0	3.58541e+06	0.03	0.2131	14.33	2.91308	2	1062.64	-0.802237	22.0564	0	C1203	37.04	B1503	7.6	B1503	0.12
Medium	RKKDWKTLY	1	1	1	Q9NWZ5		0	2.79945e+07	0.03	0.2133	10.99	13.0729	3	1237.7	-0.573137	27.0697	0	C1203	40.74	B1503	45.2	B1503	1.1
Medium	KQADPFASL	2	1	1	Q5SR56		0	1.4182e+07	0.031	0.2145	29.64	0.648107	2	976.51	-0.0594733	54.1413	0	C1203	44.44	B1503	5.9	B1503	0.08
Medium	RKYPENDLF	1	1	1	P29375		0	1.02704e+07	0.031	0.2159	10.61	33.0813	2	1181.6	0.539401	41.5998	0	C1203	40.74	B1503	15.2	B1503	0.4
Medium	ESASFTVTV	1	1	1	O75147		0	1.90555e+07	0.032	0.2178	28.22	0.371002	2	940.462	-0.297342	64.8561	0	C1203	81.48	A6802	2.6	A6802	0.01
Medium	RQHFSPLSL	1	1	1	O75179		0	9.94493e+06	0.032	0.2166	15.48	7.76226	2	1084.59	-0.291504	47.9889	0	C1203	44.44	B1503	4.5	B1503	0.04
Medium	AAFREPRLL	2	1	1	P08865		0	2.21793e+07	0.032	0.2162	15.24	6.99591	2	1072.63	-0.325565	47.3303	0	C1203	88.89	C1203	181.4	C1203	0.8
Medium	RALVPYAGVL	2	1	1	Q9UPQ8		0	1.69629e+07	0.032	0.2164	15.19	5.68757	2	1058.64	0.16111	78.3656	0	C1203	68.57	B1503	303.1	C1203	3.5
Medium	AVYEHPSIL	1	1	1	P43251		0	4.09949e+06	0.033	0.2197	30.09	0.383079	2	1028.54	-0.797731	51.2282	0	C1203	51.85	C1203	33	C1203	0.15
Medium	AAYTEIRAL	1	1	1	Q13535		0	2.29345e+07	0.033	0.2194	27.67	0.618	2	1007.55	0.109495	50.918	0	C1203	88.89	C1203	47.4	C1203	0.25
Medium	KKEGGTVVY	2	1	1	P49419		0	5.45396e+06	0.033	0.22	20.77	2.20815	2	980.541	-0.286762	21.681	0	C1203	48.15	B1503	26.8	B1503	0.7
Medium	SQFHGLITHY	1	1	1	Q92845		0	9.47368e+06	0.033	0.2204	19.75	4.41868	3	1202.6	0.768553	45.4026	0	C1203	42.86	B1503	5.2	B1503	0.06
Medium	VKFPSIMVY	1	1	1	Q68CR1		0	4.44846e+06	0.033	0.2205	16	6.99686	2	1083.59	0.098387	74.387	0	C1203	59.26	B1503	3.1	B1503	0.01
Medium	KTKEGVmYV	4	1	1	O76070	M7(Oxidation)	0	5.10519e+06	0.033	0.2197	15.26	10.124	2	1070.55	-0.118687	21.4648	0	C1203	74.07	C1203	138.5	C1203	0.6
Medium	KQIDRQLTAY	1	1	1	Q14204		0	1.48283e+07	0.033	0.2183	14.63	11.3343	3	1235.67	-0.35529	33.5758	0	C1203	34.29	B1503	5	B1503	0.05
Medium	ITTDVLYTI	1	1	1	P14866		0	2.57587e+07	0.034	0.2237	25.34	0.802972	2	1038.57	-0.428125	80.5477	0	C1203	66.67	A6802	23.2	A6802	0.25
Medium	SVIDIINGEA	1	1	1	Q7L5N1		0	2.09105e+07	0.034	0.2221	24.8	1.43429	2	1030.54	-0.137661	77.0979	0	C1203	5.71	A6802	32.6	A6802	0.3
Medium	EVFPEFAAA	2	1	1	O15294		0	1.11509e+07	0.034	0.2211	22.16	2.64295	2	980.472	-0.406782	76.5213	0	C1203	11.11	A6802	7.5	A6802	0.05
Medium	TQTISQGAI	1	1	1	P31327		0	6.04356e+06	0.034	0.2243	21.49	3.23851	2	918.489	-0.331164	55.8776	0	C1203	29.63	B1503	208.1	B1503	3
Medium	GQVQKIVLY	2	1	1	Q00610		0	1.99815e+07	0.034	0.2223	20.54	1.36083	2	1047.62	-1.34359	50.794	0	C1203	44.44	B1503	10.4	B1503	0.25
Medium	VAPSKAREY	1	1	1	Q5XKP0		0	1.77544e+06	0.034	0.2236	16.75	8.74879	2	1020.55	-0.560294	19.9173	0	C1203	88.89	C1203	472.3	C1203	1.6
Medium	LEFNTVVKL	1	1	1	P29536		0	8.02714e+06	0.034	0.2209	12.95	9.75704	2	1062.62	0.0104124	69.0403	0	C1203	48.15	B1503	71.5	B1503	1.5
Medium	KKDGSSNHVY	1	1	1	Q15910		0	1.29522e+06	0.034	0.2212	11.85	24.4238	2	1134.55	-0.180542	16.5335	0	C1203	37.14	B1503	166.1	B1503	3
Medium	RAFDQGADAIY	1	1	1	Q9UDW1		0	1.9155e+07	0.034	0.2225	10.92	23.9209	2	1226.58	-0.0633033	50.8465	0		0	B1503	65.2	B1503	1.4
Medium	KIADRFLLY	1	1	1	P61968		0	3.62673e+07	0.035	0.2304	25.26	0.47835	2	1138.66	-0.355398	66.8214	0	C1203	48.15	B1503	33.5	C1203	0.7
Medium	KKIEDNNTL	4	1	1	P62750		0	1.40864e+08	0.035	0.2293	19.1	5.2877	2	1074.58	-0.3261	22.6802	0	C1203	44.44	B1503	104.6	B1503	1.9
Medium	RKFLETVEL	2	1	1	P62906		0	1.84095e+07	0.035	0.229	18.53	2.96485	2	1134.65	0.0985038	53.0056	0	C1203	48.15	B1503	25.1	B1503	0.7
Medium	KKSGGHYTY	1	1	1	Q9UPY5		0	9.35587e+06	0.035	0.2272	16.33	8.2007	2	1040.52	-0.0620467	17.4057	0	C1203	48.15	B1503	12.6	B1503	0.3
Medium	ESINHVVVF	1	1	1	Q53FT3		0	2.72464e+07	0.035	0.2269	14.85	14.1624	2	1043.55	-0.830089	58.6523	0	C1203	70.37	B1503	48.9	C1203	0.8
Medium	AKRKTVTAm	1	2	2	Q99525;P62805	M9(Oxidation)	0	766473	0.035	0.2304	14.54	7.14722	2	1021.58	-0.252012	15.7749	0	C1203	37.04	B1503	16.4	B1503	0.4
Medium	TKKVTSVVF	1	1	1	Q9UMS4		0	1.19958e+07	0.036	0.2394	28.41	0.146735	2	1008.61	0.0217947	32.9204	0	C1203	37.04	B1503	16.4	B1503	0.4
Medium	ESSYIFVSV	1	1	1	P42336		0	1.88426e+07	0.036	0.238	27.91	0.552008	2	1030.51	-0.0975228	81.313	0	C1203	74.07	A6802	2.7	A6802	0.01
Medium	FSSPHLLEA	1	1	1	Q96H22		0	6.89321e+06	0.036	0.2365	20.6	3.55614	2	1000.51	-0.292068	53.7559	0	C1203	51.85	C1203	21.5	C1203	0.08
Medium	RKKTLPESSF	1	1	1	Q70EL4		0	4.5636e+06	0.036	0.2345	19.87	2.67179	2	1192.67	-0.508961	25.7099	0	C1203	31.43	B1503	87.7	B1503	1.7
Medium	RHREHLINY	1	1	1	Q5BJD5		0	5.34188e+07	0.036	0.2378	17.07	8.52491	3	1237.66	0.213066	25.1118	0	C1203	44.44	B1503	11.7	B1503	0.25
Medium	ETYPDAVKI	1	1	1	Q8WV22		0	3.39701e+07	0.036	0.2378	16.08	10.2538	2	1035.53	-0.754771	50.9091	0	C1203	74.07	A6802	20.9	A6802	0.2
Medium	SIFITNVTY	1	1	1	Q07699		0	3.0599e+07	0.036	0.2357	15.64	9.22667	2	1057.56	-0.593414	52.8077	0	C1203	48.15	B1503	37.1	B1503	0.9
Medium	EVYTPKEIFV	1	1	1	O95297		0	8.34442e+06	0.036	0.2384	12	17.8088	2	1224.65	0.148137	65.1242	0	C1203	31.43	A6802	14.8	A6802	0.15
Medium	EATDVKSTL	1	1	1	Q9NZM1		0	1.21478e+07	0.036	0.2318	11.2	25.0444	2	963.499	-0.617997	32.604	0	C1203	81.48	A6802	257.7	A6802	1.5
Medium	AKLPTGTTL	2	1	1	P54098		0	1.3852e+07	0.037	0.2479	30.75	0.240176	2	901.535	-0.772868	42.6281	0	C1203	51.85	B1503	32.9	B1503	0.8
Medium	SKLGPGEKY	1	2	2	P53805;Q9UKA8		0	2.24134e+07	0.037	0.2472	26.03	1.00832	2	978.524	-1.13505	24.0336	0	C1203	40.74	B1503	143.7	B1503	2.5
Medium	KAASQILIL	1	1	1	O15439		0	2.56875e+07	0.037	0.2476	25.12	0.354213	2	956.613	-0.640229	57.9169	0	C1203	88.89	C1203	105.3	C1203	0.5
Medium	GKTDPGTVF	1	1	1	Q9NYK5		0	8.29425e+06	0.037	0.241	21.05	4.3875	2	921.466	-1.36095	37.9909	0	C1203	37.04	B1503	25.1	B1503	0.7
Medium	RAFNRIYVA	1	1	1	Q9UHX1		0	8.06739e+07	0.037	0.2401	16.96	4.45738	2	1109.62	-1.18645	37.5976	0	C1203	48.15	C1203	44.4	C1203	0.2
Medium	ESFDSKFYV	2	1	1	Q5VV42		0	1.78539e+07	0.037	0.2434	11.56	21.2996	2	1121.52	0.0543436	61.0975	0	C1203	74.07	A6802	3.1	A6802	0.01
Medium	QVGPVNENV	1	1	1	Q14966		0	1.71795e+07	0.037	0.24	11.17	26.5777	2	955.484	-0.212292	45.3958	0	C1203	44.44	A6802	110.3	A6802	0.8
Medium	MVPRLTAVL	1	1	1	Q63HM2		0	1.75923e+09	0.038	0.2534	30.28	0.060004	2	999.6	-1.80573	58.0127	0	C1203	40.74	C1203	46.8	C1203	0.25
Medium	GQKENVVVY	2	1	1	Q2NKX8		0	7.80097e+06	0.038	0.2498	15.76	11.7652	2	1035.55	-0.87219	35.4968	0	C1203	51.85	B1503	6.6	B1503	0.1
Medium	LSAVHPDKM	1	1	1	Q8TCB7		0	6.81013e+07	0.038	0.2558	14.12	12.158	2	997.513	-0.167418	44.5479	0	C1203	66.67	C1203	367.3	C1203	1.4
Medium	RKRESERTF	1	1	1	Q8TF01		0	4.62579e+06	0.038	0.2566	13.63	14.0956	2	1208.65	-0.63878	17.1519	0	C1203	40.74	B1503	17.6	B1503	0.5
Medium	EALNVIVRL	1	1	1	Q5UIP0		0	3.51006e+06	0.039	0.2678	27.82	0.209138	2	1026.63	-0.355218	68.381	0	C1203	81.48	A6802	286.5	A6802	1.5
Medium	SARAGETRF	1	1	1	P13639		0	3.17907e+06	0.039	0.2625	23.52	1.83833	2	994.506	-0.985954	21.2212	0	C1203	66.67	B1503	86.8	B1503	1.7
Medium	AAISEVLYV	1	1	1	Q4G0J3		0	9.39681e+06	0.039	0.2698	22.46	1.50201	2	964.535	0.136349	78.4515	0	C1203	88.89	C1203	45.9	C1203	0.25
Medium	KGRTPGSSY	1	1	1	Q96BH1		0	2.87061e+06	0.039	0.2676	13.69	16.3735	2	952.485	-0.164445	18.0122	0	C1203	37.04	B1503	69.8	B1503	1.5
Medium	ASFDRAIEM	1	1	1	P52272		0	6.85101e+06	0.04	0.2769	10.78	27.8506	2	1039.49	-0.285663	52.406	0	C1203	77.78	C1203	11.2	C1203	0.03
Medium	HAANIVTAI	1	1	1	P04035		0	3.07665e+07	0.041	0.2901	34.74	0.0923446	2	909.515	-0.37506	44.5453	0	C1203	74.07	C1203	9.7	C1203	0.02
Medium	EVYPGQQYL	1	1	1	Q8NF64		0	3.72998e+07	0.041	0.2898	28.04	0.67557	2	1096.53	0.18625	68.527	0	C1203	48.15	A6802	21.3	A6802	0.2
Medium	SQRAGLQF	2	2	2	Q71UI9;P0C0S5		0	1.087e+07	0.041	0.2856	21.06	2.72516	2	906.479	-0.804334	37.8177	0	C1203	26.67	B1503	25.5	B1503	0.7
Medium	FANGHVNSV	1	1	1	Q9NRL2		0	4.79437e+06	0.041	0.2916	20.02	3.06336	2	944.458	-0.720021	29.504	0	C1203	85.19	C1203	5	C1203	0.01
Medium	VVKPPGSSL	1	1	1	Q92560		0	27566305	0.041	0.2869	19.81	1.67051	2	883.524	-0.58034	35.2328	0	C1203	48.15	C1203	243.9	C1203	1
Medium	SASPIFTHV	1	1	1	Q9HCG8		0	1.55352e+07	0.042	0.2966	23.17	2.28516	2	958.499	-0.420834	48.9793	0	C1203	85.19	A6802	14	A6802	0.12
Medium	QAYPTTVVF	1	1	1	Q8IXB1		0	3.37677e+07	0.042	0.3013	15.84	10.7517	2	1025.53	-0.408126	72.2783	0	C1203	85.19	B1503	4.9	B1503	0.05
Medium	ETSPHTFQL	1	1	1	Q69YN4		0	8.98196e+07	0.042	0.296	13.07	18.8047	2	1059.51	-0.955364	48.0777	0	C1203	77.78	A6802	9	A6802	0.06
Medium	LFQQLAPLY	1	1	1	Q3ZCQ8		0	3.34793e+07	0.043	0.3072	28.75	0.462532	2	1092.61	-0.250038	62.6779	0	C1203	37.04	B1503	210.8	B1503	3
Medium	AVASLEQLY	1	1	1	Q8IYF3		0	1.75574e+07	0.043	0.3121	18.62	5.51815	2	993.525	-0.591398	35.2547	0	C1203	48.15	B1503	206.1	C1203	2.5
Medium	NAFHHPSAV	1	1	1	P32314		0	1.01632e+07	0.043	0.305	14.33	18.1352	2	979.474	-0.495892	25.3676	0	C1203	81.48	C1203	16.1	C1203	0.06
Medium	ETFKNSFVEA	1	1	1	Q6NUM9		0	6.93994e+07	0.043	0.3139	14	15.4505	2	1171.56	-0.725452	49.6768	0	C1203	25.71	A6802	14.4	A6802	0.12
Medium	AATEKVQLL	1	1	1	Q6ZRV2		0	1.0931e+07	0.043	0.306	12.95	15.3922	2	972.572	-0.225291	44.5114	0	C1203	85.19	C1203	271.9	C1203	1.1
Medium	AAAAAAAPGAY	1	1	1	O00716		0	0	0.043	0.311	11.29	36.4488	2	904.451	-1.32994	40.9297	0		0	B1503	300.9	B1503	4
Medium	KKFGGPGARARY	1	1	1	P62249		0	1.43218e+07	0.044	0.3204	18.39	3.59151	3	1307.73	-0.204559	20.9406	0		0	B1503	103.5	B1503	1.9
Medium	KKDMSPQKF	1	1	1	Q96SW2		0	2.4351e+06	0.044	0.3238	17.58	5.34222	2	1108.58	-0.0401608	18.4089	0	C1203	33.33	B1503	270.9	B1503	3.5
Medium	AKHLTPVTL	1	3	3	P30838;P51648;P43353		0	2.14004e+06	0.044	0.3149	17.44	1.76786	2	979.593	-0.413527	34.1827	0	C1203	51.85	B1503	81.9	B1503	1.6
Medium	GQVKKETRY	1	1	1	Q9BTV4		0	1.38885e+06	0.045	0.3277	35.99	0.0718671	2	1108.61	-0.736309	16.9027	0	C1203	37.04	B1503	39.9	B1503	1
Medium	RMFSDPSSF	1	1	1	Q96K58		0	6.4966e+06	0.045	0.3299	16.76	4.02853	2	1073.47	-0.244015	54.4595	0	C1203	40.74	B1503	1.8	B1503	0.01
Medium	ALGRFSQLY	1	1	1	P48449		0	1.51889e+07	0.045	0.3341	15.82	8.05091	2	1054.57	-0.695033	52.4647	0	C1203	40.74	B1503	54.9	B1503	1.2
Medium	EVFRVVDTL	1	2	2	Q07157;Q9UDY2		0	8.24014e+06	0.045	0.3357	13.59	15.5408	2	1077.59	-0.246634	64.906	0	C1203	48.15	A6802	30.8	A6802	0.3
Medium	STIGVDFKI	1	3	3	P62820;Q9H0U4;Q92928		0	4.49175e+06	0.045	0.3344	12.92	12.8469	2	979.545	-0.473225	66.1627	0	C1203	62.96	A6802	16.6	A6802	0.15
Medium	AKYLPHSAGRY	1	1	1	P46782		0	5.26494e+06	0.046	0.3384	16.83	9.28316	3	1262.66	0.0763366	25.5311	0		0	B1503	115	B1503	2
Medium	KTKEGVLYV	1	2	2	P37840;Q16143		0	3.32679e+07	0.046	0.3448	15.83	3.68184	2	1036.6	-0.662122	32.1235	0	C1203	77.78	C1203	217.2	C1203	0.9
Medium	ASAIPTAIDF	1	1	1	P43359		0	2.22327e+07	0.046	0.3397	15.64	14.016	2	1005.52	-0.482831	51.887	0	C1203	62.86	B1503	169.1	B1503	3
Medium	STASILASV	1	1	1	O60716		0	1.70556e+07	0.047	0.3564	46.56	0.00487527	2	848.472	-0.302624	65.8311	0	C1203	74.07	A6802	2.4	A6802	0.01
Medium	RKKKIEEAM	1	1	1	Q13435		0	3.13927e+06	0.047	0.359	26.17	0.498189	2	1132.65	-0.393013	18.019	0	C1203	29.63	B1503	200.9	B1503	3
Medium	AAAVPRAAF	1	1	1	P30040		0	2.96958e+06	0.047	0.3527	20.15	3.60337	2	873.494	-0.120375	41.23	0	C1203	74.07	B1503	20.3	B1503	0.5
Medium	RKLPCSHEY	1	1	1	Q9NVW2		0	7.63007e+06	0.047	0.3524	12.39	20.1753	2	1132.56	-0.44085	23.3745	0	C1203	48.15	B1503	16.3	B1503	0.4
Medium	KKLEKETTMY	1	1	1	P40222		0	8.59597e+06	0.047	0.3534	10.16	34.8906	3	1270.67	-0.307539	23.3027	0	C1203	28.57	B1503	104.1	B1503	1.9
Medium	SLISTILEV	1	1	1	Q9Y263		0	6.90221e+07	0.048	0.3648	28.93	0.228242	2	974.577	-0.0528175	77.6576	0	C1203	51.85	C1203	236.4	C1203	1
Medium	VAAMQPRML	1	1	1	Q13200		0	6.08844e+06	0.048	0.3642	20.99	3.79489	2	1016.54	-0.509686	47.5913	0	C1203	88.89	C1203	222.1	C1203	0.9
Medium	HATRIIDEV	1	1	1	O95816		0	1.51054e+06	0.048	0.37	19.52	3.56614	2	1053.57	-0.587021	33.831	0	C1203	81.48	A6802	48.6	A6802	0.5
Medium	AQPPVGAAY	1	1	1	Q96SN8		0	9.03844e+06	0.048	0.3649	18.19	8.453	2	873.446	-0.152961	43.5925	0	C1203	48.15	B1503	7.2	B1503	0.12
Medium	RQKFSEQVF	1	1	1	O75955		0	1.52536e+07	0.048	0.3669	17.43	5.78748	2	1168.61	-0.393688	38.0401	0	C1203	33.33	B1503	3.6	B1503	0.03
Medium	STSAVNHNV	1	1	1	Q07157		0	9.08061e+06	0.048	0.3655	15.97	8.28977	2	928.448	-0.15465	20.602	0	C1203	70.37	A6802	5.3	A6802	0.02
Medium	HQIKSLQY	1	1	1	Q9NW82		0	4.38986e+07	0.048	0.36	10.71	35.9883	2	1016.55	0.10378	28.3881	0	C1203	26.67	B1503	25.5	B1503	0.7
Medium	RGFGFVTY	1	3	3	Q32P51;P09651;P51991		0	1.42627e+07	0.049	0.378	20.74	2.55151	2	946.478	-0.284701	61.6189	0	C1203	33.33	B1503	71.3	B1503	1.5

## Sheet: Statistics
Total_Peptides	Tool	A*68:02	B*15:03	C*12:03
1685	Total Syfpeithi allelecoverage with threshold	0	0	548
	Total Syfpeithi allelecoverage with threshold %	0.0000	0.0000	0.3252
	Total NetMHC allelecoverage with threshold	545	896	609
	Total NetMHC allelecoverage with threshold %	0.3234	0.5318	0.3614
	Total NetMHC allelecoverage with 50nM threshold	382	601	271
	Total NetMHC allelecoverage with 50nM threshold %	0.2267	0.3567	0.1608
	Best Syfpeithi	0	0	1616
	Best Syfpeithi %	0.0000	0.0000	0.9591
	Best NetMHC	497	869	319
	Best NetMHC %	0.2950	0.5157	0.1893
	Best Syfpeithi with threshold	0	0	548
	Best Syfpeithi with threshold %	0.0000	0.0000	0.3252
	Best NetMHC with threshold	446	746	267
	Best NetMHC with threshold %	0.2647	0.4427	0.1585
	Best NetMHC with 50nM threshold	349	560	173
	Best NetMHC with 50nM threshold %	0.2071	0.3323	0.1027
