# Supplementary material for: TAPBPR mediates peptide dissociation from MHC class I using a leucine lever
Source: eLife. 2018 Nov 28;7:e40126. doi: 10.7554/eLife.40126 (PMC6307860; doi:10.7554/eLife.40126)
Supplement: Figure 5—source data 8. [file elife-40126-fig5-data8.xlsx]

## Sheet: Sheet1
Dataset 1
Volcano plot analysis between WT (condition 1) versus φloop (condition 2)
Sequence	fc(cond1/cond2)	log2 fc(cond1/cond2)	p_value	corrected p_value
AAFHEEFVV	0.00387671	-8.01095	1.53528e-05	7.89424e-05
NAYDFIMKL	0.00733617	-7.09076	9.50334e-06	5.46138e-05
TKFGGIVVL	0.00760838	-7.03819	1.57945e-06	1.46654e-05
YKSSLKDF	0.00867015	-6.84973	4.05646e-06	2.79597e-05
GKYFGGVLEY	0.0096259	-6.69886	1.81588e-06	1.62561e-05
RLWEQLVHF	0.0139253	-6.16615	8.86746e-06	5.13536e-05
QAADNmQAIY	0.0152712	-6.03305	0.000502227	0.00133551
MEEmQNVELV	0.0164691	-5.92409	2.8709e-06	2.16988e-05
KQIFETIYY	0.0168855	-5.88807	8.6858e-07	9.76857e-06
KKFFGEFTGF	0.0182599	-5.77518	0.000126744	0.000428262
RAFEYEIRF	0.0187935	-5.73362	1.69667e-05	8.62535e-05
DTFYIFNHV	0.0203327	-5.62006	5.77754e-07	7.21229e-06
IQQKWRDYYRRR	0.0214189	-5.54497	1.98014e-06	1.7113e-05
DVAQIIIRI	0.0236596	-5.40143	2.33911e-11	2.03426e-08
FAIDPHLLLSV	0.0247665	-5.33546	1.16973e-06	1.17864e-05
RIMKAQALR	0.026063	-5.26185	1.89149e-05	9.40307e-05
RQYGSEGRFTF	0.0268831	-5.21716	1.12885e-06	1.15823e-05
EAAFFEGHFL	0.0272362	-5.19833	6.1567e-07	7.60115e-06
SNSDVIIYV	0.0282281	-5.14672	0.000101382	0.000357622
RKLDPPGGQFY	0.0296592	-5.07538	0.000361827	0.00103045
GKYLELLGY	0.0303466	-5.04232	4.688e-07	6.2095e-06
ESADKFYGV	0.0322099	-4.95635	6.96318e-05	0.000269763
HVFDHPWETV	0.0329932	-4.92169	1.29949e-05	6.96887e-05
YTFGRIVIY	0.0341182	-4.87332	1.96119e-06	1.7113e-05
WQKGIGEFF	0.0349254	-4.83958	4.88713e-06	3.13754e-05
EVIEKFDYV	0.036	-4.79586	1.14776e-05	6.32279e-05
DTAHVLFTL	0.0370275	-4.75526	3.74298e-07	5.49705e-06
RAFVHWYV	0.0372574	-4.74633	1.14408e-05	6.32279e-05
EEVIVAGLSLY	0.0378214	-4.72465	1.19523e-07	2.74049e-06
ESIRFFVNV	0.0379615	-4.71932	1.34933e-06	1.30126e-05
GKITDFIKF	0.0383952	-4.70293	5.17282e-06	3.26498e-05
SIYGSYRNF	0.0384845	-4.69958	4.35977e-06	2.9178e-05
FSFPGELLM	0.0387425	-4.68994	0.00023657	0.000722246
RKLFIGGLSF	0.0394709	-4.66307	3.95302e-05	0.000171396
IATEIILEI	0.0395706	-4.65943	0.000681397	0.00172517
FAYDGKDYI	0.0403058	-4.63287	3.13345e-05	0.000140256
FAYDGKDYL	0.0403058	-4.63287	3.13345e-05	0.000140256
LmNNHMKLI	0.0409762	-4.60907	5.1442e-06	3.25606e-05
KAIDVVVmV	0.0420546	-4.57159	0.000202098	0.000629839
YKVEYPImY	0.0440693	-4.50408	1.35157e-05	7.16267e-05
KAFPKAYLL	0.0448523	-4.47867	4.92125e-05	0.000204779
RLFKDQLVY	0.0460735	-4.43992	4.69196e-05	0.000197802
GKYGSSLEF	0.0461141	-4.43865	9.30738e-05	0.000333551
YAFLHRTL	0.0475051	-4.39577	0.000315914	0.000925501
STVSIQIKL	0.0476835	-4.39037	1.14806e-05	6.32279e-05
KAYFDVKEY	0.0484512	-4.36732	0.000196563	0.000617729
EVFDKTYQFL	0.0493133	-4.34188	3.97817e-08	1.5412e-06
GKAWGILTF	0.0499301	-4.32395	2.23024e-06	1.84173e-05
RQFEFSVDSF	0.0503225	-4.31265	8.37182e-07	9.59769e-06
PENFRLLGNVL	0.0504428	-4.30921	2.90714e-06	2.17672e-05
EVFEDAAEIRL	0.0504632	-4.30862	3.79625e-07	5.49942e-06
AAIGLVIYY	0.0505535	-4.30604	0.00241902	0.00513379
HTFFIKDSL	0.0509602	-4.29449	0.000102767	0.000361941
AHLNPAVTF	0.0527361	-4.24507	9.28276e-05	0.000333201
DTFYVQVLV	0.0529213	-4.24001	3.14082e-06	2.2862e-05
SQSGLVHIW	0.0538729	-4.2143	7.335e-07	8.61349e-06
EEAELLVKL	0.0543497	-4.20158	0.00119737	0.00277371
EISSILKEL	0.0556465	-4.16757	2.44987e-05	0.000115648
RKYGNANVW	0.0566769	-4.1411	0.0023694	0.00506089
TAAFWTRLY	0.0569631	-4.13383	1.31766e-06	1.2873e-05
GHYLGEFSITY	0.0572271	-4.12716	4.52219e-06	2.97987e-05
KLVDFVIHF	0.0574594	-4.12131	9.0731e-06	5.24094e-05
STVEVIFHV	0.0574704	-4.12104	4.81766e-07	6.22143e-06
ETIDLLVQI	0.0582872	-4.10068	0.00119895	0.00277449
QQHDFTSQIF	0.0583327	-4.09955	7.27634e-06	4.35998e-05
LTVPFARYL	0.0603752	-4.0499	7.9687e-06	4.67511e-05
YLGEFSITY	0.0605307	-4.04619	0.00034401	0.000994839
GKLISVEY	0.0608719	-4.03808	7.40529e-05	0.000281076
QSAEIWEKL	0.0609558	-4.03609	3.7414e-06	2.61898e-05
DVVNILVYV	0.0623031	-4.00455	2.21727e-05	0.000106914
IDMDSKMKKM	0.0647059	-3.94996	1.23798e-07	2.8063e-06
STYEGKPIFL	0.0654239	-3.93404	3.55591e-06	2.52852e-05
EVFALIHEL	0.0677661	-3.88329	2.68022e-07	4.39596e-06
VALNFIISY	0.0683676	-3.87054	4.20642e-06	2.86419e-05
FASFILRTL	0.069903	-3.8385	2.2498e-08	1.05319e-06
RQALLLLAL	0.0700003	-3.83649	5.47486e-07	6.87263e-06
TAFSRLILI	0.0700764	-3.83493	1.3166e-06	1.2873e-05
EVFPLAMNYL	0.0708539	-3.81901	1.65034e-05	8.42797e-05
EVMKYITSL	0.0712174	-3.81163	2.20583e-05	0.000106591
ETFFGVQWV	0.0720506	-3.79485	4.39316e-08	1.60934e-06
DVARISWYL	0.0725479	-3.78492	1.62816e-06	1.50554e-05
TSGHLLSAVT	0.0726752	-3.78239	5.09666e-05	0.000210518
YSYWTKNGV	0.0737075	-3.76204	5.53187e-06	3.46243e-05
ETFmNRVEV	0.0751395	-3.73428	5.40564e-05	0.000220045
IQWENNGQVF	0.0759929	-3.71799	7.83312e-09	7.10089e-07
GQFQKIVLY	0.0774996	-3.68967	1.03472e-05	5.79802e-05
GKAEVAVTLY	0.0785847	-3.66961	2.48689e-05	0.000116905
HKVETFSGVY	0.0794627	-3.65358	7.12625e-06	4.28147e-05
VEGYLLAGENL	0.0797285	-3.64876	2.18002e-06	1.8201e-05
FSWEGAFQHV	0.0808367	-3.62885	7.06753e-06	4.25757e-05
FKVSDEVGF	0.08131	-3.62042	1.76239e-05	8.89909e-05
RTTDIVIRI	0.0830883	-3.58921	2.75234e-06	2.13259e-05
DAANVMVYV	0.0838701	-3.5757	0.000947308	0.00227415
HTSPLTQIRL	0.0843722	-3.56709	3.45888e-05	0.000153599
GKYGFSDPLTF	0.085063	-3.55532	2.69448e-05	0.000124322
RQIPLAVLF	0.0879076	-3.50787	9.62393e-06	5.48185e-05
ELANLYHHV	0.0885032	-3.49813	0.00072622	0.00182122
NVAEIVIHI	0.0897364	-3.47816	2.5175e-06	1.97791e-05
LAIEHVRFF	0.0916154	-3.44827	1.41456e-05	7.4091e-05
MPAFIFEHI	0.0927795	-3.43005	2.19288e-07	4.03886e-06
EAVGKIFSNV	0.0939501	-3.41196	0.000403804	0.00112018
MKLLTGLVF	0.0948165	-3.39872	5.51365e-08	1.72072e-06
EAELEKLSL	0.0954476	-3.38915	7.38632e-05	0.00028083
ETVELQISL	0.0954476	-3.38915	7.38632e-05	0.00028083
HTILIVEKV	0.0962731	-3.37672	3.3162e-05	0.000147847
FAGLVQEISF	0.096304	-3.37626	3.51489e-06	2.51527e-05
KGRLIIEF	0.0969688	-3.36634	0.00131608	0.00302376
HVAGFDFEVL	0.100706	-3.31178	3.19603e-06	2.31522e-05
ESANLDFmL	0.100775	-3.31078	5.84424e-06	3.61763e-05
RAFPLPMSF	0.101205	-3.30464	6.06271e-05	0.000240687
KIVDWAIQV	0.101478	-3.30076	1.17756e-08	8.11707e-07
NAYDFImKL	0.102801	-3.28208	2.71256e-07	4.41675e-06
MKVLLAAAL	0.105932	-3.23878	2.91627e-06	2.17672e-05
AMASIINRL	0.107341	-3.21972	6.66798e-05	0.000261359
SVFTFVAEV	0.107745	-3.21431	5.38703e-05	0.000219685
YTTDFIFNL	0.108288	-3.20705	4.40142e-07	5.99393e-06
QIAEIIQWV	0.10949	-3.19113	4.30103e-06	2.91097e-05
YKFDFPVSY	0.111814	-3.16083	8.01845e-06	4.69205e-05
IGVDFALKV	0.112514	-3.15183	7.85664e-07	9.09993e-06
RQFPVTVHF	0.113114	-3.14415	6.7617e-05	0.000264236
FSFDYIVKW	0.113395	-3.14057	4.36061e-05	0.000185926
GQVTFLHVF	0.114861	-3.12204	3.80814e-06	2.6434e-05
MVDVLVFASS	0.118385	-3.07844	1.43176e-05	7.44715e-05
TKVGPNATY	0.119141	-3.06926	0.000518482	0.00137224
YAYATVLTF	0.120856	-3.04863	7.89391e-05	0.000295135
MVAPVWYLV	0.122601	-3.02796	2.80469e-06	2.1509e-05
EVQNILSFL	0.123609	-3.01614	8.88785e-07	9.83793e-06
FPAEFYPHI	0.125177	-2.99796	8.27468e-07	9.53498e-06
HTVGFILQL	0.131128	-2.93095	2.71597e-11	2.03426e-08
FEHQLIKL	0.131128	-2.93095	2.71597e-11	2.03426e-08
SGYYRVSSY	0.131877	-2.92273	1.27787e-05	6.90234e-05
GKWPSSQQY	0.132008	-2.9213	8.27571e-05	0.000303875
FAMPYFIQV	0.132619	-2.91464	5.57491e-05	0.000225303
SQFHGLITHY	0.133492	-2.90518	2.89988e-05	0.00013244
FISEIIHQL	0.134511	-2.89421	8.68113e-07	9.76857e-06
GKVDGLAAL	0.135351	-2.88522	2.25903e-05	0.000107771
VSYKGSISY	0.137379	-2.86377	1.7158e-05	8.68335e-05
DVFHMVVEV	0.138459	-2.85247	2.87954e-07	4.58888e-06
GKYGFVIAV	0.138738	-2.84957	8.85716e-05	0.000320484
QSRLIFTY	0.13918	-2.84498	0.000265599	0.0008
IAIPFLIKL	0.141036	-2.82586	0.00155986	0.00354398
ETVDLIKFI	0.143204	-2.80385	1.82813e-06	1.63008e-05
TLAENCIDQV	0.143823	-2.79764	4.82339e-08	1.60934e-06
ESAWVLTNI	0.144088	-2.79498	0.000200018	0.000624224
TAVALLRLL	0.144853	-2.78734	1.547e-07	3.21862e-06
HQITVLHVY	0.145008	-2.7858	0.000493062	0.00131425
HQPVYLLSE	0.145205	-2.78384	1.41051e-08	8.11707e-07
RQLLYITAF	0.146851	-2.76757	2.29195e-10	1.03e-07
RKFPAGKVPAF	0.14938	-2.74295	0.000618818	0.00159021
RALALVVTL	0.150469	-2.73246	7.6543e-05	0.000289059
KSVDWLLVF	0.150767	-2.72961	0.000117661	0.000404875
ITFPGIKLI	0.150958	-2.72778	1.32609e-07	2.89293e-06
WTADISHLL	0.151178	-2.72568	5.0011e-05	0.000207717
NAMDVVVQF	0.153519	-2.70351	1.39353e-05	7.33319e-05
FSVITVIGAL	0.153749	-2.70135	3.40156e-07	5.12974e-06
SSYLFIVKY	0.155423	-2.68573	7.0312e-05	0.00027114
AITDLLLGL	0.156095	-2.67951	8.3282e-05	0.00030478
TLADIIIGI	0.156095	-2.67951	8.3282e-05	0.00030478
LGRSIYEY	0.15751	-2.66648	0.000627986	0.00160717
LQLERINVY	0.159944	-2.64436	1.87808e-06	1.66144e-05
YVSEILEKV	0.162193	-2.62421	0.00135981	0.00311785
DTVQFAEYI	0.16232	-2.62309	0.00012857	0.000432631
SIAQIIVTV	0.162387	-2.62249	3.49051e-05	0.00015409
EISHVLNFL	0.163061	-2.61652	1.56898e-06	1.46286e-05
TLYGCmFSMV	0.163519	-2.61247	1.32339e-05	7.05274e-05
AQISWVTVF	0.165565	-2.59453	1.46776e-05	7.59919e-05
QKLIFTVGY	0.165703	-2.59333	9.43878e-07	1.02956e-05
EVLDILTRL	0.165773	-2.59272	8.88726e-07	9.83793e-06
RQINWTVLY	0.167875	-2.57454	6.84234e-07	8.17806e-06
ALFRTIITY	0.167883	-2.57447	1.15836e-05	6.34837e-05
YIKDFFEQM	0.169292	-2.56241	1.3817e-05	7.30515e-05
NVTWVIVNL	0.172435	-2.53587	7.1251e-07	8.47096e-06
IAVNAVLTV	0.176521	-2.50209	0.000223059	0.000682851
ETSPHTFQL	0.178696	-2.48442	0.00448943	0.00893512
ALIEFIRSEY	0.179054	-2.48154	1.72451e-06	1.56249e-05
MMVFHLTFCGSN	0.180103	-2.47311	8.23368e-05	0.000303875
FAFPLHVDY	0.180633	-2.46887	1.36052e-06	1.30645e-05
FASFIVQYY	0.181696	-2.4604	7.35999e-07	8.61349e-06
SVYEGGVFFL	0.183713	-2.44448	0.000260507	0.000787052
GKFSSDRTITEY	0.184953	-2.43477	2.34179e-06	1.88602e-05
ESFFLGETL	0.185273	-2.43227	8.37291e-05	0.000305917
ESLEHDLQASV	0.187123	-2.41794	0.000204506	0.000634705
NAFASVILF	0.190388	-2.39298	4.31201e-05	0.000184554
FASTILHLV	0.191775	-2.38251	2.6327e-07	4.37434e-06
KSIARVLTV	0.194402	-2.36289	0.000689489	0.00173881
YAFLREAL	0.196968	-2.34397	0.000242199	0.000738428
EERMVEmFL	0.199449	-2.32591	4.88409e-06	3.13754e-05
EVIWLTQHV	0.199954	-2.32226	9.54165e-06	5.46941e-05
YVTSVILHI	0.200022	-2.32177	7.68711e-05	0.000289059
KLFIGGLSF	0.200884	-2.31556	4.78079e-07	6.2095e-06
TTVDHFWGL	0.201247	-2.31296	1.38895e-05	7.32624e-05
KGFAFVEY	0.204418	-2.2904	0.000682543	0.00172517
ESASFTVTV	0.205299	-2.2842	0.0017385	0.00386773
DTFSVQVLV	0.207574	-2.2683	2.07383e-08	9.91469e-07
ISFPAPLYI	0.208414	-2.26247	3.03018e-05	0.000136998
STIDILYQL	0.20969	-2.25367	5.03074e-05	0.000208562
YLADIFTKL	0.210739	-2.24647	2.41297e-07	4.23589e-06
DTTVIIWQV	0.211165	-2.24356	2.11159e-06	1.78374e-05
FAIPLIEKL	0.212121	-2.23704	3.05708e-06	2.24485e-05
YNFEYSVVF	0.21242	-2.23501	1.19016e-05	6.50679e-05
WAYPRQVFI	0.214138	-2.22339	0.000118223	0.000405569
NLLVKSFIKW	0.216578	-2.20704	0.000105591	0.000368993
EIFDKIHSL	0.219705	-2.18636	0.00500663	0.00979103
GKFNVLLTTY	0.22001	-2.18436	0.00100346	0.00238854
EVFDEKIEV	0.221428	-2.17509	3.71405e-06	2.61613e-05
EVFNYIHNI	0.224411	-2.15579	4.08091e-10	1.30997e-07
YAAGFIFTT	0.225032	-2.1518	0.000563664	0.00147103
HQAIHTIEY	0.226147	-2.14467	0.00144295	0.00329169
NSVFVATFL	0.22771	-2.13473	0.00199857	0.00433893
ELSDVLIYL	0.228881	-2.12733	1.19894e-05	6.52305e-05
ETFAFIQQL	0.229099	-2.12596	1.52077e-05	7.83755e-05
FAISILQQL	0.229149	-2.12564	4.90998e-08	1.60934e-06
FAISILQQI	0.229149	-2.12564	4.90998e-08	1.60934e-06
GKLIIWDSY	0.231054	-2.1137	0.000115798	0.000400306
LSFQEVREY	0.231819	-2.10893	0.000128615	0.000432631
DVSIINITV	0.232118	-2.10707	6.90619e-05	0.000268481
mPAFIFEHI	0.234095	-2.09483	2.55472e-06	2.00016e-05
mAEPAAGGDGLV	0.238935	-2.06531	0.000351563	0.00100632
RVFPYSVFY	0.240032	-2.0587	7.72758e-06	4.55745e-05
EVLDFITHL	0.241379	-2.05063	3.04558e-08	1.29121e-06
EVYPFGIVGM	0.241974	-2.04708	4.97685e-06	3.18604e-05
LSFPTTKTY	0.246643	-2.0195	0.0015404	0.00350333
KKEGGTVVY	4.1418	2.05026	6.8029e-06	4.12025e-05
EIAGPGFINV	4.14368	2.05091	0.00409875	0.00825999
NVAEVTQSEI	4.15641	2.05534	0.00488547	0.00959585
KAISGVHTV	4.18782	2.0662	1.40036e-08	8.11707e-07
AAATRTTSF	4.19365	2.06821	2.2496e-05	0.00010755
EAVHQTTQV	4.20744	2.07294	5.06571e-07	6.50437e-06
EVAQAGKAV	4.21782	2.0765	0.000628774	0.00160734
SKTVSKQQY	4.23865	2.0836	0.00219951	0.00472946
QKYAGKDGY	4.28919	2.1007	0.0017615	0.00390925
SKKPESTSF	4.31747	2.11019	0.000775494	0.00191487
GQKPGGSDF	4.35156	2.12153	3.92195e-05	0.000170457
ETANQEYKV	4.38242	2.13173	0.000441227	0.00120466
GVQAVHKAAH	4.38943	2.13403	0.000165113	0.00053152
GKAPSSSQL	4.40408	2.13884	1.9279e-05	9.55486e-05
RKGGPGSTL	4.4048	2.13908	0.000134245	0.000448883
MSVHLPFAV	4.41153	2.14128	0.00110115	0.00258277
KTASINQNV	4.41921	2.14379	0.000685249	0.00173006
GQTGTGKTF	4.41948	2.14388	3.11413e-05	0.000139949
YVASNQHEV	4.43576	2.14918	8.17543e-08	2.12967e-06
GKLGGQDSF	4.44459	2.15205	3.70893e-05	0.000162139
IATSQNRIY	4.45255	2.15463	1.71094e-05	8.67828e-05
EVFGRVQGV	4.51027	2.17321	0.00196623	0.00428112
LENAKNAY	4.5338	2.18072	5.25707e-05	0.000216348
VKAPGKSSF	4.57119	2.19257	0.00105289	0.00249037
RQYGTISH	4.60178	2.20219	0.00061079	0.0015721
GQKKQVTVY	4.60298	2.20257	6.87631e-05	0.000267783
GQRKPATSY	4.66519	2.22194	0.00299283	0.00624409
GQAHPSASY	4.68163	2.22701	2.92568e-05	0.000133347
FQKSGASVV	4.68491	2.22802	0.000295749	0.000870968
ETFGQYPLQV	4.71748	2.23802	0.00383577	0.00777885
RKNGPSTL	4.72457	2.24018	5.48776e-05	0.00022218
RKPPSSLGm	4.72487	2.24027	2.86311e-05	0.000131027
KSEDKGLSF	4.75332	2.24893	0.000345109	0.000996735
SNSDVIRQV	4.78076	2.25724	0.000911181	0.00220627
NQIPFIIQY	4.84358	2.27607	1.4304e-05	7.44715e-05
QNLGKDGLKY	4.84358	2.27607	1.4304e-05	7.44715e-05
STAPPAHGV	4.85749	2.28021	8.62571e-06	5.00826e-05
SKPQTSGAY	5.07659	2.34386	0.00297874	0.00622048
TTVRVTNSNA	5.2006	2.37868	6.36853e-05	0.000251495
IGAARTKTY	5.2102	2.38134	8.26881e-05	0.000303875
AKQDAQILY	5.21707	2.38324	0.0012243	0.00282734
AARPATSTL	5.21716	2.38326	0.000271614	0.000812672
GQKQSTTF	5.27261	2.39852	1.32455e-05	7.05274e-05
EGEGDLSISADR	5.37654	2.42668	4.61e-06	3.02002e-05
AKSTSGEGF	5.39222	2.43088	0.00411648	0.00828087
SKYAADRNHY	5.42116	2.4386	0.00160606	0.00361967
AAAGLHSNV	5.47039	2.45164	0.000203484	0.000633281
ITAKVATHL	5.51577	2.46356	0.000682279	0.00172517
GKPVQGVAY	5.58561	2.48172	4.35593e-05	0.000185926
YVTPVNRNV	5.71702	2.51526	1.15694e-05	6.34837e-05
AASQVVNRA	5.72946	2.5184	1.00973e-05	5.68639e-05
DVVTPLWTV	5.81475	2.53972	1.87246e-06	1.66144e-05
ESQVQKDGV	5.89155	2.55865	1.38088e-07	2.95509e-06
ATSYVSQSI	6.04766	2.59638	5.33029e-06	3.35494e-05
DVDVSLPKV	6.10348	2.60963	0.00256498	0.00542193
SQRDGDASL	6.1523	2.62113	0.000162325	0.000525568
TTTHITKTV	6.18191	2.62805	0.00180277	0.00398135
NAFDGPITI	6.27036	2.64855	1.47831e-08	8.11707e-07
EVTKLQQQV	6.27078	2.64864	5.34368e-05	0.000218521
FTFGSKVTY	6.31629	2.65908	0.000472232	0.00127537
AQTTRTAY	6.37133	2.67159	0.00353871	0.0072352
FQKPSGVSA	6.41704	2.68191	3.00354e-05	0.000136068
SAFGASHHV	6.54849	2.71116	7.86166e-06	4.62438e-05
SELNIVENL	6.62681	2.72831	0.00425968	0.00854597
mAQAPAQSQF	6.63399	2.72988	2.23103e-05	0.000107118
EIKDQPQNV	6.73238	2.75112	0.000117968	0.000405313
LATDILmGV	6.77647	2.76053	0.00437616	0.00874842
AKSVPTKTY	6.80321	2.76621	0.00106858	0.00252481
KKLQQTQEY	6.84916	2.77593	0.000410534	0.00113465
TTTEITHHGT	6.97581	2.80236	0.00209555	0.0045276
EGSPIKVTL	7.00021	2.8074	0.00247496	0.00524151
ETQSRTITV	7.04884	2.81739	0.000133602	0.000448064
TTSEVSWISSI	7.10378	2.82859	1.8679e-07	3.64972e-06
AAQPQPSVA	7.31834	2.87152	0.000425293	0.00116541
IKVIPTLAL	7.33935	2.87565	7.62795e-06	4.52243e-05
AVIGDVIRV	7.34427	2.87662	0.000494639	0.00131689
LQPmIVSA	7.40521	2.88854	6.25436e-06	3.80855e-05
QEEDNSTYNF	7.54609	2.91573	1.96619e-05	9.70994e-05
GKRTDEAAF	7.56783	2.91988	0.00019568	0.000615817
ETKDPSSGQEV	7.58414	2.92298	1.46392e-06	1.38211e-05
NSSPVINHL	7.65229	2.93589	0.000149606	0.000491791
AAKDPSPSV	7.68976	2.94294	2.10106e-05	0.000102188
KAYHEQLSV	7.69806	2.94449	0.000999334	0.00238123
SVSTINHQA	7.76247	2.95652	5.43085e-05	0.000220273
LTPSHIKAY	7.7902	2.96166	0.000725296	0.00182094
GKFTEGNITY	8.24334	3.04323	8.60795e-05	0.000312473
VKVDELSLY	8.30323	3.05367	0.000702381	0.00176736
FTFDQDPSVL	8.3914	3.06891	4.62052e-07	6.2095e-06
DVIGQTITI	8.54829	3.09564	2.16027e-09	4.04511e-07
TVGPVQKL	8.62774	3.10898	0.000133974	0.000448644
EVHVQEETV	8.80275	3.13795	2.80015e-05	0.000128407
SVYPNGHFV	8.80677	3.13861	0.000546939	0.00143739
KKDPNKPLTY	8.86005	3.14731	2.23762e-06	1.84173e-05
SKSPASSSL	8.86508	3.14813	0.000153987	0.00050292
ESVFVETFV	9.02607	3.1741	1.44182e-06	1.36699e-05
ILASIFETV	9.30212	3.21756	3.82279e-07	5.49942e-06
VKNPDGGSY	9.40398	3.23327	1.33718e-08	8.11707e-07
EASKVHNEI	9.42907	3.23711	0.00124665	0.00287304
VAKDPGTVA	9.46205	3.24215	2.37157e-06	1.89104e-05
DTPDINIVL	9.99269	3.32087	9.38383e-06	5.40653e-05
FSSGAIQVV	10.0628	3.33097	0.000117567	0.000404875
TTSAVTVKS	10.3379	3.36988	0.000370144	0.00104882
LSLCLVPTF	10.4706	3.38828	0.00464504	0.00917171
DVQIGDIVTV	10.7259	3.42303	2.94971e-06	2.18026e-05
ETQKEVHNL	11.0517	3.4662	0.000174231	0.000556104
SIIPPLFTV	11.071	3.46872	2.97874e-06	2.1945e-05
ELPAILQQV	11.1365	3.47723	3.81158e-06	2.6434e-05
EILAPLQNI	11.1365	3.47723	3.81158e-06	2.6434e-05
VAGSAEANAF	11.6495	3.54219	1.91818e-09	3.91832e-07
QTPDFIVPLTD	12.305	3.62117	3.46991e-05	0.000153692
FAVGVQQVL	13.0615	3.70725	4.86536e-08	1.60934e-06
NTIDPSHPm	13.3264	3.73621	1.45465e-07	3.08357e-06
FAYPAPLEV	13.3302	3.73663	1.68804e-07	3.43611e-06
AKAPSLTF	13.4272	3.74709	1.49563e-09	3.36069e-07
TTAKPQQIQA	13.5225	3.75729	5.31568e-05	0.000217962
TAAGVDHRV	13.8355	3.79031	0.000934909	0.0022516
EVVHTPETSV	13.9728	3.80455	2.51153e-05	0.000117571
TSSDIQNSV	14.3316	3.84113	4.79906e-05	0.000201185
ELFPIQmEGV	14.8232	3.88979	6.69446e-07	8.0441e-06
AKNPKIAVS	16.1969	4.01765	4.17446e-05	0.000179694
INMFLFSYP	16.5583	4.04948	4.81858e-05	0.000201626
QIPGALQSG	16.7307	4.06442	0.00037689	0.00106391
VAHGKSTVV	16.7718	4.06796	0.00311428	0.00644956
APmYFFLLN	17.4039	4.12134	2.58901e-07	4.34142e-06
TTATVTTTQA	17.721	4.14739	8.2612e-05	0.000303875
EVWGEEFEKL	17.7652	4.15098	3.87267e-07	5.50753e-06
EVTPPVLSV	17.8364	4.15675	1.58762e-08	8.11707e-07
EVAKLFADA	18.0608	4.17479	6.18012e-09	6.31215e-07
SVAPSSTNV	18.5603	4.21415	7.42562e-05	0.000281372
DIWSLGVVLY	18.7541	4.22914	6.05737e-06	3.71883e-05
FAFPGSTNSL	19.5268	4.28738	1.11576e-06	1.15006e-05
KAFQNPSTV	19.5579	4.28968	9.84002e-05	0.000349297
EINKELNQV	20.9038	4.38569	0.000246622	0.000750123
KQFEGSTSF	21.2521	4.40954	0.000160825	0.000522215
EVANLLQGV	21.5452	4.42929	2.64758e-07	4.37434e-06
HSAGYILGSVNV	21.5533	4.42984	1.84511e-07	3.64641e-06
VDIINAKQ	21.7774	4.44476	0.000221949	0.000680738
AAAATGRLL	22.1654	4.47024	0.000282725	0.00084032
VGGEALGRLL	22.5359	4.49416	3.7323e-06	2.61898e-05
YSSPVNSSA	23.1184	4.53097	0.000104028	0.000365236
SQIYQSIEF	24.066	4.58892	2.332e-06	1.88602e-05
STYPIKNEV	24.9621	4.64167	5.08697e-06	3.23808e-05
VAQAPWKAV	25.6857	4.68289	9.66094e-06	5.48185e-05
ETFGDYPQPQL	26.029	4.70205	1.52187e-08	8.11707e-07
EVINESNSV	28.1085	4.81294	9.64328e-06	5.48185e-05
FSMYKPITY	28.2254	4.81892	1.01827e-05	5.72015e-05
TTTKLVYQI	28.2431	4.81983	2.54682e-07	4.32792e-06
ELTPVAIQA	28.4135	4.82851	1.36879e-09	3.36069e-07
DIFRYQDEV	28.5675	4.8363	1.0387e-08	8.11707e-07
VmINKATPY	30.1415	4.91368	2.92555e-06	2.17672e-05
LAKQPGVSV	31.1422	4.9608	0.000264646	0.000798202
NVIGEPFLNV	31.7088	4.98681	8.19624e-06	4.78363e-05
SSQFGGGSQY	31.7874	4.99038	1.1106e-05	6.17701e-05
SVAQVKAmI	33.6111	5.07087	3.9701e-05	0.000171554
HAIDRVTTSV	33.6176	5.07114	0.000199839	0.000624224
EATGLTTTQV	33.7973	5.07884	1.04891e-06	1.10136e-05
YNFEKPVVm	36.2755	5.18092	1.81005e-05	9.05829e-05
ITGPIAKL	36.5118	5.19029	4.20462e-06	2.86419e-05
QAFKGVIYL	36.5631	5.19232	1.68203e-06	1.54266e-05
KTTTIAVEV	37.3299	5.22226	0.00019551	0.000615817
EIQGNINHV	37.5869	5.23216	0.000163581	0.000528871
LISGVVHEI	37.6596	5.23494	1.15851e-06	1.17322e-05
DVFSPSHAI	41.8703	5.38786	1.4813e-07	3.11073e-06
DVNLPGVNV	43.6789	5.44886	2.94146e-06	2.18026e-05
DTFSVIKEV	45.9795	5.52292	2.07863e-05	0.000101316
MATPLLmQA	46.6957	5.54522	1.2907e-05	6.9549e-05
STFDHPELV	48.9199	5.61235	6.64539e-07	8.02806e-06
ETIPSEIQV	50.0455	5.64517	1.1704e-07	2.73946e-06
LKNGALVVY	50.6028	5.66115	4.22357e-07	5.82231e-06
SFPTTKTYFPHF	54.3516	5.76425	6.3208e-05	0.00025005
ETSTVITHV	60.6901	5.92339	8.51357e-07	9.71065e-06
EDDGSIIRDL	61.2482	5.93659	6.07925e-06	3.72209e-05
LFQQLAPLY	67.2169	6.07075	1.21193e-05	6.56194e-05
KLFPGSPAIY	67.2169	6.07075	1.21193e-05	6.56194e-05
NIPSFIVRL	70.288	6.13521	2.13559e-05	0.000103419
WTAGFEGYS	73.1264	6.19232	0.000181301	0.000576214
KQASGNIVY	78.3952	6.29269	0.000361821	0.00103045
QIFPEVAA	78.9164	6.30225	8.4852e-05	0.000308515
LQPmVSAL	78.9164	6.30225	8.4852e-05	0.000308515
VVYPWTQRF	100.648	6.65317	7.32823e-07	8.61349e-06
ESINHVVVF	108.045	6.75549	2.08166e-06	1.77178e-05
VHASLDKF	114.229	6.83578	0.000464939	0.00125718
TSSKVIQSV	119.89	6.90557	0.000303054	0.000888984
WSLVNDTVKTP	121.88	6.92932	3.36243e-06	2.41386e-05
DEVGGEALGRL	129.851	7.02071	1.00074e-06	1.07079e-05
VDPVNFKL	194.829	7.60606	2.37326e-06	1.89104e-05
NTIPFIIRY	220.43	7.78417	9.61517e-06	5.48185e-05
EVGGEALGRL	231.172	7.85282	2.20702e-06	1.82995e-05
VVYNRLPGmF	271.414	8.08435	1.33939e-06	1.29725e-05
FTPPVQAA	311.368	8.28248	1.06717e-06	1.11531e-05
VGGEALGRL	327.512	8.35541	3.93854e-07	5.56597e-06
WWERLWLPVNLT	360.103	8.49227	2.33535e-06	1.88602e-05
YEFGICVLDQ	681.012	9.41154	2.12674e-06	1.78981e-05

## Sheet: Sheet2
Dataset 1
Volcano plot analysis between WT (condition 1) versus φloop G30L (condition 2)
Sequence	fc(cond1/cond2)	log2 fc(cond1/cond2)	p_value	corrected p_value
TASKVIVAV	0.00578552	-7.43334	9.20385e-06	0.000186005
QASPFVLRA	0.0199689	-5.6461	4.35566e-06	0.000116996
SNSDVIIYV	0.0321066	-4.96099	1.09155e-05	0.000203182
SIYGSYRNF	0.0326464	-4.93693	1.58793e-06	6.70775e-05
AHLNPAVTF	0.0369384	-4.75874	1.1899e-05	0.000212995
YAAPPSPPL	0.0384609	-4.70047	1.68282e-05	0.000259261
KQMEQISQF	0.0387251	-4.69059	5.47315e-05	0.00062441
AQIKFLNTY	0.0426691	-4.55066	3.24134e-06	9.29477e-05
EVIEKFDYV	0.0430837	-4.53671	8.36169e-06	0.000173956
YKVEYPImY	0.0537359	-4.21797	6.64637e-06	0.000151652
YTFESTIIY	0.0549338	-4.18616	5.62006e-06	0.00013552
FSAGEPRVL	0.05524	-4.17814	8.49421e-06	0.000174997
SSVPGVRLL	0.0596895	-4.06638	3.49371e-06	9.88487e-05
NAYDFIMKL	0.0605104	-4.04667	0.00194266	0.00794281
GKFGITSAF	0.0615697	-4.02164	5.60849e-06	0.00013552
AKAQSGLAF	0.0660368	-3.92059	1.23461e-05	0.000212995
DTAHVLFTL	0.0686201	-3.86523	6.31882e-06	0.000148984
FAFEHSEEY	0.075021	-3.73656	1.61214e-06	6.70775e-05
QAFRVAAL	0.0759621	-3.71858	1.19648e-05	0.000212995
DVFDKFISA	0.078135	-3.67789	2.50292e-05	0.000349421
EGYPGQRYY	0.0820524	-3.60731	1.2304e-05	0.000212995
EVSNLYNNI	0.0870121	-3.52264	1.6365e-05	0.000257234
ETMNNIDRL	0.0927899	-3.42989	8.6611e-05	0.000882061
GKVDGLAAL	0.0964031	-3.37478	6.52466e-06	0.000150493
LSmYQAAR	0.0980635	-3.35014	0.000838798	0.00426841
ELSNVLAAm	0.10246	-3.28686	2.88474e-05	0.000389899
TTFNIDDQYL	0.103839	-3.26758	6.10478e-05	0.000681807
EVSLPSVEV	0.112981	-3.14585	0.000158379	0.00134799
ETNLDSLPL	0.115375	-3.11559	1.29022e-05	0.000219028
IQNDRQLQY	0.117875	-3.08467	3.10344e-05	0.000409038
FSYGRALQA	0.122226	-3.03237	7.51781e-06	0.000164462
FVNDIFERIA	0.123036	-3.02284	1.07036e-05	0.000201001
FKIEPPGLF	0.123933	-3.01237	6.09058e-06	0.000145216
YLGEFSITY	0.127805	-2.96798	0.000175211	0.00143551
AQLERQLQF	0.128067	-2.96503	1.73986e-05	0.000263713
ETSELVHSL	0.137283	-2.86478	1.41574e-06	6.3919e-05
KASEWVQQV	0.14274	-2.80854	0.000778068	0.00402697
SVIDIINGEA	0.151794	-2.71982	9.76742e-05	0.000950755
NAYDFImKL	0.168912	-2.56566	2.10733e-06	7.45727e-05
YAYATVLTF	0.170524	-2.55195	0.000149902	0.00130902
EVLQILTQV	0.178539	-2.48569	0.000214783	0.00166949
GKAPNILLY	0.183268	-2.44797	0.00135285	0.00604369
LSFQEVREY	0.185515	-2.43039	1.71595e-05	0.00026196
NDELNKLL	0.186246	-2.42472	0.0019153	0.00786698
HAVEWPVVm	0.19045	-2.39252	0.00117271	0.00543811
YTYPWVYNY	0.196948	-2.34412	1.41527e-05	0.000232807
FAMTNQIL	0.203935	-2.29382	2.46474e-05	0.000348678
DLAPIGIRV	0.212389	-2.23522	0.00248791	0.00966978
PKGSSKVKRRV	0.217257	-2.20252	0.000154214	0.00133026
ISFPAPLYI	0.223479	-2.16179	0.000105621	0.00101415
QLPNFAFSV	0.224684	-2.15403	0.000358276	0.00230382
SISDVIAQV	0.231731	-2.10947	7.70184e-07	4.74019e-05
EASTLLAGVA	0.231731	-2.10947	7.70184e-07	4.74019e-05
FAYEGPmYL	0.241371	-2.05067	0.000340474	0.00225073
NTNGSQFFL	0.246225	-2.02195	0.00235585	0.00923748
SAYARLIDY	0.248158	-2.01067	0.000325259	0.00220375
ETSAQTERV	4.01156	2.00416	0.00124097	0.00568758
AAAGLHSNV	4.05306	2.01901	0.000298685	0.00206719
KKLSSPSNY	4.06936	2.0248	0.0014544	0.00638974
EAVHQTTQV	4.17223	2.06082	0.00073267	0.00391618
GQNKKVMIY	4.181	2.06385	0.00234144	0.00920099
KAISGVHTV	4.20639	2.07258	0.00102486	0.00490949
GKLGGQDSF	4.23855	2.08357	0.000119908	0.00110435
GQKPGGSDF	4.25772	2.09008	0.00102107	0.00490949
QHASPAGTY	4.34477	2.11928	0.000685379	0.00374839
TGKEMPQDLR	4.36531	2.12608	0.00140059	0.0061789
GQAHPSASY	4.41805	2.14341	0.000566367	0.00322206
ETANQEYKV	4.45128	2.15422	0.00100899	0.00487718
NAFHHPSAV	4.47911	2.16321	0.000327829	0.00220375
SVAPSSTNV	4.5382	2.18212	0.000774924	0.00402051
GKPVQGVAY	4.55694	2.18807	0.000178477	0.00145195
ETFGQYPLQV	4.58822	2.19793	0.00143535	0.00631913
RKGGPGSTL	4.64726	2.21638	0.000758678	0.00398121
RKNGPSTL	4.64726	2.21638	0.000758678	0.00398121
GVQAVHKAAH	4.64827	2.21669	0.00016029	0.00135512
RQIGSRSY	4.65616	2.21914	0.0014666	0.00642138
ETIPSEIQV	4.68661	2.22854	0.00207553	0.00837314
ETQSRTITV	4.78363	2.2581	0.000989707	0.00480919
STAPPAHGV	4.80805	2.26545	0.000168566	0.00140998
RQYGTISH	4.92476	2.30005	0.000338967	0.00225073
ETKDPSSGQEV	4.95874	2.30997	6.47852e-05	0.000701399
VKNPDGGSY	5.0216	2.32815	0.000681589	0.00373729
EAIGNPHHV	5.04176	2.33393	0.000262677	0.00189592
VKAPGKSSF	5.13804	2.36122	0.00136324	0.00607732
AKSVPTKTY	5.195	2.37712	0.00103548	0.00492664
ESVFVETFV	5.53051	2.46741	3.96857e-07	4.10542e-05
SAFGASHHV	5.56167	2.47552	9.93925e-06	0.000193496
SKKPESTSF	5.65593	2.49976	0.000414093	0.00256182
KSEDKGLSF	5.65593	2.49976	0.000414093	0.00256182
ILASIFETV	5.69951	2.51084	8.94317e-08	2.1086e-05
EGEGDLSISADR	5.75083	2.52377	2.49983e-05	0.000349421
SLSAIFNNV	5.7529	2.52429	0.000195501	0.0015596
HVVDFFNRV	5.79107	2.53383	0.000613346	0.00345231
ETADTAHGV	5.88515	2.55708	0.000836701	0.00426798
EVIPILEVQ	5.9226	2.56623	0.00107054	0.00505944
KKHSQFIGY	5.99924	2.58478	0.00137449	0.00611463
SKYAADRNHY	6.00774	2.58682	0.00187417	0.0077475
STSAVNHNV	6.08544	2.60536	0.000504398	0.00295715
TTTHITKTV	6.29668	2.65459	0.000817458	0.00417987
MKLLTGLVF	6.32374	2.66078	0.000189248	0.00151541
EVFGVIRSL	6.49621	2.6996	0.00164968	0.0070577
DVQIGDIVTV	6.5719	2.71631	7.95324e-07	4.74019e-05
LQWPSLTV	6.61016	2.72469	9.59238e-05	0.000942362
ETQKEVHNL	6.77137	2.75945	0.000158811	0.00134799
LFQQLAPLY	6.82264	2.77033	0.00156803	0.00676293
KLFPGSPAIY	6.82264	2.77033	0.00156803	0.00676293
TSSDIQNSV	6.84375	2.77479	0.000128235	0.00114817
HAIDRVTTSV	6.8928	2.78509	0.000114561	0.00107092
VAKDPGTVA	6.99432	2.80618	0.000762909	0.00398742
IKDNVVIVY	7.31803	2.87146	0.00218096	0.00871561
LVPEFVHNV	7.53501	2.91361	0.00123899	0.00568758
QTPDFIVPLTD	7.53966	2.9145	2.29008e-05	0.000328349
SQFKGYFIF	7.59288	2.92465	0.000330508	0.00221242
SVSTINHQA	7.60783	2.92748	3.94739e-06	0.000108784
NSSPVINHL	7.6574	2.93685	0.000887274	0.00444851
KTTTIAVEV	7.69701	2.9443	5.42575e-05	0.000622348
SVIEQIVYV	7.73797	2.95196	3.44804e-09	2.43891e-06
EVVHTPETSV	7.93788	2.98875	0.000249367	0.00183172
KVPPFTFHV	8.02741	3.00493	0.00071144	0.00384142
SQRDGDASL	8.10056	3.01802	1.17376e-05	0.000212881
QKYAGKDGY	8.26672	3.04732	0.000351267	0.00228239
VAGSAEANAF	8.36359	3.06412	0.000229813	0.00174945
TTTEITHHGT	8.37843	3.06668	0.00103533	0.00492664
TAAGVDHRV	8.477	3.08355	0.00104712	0.00497091
EASKVHNEI	9.36915	3.22792	0.000956451	0.00467647
YKNGASPVL	9.72436	3.2816	0.000324653	0.00220375
TTSAVTVKS	9.78419	3.29045	0.000196538	0.001562
SAAFIISYV	10.4238	3.3818	3.46817e-05	0.00044914
EINKELNQV	12.8088	3.67906	0.000257608	0.00187207
KQFEGSTSF	13.0221	3.70289	0.000163486	0.00137666
HSAGYILGSVNV	13.206	3.72312	2.39992e-08	8.48772e-06
MKKKTPAAPA	13.308	3.73422	8.15734e-05	0.000848523
VDIINAKQ	13.3439	3.73811	0.000230292	0.00174945
RQLTLGAY	13.6138	3.767	8.06815e-07	4.74019e-05
VGGEALGRLL	13.8078	3.78742	1.80659e-06	7.17943e-05
STYPIKNEV	15.2949	3.93498	3.16086e-06	9.29477e-05
ETFGDYPQPQL	15.9488	3.99538	1.31764e-09	1.39801e-06
PRIASNAGSIA	17.2222	4.1062	0.000254858	0.00185845
DIFRYQDEV	17.5038	4.1296	5.55345e-10	1.17844e-06
EVFGLFQKL	17.5392	4.13251	9.81398e-05	0.000950926
GKFTEGNITY	19.394	4.27754	0.000236508	0.00177968
SVAQVKAmI	20.5947	4.3642	3.85459e-05	0.00047833
EATGLTTTQV	20.7085	4.37215	5.33007e-07	4.55849e-05
KQYKVVVY	21.0507	4.3958	0.000676312	0.00371796
mKLLTGLVF	21.491	4.42566	1.87641e-06	7.23954e-05
ITGPIAKL	22.3714	4.48358	3.09063e-06	9.23706e-05
QAFKGVIYL	22.4033	4.48564	1.06126e-06	5.52971e-05
LISGVVHEI	23.0743	4.52821	6.03309e-07	4.74019e-05
KEYERAIIF	24.1426	4.59351	2.71862e-05	0.000374605
RQLPGSQRY	25.3022	4.66119	1.15607e-05	0.000211481
YAFAHILTV	27.3614	4.77407	3.8655e-06	0.000107929
DTFSVIKEV	28.1728	4.81623	2.00127e-05	0.000299064
AKQDAQILY	29.1735	4.86659	2.55416e-07	4.10542e-05
GKRTDEAAF	32.2458	5.01104	0.000143284	0.00126162
LTPSHIKAY	32.6311	5.02818	0.00131287	0.00592745
SFPTTKTYFPHF	33.3032	5.05759	6.45557e-05	0.000701399
KQFQKVITEY	34.9388	5.12676	0.000699007	0.00379359
SKSPASSSL	35.3795	5.14484	0.000126476	0.00113722
TKDGVREVF	38.1084	5.25204	0.000903717	0.00449107
GKTSLITRF	41.8184	5.38606	0.000110406	0.0010459
HKFSSAIGL	44.2984	5.46918	1.31713e-05	0.000221822
KQASGNIVY	48.0335	5.58597	0.000370919	0.00236364
VVYPWTQRF	61.6692	5.94648	6.552e-07	4.74019e-05
ESINHVVVF	66.2007	6.04878	1.93194e-06	7.32066e-05
VHASLDKF	69.9929	6.12914	0.000476304	0.00287797
WSLVNDTVKTP	74.6778	6.22261	3.24032e-06	9.29477e-05
DEVGGEALGRL	79.5623	6.31401	9.41278e-07	5.12152e-05
QLVDIIEKV	83.4813	6.38338	3.2288e-08	9.78788e-06
VDPVNFKL	119.375	6.89935	2.31773e-06	7.68473e-05
EVGGEALGRL	141.645	7.14614	2.22994e-06	7.511e-05
VVYNRLPGmF	166.303	7.37767	1.37028e-06	6.3919e-05
FTPPVQAA	190.782	7.57578	1.06842e-06	5.52971e-05
VGGEALGRL	200.675	7.64872	4.01603e-07	4.10542e-05
WWERLWLPVNLT	220.635	7.78552	2.20746e-06	7.511e-05
