# Supplementary material for: TAPBPR mediates peptide dissociation from MHC class I using a leucine lever
Source: eLife. 2018 Nov 28;7:e40126. doi: 10.7554/eLife.40126 (PMC6307860; doi:10.7554/eLife.40126)
Supplement: Figure 5—source data 9. [file elife-40126-fig5-data9.xlsx]

## Sheet: Sheet1
Dataset 2
Volcano plot analysis between WT (condition 1) versus φloop (condition 2)
Peptide	fc(cond1/cond2)	log2 fc(cond1/cond2)	p_value	corrected p_value
IAAVIARFY	30.6327	4.937	6.384e-07	1.69138e-05
ETADVIAKVAF	0.0375137	-4.73644	4.67693e-06	5.32879e-05
IATSQNRIY	49.4543	5.62803	7.20446e-06	7.36865e-05
AVANIVNSV	0.0172322	-5.85875	0.00139433	0.00406109
TAVALLRLL	28.4377	4.82973	2.01904e-06	3.28879e-05
YMVTIVHIY	28.5071	4.83325	9.63432e-05	0.000467679
FAIDPHLLLSV	254.207	7.98986	5.31742e-05	0.000284501
DIFPIVIHV	45.7552	5.51587	1.08233e-06	2.32685e-05
IAIPFLIKL	57.552	5.84679	4.45781e-05	0.000254616
RMNPNSPSITY	6.03969	2.59447	0.00293327	0.00764774
TLFGSVIRY	37.1825	5.21655	1.76203e-06	3.02712e-05
FAYGGWNYL	200.088	7.64449	7.20172e-06	7.36865e-05
DIFRYQDEV	8.70719	3.12221	0.000149166	0.000646972
NVIGEPFLNV	14.6061	3.8685	8.26181e-05	0.000405529
FSFDYIVKW	87.805	6.45623	2.7335e-06	3.87804e-05
YKIAFPYLY	27.0305	4.75652	1.23798e-06	2.49754e-05
VVYPWTQRF	138.584	7.11462	1.88227e-06	3.15963e-05
GKVGAHAGEY	7.43342	2.89403	3.19943e-07	1.13477e-05
GKYGTLQEF	8.687	3.11886	0.000778876	0.00245731
LILPGYIDF	14.091	3.81671	9.24688e-06	8.68969e-05
VALNFIISY	140.462	7.13404	0.000120508	0.000549788
YAYFNFPEL	28.0884	4.8119	1.60076e-05	0.000131346
LVSPITGEKI	0.0134491	-6.21635	2.35816e-06	3.52761e-05
TTIDVRTTF	4.12648	2.04491	0.00074055	0.00235035
ETVTATATSQV	0.158711	-2.65553	0.00062796	0.00203971
GKAFFLSSY	13.753	3.78167	2.44351e-05	0.000172221
MKIPTGQEY	8.27989	3.04961	0.000114553	0.000531439
LSFPYSYEV	42.4729	5.40847	0.000479527	0.00160833
SAYEIIRDY	4.34186	2.11831	2.21229e-05	0.000162161
YTFESTIIY	77.0085	6.26695	2.26309e-05	0.000164786
HAAGVLLHV	0.22073	-2.17965	0.000157259	0.000672786
QGYGSGRYY	13.4464	3.74915	5.23004e-05	0.000281195
DIFEFLNHV	23.2077	4.53653	0.00014983	0.000647301
RQFEFSVDSF	59.0252	5.88326	7.05969e-07	1.79971e-05
KNFPWQVFF	44.5539	5.47748	1.52337e-06	2.72583e-05
EILNIFQGV	12.392	3.63133	0.000189363	0.000768283
STIFPLDGV	11.0112	3.46089	7.10602e-06	7.33622e-05
KLFIGGLSF	5.57766	2.47966	5.07784e-05	0.00027639
NSVFVATFL	13.8722	3.79413	1.32903e-05	0.000113276
YTAEIKQNL	0.0398505	-4.64926	2.72943e-06	3.87804e-05
ELSDIAHRI	0.0222006	-5.49326	0.000134226	0.000603604
HTFFIKDSL	0.127724	-2.9689	0.00060738	0.00198165
ESAGLGYRV	0.0148471	-6.07368	1.47389e-05	0.000123706
EIFSKNYRV	0.00790046	-6.98385	0.000556294	0.00182854
YTFGRIVIY	4.47098	2.16059	3.01117e-05	0.000194079
HVIEKMHHV	0.13985	-2.83805	0.00128448	0.00377616
WAYPRQVFI	5.77535	2.52991	0.000124514	0.000566887
HSVYITSRV	0.0155163	-6.01007	0.000219157	0.000866773
ETFMNRVEV	0.121761	-3.03788	0.00100584	0.0030466
RTTEINFKV	0.096351	-3.37556	0.000191015	0.000773559
mTPEIIQKL	0.0796913	-3.64943	2.88903e-05	0.000190178
ETFEKTPVEV	0.226569	-2.14198	2.68812e-05	0.00018311
GKWKQISKY	0.0657916	-3.92595	0.00207269	0.00570971
EAIDFIDSI	69.9629	6.12852	9.14468e-07	2.13927e-05
TSAAIYHVL	0.0168187	-5.89379	5.9241e-06	6.44905e-05
EVIGGTNHTL	0.243384	-2.03869	0.000538144	0.00177685
NVTWVIVNL	18.4258	4.20366	0.000188826	0.000767521
EVAKMIQEV	0.00439044	-7.83142	7.96e-07	1.90261e-05
EVFDEKIEV	0.0545287	-4.19684	3.97459e-07	1.30449e-05
KSFEGLFYF	44.6033	5.47908	1.39827e-05	0.000118261
SVALVIHNV	0.0298681	-5.06525	2.01544e-05	0.000152826
FAYEGPMYL	39.0569	5.28751	1.07392e-05	9.56096e-05
FVEWIPNNV	6.34526	2.66568	3.65285e-06	4.71311e-05
TASKVIVAV	0.00169253	-9.2066	0.000339464	0.0012359
DTSPVFQRL	0.015821	-5.98202	8.03586e-05	0.000395321
SAYPLSVEW	4.95349	2.30844	0.000196273	0.000790021
ETAQAIKGMHI	0.149033	-2.7463	0.000109212	0.000514894
DSFNYFINV	12.802	3.6783	2.06228e-05	0.000154776
TTFEHAHNMRV	0.117027	-3.09509	4.82939e-06	5.47414e-05
EIFDKIHSL	0.160234	-2.64175	0.000159917	0.000680188
ISPSHIWIF	12.1926	3.60794	3.62332e-05	0.000224442
TTFESSHYLL	0.0110313	-6.50226	2.1084e-07	8.27925e-06
MRYVASYLL	6.27281	2.64911	0.00231795	0.00627731
FSYVTPRAF	23.5115	4.55529	2.12606e-06	3.30635e-05
RQKGTGKEY	4.54842	2.18536	0.00328448	0.00847721
DTFPTAMHI	0.0255811	-5.28878	2.34185e-05	0.000167744
YSYPELVKM	6.8546	2.77707	0.00118461	0.00351548
ELYYRAIQF	42.6368	5.41403	9.61982e-07	2.20107e-05
HGIDPTGTY	5.7008	2.51117	4.41976e-07	1.33138e-05
EIVQFFSGL	34.3506	5.10226	0.000313863	0.00115998
FSFPGELLm	75.8963	6.24596	1.0515e-05	9.3994e-05
ETSDILHRM	0.028876	-5.11399	0.000146528	0.000639314
DTFSGQFVL	29.6741	4.89113	0.000168354	0.000695886
GTYFNPHTV	0.00748307	-7.06215	1.62023e-07	6.72241e-06
YTFPGILKW	18.3528	4.19793	3.56734e-06	4.66939e-05
EVIKELAQI	0.0232495	-5.42666	0.000100366	0.000482288
KAFARPWSL	39.6951	5.31089	2.61243e-05	0.000181711
YIFEEPFTI	16.6093	4.05392	3.31719e-05	0.000210824
ALPEFTSIF	17.7199	4.1473	7.37359e-05	0.000370195
KQmEQISQF	12.8065	3.6788	0.00014222	0.00062299
DVIGQTITI	12.5287	3.64716	0.000109829	0.000516054
ETSGIGEARV	0.248268	-2.01003	2.70533e-05	0.00018311
FLFDGSPTYV	59.9652	5.90605	0.00190535	0.00529691
ETITGQHPA	0.157849	-2.66338	3.44601e-07	1.20036e-05
MSSSVAVQA	0.0320031	-4.96565	5.14216e-07	1.48784e-05
NAYTGIVLL	56.4828	5.81974	0.0038489	0.00967283
EISSILKEL	0.184788	-2.43605	0.000475125	0.00160492
FAFPDEFVF	31.0484	4.95645	4.1698e-05	0.000245171
STAAVIQNV	0.140247	-2.83396	0.00141299	0.00408838
HTAEITHEI	0.239577	-2.06144	0.000327978	0.00120405
ETYPDAVKI	0.00957123	-6.70708	1.4378e-06	2.67295e-05
ETFKNSFVEA	0.1041	-3.26395	0.000636766	0.00206526
STSNIQVGL	0.0330064	-4.92111	0.000166893	0.000693757
ITAPPTPGI	0.0260142	-5.26456	0.000130651	0.00058994
GKYASIILF	4.5602	2.1891	1.04157e-05	9.3994e-05
NVAEINRQV	0.0229594	-5.44477	2.30068e-05	0.00016697
STAAVFHAV	0.0196055	-5.6726	1.87118e-05	0.000148011
TVADKIHSV	0.036396	-4.78007	0.000159127	0.000678142
YLGEFSITY	41.343	5.36957	0.00135741	0.00396407
NFFPGVFEY	24.8143	4.6331	0.000353841	0.00126789
NTFFSETGA	7.34979	2.8777	0.00149747	0.00429327
STSDLYNFQV	0.00651784	-7.26139	2.32999e-05	0.000167439
ETKFQVDKV	0.0457385	-4.45045	0.000396253	0.00137974
ELANLYHHV	0.0205081	-5.60766	0.000145277	0.000635119
AAFEGTVFF	23.6254	4.56227	0.00369392	0.0093367
LVPEFVHNV	0.130719	-2.93546	0.000533569	0.00176439
DVASIKEKV	0.0422745	-4.56407	0.000110333	0.000517317
TTSAVTVKS	0.145921	-2.77674	0.00191466	0.00531607
NVFEGFYGV	17.5165	4.13064	0.00011447	0.000531439
EVAMMPHLV	0.0345921	-4.85341	7.37394e-07	1.80365e-05
MMIPSQISY	40.7082	5.34725	1.09937e-08	1.05109e-06
ETIRNIPHL	0.0268706	-5.21783	0.000197818	0.000792354
KSIARVLTV	0.0181142	-5.78674	0.000795717	0.00250326
DTSSLFDKL	0.249522	-2.00276	3.15806e-08	2.24019e-06
SIIPPLFTV	19.8089	4.30807	2.44283e-05	0.000172221
SASKIIVFV	0.237535	-2.07379	0.00273141	0.00721053
SMLSELSII	12.812	3.67942	1.95043e-05	0.000149965
GKAWGILTF	10.9716	3.4557	9.33628e-06	8.73637e-05
EGAAVFWNV	20.0111	4.32273	4.30392e-05	0.000249285
EVMSVIAQV	8.7688	3.13238	0.000287649	0.00108684
EAAELMQQV	0.0153196	-6.02848	9.89351e-05	0.000479203
ETQRQMAHV	0.089039	-3.48942	0.00351243	0.00893962
MFLADVVDF	75.8963	6.24596	1.0515e-05	9.3994e-05
TVFNFPVSI	29.3481	4.8752	6.94972e-05	0.000355965
FTFGSKVTY	50.2547	5.65119	1.15459e-05	9.99581e-05
NAFSGVMML	88.561	6.4686	4.20512e-05	0.000246381
RKPCSVTSY	5.62098	2.49082	0.0011707	0.00348357
EVANLLQGV	0.043156	-4.53429	0.000138473	0.000613915
ETAENILGV	0.175119	-2.51359	5.09901e-05	0.000276857
DVFHmVVEV	12.2094	3.60992	0.000479793	0.00160833
HTVWIPWNV	6.25999	2.64616	0.000100449	0.000482288
TKISTHVSF	45.0427	5.49322	0.000358072	0.00127411
ISFPAPLYI	5.20345	2.37947	0.00355397	0.00900365
EVASNVPKV	0.119232	-3.06815	4.3078e-05	0.000249285
ESIKNQMTV	0.0793615	-3.65542	4.22281e-06	4.93934e-05
AQISWVTVF	17.1747	4.10222	0.000236678	0.000926075
ALMPPFTAF	34.9558	5.12746	6.36775e-05	0.000330252
ETSPHTFQL	0.155158	-2.68819	0.000652809	0.00210488
QFETKKLY	25.8704	4.69323	0.00353546	0.00897571
HSAAPSPQV	0.021072	-5.56853	4.62528e-05	0.000260795
SNSDVIIYV	0.0113833	-6.45693	0.000197323	0.000791812
ATSSVFQEV	0.0248263	-5.33198	5.41256e-05	0.000288286
PQCPSGRVY	57.1464	5.83659	0.00175271	0.00490983
TVmEAISIL	12.812	3.67942	1.95043e-05	0.000149965
TKVYGLmYF	44.6033	5.47908	1.39827e-05	0.000118261
ESSKVVKKV	0.13578	-2.88065	0.000150807	0.000647704
HAANIVTAI	0.204374	-2.29072	1.11942e-05	9.86767e-05
EAMRIGAEV	0.0421484	-4.56838	9.15344e-06	8.63881e-05
KKLPKGTVSF	0.0496652	-4.33162	0.00037775	0.00133549
AMASIINRL	0.0127807	-6.28989	3.6714e-05	0.000225514
NAYDFImKL	0.0427753	-4.54708	0.000106094	0.000503892
FASFILRTL	9.07879	3.1825	3.16162e-05	0.000202105
AKLDHVNIVHY	0.0358487	-4.80194	1.8512e-05	0.00014696
VKVDLSEKY	0.0596953	-4.06624	0.00140698	0.00407634
NKYMGLTQF	4.2824	2.09842	0.00337824	0.00866806
AKYLDEDTIY	9.91366	3.30942	4.07644e-05	0.000242273
AKWLQDEMF	9.04591	3.17727	0.000364097	0.00128929
FSYAFPKAV	4.19461	2.06854	0.000740696	0.00235035
HAAELIKTV	0.027431	-5.18805	0.000238438	0.000929654
SQYNIRGVTY	6.2568	2.64543	0.00078092	0.00246023
MASRVLAAL	0.0384406	-4.70123	0.000192132	0.000776653
mTNDKTAKV	0.199393	-2.32631	1.55608e-05	0.00012864
KASEKILQV	0.105454	-3.24532	0.00143837	0.00414002
AKVKATTSL	0.22152	-2.17449	0.00283315	0.00742428
AQPETRVSY	8.25526	3.04531	0.00141925	0.0040957
DTAHVLFTL	0.176315	-2.50377	0.00018492	0.000755836
FQAPRNPTL	5.33961	2.41673	6.3388e-05	0.000329528
ESFSDYPPL	9.66087	3.27215	0.000394847	0.0013782
HACGVIATI	0.0147961	-6.07864	9.87711e-06	9.13905e-05
ESAGPSRAV	0.197003	-2.34371	0.000447984	0.00152358
EASFVLHTI	0.0556305	-4.16798	0.000220356	0.000869952
ITAPIEAQV	0.032507	-4.9431	0.000279099	0.00106367
ETFPANIQVV	0.192294	-2.37861	5.2275e-05	0.000281195
RHKFPDEDSY	0.0440936	-4.50329	0.000263202	0.00101541
QTSAVVKNL	0.0554772	-4.17196	0.000150349	0.000647704
GKMNPQSAF	5.54062	2.47005	0.00270342	0.00714522
EAVGKIFSNV	0.0587999	-4.08804	0.000420359	0.00144885
TVADMLHVV	0.0857507	-3.54371	0.000106005	0.000503892
FISLLDSQL	0.147193	-2.76422	0.000150621	0.000647704
MAGPLRAPL	7.26879	2.86172	0.000530326	0.0017563
ETADTAHGV	0.181247	-2.46397	2.61948e-05	0.000181711
AmNPTNTVF	4.82764	2.27132	0.000109348	0.000514894
SKMGKQLTY	0.0661619	-3.91786	0.00153582	0.00436904
VKVDELSLY	5.33647	2.41589	3.00657e-06	4.08114e-05
SAVNIIRTF	9.61761	3.26568	3.59409e-06	4.67656e-05
YAFAHILTV	74.6887	6.22282	7.68245e-06	7.57804e-05
LSFQEVREY	39.5176	5.30443	0.00011579	0.000536045
KKIEFGVVY	5.68656	2.50756	0.0011684	0.00348145
LSFPTTKTY	4.73672	2.24389	6.93474e-06	7.20582e-05
EIAEAYLGYPV	63.0334	5.97805	4.57525e-06	5.24009e-05
NAMDVVVQF	10.2352	3.35546	0.0026194	0.00696875
YLLPDTKAY	50.2509	5.65108	0.000438438	0.00149942
LVPPWTRVY	6.88076	2.78257	0.000166021	0.000691441
SQLPKLLVY	25.4671	4.67056	1.02024e-05	9.27074e-05
EVAPPPPPV	46.8601	5.55029	0.00353434	0.00897571
IIVDIFHGL	14.5189	3.85986	2.78047e-06	3.9194e-05
GKNLYTNEY	22.0998	4.46596	8.54801e-07	2.02119e-05
SKASQFTGY	23.7379	4.56912	3.28592e-06	4.35285e-05
GQFLVKSGY	80.4987	6.33089	1.44648e-06	2.67295e-05
GKFTEGNITY	57.8522	5.8543	6.50276e-06	6.94154e-05
GKYFEPEAY	37.1332	5.21464	6.94695e-06	7.20582e-05
YKFDFPVSY	17.7626	4.15077	1.32472e-05	0.000113276
VKYIQQENF	62.5991	5.96807	7.804e-06	7.59337e-05
LLYESPERY	92.6596	6.53387	3.84846e-05	0.000233778
ETNLDSLPL	11.8397	3.56556	4.05341e-05	0.000242213
AKAGGFVVGY	21.3944	4.41916	5.18148e-06	5.7838e-05
KKFASFNAY	22.7316	4.50663	0.000196517	0.000790021
KLNGQVLVF	34.7264	5.11796	4.8974e-05	0.000269234
FVYENPISL	4.70284	2.23353	0.00252296	0.00672483
KLYQEIISY	24.5437	4.61728	7.86505e-05	0.000387786
FKFmPPPTY	128.617	7.00694	4.11016e-06	4.86567e-05
YAYPGVLLI	31.4306	4.9741	0.000138944	0.000614762
HKVANTSSF	5.50204	2.45997	9.94291e-05	0.000479484
KEYERAIIF	43.4266	5.44051	6.62518e-06	7.03806e-05
AKAYPPTSM	37.9855	5.24738	2.23935e-05	0.000163599
YQILQGIVF	14.7675	3.88436	8.92655e-05	0.000436211
RQYEQQTY	6.82388	2.77059	0.000478091	0.00160833
LKNGALVVY	6.75799	2.75659	0.000730033	0.00232684
AKFVDGEWY	30.1484	4.91401	4.89311e-08	3.07427e-06
YAPNRTITV	74.6887	6.22282	7.68245e-06	7.57804e-05
FASEYPLIL	32.4134	5.01852	2.93121e-06	4.05356e-05
AQMAQILSF	22.865	4.51507	0.000107317	0.000508599
RQKFSEQVF	26.0037	4.70064	9.91994e-05	0.000479427
LKPNTSVQF	64.0963	6.00217	2.73124e-05	0.00018311
AKLPTGTTL	0.0415844	-4.58781	1.19877e-06	2.44083e-05
LQQTGVLGAF	64.0963	6.00217	2.73124e-05	0.00018311
GQIPQILYY	26.6388	4.73546	1.90913e-06	3.18043e-05
AAATRTTSF	12.608	3.65626	5.62689e-06	6.15907e-05
FQKVITEY	7.42399	2.8922	0.000281097	0.00106943
GKFNVLLTTY	4.39825	2.13693	0.00246348	0.00660632
FAFEEAIGY	27.0697	4.75861	2.69596e-05	0.00018311
WQKGIGEFF	8.02378	3.00428	0.000138102	0.000613551
SQRAGLQF	8.12656	3.02264	0.000380383	0.00134264
RKVADVSQF	5.08395	2.34595	0.00341626	0.00873858
MSVHLPFAV	12.7552	3.67302	8.69977e-06	8.28173e-05
KSVDWLLVF	44.9476	5.49017	3.96779e-06	4.83724e-05
SIWPLIRIY	20.6003	4.36459	1.08989e-06	2.32685e-05
MTVDDLLSL	13.5466	3.75986	0.000496271	0.00164849
ESSDVIRLI	0.0467246	-4.41967	6.18832e-06	6.67065e-05
LTVPFARYL	24.2166	4.59793	5.99482e-05	0.000313872
STADFQVGV	42.862	5.42163	0.00131889	0.003867
LAYNEIITI	14.3457	3.84255	2.86622e-07	1.05047e-05
TVISILNTI	12.2272	3.61203	1.18803e-05	0.00010245
ETAGFQEGV	6.42373	2.68341	0.00141498	0.00408876
GQIPEIIFY	11.2986	3.49808	1.91731e-05	0.000149965
VAYPLYILY	15.0308	3.90985	1.52468e-06	2.72583e-05
ASIMYACVLF	10.5841	3.40383	4.43383e-05	0.000253906
MAFDPTSTLL	22.7797	4.50967	4.45462e-06	5.14882e-05
ETANKIFMV	0.00564176	-7.46964	0.000161821	0.000682743
ETNSILQEL	0.115638	-3.11231	0.00011652	0.000537165
FAFPGSTNSL	13.4395	3.74841	2.96433e-05	0.000192288
MSIETLLEA	13.5466	3.75986	0.000496271	0.00164849
NTIDPSHPm	9.48798	3.2461	2.84853e-05	0.000189816
SAFGFPVIL	57.6402	5.849	7.84094e-05	0.000387466
FFIAGRYEF	22.6962	4.50438	2.51892e-06	3.66256e-05
SQYPFPVTLY	31.7379	4.98814	3.81414e-06	4.82028e-05
SQARTLITF	6.44205	2.68752	0.00251713	0.00671744
ETSSWVNLV	0.228083	-2.13237	0.00150801	0.00430106
LRNETNLAY	5.02952	2.33042	0.00140041	0.00406803
LQHPDVAAY	6.44695	2.68862	0.00283602	0.00742428
ISmILSEAI	12.812	3.67942	1.95043e-05	0.000149965
AmYGGLVLF	34.1033	5.09184	0.000487837	0.00163032
LmNNHMKLI	39.6311	5.30856	2.08788e-06	3.30354e-05
ISLmFLLSY	4.757	2.25005	0.00353885	0.00897571
EQYEQILAF	45.181	5.49764	1.98141e-05	0.000151754
IAAQAKLVY	6.75799	2.75659	0.000730033	0.00232684
FmVSQVLF	34.1033	5.09184	0.000487837	0.00163032
VKVPTTLAEY	19.9098	4.31541	0.000213721	0.000846796
TVSEVIQGLL	39.6481	5.30918	2.45344e-06	3.59674e-05
SQLVAGVAF	36.691	5.19736	4.59637e-05	0.0002605
AQVVQWVSF	21.5042	4.42655	0.000271848	0.00103964
VKPRYGLVTY	45.5909	5.51067	2.03751e-05	0.000153968
VAIVRPSIV	23.8685	4.57703	6.2806e-05	0.000327276
SQFPQPQHF	38.594	5.2703	2.17717e-06	3.32696e-05
MSFGNVVEL	18.5112	4.21033	1.1409e-05	9.95568e-05
KGFAFVQY	38.718	5.27493	0.000139571	0.000616299
RQIDLVDNYF	24.4932	4.61431	4.36661e-05	0.000251366
YAYATVLTF	17.0155	4.08878	3.01841e-05	0.000194079
GQVQKIVLY	65.4342	6.03197	2.08737e-06	3.30354e-05
GQIEPSFVF	16.181	4.01623	1.44579e-06	2.67295e-05
SQFHGLITHY	22.2829	4.47786	1.91875e-05	0.000149965
RQLPAmTAL	26.2432	4.71387	3.70648e-06	4.71311e-05
QSFPEPLII	46.8677	5.55052	1.00146e-05	9.17589e-05
RQALLLLAL	36.3857	5.1853	0.000947962	0.00289122
RSLQENIAY	5.02952	2.33042	0.00140041	0.00406803
TTFEYPNTI	42.8362	5.42076	2.89287e-05	0.000190178
QMFQGIILF	4.75467	2.24935	0.00016522	0.000689504
IQADAKLQF	64.0963	6.00217	2.73124e-05	0.00018311
FVIRNIVEA	33.9431	5.08505	2.54861e-05	0.000177917
LTSDIIESI	0.249188	-2.0047	2.10482e-05	0.000155842
SQRDGDASL	9.02204	3.17345	2.56396e-12	5.63814e-09
mAQSRVLLLL	25.5186	4.67348	1.80669e-05	0.000143946
SVHVGQAGV	9.57256	3.2589	5.95572e-07	1.63708e-05
KQLEDGRTL	11.8338	3.56484	0.000139927	0.000616504
FmLRAVSIF	12.1926	3.60794	3.62332e-05	0.000224442
GKRTDEAAF	9.15546	3.19463	1.4568e-05	0.00012274
AKVLTPELY	61.1668	5.93468	2.09876e-05	0.000155842
EGVDIILGV	15.2339	3.92922	0.000296059	0.00110909
VTPSEVVPV	4.71454	2.23712	0.00341755	0.00873858
STFDHPELV	9.15092	3.19392	5.15956e-05	0.000278768
ETFDQISKV	0.0242084	-5.36835	7.12027e-07	1.79971e-05
DTKAILEQI	0.0888728	-3.49211	4.06706e-05	0.000242273
ESADIARAEV	0.0192729	-5.69728	5.15839e-05	0.000278768
RGFGFVTY	8.52789	3.09219	2.13507e-06	3.30635e-05
EVAKIIYIV	0.113938	-3.13368	0.000300962	0.00112172
DISDVAFLV	7.61826	2.92946	0.00031462	0.00116082
LENLFFSAV	34.3506	5.10226	0.000313863	0.00115998
FTADKYHVV	0.0414077	-4.59396	0.000448274	0.00152358
ETNIRVVGGL	18.4258	4.20366	0.000188826	0.000767521
EVAEAIQTV	0.0214118	-5.54545	0.000160908	0.000682743
STYPRPHEYL	0.0159697	-5.96852	0.000120001	0.000549689
TTILIPYHI	0.0286858	-5.12352	9.50966e-06	8.86091e-05
AFFVREALF	12.1926	3.60794	3.62332e-05	0.000224442
FGLSEVTSV	26.1609	4.70934	1.04822e-05	9.3994e-05
KKNPSSVKF	0.233852	-2.09633	4.21278e-05	0.000246381
NTSHILEAI	0.0231281	-5.43421	1.11036e-06	2.34778e-05
MTSPCHFTL	0.127757	-2.96853	0.000184842	0.000755836
ETNAVHVNV	0.171207	-2.54619	0.00140261	0.00406905
YASGINVNL	0.0329997	-4.9214	0.000299763	0.00111915
IQESISQEL	0.183325	-2.44753	0.000224193	0.000883511
RKLWVGYQY	0.138565	-2.85137	0.000925571	0.00283078
AAYGNVIVA	44.8802	5.48801	7.68487e-06	7.57804e-05
FLEVAQITL	4.32123	2.11144	0.000386762	0.00135861
KAFGSTIVI	40.2982	5.33264	2.35041e-05	0.00016781
AFFSHILSL	74.6887	6.22282	7.68245e-06	7.57804e-05
SIFITNVTY	4.73672	2.24389	6.93474e-06	7.20582e-05
IKSPQVQSF	64.0963	6.00217	2.73124e-05	0.00018311
KAFDYPSLF	18.2316	4.18837	1.42182e-06	2.67295e-05
AKNNVVINY	30.5014	4.9308	1.40585e-07	6.06169e-06
RQLIVKEY	20.0457	4.32522	5.43552e-06	6.03673e-05
MKLPESVKL	0.190424	-2.39271	0.000849404	0.00262706
KSFGSAQEF	20.4634	4.35497	4.29356e-07	1.33138e-05
MGALATYIF	32.8767	5.03899	0.0012454	0.00367603
SLMSLLESL	12.812	3.67942	1.95043e-05	0.000149965
HTAAPTDPA	13.4161	3.74589	9.07507e-08	4.77009e-06
YTFSKYYF	31.0484	4.95645	4.1698e-05	0.000245171
AAAHFYFEL	67.9625	6.08667	0.000518425	0.00171948
MAAPLVLVL	15.7394	3.97631	8.33236e-05	0.000408082
FIIDDKGIL	4.32123	2.11144	0.000386762	0.00135861
ATYNEIVTF	26.7637	4.74221	3.12833e-06	4.19463e-05
SQFPGAITL	18.1049	4.17831	0.000809126	0.00252737
VFIYPSLIY	15.0308	3.90985	1.52468e-06	2.72583e-05
DVImGITFL	8.61467	3.10679	0.00065806	0.0021187
YLSMVFSIV	9.62114	3.26621	5.27395e-05	0.000282864
KQASGNIVY	29.6912	4.89196	4.61261e-05	0.000260749
QVFIKPEVF	44.9476	5.49017	3.96779e-06	4.83724e-05
VEFEmRPPL	23.2077	4.53653	0.00014983	0.000647301
MVSLSIWIL	9.0929	3.18474	1.92764e-05	0.000149965

## Sheet: Sheet2
Dataset 2
Volcano plot analysis between WT (condition 1) versus φloop G30L (condition 2)
Peptides	fc(cond1/cond2)	log2 fc(cond1/cond2)	p_value	corrected p_value
MVVDIVQEL	313.989	8.29457	3.15632e-05	0.000369766
AIAPIIAAV	6.78772	2.76293	8.54415e-05	0.000807076
EVAGILEPVGL	19.2878	4.26962	4.86156e-07	1.47749e-05
YMVTIVHIY	6.96743	2.80063	4.84553e-05	0.000521081
AAYGELRAM	0.0162623	-5.94233	7.6521e-05	0.000746346
FAIDPHLLLSV	62.1315	5.95725	5.44682e-05	0.000569256
NVIDNPWGV	4.89187	2.29039	6.98735e-08	3.40755e-06
DIFPIVIHV	11.1832	3.48327	4.56531e-09	6.14561e-07
IAIPFLIKL	14.0669	3.81424	3.35888e-05	0.00038701
FAYGGWNYL	48.9048	5.61191	6.77763e-06	0.000109096
DIFRYQDEV	7.74819	2.95386	6.4981e-08	3.24441e-06
FAAFFSHIL	7.0807	2.82389	0.000182649	0.00147883
FSFDYIVKW	21.4609	4.42364	9.03567e-07	2.59559e-05
YKIAFPYLY	6.60658	2.7239	4.68907e-09	6.14561e-07
FSWEGAFQHV	7.54208	2.91496	5.06615e-09	6.24924e-07
EIMEIMQNL	6.74212	2.7532	5.75237e-07	1.72325e-05
VALNFIISY	34.3311	5.10144	0.000125967	0.00110524
YAYFNFPEL	6.86535	2.77933	1.0492e-06	2.85738e-05
RAYQQSEAY	8.4729	3.08286	0.00108624	0.0064896
FVNDIFERIA	8.90973	3.15538	1.13965e-05	0.000160392
YVTSILQSL	10.0225	3.32517	3.81072e-06	7.46829e-05
LSFPYSYEV	4.57766	2.19461	0.00192413	0.00991376
DIFEFLNHV	5.67246	2.50398	8.08306e-05	0.000777531
KQTQIFTTY	6.03061	2.5923	0.000824101	0.00514327
RQFEFSVDSF	4.78796	2.25941	0.00056358	0.00375183
KNFPWQVFF	10.8896	3.44487	1.08468e-08	1.08313e-06
YVFSKTYNV	0.0484075	-4.36863	0.000117089	0.00104483
DTFSVQVLV	41.3523	5.36989	0.000212375	0.00167425
IVTEIISEI	39.4269	5.30111	8.37334e-06	0.000126323
ETIRNYAQV	19.7588	4.30443	1.14738e-09	2.40606e-07
IQKAVSEGY	4.71764	2.23807	0.000603801	0.00398167
SKLQNNNVY	10.983	3.4572	4.33077e-11	3.70038e-08
YTAEIKQNL	0.0504773	-4.30822	0.00130951	0.00745054
HTFFIKDSL	0.134237	-2.89715	0.000375191	0.00266703
YSFGHPSSV	0.189391	-2.40056	0.00127945	0.00733063
EIFSKNYRV	0.00745813	-7.06697	0.000700956	0.00446779
HTIYPKDSV	5.09194	2.34822	9.90344e-06	0.000144219
mTPEIIQKL	0.0742614	-3.75124	3.49219e-05	0.000399714
EAIDFIDSI	17.0998	4.0959	3.18858e-08	1.98406e-06
NVTWVIVNL	4.5035	2.17105	9.3822e-05	0.000866717
EVFDEKIEV	0.130611	-2.93665	0.000179027	0.00145672
KSFEGLFYF	10.9018	3.4465	3.44914e-06	6.82345e-05
DIATILSKV	5.02766	2.32989	8.0209e-08	3.69386e-06
FVEWIPNNV	11.8982	3.57267	8.20119e-06	0.000124622
TAAQVARVL	0.0858354	-3.54228	0.000691998	0.0044415
TSSKVIQSV	7.41008	2.88949	1.71063e-08	1.32859e-06
ELINIIDGV	10.7904	3.43168	2.22861e-07	8.19896e-06
RTTDIVIRI	0.143543	-2.80044	0.00135761	0.00763249
DVARISWYL	6.54062	2.70943	0.00154887	0.00845829
KSFEAPIKL	0.171484	-2.54385	0.000103909	0.000939212
EIFDKIHSL	0.195256	-2.35656	0.00116892	0.00686616
RTFPWIIEV	5.58712	2.4821	0.000749546	0.00474863
TTFESSHYLL	0.0254894	-5.29396	0.000686885	0.00443199
HGIDPTGTY	5.90884	2.56288	5.77337e-06	0.000101115
EIVQFFSGL	8.39617	3.06973	0.000319091	0.00237842
FSFPGELLm	18.5499	4.21334	5.78629e-06	0.000101115
GKTTQITQY	8.69797	3.12068	8.38853e-10	2.22435e-07
DTFSGQFVL	7.25282	2.85854	0.000124771	0.00110127
FTWEGLYNV	32.4795	5.02146	1.02558e-05	0.000147304
YTFPGILKW	4.48574	2.16534	1.58145e-07	6.52189e-06
YIFEEPFTI	4.05966	2.02136	2.62756e-06	5.62243e-05
ALPEFTSIF	4.33113	2.11474	1.34811e-05	0.000181216
AQRPTEQEL	9.17016	3.19695	2.10641e-10	7.73968e-08
ETSGIGEARV	64.6337	6.01421	6.1218e-07	1.78298e-05
STFEDVTQV	13.2687	3.72995	7.21348e-05	0.000710172
FAFPDEFVF	6.3863	2.67498	1.73425e-06	4.32944e-05
ETYPDAVKI	0.012774	-6.29065	0.000172727	0.00144306
RKFEPGTQRF	4.49379	2.16793	2.22141e-07	8.19896e-06
AQKPFGATY	30.6184	4.93632	3.65676e-09	5.89863e-07
YLGEFSITY	10.1044	3.33692	0.00168351	0.00896019
NFFPGVFEY	6.06531	2.60058	0.00033322	0.00246043
QERPSVTSY	5.00347	2.32293	0.00078479	0.00494206
NTFFSETGA	25.6686	4.68193	0.00191466	0.0099003
TVADVVLWSV	13.7889	3.78543	6.58963e-06	0.000107957
FTAGIVEAVL	25.1757	4.65396	1.50776e-06	3.85582e-05
YSFYLPIAA	11.0195	3.46199	0.000309632	0.00232723
TSYPDPILL	6.89398	2.78534	0.00131104	0.00745054
NVFEGFYGV	4.28124	2.09803	3.30446e-05	0.000382843
YTTDFIFNL	7.06403	2.82049	2.49444e-07	8.71806e-06
NTAETITRV	7.92969	2.98726	2.88218e-09	5.0366e-07
ETIRNIPHL	0.0206669	-5.59653	0.000339027	0.00248581
KSIARVLTV	0.0122523	-6.35081	0.00125683	0.00727551
SIIPPLFTV	4.84168	2.27551	1.30265e-06	3.4578e-05
RAYPDANLL	12.4231	3.63495	8.37083e-09	9.23875e-07
SASKIIVFV	0.222553	-2.16778	0.00150367	0.00825442
KRFEPGTQRF	4.49379	2.16793	2.22141e-07	8.19896e-06
GKAWGILTF	6.64515	2.7323	3.03032e-05	0.000356999
EGAAVFWNV	4.89104	2.29014	4.68906e-06	8.93905e-05
RTYPVEILY	21.3341	4.41509	4.39676e-08	2.3641e-06
MFLADVVDF	18.5499	4.21334	5.78629e-06	0.000101115
NVTSIMFLV	5.62893	2.49286	2.36255e-05	0.000288039
TVFNFPVSI	7.17317	2.84261	2.86629e-05	0.000341512
NAFSGVMML	21.6456	4.436	3.85454e-05	0.000432244
RVFPSPMRI	0.0270071	-5.21052	0.00147368	0.0081796
DVFHmVVEV	16.6616	4.05846	0.00144176	0.00806233
TKISTHVSF	11.0085	3.46055	0.000385407	0.00271207
AQISWVTVF	4.19789	2.06967	0.000136844	0.00119072
ALMPPFTAF	8.54381	3.09488	3.26664e-05	0.000380563
ETSPHTFQL	0.16303	-2.61679	0.000167148	0.00141335
TSVPELQIPL	19.2878	4.26962	4.86156e-07	1.47749e-05
SIHVGQAGV	4.71347	2.23679	0.000240693	0.00186248
EQGIHPLAF	10.7467	3.42582	2.15066e-05	0.00026529
PQRATSNVF	13.2092	3.72347	9.9875e-07	2.79251e-05
TKVYGLmYF	10.9018	3.4465	3.44914e-06	6.82345e-05
IKENPSSQY	4.06852	2.02451	0.00155515	0.00847051
AMASIINRL	0.0286364	-5.12601	0.000178479	0.00145672
NAYDFImKL	0.028156	-5.15041	0.000232191	0.00180335
FASFILRTL	5.71993	2.516	2.70704e-08	1.83118e-06
VKVDLSEKY	0.0351339	-4.83099	0.00172793	0.00906031
MKLLTGLVF	21.0033	4.39254	2.20198e-05	0.000270033
NKYMGLTQF	11.8566	3.56762	6.52679e-06	0.000107957
AKYLDEDTIY	14.3778	3.84577	5.97881e-05	0.000617614
YQSPHSGSF	4.48217	2.1642	0.000534312	0.00359119
FQRGNDVAF	6.86794	2.77988	6.09353e-05	0.000626379
AKWLQDEMF	10.5505	3.39924	2.2145e-10	7.73968e-08
SQYNIRGVTY	5.77365	2.52948	7.08847e-06	0.000111763
IAISRTPVL	0.147928	-2.75704	0.000519172	0.00354627
mTNDKTAKV	0.239463	-2.06212	0.00171002	0.00906031
AAAELIKEV	0.144407	-2.79179	5.1779e-05	0.000545631
KQVKYFIHY	4.51608	2.17507	1.58615e-07	6.52189e-06
FQAPRNPTL	118.287	6.88615	2.94959e-05	0.000349452
ESFSDYPPL	17.7804	4.15221	0.00126132	0.00727551
QQALHTVQY	5.68129	2.50622	0.000189307	0.00152684
SVAVIHQSL	0.063542	-3.97615	0.00134603	0.00760961
MSYAEVMRL	0.200872	-2.31565	0.0015815	0.00859173
IKMDASLGNL	0.0379122	-4.72119	6.43087e-05	0.000651616
FLWAGGRASY	0.0563471	-4.14951	0.000327915	0.00242981
YASSKLLKI	0.0368695	-4.76143	0.000815745	0.00510632
GKLLIGTLY	0.023777	-5.39429	0.000140501	0.00121247
TGYIYPRLY	0.0370004	-4.75631	0.000223496	0.00174227
ASVDKVLEL	0.0325297	-4.9421	9.17625e-05	0.000855227
GKTISLTDF	0.0986969	-3.34085	8.25053e-05	0.000790017
KATNVVRLL	0.236798	-2.07827	0.0019168	0.0099003
GQFLVKSGY	19.6749	4.29829	1.96936e-07	7.6477e-06
GKFTEGNITY	14.1398	3.82168	1.49639e-06	3.85582e-05
GKYFEPEAY	9.07578	3.18202	3.36771e-07	1.07001e-05
FKWSGENSY	10.0662	3.33144	9.54659e-10	2.22435e-07
YKFDFPVSY	4.34145	2.11818	4.84015e-07	1.47749e-05
VKYIQQENF	15.2999	3.93545	2.56028e-06	5.59261e-05
ETNLDSLPL	13.0837	3.70969	5.20811e-08	2.73035e-06
SKYPASSSVF	7.45019	2.89728	4.50218e-09	6.14561e-07
FKFmPPPTY	31.4354	4.97432	2.76351e-06	5.8209e-05
YAYPGVLLI	7.68227	2.94153	9.92569e-05	0.000908916
SKTQVTVQY	4.77359	2.25507	2.26362e-06	5.21628e-05
RQYEQQTY	128.067	7.00075	5.96605e-07	1.76209e-05
AQRYLLQY	4.18328	2.06463	0.0015015	0.00825442
AKFVDGEWY	7.3686	2.88139	9.11962e-09	9.56192e-07
FASEYPLIL	7.92215	2.98589	1.66767e-08	1.32859e-06
AQMAQILSF	5.58858	2.48248	4.22814e-05	0.00046421
FSVDSPRIY	0.10713	-3.22257	0.00166405	0.00887919
EIYSDTQFPS	8.76903	3.13242	6.33244e-06	0.000107957
GQIPQILYY	6.51089	2.70286	7.70796e-09	8.97978e-07
FQKVITEY	6.0334	2.59297	1.45879e-07	6.24301e-06
GKFNVLLTTY	4.28763	2.10018	0.00152101	0.00832781
FAFEEAIGY	6.61618	2.726	3.22666e-06	6.63363e-05
WQKGIGEFF	16.6202	4.05486	8.7886e-11	4.60743e-08
ASAIPTAIDF	0.0200022	-5.6437	0.000353207	0.00257179
RKVADVSQF	4.30206	2.10503	2.39992e-07	8.67694e-06
EAINIIQGI	9.22286	3.20521	1.84402e-05	0.000232946
YSYWTKNGV	4.18437	2.06501	3.15041e-07	1.04785e-05
KSVDWLLVF	10.986	3.45759	1.94278e-07	7.6477e-06
SIWPLIRIY	5.03497	2.33198	6.34923e-08	3.24441e-06
STADFQVGV	10.4754	3.38894	0.00161845	0.0087067
ETAGFQEGV	10.1699	3.34623	6.4944e-05	0.000651616
MAFDPTSTLL	5.56766	2.47707	4.21371e-08	2.3253e-06
FAFPGSTNSL	11.2874	3.49664	3.38991e-11	3.70038e-08
SAFGFPVIL	5.14804	2.36402	0.00101587	0.00617475
FFIAGRYEF	5.54727	2.47178	2.40417e-08	1.73846e-06
SQYPFPVTLY	7.75713	2.95552	3.31149e-08	1.98406e-06
SQARTLITF	9.70619	3.27891	1.50359e-08	1.32859e-06
LRNETNLAY	12.0796	3.5945	4.13204e-08	2.3253e-06
ALNPQNTVF	10.8462	3.43911	5.67842e-06	0.000101115
AmYGGLVLF	8.33507	3.05919	0.000541244	0.00361461
KTIPIDGDF	0.0200022	-5.6437	0.000353207	0.00257179
LmNNHMKLI	9.68649	3.27597	1.62349e-08	1.32859e-06
ISLmFLLSY	4.40223	2.13824	0.00107615	0.00644768
EQYEQILAF	11.0429	3.46505	6.81526e-06	0.000109096
FmVSQVLF	8.33507	3.05919	0.000541244	0.00361461
VKVPTTLAEY	4.86606	2.28275	0.000124989	0.00110127
TVSEVIQGLL	9.69062	3.27659	2.57581e-08	1.80049e-06
SQLVAGVAF	8.96759	3.16472	1.98879e-05	0.000248244
AQVVQWVSF	5.25604	2.39398	0.000203463	0.00162228
VKPRYGLVTY	11.1427	3.47803	7.03267e-06	0.000111724
SQFPQPQHF	4.75946	2.2508	0.00147444	0.0081796
MSFGNVVEL	4.52445	2.17774	3.36701e-07	1.07001e-05
KLLGPGVNY	4.47996	2.16349	2.46511e-07	8.71806e-06
RQIDLVDNYF	5.98637	2.58168	7.31748e-06	0.000113665
YAYATVLTF	4.15894	2.05622	2.11767e-06	4.97912e-05
RQLPAmTAL	6.41415	2.68126	2.29455e-08	1.71845e-06
QSFPEPLII	11.4549	3.5179	1.92427e-06	4.63816e-05
RQALLLLAL	8.8929	3.15265	0.00116051	0.00685305
RSLQENIAY	12.0796	3.5945	4.13204e-08	2.3253e-06
TTFEYPNTI	10.4697	3.38814	1.18616e-05	0.000164726
FVIRNIVEA	8.29625	3.05246	5.5706e-06	0.000100703
mAQSRVLLLL	6.23718	2.64089	1.03154e-06	2.84623e-05
SVHVGQAGV	7.52775	2.91222	1.76433e-06	4.35271e-05
AGHLSTAQY	14.8411	3.89152	5.29382e-11	3.70038e-08
GKRTDEAAF	5.86411	2.55191	2.91688e-07	9.86565e-06
AKVLTPELY	14.9498	3.90205	1.21236e-05	0.000167258
LASASDTELY	8.00488	3.00088	4.71637e-05	0.000512447
STFDHPELV	9.96109	3.3163	4.89497e-05	0.000523712
RGFGFVTY	10.0063	3.32284	2.60825e-06	5.62243e-05
YGYERQRDY	7.33076	2.87396	4.52329e-05	0.000494028
LQAVELQGL	9.22286	3.20521	1.84402e-05	0.000232946
GQNAQTMAY	4.3993	2.13727	0.00172107	0.00906031
LENLFFSAV	8.39617	3.06973	0.000319091	0.00237842
ETNIRVVGGL	4.5035	2.17105	9.3822e-05	0.000866717
FGLSEVTSV	6.39408	2.67674	2.70465e-07	9.2978e-06
ALGRFSQLY	4.18328	2.06463	0.0015015	0.00825442
RMSKRmCVL	0.0177345	-5.8173	0.000113077	0.00101335
KAFGSTIVI	9.84949	3.30005	7.26153e-06	0.000113638
FQAFHSVAF	10.1225	3.33949	9.03745e-10	2.22435e-07
AKNNVVINY	7.45487	2.89818	2.64319e-09	5.0366e-07
mSVDRYLAI	0.10713	-3.22257	0.00166405	0.00887919
SSIFLYIRm	0.0370004	-4.75631	0.000223496	0.00174227
FASPMKSVV	0.0294804	-5.0841	0.000334634	0.0024622
KSFGSAQEF	5.00153	2.32237	1.31538e-07	5.86882e-06
FHSNITSDL	6.34462	2.66553	0.000502917	0.00344646
MGALATYIF	8.03517	3.00633	0.00158949	0.00861281
ETQHIADQV	16.8683	4.07624	7.44959e-08	3.55041e-06
IQATGNTTTSTI	45.1155	5.49555	0.000279474	0.0021234
YTFSKYYF	7.58889	2.92389	1.23462e-05	0.000169215
ATYNEIVTF	6.54135	2.70959	1.59859e-08	1.32859e-06
SQFPGAITL	4.42521	2.14575	0.000996527	0.00609247
YLSMVFSIV	5.49316	2.45764	0.000319845	0.00237842
KQASGNIVY	7.25687	2.85935	1.32061e-05	0.000178665
QVFIKPEVF	10.986	3.45759	1.94278e-07	7.6477e-06
VEFEmRPPL	5.67246	2.50398	8.08306e-05	0.000777531
