# Supplementary material for: TAPBPR mediates peptide dissociation from MHC class I using a leucine lever
Source: eLife. 2018 Nov 28;7:e40126. doi: 10.7554/eLife.40126 (PMC6307860; doi:10.7554/eLife.40126)
Supplement: Figure 5—source data 10. [file elife-40126-fig5-data10.xlsx]

## Sheet: Filteredpeptides
A2	Sequence	# PSMs	# Proteins	# Protein Groups	Protein Group Accessions	Modifications	ΔCn	Area	q-Value	PEP	IonScore	Exp Value	Charge	MH+ [Da]	ΔM [ppm]	RT [min]	# Missed Cleavages	best_Syf_Allele	best_Syf_Score	best_NetMHC_Allele	best_NetMHC_Score	best_NetMHC_Allele_Rank	best_NetMHC_Rank
High	AAYSDGYGRVY	21	1	1	O43251		0	2.75365e+07	0	7.258e-13	83.32	1.46636e-06	2	1221.55	0.510372	46.9142	0		0	B1503	57.2	B1503	1.3
High	AAANAIRVY	8	1	1	Q9NRK6		0	6.76329e+06	0	1.333e-07	75.27	1.02493e-05	2	948.526	-0.204275	38.8047	0	C1203	92.59	B1503	11.3	C1203	0.12
High	FASGLIHRV	71	1	1	Q8N6L1		0	9.63222e+08	0	1.642e-06	72.55	1.38253e-05	2	999.572	-1.64706	39.6484	0	C1203	88.89	A6802	15.6	C1203	0.08
High	TAVALLRLL	15	1	1	Q14165		0	1.19091e+07	0	6.394e-06	70.79	3.589e-06	2	969.645	-0.089645	80.0048	0	C1203	77.78	C1203	109.9	C1203	0.5
High	IGVDFALKV	25	2	2	Q13637;P57729		0	3.1424e+07	0	1.747e-08	70.11	2.10208e-05	2	961.572	-0.113838	70.9196	0	C1203	44.44	C1203	353	C1203	1.3
High	YKIGDLTGY	22	1	1	Q9NVN8		0	1.45952e+08	0	7.014e-10	69.55	3.96142e-05	2	1029.52	-1.27242	59.3105	0	C1203	44.44	B1503	19.3	B1503	0.5
High	SAYGSVKAY	46	2	2	P07355;A6NMY6		0	2.29678e+08	0	1.158e-05	68.35	6.97897e-05	2	945.467	-0.261786	37.0598	0	C1203	88.89	B1503	7.5	C1203	0.01
High	LVANIIQNV	28	1	1	O94915		0	5.23657e+07	0	0.001603	67.66	2.61293e-05	2	983.588	-0.149316	70.6936	0	C1203	44.44	A6802	15.3	A6802	0.15
High	KLFGSTSSF	30	1	1	P08174		0	1.11398e+08	0	4.501e-05	67.36	9.39022e-05	2	973.499	-0.38885	50.6893	0	C1203	37.04	B1503	2.9	B1503	0.01
High	YGYDNVKEY	15	1	1	Q96GN5		0	2.14318e+07	0	3.145e-13	67.15	4.02371e-05	2	1150.51	-0.0771995	44.4398	0	C1203	59.26	C1203	8.5	C1203	0.01
High	SIAQIIVTV	44	1	1	Q9UNQ0		0	7.17127e+07	0	0.001653	66.8	3.70223e-05	2	943.582	-0.49449	81.3895	0	C1203	51.85	A6802	23.4	A6802	0.25
High	MVVDIVQEL	62	1	1	O00764		0	8.7888e+08	0	5.511e-09	66.44	8.75373e-05	2	1045.56	-0.359099	85.9687	0	C1203	48.15	A6802	12.4	C1203	0.06
High	AKFDGILGM	24	1	1	P07339		0	2.19716e+07	0	4.639e-05	66.26	8.64389e-05	2	951.497	-0.0720597	66.3515	0	C1203	48.15	B1503	19.2	B1503	0.5
High	NTVDFFNQI	121	2	2	Q9H8S9;Q7L9L4		0	1.32889e+09	0	2.769e-07	65.82	9.78939e-05	2	1097.53	-0.620492	83.3742	0	C1203	62.96	A6802	3.5	A6802	0.01
High	FVFPGELLL	56	1	1	Q15758		0	1.69608e+08	0	5.542e-09	65.46	7.28893e-05	2	1034.59	-0.650534	105.589	0	C1203	55.56	C1203	10.8	C1203	0.03
High	ETADVIAKVAF	19	1	1	O43617		0	1.43466e+07	0	4.361e-10	65.23	0.00010758	2	1163.63	-0.268648	65.5117	0		0	A6802	436	A6802	2
High	IAAVIARFY	2	1	1	P40305		0	9.11033e+06	0	1.035e-07	65.18	4.82085e-05	2	1023.6	-0.419276	67.5336	0	C1203	81.48	B1503	76.7	C1203	0.4
High	IIVDIFHGL	3	1	1	Q9Y4E8		0	4.88434e+06	0	1.039e-06	64.86	7.3123e-05	2	1026.6	0.260122	83.3882	0	C1203	40.74	A6802	63.7	A6802	0.6
High	DVSIINITV	14	1	1	Q96BP3		0	7.579e+06	0	5.669e-07	64.66	0.000111981	2	973.556	-0.100921	92.9696	0	C1203	48.15	A6802	15.9	A6802	0.15
High	AKAPPPVFY	34	1	1	Q16643		0	2.76704e+07	0	4.398e-08	64.57	0.00014196	2	989.545	-0.619337	46.9836	0	C1203	59.26	B1503	18.2	B1503	0.5
High	AKVKFEERY	21	1	1	P61353		0	1.16874e+07	0	1.639e-11	64.42	0.000115109	2	1169.63	-0.509902	26.1052	0	C1203	40.74	B1503	162.6	B1503	2.5
High	YMVTIVHIY	13	1	1	P50851		0	1.44843e+07	0	5.578e-14	64.14	0.000146964	2	1138.6	-0.167069	72.0834	0	C1203	44.44	B1503	7.7	B1503	0.15
High	IAFPSANEV	18	1	1	Q9NXH9		0	1.40519e+07	0	6.906e-06	64.08	0.00025987	2	947.483	-0.254859	65.2654	0	C1203	88.89	C1203	10.6	C1203	0.03
High	AAFLKAIGY	36	1	1	O75533		0	9.70275e+07	0	0.0004863	63.58	0.000101893	2	953.545	-0.258667	64.2995	0	C1203	85.19	B1503	29.1	B1503	0.7
High	SAAEEVKTY	16	1	1	Q5JRA6		0	9.48543e+06	0	3.113e-05	63.58	0.000114171	2	997.483	-0.684232	29.0412	0	C1203	92.59	B1503	74	C1203	0.4
High	DASPVTNNTI	28	1	1	O15164		0	5.47832e+07	0	7.678e-05	63.51	0.00016311	2	1031.5	0.111081	48.524	0	C1203	45.71	A6802	308.3	A6802	1.6
High	AQNPANMSKY	20	2	2	P50502;Q8NFI4		0	1.53182e+07	0	1.874e-06	63.23	0.000128174	2	1123.52	-0.908514	31.0967	0	C1203	34.29	B1503	7.9	B1503	0.15
High	AKAPPTACY	100	1	1	P17676		0	1.34346e+08	0	4.441e-06	63	0.000254277	2	921.45	-0.424126	30.2589	0	C1203	51.85	B1503	9.8	B1503	0.2
High	ETSSLFQISV	12	1	1	Q6TFL4		0	4.5923e+06	0	0.0002225	62.83	0.000173897	2	1110.57	-0.30695	84.458	0	C1203	42.86	A6802	6.1	A6802	0.03
High	LAVPFCVNF	53	1	1	Q9Y266		0	3.67729e+07	0	1.358e-05	62.78	0.000233088	2	1009.52	-0.096726	99.8226	0	C1203	77.78	B1503	27	B1503	0.7
High	MAVEFLHEL	14	1	1	Q9NR45		0	7232941	0	3.128e-05	62.77	0.000249505	2	1088.54	-0.512968	74.1208	0	C1203	81.48	C1203	10.3	C1203	0.03
High	DIANFQVLV	13	1	1	Q8IY34		0	1.82812e+07	0	0.0001278	62.61	0.000282911	2	1018.56	-0.0707286	93.2541	0	C1203	44.44	A6802	10.8	A6802	0.08
High	DTAEIIKTL	33	1	1	P82909		0	7.00486e+07	0	0.001462	62.27	0.000129465	2	1003.57	-0.53451	62.0718	0	C1203	85.19	A6802	32.9	A6802	0.3
High	GQYGNPLNKY	49	1	1	O14672		0	5.15495e+08	0	5.997e-12	62.14	0.000215754	2	1153.56	-0.233372	44.0352	0	C1203	34.29	B1503	14.8	B1503	0.4
High	AKLPFTPLSY	13	1	1	Q9UM00		0	2.25572e+07	0	0.00038	61.93	0.000180917	2	1136.63	-0.433048	70.3483	0	C1203	48.57	B1503	14.2	B1503	0.4
High	TLIEDILGV	24	1	1	Q8TEL6		0	1.88086e+07	0	0.001186	61.82	0.00019345	2	972.561	-0.163018	102.997	0	C1203	48.15	A6802	119	A6802	0.9
High	AIAPIIAAV	30	1	1	Q9BQ52		0	25431668	0	0.00137	61.72	3.28413e-05	2	838.54	-0.0738007	76.1583	0	C1203	55.56	A6802	14.5	A6802	0.12
High	SQFGGGSQY	40	1	1	O15371		0	1.84919e+08	0	0.001156	61.46	9.04195e-05	2	930.394	-1.13898	42.372	0	C1203	44.44	B1503	2.6	B1503	0.01
High	YKAAAGEDY	26	1	1	P23381		0	5.16477e+07	0	1.573e-07	61.4	0.000183174	2	987.442	-0.0113833	28.4717	0	C1203	44.44	B1503	35.3	B1503	0.9
High	IAIPFLIKL	30	1	1	Q8N2K0		0	2.5229e+07	0	1.372e-08	61.32	1.23968e-05	2	1027.69	-0.254543	92.0869	0	C1203	85.19	C1203	73.5	C1203	0.4
High	IATSQNRIY	12	1	1	Q99623		0	1.84519e+07	0	1.852e-05	61.12	0.000266459	2	1065.57	-0.790759	33.3564	0	C1203	81.48	B1503	96.5	C1203	1.5
High	AKWNPTAGVAF	28	1	1	P19387		0	5.73662e+07	0	1.787e-12	61.09	0.000334245	2	1161.61	-0.0268268	63.316	0		0	B1503	59.9	B1503	1.3
High	MTALVNVAL	16	2	2	Q8WVM7;Q8N3U4		0	39142437	0	2.384e-06	60.96	0.000305119	2	931.528	-0.247588	78.6367	0	C1203	74.07	A6802	4.6	A6802	0.01
High	SGFSGVIRL	30	1	1	P11309		0	5.43425e+07	0	1.496e-08	60.83	0.000238105	2	935.531	-0.141078	61.6342	0	C1203	51.85	C1203	196.7	C1203	0.8
High	RLYGPSSVSF	19	1	1	P50454		0	4.65346e+07	0	6.136e-11	60.37	0.000352548	2	1112.57	-0.976122	55.6322	0	C1203	42.86	B1503	5.4	B1503	0.06
High	FAIDPHLLLSV	39	1	1	Q29RF7		0	1.26884e+08	0	1.341e-13	59.99	0.000185677	2	1224.7	0.129695	93.0364	0		0	C1203	270.7	C1203	1.1
High	EVYGSLPAFL	51	1	1	Q01650		0	6.78138e+08	0	0.0005816	59.97	0.000358669	2	1095.57	-0.168211	92.2249	0	C1203	40	A6802	19	A6802	0.17
High	MASALVHIL	28	1	1	Q5VWQ8		0	4.19502e+07	0	0.001584	59.92	0.000199695	2	954.544	-0.421698	64.0634	0	C1203	81.48	C1203	22.8	C1203	0.09
High	MAAAWPLLL	27	1	1	P15151		0	6.35881e+07	0	0.0001537	59.89	0.000314824	2	985.554	-0.494042	103.644	0	C1203	85.19	C1203	7.1	C1203	0.01
High	ALIEFIRSEY	38	1	1	P26639		0	2.10531e+08	0	2.057e-13	59.84	0.000356235	2	1240.66	0.20715	73.0259	0	C1203	31.43	B1503	60.8	B1503	1.3
High	SSAPTARVF	31	1	1	O94906		0	5.95918e+07	0	0.0001243	59.82	0.000410986	2	935.494	-0.779575	37.5063	0	C1203	77.78	B1503	17.5	C1203	0.17
High	TAFPFQVEV	29	1	1	A6NHR9		0	3.8878e+07	0	1.105e-05	59.61	0.000527342	2	1037.53	-0.0697175	89.2017	0	C1203	92.59	A6802	9.9	C1203	0.05
High	KKFFGEFTGF	29	1	1	Q15029		0	6.42257e+07	0	1.954e-10	59.52	0.000415808	2	1207.61	-0.412349	62.4818	0	C1203	42.86	B1503	16.3	B1503	0.4
High	SKFPTQISL	7	1	1	O15164		0	1.96463e+07	0	4.509e-05	59.18	0.000390426	2	1020.57	-0.802945	58.6311	0	C1203	51.85	B1503	28.7	B1503	0.7
High	SAVNIIRTF	11	1	1	P29728		0	9.74732e+06	0	0.001547	59.18	0.000276529	2	1020.58	-1.23091	61.44	0	C1203	77.78	B1503	18.8	C1203	0.1
High	GKWPSSQQY	11	1	1	Q8TD26		0	7.17093e+06	0	0.0001697	59.1	0.000406296	2	1080.51	-0.903283	36.8883	0	C1203	44.44	B1503	17.8	B1503	0.5
High	YCSNLVRTL	1	1	1	Q9Y5B9		0	1.29211e+07	0	0.001724	58.97	0.000374274	2	1068.55	-0.537994	54.2264	0	C1203	55.56	C1203	264.9	C1203	1.1
High	SSSGIVYKV	26	1	1	Q9P2E3		0	4.64336e+07	0	0.000268	58.75	0.000316511	2	939.514	-0.548811	38.9832	0	C1203	77.78	A6802	12.5	A6802	0.1
High	SQIRQSTAY	14	1	1	O43150		0	6.87738e+06	0	1.072e-05	58.73	0.000491326	2	1053.53	-0.903277	28.6707	0	C1203	37.04	B1503	3.2	B1503	0.02
High	DVNAIIHYL	16	1	1	P09914		0	9.7122e+06	0	0.001582	58.52	0.000592227	2	1057.57	-0.371569	80.415	0	C1203	40.74	A6802	13.7	A6802	0.12
High	KLFLTGESY	9	1	1	P10619		0	1.13925e+07	0	2.776e-09	58.05	0.000552515	2	1057.56	-0.487443	55.2105	0	C1203	40.74	B1503	6.4	B1503	0.09
High	SQYPFPVTL	43	1	1	Q5R372		0	7.40176e+07	0	6.139e-05	57.93	0.000728737	2	1051.55	-0.53789	85.036	0	C1203	59.26	B1503	4.8	B1503	0.05
High	NAANIFERL	25	2	2	Q9Y6D6;Q9Y6D5		0	4.81595e+07	0	2.7e-07	57.91	0.000673283	2	1047.56	-0.880835	61.4745	0	C1203	77.78	A6802	36.5	A6802	0.4
High	YSIDLSERV	19	1	1	Q6NTF9		0	3.15105e+07	0	3.687e-06	57.88	0.000529277	2	1081.55	-1.04865	59.3464	0	C1203	74.07	A6802	19.6	A6802	0.17
High	AKYPHVEDY	41	1	1	P61289		0	4.4219e+07	0	7.496e-09	57.65	0.000595942	2	1121.53	-0.807067	36.6251	0	C1203	55.56	B1503	8.3	B1503	0.15
High	NAYDFIMKL	29	1	1	P08183		0	1.16339e+08	0	2.248e-07	57.55	0.000640763	2	1114.56	-0.295406	81.1029	0	C1203	85.19	C1203	13.6	C1203	0.04
High	DVADVLLQA	16	2	2	Q8IWZ3;O75179		0	5.96528e+06	0	0.001429	57.35	0.000667556	2	943.509	-0.294001	84.854	0	C1203	11.11	A6802	22.8	A6802	0.25
High	AQGPTPRYF	86	1	1	O60427		0	1.35617e+09	0	0.0008089	57.32	0.000689884	2	1036.52	-1.45916	42.4165	0	C1203	48.15	B1503	8.2	B1503	0.15
High	GKIGTVMTF	15	1	1	P30046		0	2.76788e+07	0	8.166e-05	57.13	0.000581217	2	953.513	0.104394	53.8564	0	C1203	40.74	B1503	6	B1503	0.08
High	IALPSLRIL	34	1	1	P00403		0	5.3847e+07	0	0.001159	56.85	3.6867e-05	2	995.66	-0.848026	79.215	0	C1203	85.19	C1203	139.2	C1203	0.7
High	VAAPQVQQV	23	1	1	Q12772		0	3.0994e+07	0	0.0008476	56.82	0.000552159	2	939.525	-0.569592	45.698	0	C1203	92.59	C1203	74	C1203	0.4
High	AKVANASYY	9	1	1	O15042		0	7.38269e+06	0	2.592e-05	56.62	0.000884586	2	986.494	-0.188731	30.4601	0	C1203	40.74	B1503	13.4	B1503	0.3
High	AQEDAQRLY	5	1	1	P20073		0	4.2195e+06	0	1.103e-06	56.32	0.000857896	2	1093.53	-0.140913	36.8747	0	C1203	48.15	B1503	24.7	B1503	0.6
High	FTADFVRQL	32	1	1	Q96Q15		0	5.44305e+07	0	1.446e-07	56.27	0.000851188	2	1096.58	-0.186544	65.837	0	C1203	85.19	C1203	7.7	C1203	0.01
High	SSYDKPITF	16	1	1	Q86X10		0	22197973	0	2.682e-07	56.04	0.000921251	2	1057.52	0.794615	50.8751	0	C1203	77.78	C1203	10.8	C1203	0.03
High	VTYNYPVHY	12	1	1	Q9NV96		0	1.8023e+07	0	0.0001528	55.92	0.000710136	2	1155.55	-0.535723	51.766	0	C1203	81.48	B1503	24.7	C1203	0.12
High	YLADIFTKL	33	1	1	Q49AG3		0	5.93146e+07	0	6.648e-11	55.75	0.000591745	2	1083.61	-0.510835	79.9664	0	C1203	48.15	C1203	22.6	C1203	0.09
High	YCAEIAHNV	85	1	1	P62910		0	3.12694e+08	0	1.733e-08	55.71	0.000757938	2	1019.46	-0.765446	40.4933	0	C1203	48.15	A6802	42.5	A6802	0.4
High	EVYPFGIVGM	37	1	1	O75534		0	3.74067e+07	0	1.269e-06	55.62	0.00103549	2	1111.55	-0.0534077	95.2547	0	C1203	28.57	A6802	35.5	A6802	0.4
High	GKPPFEANTY	26	1	1	O14965		0	5.88077e+07	0	1.935e-05	55.57	0.00113734	2	1123.54	-0.519728	42.0081	0	C1203	31.43	B1503	372	B1503	4.5
High	DVIDIMENL	12	1	1	P41279		0	2.47874e+06	0	0.0001052	55.55	0.000976675	2	1061.52	-0.155649	103.1	0	C1203	40.74	A6802	18.9	A6802	0.17
High	IKISEGTGF	3	1	1	Q9Y2R4		0	5.77016e+06	0	0.0002954	55.54	0.000877278	2	951.514	-0.242182	50.1048	0	C1203	33.33	B1503	7.2	B1503	0.12
High	TVIAKVNNV	23	1	1	P26639		0	2.98992e+07	0	0.0002461	55.53	0.00085187	2	957.572	-0.318483	34.5697	0	C1203	40.74	A6802	11.7	A6802	0.09
High	FISEIIHQL	13	1	1	Q9C040		0	2.24133e+07	0	2.311e-07	55.5	0.000976429	2	1099.62	0.342423	72.9803	0	C1203	51.85	A6802	10	C1203	0.06
High	AAYGELRAM	13	1	1	Q9UL46		0	1.2856e+07	0	1.643e-05	55.16	0.000926865	2	981.482	-0.0570228	44.7932	0	C1203	81.48	C1203	15.4	C1203	0.05
High	YAIDNPLHY	20	1	1	A5YKK6		0	3.09131e+07	0	2.383e-12	55.01	0.00118407	2	1105.53	-0.555437	60.6119	0	C1203	88.89	C1203	10.7	C1203	0.03
High	ILGPPGSVY	34	3	3	P51965;Q96LR5;Q969T4		0	6.2672e+07	0	9.235e-05	54.94	0.00207317	2	902.498	-0.0839792	65.8937	0	C1203	48.15	B1503	14.6	B1503	0.4
High	FAFSGVLRA	28	1	1	Q92766		0	1.00609e+08	0	3.758e-05	54.73	0.000888391	2	967.536	0.0279482	64.2937	0	C1203	55.56	C1203	14.8	C1203	0.05
High	FAYGGWNYL	36	1	1	Q01650		0	9.5319e+07	0	2.773e-07	54.45	0.000999598	2	1090.5	-0.192814	89.2435	0	C1203	85.19	C1203	2.8	C1203	0.01
High	AAYGYGIRY	26	3	3	P11216;P06737;P11217		0	9.69492e+07	0	4.887e-05	54.35	0.00151118	2	1033.51	-0.464579	49.54	0	C1203	88.89	B1503	8.9	C1203	0.15
High	TKVGPNATY	17	1	1	Q9Y5V3		0	1.09946e+07	0	0.001115	54.22	0.00178474	2	950.494	-0.463256	28.7537	0	C1203	44.44	B1503	16.5	B1503	0.4
High	MVAPVWYLV	36	1	1	Q96HY6		0	4.09704e+07	0	9.274e-05	54.21	0.00130977	2	1077.58	-0.409981	102.711	0	C1203	48.15	A6802	2	A6802	0.01
High	HAIDRVTTSV	14	1	1	Q9BTT6		0	1.22092e+07	0	1.036e-06	53.88	0.00130616	2	1098.59	-0.540777	33.8797	0	C1203	60	A6802	17.3	A6802	0.15
High	GQYPTQPTY	47	1	1	Q15038		0	8.59875e+08	0	0.0001104	53.79	0.00151067	2	1054.48	-0.536057	47.2883	0	C1203	51.85	B1503	3.1	B1503	0.01
High	YMIDPSGVSY	10	1	1	P25788		0	8.84743e+07	0	0.001059	53.68	0.000855811	2	1131.5	-0.0974144	72.7384	0	C1203	48.57	B1503	5	B1503	0.05
High	YQADIERMY	32	1	1	O95573		0	1.12719e+08	0	2.087e-08	53.66	0.000986982	2	1188.54	-0.285664	54.4676	0	C1203	51.85	B1503	5.3	B1503	0.06
High	AGYQHIRMY	19	1	1	Q9BVC4		0	1.22076e+07	0	0.0003697	53.65	0.00157246	2	1138.55	-0.160901	36.1949	0	C1203	51.85	B1503	27.6	C1203	0.5
High	DIFPIVIHV	30	1	1	Q9BXL6		0	3.85394e+07	0	0.001728	53.64	0.000739599	2	1052.61	-0.349901	89.7449	0	C1203	55.56	A6802	12.2	A6802	0.1
High	TLADVLYHV	34	1	1	Q9UBL3		0	5.71175e+07	0	0.001136	53.56	0.00242746	2	1030.56	-0.701978	70.6902	0	C1203	44.44	A6802	5.7	A6802	0.03
High	VALNFIISY	23	2	2	P50616;Q14106		0	3.6177e+07	0	0.0006935	53.26	0.00117166	2	1039.58	-0.321785	93.0717	0	C1203	85.19	B1503	13.7	C1203	0.3
High	LTFAGVKMY	1	1	1	P58511		0	4.14535e+06	0	4.523e-07	53.25	0.00184908	2	1029.54	0.1764	69.5614	0	C1203	77.78	C1203	32	C1203	0.15
High	NVAEIVIHI	50	1	1	Q9BZD4		0	1.70777e+08	0	0.00123	53.21	0.000679285	2	1007.59	-1.17554	69.0199	0	C1203	44.44	A6802	5.1	A6802	0.02
High	SKLQNNNVY	18	1	1	P63010		0	9.9732e+06	0	9.333e-05	53.16	0.00189142	2	1079.55	-0.791592	27.4904	0	C1203	40.74	B1503	16.3	B1503	0.4
High	ETFKDFPQm	77	2	2	P15170;Q8IYD1	M9(Oxidation)	0	4.82396e+07	0	4.646e-08	53.06	0.00105115	2	1158.51	-0.674415	52.1279	0	C1203	62.96	A6802	240.4	A6802	1.4
High	TVAQIKATV	38	1	1	Q8IXM2		0	3.78828e+07	0	0.00156	53.04	0.000869037	2	930.561	-1.0108	36.9511	0	C1203	44.44	A6802	10.7	A6802	0.08
High	YVSEILEKV	15	1	1	P42704		0	2.62127e+07	0	2.421e-06	52.7	0.00142394	2	1079.6	-1.1558	59.4315	0	C1203	48.15	A6802	6.8	A6802	0.04
High	DVAQIFNNIL	10	1	1	Q9Y376		0	2.16447e+06	0	4.768e-05	52.69	0.00252126	2	1146.62	-0.104068	105.172	0	C1203	28.57	A6802	192.7	A6802	1.2
High	SVSPVVRVAV	112	1	1	P13639		0	2.49654e+09	0	0.001402	52.55	0.000836914	2	1012.61	-0.214897	50.1491	0	C1203	25.71	A6802	26.4	A6802	0.25
High	SAMPTVRSF	52	1	1	Q03518		0	2.21946e+08	0	0.0002041	52.53	0.00171031	2	995.497	-0.571823	48.2542	0	C1203	81.48	B1503	6	C1203	0.02
High	AVANIVNSV	8	1	1	Q9BRQ8		0	1.3783e+07	0	0.001398	52.43	0.00253879	2	886.499	-0.122046	56.4345	0	C1203	48.15	A6802	16.4	A6802	0.15
High	EIVQFFQGL	22	1	1	P31942		0	8.76339e+06	0	8.461e-06	52.12	0.00259345	2	1080.57	-0.146289	94.8375	0	C1203	37.04	A6802	32.6	A6802	0.3
High	DTAEIFHSA	42	1	1	Q92538		0	1.11438e+08	0	0.0007357	51.61	0.00250281	2	990.453	-0.119155	46.5258	0	C1203	37.04	A6802	3.4	A6802	0.01
High	DQAEIRSLV	17	2	2	P09913;O14879		0	6.33117e+07	0	0.0005538	51.5	0.00343354	2	1030.55	-0.966365	55.7247	0	C1203	44.44	A6802	234.1	A6802	1.4
High	SKKIDRHMY	23	1	1	P84098		0	1.19308e+07	0	2.104e-08	51.43	0.00270909	2	1177.61	-0.422854	19.1988	0	C1203	37.04	B1503	311.3	B1503	4
High	NVVDVFHAV	17	1	1	Q15262		0	9.31082e+07	0	0.001447	51.16	0.0028151	2	999.526	0.319497	63.5642	0	C1203	40.74	A6802	2.5	A6802	0.01
High	FKFMPPPTY	62	1	1	Q9H3M7		0	1.20082e+08	0	8.475e-07	51.07	0.00258172	2	1127.56	-0.402409	66.3031	0	C1203	51.85	B1503	3.4	B1503	0.02
High	LANGEVRIY	4	1	1	Q8NFJ9		0	1.12378e+07	0	5.794e-08	50.98	0.00311058	2	1034.56	-0.0459037	45.8324	0	C1203	85.19	B1503	69.1	C1203	0.7
High	YAYDGKDYIAL	41	16	16	P01892;P30447;P05534;P10316;P01889;P30460;Q04826;P30479;P30480;P30486;P18464;P30490;P30498;Q31610;P30499;P04222		0	2.18885e+08	0	1.026e-08	50.81	0.00317376	2	1291.62	-0.181511	66.7214	0		0	C1203	280.6	C1203	1.1
High	KLFIGGLSF	23	4	4	Q32P51;P09651;P22626;P51991		0	24826524	0	0.0008304	50.7	0.00136948	2	981.576	-0.809852	78.9914	0	C1203	37.04	B1503	3.8	B1503	0.03
High	LILPGYIDF	53	1	1	P12268		0	4.41697e+07	0	2.48e-07	50.7	0.00220487	2	1050.59	-0.4339	99.5429	0	C1203	40.74	B1503	74.7	B1503	1.5
High	KSKDFVQVM	34	1	1	P78527		0	5.68437e+07	0	0.0001511	50.62	0.00281806	2	1081.57	-0.459573	39.4522	0	C1203	70.37	B1503	67.8	C1203	0.4
High	SMGPVRVAF	21	1	1	P29279		0	3.23257e+07	0	0.001627	50.55	0.00243434	2	963.509	0.562793	55.9198	0	C1203	40.74	B1503	8	B1503	0.15
High	GKLGFLASY	6	1	1	Q12772		0	1.68599e+07	0	0.001151	50.54	0.00313626	2	955.525	-0.0790122	60.7437	0	C1203	40.74	B1503	11.9	B1503	0.3
High	DTFSGIGKKFGL	23	1	1	Q15847		0	3.05272e+07	0	0.000392	50.45	0.00281471	2	1269.68	0.234964	67.5142	0		0	A6802	198.2	A6802	1.2
High	ELFPIQMEGV	25	1	1	O96008		0	1.83261e+07	0	4.316e-05	50.41	0.0039472	2	1162.58	-0.100589	90.6166	0	C1203	34.29	A6802	20.6	A6802	0.2
High	EISSILQEL	47	2	2	Q96L14;Q5SW79		0	1.14793e+08	0	0.001149	50.24	0.00366336	2	1031.56	-0.0233169	88.7305	0	C1203	48.15	A6802	41.7	A6802	0.4
High	YKLLGGLAV	40	1	1	P23396		0	1.76757e+08	0	0.001584	50.17	0.000860162	2	933.577	-0.121624	66.5538	0	C1203	44.44	B1503	53.1	B1503	1.2
High	KQIFETIYY	25	1	1	P23921		0	4.22494e+07	0	3.023e-07	50.15	0.004126	2	1204.62	-0.157653	64.9882	0	C1203	40.74	B1503	4.2	B1503	0.04
High	GQAPPGKAL	37	1	1	A8MPP1		0	1.7305e+07	0	0.0008202	50.12	0.00247078	2	838.478	-0.0540531	24.4954	0	C1203	51.85	B1503	25.1	B1503	0.7
High	FVNDIFERI	267	14	14	P33778;P62807;P58876;Q93079;P06899;O60814;Q99880;Q99879;Q99877;P23527;Q16778;Q5QNW6;Q8N257;P57053		0	5.21932e+09	0	0.001356	50.07	0.00394539	2	1152.6	-1.21477	73.827	0	C1203	37.04	A6802	12	A6802	0.1
High	KGSSAVRVY	19	1	1	P10914		0	2.11296e+07	0	0.00151	50.06	0.00289966	2	966.536	-0.454011	22.3752	0	C1203	55.56	B1503	38.4	B1503	0.9
High	MSSSVVVRL	22	1	1	A0JNW5		0	4.54972e+07	0	0.0007411	50.01	0.00383516	2	977.545	0.215074	50.2955	0	C1203	81.48	A6802	26	C1203	0.17
High	SAVDFIRTL	35	1	1	Q9UEE5		0	2.72843e+08	0	0.0001017	49.99	0.00319886	2	1021.57	-0.404241	71.187	0	C1203	88.89	C1203	13.9	C1203	0.04
High	IAFPTSISV	41	1	1	Q9UQ80		0	2.63975e+08	0	0.000244	49.92	0.0033313	2	934.524	-0.446093	82.5999	0	C1203	88.89	C1203	10.8	C1203	0.03
High	ETVTATATSQV	25	1	1	Q9H4A3		0	46829183	0	0.0009455	49.86	0.00429009	2	1107.55	-0.0625941	42.9845	0		0	A6802	40.9	A6802	0.4
High	FVEWIPNNV	22	8	8	Q9H4B7;Q13885;Q9BVA1;Q13509;P04350;P68371;P07437;Q9BUF5		0	3.54326e+07	0	0.0007851	49.83	0.00426731	2	1117.57	-0.260287	82.3792	0	C1203	44.44	A6802	43.9	A6802	0.4
High	VGVDFALKV	5	1	1	O14966		0	2.9445e+07	0	0.001432	49.82	0.00271576	2	947.556	-0.153551	69.4125	0	C1203	48.15	C1203	506	C1203	1.7
High	FAISILQQI	83	1	1	P60842		0	8.53742e+07	0	0.000972	49.81	0.00225085	2	1032.61	-0.274251	96.0212	0	C1203	74.07	C1203	8.3	C1203	0.01
High	TTVEIFNKL	104	1	1	Q96QK1		0	1.57963e+09	0	0.001706	49.72	0.00233585	2	1064.6	-0.918141	62.3766	0	C1203	70.37	A6802	8.9	A6802	0.06
High	YAYLYIRML	2	1	1	O75643		0	9.95665e+06	0	2.311e-08	49.72	0.00459863	2	1205.64	0.0748517	80.8164	0	C1203	88.89	C1203	11.7	C1203	0.03
High	YQSDPSGNY	12	1	1	P25789		0	8.54277e+06	0	0.0006015	49.7	0.000795067	2	1030.41	-0.177559	35.4581	0	C1203	48.15	B1503	5	B1503	0.05
High	KASGTLREY	32	1	1	Q02543		0	1.23068e+08	0	0.001277	49.68	0.00351735	2	1024.54	-0.772897	21.8948	0	C1203	88.89	B1503	39.8	C1203	0.8
High	YAFPKAVSVF	32	1	1	O15427		0	1.28534e+08	0	5.873e-08	49.45	0.00422848	2	1128.61	0.506197	71.2724	0	C1203	77.14	B1503	5.9	C1203	0.04
High	ETIPSEIQVFV	40	1	1	Q15646		0	1.88351e+08	0	3.636e-09	49.37	0.00533777	2	1261.67	-0.365797	89.9165	0		0	A6802	12.4	A6802	0.1
High	TTYEGIFKTL	33	1	1	Q8WWM7		0	8.6965e+07	0	1.209e-08	49.29	0.00520207	2	1172.62	-0.939229	67.9251	0	C1203	54.29	A6802	55.7	A6802	0.5
High	NTTDIFQTV	103	1	1	P37802		0	3.88616e+09	0	0.001711	49.13	0.00448156	2	1038.51	-0.774463	71.3058	0	C1203	74.07	A6802	4	A6802	0.01
High	EVAELFQRL	37	1	1	Q4V328		0	1.98555e+08	0	0.001376	49.09	0.00479739	2	1104.6	-0.05194	70.321	0	C1203	44.44	A6802	15.7	A6802	0.15
High	TLFGSVIRY	7	1	1	P09871		0	9.88907e+06	0	0.0004358	49.07	0.00364268	2	1055.59	-0.0140159	67.7613	0	C1203	51.85	B1503	36.9	B1503	0.9
High	GKVGGLLAF	31	1	1	P28340		0	4.5366e+07	0	0.001346	48.9	0.0024728	2	861.519	-0.126129	61.4132	0	C1203	37.04	B1503	8.7	B1503	0.17
High	EVLDFITHL	49	1	1	Q13057		0	2.19114e+08	0	0.0006543	48.7	0.00577491	2	1086.58	-0.539527	85.9528	0	C1203	44.44	A6802	17.7	A6802	0.17
High	SVYEGGVFFL	31	3	3	P51965;Q96LR5;Q969T4		0	6.85766e+07	0	0.0007438	48.53	0.00560354	2	1117.56	-0.470221	96.7633	0	C1203	37.14	A6802	57.9	A6802	0.5
High	SSYLFIVKY	22	1	1	Q96QD8		0	4.74422e+07	0	1.19e-08	48.42	0.00526456	2	1119.61	-0.0404282	71.6692	0	C1203	77.78	B1503	81	C1203	1
High	FAYPAIRYL	73	1	1	P51398		0	3.29857e+08	0	0.0003975	48.39	0.00338143	2	1113.61	-0.212806	73.6853	0	C1203	96.3	C1203	2.4	C1203	0.01
High	TLADIIIGI	22	1	1	Q9NP58		0	2.25224e+07	0	0.001609	48.37	0.0024066	2	928.571	-0.540492	100.564	0	C1203	44.44	A6802	16.1	A6802	0.15
High	RLYFSQQTY	25	1	1	P33897		0	4.42359e+07	0	4.588e-07	48.29	0.00609686	2	1205.59	-0.560238	50.2252	0	C1203	44.44	B1503	3.9	B1503	0.03
High	VQFGANKSQY	9	1	1	Q7Z7E8		0	6.74952e+06	0	3.231e-06	48.28	0.00522158	2	1141.56	-0.45845	35.8077	0	C1203	40	B1503	6.1	B1503	0.08
High	SSVPGVRLL	14	1	1	P08670		0	1.72548e+07	0	1.487e-05	48.18	0.00315362	2	927.562	-0.064591	55.2506	0	C1203	81.48	C1203	48.5	C1203	0.25
High	IQKAVSEGY	9	1	1	P32320		0	6.26747e+06	0	0.001201	48.04	0.00568864	2	994.52	-0.785722	29.0068	0	C1203	37.04	B1503	9.4	B1503	0.17
High	VKTGTITTF	46	1	1	P13639		0	2.61755e+08	0	0.0005665	47.91	0.0028284	2	967.545	-0.531841	42.2567	0	C1203	44.44	B1503	6.1	B1503	0.08
High	FAAFFSHIL	18	1	1	Q86XA9		0	1.89037e+07	0	0.0003857	47.76	0.00441264	2	1052.56	-0.32628	81.5154	0	C1203	81.48	C1203	10.1	C1203	0.03
High	KKHSQFIGY	40	4	4	Q58FF7;Q58FG0;P07900;P08238		0	59825605	0	3.36e-05	47.72	0.00538321	2	1107.59	-0.817783	25.6635	0	C1203	44.44	B1503	11.3	B1503	0.25
High	FGFPGERTY	45	1	1	Q9Y4K0		0	3.38098e+08	0	6.642e-08	47.66	0.00468682	2	1073.5	-1.0782	57.468	0	C1203	59.26	B1503	10.2	C1203	0.04
High	DIFRYQDEV	4	1	1	Q13283		0	1.14267e+07	0	4.127e-05	47.65	0.00539939	2	1184.56	-0.408966	64.6075	0	C1203	44.44	A6802	75.7	A6802	0.7
High	FAMPYFIQV	29	1	1	Q00610		0	3.54896e+07	0	0.0008528	47.51	0.00685547	2	1115.56	0.0309629	100.99	0	C1203	88.89	C1203	5.8	C1203	0.01
High	QVFPGLLERV	26	1	1	Q9UBB4		0	6.32684e+07	0	0.001519	47.46	0.00468246	2	1157.67	-0.429634	70.977	0	C1203	40	A6802	53.3	A6802	0.5
High	SISDVIAQV	55	1	1	Q9HCJ1		0	381057079	0	0.00171	47.44	0.00773044	2	931.509	-0.352576	73.7336	0	C1203	48.15	A6802	10.4	A6802	0.08
High	KAITFVTQY	24	1	1	Q9H0S4		0	3.74356e+07	0	0.001056	47.43	0.00571971	2	1070.59	-0.836455	55.3326	0	C1203	77.78	B1503	10	B1503	0.2
High	SALEVVRKY	3	1	1	Q92797		0	4.9219e+06	0	0.001019	47.39	0.00372622	2	1064.61	-0.917691	36.8583	0	C1203	85.19	B1503	104.7	C1203	0.6
High	VKLPSGEDY	36	1	1	Q9Y2Z0		0	7.37386e+07	0	0.0002683	47.34	0.00942249	2	1007.5	-0.302079	44.0919	0	C1203	48.15	B1503	118.9	B1503	2.5
High	AQYDQASTKY	3	1	1	P49454		0	2.19508e+06	0	0.0003017	47.17	0.00558333	2	1174.54	-1.13312	31.103	0	C1203	40	B1503	4.9	B1503	0.05
High	ISTPVIRTF	13	1	1	Q9NZB2		0	1.26066e+08	0	0.001743	47	0.0038329	2	1033.6	-1.22919	57.51	0	C1203	77.78	B1503	37.8	C1203	0.25
High	GKIQFGYVY	28	1	1	Q969M3		0	6.06092e+07	0	0.000458	46.95	0.00822888	2	1074.56	-1.08394	58.4931	0	C1203	40.74	B1503	8.1	B1503	0.15
High	GKLPAGGVLY	16	1	1	P48634		0	2.24194e+07	0	5.812e-05	46.94	0.00634823	2	974.566	-0.676733	49.5679	0	C1203	34.29	B1503	41.8	B1503	1
High	LQRLENTQY	7	1	1	Q96D70		0	6.11433e+06	0	2.195e-07	46.89	0.0083321	2	1164.6	-0.554735	36.978	0	C1203	37.04	B1503	6.6	B1503	0.1
High	AQRPTEQEL	8	1	1	Q9ULW3		0	4.30074e+06	0	0.001396	46.85	0.00698512	2	1071.54	-0.404307	28.5786	0	C1203	51.85	B1503	62.6	B1503	1.4
High	AQRQDIAFAY	9	1	1	P07355		0	1.32537e+07	0	0.0008843	46.84	0.00771438	2	1182.59	-0.708811	51.4735	0	C1203	31.43	B1503	8.4	B1503	0.15
High	NSVFVATFL	23	1	1	O00767		0	1.89535e+07	0	0.001269	46.8	0.00756221	2	997.535	0.0357423	92.6599	0	C1203	66.67	A6802	17.4	A6802	0.17
High	TQMPDPKTF	45	1	1	Q9Y5V0		0	7.79625e+07	0	8.823e-06	46.68	0.00962443	2	1064.51	-1.31501	47.3466	0	C1203	48.15	B1503	4.4	B1503	0.04
High	MKVLLAAAL	14	1	1	P23284		0	18691242	0	2.407e-05	46.52	0.00204793	2	929.585	-0.249282	65.8029	0	C1203	37.04	B1503	17.6	B1503	0.5
High	KKIESSGVTY	12	1	1	Q9UKN8		0	4.55135e+06	0	0.0002365	46.52	0.00552095	2	1111.6	-0.868146	27.6278	0	C1203	31.43	B1503	10.6	B1503	0.25
High	LSAPIHTQM	22	1	1	Q8NG31		0	3.40174e+07	0	0.001668	46.4	0.00716927	2	997.513	-0.46333	43.8886	0	C1203	70.37	C1203	22	C1203	0.09
High	YKIAFPYLY	6	1	1	Q6P2Q9		0	6.23157e+06	0	6.249e-09	46.36	0.0096205	2	1177.63	-0.123452	79.3733	0	C1203	44.44	B1503	6.1	B1503	0.08
High	KIVDWAIQV	5	1	1	Q709F0		0	1.55928e+07	0	0.001442	46.35	0.00741103	2	1071.62	-1.10434	69.6339	0	C1203	44.44	C1203	508.3	C1203	1.7
High	ASYPELRLF	34	1	1	O75718		0	6.83399e+07	0	1.729e-05	46.3	0.00840875	2	1095.58	-0.279202	73.2949	0	C1203	77.78	B1503	26.2	C1203	0.4
High	SQFGTVTRF	31	1	1	Q9BYG3		0	2.93656e+08	0	1.33e-05	46.11	0.00889867	2	1042.53	-0.934316	49.2126	0	C1203	40.74	B1503	2.5	B1503	0.01
High	EVFPDQFIHL	72	1	1	P07686		0	4.44881e+08	0	5.097e-06	46.04	0.009103	2	1244.63	-0.410192	83.1624	0	C1203	40	A6802	43.9	A6802	0.4
High	TVTSVLEYL	53	1	1	O14893		0	9.27524e+07	0	0.001521	46.03	0.0056515	2	1024.56	-0.528726	89.127	0	C1203	40.74	A6802	19.5	A6802	0.17
High	AKAQALVQY	5	1	1	Q9Y2Q5		0	4.37287e+06	0	0.001359	45.84	0.00902772	2	991.556	-0.887819	37.9967	0	C1203	48.15	B1503	13.6	B1503	0.4
High	NAFPEIFYT	14	1	1	Q99570		0	2.32778e+07	0	0.00168	45.83	0.0080768	2	1101.53	0.131503	86.7242	0	C1203	51.85	A6802	147.1	A6802	1
High	EVFRIGNVEI	17	1	1	P15927		0	3.799e+07	0	9.631e-07	45.73	0.0103232	2	1175.64	-0.161672	76.1388	0	C1203	20	A6802	27.3	A6802	0.25
High	SAYPLSVEW	6	1	1	Q13610		0	4.16736e+07	0	0.00171	45.69	0.0120468	2	1051.51	0.0454424	83.7221	0	C1203	55.56	C1203	85.8	C1203	0.4
High	FAYEGPMYL	16	1	1	Q96MT1		0	2.04595e+07	0	2.618e-05	45.42	0.00675064	2	1090.49	-0.158427	82.448	0	C1203	88.89	C1203	2.1	C1203	0.01
High	NVIGEPFLNV	24	1	1	P33991		0	9.95306e+06	0	2.009e-05	45.35	0.0139759	2	1101.59	-0.130448	84.9922	0	C1203	28.57	A6802	18.5	A6802	0.17
High	KQFPEVIKY	36	1	1	Q9UIF9		0	1.17552e+08	0	3.724e-07	45.35	0.00713165	2	1151.65	-0.352442	46.2266	0	C1203	55.56	B1503	3.6	B1503	0.03
High	GQYSTGKTTF	15	3	3	Q9H4M9;Q9NZN3;Q9H223		0	8.30076e+06	0	0.0008807	45.33	0.0113865	2	1089.52	-0.985911	33.217	0	C1203	31.43	B1503	4.1	B1503	0.03
High	VQGIFVEKY	3	3	3	P62834;P61224;A6NIZ1		0	3.11795e+07	0	7.015e-06	45.23	0.00950585	2	1082.59	-0.498146	56.1431	0	C1203	44.44	B1503	47.3	B1503	1.1
High	KKGPSGYGF	26	1	1	O14745		0	4.1005e+07	0	0.001737	45.22	0.011635	2	940.488	-0.492815	27.4448	0	C1203	37.04	B1503	50.9	B1503	1.2
High	EAIDFIDSI	21	1	1	P28562		0	1.34262e+07	0	0.001589	45.11	0.011639	2	1022.5	-0.28315	90.3137	0	C1203	74.07	A6802	9.3	A6802	0.07
High	EIANILQEL	19	1	1	Q49AM1		0	1.30306e+07	0	0.001636	45.11	0.00941297	2	1042.58	-0.256079	91.4131	0	C1203	44.44	A6802	20.6	A6802	0.2
High	KKFVTQQQY	6	1	1	Q9Y4E5		0	2.03529e+06	0	6.388e-09	45.07	0.00991237	2	1169.63	-0.075336	25.2694	0	C1203	40.74	B1503	17.9	B1503	0.5
High	RAIDFSPYL	34	1	1	P17676		0	8.90522e+07	0	0.0002559	44.84	0.0125431	2	1081.57	-0.259705	68.8066	0	C1203	77.78	C1203	21.2	C1203	0.08
High	MKIPTGQEY	6	1	1	Q13557		0	1.59101e+07	0	0.0004825	44.68	0.0144946	2	1066.52	-0.525391	47.9437	0	C1203	48.15	B1503	7.4	B1503	0.12
High	FSFDYIVKW	22	1	1	Q9BSJ2		0	1.963e+07	0	2.952e-11	44.66	0.0160337	2	1204.6	-0.265769	87.7687	0	C1203	48.15	C1203	153.2	C1203	0.7
High	HVVDFFNRV	37	1	1	Q96BX8		0	9.19035e+07	0	1.526e-06	44.65	0.0142489	2	1132.59	0.574259	54.0322	0	C1203	40.74	A6802	4.3	A6802	0.01
High	STFIGEHYV	21	1	1	P08581		0	4.66074e+07	0	0.001744	44.64	0.0146562	2	1052.5	-0.303248	52.4657	0	C1203	70.37	A6802	6	A6802	0.03
High	KAFDFPSSF	12	1	1	Q7L945		0	1.41695e+07	0	0.0003139	44.63	0.0119817	2	1045.5	0.212154	67.879	0	C1203	77.78	B1503	3.2	C1203	0.01
High	GKLKQFDAY	8	1	1	Q9Y282		0	1.87107e+07	0	0.001674	44.58	0.0128066	2	1069.57	-0.719142	33.269	0	C1203	37.04	B1503	45.3	B1503	1.1
High	YNFEKPVVM	21	1	1	O43929		0	2.86629e+07	0	3.666e-08	44.58	0.0130435	2	1126.56	-0.400617	57.8363	0	C1203	51.85	B1503	28	C1203	0.15
High	SAISSVRLY	24	1	1	P42285		0	3.09157e+07	0	2.643e-05	44.54	0.00727554	2	995.551	-1.16661	52.3483	0	C1203	85.19	B1503	19.6	C1203	0.09
High	GKFQDNFEF	17	2	2	Q15691;Q9UPY8		0	2.04189e+07	0	0.001274	44.34	0.00773255	2	1131.51	-0.0491859	60.0479	0	C1203	37.04	B1503	18.8	B1503	0.5
High	SQYGSQVGY	11	1	1	Q14147		0	1.08086e+07	0	0.001531	44.22	0.00764265	2	988.437	-0.43425	43.568	0	C1203	48.15	B1503	3.5	B1503	0.02
High	AKYESQTSF	20	1	1	Q9P0U4		0	1.15521e+07	0	4.925e-05	44.19	0.0126952	2	1060.49	-0.49519	32.4248	0	C1203	40.74	B1503	2.8	B1503	0.01
High	GKNLYTNEY	6	3	3	Q9HCP0;P78368;Q9Y6M4		0	4.03187e+06	0	0.001334	44.12	0.0122586	2	1101.52	-0.301173	35.21	0	C1203	40.74	B1503	24.2	B1503	0.6
High	SAIPHPLIM	28	1	1	P61201		0	1.01347e+08	0	0.001713	44.04	0.00897982	2	978.543	-0.785597	58.8488	0	C1203	81.48	C1203	11.7	C1203	0.03
High	YSYFSPRTM	13	1	1	Q15003		0	1.60187e+07	0	0.001039	44.04	0.0107154	2	1151.52	0.051469	55.822	0	C1203	77.78	C1203	3.6	C1203	0.01
High	RHWGGQADF	7	1	1	Q6PJG6		0	6.3413e+06	0	7.188e-07	43.91	0.01022	2	1073.49	-0.401536	33.6335	0	C1203	33.33	B1503	56.4	B1503	1.3
High	STSDLYNFQV	20	1	1	P10914		0	6.53686e+07	0	3.117e-08	43.87	0.0114714	2	1173.54	0.0107596	75.2713	0	C1203	45.71	A6802	9.9	A6802	0.07
High	DTFVHVTDL	31	1	1	P62263		0	6.82946e+07	0	0.001098	43.81	0.0196767	2	1046.51	-0.616584	64.9343	0	C1203	74.07	A6802	288.5	A6802	1.6
High	AQVPFEQIL	37	1	1	Q99828		0	2.30902e+08	0	0.00153	43.79	0.0218003	2	1044.57	-0.151331	83.066	0	C1203	48.15	B1503	26.9	B1503	0.7
High	RKLFIGGLSF	29	4	4	Q32P51;P09651;P22626;P51991		0	6.42639e+07	0	0.001006	43.77	0.0039982	2	1137.68	-0.363431	65.3012	0	C1203	37.14	B1503	6	B1503	0.08
High	MTSEIHNTV	39	1	1	O43264		0	2.4133e+08	0	0.001198	43.75	0.0133087	2	1031.48	0.0507176	30.2827	0	C1203	77.78	A6802	2.4	A6802	0.01
High	EAWGSGVEVLV	8	1	1	P03923		0	1.00063e+07	0	0.001237	43.75	0.0200538	2	1145.58	0.11226	83.8162	0		0	A6802	434.7	A6802	2
High	YQFTGIKKY	31	1	1	Q96IX5		0	8.32477e+07	0	8.072e-08	43.71	0.0176176	2	1147.61	-0.71816	41.2649	0	C1203	51.85	B1503	2.6	B1503	0.01
High	NAYSRILQA	20	1	1	O15230		0	33664594	0	0.001124	43.68	0.0164798	2	1035.56	-0.164455	47.061	0	C1203	51.85	C1203	103	C1203	0.5
High	RKIPVPANRY	22	1	1	Q9NRX1		0	1.53759e+07	0	5.577e-07	43.63	0.00839711	3	1213.72	-0.0391514	30.93	0	C1203	31.43	B1503	52	B1503	1.2
High	SAYDNVNKV	15	1	1	P28482		0	8.82388e+06	0	0.0002358	43.62	0.0163245	2	1009.49	-0.31286	32.2145	0	C1203	85.19	C1203	11.1	C1203	0.03
High	FSMYKPITY	16	1	1	Q68CL5		0	2.65429e+07	0	0.0003461	43.6	0.0174039	2	1149.56	-0.684422	61.5728	0	C1203	81.48	C1203	5.1	C1203	0.01
High	HTVWIPWNV	26	1	1	Q9P273		0	8.72175e+07	0	0.0001018	43.49	0.0151349	2	1151.6	-0.127125	78.9126	0	C1203	70.37	A6802	3.7	A6802	0.01
High	SAYEIIRDY	18	1	1	O60287		0	2.52379e+07	0	5.331e-07	43.43	0.015661	2	1129.55	-0.779096	56.771	0	C1203	88.89	C1203	16.7	C1203	0.06
High	GKYFGGVLEY	27	1	1	O94955		0	7.02067e+07	0	0.0003889	43.34	0.0190824	2	1132.57	-0.486718	65.9305	0	C1203	40	B1503	16.5	B1503	0.4
High	VTYVPVTTF	18	1	1	P62899		0	3.89696e+07	0	0.0005369	43.32	0.0123194	2	1026.55	-0.659435	76.7823	0	C1203	74.07	B1503	14.3	C1203	0.3
High	HQQPPSQQY	23	1	1	Q15532		0	1.50498e+07	0	4.529e-06	43.31	0.0127678	2	1112.51	-0.28496	26.5608	0	C1203	44.44	B1503	6.9	B1503	0.12
High	SVITQVFHV	29	1	1	Q00341		0	1.05983e+08	0	0.00164	43.28	0.0202571	2	1029.57	-0.464345	69.1295	0	C1203	40.74	A6802	10.4	A6802	0.08
High	STSDIITRI	72	2	2	P49585;Q9Y5K3		0	1.43481e+09	0	0.00119	43.2	0.01439	2	1005.56	-0.787664	51.6958	0	C1203	70.37	A6802	16.4	A6802	0.15
High	IVTEIISEI	16	1	1	Q9BPX3		0	7.84625e+07	0	0.001666	43.1	0.013562	2	1016.59	-0.361571	83.8343	0	C1203	40.74	C1203	62.4	C1203	0.3
High	EVFDKTYQF	37	1	1	Q96EU6		0	1.66021e+08	0	0.001577	42.97	0.0191897	2	1176.56	-1.16235	59.1381	0	C1203	37.04	A6802	307.5	A6802	1.6
High	FVGYFPATV	18	1	1	Q9HCE1		0	3.49957e+07	0	0.001669	42.88	0.0193674	2	1000.51	-0.100739	80.035	0	C1203	48.15	C1203	25	C1203	0.1
High	GKAFFLSSY	9	1	1	O75123		0	1.82732e+07	0	0.000387	42.72	0.0261135	2	1019.52	-0.170165	61.6061	0	C1203	40.74	B1503	7.4	B1503	0.12
High	EVYAGNFVEV	13	1	1	Q9UBS4		0	1.73548e+07	0	1.247e-06	42.64	0.0216549	2	1126.54	-0.117053	72.4534	0	C1203	31.43	A6802	6	A6802	0.03
High	RQQPPSTTTF	21	1	1	A3KN83		0	1.78285e+07	0	9.202e-07	42.6	0.0225834	2	1162.58	-0.437796	33.9757	0	C1203	37.14	B1503	4.8	B1503	0.05
High	DTVTQFDNV	8	1	1	Q8TAQ2		0	1.53485e+07	0	0.00162	42.58	0.0180778	2	1038.47	-0.889104	61.3286	0	C1203	66.67	A6802	19.9	A6802	0.17
High	FAIPLIEKL	6	1	1	Q9NR30		0	1.37431e+07	0	1.119e-07	42.5	0.00744821	2	1043.65	-0.517069	82.7481	0	C1203	88.89	C1203	19.4	C1203	0.07
High	RKFPAGKVPAF	43	1	1	P26641		0	4.23301e+07	0	6.436e-06	42.47	0.00932596	3	1217.71	-0.513216	38.0213	0		0	B1503	24	B1503	0.6
High	GKFGGDFLVY	37	1	1	Q9BSV6		0	1.34318e+08	0	0.001419	42.43	0.0224677	2	1102.56	-0.452845	69.2914	0	C1203	54.29	B1503	9.5	B1503	0.2
High	ETIMNQEKL	25	1	1	P20290		0	5.35529e+07	0	6.366e-05	42.43	0.0290711	2	1105.55	-1.00058	42.4938	0	C1203	66.67	A6802	227	A6802	1.4
High	YVFSKTYNV	12	1	1	Q14432		0	1.40003e+07	0	6.626e-09	42.33	0.0280114	2	1120.57	-0.583018	52.7201	0	C1203	48.15	A6802	3.8	A6802	0.01
High	GKVGAHAGEY	16	1	1	P69905		0	3.49519e+06	0	0.001561	42.31	0.0219897	2	988.484	-0.539049	20.4997	0	C1203	31.43	B1503	121.5	B1503	2.5
High	YASENVNKL	2	2	2	P62820;Q9H0U4		0	1.04552e+07	0	8.088e-05	42.09	0.0235866	2	1037.53	-0.999703	36.1336	0	C1203	88.89	C1203	14.1	C1203	0.04
High	KQMEQISQF	27	2	2	P37802;Q9UI15		0	51462091	0	0.001161	42.07	0.0219663	2	1138.56	-0.0820582	45.8374	0	C1203	37.04	B1503	2.3	B1503	0.01
High	EAAAVFKTL	37	1	1	Q8IWZ6		0	8.31644e+07	0	0.001338	42.04	0.0203744	2	949.535	-0.0372613	51.5579	0	C1203	85.19	A6802	38.7	A6802	0.4
High	RVFPYSVFY	58	1	1	O15118		0	4.27687e+08	0	4.971e-08	42.03	0.0306038	2	1177.6	0.0783585	74.677	0	C1203	51.85	B1503	7.9	C1203	0.09
High	YKVEYPIMY	24	1	1	O14880		0	3.50612e+07	0	8.114e-08	41.96	0.02544	2	1205.59	-0.623487	65.1824	0	C1203	51.85	B1503	7.7	B1503	0.12
High	AKKISQLGY	15	1	1	P26196		0	7.02141e+06	0	0.0001617	41.88	0.0109392	2	1007.59	-0.559863	28.7019	0	C1203	44.44	B1503	89.1	B1503	1.7
High	LVSPITGEKI	5	1	1	Q15459		0	32184014	0	0.00147	41.71	0.012698	2	1056.63	0.288958	56.5002	0	C1203	20	A6802	213.1	A6802	1.3
High	RKLDPPGGQFY	27	1	1	O95400		0	3.20041e+07	0	1.31e-07	41.59	0.0266137	2	1277.66	-0.483511	45.8877	0		0	B1503	443.7	B1503	4.5
High	EVLDILTRL	22	1	1	O75955		0	2.15322e+07	0	0.0001992	41.53	0.0143849	2	1071.64	-0.090171	83.678	0	C1203	40.74	A6802	40.6	A6802	0.4
High	ETFAFQAEI	36	5	5	Q58FF8;Q58FF7;Q14568;P07900;P08238		0	5.44857e+07	0	0.0005512	41.52	0.0280891	2	1055.5	-0.00868779	79.5733	0	C1203	66.67	A6802	3	A6802	0.01
High	STVEVIFHV	17	2	2	Q6GYQ0;Q2PPJ7		0	5.60635e+07	0	0.001682	41.5	0.0395883	2	1030.56	-0.356329	66.9176	0	C1203	74.07	A6802	2.6	A6802	0.01
High	EIFNLKFAQA	25	1	1	P78347		0	4.7561e+07	0	1.847e-05	41.42	0.0237533	2	1180.64	-0.50452	70.0055	0	C1203	8.57	A6802	102.8	A6802	0.8
High	KAYFDVKEY	13	1	1	Q9UJX2		0	1.30553e+07	0	1.845e-08	41.24	0.0334322	2	1162.58	0.102555	44.2646	0	C1203	88.89	B1503	16.5	C1203	0.25
High	YVTDVLYRV	25	1	1	Q96Q15		0	1.31088e+08	0	0.0005804	41.21	0.0259745	2	1127.61	-0.880796	64.8505	0	C1203	44.44	A6802	5	A6802	0.02
High	FSWEGAFQHV	20	1	1	P26641		0	3.24248e+07	0	3.038e-07	41.16	0.0201467	2	1207.55	-0.491463	73.2227	0	C1203	60	A6802	55.8	A6802	0.5
High	ETAGIGASAHLV	4	1	1	P43490		0	7.66167e+06	0	0.0001237	41.05	0.0264232	2	1125.59	-0.46041	50.1861	0		0	A6802	13	A6802	0.12
High	ETLFPSKIGV	31	2	2	Q9H8S9;Q7L9L4		0	8.05222e+07	0	0.0009401	41.04	0.0248628	2	1090.61	-0.704476	64.3493	0	C1203	45.71	A6802	6.4	A6802	0.04
High	DVARISWYL	23	1	1	Q13011		0	1.83418e+07	0	0.0005015	40.94	0.0302259	2	1122.59	-0.413062	79.4721	0	C1203	40.74	A6802	8	A6802	0.05
High	YTFESTIIY	24	1	1	Q4LDE5		0	3.20656e+07	0	0.001101	40.91	0.0283958	2	1136.55	-0.0707236	80.0596	0	C1203	81.48	C1203	6.8	C1203	0.01
High	ETYQFSGVYV	25	1	1	P61160		0	1.35362e+08	0	0.0004002	40.6	0.0266471	2	1192.55	-0.452835	75.6864	0	C1203	45.71	A6802	3.8	A6802	0.01
High	YTFGRIVIY	15	1	1	Q9UBB9		0	2.50851e+07	0	6.192e-05	40.56	0.0301329	2	1131.62	-0.479911	72.4712	0	C1203	85.19	C1203	5.7	C1203	0.01
High	NTYGFPIIF	22	1	1	P11498		0	3.37007e+07	0	0.001181	40.47	0.0335235	2	1071.55	-0.493362	100.127	0	C1203	74.07	C1203	39.9	C1203	0.2
High	RTTDIVIRI	14	1	1	Q9C0C9		0	70693972	0	0.0009578	40.36	0.0127298	2	1086.66	-0.570725	48.3614	0	C1203	70.37	A6802	375.8	C1203	1.4
High	SAYARLIDY	20	1	1	P34897		0	3.04912e+07	0	0.0008764	40.35	0.0366076	2	1071.55	-0.947476	56.6313	0	C1203	81.48	B1503	12.7	C1203	0.05
High	TTIDVRTTF	24	1	1	Q8IY21		0	7.66712e+07	0	0.001087	40.34	0.0298076	2	1053.56	0.117209	53.8924	0	C1203	66.67	C1203	46.1	C1203	0.25
High	DTTYINHVV	60	1	1	Q9UBR2		0	8.56174e+08	0	0.001573	40.29	0.0462324	2	1061.53	-0.96768	51.8873	0	C1203	70.37	A6802	8.7	A6802	0.06
High	YIKDFFEQM	8	1	1	Q5U649		0	2.94041e+07	0	0.0001965	40.29	0.0298815	2	1220.57	0.241091	72.8729	0	C1203	37.04	C1203	55.3	C1203	0.25
High	EAAGIMENI	24	1	1	O60341		0	4.59897e+07	0	0.001389	40.28	0.0384541	2	947.45	-0.0183161	63.0436	0	C1203	74.07	A6802	6.1	A6802	0.03
High	FAFPDEFVF	17	2	2	O14908;Q8TF65		0	1.28258e+07	0	0.001082	40.27	0.0288636	2	1118.52	0.0674807	104.14	0	C1203	85.19	B1503	8.6	C1203	0.12
High	MAFDPTSTLL	13	1	1	Q12788		0	6.24722e+06	0	0.00026	40.25	0.0352701	2	1095.54	0.426347	87.6393	0	C1203	80	C1203	28.8	C1203	0.12
High	SAIDRIFTL	35	1	1	Q86TU7		0	1.05451e+08	0	0.001029	39.98	0.0271698	2	1035.58	-0.540787	77.054	0	C1203	85.19	C1203	10.1	C1203	0.03
High	DVYDKVDYL	21	1	1	Q14254		0	5.32735e+07	0	4.867e-05	39.94	0.0306505	2	1129.54	-0.347236	62.9425	0	C1203	48.15	A6802	48.3	A6802	0.5
High	RLWEQLVHF	27	1	1	Q5JS54		0	6.81897e+07	0	3.026e-06	39.85	0.0335127	2	1227.66	-0.276814	69.4492	0	C1203	37.04	B1503	12.6	B1503	0.3
High	AQVWMITRY	2	1	1	Q9BVK8		0	7.87827e+06	0	1.816e-05	39.83	0.0354301	2	1167.6	-0.542706	64.3129	0	C1203	44.44	B1503	5.7	B1503	0.07
High	KQTQTFTTY	17	3	3	P54652;P17066;P11142		0	1.29187e+07	0	0.00102	39.7	0.0511597	2	1117.55	-0.996974	34.1699	0	C1203	40.74	B1503	2.2	B1503	0.01
High	YAYDGKDYIA	31	16	16	P01892;P30447;P05534;P10316;P01889;P30460;Q04826;P30479;P30480;P30486;P18464;P30490;P30498;Q31610;P30499;P04222		0	1.12887e+08	0	2.044e-08	39.65	0.0321493	2	1178.54	-0.747742	49.5311	0	C1203	45.71	A6802	498.4	C1203	2
High	RKKPTTEGF	13	1	1	Q03111		0	4.58762e+06	0	1.074e-06	39.64	0.034456	2	1063.59	-0.45548	19.0005	0	C1203	37.04	B1503	39.5	B1503	1
High	VKVIQQESY	28	1	1	P60228		0	3.59702e+07	0	3.956e-05	39.56	0.0386156	2	1093.59	-0.0352821	39.6168	0	C1203	40.74	B1503	88.8	B1503	1.7
High	DIFEFLNHV	5	1	1	Q86VP6		0	3.42164e+06	0	4.694e-07	39.51	0.0535371	2	1133.56	0.141535	94.6018	0	C1203	44.44	A6802	6.4	A6802	0.04
High	TGYIYPRLY	4	1	1	O14656		0	9.382e+06	0	0.0001187	39.4	0.0436872	2	1145.6	-0.156092	62.1126	0	C1203	48.15	B1503	84.8	C1203	0.5
High	YAYFNFPEL	13	1	1	Q8IY21		0	5.09814e+06	0	0.0009274	39.25	0.0430297	2	1163.54	-0.203136	96.7003	0	C1203	85.19	C1203	5	C1203	0.01
High	EVFAWNNEV	28	1	1	P49419		0	5.07069e+07	0	0.001381	39.2	0.0372762	2	1107.51	-0.491134	75.4294	0	C1203	44.44	A6802	3.2	A6802	0.01
High	GKNPDEVSY	17	1	1	O95391		0	2.8391e+07	0	0.0008803	39.19	0.0487678	2	1008.46	0.00310838	29.3545	0	C1203	48.15	B1503	70	B1503	1.5
High	GKFGITSAF	4	1	1	Q9H015		0	9.66712e+06	0	0.001331	39.08	0.0470402	2	927.494	0.224953	56.9445	0	C1203	37.04	B1503	4.3	B1503	0.04
High	YVTSILQSL	17	1	1	Q69YN4		0	3.63143e+07	0	0.001435	38.82	0.025004	2	1023.57	-0.399022	84.0608	0	C1203	44.44	C1203	20.8	C1203	0.08
High	TTTEITHHGT	20	1	1	P15924		0	1.56257e+07	0	0.001168	38.67	0.0424541	2	1097.52	-0.387405	18.6172	0	C1203	20	A6802	193.4	A6802	1.2
High	YSFGHPSSV	40	1	1	P31327		0	1.40397e+08	0	0.0004064	38.57	0.0420878	2	980.447	-0.549166	41.3811	0	C1203	81.48	C1203	2.9	C1203	0.01
High	KSFEAPIKL	9	1	1	Q8TCT9		0	1.7222e+07	0	0.0005352	38.39	0.0312138	2	1032.61	0.0707117	47.3957	0	C1203	81.48	C1203	102	C1203	0.5
High	EVFNYIHNI	27	1	1	Q8N3P4		0	7.2372e+07	0	2.6e-05	38.26	0.0622346	2	1148.57	-0.40542	64.4463	0	C1203	37.04	A6802	4.4	A6802	0.01
High	KQFQSPSTL	16	1	1	Q8NAP3		0	6.85223e+06	0	0.001333	38.19	0.0688893	2	1035.55	-0.28279	36.471	0	C1203	48.15	B1503	3.6	B1503	0.03
High	TTFEHAHNm	35	1	1	P13639	M9(Oxidation)	0	2.29825e+06	0	0.0009805	38.19	0.0151402	2	1103.46	-0.498	18.5697	0	C1203	66.67	C1203	25.6	C1203	0.1
High	GQYSTGKTSF	20	1	1	Q9NZN4		0	1.90165e+07	0	0.000186	38.16	0.0551451	2	1075.5	-0.862014	32.3171	0	C1203	34.29	B1503	3.8	B1503	0.03
High	FAFPLHVDY	23	1	1	Q8TDY4		0	4.35383e+07	0	3.699e-05	38.16	0.0532357	2	1108.55	-0.0461173	77.2383	0	C1203	92.59	C1203	8.8	C1203	0.02
High	KLVDFVIHF	22	1	1	P59998		0	3.41907e+07	0	1.805e-08	38.16	0.0364248	2	1117.64	0.162216	75.8139	0	C1203	40.74	B1503	15.8	B1503	0.4
High	TTVEDLGSKI	9	1	1	P35613		0	1.73429e+07	0	0.001471	38.14	0.0529213	2	1062.57	-0.789757	50.8781	0	C1203	31.43	A6802	91	A6802	0.7
High	FTITPPTAQV	34	1	1	P52907		0	6.45708e+07	0	0.001745	38.1	0.079555	2	1074.58	-0.318356	71.1547	0	C1203	51.43	A6802	7.3	A6802	0.05
High	EIIDFFLGA	37	1	1	P15880		0	3.96254e+07	0	0.001686	38.08	0.0522415	2	1024.53	-0.427319	104.624	0	C1203	7.41	A6802	8.1	A6802	0.05
High	IKYDPSIGIY	2	1	1	P62913		0	1.25459e+07	0	0.0005074	38.08	0.0447651	2	1168.63	0.142303	63.6249	0	C1203	42.86	B1503	13.3	B1503	0.3
High	SIYGSYRNF	21	1	1	Q7L576		0	3.32426e+07	0	0.0004883	37.93	0.0593201	2	1106.53	-0.564646	51.798	0	C1203	40.74	B1503	33.7	B1503	0.8
High	RSTKTGTAY	12	1	1	P17844		0	1.78258e+07	0	0.0004467	37.83	0.0579824	2	984.511	-0.247416	16.6676	0	C1203	66.67	B1503	17	B1503	0.5
High	STYIKKIGY	12	2	2	P68104;Q5VTE0		0	8.36166e+06	0	0.0005973	37.82	0.0695559	2	1072.6	-0.507445	35.3652	0	C1203	74.07	B1503	514.4	C1203	2
High	EVSPVSFHQV	59	1	1	Q8N543		0	5.41608e+08	0	2.065e-05	37.78	0.0642807	2	1128.57	-0.571235	50.1965	0	C1203	25.71	A6802	5.5	A6802	0.03
High	QLVDIIEKV	26	1	1	P61289		0	5.25651e+07	0	0.00166	37.74	0.0317773	2	1056.63	-0.519738	70.8655	0	C1203	44.44	A6802	145.4	A6802	1
High	SKLPSSIEY	2	1	1	Q15386		0	1.47816e+07	0	0.00061	37.68	0.0482395	2	1023.54	-0.634587	46.3574	0	C1203	51.85	B1503	11.5	B1503	0.25
High	EAFIAWIHV	17	1	1	P21283		0	1.45172e+07	0	0.001231	37.6	0.0461994	2	1085.58	-0.0782184	83.6497	0	C1203	81.48	A6802	19.9	A6802	0.17
High	HAAGVLLHV	32	1	1	Q6UX98		0	3.41423e+07	0	0.00109	37.5	0.0504409	2	916.536	-0.452824	37.7269	0	C1203	85.19	A6802	6.7	A6802	0.04
High	VmAPRTLVL	160	9	9	P01892;P30447;P05534;P18462;P30450;P30456;P30457;P01891;P10316	M2(Oxidation)	0	3.34364e+08	0	0.001673	37.47	0.035839	2	1015.6	-0.376251	53.0185	0	C1203	59.26	B1503	10.1	B1503	0.2
High	FLWAGGRASY	3	1	1	Q00839		0	7.78649e+06	0	3.031e-07	37.38	0.0587917	2	1127.56	-0.343653	59.9784	0	C1203	42.86	B1503	12.9	B1503	0.3
High	KAIDYIRFL	32	1	1	P36956		0	4.65232e+07	0	5.258e-06	37.33	0.0296993	2	1138.66	-0.355398	66.3405	0	C1203	85.19	C1203	20.2	C1203	0.08
High	KKIEKLEEY	14	1	1	O95786		0	5.58412e+06	0	2.287e-05	37.32	0.039749	2	1179.66	-0.18695	24.6499	0	C1203	44.44	B1503	30.6	B1503	0.8
High	FVNDIFERIA	8	14	14	P33778;P62807;P58876;Q93079;P06899;O60814;Q99880;Q99879;Q99877;P23527;Q16778;Q5QNW6;Q8N257;P57053		0	1.62915e+07	0	1.88e-06	37.29	0.0701665	2	1223.64	-0.45461	74.3408	0	C1203	14.29	A6802	212.5	A6802	1.3
High	SVFGFSFKL	13	1	1	P26639		0	1.41717e+07	0	0.0002814	37.28	0.0776801	2	1031.56	-0.131353	84.4778	0	C1203	44.44	A6802	12.6	A6802	0.1
High	TKQGWSSAY	1	2	2	Q7Z7E8;Q8WVN8		0	4527540	0	0.000201	37.22	0.061017	2	1027.48	-0.890782	34.3878	0	C1203	40.74	B1503	16	B1503	0.4
High	EVFPLAMNYL	29	3	3	P24385;P30279;P30281		0	3.77613e+07	0	2.599e-05	37.05	0.0751493	2	1196.6	0.133002	99.2056	0	C1203	40	A6802	11.2	A6802	0.09
High	GHYLGEFSITY	26	1	1	P62841		0	6.281e+07	0	3.466e-06	36.93	0.0635172	2	1286.6	-0.419277	70.5668	0		0	B1503	127.4	B1503	2.5
High	KQIESKTAF	16	1	1	P10599		0	8.45171e+06	0	0.001014	36.7	0.0610067	2	1051.58	-0.219453	23.785	0	C1203	33.33	B1503	2.3	B1503	0.01
High	RQFPTAFEF	18	1	1	Q13614		0	2.1115e+07	0	0.001592	36.64	0.0648685	2	1142.56	-0.477673	70.5221	0	C1203	44.44	B1503	2.3	B1503	0.01
High	RVYPQAVYF	33	1	1	Q9Y4A5		0	1.88633e+08	0	6.259e-05	36.51	0.0630091	2	1142.6	-0.676492	58.4907	0	C1203	44.44	B1503	7.1	C1203	0.09
High	GQYSPPPYSEY	26	1	1	Q96BY9		0	4.66891e+07	0	1.065e-08	36.43	0.0349569	2	1287.55	-0.599392	58.498	0		0	B1503	17.7	B1503	0.5
High	FVNEIISRI	1	1	1	P43246		0	1.86579e+07	0	7.409e-05	36.34	0.05772	2	1090.63	-0.144404	67.301	0	C1203	40.74	C1203	17	C1203	0.06
High	KHFGTILNY	22	2	2	Q13829;Q9H3F6		0	3.58469e+07	0	0.0001682	36.33	0.079353	2	1092.58	-0.3494	46.2326	0	C1203	51.85	B1503	8.4	B1503	0.15
High	DVIDFTGHAL	1	2	2	P31150;P50395		0	1.34283e+07	0	0.001053	36.31	0.0968045	2	1087.54	-0.321638	72.2921	0	C1203	40	A6802	32.3	A6802	0.3
High	KQFRPPMGGY	8	1	1	Q9UKK9		0	1.49446e+07	0	1.354e-06	36.29	0.0895915	2	1180.59	-0.140712	41.6349	0	C1203	42.86	B1503	10.3	B1503	0.25
High	KKSDPVVSY	34	1	1	P13639		0	1.51698e+08	0	0.001723	36.12	0.0727043	2	1022.55	-1.17122	25.5201	0	C1203	51.85	B1503	9.1	B1503	0.17
High	DVSKIFQVV	20	1	1	Q5TF58		0	3.96512e+07	0	0.001659	36.11	0.0707902	2	1034.59	-0.412934	73.8265	0	C1203	44.44	A6802	44.3	A6802	0.4
High	FQYPDTRYL	24	1	1	Q9NY61		0	4.03678e+07	0	3.048e-05	36.07	0.0808254	2	1202.58	-0.337222	62.1445	0	C1203	55.56	B1503	5.4	C1203	0.01
High	NVAEVTQSEI	9	2	2	Q9NVD7;Q9HBI1		0	1.66818e+07	0	0.001546	35.98	0.103236	2	1089.54	-0.791035	52.3685	0	C1203	14.29	A6802	21.9	A6802	0.2
High	YAFPKSITVF	19	1	1	P53985		0	4.20719e+07	0	3.653e-06	35.92	0.0919812	2	1172.64	0.204842	74.7217	0	C1203	77.14	B1503	5.9	C1203	0.06
High	RSSPPGHYY	30	1	1	Q9NX40		0	1.19934e+07	0	3.522e-05	35.81	0.0965844	2	1063.5	-0.391646	25.5842	0	C1203	77.78	B1503	28.9	C1203	0.5
High	RQYAKDIGF	18	1	1	P62273		0	1.77347e+07	0	1.647e-06	35.7	0.0872326	2	1097.57	-0.520707	38.0791	0	C1203	37.04	B1503	2.6	B1503	0.01
High	EIIQRIENV	21	1	1	Q9H074		0	2.90784e+07	0	0.0009042	35.7	0.0846219	2	1113.63	-1.01617	52.1669	0	C1203	40.74	A6802	26.7	A6802	0.25
High	ETFPANIQV	57	1	1	Q5VYK3		0	1.09632e+09	0	0.001084	35.58	0.160192	2	1018.52	-0.537324	70.6797	0	C1203	81.48	A6802	3.5	A6802	0.01
High	EGYPGQRYY	17	1	1	P34896		0	1.38564e+07	0	0.001679	35.5	0.0563395	2	1132.51	-0.346672	44.5559	0	C1203	51.85	C1203	213.1	C1203	0.9
High	AKYLDEDTIY	2	1	1	P31153		0	1.25095e+07	0	2.353e-05	35.44	0.105817	2	1230.59	-0.377701	55.9732	0	C1203	34.29	B1503	39.2	B1503	1
High	EVMEWMNNV	7	1	1	Q92598		0	8.549e+06	0	2.155e-06	35.4	0.0475721	2	1151.49	0.0610369	78.5427	0	C1203	40.74	A6802	2.7	A6802	0.01
High	AKVDLNSNGF	1	1	1	P13797		0	5.33205e+06	0	2.098e-05	35.32	0.129359	2	1064.54	-0.22401	44.6925	0	C1203	37.14	B1503	137.4	B1503	2.5
High	DVFHMVVEV	26	1	1	Q15181		0	3.78896e+08	0	0.0008862	35.22	0.132147	2	1074.53	-0.155582	82.7042	0	C1203	51.85	A6802	14.1	A6802	0.12
High	RKFDAIYKY	7	1	1	Q5C9Z4		0	5.44628e+06	0	0.0001761	35.1	0.125002	3	1203.65	0.838302	36.2756	0	C1203	48.15	B1503	13	B1503	0.3
High	NTIPFIIRY	37	1	1	Q8N5C6		0	1.55059e+08	0	0.0001373	34.96	0.0683308	2	1136.65	-0.432631	72.8926	0	C1203	81.48	C1203	142.6	C1203	0.7
High	RSYPYAFSV	22	1	1	Q5H9F3		0	3.87121e+07	0	0.001653	34.82	0.12189	2	1089.54	-0.641714	57.7021	0	C1203	77.78	C1203	13.9	C1203	0.04
High	RQYPEVIKY	18	1	1	Q9UIF8		0	2.57221e+07	0	0.0002291	34.78	0.105204	2	1195.65	-0.502989	41.4268	0	C1203	55.56	B1503	2.8	B1503	0.01
High	TAAFWTRLY	8	2	2	Q8IXX5;Q1AE95		0	1.03221e+07	0	3.625e-05	34.74	0.101594	2	1128.58	-0.56344	72.1704	0	C1203	81.48	C1203	28.2	C1203	0.12
High	YLYGQTTTY	13	1	1	P11388		0	2.80747e+07	0	8.57e-09	34.68	0.11036	2	1109.51	-0.459124	56.0568	0	C1203	51.85	B1503	3	B1503	0.01
High	QGYGSGRYY	7	1	1	P98179		0	5.535e+06	0	8.705e-05	34.57	0.0839857	2	1050.46	-0.490065	35.0877	0	C1203	48.15	B1503	58.4	C1203	0.8
High	TKYLENQAF	5	1	1	Q99661		0	9.64028e+06	0	0.001647	34.56	0.131369	2	1113.56	-0.428236	46.0195	0	C1203	33.33	B1503	9.3	B1503	0.17
High	MPAFIFEHI	15	1	1	O00560		0	2.83642e+07	0	0.001043	34.55	0.15284	2	1104.55	-0.208538	79.694	0	C1203	33.33	A6802	21.7	A6802	0.2
High	FVAPFPLSIW	1	1	1	Q6BDS2		0	1.52918e+06	0	0.0001696	34.53	0.111948	2	1176.64	-0.571499	107.384	0	C1203	8.57	C1203	301.3	C1203	1.2
High	DTFFRPLNV	31	1	1	Q13444		0	1.1614e+08	0	0.001198	34.51	0.132661	2	1108.58	0.366046	72.4477	0	C1203	77.78	A6802	19.7	A6802	0.17
High	SQFKGYFIF	29	1	1	Q9NY27		0	5.08861e+07	0	0.001611	34.34	0.135471	2	1136.58	-0.196373	76.1905	0	C1203	33.33	B1503	2.2	B1503	0.01
High	EAFQGTKVFV	29	1	1	P61289		0	7.89873e+07	0	0.001461	34.29	0.137319	2	1125.59	-0.669916	55.3671	0	C1203	68.57	A6802	13	A6802	0.12
High	YKKGKDSLY	19	2	2	P83881;Q969Q0		0	5.6663e+06	0	0.0001026	34.24	0.181063	2	1101.59	-0.435653	20.87	0	C1203	44.44	B1503	33.8	B1503	0.8
High	RKIGDTSVSY	18	1	1	P20700		0	1.53802e+07	0	0.001643	34.15	0.129415	2	1125.59	-0.334191	33.0143	0	C1203	37.14	B1503	11	B1503	0.25
High	RAYQQSEAY	30	1	1	Q9P0W2		0	5.22514e+07	0	0.001722	33.82	0.100813	2	1115.51	-0.644945	27.0418	0	C1203	77.78	B1503	4	B1503	0.03
High	RQQQSQTAY	12	2	2	Q99613;B5ME19		0	4.52729e+06	0	0.001692	33.74	0.156218	2	1109.53	-0.382789	19.1767	0	C1203	37.04	B1503	3.1	B1503	0.01
High	YAYPYSYYY	11	1	1	Q96PV6		0	2.31536e+07	0	5.52e-07	33.67	0.0478289	2	1252.52	-0.0817961	75.926	0	C1203	88.89	C1203	2.9	C1203	0.01
High	YSYWTKNGV	5	1	1	Q9Y639		0	7.70129e+06	0	0.0002631	33.6	0.132941	2	1117.53	-0.658705	47.2516	0	C1203	74.07	A6802	11.6	A6802	0.09
High	RNYYRKIGY	19	1	1	Q9H9T3		0	1.4234e+07	0	3.469e-05	33.55	0.218445	3	1232.65	-0.0286231	31.0456	0	C1203	44.44	B1503	72.3	B1503	1.5
High	HSVYIPNKV	23	1	1	Q8TB22		0	1.88515e+07	0	0.001137	33.49	0.135814	2	1056.58	-0.476837	34.6607	0	C1203	70.37	A6802	20	A6802	0.17
High	KQPDNSPEY	23	1	1	Q9NX07		0	9.53102e+06	0	0.001745	33.33	0.142606	2	1077.48	-0.314344	24.5028	0	C1203	44.44	B1503	27.2	B1503	0.7
High	YAKDDPLEF	1	1	1	P06756		0	1.33002e+07	0	0.00104	33.29	0.14927	2	1097.51	-0.73215	56.7216	0	C1203	85.19	B1503	28.5	C1203	0.2
High	HTILIVEKV	24	1	1	Q8TD19		0	2.77933e+07	0	0.001159	33.22	0.0268231	2	1051.65	-0.118666	47.3418	0	C1203	70.37	A6802	7.1	A6802	0.04
High	RQYGSEGRFTF	21	2	2	Q7Z7H5;Q9BVK6		0	2.45697e+07	0	0.001519	33.22	0.188286	3	1347.64	-0.222132	43.5969	0		0	B1503	8.2	B1503	0.15
High	FASTILHLV	25	1	1	P61803		0	4.0166e+07	0	0.0001974	32.93	0.188172	2	1000.58	-0.186132	71.0487	0	C1203	81.48	A6802	5.7	A6802	0.03
High	EVNSGIYRV	37	1	1	Q0VDF9		0	1.11628e+08	0	0.001675	32.93	0.209768	2	1036.54	-0.175115	41.7509	0	C1203	44.44	A6802	9.6	A6802	0.07
High	FGFHKPKMY	21	1	1	Q9NP50		0	2.88288e+07	0	5.976e-05	32.88	0.183164	2	1154.58	-0.740723	40.6394	0	C1203	51.85	C1203	38.2	C1203	0.17
High	STYQGERAY	9	1	1	Q92900		0	1.63726e+06	0	0.0006261	32.86	0.115763	2	1074.48	-0.272214	27.5549	0	C1203	74.07	B1503	18.4	C1203	0.12
High	RQLEDILSTY	24	1	1	P40222		0	2.84405e+07	0	0.00105	32.86	0.19123	2	1237.64	-0.255266	66.3158	0	C1203	28.57	B1503	5.5	B1503	0.07
High	GKYGFSDPLTF	12	2	2	Q92569;P27986		0	1.10733e+07	0	0.000593	32.84	0.188213	2	1231.6	-0.296101	72.2101	0		0	B1503	51	B1503	1.2
High	AKQDVVLNY	16	1	1	Q15029		0	1.46796e+07	0	0.001739	32.83	0.220987	2	1049.56	-0.535445	43.8741	0	C1203	51.85	B1503	28.2	B1503	0.7
High	ASFDGRISVY	17	1	1	O94979		0	4.92248e+07	0	0.001314	32.79	0.198992	2	1114.55	-0.227416	57.7557	0	C1203	80	B1503	29.5	C1203	0.4
High	EVIWLTQHV	13	1	1	Q9UJW0		0	2.29742e+07	0	0.00127	32.75	0.165928	2	1124.61	-0.651641	67.0704	0	C1203	37.04	A6802	3.6	A6802	0.01
High	TTFDKEFLL	24	1	1	O60306		0	5.0179e+07	0	0.001677	32.47	0.172873	2	1113.58	-0.230104	72.3202	0	C1203	74.07	A6802	22.5	A6802	0.25
High	RKFTQLREY	7	1	1	O95625		0	4.87429e+06	0	0.0007552	32.32	0.148469	3	1240.68	-0.0981059	31.2857	0	C1203	48.15	B1503	7.3	B1503	0.12
High	RMNPNSPSITY	5	1	1	P84090		0	8.31051e+06	0	0.0001022	32.28	0.18581	2	1279.61	-0.53983	46.3918	0		0	B1503	22.1	B1503	0.6
High	RLFGTTVTF	37	1	1	Q15904		0	1.75487e+08	0	6.911e-05	32.07	0.194332	2	1041.57	-0.585794	64.8699	0	C1203	44.44	B1503	3	B1503	0.01
High	FTAPTFTGSFL	3	1	1	Q9NXE4		0	4.89144e+06	0	2.185e-05	32.05	0.247592	2	1188.59	-0.759162	91.412	0		0	A6802	69.6	A6802	0.6
High	EAIGYFEQQL	2	1	1	Q96AY4		0	5.51851e+06	0	6.23e-07	32.04	0.23941	2	1197.58	0.399023	77.3325	0	C1203	62.86	A6802	281.3	A6802	1.5
High	RKKPPMNSM	16	1	1	Q01844		0	5.0285e+06	0	0.000856	31.9	0.299261	2	1088.57	-0.374264	18.6678	0	C1203	37.04	B1503	30.7	B1503	0.8
High	YTSDLHFQV	30	1	1	Q1KMD3		0	6.42652e+07	0	0.000371	31.9	0.243283	2	1109.52	-1.14586	58.9646	0	C1203	77.78	A6802	3.1	A6802	0.01
High	TTFDHQNSENV	19	1	1	Q9Y2D8		0	1.31162e+07	0	0.001131	31.86	0.109441	2	1291.55	-1.69511	31.5892	0		0	A6802	128.5	A6802	0.9
High	AAFDQWREW	1	1	1	Q16555		0	1.02879e+07	0	0.001745	31.81	0.179229	2	1208.55	-0.508221	70.8204	0	C1203	55.56	C1203	481.5	C1203	1.6
High	DTATAHSWFV	25	1	1	Q13425		0	50187610	0	0.0002365	31.8	0.185424	2	1134.52	-0.609727	63.2861	0	C1203	40	A6802	10.6	A6802	0.08
High	RKKDGQVTF	10	1	1	Q9BW60		0	4.5847e+06	0	0.001075	31.77	0.169046	2	1078.6	-0.482279	20.1361	0	C1203	40.74	B1503	13.9	B1503	0.4
High	SKLSFSQVF	7	1	1	Q9UJX4		0	3.10344e+07	0	0.000606	31.64	0.259937	2	1042.56	-0.469315	65.2955	0	C1203	37.04	B1503	4.2	B1503	0.04
High	GKFNVLLTTY	2	2	2	P51531;P51532		0	7.02756e+06	0	0.001555	31.64	0.192314	2	1155.64	0.14495	66.0042	0	C1203	37.14	B1503	34.5	B1503	0.9
High	KQTQIFTTY	4	2	2	P34931;P08107		0	1.04956e+07	0	0.0002256	31.53	0.302743	2	1129.59	-0.241437	46.3614	0	C1203	40.74	B1503	2.5	B1503	0.01
High	EIFSKNYRV	19	1	1	Q9NVU0		0	4.02821e+07	0	0.001699	31.37	0.2459	2	1155.62	-0.485799	42.7179	0	C1203	44.44	A6802	8.7	A6802	0.06
High	AQFETKKLY	26	1	1	O60613		0	34787845	0	0.0006205	31.27	0.248978	2	1127.61	-0.131873	35.5392	0	C1203	51.85	B1503	4.1	B1503	0.03
High	YAAGVHSVL	16	1	1	O43299		0	1.45526e+07	0	0.001712	31.19	0.397118	2	916.488	-0.295018	42.261	0	C1203	88.89	C1203	7.6	C1203	0.01
High	YTTDFIFNL	8	1	1	P08237		0	3.3863e+07	0	0.001574	30.95	0.322576	2	1133.55	-0.164298	98.1832	0	C1203	77.78	A6802	8.2	A6802	0.06
High	RQINWTVLY	25	1	1	P83731		0	1.24232e+08	0	0.001713	30.86	0.261241	2	1192.65	-0.0728668	68.6926	0	C1203	40.74	B1503	2.5	B1503	0.01
High	QVFEGHTHYV	24	1	1	P35606		0	1.42011e+08	0	0.0006509	30.73	0.295467	2	1216.57	-0.0499851	34.3443	0	C1203	37.14	A6802	5.1	A6802	0.02
High	KNFPWQVFF	15	1	1	P09871		0	1.03327e+07	0	0.0004082	30.65	0.279823	2	1212.62	-0.241399	90.1552	0	C1203	44.44	B1503	19.7	B1503	0.5
High	RQFEFSVDSF	6	3	3	Q96IP4;Q5VWP2;Q8NEK8		0	1.61921e+07	0	3.531e-07	30.62	0.278512	2	1261.58	-0.149792	71.062	0	C1203	40	B1503	2.7	B1503	0.01
High	RAFPLPMSF	7	1	1	Q9UHJ6		0	1.07617e+07	0	0.0005417	30.41	0.340308	2	1065.55	-0.191572	77.7113	0	C1203	81.48	B1503	2.7	B1503	0.01
High	YAFPKSITV	44	1	1	P53985		0	4.16515e+08	0	0.001444	30.34	0.258638	2	1025.57	-0.658887	61.2784	0	C1203	96.3	C1203	2.7	C1203	0.01
High	YAFPKAVSVFF	4	1	1	O15427		0	8.29148e+06	0	0.001633	30.33	0.40331	2	1275.68	-0.269518	86.0532	0		0	B1503	82.4	C1203	0.8
High	HKFPDEDSY	33	1	1	Q6VY07		0	4.40212e+07	0	3.104e-06	30.32	0.140181	2	1137.48	-0.297763	33.7459	0	C1203	48.15	B1503	55.7	B1503	1.3
High	YVTTSTRTY	11	1	1	P08670		0	1.32683e+07	0	1.95e-06	30.3	0.465554	2	1091.54	-0.765004	30.6578	0	C1203	48.15	B1503	34.5	C1203	0.17
High	LSFQEVREY	1	1	1	O00311		0	1.46069e+07	0	0.001655	30.25	0.346046	2	1170.58	-0.395095	58.4678	0	C1203	81.48	B1503	19.2	C1203	0.15
High	RTTEINFKV	16	2	2	P29762;P29373		0	2.21809e+07	0	0.001463	30.19	0.289216	2	1107.61	-1.06693	40.5858	0	C1203	70.37	A6802	74.6	A6802	0.6
High	EAAFFEGHFL	12	1	1	Q5W0V3		0	1.79267e+07	0	0.000575	29.78	0.300861	2	1167.55	-0.0588424	74.8427	0	C1203	60	A6802	27.9	A6802	0.3
High	KQLPESESF	6	1	1	Q8NI35		0	5.43487e+06	0	0.0006747	29.7	0.51224	2	1064.53	-0.673743	38.2237	0	C1203	37.04	B1503	4.6	B1503	0.04
High	RQFPVTVHF	13	1	1	Q8IY37		0	1.87362e+07	0	0.001698	29.4	0.483602	2	1130.61	-0.700941	52.8222	0	C1203	44.44	B1503	2.5	B1503	0.01
High	TTFEHDIQAL	36	1	1	Q01082		0	9.34571e+07	0	0.0002112	29.18	0.545509	2	1174.57	-0.641581	59.6716	0	C1203	57.14	A6802	138.6	A6802	1
High	KKYGPKGYGY	6	2	2	P21291;Q16527		0	1.98913e+06	0	0.00114	29.17	0.492592	2	1160.61	-0.719374	24.1499	0	C1203	42.86	B1503	53.5	B1503	1.2
High	KHQEHILRF	13	1	1	Q13263		0	1.00553e+07	0	0.0007652	29.15	0.323627	3	1207.67	-0.120583	25.7877	0	C1203	40.74	B1503	53.8	B1503	1.2
High	RAFEYEIRF	40	1	1	O60566		0	5.11331e+07	0	6.846e-06	29.13	0.452799	3	1230.63	-0.876261	59.1125	0	C1203	77.78	B1503	9.5	B1503	0.2
High	HQITVLHVY	9	1	1	Q9NYP7		0	24207740	0	1.652e-05	28.78	0.352341	2	1109.61	-0.609792	47.2892	0	C1203	40.74	B1503	3.8	B1503	0.03
High	SKYFERHGY	9	1	1	O95786		0	6.07866e+06	0	0.0002594	28.77	0.39563	2	1186.56	-0.299241	27.9536	0	C1203	40.74	B1503	21.9	B1503	0.6
High	EVMKYITSL	18	1	1	P11586		0	3.05419e+07	0	0.0004713	28.54	0.429603	2	1083.57	-0.46377	64.2654	0	C1203	40.74	A6802	16.6	A6802	0.15
High	EVAPSFGTL	26	1	1	Q5SRE5		0	1.0811e+08	0	0.001361	28.51	0.814992	2	920.473	0.108035	69.1476	0	C1203	51.85	A6802	10.3	A6802	0.08
High	YTTDFIYQL	22	1	1	Q01813		0	5.43496e+07	0	0.001259	28.35	0.56557	2	1163.56	-0.0997997	86.7625	0	C1203	77.78	A6802	7.7	A6802	0.05
High	HVFDHPWETV	24	1	1	Q9Y3B1		0	4.15316e+07	0	3.028e-07	28.03	0.567263	2	1266.59	0.0128374	54.6185	0	C1203	37.14	A6802	16.8	A6802	0.15
High	ESFEKAYQV	34	1	1	Q86V86		0	9.45527e+07	0	0.001277	27.98	0.529887	2	1100.53	-0.642618	45.737	0	C1203	74.07	A6802	6.1	A6802	0.03
High	WAYPRQVFI	16	1	1	Q9P2D0		0	42819512	0	0.0006419	27.98	0.473045	2	1179.63	-0.16649	72.6392	0	C1203	81.48	C1203	7.8	C1203	0.01
High	ETFNDFVRL	21	1	1	O43913		0	3.39142e+07	0	0.0009193	27.9	0.619045	2	1140.57	-0.466967	71.806	0	C1203	74.07	A6802	16	A6802	0.15
High	YTFPGILKW	4	1	1	Q9H7D0		0	5.39594e+06	0	0.001575	27.68	0.444776	2	1124.61	-0.210064	82.4409	0	C1203	51.85	C1203	45.2	C1203	0.2
High	FSQDHLVIY	16	1	1	Q9BW91		0	3.64511e+07	0	0.001296	27.66	0.782079	2	1121.56	-0.927514	59.1257	0	C1203	77.78	C1203	13.8	C1203	0.04
High	YAYDGKDYI	15	16	16	P01892;P30447;P05534;P10316;P01889;P30460;Q04826;P30479;P30480;P30486;P18464;P30490;P30498;Q31610;P30499;P04222		0	2.12926e+07	0	0.001353	27.64	0.456123	2	1107.5	-0.12478	51.1603	0	C1203	77.78	C1203	6	C1203	0.01
High	GKYFEPEAY	1	1	1	Q96NE9		0	4.47814e+06	0	0.001221	27.58	0.466746	2	1103.5	-0.65391	48.4807	0	C1203	44.44	B1503	14.1	B1503	0.4
High	ELYYRAIQF	8	1	1	Q00610		0	1.28036e+07	0	0.00142	27.43	0.901147	2	1202.62	-0.0435492	68.7809	0	C1203	37.04	B1503	144.6	B1503	2.5
High	KSFEGLFYF	2	1	1	Q00610		0	1.29502e+07	0	0.001704	27.12	0.799936	2	1137.56	0.00855888	82.2808	0	C1203	66.67	B1503	7.6	B1503	0.12
High	RAFDQGADAIY	1	1	1	Q9UDW1		0	9.77758e+06	0	1.949e-07	26.99	0.619757	2	1226.58	-0.859471	50.0813	0		0	B1503	65.2	B1503	1.4
High	FSFPGELLM	41	2	2	P43003;P48664		0	6.78716e+07	0	0.001461	26.97	0.752405	2	1040.51	-0.643041	98.7776	0	C1203	77.78	C1203	6.2	C1203	0.01
High	RKFYKGKKY	28	1	1	P42766		0	1.39567e+07	0	0.001728	26.77	0.38699	3	1217.72	0.045921	16.7578	0	C1203	44.44	B1503	20.2	B1503	0.5
High	VKYIQQENF	4	1	1	Q6PJF5		0	8.24555e+06	0	3.762e-06	26.68	0.864609	2	1168.6	0.0408558	46.1337	0	C1203	37.04	B1503	30.8	B1503	0.8
High	TVFEHTFHV	33	1	1	P41250		0	8.53083e+07	0	0.001502	26.43	0.721888	2	1116.55	-0.557829	48.5944	0	C1203	44.44	A6802	2.4	A6802	0.01
High	FAWPKILKI	15	2	2	Q9H4G0;O43491		0	3.34538e+07	0	0.001745	26.17	0.140942	2	1115.7	0.489752	73.5627	0	C1203	85.19	C1203	14	C1203	0.04
High	NQKPPSAEY	16	1	1	Q9UPN3		0	9.42077e+06	0	0.001708	25.96	1.08364	2	1033.49	-0.246537	26.6031	0	C1203	48.15	B1503	10.1	B1503	0.2
High	FAYPNRPDVL	34	1	1	Q03518		0	8.57665e+07	0	0.001731	25.84	1.08168	2	1191.61	-0.889279	58.5433	0	C1203	80	C1203	21.8	C1203	0.08
High	EAFHGKFYEA	37	1	1	Q13045		0	1.01103e+08	0	0.0009787	25.7	0.615554	2	1198.55	-0.415174	38.0706	0	C1203	42.86	A6802	26.5	A6802	0.25
High	RKYNELLKSY	18	1	1	P10909		0	1.53526e+07	0	0.0001424	25.6	0.852709	3	1313.72	-0.0352122	34.5444	0	C1203	34.29	B1503	15.3	B1503	0.4
High	DSFYVHHDI	8	1	1	Q13610		0	7.57482e+06	0	0.001534	25.24	0.602492	2	1132.5	-0.894441	43.0016	0	C1203	62.96	A6802	62.1	A6802	0.6
High	RAFGIPIRV	29	1	1	P06493		0	4.10436e+08	0	0.001612	25.12	0.454493	2	1028.64	-0.96995	53.5043	0	C1203	88.89	C1203	30	C1203	0.12
High	ELADIKQAYL	3	1	1	Q8WXX5		0	1.02608e+07	0	0.001626	25.12	1.09571	2	1163.63	-0.46127	60.3798	0	C1203	34.29	A6802	31.1	A6802	0.3
High	YTYPWVYNY	11	1	1	O00115		0	1.29772e+07	0	0.0003508	24.75	0.886821	2	1268.56	0.433908	84.7937	0	C1203	85.19	C1203	7.7	C1203	0.01
High	KQFQKVITEY	2	1	1	Q7KZF4		0	6.5558e+06	0	0.0007242	24.73	1.08542	2	1283.7	-0.524447	41.364	0	C1203	37.14	B1503	5	B1503	0.05
High	EAYDQRQDTV	5	1	1	Q99426		0	7.627e+06	0	0.0004098	24.06	0.854395	2	1224.55	-0.133523	30.8408	0	C1203	60	A6802	262.4	A6802	1.5
High	YGYEHILTL	8	1	1	Q96AX1		0	5.45831e+07	0	1.648e-05	23.42	2.14709	2	1108.57	-0.479214	68.239	0	C1203	59.26	C1203	5.3	C1203	0.01
High	YVFDGKPPQL	11	1	1	P39748		0	2.44764e+07	0	0.0009002	23.42	2.03562	2	1163.61	-0.3462	65.0767	0	C1203	57.14	C1203	243.1	C1203	1
High	YKEDHPFEY	2	1	1	Q9H0R8		0	7.41054e+06	0	0.001317	22.52	0.847473	2	1227.53	-0.428316	41.885	0	C1203	51.85	B1503	78.6	B1503	1.6
High	SKMFHPNVY	16	2	2	P49459;P63146		0	6.24649e+06	0	0.001154	22	2.33707	2	1122.54	0.19554	36.199	0	C1203	44.44	B1503	4.3	B1503	0.04
High	YKVPDGMVGF	4	1	1	Q96AE4		0	0	0	0.000164	21.7	2.51909	2	1112.54	0.0467063	65.5425	0	C1203	34.29	B1503	18.3	B1503	0.5
High	RKNPVTSTY	21	1	1	Q13131		0	2.65089e+07	0	0.0005676	21.49	2.49842	2	1065.57	-0.561641	23.2975	0	C1203	48.15	B1503	5.4	B1503	0.06
High	EDFFARNSYV	5	1	1	P11413		0	8.76682e+06	0	0.000252	21.1	1.89482	2	1247.57	-0.41696	62.3954	0	C1203	31.43	A6802	258.4	A6802	1.5
High	ETFPIPKAFV	4	2	2	Q13464;O75116		0	5.2255e+07	0	0.0005424	19.8	3.46914	2	1148.64	-0.0208383	73.1232	0	C1203	51.43	A6802	3.7	A6802	0.01
High	ETFEKTPVEV	6	1	1	Q15149		0	2.22399e+07	0	0.001045	19.37	4.80307	2	1178.59	-0.37998	50.7525	0	C1203	57.14	A6802	7.4	A6802	0.05
High	ETFWDKDQL	9	1	1	Q9UBG0		0	1.11803e+07	0	0.0009086	18.47	4.45616	2	1181.55	-0.284907	62.0826	0	C1203	70.37	A6802	65	A6802	0.6
High	ETFNTPAmYV	142	7	7	Q9BYX7;P60709;P63261;Q6S8J3;A5A3E0;P0CG38;P0CG39	M8(Oxidation)	0	375608880	0	0.00163	18.31	2.85844	2	1188.52	-0.18756	65.015	0	C1203	48.57	A6802	4.3	A6802	0.01
High	RKVYNISEF	12	1	1	O60427		0	1.44029e+07	0	0.001549	18.28	5.00686	2	1155.62	-0.0632696	42.1171	0	C1203	37.04	B1503	4.8	B1503	0.05
High	YGYRQSVTY	8	1	1	P08174		0	1.24748e+07	0	0.00104	17.84	5.58758	2	1136.54	-0.702853	41.0849	0	C1203	51.85	B1503	7.1	C1203	0.06
High	GAYGQAVRY	20	1	1	Q9UID3		0	1.81391e+07	0.001	0.002954	67.56	5.44405e-05	2	984.489	-0.545383	35.4719	0	C1203	85.19	B1503	41.5	C1203	0.5
High	TVARPSVPA	55	1	1	P08174		0	6.73969e+08	0.001	0.002151	61.42	0.00011855	2	897.515	-0.799245	31.2864	0	C1203	7.41	A6802	24.4	A6802	0.25
High	AMASIINRL	16	1	1	Q96N67		0	1.57385e+07	0.001	0.001745	58.77	0.00034499	2	988.561	-0.0948053	58.2711	0	C1203	51.85	B1503	126.7	C1203	1.8
High	NVIDNPWGV	15	1	1	Q5TGY1		0	1.32596e+07	0.001	0.001754	57.66	0.000638535	2	1013.5	-0.369011	78.0964	0	C1203	44.44	A6802	7.4	A6802	0.05
High	GQRKGAGSVF	29	1	1	P62917		0	3.38286e+07	0.001	0.003345	57.23	0.000639518	2	1006.54	-0.562657	22.384	0	C1203	42.86	B1503	9.8	B1503	0.2
High	ITGPLIRIL	12	1	1	Q92616		0	1.29375e+07	0.001	0.002324	56.13	4.35149e-05	2	995.661	-0.664122	73.9267	0	C1203	81.48	C1203	675.2	C1203	2
High	AAFDGHAREL	9	1	1	Q3MIP1		0	6.65476e+06	0.001	0.001745	55.44	0.000922287	2	1086.53	-0.542284	32.5997	0	C1203	82.86	C1203	368.1	C1203	1.4
High	AVAAVLTQV	7	1	1	Q99720		0	9.09793e+06	0.001	0.001745	53.4	0.00141903	2	871.525	-0.0981018	62.5475	0	C1203	44.44	A6802	23.4	A6802	0.25
High	DVATITKTV	11	1	1	P57740		0	7.74677e+06	0.001	0.001745	52.18	0.00110626	2	947.541	-0.141722	44.5437	0	C1203	48.15	A6802	20.2	A6802	0.2
High	NASPVISSV	23	1	1	Q96T58		0	8.0141e+07	0.001	0.002314	51.94	0.00365512	2	873.467	-0.306262	51.2386	0	C1203	88.89	A6802	8.5	A6802	0.06
High	VTTDIQVKV	46	1	1	O00267		0	2.62523e+08	0.001	0.001745	51.72	0.0017457	2	1002.58	-0.0368288	47.3089	0	C1203	77.78	A6802	34.4	A6802	0.4
High	DVAQIFNNI	8	1	1	Q9Y376		0	7.94552e+06	0.001	0.002953	51.61	0.00359995	2	1033.53	-0.386938	88.9883	0	C1203	33.33	A6802	14.2	A6802	0.12
High	YAAPGGLIGV	30	2	2	Q2VIR3;P41091		0	5.40723e+07	0.001	0.001747	51.21	0.00447515	2	917.509	-0.198983	70.4727	0	C1203	62.86	A6802	31.8	A6802	0.3
High	DVAPVSFFL	17	1	1	O14791		0	1.05144e+07	0.001	0.001768	50.74	0.00351333	2	994.524	-0.061008	104.25	0	C1203	48.15	A6802	4.7	A6802	0.01
High	EAINIIQGI	7	1	1	Q9NR81		0	3.3318e+07	0.001	0.001745	50.57	0.00218636	2	970.556	-0.514434	79.2744	0	C1203	70.37	A6802	10.2	A6802	0.08
High	ETIIDTKGV	22	1	1	Q9GZS1		0	2.61848e+07	0.001	0.003191	50.35	0.00260211	2	975.535	-0.498615	46.1404	0	C1203	70.37	A6802	10.4	A6802	0.08
High	LVASVRVPA	36	1	1	P42126		0	8.6446e+07	0.001	0.003393	50.33	0.000860561	2	911.567	-0.293012	44.0636	0	C1203	11.11	A6802	29.4	A6802	0.3
High	TASPVIKAV	41	1	1	Q8WU10		0	4.37999e+08	0.001	0.002006	49.94	0.00253326	2	885.541	0.0819921	36.1843	0	C1203	92.59	C1203	69.4	C1203	0.4
High	DIATILSKV	12	1	1	Q8NG31		0	1.04163e+07	0.001	0.003393	49.82	0.00163435	2	959.577	-0.0899343	77.2786	0	C1203	40.74	A6802	14.5	A6802	0.12
High	NAFSGVMmL	80	1	1	Q9NTX5	M8(Oxidation)	0	2.91664e+07	0.001	0.001775	49.8	0.00249478	2	985.448	-0.482857	79.2615	0	C1203	85.19	C1203	22.4	C1203	0.09
High	STADVIQHC	18	1	1	Q5SRE5		0	2.98048e+07	0.001	0.001747	49.79	0.00238928	2	973.441	-0.259881	34.8601	0	C1203	40.74	A6802	182.6	A6802	1.2
High	AAAPHTVSY	6	1	1	O75907		0	3.29212e+06	0.001	0.001745	49.74	0.0045483	2	916.452	-0.214194	30.1345	0	C1203	92.59	B1503	5.4	C1203	0.04
High	VAADIAVQL	1	1	1	P08240		0	7.27251e+06	0.001	0.003015	49.69	0.00290085	2	899.52	-0.0793936	71.0293	0	C1203	88.89	C1203	35.1	C1203	0.15
High	SAFPFPVTV	29	1	1	Q96K37		0	6.68422e+07	0.001	0.001961	49.54	0.00536077	2	964.513	-0.494552	90.0982	0	C1203	96.3	C1203	5.4	C1203	0.01
High	KAFQKIVVL	64	2	2	Q7L1Q6;Q9Y6E2		0	7.75354e+08	0.001	0.003198	49.49	0.000337944	2	1045.68	-1.12322	45.3739	0	C1203	88.89	C1203	36.9	C1203	0.17
High	SIAGIFKEV	33	1	1	Q9NQQ7		0	8.7134e+07	0.001	0.003705	49.22	0.00342627	2	963.551	-0.379385	63.8561	0	C1203	51.85	A6802	19.4	A6802	0.17
High	YTTDRVMTV	14	2	2	Q13547;Q92769		0	1.34708e+07	0.001	0.002983	49.2	0.00407568	2	1085.53	-0.358255	43.0284	0	C1203	81.48	C1203	6.7	C1203	0.01
High	DVSNVIEKV	60	1	1	O94955		0	9.6214e+08	0.001	0.003286	49.05	0.0051834	2	1002.55	-0.399072	53.2149	0	C1203	44.44	A6802	30.2	A6802	0.3
High	TTVDINTQV	45	1	1	Q14676		0	4.00819e+08	0.001	0.003393	48.59	0.00631183	2	990.51	-0.0725538	54.5882	0	C1203	70.37	A6802	3.9	A6802	0.01
High	NSSQVVVAV	52	1	1	Q16531		0	7.80114e+08	0.001	0.003408	48.35	0.00648256	2	902.493	-0.904753	49.3665	0	C1203	77.78	A6802	13.7	A6802	0.12
High	KAIDVVVMV	21	1	1	Q8TDR0		0	4.49614e+07	0.001	0.00185	48.03	0.00397352	2	973.575	-0.0107429	61.6342	0	C1203	85.19	C1203	46.5	C1203	0.25
High	KASPLTFTV	19	1	1	P09884		0	3.82334e+07	0.001	0.00351	47.97	0.00470705	2	963.551	-0.115631	55.5269	0	C1203	88.89	C1203	66.2	C1203	0.3
High	ITAPPTPGI	7	1	1	Q8NEZ4		0	1.71341e+07	0.001	0.002964	47.68	0.00268964	2	866.498	-0.521642	59.0133	0	C1203	70.37	A6802	34.3	A6802	0.4
High	ITVSIIKEL	27	1	1	Q8TED0		0	1.1305e+08	0.001	0.002962	47.67	0.00102515	2	1015.64	-0.303621	70.1434	0	C1203	81.48	C1203	140.7	C1203	0.7
High	LAFPGEMLL	37	1	1	P43007		0	3.70043e+07	0.001	0.003458	47.52	0.00805665	2	990.533	-0.416946	96.2306	0	C1203	85.19	C1203	18.4	C1203	0.07
High	DTFSVQVLV	187	1	1	Q96L33		0	1.3762e+08	0.001	0.003184	47.32	0.00684787	2	1007.54	-0.375596	91.1345	0	C1203	77.78	A6802	5.2	A6802	0.02
High	ELSDIAHRI	2	1	1	P04075		0	1.27953e+07	0.001	0.003332	47.25	0.00597023	2	1053.57	-0.934613	46.6688	0	C1203	37.04	A6802	57	A6802	0.5
High	MAYSNLLRA	1	1	1	P37108		0	7.2971e+06	0.001	0.003393	47.23	0.00502417	2	1038.54	-1.20876	55.9944	0	C1203	48.15	C1203	17.6	C1203	0.06
High	ISAPLVKTL	15	1	1	P30305		0	2.72137e+07	0.001	0.002835	47.18	0.00234975	2	941.603	-0.158732	53.8355	0	C1203	88.89	C1203	53.8	C1203	0.25
High	DVTQIVEIL	14	1	1	Q86XP3		0	1.89706e+07	0.001	0.002102	46.7	0.00699862	2	1029.58	-0.248878	99.4021	0	C1203	40.74	A6802	406.7	A6802	1.9
High	YKILGGSVL	13	1	1	Q15843		0	2.76685e+07	0.001	0.002612	46.03	0.00264427	2	949.572	-0.222767	60.6203	0	C1203	44.44	B1503	12.1	B1503	0.3
High	AAFAYTVKY	24	1	1	Q8N2K1		0	1.96506e+08	0.001	0.001745	45.99	0.0121919	2	1033.54	0.112903	54.1654	0	C1203	85.19	B1503	6.5	B1503	0.1
High	FMVSQVLF	14	1	1	P46597		0	2.32247e+07	0.001	0.003393	45.83	0.00828969	2	970.506	-0.252456	97.4305	0	C1203	36.67	B1503	43.4	B1503	1
High	AAASIANIV	20	1	1	P17987		0	2.62449e+07	0.001	0.003393	45.5	0.0137622	2	829.478	-0.0126563	65.1896	0	C1203	85.19	C1203	94.9	C1203	0.5
High	AQISWVTVF	12	1	1	Q9NZ01		0	6.67597e+06	0.001	0.001745	45.49	0.0122402	2	1050.56	0.150412	93.6804	0	C1203	44.44	B1503	1.9	B1503	0.01
High	TVSEVIQGL	8	1	1	Q8WWW0		0	1.8723e+07	0.001	0.003393	45.35	0.0116172	2	945.525	-0.180135	68.7368	0	C1203	48.15	A6802	19.2	A6802	0.17
High	FLYPFPLAL	6	1	1	Q5BJD5		0	8.0256e+07	0.001	0.001745	45.32	0.00595755	2	1080.61	-0.141404	107.325	0	C1203	59.26	C1203	4.7	C1203	0.01
High	AQAASQHVF	8	1	1	Q9NQT4		0	6.24433e+06	0.001	0.001745	45.3	0.00967111	2	958.474	-0.226139	29.4965	0	C1203	40.74	B1503	3	B1503	0.01
High	GKSTSIQSF	20	1	1	P13797		0	9.91793e+06	0.001	0.002357	45.07	0.00994971	2	954.489	-0.510509	32.1577	0	C1203	37.04	B1503	11.3	B1503	0.25
High	AAATRTTSF	7	1	1	Q9H3F6		0	2388838	0.001	0.003622	44.77	0.0123168	2	925.473	-0.60308	25.4859	0	C1203	74.07	B1503	12.7	B1503	0.3
High	SVADVVRFI	2	1	1	Q9UHJ3		0	9.39875e+06	0.001	0.001913	44.77	0.0101328	2	1005.57	-0.434619	74.028	0	C1203	44.44	A6802	12.3	A6802	0.1
High	DVIGQTITI	13	1	1	Q6UN15		0	8.95486e+06	0.001	0.003374	44.7	0.0113648	2	959.541	-0.267167	78.7345	0	C1203	40.74	A6802	70.8	A6802	0.6
High	EILNIFQGV	9	1	1	Q9H0H0		0	4.42477e+06	0.001	0.003396	44.65	0.0154246	2	1032.57	-0.744188	95.3838	0	C1203	37.04	A6802	11.8	A6802	0.1
High	MVAPFISQV	8	1	1	Q8N434		0	1.07393e+07	0.001	0.003282	44.58	0.0164137	2	991.528	-0.294162	78.6111	0	C1203	51.85	A6802	2.7	A6802	0.01
High	GKLHPSSSL	11	1	1	A5PLN9		0	2.76369e+06	0.001	0.003528	44.53	0.0104989	2	925.51	-0.342558	22.9345	0	C1203	37.04	B1503	84	B1503	1.7
High	YGFPSPIFL	2	1	1	Q76EJ3		0	1.90087e+07	0.001	0.002965	44.48	0.011852	2	1040.54	-1.37671	101.448	0	C1203	59.26	C1203	13.8	C1203	0.04
High	LSAGATRVY	1	2	2	P60891;P21108		0	2.38734e+06	0.001	0.003393	44.46	0.0116095	2	937.51	-0.0126562	38.0331	0	C1203	81.48	B1503	17.8	C1203	0.1
High	AAMPRPVSY	22	1	1	Q6TFL4		0	3.08019e+07	0.001	0.002449	44.31	0.0139858	2	991.502	-0.773004	41.9374	0	C1203	92.59	B1503	7.3	C1203	0.04
High	EIVQFFSGL	11	3	3	P31943;P55795;P52597		0	1.49782e+07	0.001	0.001745	44.31	0.0142786	2	1039.55	-0.0936313	96.6632	0	C1203	37.04	A6802	15.1	A6802	0.15
High	MAAMATARV	19	1	1	Q15904		0	8.03677e+06	0.001	0.003691	44.29	0.0166608	2	921.464	-0.216251	35.5993	0	C1203	77.78	A6802	4.2	A6802	0.01
High	TVADVDEKA	12	1	1	Q13118		0	6.38977e+06	0.001	0.003393	44.25	0.0149395	2	947.468	-0.586236	25.7375	0	C1203	7.41	A6802	97.2	A6802	0.8
High	NVTWVIVNL	10	1	1	O00505		0	1.04713e+07	0.001	0.001925	44.2	0.0138408	2	1057.6	-0.0470828	95.0008	0	C1203	44.44	A6802	22.4	A6802	0.25
High	SVALVIHNV	9	1	1	Q8WVV5		0	9.95933e+06	0.001	0.003076	43.94	0.00596386	2	951.562	-0.180737	51.2543	0	C1203	44.44	A6802	6.1	A6802	0.03
High	AMNPTNTVF	42	1	1	P11142		0	2.54645e+08	0.001	0.003393	43.94	0.0134999	2	994.465	-1.40774	59.1623	0	C1203	44.44	B1503	2.8	B1503	0.01
High	STIFPLDGV	15	1	1	O60318		0	7.74733e+06	0.001	0.003063	43.93	0.0190677	2	948.504	-0.205268	84.0814	0	C1203	66.67	A6802	3.5	A6802	0.01
High	LAKAWPTVL	25	1	1	P31040		0	3.49663e+07	0.001	0.002654	43.93	0.00734103	2	998.603	-0.795751	64.5269	0	C1203	81.48	C1203	35.2	C1203	0.15
High	HGIDPTGTY	28	3	3	P04350;P68371;P07437		0	2.99526e+07	0.001	0.003269	42.81	0.0181663	2	960.442	-0.418844	38.4358	0	C1203	44.44	B1503	42.3	C1203	0.4
High	GKVKSGGTY	8	1	1	P55017		0	1.26742e+07	0.001	0.003393	42.69	0.0178113	2	896.483	-0.422059	16.5578	0	C1203	40.74	B1503	21.1	B1503	0.6
High	NAFASVILF	28	1	1	P26641		0	4.04273e+07	0.001	0.001929	42.32	0.0191638	2	981.54	-0.112576	96.0195	0	C1203	77.78	B1503	16.9	C1203	0.2
High	FTAAIISRV	16	1	1	Q9Y570		0	3.63887e+07	0.001	0.003617	42.22	0.0105083	2	977.577	-0.46147	56.1491	0	C1203	77.78	A6802	2.5	A6802	0.01
High	LAAPVISVL	17	1	1	O60337		0	2.30423e+07	0.001	0.002773	42.13	0.00386393	2	882.566	0.0388271	85.0546	0	C1203	92.59	C1203	8.2	C1203	0.01
High	GQFGTINNF	3	1	1	Q14457		0	1.29243e+07	0.001	0.002253	42.1	0.0195615	2	997.474	0.235918	65.5356	0	C1203	40.74	B1503	3.6	B1503	0.03
High	AASSIQRVL	22	2	2	Q5BKT4;Q5I7T1		0	2.8104e+07	0.001	0.001756	42.05	0.0203618	2	944.552	-0.630869	39.2551	0	C1203	92.59	C1203	411.2	C1203	1.5
High	DVSNPQTVGV	7	1	1	O60493		0	7.96179e+07	0.001	0.002738	41.96	0.0227049	2	1015.5	-0.872536	51.987	0	C1203	28.57	A6802	45	A6802	0.4
High	DVAQIIIRI	40	1	1	Q7L622		0	1.40517e+08	0.001	0.003393	41.87	0.00647529	2	1040.65	-0.609063	78.6323	0	C1203	40.74	A6802	61.8	A6802	0.6
High	AQTDPTTGY	1	1	1	Q9Y4K0		0	6.60061e+06	0.001	0.003533	41.72	0.0202364	2	953.421	-0.0883435	37.8313	0	C1203	44.44	B1503	8.6	B1503	0.17
High	DVVNILVYV	10	1	1	Q15652		0	7.39801e+06	0.001	0.003412	41.65	0.0166703	2	1033.59	-0.275161	104.999	0	C1203	40.74	A6802	4.7	A6802	0.01
High	YAFPKAVSV	35	1	1	O15427		0	3.23868e+08	0.001	0.003365	41.25	0.0111509	2	981.542	1.51437	56.6887	0	C1203	92.59	C1203	2.7	C1203	0.01
High	TTIEAIHGL	50	1	1	Q92905		0	1.69798e+08	0.001	0.002778	41.23	0.0217418	2	954.525	-0.0765577	54.1814	0	C1203	74.07	A6802	4.6	A6802	0.01
High	STFGYVHGV	32	1	1	P38606		0	8.24554e+07	0.001	0.002806	41.23	0.0268986	2	966.467	-0.544741	47.7351	0	C1203	77.78	A6802	2.4	A6802	0.01
High	ISFPAPLYI	23	1	1	P86397		0	1.29903e+07	0.001	0.003625	41.08	0.0229738	2	1020.58	0.10228	95.777	0	C1203	77.78	C1203	8.2	C1203	0.01
High	YTVQFTTMV	13	1	1	Q7Z6Z7		0	1.39724e+07	0.001	0.0034	41.08	0.0301365	2	1089.53	-0.0471015	77.257	0	C1203	70.37	A6802	5.6	A6802	0.03
High	EVFGVIRSL	18	1	1	Q15393		0	3.74439e+07	0.001	0.002757	41.03	0.0202027	2	1019.59	-0.393302	68.4198	0	C1203	51.85	A6802	24.5	A6802	0.25
High	ETIRNYAQV	22	1	1	Q9Y6E2		0	3.93548e+07	0.001	0.00342	40.96	0.0328728	2	1093.56	-0.25532	41.408	0	C1203	66.67	A6802	5	A6802	0.02
High	AQIKFLNTY	6	1	1	Q8ND90		0	1.2491e+07	0.001	0.001859	40.96	0.0249202	2	1097.6	-0.514787	57.8423	0	C1203	44.44	B1503	2.9	B1503	0.01
High	GKVGFQSFF	14	1	1	P60903		0	2.24537e+07	0.001	0.003379	40.94	0.0276205	2	1016.52	-0.214763	67.6651	0	C1203	33.33	B1503	24.8	B1503	0.6
High	SSYGNIRAV	11	1	1	Q8N122		0	7.18159e+06	0.001	0.002832	40.92	0.0306769	2	966.5	-0.756283	37.0267	0	C1203	81.48	C1203	7.2	C1203	0.01
High	AAQEAVKLY	1	1	1	O60506		0	1.1105e+07	0.001	0.002447	40.68	0.0344763	2	992.541	-0.652258	44.2706	0	C1203	88.89	B1503	68.4	C1203	0.9
High	AAAPQLLIV	33	1	1	Q10589		0	1.10983e+08	0.001	0.003559	40.6	0.00571352	2	895.561	-0.450802	77.8115	0	C1203	92.59	C1203	97.7	C1203	0.5
High	EVAALIRSL	21	1	1	Q6P2Q9		0	6.9859e+07	0.001	0.003636	40.35	0.0225523	2	971.588	-0.412732	64.0693	0	C1203	48.15	A6802	24.8	A6802	0.25
High	VASDLVMKV	8	1	1	Q9NYU2		0	1.71718e+07	0.001	0.002443	40.3	0.0351417	2	961.538	-0.378168	51.2073	0	C1203	88.89	C1203	60.3	C1203	0.3
High	EVAGILEPVGL	9	1	1	O95229		0	2.09873e+07	0.001	0.00314	40.04	0.0170076	2	1096.62	-0.107459	87.288	0		0	A6802	41.9	A6802	0.4
High	VmAPRTLIL	94	8	8	P04222;P30504;Q9TNN7;Q29963;P30505;P30508;P30510;Q29960	M2(Oxidation)	0	1.64561e+08	0.001	0.003535	39.99	0.0180064	2	1029.61	-0.810369	57.6747	0	C1203	55.56	B1503	16.1	B1503	0.4
High	GKVTGDTVY	15	1	1	Q6UX04		0	1.43868e+07	0.001	0.003393	39.97	0.0285314	2	939.478	-0.350687	28.9149	0	C1203	40.74	B1503	16.6	B1503	0.4
High	EVIAEAVGV	22	1	1	O15226		0	3.47483e+07	0.001	0.003205	39.66	0.0388992	2	886.488	-0.340408	62.3184	0	C1203	40.74	A6802	4.9	A6802	0.02
High	KLAPPSSTL	4	1	1	Q7Z3B3		0	5.89325e+06	0.001	0.003307	39.61	0.0304831	2	913.533	-2.56665	38.8578	0	C1203	51.85	B1503	63	C1203	1.2
High	EIYSESHRV	14	1	1	Q96I51		0	1.03453e+07	0.001	0.001754	39.61	0.0416032	2	1119.54	-0.369108	26.3425	0	C1203	44.44	A6802	15.4	A6802	0.15
High	DLAPIGIRV	4	1	1	Q99714		0	5.59749e+06	0.001	0.003393	39.59	0.012688	2	953.578	-0.291552	67.8009	0	C1203	51.85	A6802	140	A6802	1
High	LSFPYSYEV	15	1	1	Q53EP0		0	1.65026e+07	0.001	0.00354	39.55	0.035782	2	1104.52	0.00595024	83.9733	0	C1203	81.48	A6802	16.5	C1203	0.06
High	ETFQNSVFV	28	1	1	O00767		0	1.51108e+08	0.001	0.00301	39.49	0.0414136	2	1070.51	-0.83082	69.9676	0	C1203	74.07	A6802	3.4	A6802	0.01
High	DLIHEIYTV	14	1	1	P18124		0	1.06043e+07	0.001	0.003634	39.46	0.0539476	2	1102.58	-0.00257748	79.1644	0	C1203	44.44	A6802	154.3	A6802	1.1
High	VAFPTEIKV	3	1	1	Q9BPX7		0	34023713	0.001	0.003393	39.28	0.0355277	2	1003.58	-0.414074	63.3004	0	C1203	92.59	C1203	206.8	C1203	0.9
High	GQKPGGSDF	27	2	2	P56211;O43768		0	1.16875e+08	0.001	0.001773	39.26	0.0165178	2	892.415	-1.60683	23.5135	0	C1203	37.04	B1503	11.1	B1503	0.25
High	TTISKVSQV	8	1	1	Q9UNX4		0	1.95952e+07	0.001	0.002997	39.21	0.0252315	2	962.551	-0.673534	31.1687	0	C1203	74.07	A6802	10.2	A6802	0.08
High	NTATIFHEL	53	1	1	Q9UHD2		0	7.1342e+08	0.001	0.003365	39.12	0.0621921	2	1045.53	-0.956705	56.4463	0	C1203	74.07	A6802	3.8	A6802	0.01
High	LmVGSLLETI	3	2	2	Q70Z44;A5X5Y0	M2(Oxidation)	0	3.31967e+06	0.001	0.00355	39.09	0.0237804	2	1091.6	-0.339265	105.46	0	C1203	14.29	B1503	479.4	B1503	5
High	ETISPSGQGV	15	1	1	P23610		0	4.10798e+07	0.001	0.002913	39.05	0.0540991	2	974.479	-0.0953335	44.0336	0	C1203	51.43	A6802	6.4	A6802	0.04
High	EVISGKQEGV	19	2	2	Q9Y227;Q9NQZ7		0	1.72268e+07	0.001	0.001745	38.94	0.0550783	2	1045.55	-1.22064	33.0999	0	C1203	28.57	A6802	35.8	A6802	0.4
High	AAYGRSPMV	12	1	1	Q04726		0	7.58221e+06	0.001	0.003358	38.8	0.0390072	2	951.471	-0.368087	35.0343	0	C1203	85.19	C1203	34.4	C1203	0.15
High	IKADHVSTY	6	1	1	P20036		0	2.85855e+06	0.001	0.003414	38.65	0.0694982	2	1033.53	-0.485697	25.1724	0	C1203	51.85	B1503	3.3	B1503	0.02
High	SGYYRVSSY	5	1	1	Q9UNQ0		0	1.09141e+07	0.001	0.002763	38.5	0.0445656	2	1081.49	-1.11083	40.2213	0	C1203	44.44	C1203	23	C1203	0.09
High	AAYYHPSYL	25	1	1	Q14687		0	4.10622e+07	0.001	0.003043	37.91	0.0450069	2	1084.51	-0.345121	50.2722	0	C1203	85.19	C1203	6.4	C1203	0.01
High	KTPDFILQV	22	1	1	Q9Y2V0		0	3.76505e+07	0.001	0.001753	37.83	0.0599601	2	1060.6	0.264194	67.976	0	C1203	77.78	A6802	174.3	C1203	0.9
High	YTYGQGTYGA	5	1	1	Q92841		0	1.14551e+07	0.001	0.003647	37.73	0.0305772	2	1080.46	-0.195292	47.0977	0	C1203	25.71	A6802	9.4	A6802	0.07
High	AAYQSVRIL	21	1	1	Q9HAT2		0	4.82019e+07	0.001	0.003394	37.64	0.0432964	2	1020.58	-0.862281	51.1342	0	C1203	88.89	C1203	33	C1203	0.15
High	DTSPVFQRL	10	1	1	Q9NU22		0	1.65942e+07	0.001	0.003415	37.57	0.0810179	2	1062.56	-1.00795	56.0313	0	C1203	77.78	A6802	39.1	A6802	0.4
High	LKPGMVVTF	25	2	2	P68104;Q5VTE0		0	3.16861e+07	0.001	0.003666	37.52	0.0447218	2	991.564	-0.491973	62.6343	0	C1203	44.44	B1503	58.1	B1503	1.3
High	GKYIPKQSF	27	1	1	Q9P0I2		0	2.57957e+07	0.001	0.003379	37.43	0.0445197	2	1067.59	-1.95768	32.0471	0	C1203	33.33	B1503	17.8	B1503	0.5
High	AAIGLVIYY	14	1	1	P51571		0	8.97364e+07	0.001	0.003423	37.42	0.0351672	2	982.56	-0.479326	89.6118	0	C1203	88.89	B1503	61.6	C1203	0.6
High	QAFPLIIKL	25	1	1	Q14CZ7		0	3.0417e+07	0.001	0.001938	37.42	0.0144907	2	1042.67	0.195647	83.682	0	C1203	92.59	C1203	130.7	C1203	0.6
High	KAADIASKV	7	1	1	O95671		0	1.9824e+06	0.001	0.00232	37.36	0.0585488	2	902.53	-0.389238	25.9062	0	C1203	81.48	C1203	60.3	C1203	0.3
High	KKNPSSPLY	4	1	1	O95478		0	3.73668e+06	0.001	0.002666	37.34	0.074474	2	1033.57	-0.380197	25.6796	0	C1203	44.44	B1503	9.4	B1503	0.17
High	NTIPLFVQL	25	2	2	P35222;P14923		0	1.30428e+08	0.001	0.003218	37.29	0.0654819	2	1044.61	-0.73853	94.4539	0	C1203	77.78	A6802	11.3	A6802	0.09
High	MTPEIIQKL	53	1	1	Q9UMS4		0	4.18675e+08	0.001	0.003151	37.09	0.0695354	2	1072.61	-0.955243	61.8069	0	C1203	74.07	A6802	29.6	A6802	0.3
High	HTVGFILQL	33	1	1	Q5SRE5		0	2.20109e+08	0.001	0.003393	37.04	0.0495527	2	1027.59	-0.216022	75.6449	0	C1203	77.78	A6802	18.5	A6802	0.17
High	EVLQILTQV	6	1	1	Q9Y6V7		0	8.90189e+06	0.001	0.003394	36.93	0.0441325	2	1042.61	0.209331	85.5498	0	C1203	37.04	A6802	16.5	A6802	0.15
High	KLYQSIIGY	14	1	1	Q9NSV4		0	2.61165e+07	0.001	0.003393	36.93	0.0565419	2	1084.6	-0.952025	58.7312	0	C1203	48.15	B1503	7.6	B1503	0.12
High	GKAPLNVQF	12	1	1	O75369		0	1.9866e+07	0.001	0.003266	36.76	0.0854522	2	973.546	-0.474716	51.754	0	C1203	44.44	B1503	34.9	B1503	0.9
High	TVFNFPVSI	9	1	1	P28562		0	8.65953e+06	0.001	0.003393	36.76	0.0847669	2	1023.55	-0.0492217	93.921	0	C1203	40.74	C1203	13.1	C1203	0.04
High	VKNPDGGSY	19	1	1	Q15646		0	8.08943e+06	0.001	0.002742	36.62	0.0879033	2	936.442	-0.179546	23.8104	0	C1203	48.15	B1503	21.6	B1503	0.6
High	GKAPGAEEY	22	1	1	P09543		0	2.54781e+07	0.001	0.003695	36.49	0.116558	2	921.431	-0.353253	24.2208	0	C1203	51.85	B1503	62.4	B1503	1.4
High	GKTTQITQY	11	1	1	Q14562		0	6.76694e+06	0.001	0.00238	36.25	0.078279	2	1039.54	-0.307631	29.7466	0	C1203	40.74	B1503	147.4	B1503	2.5
High	KKKSPASTF	4	1	1	Q86U70		0	799326	0.001	0.003513	36.05	0.0511898	2	993.573	-0.122654	17.8465	0	C1203	37.04	B1503	7.4	B1503	0.12
High	TVFNFQEKV	18	1	1	Q14204		0	2.2646e+07	0.001	0.00177	36.05	0.0951412	2	1111.58	-0.646876	59.5754	0	C1203	40.74	A6802	12.3	A6802	0.1
High	KAYHEQLTV	31	1	1	Q9BQE3		0	35098985	0.001	0.003327	35.96	0.125261	2	1088.57	-0.315628	29.6013	0	C1203	85.19	C1203	45.5	C1203	0.2
High	EVFDEKIEV	3	1	1	Q02952		0	22813237	0.001	0.003393	35.8	0.104027	2	1107.56	-0.624219	59.8229	0	C1203	51.85	A6802	10.1	A6802	0.08
High	GKITDFIKF	1	1	1	P62701		0	1.24044e+07	0.001	0.002608	35.76	0.0612816	2	1068.61	-0.502835	64.8938	0	C1203	33.33	B1503	26.5	B1503	0.7
High	KKVGIVGKY	6	1	1	P61513		0	2.28749e+06	0.001	0.0032	35.51	0.008506	2	991.629	-0.544765	22.6257	0	C1203	44.44	B1503	46.2	B1503	1.1
High	LAAYHPWVV	29	1	1	Q5TA50		0	7.91291e+07	0.001	0.003393	35.49	0.0542801	2	1055.57	0.228485	64.2695	0	C1203	85.19	C1203	54.8	C1203	0.25
High	YTSGPGSRI	26	1	1	P05787		0	5.47833e+07	0.001	0.001745	35.43	0.114137	2	937.473	-0.454482	27.6833	0	C1203	70.37	A6802	79.7	C1203	0.4
High	TSSKVIQSV	19	1	1	O14976		0	1.32084e+07	0.001	0.003328	35.41	0.0713019	2	948.536	-0.464089	29.1258	0	C1203	74.07	A6802	72.9	A6802	0.6
High	AKKEKEPEY	3	1	1	O95793		0	365962	0.001	0.003393	35.34	0.133517	2	1121.58	-0.520531	17.05	0	C1203	48.15	B1503	226.2	B1503	3.5
High	FSKDIFSVI	49	1	1	Q01650		0	3.91243e+08	0.001	0.003393	35.26	0.0820283	2	1055.58	-1.06472	75.6885	0	C1203	70.37	C1203	14.4	C1203	0.05
High	ETSGIGEARV	30	1	1	P61764		0	3.34995e+08	0.001	0.003393	35.24	0.137061	2	1018.52	-1.03472	33.2082	0	C1203	42.86	A6802	10.9	A6802	0.08
High	SSFPTVVIY	42	1	1	Q9HCN4		0	3.80094e+08	0.001	0.003821	35.21	0.0909175	2	1012.53	-0.643873	83.0122	0	C1203	85.19	B1503	15.2	C1203	0.06
High	AAISHGRVF	8	1	1	Q9NRX2		0	6.9089e+06	0.001	0.002774	35.09	0.114852	2	957.526	-0.557436	29.0059	0	C1203	81.48	B1503	6.2	B1503	0.09
High	NSYPHQLYT	11	1	1	Q8IZD2		0	1.19597e+07	0.001	0.003418	35.02	0.0885462	2	1122.52	-2.32056	39.5079	0	C1203	44.44	C1203	340.4	C1203	1.3
High	TTFESSHYL	21	1	1	Q16531		0	3.9442e+07	0.001	0.002831	34.99	0.105372	2	1084.49	-1.15037	47.1738	0	C1203	74.07	A6802	4.6	A6802	0.01
High	AAAGLHSNV	8	1	1	Q9UJX3		0	2.97462e+06	0.001	0.003403	34.97	0.132112	2	839.437	-0.112043	24.0503	0	C1203	85.19	A6802	163.7	A6802	1.1
High	NSYVSPRIL	32	1	1	Q9H992		0	5.92266e+07	0.001	0.003393	34.97	0.115125	2	1048.58	-0.641671	51.0006	0	C1203	77.78	C1203	143.8	C1203	0.7
High	KAFARPWSL	4	1	1	Q8NAF0		0	1.30183e+07	0.001	0.00361	34.96	0.092762	2	1075.6	-0.791988	47.9751	0	C1203	81.48	C1203	29	C1203	0.12
High	GKFPSLLTH	44	1	1	P62906		0	2.0571e+08	0.001	0.00368	34.93	0.0963937	2	999.561	-0.782677	48.0034	0	C1203	18.52	B1503	112.8	B1503	2
High	DLMAPQPGV	15	1	1	Q96B49		0	1.74925e+07	0.001	0.003343	34.91	0.107105	2	927.461	0.0717579	63.5773	0	C1203	37.04	A6802	189.8	A6802	1.2
High	FSFPGELL	4	2	2	P43003;P48664		0	9.97242e+06	0.001	0.001745	34.76	0.147447	2	909.472	0.375121	93.9459	0	C1203	80	C1203	525.4	C1203	1.7
High	STYEGKPIFL	1	1	1	Q9NU02		0	1.23775e+07	0.001	0.002747	34.76	0.115698	2	1154.61	-0.794498	58.5444	0	C1203	60	A6802	177.9	A6802	1.2
High	IKKEFDKKY	8	2	2	P63167;Q96FJ2		0	2.60948e+06	0.001	0.003393	34.44	0.0891279	3	1198.68	-0.0022642	19.8734	0	C1203	44.44	B1503	197	B1503	3
High	TASKVIVAV	30	1	1	Q8TEM1		0	1.16027e+08	0.001	0.003393	34.43	0.0505892	2	887.556	-0.0838966	42.6826	0	C1203	85.19	A6802	18.4	A6802	0.17
High	LKSVNELIY	14	1	1	P18124		0	4.06234e+07	0.001	0.003416	34.41	0.0693695	2	1078.61	-0.806944	56.5026	0	C1203	44.44	B1503	15.1	B1503	0.4
High	EVSPVSRQSI	22	1	1	Q9H6S3		0	3.71477e+07	0.001	0.003531	34.4	0.156922	2	1101.59	-0.572176	37.3272	0	C1203	20	A6802	63.6	A6802	0.6
High	EVYVGDERV	16	1	1	O14976		0	2.13939e+07	0.001	0.003393	34.35	0.160961	2	1065.52	-0.110376	44.0464	0	C1203	40.74	A6802	22.5	A6802	0.25
High	EVHVQEETV	11	1	1	Q53GL7		0	1.46639e+07	0.001	0.002076	34.25	0.117825	2	1069.52	-0.601059	33.8234	0	C1203	40.74	A6802	238.3	A6802	1.4
High	GKKKYETEF	17	1	1	Q96QD8		0	1.24652e+07	0.001	0.001996	34.2	0.163481	2	1129.59	-0.367209	23.2755	0	C1203	33.33	B1503	132.8	B1503	2.5
High	DVYSGTPTKV	28	1	1	Q14493		0	6.24725e+07	0.001	0.0033	34.18	0.151231	2	1066.54	-0.228717	40.2641	0	C1203	40	A6802	108.4	A6802	0.8
High	GQTTTYLTY	4	1	1	P11388		0	1.83214e+07	0.001	0.003063	34.17	0.136209	2	1047.5	-0.938126	56.7922	0	C1203	44.44	B1503	3.8	B1503	0.03
High	HNAGISFSV	30	1	1	P40692		0	7.96079e+07	0.001	0.003345	34.16	0.15425	2	931.463	-0.521955	50.494	0	C1203	44.44	A6802	23	A6802	0.25
High	ETIETINQL	2	1	1	Q96GM5		0	2.10663e+07	0.001	0.003566	34.12	0.205111	2	1060.55	-1.33376	63.9197	0	C1203	74.07	A6802	9.4	A6802	0.07
High	GKAFSQSSY	17	3	3	Q9UNY5;Q8NF99;Q9NQZ8		0	1.09672e+07	0.001	0.003463	34.02	0.14159	2	974.457	-0.50111	28.8208	0	C1203	40.74	B1503	14.1	B1503	0.4
High	TAQTLVRIL	16	1	1	Q12905		0	1.65637e+07	0.001	0.003654	33.91	0.0566785	2	1014.63	-0.710494	57.8652	0	C1203	81.48	C1203	596.3	C1203	1.9
High	RAYPAAITI	21	1	1	O95071		0	1.17596e+08	0.001	0.001745	33.86	0.123962	2	975.562	-0.426547	55.0833	0	C1203	85.19	C1203	9.5	C1203	0.02
High	NLYGSPREY	46	1	1	Q9NZM1		0	2.45731e+08	0.001	0.002661	33.74	0.14096	2	1098.52	-1.05599	40.3857	0	C1203	55.56	B1503	39.1	B1503	1
High	EIFADPRTV	20	1	1	Q92871		0	5.91319e+07	0.001	0.003415	33.73	0.219341	2	1047.55	-0.764762	53.1155	0	C1203	51.85	A6802	96.6	A6802	0.8
High	MARETWEVL	13	1	1	Q86X10		0	1.22941e+07	0.001	0.003114	33.73	0.17846	2	1134.56	-0.704146	59.9645	0	C1203	81.48	C1203	56	C1203	0.25
High	ELAEIVFKV	2	1	1	Q9Y2R5		0	9374648	0.001	0.001773	33.53	0.0909841	2	1047.61	-0.0813889	73.5131	0	C1203	48.15	A6802	7.2	A6802	0.04
High	YASDVQLIL	14	1	1	Q8NHQ8		0	8.15611e+07	0.001	0.003393	33.41	0.142603	2	1021.56	-0.564368	79.7859	0	C1203	88.89	C1203	14.4	C1203	0.05
High	AAATSVHVV	15	1	1	Q68EM7		0	9.06228e+06	0.001	0.00366	33.39	0.137076	2	854.473	-0.0845848	30.6648	0	C1203	88.89	C1203	118.5	C1203	0.6
High	KASEWVQQV	20	1	1	P49588		0	2.00748e+07	0.001	0.003799	33.36	0.216704	2	1074.56	-1.5647	42.2422	0	C1203	85.19	C1203	99.9	C1203	0.5
High	GKTSLITRF	11	2	2	P20340;Q9NRW1		0	6.43255e+06	0.001	0.001745	33.09	0.0822271	2	1022.6	-0.656063	37.849	0	C1203	37.04	B1503	55.1	B1503	1.2
High	RQPDSPTALY	15	1	1	Q9BQG0		0	3.38903e+07	0.001	0.003087	33.08	0.231062	2	1147.57	-0.837867	42.3109	0	C1203	34.29	B1503	14	B1503	0.4
High	RQIDQFLVV	8	2	2	O94776;Q9BTC8		0	4.03896e+07	0.001	0.002805	33.03	0.140013	2	1117.64	-0.282116	66.5683	0	C1203	48.15	B1503	8.7	B1503	0.17
High	AKFGSKEEY	7	1	1	Q5VWQ8		0	3.03106e+06	0.001	0.002074	32.97	0.186699	2	1058.52	-0.263627	23.7272	0	C1203	51.85	B1503	22	B1503	0.6
High	NSYGSHRTL	9	1	1	Q9Y446		0	4.88149e+06	0.001	0.003174	32.94	0.213046	2	1034.5	-0.364561	21.6917	0	C1203	81.48	C1203	59.7	C1203	0.3
High	ETYFESARV	16	1	1	Q9H3L0		0	1.8304e+07	0.001	0.001811	32.91	0.161973	2	1101.52	-0.31933	48.0484	0	C1203	70.37	A6802	4.3	A6802	0.01
High	HTINGHNAEV	47	1	1	P22626		0	2.27662e+08	0.001	0.00291	32.83	0.200947	2	1091.52	-0.900683	23.8091	0	C1203	45.71	A6802	16.9	A6802	0.15
High	KEYERAIIF	3	1	1	P27105		0	6.59124e+06	0.001	0.001745	32.65	0.163464	2	1168.64	-0.292233	46.8968	0	C1203	40.74	B1503	5	B1503	0.05
High	ETFSSYISV	25	1	1	A5PLN9		0	1.00838e+08	0.001	0.003393	32.49	0.19778	2	1032.49	-0.108913	76.1885	0	C1203	77.78	A6802	3	A6802	0.01
High	HVGDIIKEV	29	2	2	Q14168;Q9NZW5		0	8.52519e+07	0.001	0.00343	32.42	0.134435	2	1009.57	-0.650873	43.149	0	C1203	51.85	A6802	232.4	A6802	1.4
High	RTFPWIIEV	16	1	1	P28749		0	2.04066e+07	0.001	0.001764	32.4	0.172172	2	1160.65	-0.125393	84.0182	0	C1203	88.89	C1203	16.2	C1203	0.06
High	AMRIGAEVY	19	2	2	P06733;P13929		0	1.43996e+07	0.001	0.003319	32.39	0.188631	2	1009.51	-0.104968	47.6403	0	C1203	44.44	B1503	7.4	B1503	0.12
High	MASRVLAAL	1	1	1	Q8N511		0	6.09362e+06	0.001	0.002383	32.36	0.124458	2	931.539	-0.5199	54.9977	0	C1203	77.78	C1203	13.1	C1203	0.04
High	LQQPRSLTY	8	1	1	P22102		0	1.25043e+07	0.001	0.003393	32.3	0.218049	2	1105.6	-0.58653	42.6173	0	C1203	51.85	B1503	2.4	B1503	0.01
High	LSADIFQQV	14	1	1	O94916		0	7.02194e+07	0.001	0.002039	32.28	0.315657	2	1020.54	-0.381339	77.6026	0	C1203	74.07	A6802	15.5	A6802	0.15
High	KAYHEQLSV	18	6	6	Q71U36;P68363;Q13748;Q6PEY2;P68366;Q9NY65		0	2.22813e+07	0.001	0.001754	32.27	0.281254	2	1074.56	-0.41008	28.8153	0	C1203	81.48	C1203	48.2	C1203	0.25
High	TTHFVEGGDA	19	1	1	P18124		0	1.49097e+07	0.001	0.003523	32.2	0.138649	2	1033.46	-0.607629	31.6554	0	C1203	20	A6802	466.7	A6802	2.5
High	GQNKKVMIY	26	2	2	Q14839;Q8TDI0		0	4.41736e+07	0.001	0.003454	32.03	0.15045	2	1080.59	-0.553329	26.5943	0	C1203	40.74	B1503	9.1	B1503	0.17
High	EVVGLIFRL	10	1	1	Q8NBU5		0	2.1e+07	0.001	0.003164	31.98	0.0681093	2	1045.64	-0.419889	85.6009	0	C1203	44.44	A6802	12.4	A6802	0.1
High	RKKAYADFY	3	1	1	P09669		0	8.11094e+06	0.001	0.001745	31.95	0.269443	2	1161.6	-0.316263	28.9124	0	C1203	37.04	B1503	32.7	B1503	0.8
High	FKVGDPEEY	5	1	1	Q8WYP3		0	1.00703e+07	0.001	0.001745	31.91	0.214186	2	1083.5	-1.61985	49.0246	0	C1203	51.85	B1503	131	B1503	2.5
High	EGAAVFWNV	9	1	1	Q9NWS8		0	19766422	0.001	0.003393	31.68	0.277285	2	992.483	-0.278391	82.2775	0	C1203	40.74	A6802	7.7	A6802	0.05
High	YTFFTPNNI	35	1	1	P17844		0	5.93842e+08	0.001	0.001745	31.57	0.230932	2	1116.54	-0.439968	80.6009	0	C1203	70.37	A6802	11.5	C1203	0.04
High	GKIIKPLQY	10	1	1	Q13823		0	1.00699e+07	0.001	0.003393	31.52	0.0584543	2	1059.66	-0.879847	37.1865	0	C1203	44.44	B1503	92.9	B1503	1.8
High	HSAGYILGSVNV	1	1	1	Q13115		0	6.7408e+06	0.001	0.001745	31.47	0.304566	2	1216.63	0.222349	60.2707	0		0	A6802	269.6	A6802	1.5
High	GKVTSIMQF	6	1	1	Q14562		0	1.45298e+07	0.001	0.00325	31.44	0.242507	2	1010.53	-0.843759	58.4741	0	C1203	33.33	B1503	13.5	B1503	0.3
High	AAFPYGGVL	2	1	1	Q6PCD5		0	8.35332e+06	0.001	0.003798	31.36	0.392658	2	894.472	-0.465173	79.7075	0	C1203	92.59	C1203	22.1	C1203	0.09
High	EVSFVIHNL	38	2	2	P49903;Q99611		0	3.03047e+08	0.001	0.002211	31.32	0.307263	2	1057.57	-0.611876	64.9333	0	C1203	44.44	A6802	6.3	A6802	0.04
High	MTNDKTAKV	13	1	1	P46013		0	5.81207e+06	0.001	0.003393	31.19	0.392252	2	1007.52	-0.455588	17.686	0	C1203	70.37	A6802	7.4	A6802	0.05
High	TSVPELQIPL	10	1	1	Q96R09		0	2.09873e+07	0.001	0.003284	31.19	0.128875	2	1096.62	-0.31185	87.3144	0	C1203	54.29	A6802	364.9	A6802	1.8
High	RQADFVQVL	19	1	1	Q9Y2V7		0	1.00285e+08	0.001	0.003081	31.15	0.270073	2	1075.59	-0.223415	56.9302	0	C1203	51.85	B1503	4.2	B1503	0.03
High	EVDEQMLNV	13	4	4	Q13885;Q9BVA1;P68371;P07437		0	2.04025e+07	0.001	0.003745	31.13	0.209878	2	1076.49	-0.287963	64.5235	0	C1203	44.44	A6802	186.4	A6802	1.2
High	FSYAFPKAV	1	2	2	O60669;O15427		0	7.1816e+06	0.001	0.001745	31.03	0.291957	2	1029.54	0.0209532	61.7329	0	C1203	81.48	C1203	3.4	C1203	0.01
High	YTTTIEAFI	26	1	1	P07814		0	6.4322e+07	0.001	0.003393	30.86	0.293153	2	1058.54	-0.0268557	83.4797	0	C1203	62.96	A6802	6	A6802	0.03
High	AMYSRKAMY	7	1	1	Q02878		0	3.11292e+06	0.001	0.00189	30.79	0.306378	2	1120.53	-0.183673	29.8311	0	C1203	48.15	B1503	10.5	B1503	0.25
High	ETTKNVQQTV	4	1	1	O75586		0	8.22404e+06	0.001	0.001745	30.73	0.385489	2	1147.6	-0.209941	24.9699	0	C1203	42.86	A6802	82	A6802	0.7
High	RKAPPNYAM	11	1	1	Q92541		0	5.41661e+06	0.001	0.002438	30.69	0.350155	2	1047.54	-0.707228	24.9613	0	C1203	40.74	B1503	18.7	B1503	0.5
High	EVAPAGSQV	20	1	1	O75147		0	2.67518e+07	0.001	0.002894	30.64	0.349032	2	857.436	-0.122971	33.8514	0	C1203	48.15	A6802	8.1	A6802	0.05
High	DASEIQVQV	24	1	1	P18858		0	3.09936e+07	0.001	0.003764	30.64	0.352527	2	988.494	-0.428001	64.0439	0	C1203	85.19	A6802	33.3	A6802	0.4
High	FTAKVWDAV	15	1	1	Q9Y3F4		0	2.0971e+07	0.001	0.003328	30.58	0.404942	2	1036.55	-0.775214	59.4082	0	C1203	74.07	A6802	3.4	A6802	0.01
High	EVYEKPVQV	40	1	1	Q9Y508		0	1.96525e+08	0.001	0.002243	30.53	0.430343	2	1090.58	-0.347571	40.19	0	C1203	51.85	A6802	15.2	A6802	0.15
High	EIAQMMVYV	16	1	1	Q9H497		0	1.64005e+07	0.001	0.003506	30.52	0.286818	2	1083.52	-0.302355	82.5181	0	C1203	44.44	A6802	4.8	A6802	0.02
High	EVADFLIKA	26	2	2	Q8IWZ3;O75179		0	1.32818e+08	0.001	0.003393	30.5	0.324861	2	1005.56	0.0504906	64.5142	0	C1203	11.11	A6802	5.8	A6802	0.03
High	QAYPEVRIV	34	1	1	Q08211		0	8.39378e+07	0.001	0.003	30.44	0.353056	2	1074.59	-0.0907229	56.469	0	C1203	92.59	C1203	79.9	C1203	0.4
High	KKFASFNAY	6	1	1	Q969S3		0	5.21011e+06	0.001	0.003424	30.41	0.490489	2	1075.56	0.940691	36.3939	0	C1203	40.74	B1503	2.9	B1503	0.01
High	EVFEKATFI	43	1	1	P19338		0	3.3474e+08	0.001	0.002411	30.36	0.278114	2	1083.57	-0.967892	60.6433	0	C1203	37.04	A6802	8.9	A6802	0.06
High	GKYGTLQEF	11	1	1	O75182		0	2.70105e+07	0.001	0.003515	30.35	0.35436	2	1042.52	-0.105542	47.9076	0	C1203	40.74	B1503	7.4	B1503	0.12
High	NTCPYVHNI	83	1	1	Q9Y2Y1		0	3.323e+08	0.001	0.003402	30.27	0.243388	2	1060.49	0.022073	44.7877	0	C1203	70.37	A6802	42.1	A6802	0.4
High	FSVVPSPKV	8	4	4	Q13509;P04350;P68371;P07437		0	3.89403e+07	0.001	0.00271	30.25	0.415764	2	959.557	0.68569	56.2381	0	C1203	70.37	A6802	122.4	C1203	0.8
High	HKVETFSGVY	11	1	1	P62081		0	7.432e+06	0.001	0.002935	30.21	0.390408	2	1166.58	-0.251561	37.2816	0	C1203	34.29	B1503	11.8	B1503	0.25
High	AQKPFGATY	5	1	1	Q96QD5		0	1.35654e+07	0.001	0.002492	30.17	0.384356	2	982.499	0.148547	36.4185	0	C1203	51.85	B1503	2.7	B1503	0.01
High	HAAHIISEL	23	1	1	Q96I24		0	6.25815e+07	0.001	0.003393	30.17	0.395559	2	990.536	-0.566248	36.6982	0	C1203	85.19	C1203	13.2	C1203	0.04
High	VKVDLSEKY	2	1	1	P43243		0	2.75309e+06	0.001	0.003311	30.04	0.218429	2	1080.59	-1.05171	38.2996	0	C1203	44.44	B1503	104.6	B1503	1.9
High	YLGEFSITY	2	1	1	P62841		0	1.00626e+07	0.001	0.001745	29.86	0.402467	2	1092.52	-0.440914	84.6065	0	C1203	51.85	B1503	9.3	B1503	0.17
High	DTTKWEWLV	13	1	1	Q9BWJ5		0	1.97534e+07	0.001	0.002099	29.85	0.457792	2	1177.59	-0.15341	84.3674	0	C1203	66.67	A6802	76.2	A6802	0.7
High	EIFPVSFHV	17	1	1	Q5THK1		0	2.70683e+07	0.001	0.00293	29.65	0.443001	2	1074.56	-0.0801472	77.1071	0	C1203	48.15	A6802	2.7	A6802	0.01
High	EVIDFSHGL	68	3	3	Q96GS6;Q5VST6;Q6PCB6		0	1.51931e+09	0.001	0.003527	29.62	0.487983	2	1016.5	-0.633884	67.1632	0	C1203	40.74	A6802	3.3	A6802	0.01
High	ETYPDPVRV	106	1	1	P49588		0	2.00073e+09	0.001	0.003424	29.58	0.584862	2	1075.54	-0.656419	51.2692	0	C1203	85.19	A6802	9.8	A6802	0.07
High	FKWSGENSY	7	1	1	Q8NI08		0	9.10434e+06	0.001	0.003451	29.38	0.214888	2	1117.49	-0.992656	49.2515	0	C1203	44.44	B1503	6.8	B1503	0.12
High	KALSRLISF	40	1	1	Q8N8L2		0	8.93034e+07	0.001	0.002098	29.18	0.0942095	2	1034.63	-1.01499	57.0193	0	C1203	74.07	B1503	8.8	B1503	0.17
High	FKNIQPSSF	5	1	1	Q9BVQ7		0	6.11815e+06	0.001	0.003258	29.08	0.483194	2	1067.55	-0.468389	48.5209	0	C1203	37.04	B1503	6.1	B1503	0.08
High	EAAEVILRV	61	1	1	P78371		0	4.98579e+09	0.001	0.003393	28.99	0.319179	2	999.583	-0.570267	56.57	0	C1203	88.89	A6802	7.3	A6802	0.05
High	GQLPGLHEY	15	1	1	Q8TAT6		0	2.87946e+07	0.001	0.001745	28.96	0.470621	2	1013.5	-0.891275	48.0764	0	C1203	48.15	B1503	6.7	B1503	0.12
High	EVMMLTERV	2	1	1	Q9H0S4		0	1.59011e+07	0.001	0.002766	28.87	0.539627	2	1107.55	-0.654764	58.7063	0	C1203	37.04	A6802	6.1	A6802	0.03
High	HTIYPKDSV	17	1	1	Q9NZP8		0	11159377	0.001	0.003393	28.82	0.687133	2	1059.55	-0.151736	27.9968	0	C1203	66.67	A6802	9.3	A6802	0.07
High	TSAAIYHVL	10	1	1	P46977		0	1.73387e+07	0.001	0.002652	28.72	0.753358	2	974.53	-0.204435	51.3864	0	C1203	74.07	A6802	38.2	A6802	0.4
High	TVFDEAIRA	7	3	3	P63000;P15153;P60763		0	1.17006e+07	0.001	0.003041	28.66	0.648456	2	1021.53	-0.162278	54.6505	0	C1203	11.11	A6802	144.3	A6802	1
High	ETFMNRVEV	16	1	1	Q9UBU8		0	3.66207e+07	0.001	0.0019	28.58	0.45971	2	1124.54	-0.503947	53.8098	0	C1203	77.78	A6802	4.8	A6802	0.02
High	ELINIIDGV	19	1	1	Q8NI22		0	1.6196e+07	0.001	0.003748	28.49	0.379291	2	985.556	-0.295627	88.3474	0	C1203	40.74	A6802	11.1	A6802	0.09
High	FGVDRAILY	8	1	1	P06756		0	2.21388e+07	0.001	0.003078	28.47	0.455785	2	1053.57	-0.810848	63.226	0	C1203	48.15	C1203	20.6	C1203	0.08
High	FASHVSPEV	24	1	1	Q9NP61		0	1.93526e+08	0.001	0.003393	28.38	0.577795	2	972.478	-0.813935	38.0407	0	C1203	85.19	C1203	13.7	C1203	0.04
High	KLFPGSPAIY	15	7	7	P49792;P0DJD0;P0DJD1;A6NKT7;Q7Z3J3;Q99666;O14715		0	1.8912e+07	0.001	0.001746	28.35	0.507156	2	1092.61	-0.706085	61.7124	0	C1203	51.43	B1503	9.2	B1503	0.17
High	QKFLQGLVY	19	1	1	Q5J8M3		0	4.45671e+07	0.001	0.003393	28.32	0.344816	2	1095.62	-0.170557	64.9772	0	C1203	48.15	B1503	7	B1503	0.12
High	RKLPEKTQTF	15	1	1	Q96SY0		0	9.65889e+06	0.001	0.003385	28.14	0.34245	3	1247.71	0.118843	24.3215	0	C1203	34.29	B1503	39.5	B1503	1
High	FTAESSREV	10	1	1	Q5T8I3		0	6.12611e+06	0.001	0.003399	28.11	0.44117	2	1025.49	-0.542072	29.7063	0	C1203	85.19	A6802	9.7	C1203	0.06
High	EVIGKITAL	29	1	1	O43264		0	6.04045e+07	0.001	0.003393	28.1	0.27445	2	943.582	-0.505088	57.7749	0	C1203	44.44	A6802	28.2	A6802	0.3
High	HSVYITSRV	21	1	1	Q8N961		0	1.67079e+07	0.001	0.001745	28.09	0.603956	2	1061.57	-0.749505	30.9807	0	C1203	66.67	A6802	5.7	A6802	0.03
High	SAYANAKKY	13	1	1	O60524		0	2.02418e+06	0.001	0.003706	28.08	0.668209	2	1015.52	-0.303252	20.7289	0	C1203	81.48	C1203	27.9	C1203	0.12
High	TKISTHVSF	15	1	1	Q8TEY7		0	9.40088e+06	0.001	0.002997	27.88	0.705159	2	1019.55	-0.420768	35.7897	0	C1203	37.04	B1503	5.4	B1503	0.06
High	ETFEHPNVV	41	1	1	Q00534		0	2.49446e+08	0.001	0.003393	27.87	0.539397	2	1071.51	-0.612226	44.6115	0	C1203	81.48	A6802	8.4	A6802	0.06
High	RAAPFSLEY	15	1	1	Q15181		0	2.41696e+07	0.001	0.001745	27.86	0.643924	2	1053.54	-0.91436	57.7808	0	C1203	92.59	B1503	4	B1503	0.03
High	EVDATSKYSV	4	1	1	Q9UK61		0	7.99804e+06	0.001	0.002475	27.81	0.522975	2	1098.53	-0.742923	36.8141	0	C1203	25.71	A6802	45.3	A6802	0.4
High	AKFSLPVSL	3	1	1	Q12980		0	7.67362e+06	0.001	0.003453	27.75	0.36195	2	961.572	-0.0399635	70.2177	0	C1203	55.56	B1503	15.7	B1503	0.4
High	DTVVGVWRV	3	1	1	Q969K4		0	7.62566e+06	0.001	0.003073	27.72	0.702885	2	1030.57	0.0985215	67.7974	0	C1203	70.37	A6802	22.1	A6802	0.2
High	VHPPPTTTY	5	1	1	Q969N2		0	1.80188e+07	0.001	0.003276	27.56	0.723213	2	1012.51	0.755924	32.9071	0	C1203	51.85	B1503	62.1	B1503	1.4
High	ETFFGVQWV	10	1	1	P32970		0	8.73188e+06	0.001	0.001753	27.46	0.595313	2	1112.54	-0.0971436	99.5861	0	C1203	74.07	A6802	4.1	A6802	0.01
High	FTWEGLYNV	22	1	1	P51784		0	7.50857e+07	0.001	0.00246	27.41	0.555003	2	1128.54	-0.227817	89.8319	0	C1203	74.07	A6802	4	A6802	0.01
High	ETIFGEWTV	31	1	1	Q96MT1		0	4.90579e+08	0.001	0.001745	27.39	0.675206	2	1081.52	-0.70881	92.7064	0	C1203	70.37	A6802	3.8	A6802	0.01
High	EAVSFQHFI	26	1	1	Q99598		0	3.59584e+07	0.001	0.003393	27.36	0.807067	2	1077.54	-1.12057	65.5873	0	C1203	70.37	A6802	6.7	A6802	0.04
High	MRYVASYLL	27	1	1	P05387		0	7.72441e+07	0.001	0.003625	27.31	0.825423	2	1115.59	-0.407952	66.096	0	C1203	40.74	B1503	28.5	C1203	0.4
High	RTYPVEILY	8	1	1	Q14562		0	2.64877e+07	0.001	0.00377	27.13	0.652865	2	1153.62	-0.882604	63.3318	0	C1203	81.48	B1503	32.9	C1203	0.25
High	GQFLVKSGY	1	1	1	Q9NZI8		0	8.97284e+06	0.001	0.003393	27.11	0.702275	2	998.53	-0.209537	47.6896	0	C1203	40.74	B1503	9.9	B1503	0.2
High	DAYDFSTDYV	1	1	1	Q9BVP2		0	1.17409e+07	0.001	0.003393	27.11	0.137537	2	1195.48	0.348325	80.7467	0	C1203	60	A6802	10.1	A6802	0.08
High	KVPPFTFHV	20	1	1	Q6NZI2		0	4.28696e+07	0.001	0.002875	26.98	0.464837	2	1071.6	-0.51441	54.8763	0	C1203	44.44	A6802	46.2	A6802	0.5
High	SAFPEVRSL	14	1	1	Q6YHU6		0	2.42489e+07	0.001	0.003393	26.62	1.03496	2	1005.54	-0.603757	55.0949	0	C1203	92.59	C1203	16.9	C1203	0.06
High	RKFEPGTQRF	3	2	2	Q96BX8;Q86TA1		0	2.16618e+06	0.001	0.003096	26.6	0.780484	3	1265.67	-0.241016	30.1548	0	C1203	45.71	B1503	12.9	B1503	0.3
High	VAIQAVLSL	19	9	9	P62736;Q562R1;Q9BYX7;P60709;P68032;P63261;P63267;P68133;A5A3E0		0	1.07347e+07	0.001	0.003674	26.38	0.410692	2	913.572	-0.0420633	85.5343	0	C1203	85.19	C1203	29.9	C1203	0.12
High	FALPYVIVL	3	1	1	Q8N3Z3		0	1.33126e+07	0.001	0.001785	25.66	0.266619	2	1034.63	-1.11573	106.246	0	C1203	96.3	C1203	12.8	C1203	0.04
High	VKIQKHVTF	3	1	1	P23381		0	1.2257e+06	0.001	0.002725	25.65	0.450471	2	1099.66	-0.557087	27.4892	0	C1203	40.74	B1503	9.3	B1503	0.17
High	RTALIFGGFI	9	1	1	Q8N5G0		0	5.44914e+06	0.001	0.002138	25.6	0.433378	2	1094.64	-0.299392	81.6598	0	C1203	31.43	A6802	174.2	A6802	1.1
High	DTFDKNYKA	24	1	1	Q9BZG1		0	3.4601e+07	0.001	0.003393	25.41	0.879765	2	1101.52	-0.762609	30.6023	0	C1203	37.04	A6802	23.9	A6802	0.25
High	QVCAIIERV	45	2	2	Q99613;B5ME19		0	2.92862e+08	0.001	0.003405	25.13	0.944645	2	1030.57	-0.447179	54.5673	0	C1203	40.74	A6802	95.1	A6802	0.8
High	GKNEVTLEF	3	1	1	Q08945		0	1.36559e+07	0.001	0.003704	24.99	1.51775	2	1036.53	-0.302985	52.9665	0	C1203	40.74	B1503	17.3	B1503	0.5
High	LVYDAVKYTL	1	1	1	Q13387		0	4.90928e+06	0.001	0.003393	24.93	0.784937	2	1184.66	-0.210958	66.3894	0	C1203	37.14	C1203	335.7	C1203	1.3
High	ALPEFTSIF	7	1	1	Q13887		0	4.5075e+06	0.001	0.002432	24.66	1.1482	2	1024.54	0.0590301	97.2819	0	C1203	37.04	B1503	41.9	B1503	1
High	YTAEIKQNL	8	1	1	O95926		0	9.15073e+06	0.001	0.003338	24.62	1.32742	2	1079.57	-0.464874	41.2018	0	C1203	77.78	A6802	20.9	A6802	0.2
High	TTFESSHYLL	18	1	1	Q16531		0	3.75085e+07	0.001	0.003393	24.52	1.35375	2	1197.58	-0.297793	59.1871	0	C1203	54.29	A6802	17.1	A6802	0.15
High	QKYAGKDGY	11	1	1	P31949		0	2.78445e+06	0.001	0.003348	24.48	1.28287	2	1029.5	-0.0833138	20.3031	0	C1203	40.74	B1503	78.4	B1503	1.6
High	KQLAEYRKY	7	1	1	O94955		0	1.72876e+06	0.001	0.003519	24.45	1.02293	3	1198.66	-0.619141	23.6282	0	C1203	40.74	B1503	5.7	B1503	0.07
High	ETQNVVTKV	14	1	1	Q96MW1		0	3.33119e+07	0.001	0.00338	24.25	1.41616	2	1017.56	-0.718393	33.6391	0	C1203	70.37	A6802	22.4	A6802	0.25
High	ISPSHIWIF	10	1	1	O94915		0	1.45182e+07	0.001	0.001745	24.22	0.959352	2	1099.59	0.0201512	80.7399	0	C1203	66.67	B1503	394.8	C1203	3
High	SAYDPPRQI	15	1	1	P43268		0	22348325	0.001	0.003825	24.2	1.69907	2	1046.53	-0.499486	40.972	0	C1203	81.48	C1203	35.9	C1203	0.17
High	EAFDRSFEV	33	1	1	Q7Z4W1		0	3.11821e+08	0.001	0.003441	24.08	1.10842	2	1099.5	-0.75946	57.2181	0	C1203	85.19	A6802	4	A6802	0.01
High	FSYVTPRAF	10	1	1	Q9Y4E8		0	8.21327e+06	0.001	0.003776	23.85	1.40979	2	1087.56	-0.192115	60.024	0	C1203	74.07	B1503	3.4	C1203	0.01
High	SQGSFPEHY	5	1	1	Q9HBH0		0	1.34319e+07	0.001	0.003388	23.69	0.748235	2	1051.45	-0.625877	37.7742	0	C1203	44.44	B1503	21.3	B1503	0.6
High	KQFKSEAY	9	1	1	Q03001		0	2.00276e+06	0.001	0.003428	23.68	1.74976	2	1000.51	-0.221069	22.6631	0	C1203	33.33	B1503	8.8	B1503	0.17
High	YSSPEILRV	11	1	1	Q2MV58		0	2.25476e+07	0.001	0.002763	23.24	1.87373	2	1063.58	-1.47008	55.7078	0	C1203	88.89	C1203	33.3	C1203	0.15
High	GKREGIDQSY	7	1	1	O94952		0	2.11322e+06	0.001	0.003002	22.78	1.91754	2	1152.56	-0.460649	23.831	0	C1203	40	B1503	173	B1503	3
High	SKKPESTSF	13	1	1	Q9BT25		0	5.13787e+06	0.001	0.003393	22.64	1.65474	2	1010.51	-0.517749	20.1851	0	C1203	37.04	B1503	11.3	B1503	0.25
High	TTYDLTHTL	14	1	1	Q9NTJ5		0	4.03264e+07	0.001	0.003393	22.62	2.78623	2	1064.53	0.386478	54.1381	0	C1203	77.78	A6802	10.1	C1203	0.04
High	EVIEKFDYV	23	1	1	Q92871		0	4.17251e+07	0.001	0.002461	22.52	2.03136	2	1141.58	-0.791489	59.5345	0	C1203	40.74	A6802	2.9	A6802	0.01
High	YVVPFVAKV	9	1	1	A5YKK6		0	1.60487e+07	0.001	0.001756	22.14	0.832714	2	1021.61	-0.757528	66.1573	0	C1203	51.85	A6802	7.3	A6802	0.05
High	QKIDVQESF	7	1	1	O95602		0	1.06371e+07	0.001	0.003764	21.87	3.08747	2	1093.55	-0.488151	46.2819	0	C1203	33.33	B1503	82.6	B1503	1.6
High	IKISNPTEF	9	1	1	Q9BXS6		0	2.91772e+07	0.001	0.001914	21.6	3.34742	2	1048.57	-1.35016	55.3012	0	C1203	40.74	B1503	5	B1503	0.05
High	TQREFMLSF	1	1	1	Q96GM5		0	10412300	0.001	0.003666	21.58	2.40548	2	1158.56	-0.575564	68.9404	0	C1203	37.04	B1503	3.2	B1503	0.02
High	KAFDYPSLF	1	1	1	Q7L945		0	4.81809e+06	0.001	0.003395	21.31	2.96471	2	1087.55	-0.417035	72.8511	0	C1203	77.78	B1503	4.3	C1203	0.01
High	RQVGATVEF	17	1	1	Q13432		0	1.6497e+07	0.001	0.003704	21	3.36676	2	1006.53	0.295754	42.6783	0	C1203	40.74	B1503	2.7	B1503	0.01
High	EVIDKYTAV	4	1	1	O60870		0	8.872e+06	0.001	0.003393	20.95	2.53995	2	1037.55	-0.30679	45.8581	0	C1203	40.74	A6802	5.6	A6802	0.03
High	RKKQSDVMRF	4	1	1	P61313		0	2.72952e+06	0.001	0.003268	20.36	3.76096	3	1294.71	0.100364	22.3437	0	C1203	28.57	B1503	101.3	B1503	1.9
High	KGYPSEFSTY	2	1	1	P49674		0	5.69385e+06	0.001	0.003409	20.02	2.85333	2	1178.54	0.288038	48.2596	0	C1203	34.29	B1503	32.2	B1503	0.8
High	KHQPHKVTQY	17	2	2	P83881;Q969Q0		0	4.57092e+06	0.001	0.002647	19.98	3.56337	3	1265.68	0.079928	17.3867	0	C1203	31.43	B1503	59.5	B1503	1.3
High	RKVYWFEKF	1	1	1	O60524		0	9.85653e+06	0.001	0.001749	19.76	4.69967	3	1302.7	-0.254474	54.8168	0	C1203	29.63	B1503	19	B1503	0.5
High	GKYPSWTFY	1	1	1	P04040		0	6.65171e+06	0.001	0.001875	19.52	4.15361	2	1148.54	-0.0679786	69.238	0	C1203	48.15	B1503	8.6	B1503	0.17
High	RKVPDNQQF	13	1	1	Q9BX10		0	4.40648e+06	0.001	0.001745	19.48	5.00307	2	1131.59	-0.0703432	25.0599	0	C1203	37.04	B1503	31.5	B1503	0.8
High	ETFDFVHNV	24	1	1	Q96E29		0	6.26997e+07	0.001	0.003039	19.09	3.82324	2	1107.51	-0.371884	63.2637	0	C1203	77.78	A6802	1.9	A6802	0.01
High	EVFALIHEL	8	1	1	Q12766		0	6.13238e+06	0.001	0.003556	18.55	4.52284	2	1070.59	0.17106	79.5387	0	C1203	48.15	A6802	7.1	A6802	0.04
High	HTAIGAHPV	13	1	1	Q92567		0	7.62104e+06	0.001	0.003376	18.39	7.04393	2	902.484	-0.214826	23.8189	0	C1203	70.37	A6802	6	A6802	0.03
High	EVFEGREDSI	3	2	2	P43357;P43360		0	8.16899e+06	0.001	0.003249	18.14	5.33126	2	1180.55	-0.0847644	47.8395	0	C1203	28.57	A6802	54.6	A6802	0.5
High	GKFDWRQQY	11	1	1	Q8N766		0	1.2737e+07	0.001	0.003154	18.09	6.53788	2	1227.59	-0.255574	44.6444	0	C1203	44.44	B1503	19.2	B1503	0.5
High	HTAEITHEI	11	1	1	Q00597		0	9.5906e+06	0.001	0.003393	17.98	6.68966	2	1050.52	0.0482368	28.0942	0	C1203	70.37	A6802	2.5	A6802	0.01
High	HKIDKSHEF	2	1	1	Q9NWV8		0	536325	0.001	0.001948	17.81	5.46156	2	1140.58	-0.350759	18.6449	0	C1203	37.04	B1503	24	B1503	0.6
High	EQADIFERV	13	1	1	O60343		0	5.15413e+07	0.001	0.003396	17.8	7.29471	2	1106.55	-0.61148	54.8854	0	C1203	44.44	A6802	43.4	A6802	0.4
High	RKYGNANVW	20	2	2	P67775;P62714		0	2.14555e+07	0.001	0.002074	17.63	7.99236	2	1107.57	-0.162368	33.9123	0	C1203	11.11	B1503	47.6	B1503	1.1
High	RVFPSPMRI	2	1	1	Q9UPR0		0	6.09896e+06	0.001	0.001759	17.54	5.48151	2	1102.62	-0.770565	48.4378	0	C1203	44.44	C1203	26.4	C1203	0.12
High	ETMPDDLLTTL	12	1	1	P18848		0	1.20255e+07	0.001	0.002879	17.29	6.7087	2	1248.6	0.366636	91.0532	0		0	A6802	160.7	A6802	1.1
High	EIAEAYLGYPV	5	1	1	P08107		0	1.24395e+07	0.001	0.003309	17.2	6.88919	2	1224.61	-0.0405661	81.0596	0		0	A6802	22.5	A6802	0.25
High	EVVHTPETSV	25	1	1	O15427		0	3.57843e+07	0.001	0.003424	17.08	5.70611	2	1097.55	-0.853706	37.4364	0	C1203	25.71	A6802	83.1	A6802	0.7
High	KQFDAGTVNY	1	1	1	P52756		0	4.02044e+06	0.001	0.003393	16.63	7.63379	2	1142.55	-0.89523	42.963	0	C1203	42.86	B1503	2.8	B1503	0.01
High	ETFKNSFVEA	10	1	1	Q6NUM9		0	8.59718e+07	0.001	0.001745	15.56	9.4538	2	1171.56	-0.20448	48.9466	0	C1203	25.71	A6802	14.4	A6802	0.12
High	KKANITFEY	18	1	1	O15372		0	2.64817e+07	0.001	0.003601	15.22	10.8294	2	1113.59	-0.659175	37.5425	0	C1203	44.44	B1503	16.7	B1503	0.4
High	EVFDKTYQFL	5	1	1	Q96EU6		0	1.48385e+07	0.001	0.001745	15.03	13.1839	2	1289.64	-0.464239	72.1352	0	C1203	48.57	A6802	13.4	A6802	0.12
High	KKNKDNVKF	4	1	1	P63173		0	656677	0.001	0.003516	13.28	8.45574	2	1120.65	-0.531109	16.9901	0	C1203	33.33	B1503	66.5	B1503	1.4
High	DTYGFPVDLTGL	2	1	1	P49588		0	6.22301e+06	0.001	0.001745	10.69	33.6633	2	1297.63	-0.251533	105.699	0		0	A6802	185.1	A6802	1.2
High	DAARAIAGV	16	1	1	O75821		0	2.01716e+07	0.002	0.004982	57.17	0.000822629	2	843.468	-0.26686	40.3877	0	C1203	81.48	A6802	5.9	A6802	0.03
High	VKGVSLSSY	2	1	1	Q9Y3B1		0	5.073e+06	0.002	0.00399	53.96	0.00095365	2	939.514	-0.159023	42.273	0	C1203	40.74	B1503	15.2	B1503	0.4
High	STADFQVGV	2	1	1	Q9BYK8		0	3.32568e+07	0.002	0.0102	52.36	0.00262738	2	923.447	-0.379554	59.6817	0	C1203	77.78	A6802	2.7	A6802	0.01
High	TAAQVARVL	12	1	1	A5YKK6		0	2.70111e+07	0.002	0.005972	50.65	0.0020242	2	928.556	-1.85084	39.3693	0	C1203	85.19	C1203	91	C1203	0.5
High	SAADGPRVF	3	1	1	Q9Y285		0	3.92177e+06	0.002	0.00463	49.29	0.00544113	2	919.463	-0.683282	38.8715	0	C1203	85.19	B1503	36.3	C1203	0.25
High	TVVEIILQA	6	1	1	P38935		0	0	0.002	0.006367	48.45	0.00260059	2	985.592	-0.670272	86.9357	0	C1203	11.11	A6802	40.2	A6802	0.4
High	SKSGGDYAY	6	3	3	Q9GIP4;Q8MH63;Q01650		0	5.73952e+06	0.002	0.007831	46.03	0.00545817	2	947.41	-0.206226	26.5749	0	C1203	44.44	B1503	26	B1503	0.7
High	AAFDGGFTV	1	1	1	Q86WA8		0	5.44034e+06	0.002	0.004387	45.32	0.0124204	2	884.414	-0.49184	71.3921	0	C1203	88.89	C1203	14.7	C1203	0.05
High	TLAEIYVAA	21	1	1	P36956		0	4.00788e+07	0.002	0.009663	44.83	0.00973565	2	950.519	-0.156401	70.1475	0	C1203	11.11	A6802	48.4	A6802	0.5
High	SVTQIYHAV	26	1	1	P04844		0	3.56797e+07	0.002	0.004215	44.1	0.0200494	2	1017.54	-0.627138	44.2156	0	C1203	37.04	A6802	11.8	A6802	0.1
High	VKAPSSQTF	1	1	1	Q86TC9		0	4.72954e+06	0.002	0.004019	44.07	0.017646	2	964.51	-0.302969	32.8444	0	C1203	48.15	B1503	4.5	B1503	0.04
High	GVVDIFQTV	34	2	2	P23468;Q13332		0	6.72062e+07	0.002	0.004354	42.64	0.0263621	2	977.53	-0.0739968	85.8068	0	C1203	44.44	A6802	54.5	A6802	0.5
High	KGFPHVIYA	16	1	1	Q13485		0	42370131	0.002	0.004858	40.88	0.0281435	2	1031.57	-0.594543	46.4245	0	C1203	18.52	C1203	414.1	C1203	1.5
High	TVSEVIQGLL	4	1	1	Q8WWW0		0	5.3265e+06	0.002	0.005197	39.81	0.028897	2	1058.61	-0.068809	89.2152	0	C1203	28.57	A6802	105	A6802	0.8
High	YmVPWPLVL	17	1	1	Q9Y342	M2(Oxidation)	0	3.31591e+06	0.002	0.01073	39.65	0.0408749	2	1133.61	-0.363151	105.385	0	C1203	59.26	B1503	8	C1203	0.03
High	EVSNIVKEAI	21	1	1	P63172		0	4.37372e+07	0.002	0.004294	39.55	0.0393092	2	1101.62	-0.0303798	54.0447	0	C1203	11.43	A6802	49.7	A6802	0.5
High	SAKTPGFSV	30	1	1	Q9NY61		0	6.51274e+07	0.002	0.007057	39.08	0.0589856	2	893.473	-0.0531088	39.0147	0	C1203	74.07	C1203	486.7	C1203	1.6
High	ETIPGPDAKV	39	1	1	Q8TDP1		0	165519418	0.002	0.007041	38.8	0.0342747	2	1026.55	-0.815681	41.7936	0	C1203	48.57	A6802	14.5	A6802	0.12
High	TTADPFVKV	25	1	1	Q8IV01		0	3.37308e+07	0.002	0.008102	38.56	0.0657013	2	977.53	-0.63594	48.8997	0	C1203	77.78	A6802	3.5	A6802	0.01
High	EVYGSVAKV	24	1	1	Q07864		0	7.51659e+07	0.002	0.006859	38.41	0.0467029	2	951.515	-0.103382	38.3634	0	C1203	48.15	A6802	6.4	A6802	0.04
High	TTSHLHQAV	13	1	1	P22695		0	4.8122e+06	0.002	0.004384	38.14	0.0636406	2	993.511	-0.208728	19.9928	0	C1203	70.37	A6802	13.2	A6802	0.12
High	SASKIIVFV	26	1	1	O15439		0	4.82161e+07	0.002	0.01061	37.32	0.015477	2	963.587	-0.255849	60.5647	0	C1203	85.19	A6802	13.8	A6802	0.12
High	AVTKIIAKV	17	1	1	P49419		0	1.11662e+07	0.002	0.00571	37.22	0.00657209	2	942.634	-0.507543	32.5634	0	C1203	44.44	A6802	157.5	A6802	1.1
High	EVAPSFGTLL	14	1	1	Q5SRE5		0	1.9143e+07	0.002	0.008192	37.13	0.0858029	2	1033.56	-0.163791	84.8505	0	C1203	34.29	A6802	25.3	A6802	0.25
High	TAYPQVVVV	33	1	1	Q9ULI2		0	1.30475e+08	0.002	0.007707	36.14	0.104244	2	975.551	-0.354217	67.9618	0	C1203	96.3	C1203	11.6	C1203	0.03
High	ETTSISKITV	17	1	1	P51587		0	2.16244e+07	0.002	0.003891	35.99	0.0564463	2	1078.6	-0.136054	46.1129	0	C1203	40	A6802	8.3	A6802	0.06
High	KKTGKTVSY	3	1	1	O00244		0	1.52484e+06	0.002	0.004115	35.97	0.0475634	2	1011.58	-0.47351	16.8723	0	C1203	44.44	B1503	19.2	B1503	0.5
High	GQWGGGSHY	37	1	1	B1AH88		0	1.84296e+08	0.002	0.003993	35.63	0.0250961	2	948.396	0.364297	30.9138	0	C1203	40.74	B1503	5	B1503	0.05
High	MSVHLPFAV	18	1	1	Q9NVA2		0	1.49942e+07	0.002	0.007604	35.5	0.112496	2	1000.53	-0.438333	74.532	0	C1203	70.37	A6802	5.3	A6802	0.03
High	GKVPVVVSY	4	1	1	Q9Y4C4		0	6.28818e+06	0.002	0.00579	35.03	0.081826	2	947.556	-0.132444	47.6795	0	C1203	51.85	B1503	14.5	B1503	0.4
High	AAFPGASLY	9	1	1	Q15038		0	1.4653e+07	0.002	0.009272	34.62	0.173694	2	896.451	-0.273224	69.808	0	C1203	88.89	B1503	5.3	C1203	0.01
High	MSWIIPVFV	4	1	1	Q01650		0	7.16324e+06	0.002	0.008716	34.01	0.131113	2	1091.6	0.569666	107.374	0	C1203	74.07	A6802	17.8	A6802	0.17
High	ETADVKASV	14	1	1	Q8N1F7		0	24322601	0.002	0.005249	33.19	0.206237	2	919.473	-0.221116	28.4252	0	C1203	74.07	A6802	2.2	A6802	0.01
High	AATEIVERV	22	1	1	Q9UID3		0	2.70515e+07	0.002	0.006678	33.18	0.212507	2	987.547	-0.440397	40.7133	0	C1203	85.19	A6802	351.2	A6802	1.8
High	GQFASDVQF	4	1	1	Q02833		0	1.26761e+07	0.002	0.008602	33.14	0.137506	2	998.458	0.652363	65.4819	0	C1203	37.04	B1503	3.7	B1503	0.03
High	AAYDKVRKA	5	1	1	Q9NVM6		0	1.20354e+06	0.002	0.01039	33.13	0.11506	2	1021.58	-0.284285	18.8221	0	C1203	55.56	C1203	200.1	C1203	0.9
High	ETMNNIDRL	14	1	1	Q5T0N5		0	2.98932e+07	0.002	0.004157	33.02	0.190349	2	1105.53	-0.555755	46.9882	0	C1203	70.37	A6802	45.3	A6802	0.4
High	KATNVVRLL	17	1	1	Q9NYU1		0	3.3842e+07	0.002	0.009795	32.99	0.0498575	2	1013.65	-0.709989	38.5123	0	C1203	81.48	C1203	80.7	C1203	0.4
High	EAMKQILGV	22	1	1	Q14444		0	6.72778e+07	0.002	0.004222	32.87	0.204527	2	988.55	0.0282037	55.0134	0	C1203	81.48	A6802	13.4	A6802	0.12
High	KAISGVHTV	18	2	2	Q2VIR3;P41091		0	1.93582e+07	0.002	0.006253	32.67	0.105312	2	911.531	-0.133822	22.2624	0	C1203	85.19	C1203	29.8	C1203	0.12
High	EIAKVTEGV	11	1	1	A0AV96		0	6.71893e+06	0.002	0.005645	32.66	0.215825	2	945.525	-0.12616	36.658	0	C1203	40.74	A6802	3	A6802	0.01
High	ETSDILHRM	6	1	1	Q9UHD2		0	7.91585e+06	0.002	0.008372	32.64	0.175112	2	1101.54	-0.182691	38.5741	0	C1203	66.67	A6802	12.8	A6802	0.12
High	DTAPVIIFV	21	1	1	Q7Z2Z2		0	6.10341e+07	0.002	0.004011	32.51	0.203043	2	974.555	-0.489336	97.4315	0	C1203	85.19	A6802	2.7	A6802	0.01
High	EVISKLYAV	77	1	1	P50990		0	2.15677e+09	0.002	0.004805	32.34	0.100353	2	1021.59	-1.59279	55.9034	0	C1203	40.74	A6802	3	A6802	0.01
High	AKIVPKISY	10	1	1	Q7Z417		0	3.06776e+07	0.002	0.005763	32.32	0.0480047	2	1018.63	-1.45484	39.6207	0	C1203	44.44	B1503	22.9	B1503	0.6
High	MKLLTGLVF	1	2	2	P0DJI8;P0DJI9		0	4.52196e+06	0.002	0.006839	32.31	0.0662688	2	1021.61	-0.909381	80.9603	0	C1203	37.04	B1503	3.7	B1503	0.03
High	SVVELVNKL	10	1	1	Q9BQE5		0	1.36923e+07	0.002	0.00421	32.25	0.121456	2	1000.6	-0.512943	62.415	0	C1203	44.44	A6802	155.9	A6802	1.1
High	DVAEFLYQV	12	1	1	Q9Y5M8		0	4.81093e+06	0.002	0.00858	32.17	0.224553	2	1083.54	0.405258	95.9011	0	C1203	44.44	A6802	3	A6802	0.01
High	ETADVIAKV	61	1	1	O43617		0	814031154	0.002	0.005548	32.12	0.240779	2	945.524	-1.09443	42.6383	0	C1203	77.78	A6802	2	A6802	0.01
High	VKVVPTVY	8	1	1	Q9Y282		0	8.55315e+06	0.002	0.009483	31.97	0.105401	2	904.55	-0.114795	46.7328	0	C1203	36.67	B1503	272.9	B1503	3.5
High	EVIRDVINV	36	1	1	Q6IEG0		0	1.37109e+08	0.002	0.008912	31.93	0.170209	2	1056.6	-0.978546	58.4061	0	C1203	44.44	A6802	7.8	A6802	0.05
High	KAIATTVTY	14	1	1	O43808		0	2.37258e+07	0.002	0.01028	31.78	0.116022	2	967.545	-0.64767	37.507	0	C1203	81.48	B1503	5.1	B1503	0.06
High	NVAEINRQV	13	1	1	O43933		0	9.37373e+06	0.002	0.004727	31.74	0.210746	2	1042.56	-0.954782	33.8979	0	C1203	48.15	A6802	10.3	A6802	0.08
High	RQAPTGLGL	8	1	1	Q9BX59		0	1.98631e+07	0.002	0.004628	31.68	0.132377	2	912.526	-0.557722	40.6378	0	C1203	51.85	B1503	6.2	B1503	0.09
High	HQFLQNEY	23	1	1	Q16531		0	2.70151e+07	0.002	0.01036	31.59	0.199187	2	1078.49	-0.759332	43.5091	0	C1203	43.33	B1503	24.1	B1503	0.6
High	DTFYVQVLV	25	1	1	Q5BJD5		0	9.56378e+06	0.002	0.006622	31.56	0.221305	2	1083.57	0.177121	97.233	0	C1203	74.07	A6802	4.7	A6802	0.02
High	TVVEPYNATL	1	10	10	Q13885;Q9BVA1;Q13509;P04350;P68371;P07437;Q9BUF5;A6NNZ2;Q3ZCM7;A6NKZ8		0	1.18239e+07	0.002	0.0105	31.22	0.346663	2	1106.57	-0.155313	64.7129	0	C1203	34.29	A6802	107.5	A6802	0.8
High	MQREPNQAF	1	1	1	Q13148		0	0	0.002	0.009041	31.08	0.240344	2	1120.52	-0.351774	35.8892	0	C1203	33.33	B1503	2.4	B1503	0.01
High	TVVNFLIRV	6	1	1	Q9Y4A5		0	9.00205e+06	0.002	0.004063	31.02	0.0708053	2	1060.65	-0.553307	77.2853	0	C1203	40.74	A6802	10.8	A6802	0.08
High	EAADVWYNL	22	1	1	Q8TAM2		0	2.7416e+07	0.002	0.004309	30.79	0.279867	2	1080.5	-0.800005	81.2667	0	C1203	81.48	A6802	8.6	A6802	0.06
High	EVAKMIQEV	15	1	1	Q9NRD5		0	4.80347e+07	0.002	0.006872	30.58	0.383112	2	1046.56	0.097539	47.7358	0	C1203	48.15	A6802	8.6	A6802	0.06
High	GKYASIILF	22	1	1	Q8TCB0		0	6.1688e+07	0.002	0.005579	30.55	0.171452	2	1011.59	-0.113152	71.5211	0	C1203	40.74	B1503	5.6	B1503	0.07
High	NIPSFIVRL	7	1	1	P46781		0	1.81324e+07	0.002	0.008073	30.53	0.166313	2	1058.64	-0.300127	76.2357	0	C1203	48.15	A6802	74.4	A6802	0.6
High	LQAPPLTSL	12	1	1	Q96EX3		0	7.05659e+06	0.002	0.005594	29.74	0.175021	2	939.551	-0.118584	72.1078	0	C1203	48.15	B1503	6.8	B1503	0.12
High	GQRKPATSY	50	1	1	P46779		0	2.33939e+08	0.002	0.004532	29.58	0.424809	2	1007.53	-0.4223	18.6242	0	C1203	37.04	B1503	5	B1503	0.05
High	LKKDDSVGY	9	1	1	Q8N766		0	1.99356e+06	0.002	0.005811	29.45	0.327791	2	1024.53	-0.535068	23.8026	0	C1203	44.44	B1503	67.8	B1503	1.4
High	NATAVVRHM	3	2	2	Q14012;Q8IU85		0	1.38384e+06	0.002	0.00659	29.03	0.417086	2	998.52	-0.483167	24.7446	0	C1203	74.07	C1203	549.9	C1203	1.8
High	VAINHIVDF	10	1	1	P78346		0	2.84078e+07	0.002	0.008686	29.03	0.412335	2	1027.56	-0.569454	66.2009	0	C1203	77.78	B1503	12.9	B1503	0.3
High	EAIGNPHHV	8	1	1	Q14146		0	9.68371e+06	0.002	0.007241	28.77	0.538325	2	973.485	-0.0712747	21.1406	0	C1203	81.48	A6802	25.5	A6802	0.25
High	TVADKIHSV	9	1	1	O95147		0	5.51015e+06	0.002	0.004065	28.72	0.376377	2	969.536	-0.489955	28.6927	0	C1203	48.15	A6802	5.1	A6802	0.02
High	AQLPEKVEY	15	1	1	P51532		0	2.28509e+07	0.002	0.008734	28.68	0.724145	2	1076.56	-0.555652	44.8977	0	C1203	55.56	B1503	11.1	B1503	0.25
High	YVASNQHEV	9	1	1	Q13127		0	5.10818e+06	0.002	0.01016	28.5	0.435485	2	1046.49	-0.360832	24.6964	0	C1203	51.85	A6802	13.9	A6802	0.12
High	EISSILKEL	12	1	1	Q9Y4F5		0	1.66189e+07	0.002	0.0106	28.44	0.309854	2	1031.6	-0.390957	71.8561	0	C1203	51.85	A6802	126.7	A6802	0.9
High	LVYDGKIYTL	1	1	1	Q96CT2		0	3.89783e+06	0.002	0.003899	28.39	0.353863	2	1184.66	-0.107915	66.5399	0	C1203	42.86	A6802	427.9	C1203	1.7
High	GKLQKTVSY	10	1	1	P12757		0	2.7877e+06	0.002	0.01003	28.35	0.305156	2	1023.58	-0.0505559	24.9674	0	C1203	40.74	B1503	16.5	B1503	0.4
High	VKVIDRILY	2	1	1	O75533		0	6.66528e+06	0.002	0.009887	27.91	0.0973275	2	1118.69	-0.515555	51.5692	0	C1203	44.44	B1503	42	B1503	1
High	HQMTPSSSY	10	1	1	Q93074		0	5.20183e+06	0.002	0.00687	27.45	0.27163	2	1037.44	-0.563994	31.2224	0	C1203	37.04	B1503	2.1	B1503	0.01
High	EVSQVKETL	23	1	1	P30622		0	1.05805e+08	0.002	0.00561	27.43	0.671636	2	1032.56	-0.743027	34.7705	0	C1203	44.44	A6802	88.6	A6802	0.7
High	MTADSRSQV	40	1	1	P60900		0	1.42509e+08	0.002	0.004985	27.18	0.640319	2	994.462	-0.495488	22.9276	0	C1203	74.07	A6802	3.8	A6802	0.01
High	LQHPNIVGY	2	1	1	Q9BQI3		0	1.85063e+07	0.002	0.00394	27.13	0.630305	2	1040.55	-0.553446	50.2222	0	C1203	51.85	B1503	3	B1503	0.01
High	ALMPPFTAF	13	1	1	P51955		0	4.58615e+06	0.002	0.009664	27.04	0.817872	2	994.506	-0.256418	94.1028	0	C1203	40.74	B1503	3	B1503	0.01
High	NIANHFFTV	13	1	1	Q16222		0	3.64545e+07	0.002	0.008109	26.92	0.875539	2	1062.54	-0.298106	62.8959	0	C1203	44.44	A6802	7.1	A6802	0.04
High	RQFMAETQF	2	1	1	Q14444		0	1.48713e+07	0.002	0.009466	26.42	0.614324	2	1157.54	-0.880125	53.7807	0	C1203	33.33	B1503	2.3	B1503	0.01
High	GKGKFGNVY	14	3	3	O14965;Q96GD4;Q9UQB9		0	1.04561e+07	0.002	0.007154	26.21	0.822583	2	969.515	-0.540712	25.7232	0	C1203	40.74	B1503	27.1	B1503	0.7
High	EIFDGNVAHI	16	1	1	P46939		0	3.38783e+07	0.002	0.009953	26	0.952633	2	1114.55	-0.56496	63.5102	0	C1203	31.43	A6802	25.5	A6802	0.25
High	KSVDWLLVF	18	1	1	Q96J42		0	2.54641e+07	0.002	0.008535	25.96	0.772073	2	1106.62	0.264008	89.5263	0	C1203	70.37	B1503	10.8	B1503	0.25
High	RKNPVQEQTY	2	1	1	Q8N9N2		0	2.04926e+06	0.002	0.008727	25.95	1.03811	2	1262.65	0.225043	26.3901	0	C1203	34.29	B1503	74.8	B1503	1.5
High	GKRIGVFSY	27	1	1	Q01581		0	3.52878e+07	0.002	0.008182	25.7	0.632645	2	1026.57	-0.202348	43.8501	0	C1203	40.74	B1503	23.4	B1503	0.6
High	QQFRNAPPF	11	1	1	O60830		0	3.961e+07	0.002	0.007545	25.67	1.35862	2	1104.56	-0.0289904	45.865	0	C1203	33.33	B1503	2.5	B1503	0.01
High	EIFDKIHSL	8	1	1	Q53GS7		0	1.86654e+07	0.002	0.009291	25.53	1.34085	2	1101.59	-0.0105583	54.5145	0	C1203	48.15	A6802	17.8	A6802	0.17
High	IKFFTGDVF	8	1	1	Q9UBE0		0	6.12868e+06	0.002	0.00448	25.12	1.25182	2	1073.57	-0.193236	76.7137	0	C1203	37.04	B1503	4.4	B1503	0.04
High	YSYPELVKM	18	1	1	Q96MH7		0	11377772	0.002	0.005731	24.74	1.49202	2	1129.56	-1.60266	63.4557	0	C1203	77.78	C1203	7.5	C1203	0.01
High	TVADFFIKA	2	1	1	Q709C8		0	1.44137e+07	0.002	0.005135	24.72	1.07898	2	1011.55	-0.12003	68.2577	0	C1203	11.11	A6802	10	A6802	0.07
High	ATYVFLHTV	9	1	1	Q53FV1		0	9.4915e+06	0.002	0.009848	24.67	1.47839	2	1050.56	-0.295331	60.9677	0	C1203	77.78	A6802	26.2	A6802	0.25
High	EVMPFIDEI	3	1	1	O14980		0	9.91026e+06	0.002	0.005061	24.36	1.46465	2	1092.53	0.00415636	95.3495	0	C1203	44.44	A6802	5.3	A6802	0.03
High	SQYPFPVTLY	3	1	1	Q5R372		0	4.77705e+06	0.002	0.009885	23.93	1.4055	2	1214.61	0.0652296	89.3085	0	C1203	34.29	B1503	3.5	B1503	0.02
High	ESLWPIFRI	3	1	1	P41223		0	4.66965e+06	0.002	0.0089	23.22	1.42548	2	1160.65	-0.335742	91.2177	0	C1203	62.96	A6802	33.1	A6802	0.4
High	DTPDWVARI	6	1	1	Q06203		0	1.01728e+07	0.002	0.006737	23.14	1.8686	2	1072.54	-0.0740702	68.6413	0	C1203	66.67	A6802	52	A6802	0.5
High	SKTGGYLVY	13	1	1	P46087		0	1.40231e+07	0.002	0.00662	23.09	2.43147	2	987.514	-0.512008	44.8094	0	C1203	48.15	B1503	7.4	B1503	0.12
High	RKEETVTVY	11	1	1	Q9BZX2		0	1.17315e+07	0.002	0.009981	22.94	1.6411	2	1124.59	-0.75912	26.9194	0	C1203	48.15	B1503	13.6	B1503	0.4
High	EVVDKINQV	7	1	1	Q8WXH0		0	3.85295e+07	0.002	0.006363	22.73	1.96241	2	1043.57	-0.734023	40.0532	0	C1203	44.44	A6802	7.7	A6802	0.05
High	SAYDHVRKT	9	1	1	P27361		0	1.96696e+06	0.002	0.004759	22.13	2.64964	2	1076.55	-0.315888	18.2104	0	C1203	51.85	C1203	264.8	C1203	1.1
High	YTIPPGHQV	14	1	1	Q16850		0	9.38997e+07	0.002	0.00571	21.91	2.39277	2	1011.53	-0.690296	39.9132	0	C1203	77.78	A6802	7.4	A6802	0.05
High	RGFGFVTY	11	3	3	Q32P51;P09651;P51991		0	2.91477e+07	0.002	0.005244	21.86	1.9715	2	946.478	-0.0912409	61.1083	0	C1203	33.33	B1503	71.3	B1503	1.5
High	ESIDIITRA	15	1	1	Q16531		0	5.63174e+07	0.002	0.004174	21.76	2.13278	2	1017.56	-1.1481	51.5866	0	C1203	37.04	A6802	12.9	A6802	0.12
High	HVIEKMHHV	6	1	1	Q9BYX4		0	698558	0.002	0.006198	21.75	2.64831	2	1129.59	-0.106155	19.7889	0	C1203	40.74	A6802	5.2	A6802	0.02
High	NTIDPSHPM	21	1	1	P49588		0	3.62264e+07	0.002	0.006399	21.6	1.61197	2	1011.46	-0.767468	37.2195	0	C1203	62.96	A6802	9.3	A6802	0.07
High	HTFEVTGQETV	1	1	1	P35544		0	6.94441e+06	0.002	0.006596	21.5	2.45763	2	1247.59	0.258475	47.8007	0		0	A6802	38	A6802	0.4
High	FSAGEPRVL	1	1	1	Q9BRA0		0	8.42352e+06	0.002	0.008119	21.22	3.55762	2	975.525	-0.496257	46.9346	0	C1203	88.89	C1203	33	C1203	0.15
High	GKVRTDITY	26	1	1	P62701		0	7.58101e+07	0.002	0.005404	21.22	2.13427	2	1052.57	-0.799817	32.1982	0	C1203	44.44	B1503	27.2	B1503	0.7
High	EVFGPLPAFV	2	1	1	Q9UPY5		0	2.24633e+06	0.002	0.01027	21.16	3.2044	2	1075.58	-0.452399	99.7661	0	C1203	45.71	A6802	3.4	A6802	0.01
High	EVIPNSNFYV	6	1	1	Q9NTJ3		0	2.39088e+07	0.002	0.004371	20.86	3.49798	2	1181.58	0.0309188	75.2387	0	C1203	25.71	A6802	4.2	A6802	0.01
High	ESSPFVERL	33	1	1	P14625		0	2.9835e+08	0.002	0.01025	19.58	5.37937	2	1063.54	-0.902783	53.085	0	C1203	81.48	A6802	108.2	A6802	0.8
High	NKWEVPSVY	9	1	1	Q75QN2		0	1.59247e+07	0.002	0.00383	19.48	5.04308	2	1121.56	-0.392232	59.789	0	C1203	48.15	B1503	25.5	B1503	0.7
High	ELFTGFIKV	32	1	1	Q86TM6		0	6.495e+07	0.002	0.004122	19.14	2.60986	2	1053.6	-0.244354	77.8205	0	C1203	44.44	A6802	54.3	A6802	0.5
High	EVIAVSEKV	5	1	1	Q14865		0	7.95386e+06	0.002	0.005677	18.9	3.73786	2	973.556	-0.299271	43.13	0	C1203	37.04	A6802	4.5	A6802	0.01
High	EASHITEQQL	10	1	1	Q9BV73		0	1.41015e+07	0.002	0.00549	18.37	4.98931	2	1155.56	-0.270862	35.3679	0	C1203	62.86	A6802	218.9	A6802	1.3
High	YASGRTTGIV	12	7	7	P62736;Q562R1;P60709;P68032;P63261;P63267;P68133		0	9.36067e+06	0.002	0.005131	18.3	4.77826	2	1024.54	-0.653751	32.6911	0	C1203	60	C1203	264.5	C1203	1.1
High	YQSPHSGSF	3	1	1	P32004		0	2.9775e+06	0.002	0.005231	17.44	2.34933	2	1009.44	-1.72947	31.3609	0	C1203	44.44	B1503	2	B1503	0.01
High	SIWPLIRIY	1	1	1	Q9UBH6		0	4.13108e+06	0.002	0.004773	16.95	3.077	2	1160.68	-0.329741	89.3424	0	C1203	51.85	B1503	72.7	B1503	1.5
High	GKWKQISKY	3	1	1	Q9H8X2		0	2.16606e+06	0.002	0.008386	16.83	4.46106	2	1137.64	-0.441695	25.1197	0	C1203	40.74	B1503	69.6	B1503	1.5
High	YQSPVRVY	5	2	2	Q92503;O43304		0	1.26999e+07	0.002	0.005398	16.64	8.06928	2	1011.53	-0.0770128	45.078	0	C1203	43.33	B1503	6.1	B1503	0.08
High	RQLGLEHTRY	1	1	1	Q92508		0	1.08209e+06	0.002	0.006194	16.45	9.25673	3	1272.68	-0.0892626	27.5287	0	C1203	31.43	B1503	15	B1503	0.4
High	KEYERFSKY	13	2	2	O00148;Q13838		0	1.12999e+07	0.002	0.007104	15.42	12.9228	3	1249.62	-0.221684	26.3833	0	C1203	44.44	B1503	6	B1503	0.08
High	RKYVNGSTY	8	1	1	Q6P2Q9		0	2.85476e+06	0.002	0.00733	14.89	13.0125	2	1087.55	-0.742592	23.2193	0	C1203	44.44	B1503	3.2	B1503	0.02
High	YQHDDGRVSY	4	1	1	P60983		0	2.36399e+06	0.002	0.005412	12.89	9.48668	3	1239.54	0.0264328	26.7544	0	C1203	40	B1503	5.8	B1503	0.07
High	RQLPGSQRY	4	1	1	Q96BD0		0	1.76671e+06	0.002	0.009497	10.07	39.4392	2	1104.59	-0.140739	25.1545	0	C1203	44.44	B1503	3.1	B1503	0.01
High	KQAEIVKRL	5	3	3	Q08117;Q04725;Q04727		0	2.48411e+06	0.003	0.01584	47.07	0.00164333	2	1084.68	-1.68615	23.4246	0	C1203	51.85	B1503	55.4	B1503	1.2
High	DVSDILKLL	6	1	1	Q9H446		0	2.20614e+06	0.003	0.01281	40.32	0.0178176	2	1015.6	-0.240534	101.771	0	C1203	48.15	A6802	106.8	A6802	0.8
High	VAFSQVLTI	10	1	1	Q13487		0	4.09548e+06	0.003	0.01108	39.96	0.0242271	2	977.567	0.0477608	84.4369	0	C1203	88.89	C1203	13.1	C1203	0.04
High	AHLNPAVTF	8	1	1	Q92482		0	1.1264e+07	0.003	0.01263	39.95	0.0347983	2	969.516	0.529511	50.0379	0	C1203	40.74	B1503	27.2	B1503	0.7
High	IAVNAVLTV	21	1	1	P48643		0	2.40475e+07	0.003	0.01395	39.87	0.0214526	2	899.556	-0.150628	73.9269	0	C1203	85.19	C1203	15.6	C1203	0.05
High	SVSAVIVRA	14	1	1	Q68CR1		0	3.70659e+07	0.003	0.01274	39.03	0.031494	2	901.546	-0.309527	40.1672	0	C1203	11.11	A6802	59.7	A6802	0.6
High	STAAVFHAV	13	1	1	P57723		0	1.32763e+07	0.003	0.01415	38.93	0.0675769	2	902.473	-0.418241	41.3641	0	C1203	70.37	A6802	2.1	A6802	0.01
High	FTADVRSVL	2	1	1	O95476		0	4.84146e+07	0.003	0.01502	38.87	0.0468801	2	1007.55	-0.324474	60.067	0	C1203	81.48	C1203	5.9	C1203	0.01
High	TTFEHAHNMRV	15	1	1	P13639		0	8.06342e+06	0.003	0.01353	38.44	0.0451426	3	1342.63	-0.308199	27.0551	0		0	A6802	103.8	A6802	0.8
High	NSASIFNTL	27	1	1	Q96HU1		0	3.23929e+07	0.003	0.01253	36.89	0.0777342	2	966.489	-0.441019	74.9147	0	C1203	77.78	A6802	11.8	A6802	0.1
High	GKVGSQSSF	10	1	1	Q9BY84		0	2.46192e+06	0.003	0.01326	36.46	0.0785267	2	896.447	-0.0782495	24.287	0	C1203	33.33	B1503	14.6	B1503	0.4
High	DAANVmVYV	5	1	1	Q9Y4C1	M6(Oxidation)	0	1.33212e+07	0.003	0.01309	36.37	0.0828353	2	997.466	-0.149804	64.3148	0	C1203	81.48	A6802	3.8	A6802	0.01
High	VAFPKSLVA	20	1	1	Q8IWI9		0	3.9233e+07	0.003	0.01129	35.54	0.065178	2	931.561	-0.171304	56.5741	0	C1203	59.26	C1203	63.6	C1203	0.3
High	NTAYIQAIV	6	1	1	Q8IX18		0	1.01611e+07	0.003	0.01166	34.15	0.155106	2	992.541	-0.334714	68.8591	0	C1203	70.37	A6802	3.1	A6802	0.01
High	ETIPLTAEKL	17	1	1	P24385		0	3.50099e+07	0.003	0.01629	33.36	0.124925	2	1114.63	-0.699912	56.6252	0	C1203	51.43	A6802	13.7	A6802	0.12
High	SAFATPFLV	11	1	1	P15954		0	1.33426e+07	0.003	0.0159	32.37	0.226557	2	952.514	-0.308548	88.1438	0	C1203	81.48	A6802	16.1	C1203	0.08
High	RALALVVTL	16	1	1	O00622		0	7.81911e+07	0.003	0.01102	31.93	0.0368054	2	955.63	-0.128668	67.9668	0	C1203	85.19	B1503	40.2	C1203	0.6
High	GKLKPTMAF	10	1	1	Q6YN16		0	1.15336e+07	0.003	0.01324	31.84	0.130469	2	992.559	-0.932751	37.4214	0	C1203	29.63	B1503	7.2	B1503	0.12
High	TAFSRLILI	8	1	1	Q6P2Q9		0	8.01336e+06	0.003	0.01111	31.61	0.0498698	2	1033.64	-0.415089	76.4429	0	C1203	77.78	C1203	21.7	C1203	0.08
High	AQPETRVSY	13	1	1	Q5SWA1		0	1.87734e+07	0.003	0.01514	31.14	0.228393	2	1050.52	-2.15956	31.6356	0	C1203	48.15	B1503	10.6	B1503	0.25
High	QAIGAIRTL	14	1	1	Q9H7E9		0	1.22654e+07	0.003	0.01568	31.11	0.171814	2	942.573	-0.295744	46.9447	0	C1203	88.89	C1203	71.9	C1203	0.4
High	ITADVNHNL	19	1	1	Q16222		0	2.97217e+07	0.003	0.01577	30.33	0.272025	2	996.51	-1.11196	37.461	0	C1203	74.07	A6802	22.9	A6802	0.25
High	AQAPAQSQF	6	1	1	Q92793		0	6.13266e+06	0.003	0.01576	30.12	0.39012	2	947.458	-0.5627	37.4351	0	C1203	44.44	B1503	3.7	B1503	0.03
High	RQYPTPFQL	8	1	1	Q8ND82		0	1.20319e+07	0.003	0.01091	30.12	0.349703	2	1149.6	-0.531934	62.0236	0	C1203	51.85	B1503	7.2	B1503	0.12
High	TVISILNTI	2	1	1	O60716		0	4.10899e+06	0.003	0.0154	30.01	0.128354	2	973.593	0.0213348	91.2823	0	C1203	37.04	A6802	8.6	A6802	0.06
High	EALNVIVRL	10	1	1	Q5UIP0		0	1.64535e+07	0.003	0.01364	29.84	0.131351	2	1026.63	-0.236314	67.7087	0	C1203	81.48	A6802	286.5	A6802	1.5
High	KAYGASKTF	2	1	1	P27694		0	3.59301e+06	0.003	0.01468	29.2	0.591454	2	972.514	-0.503236	24.1634	0	C1203	81.48	B1503	4.7	B1503	0.05
High	RQIGSRSY	17	1	1	P51114		0	1.95962e+07	0.003	0.01476	29.15	0.413868	2	966.511	-0.376889	21.0644	0	C1203	30	B1503	7.2	B1503	0.12
High	TTSTITRHTV	9	1	1	Q07954		0	4.05557e+06	0.003	0.01204	29.15	0.524967	2	1116.6	-0.578582	22.3685	0	C1203	42.86	A6802	11.8	A6802	0.1
High	SAAEIYNEV	10	1	1	Q9BVG8		0	3.90609e+07	0.003	0.01217	28.64	0.560632	2	995.468	-0.169999	57.2005	0	C1203	85.19	A6802	5.5	A6802	0.03
High	YVFPGVTRL	1	1	1	Q9H0A9		0	6.10726e+06	0.003	0.01187	28.57	0.324415	2	1051.59	-0.559336	65.7177	0	C1203	55.56	C1203	5.9	C1203	0.01
High	DTTVIIWQV	20	1	1	Q9H7D7		0	5.65947e+07	0.003	0.01573	28.04	0.806617	2	1074.58	-0.204758	95.0432	0	C1203	70.37	A6802	16.5	A6802	0.15
High	EAMELIVKL	1	1	1	Q9BVS4		0	1.06152e+07	0.003	0.01353	27.95	0.422936	2	1045.6	-0.254817	72.3585	0	C1203	85.19	A6802	43.4	A6802	0.4
High	LSFPTTKTY	9	1	1	P69905		0	9.68974e+06	0.003	0.01321	27.66	0.682412	2	1057.55	-1.51683	51.9754	0	C1203	85.19	B1503	9.7	C1203	0.03
High	HAAKVILQV	8	1	1	Q63HN8		0	1.52152e+07	0.003	0.01348	27.36	0.103764	2	978.609	-0.100859	35.4232	0	C1203	85.19	A6802	25.5	A6802	0.25
High	DSSEIHFKV	15	1	1	P63165		0	4.01714e+07	0.003	0.01553	26.68	1.06103	2	1061.53	-1.10152	44.4223	0	C1203	74.07	A6802	12.9	A6802	0.12
High	AAFEKALEV	14	1	1	Q13325		0	1.84538e+07	0.003	0.01145	26.24	1.15075	2	977.531	0.290402	51.9995	0	C1203	92.59	C1203	13.1	C1203	0.04
High	ESADIARAEV	5	1	1	A6NKF1		0	7.33047e+06	0.003	0.01617	25.94	1.047	2	1060.53	-0.543611	38.3557	0	C1203	51.43	A6802	5.7	A6802	0.03
High	FAYDGKDYI	19	11	11	P30462;P18463;Q95365;P30475;Q29836;Q31612;P30504;Q9TNN7;P30505;Q95604;Q29865		0	3.65545e+07	0.003	0.01603	25.77	0.830702	2	1091.5	-0.661099	59.3777	0	C1203	77.78	C1203	5.5	C1203	0.01
High	STAAVIQNV	4	1	1	Q6P4R8		0	9.40604e+06	0.003	0.0147	25.51	1.51477	2	902.494	-0.0255694	48.1642	0	C1203	74.07	A6802	4.5	A6802	0.01
High	RKLEAAEDIAY	2	1	1	P35232		0	1.82588e+07	0.003	0.01105	25.09	1.3528	2	1278.67	-0.214754	42.8492	0		0	B1503	103.4	B1503	1.9
High	FKIEPPGLF	1	2	2	Q969P6;P11387		0	5.71633e+06	0.003	0.01617	24.49	1.17892	2	1047.59	-1.11882	75.1196	0	C1203	40.74	B1503	7.5	B1503	0.12
High	ETQRQMAHV	8	1	1	Q09472		0	3.94839e+06	0.003	0.01497	23.68	1.46799	2	1099.53	-0.270881	21.0681	0	C1203	66.67	A6802	16.1	A6802	0.15
High	HTFFIGDHA	8	1	1	O15294		0	1.43199e+07	0.003	0.01621	22.96	1.31135	2	1044.49	-0.932676	41.0011	0	C1203	33.33	A6802	12.7	A6802	0.12
High	RKVKNSQSF	6	1	1	P54920		0	1.0802e+06	0.003	0.01498	21.63	1.54247	2	1093.61	-0.387576	16.3779	0	C1203	29.63	B1503	5.1	B1503	0.06
High	AKVVDKSEY	6	1	1	P42695		0	3910583	0.003	0.01559	21.45	2.27304	2	1038.55	-0.31684	22.6562	0	C1203	44.44	B1503	98.5	B1503	1.8
High	KKAQAQPVM	8	1	1	P24539		0	1.46534e+06	0.003	0.01616	20.46	2.10617	2	1000.56	-0.398673	19.1905	0	C1203	37.04	B1503	16.5	B1503	0.4
High	NTAETITRV	13	1	1	O96006		0	1.50579e+07	0.003	0.01398	20.4	3.83683	2	1004.54	-0.105916	33.3785	0	C1203	77.78	A6802	4.8	A6802	0.02
High	FSFPSIFIY	3	1	1	O43913		0	1.33157e+07	0.003	0.01428	20.21	4.65536	2	1120.57	0.060176	107.322	0	C1203	85.19	C1203	7.3	C1203	0.01
High	EISDIHTKL	2	1	1	Q9UHD2		0	4.65521e+06	0.003	0.01264	19.88	3.05629	2	1055.57	-0.484917	39.1892	0	C1203	44.44	A6802	42.2	A6802	0.4
High	ETSKYYVTI	8	2	2	P68104;Q5VTE0		0	4.72425e+07	0.003	0.01378	19.64	4.66565	2	1103.56	-0.547685	51.9162	0	C1203	70.37	A6802	12.1	A6802	0.1
High	FGIPFLLRI	2	1	1	Q93009		0	2.2826e+06	0.003	0.0159	18.9	0.747185	2	1075.67	-0.693856	97.8875	0	C1203	44.44	C1203	59.9	C1203	0.3
High	EIFSRGPYSV	13	1	1	Q7LBC6		0	2.61021e+07	0.003	0.01615	18.25	5.78594	2	1154.58	-0.47429	56.0246	0	C1203	40	A6802	25.9	A6802	0.25
High	EVSRISEVL	13	1	1	Q07065		0	1.88976e+07	0.003	0.0151	17.78	6.0221	2	1031.57	-0.860896	51.1012	0	C1203	44.44	A6802	31.7	A6802	0.3
High	ESFGNEIYTV	4	1	1	O43148		0	2.16837e+07	0.003	0.01292	17.44	4.80594	2	1158.53	-0.177614	70.7204	0	C1203	57.14	A6802	9.1	A6802	0.07
High	NFFPGVFEY	5	1	1	Q76I76		0	7.99184e+06	0.003	0.01549	17.2	6.38139	2	1119.51	-0.142387	94.9298	0	C1203	55.56	B1503	160.9	C1203	1.9
High	KKFSDSVKSTF	8	1	1	Q9ULG6		0	1.34219e+07	0.003	0.01592	15.84	11.1179	3	1273.68	0.034787	30.6715	0		0	B1503	37.2	B1503	0.9
High	KTASINQNV	18	1	1	Q8NI77		0	1.7668e+07	0.004	0.01668	41.58	0.0320858	2	974.526	-0.348497	26.9478	0	C1203	74.07	A6802	59.5	A6802	0.6
High	LTVPFARYL	15	2	2	P12081;P49590		0	1.11442e+07	0.004	0.01668	41.04	0.0141157	2	1079.62	-0.704193	78.5143	0	C1203	77.78	C1203	30.7	C1203	0.15
High	EAAPGALGQV	12	1	1	Q8WYQ5		0	1.63955e+07	0.004	0.01668	40.73	0.0293269	2	912.478	-0.287368	50.805	0	C1203	60	A6802	25	A6802	0.25
High	EIIDIIAQV	2	1	1	Q5T215		0	3.41784e+06	0.004	0.01668	39.94	0.0229195	2	1013.59	-0.156131	93.2736	0	C1203	44.44	A6802	3.5	A6802	0.01
High	EAIGFATTV	10	1	1	Q8IWV8		0	1.78679e+07	0.004	0.01668	38.55	0.0612098	2	908.472	-0.495198	65.7797	0	C1203	81.48	A6802	5	A6802	0.02
High	TVTDVVRFI	2	1	1	Q5VUG0		0	6.56058e+06	0.004	0.01668	38.46	0.034685	2	1049.6	-0.0921763	71.7108	0	C1203	40.74	A6802	34.5	A6802	0.4
High	SVADTVARV	4	1	1	Q9NYY3		0	1.03626e+07	0.004	0.01668	37.51	0.0832538	2	917.505	-0.407621	39.874	0	C1203	48.15	A6802	8.1	A6802	0.05
High	EVAQAGKAV	21	1	1	Q9UPN9		0	1.25471e+07	0.004	0.01668	37.5	0.0888606	2	872.484	0.173009	21.2147	0	C1203	44.44	A6802	79.3	A6802	0.7
High	STIGVDFKI	3	3	3	P62820;Q9H0U4;Q92928		0	5.20573e+06	0.004	0.01668	36.6	0.0600541	2	979.546	0.336801	65.4172	0	C1203	62.96	A6802	16.6	A6802	0.15
High	FTSSRHTVV	15	1	1	Q9NZ01		0	1.45189e+07	0.004	0.01668	36.59	0.0884578	2	1033.54	-1.32168	23.2057	0	C1203	81.48	C1203	12.9	C1203	0.04
High	FAADIISVL	1	1	1	Q13200		0	2.45924e+07	0.004	0.01671	35.66	0.074281	2	948.54	-0.412054	92.8555	0	C1203	92.59	C1203	3.3	C1203	0.01
High	NVTSIMFLV	20	2	2	P29992;P50148		0	2.44321e+07	0.004	0.01668	34.7	0.118409	2	1023.55	-0.36991	96.7441	0	C1203	40.74	A6802	4	A6802	0.01
High	VAIVRPSIV	1	1	1	Q8WVX9		0	6.67837e+06	0.004	0.01668	34.07	0.018216	2	953.614	-0.166728	53.0557	0	C1203	81.48	C1203	109.1	C1203	0.5
High	GKYGSSLEF	16	1	1	P55212		0	1.15377e+07	0.004	0.01668	33.55	0.161107	2	987.478	-0.333641	47.8864	0	C1203	44.44	B1503	3.6	B1503	0.03
High	ELINIIDGVL	7	1	1	Q8NI22		0	2.04665e+06	0.004	0.01668	33.35	0.0794371	2	1098.64	-0.232025	103.072	0	C1203	34.29	A6802	491.6	A6802	2.5
High	EVINTVAQV	8	1	1	O15121		0	5.12717e+07	0.004	0.01668	33.29	0.190807	2	972.536	-0.525678	56.6264	0	C1203	40.74	A6802	6.3	A6802	0.03
High	EVVSHTSQV	9	1	1	Q8IX04		0	3.97196e+07	0.004	0.01668	32.42	0.194607	2	985.494	-0.754014	26.9056	0	C1203	40.74	A6802	8.1	A6802	0.05
High	KATAYILSV	16	1	1	P01106		0	1.8061e+07	0.004	0.01668	31.95	0.0851763	2	965.567	0.437981	54.0728	0	C1203	81.48	C1203	52.2	C1203	0.25
High	ESAGLGYRV	12	1	1	Q63HN8		0	2.34337e+07	0.004	0.01668	31.88	0.255724	2	951.489	-0.227984	43.1123	0	C1203	74.07	A6802	6.5	A6802	0.04
High	STVSIQIKL	26	1	1	O60502		0	4.27483e+07	0.004	0.01668	31.2	0.0823815	2	988.604	-0.138621	60.8731	0	C1203	74.07	A6802	100.4	A6802	0.8
High	HSAEILAEI	38	1	1	Q6FI81		0	6.53686e+08	0.004	0.01668	30.96	0.191681	2	982.519	-1.17822	55.9769	0	C1203	70.37	A6802	5.3	A6802	0.03
High	KANPGAWIL	31	2	2	Q9NYU2;Q9NYU1		0	8.99544e+07	0.004	0.01666	30.83	0.182141	2	969.551	-0.753319	58.2891	0	C1203	81.48	B1503	352.7	C1203	1.4
High	QTYGYEHIL	13	1	1	Q96AX1		0	2.68924e+07	0.004	0.01668	30.83	0.338758	2	1123.54	-0.601674	57.0884	0	C1203	74.07	A6802	117	A6802	0.9
High	ETFGMKLSV	27	2	2	Q9GZQ8;A6NCE7		0	8.58346e+07	0.004	0.01668	30.49	0.348255	2	1011.52	-0.3713	61.5821	0	C1203	77.78	A6802	4.9	A6802	0.02
High	IATEIILEI	1	1	1	P42892		0	2.27281e+07	0.004	0.01668	30.45	0.174679	2	1014.61	-0.470808	92.8651	0	C1203	81.48	C1203	36.4	C1203	0.17
High	YASNITSVL	10	2	2	Q13085;O00763		0	4.20355e+07	0.004	0.01668	30.32	0.251425	2	967.509	-0.697295	69.2545	0	C1203	85.19	C1203	4.4	C1203	0.01
High	FSLPYVQYF	3	1	1	P15291		0	2.48877e+06	0.004	0.01668	30.19	0.439591	2	1163.58	-0.310658	99.5229	0	C1203	74.07	C1203	10.6	C1203	0.03
High	QAYSGIQQY	2	2	2	Q92879;O95319		0	11375166	0.004	0.01648	29.9	0.301155	2	1057.49	-0.452897	48.4539	0	C1203	85.19	B1503	12.6	C1203	0.15
High	STFSGIKEL	3	1	1	Q8N3U4		0	9.72777e+06	0.004	0.01668	29.68	0.254799	2	981.525	-0.608817	50.8035	0	C1203	85.19	C1203	31.9	C1203	0.15
High	TTFPRPVTV	73	1	1	Q15233		0	1.76645e+09	0.004	0.01668	29.66	0.423706	2	1017.57	-0.839535	50.5319	0	C1203	88.89	C1203	11.7	C1203	0.03
High	GKSSVIQVF	6	1	1	Q8WVC6		0	1.09473e+07	0.004	0.01668	29.63	0.301253	2	964.546	0.0631874	51.3974	0	C1203	44.44	B1503	11.5	B1503	0.25
High	TAAGVDHRV	8	1	1	P28065		0	1.10666e+06	0.004	0.01668	29.04	0.468891	2	925.485	-0.415523	20.0525	0	C1203	81.48	A6802	19.1	A6802	0.17
High	EVDPNIQAV	18	1	1	P05787		0	5.37452e+07	0.004	0.01668	28.56	0.476529	2	984.5	-0.0202257	54.1975	0	C1203	48.15	A6802	90.4	A6802	0.7
High	EVWQVIIGA	1	1	1	Q9NR28		0	1.12465e+07	0.004	0.01668	28.33	0.627378	2	1014.56	-0.154903	89.0983	0	C1203	7.41	A6802	44.1	A6802	0.4
High	EIASITEQL	39	1	1	Q5UIP0		0	1.6386e+08	0.004	0.01668	27.68	0.577424	2	1003.53	-0.582349	66.9548	0	C1203	44.44	A6802	9	A6802	0.06
High	ELSNVLAAM	10	1	1	Q9Y3U8		0	1.14993e+07	0.004	0.01673	27.53	0.90739	2	947.487	0.0428868	77.2977	0	C1203	33.33	A6802	96	A6802	0.8
High	AAFEGTVFF	3	1	1	Q8NB49		0	8.97712e+06	0.004	0.01668	26.32	0.87878	2	988.477	-0.29424	88.8615	0	C1203	81.48	B1503	6.1	C1203	0.05
High	MTVDDLLSL	2	1	1	Q86W92		0	6.57082e+06	0.004	0.01668	26.29	0.74965	2	1006.51	-0.0213551	99.064	0	C1203	74.07	C1203	24.4	C1203	0.1
High	EVIGGTNHTL	17	1	1	Q9P2E3		0	2.11305e+07	0.004	0.01668	26.03	0.836313	2	1040.54	-1.04077	40.3466	0	C1203	40	A6802	51.4	A6802	0.5
High	VKVDELSLY	1	1	1	Q9BUR5		0	5.78322e+06	0.004	0.01668	25.52	0.788467	2	1065.58	-0.574757	61.2717	0	C1203	44.44	B1503	22.8	B1503	0.6
High	FINELITEL	8	1	1	Q96NH3		0	3.0409e+06	0.004	0.01668	25.4	0.803059	2	1091.6	2.4262	104.034	0	C1203	51.85	C1203	13	C1203	0.04
High	LQRATPEQY	2	1	1	P14324		0	5.29179e+06	0.004	0.01668	25.32	1.26671	2	1105.56	-0.252549	33.35	0	C1203	40.74	B1503	6.9	B1503	0.12
High	RQEGVPRTF	31	1	1	Q00403		0	70186951	0.004	0.01668	25.2	1.30522	2	1089.58	-0.352299	30.5505	0	C1203	44.44	B1503	9.5	B1503	0.2
High	RKIKVSNTL	14	1	1	P36543		0	5.41219e+06	0.004	0.01668	25.09	0.177327	2	1058.67	-0.772077	23.0005	0	C1203	40.74	B1503	25.3	B1503	0.7
High	TTYEGIFKT	4	1	1	Q8WWM7		0	8.57879e+06	0.004	0.01668	24.91	1.23377	2	1059.53	-0.728236	52.0556	0	C1203	40.74	A6802	31	A6802	0.3
High	GTYFNPHTV	12	1	1	O60294		0	3.56177e+07	0.004	0.01668	24.88	1.14935	2	1035.49	-0.720665	43.8054	0	C1203	77.78	C1203	101.1	C1203	0.5
High	KSFGSAQEF	1	1	1	P35606		0	3.24758e+06	0.004	0.01668	24.78	1.05503	2	1000.47	-0.716078	37.1545	0	C1203	70.37	B1503	6.6	B1503	0.1
High	TSMDKTFKV	1	1	1	Q64LD2		0	4.80548e+06	0.004	0.0167	23.5	1.52096	2	1056.54	-0.447945	38.1566	0	C1203	70.37	A6802	16.3	A6802	0.15
High	DVASIKEKV	3	1	1	Q13601		0	4.87942e+06	0.004	0.01668	22.91	1.35161	2	988.567	-0.886552	32.4963	0	C1203	44.44	A6802	27.9	A6802	0.3
High	QGFPNRVVF	42	1	1	P35579		0	2.38764e+08	0.004	0.01668	22.23	2.25511	2	1063.57	-1.24778	58.2722	0	C1203	48.15	B1503	44.9	B1503	1.1
High	FTFGSKVTY	10	1	1	Q4LDE5		0	1.80632e+07	0.004	0.01668	21.96	3.05694	2	1049.53	-1.32927	55.5026	0	C1203	85.19	C1203	9.7	C1203	0.02
High	ETQKSIYYI	41	1	1	P08238		0	476805869	0.004	0.01668	21.44	3.09656	2	1144.59	-1.00772	50.2466	0	C1203	62.96	A6802	12.3	A6802	0.1
High	EAADVLIKA	27	1	1	Q7Z6Z7		0	8.00158e+07	0.004	0.01668	21.02	2.93065	2	929.53	-0.416888	45.4452	0	C1203	48.15	A6802	12.6	A6802	0.1
High	PQRATSNVF	5	3	3	P19105;O14950;P24844		0	6.97462e+06	0.004	0.0167	20.75	3.76608	2	1019.53	-1.0258	30.8887	0	C1203	33.33	B1503	22.2	B1503	0.6
High	QTVDIRAQL	6	1	1	Q96C10		0	4.47297e+07	0.004	0.01668	20.43	3.57991	2	1043.58	-0.733566	52.6984	0	C1203	70.37	A6802	13.7	A6802	0.12
High	HQKLGIAY	6	1	1	Q9HB58		0	1.02537e+07	0.004	0.01668	20.32	3.32895	2	929.52	-0.831022	35.6643	0	C1203	36.67	B1503	32.3	B1503	0.8
High	KQVKYFIHY	1	1	1	Q9UBU8		0	2.79383e+06	0.004	0.01668	20.13	2.74848	3	1225.67	0.226845	35.9443	0	C1203	40.74	B1503	3.2	B1503	0.02
High	ETILISNNQV	9	1	1	Q9H9A6		0	2.11771e+07	0.004	0.01668	20.1	4.49725	2	1130.6	-0.27888	61.1284	0	C1203	40	A6802	7	A6802	0.04
High	SQYQGVVVY	12	1	1	Q9Y221		0	3.18492e+08	0.004	0.01635	19.81	3.83987	2	1042.52	-1.14018	58.9508	0	C1203	51.85	B1503	1.9	B1503	0.01
High	HTFFIKDSL	4	1	1	Q8NFG4		0	9.52677e+06	0.004	0.01668	19.09	5.42813	2	1107.58	-0.71703	52.0858	0	C1203	70.37	A6802	12.6	A6802	0.1
High	EIYSDTQFPS	15	1	1	Q9UKY7		0	2.16083e+07	0.004	0.01668	18.75	3.06377	2	1186.53	0.00119335	61.7189	0	C1203	5.71	A6802	406.8	A6802	1.9
High	AKYKNQVVY	4	1	1	Q9NVR2		0	1.37376e+06	0.004	0.01668	17.22	5.67589	2	1112.61	-0.421263	25.9776	0	C1203	51.85	B1503	5	B1503	0.05
High	RQKGTGKEY	2	1	1	O43293		0	959323	0.004	0.01668	17.17	6.7518	2	1066.56	-0.351661	15.9062	0	C1203	48.15	B1503	8.9	B1503	0.17
High	GKTKEGVLY	3	1	1	P37840		0	2.54124e+06	0.004	0.01668	16.69	5.19972	2	994.557	-0.0623806	24.3401	0	C1203	40.74	B1503	109.6	B1503	2
High	YTIGKEIIDLV	2	3	3	Q71U36;P68363;Q9BQE3		0	6.73212e+06	0.004	0.01668	15.3	5.56155	2	1263.72	0.19218	79.5575	0		0	A6802	38.4	A6802	0.4
High	ETYNGHLVSC	15	1	1	Q9Y4Z0		0	1.4994e+08	0.004	0.01668	15.26	5.87959	2	1122.49	-0.552997	41.7969	0	C1203	28.57	A6802	92.5	A6802	0.8
High	EAFHYIFNV	3	1	1	Q9UEY8		0	6.84399e+08	0.004	0.01668	13.66	18.0412	2	1139.55	1.28392	75.7339	0	C1203	81.48	A6802	3.5	A6802	0.01
High	AAFGAPGII	1	1	1	O95758		0	2.26149e+06	0.005	0.0182	41.2	0.0509499	2	816.461	-0.445987	74.4881	0	C1203	81.48	C1203	46.6	C1203	0.25
High	STASILASV	13	1	1	O60716		0	2.99992e+07	0.005	0.01832	39.91	0.0225423	2	848.472	0.0570533	65.003	0	C1203	74.07	A6802	2.4	A6802	0.01
High	SVIDIINGEA	2	1	1	Q7L5N1		0	2.07584e+07	0.005	0.0184	39.69	0.0464232	2	1030.54	-0.374566	77.3084	0	C1203	5.71	A6802	32.6	A6802	0.3
High	TTSNTVSKL	7	1	1	Q6NZI2		0	7.7174e+06	0.005	0.017	36.11	0.0732025	2	950.515	-0.28306	25.3761	0	C1203	74.07	A6802	219.5	A6802	1.3
High	GQFSKPFSF	1	1	1	P35658		0	5.26649e+06	0.005	0.01692	35.83	0.0824659	2	1044.51	-0.361253	62.6917	0	C1203	40.74	B1503	2.8	B1503	0.01
High	EAASILQEL	9	1	1	O00232		0	1.4451e+07	0.005	0.01832	34.58	0.160113	2	973.52	0.0275959	78.6856	0	C1203	85.19	A6802	27	A6802	0.25
High	ETSTVITHV	11	1	1	Q8WXI7		0	3.3566e+07	0.005	0.01849	32.66	0.207099	2	986.515	-0.272731	36.1691	0	C1203	74.07	A6802	3.2	A6802	0.01
High	GMYGKIAVM	4	1	1	Q16531		0	7.92414e+06	0.005	0.017	32.62	0.159838	2	969.49	-0.00998238	52.5368	0	C1203	44.44	B1503	11.8	B1503	0.25
High	HSAAPSPQV	8	1	1	Q92614		0	1.07843e+07	0.005	0.01819	32.54	0.239618	2	893.447	-0.447868	25.6985	0	C1203	70.37	A6802	31.7	A6802	0.3
High	HAFWGGSVV	28	1	1	O75179		0	199496149	0.005	0.01834	30.05	0.189209	2	959.473	-0.366076	57.3715	0	C1203	81.48	C1203	6.6	C1203	0.01
High	ETAGFQEGV	10	1	1	Q5TCZ1		0	1.33653e+07	0.005	0.01714	29.17	0.495437	2	937.426	-0.267094	46.961	0	C1203	74.07	A6802	2.3	A6802	0.01
High	DVINVFHHL	6	1	1	Q9UK58		0	1.28361e+07	0.005	0.01809	27.99	0.544316	2	1093.58	-0.702923	61.1209	0	C1203	37.04	A6802	12.3	A6802	0.1
High	ESAPIGIRV	16	1	1	O75054		0	3.24718e+07	0.005	0.01823	27.77	0.413929	2	941.541	-0.216598	49.7478	0	C1203	81.48	A6802	7	A6802	0.04
High	EVFGHAIKA	23	1	1	P54136		0	5.83609e+07	0.005	0.01683	27.05	0.688277	2	971.53	-0.575616	36.9828	0	C1203	11.11	A6802	17.5	A6802	0.17
High	ITFPGIKLI	7	1	1	O75387		0	6.65292e+06	0.005	0.01831	25.62	0.183685	2	1001.64	-0.832532	80.3522	0	C1203	77.78	C1203	39.7	C1203	0.17
High	IQTRGGTF	17	1	1	O14672		0	1.01601e+07	0.005	0.0184	25.5	1.11566	2	879.468	0.113805	28.6951	0	C1203	26.67	B1503	45.7	B1503	1.1
High	VKAEIRQQF	4	1	1	P30154		0	3.75152e+06	0.005	0.01739	25.14	0.832548	2	1118.63	-1.05534	35.0607	0	C1203	40.74	B1503	33.2	B1503	0.8
High	AAIDHQIEV	13	1	1	Q9Y485		0	2.26425e+07	0.005	0.01797	24.11	1.37755	2	995.515	-0.683152	43.0678	0	C1203	88.89	C1203	35.4	C1203	0.17
High	SLFVSNHAY	1	1	1	P04075		0	1.22574e+07	0.005	0.01848	23.97	1.53271	2	1037.5	-0.625703	50.5267	0	C1203	40.74	B1503	7.2	B1503	0.12
High	EVAKIIYIV	10	1	1	P25788		0	41039239	0.005	0.01836	23.62	0.347391	2	1047.64	-0.540825	67.4339	0	C1203	44.44	A6802	3.7	A6802	0.01
High	TAVTVNQSL	25	1	1	P05787		0	4.29733e+07	0.005	0.01703	23.47	1.93698	2	932.505	-0.22209	47.428	0	C1203	74.07	C1203	436.7	C1203	1.5
High	SKFGTGNKY	6	1	1	P14735		0	1.83187e+06	0.005	0.01709	23	2.10023	2	1001.5	-0.292519	21.8595	0	C1203	44.44	B1503	15.2	B1503	0.4
High	FLFDGSPTYV	3	1	1	P49327		0	2.5955e+07	0.005	0.01762	22.69	1.79163	2	1145.55	0.254935	90.0473	0	C1203	54.29	A6802	43.4	C1203	0.25
High	FMISWLPY	1	1	1	Q96RI8		0	1.7126e+06	0.005	0.0178	22.48	1.76232	2	1056.52	-1.80589	95.2733	0	C1203	36.67	B1503	11	B1503	0.25
High	QAKMMTNLV	1	1	1	Q9UBP0		0	2.55891e+06	0.005	0.01779	22.47	2.45436	2	1035.53	0.617483	80.3555	0	C1203	74.07	A6802	432	A6802	2
High	ETSSIMQKL	14	1	1	Q5VT06		0	1.07963e+08	0.005	0.01822	21.72	2.85308	2	1036.53	-0.727777	46.1534	0	C1203	74.07	A6802	22.9	A6802	0.25
High	TTAEVVVTEI	4	1	1	P10809		0	1.60044e+07	0.005	0.01785	20.9	2.98349	2	1061.57	-0.0904375	66.6932	0	C1203	28.57	A6802	13.7	A6802	0.12
High	SKYAADRNHY	9	1	1	P67809		0	1.91193e+06	0.005	0.01841	20.89	2.89383	3	1224.58	0.394565	19.347	0	C1203	31.43	B1503	31.6	B1503	0.8
High	EVVAVRQEL	8	1	1	Q10586		0	1.03789e+07	0.005	0.0169	20.63	2.64377	2	1042.59	-0.733554	46.5589	0	C1203	40.74	A6802	45.1	A6802	0.4
High	EVFGLFQKL	19	1	1	P15924		0	3.37711e+07	0.005	0.01819	20.38	2.22596	2	1080.61	-0.0453937	77.409	0	C1203	44.44	A6802	30.7	A6802	0.3
High	GQMPHSHQY	3	1	1	Q13627		0	871514	0.005	0.01839	20.06	1.869	2	1084.46	-0.537988	21.0366	0	C1203	44.44	B1503	3.3	B1503	0.02
High	RQLPSSHAL	5	1	1	Q8WV83		0	4.6775e+06	0.005	0.01758	19.75	2.58246	2	1008.56	-0.203386	26.5718	0	C1203	44.44	B1503	5.1	B1503	0.06
High	TTTHVTKTV	2	1	1	Q9H4G0		0	714991	0.005	0.01708	19.56	5.05727	2	987.547	0.0226155	18.5501	0	C1203	74.07	A6802	24.2	A6802	0.25
High	KKVVKETSY	4	1	1	Q9NZJ7		0	501109	0.005	0.01766	18.92	2.10815	2	1081.62	-0.612026	17.6119	0	C1203	37.04	B1503	31.5	B1503	0.8
High	RQLPAMTAL	15	1	1	Q13045		0	2.41225e+07	0.005	0.01726	18.79	3.09844	2	1000.56	-0.21567	51.6887	0	C1203	44.44	B1503	4.8	B1503	0.05
High	ESSDVIRLI	1	1	1	Q2TAY7		0	8.98164e+06	0.005	0.01795	18.37	5.59551	2	1031.57	-0.15089	64.8301	0	C1203	74.07	A6802	42.7	A6802	0.4
High	ESIRFFVNV	11	1	1	Q8NBS3		0	3.3609e+07	0.005	0.01845	16.97	6.73147	2	1110.59	-0.316615	72.3354	0	C1203	70.37	A6802	3.4	A6802	0.01
High	MKFIDNTLY	2	1	1	Q14116		0	7.46653e+06	0.005	0.01847	13.86	16.5549	2	1144.57	-0.981699	63.7152	0	C1203	40.74	B1503	6.1	B1503	0.08
High	KAYGKAKSI	3	2	2	Q99613;B5ME19		0	848697	0.006	0.01874	45.76	0.00321871	2	965.578	-0.267216	17.1663	0	C1203	77.78	C1203	73.9	C1203	0.4
High	RKVPGVTAI	16	3	3	Q06787;P51114;P51116		0	1.595e+07	0.006	0.01882	40.34	0.00846099	2	940.593	-0.672998	31.8972	0	C1203	40.74	B1503	21.4	B1503	0.6
High	TASPLVKSV	21	1	1	Q6P4F7		0	1.83758e+07	0.006	0.01903	39.52	0.0332993	2	901.535	-0.298958	35.1456	0	C1203	92.59	C1203	131.3	C1203	0.6
High	AKVSGGPSL	1	1	1	Q9Y262		0	2.49991e+06	0.006	0.01903	39.21	0.0593692	2	815.462	-0.281606	28.5232	0	C1203	44.44	B1503	26.2	B1503	0.7
High	DTFRGVAFV	20	1	1	O15067		0	2.4452e+08	0.006	0.01861	38.62	0.0510388	2	1011.53	-0.780294	65.5638	0	C1203	74.07	A6802	3.7	A6802	0.01
High	AAADVLEFV	12	1	1	P53618		0	5.84557e+06	0.006	0.01882	36.29	0.127139	2	934.488	0.00364705	86.5884	0	C1203	85.19	A6802	15.8	A6802	0.15
High	DTFSGQFVL	28	1	1	Q5T089		0	2.72793e+07	0.006	0.02001	32.37	0.22702	2	1013.49	-0.239165	87.2242	0	C1203	77.78	A6802	31.5	A6802	0.3
High	GKAWGILTF	5	1	1	P82930		0	6.52314e+06	0.006	0.01953	32.14	0.181389	2	992.556	-0.60205	76.1639	0	C1203	44.44	B1503	9	B1503	0.17
High	LKSGGVNQY	5	1	1	Q15021		0	3.08259e+06	0.006	0.01877	30.98	0.282011	2	965.503	-2.01026	25.5317	0	C1203	48.15	B1503	22.1	B1503	0.6
High	HSSGINVNA	9	1	1	Q14444		0	1.80579e+08	0.006	0.01857	30.46	0.257931	2	898.437	-1.10988	27.9367	0	C1203	40.74	A6802	54.6	A6802	0.5
High	ELFSGGNTGI	1	2	2	O00571;O15523		0	1.29544e+07	0.006	0.01865	30	0.4343	2	994.483	-0.608621	66.6995	0	C1203	25.71	A6802	297.4	A6802	1.6
High	MVYSLPILV	1	1	1	Q8WWZ7		0	1.54041e+08	0.006	0.01897	29.77	0.270187	2	1034.59	-3.89819	106.431	0	C1203	51.85	A6802	6.2	A6802	0.03
High	GQVQKIVLY	2	1	1	Q00610		0	9.64697e+06	0.006	0.01915	29.52	0.172276	2	1047.62	-1.46011	50.0136	0	C1203	44.44	B1503	10.4	B1503	0.25
High	HKIEAGNEF	10	1	1	O43293		0	9148114	0.006	0.01999	29	0.434896	2	1044.51	-0.602957	26.8889	0	C1203	37.04	B1503	13.9	B1503	0.4
High	TATEIAINV	3	1	1	Q86XP1		0	9.13089e+06	0.006	0.02009	28.96	0.555495	2	931.51	-0.0249617	63.1425	0	C1203	81.48	A6802	21.8	A6802	0.2
High	SAFPAVQYL	8	1	1	Q13227		0	9.47963e+06	0.006	0.0194	28.05	0.74358	2	995.52	-0.174267	80.3555	0	C1203	88.89	C1203	6.3	C1203	0.01
High	KAFPKAYLL	9	1	1	Q66K89		0	32833955	0.006	0.0186	27.27	0.1665	2	1050.63	-0.910602	50.6716	0	C1203	85.19	C1203	33.7	C1203	0.15
High	TAAPPAQPL	12	1	1	P25440		0	1.64253e+07	0.006	0.01913	27.24	0.657493	2	865.478	-0.0121299	43.1592	0	C1203	85.19	C1203	72	C1203	0.4
High	LSKDGVLYV	13	1	1	Q9H1A4		0	3.82556e+07	0.006	0.01878	27.1	0.409955	2	993.561	-0.850231	50.9233	0	C1203	77.78	C1203	67.2	C1203	0.3
High	RSFHEVREF	7	1	1	Q92963		0	7.62025e+06	0.006	0.01873	26.39	1.12775	3	1206.6	-0.0814442	29.6638	0	C1203	74.07	B1503	7.4	B1503	0.12
High	KKRPKAESF	4	1	1	P13798		0	399997	0.006	0.01863	26.29	0.3676	2	1090.64	-0.600845	16.9405	0	C1203	37.04	B1503	30.1	B1503	0.8
High	ELGGIIAEV	15	1	1	Q96RL7		0	1.41019e+07	0.006	0.01904	24.88	1.06417	2	900.503	-0.362872	76.4729	0	C1203	48.15	A6802	74	A6802	0.6
High	AAADFTAKV	2	1	1	Q9Y3F4		0	5.79195e+07	0.006	0.01869	24.27	1.78544	2	893.473	-0.200926	39.3565	0	C1203	85.19	A6802	22.8	C1203	0.17
High	QFTGIKKY	2	1	1	Q96IX5		0	1.07707e+07	0.006	0.01879	23.21	1.43903	2	984.551	-0.438186	43.7041	0	C1203	33.33	B1503	208.3	B1503	3
High	KKFNEPGSQY	4	1	1	P51531		0	2.10714e+06	0.006	0.01954	22.19	2.17663	2	1197.59	-0.110239	26.1523	0	C1203	40	B1503	26.1	B1503	0.7
High	HSAPFSWET	8	1	1	Q9H425		0	3.41663e+07	0.006	0.01872	22.18	1.10535	2	1061.47	-0.388125	52.1992	0	C1203	44.44	A6802	94.4	A6802	0.8
High	KLNGQVLVF	3	1	1	Q15459		0	1.74464e+07	0.006	0.01891	22.04	1.07061	2	1017.61	-0.672389	59.6787	0	C1203	44.44	B1503	12.1	B1503	0.3
High	YSFYLPIAA	9	1	1	P14324		0	1.75399e+07	0.006	0.01861	22.02	2.46262	2	1044.54	-0.929789	91.9982	0	C1203	44.44	C1203	17.5	C1203	0.06
High	RQSPHSNLF	5	1	1	O43929		0	1.37567e+06	0.006	0.01892	21.97	2.352	2	1085.55	-0.514024	27.4655	0	C1203	40.74	B1503	2.1	B1503	0.01
High	AKYPIKQSL	12	1	1	P21283		0	9.16582e+06	0.006	0.0188	21.58	1.07208	2	1047.62	-1.57663	31.486	0	C1203	51.85	B1503	134.5	B1503	2.5
High	KQYKVVVY	11	1	1	P08754		0	7.88783e+06	0.006	0.01887	21.39	1.62757	2	1026.6	-0.424101	32.3574	0	C1203	30	B1503	6.9	B1503	0.12
High	YQTAPKAGY	3	1	1	Q96KR1		0	2.44722e+06	0.006	0.01851	21.25	2.89647	2	998.494	-0.553226	29.9622	0	C1203	40.74	B1503	6.6	B1503	0.1
High	RKPDQVFQSY	7	1	1	Q96K76		0	5.68791e+06	0.006	0.01856	20.25	3.76964	3	1267.64	0.704232	36.2087	0	C1203	40	B1503	132.6	B1503	2.5
High	AKAYPPTSM	2	1	1	Q8NCW5		0	7.37808e+06	0.006	0.0193	19.75	5.17763	2	965.476	0.0637537	32.962	0	C1203	40.74	B1503	14	B1503	0.4
High	RAYPTVKFY	1	1	1	Q8IXB1		0	7.4949e+06	0.006	0.01888	19.71	3.65403	2	1144.61	-0.163904	46.9184	0	C1203	92.59	B1503	8.8	C1203	0.04
High	MVNYNPETV	4	1	1	P27708		0	2.92062e+07	0.006	0.01888	19.49	3.94905	2	1066.49	-0.513176	56.1693	0	C1203	44.44	A6802	24.9	C1203	0.2
High	EAADIIQKL	15	1	1	O00471		0	36533578	0.006	0.0185	19.21	4.19885	2	1000.57	-0.326914	56.3485	0	C1203	85.19	A6802	44.8	A6802	0.4
High	FSIPYIISY	1	1	1	Q6P587		0	1.3533e+07	0.006	0.01872	19	4.84686	2	1102.58	0.0140384	99.6287	0	C1203	85.19	C1203	6.7	C1203	0.01
High	KKIPSTVEF	15	1	1	Q9H2G9		0	1.04051e+07	0.006	0.01887	18.69	3.33894	2	1048.6	0.500041	36.3157	0	C1203	44.44	B1503	4.6	B1503	0.04
High	EVYTPKEIFV	1	1	1	O95297		0	1.64898e+07	0.006	0.01903	18.58	3.89748	2	1224.65	0.247814	66.6348	0	C1203	31.43	A6802	14.8	A6802	0.15
High	RQSVAGTY	5	1	1	Q9BX59		0	1.84604e+06	0.006	0.01872	18.01	6.14789	2	881.448	0.0420893	24.2939	0	C1203	30	B1503	11.9	B1503	0.25
High	KKVERQTEL	5	2	2	P11940;Q9H361		0	2.79034e+06	0.006	0.02013	17.95	4.25501	2	1130.65	-0.622731	17.44	0	C1203	44.44	B1503	209.3	B1503	3
High	YKEKTGKEY	1	1	1	P07814		0	313536	0.006	0.01859	16.86	9.86527	2	1145.58	-0.172495	17.1773	0	C1203	48.15	B1503	219.7	B1503	3
High	TVADHIQKV	6	1	1	Q9Y678		0	3.38397e+06	0.006	0.01871	16.37	5.90181	2	1010.56	-0.590569	27.2537	0	C1203	48.15	A6802	15.5	A6802	0.15
High	VSMGELWAF	1	1	1	O43246		0	1.76109e+07	0.006	0.01862	14.45	12.4079	2	1039.49	2.07099	79.4536	0	C1203	66.67	B1503	26.6	B1503	0.7
High	VQIPPSTTY	7	1	1	Q12906		0	0	0.006	0.01902	14.26	16.6094	2	1005.52	-2.03119	55.432	0	C1203	51.85	B1503	2.3	B1503	0.01
High	QERPSVTSY	6	1	1	Q9UJX3		0	1.03076e+07	0.006	0.01868	14	13.886	2	1066.52	-0.444963	32.5834	0	C1203	48.15	B1503	17	B1503	0.5
High	ESFDSKFYV	8	1	1	Q5VV42		0	3.23609e+07	0.006	0.01921	13.2	14.6221	2	1121.51	-0.272189	60.3685	0	C1203	74.07	A6802	3.1	A6802	0.01
High	AAKDPSPSV	3	1	1	O75153		0	1.36303e+06	0.007	0.02334	41.63	0.0255486	2	871.452	-0.00960376	23.3786	0	C1203	81.48	C1203	463.4	C1203	1.6
High	AAFDKIQQL	8	1	1	Q9P2I0		0	2.17155e+07	0.007	0.02255	41.56	0.027657	2	1033.57	-1.10818	55.9331	0	C1203	88.89	C1203	26.1	C1203	0.1
High	FTAGIVEAVL	11	1	1	Q8IUR0		0	3.52044e+07	0.007	0.02312	40.57	0.025968	2	1019.58	-0.0944498	86.3965	0	C1203	60	A6802	14.2	A6802	0.12
High	TTTQITKTV	24	1	1	P11171		0	2.55657e+07	0.007	0.02316	39.14	0.0231608	2	992.562	-0.654094	28.362	0	C1203	74.07	A6802	44.9	A6802	0.4
High	SNSDVIIYV	6	1	1	P38606		0	6.11779e+07	0.007	0.02044	33.31	0.146928	2	1009.52	-0.437254	71.6753	0	C1203	51.85	A6802	71.1	A6802	0.6
High	MSLPENLKL	1	1	1	Q7Z4V0		0	2.27274e+08	0.007	0.02332	32.81	0.273189	2	1044.57	-3.27024	82.7804	0	C1203	77.78	C1203	405.3	C1203	1.4
High	AATPAVRTV	27	2	2	P11940;Q9H361		0	1.08531e+08	0.007	0.02147	32.71	0.17467	2	885.515	0.0170385	29.6116	0	C1203	96.3	C1203	70.3	C1203	0.4
High	EAAELMQQV	10	1	1	Q15691		0	1.79124e+07	0.007	0.02275	31.87	0.244579	2	1018.49	-0.257361	57.6354	0	C1203	81.48	A6802	8.4	A6802	0.06
High	GAYEQVIKY	19	1	1	P98194		0	3.93087e+07	0.007	0.02283	31.28	0.310851	2	1070.55	-1.16637	49.4928	0	C1203	88.89	B1503	35.1	C1203	0.5
High	ESVSIFSSA	13	1	1	Q15800		0	9.64429e+07	0.007	0.02206	30.81	0.206757	2	926.447	-0.0113316	65.6406	0	C1203	33.33	A6802	7.5	A6802	0.05
High	AKSGVGTAL	1	1	1	P02786		0	2.03764e+06	0.007	0.02034	29.35	0.35581	2	803.462	-0.361777	25.4355	0	C1203	48.15	B1503	53.4	B1503	1.2
High	TVFSHAQTV	14	2	2	Q71UM5;P42677		0	8.20243e+07	0.007	0.02321	29.32	0.587732	2	989.505	-0.172701	34.8938	0	C1203	48.15	C1203	18	C1203	0.06
High	QVANVRFNV	14	1	1	P30154		0	3.61734e+07	0.007	0.02041	28.95	0.490872	2	1046.57	0.178792	48.8229	0	C1203	40.74	A6802	4.6	A6802	0.01
High	FASEYPLIL	2	1	1	Q9UPR0		0	1.14754e+07	0.007	0.02154	27.66	0.4482	2	1052.57	-0.212492	88.9501	0	C1203	92.59	C1203	8.6	C1203	0.01
High	RAYPDANLL	9	1	1	P24385		0	1.20776e+07	0.007	0.02259	26.91	0.911373	2	1032.55	-0.494672	51.5069	0	C1203	85.19	C1203	14.8	C1203	0.05
High	ITAPPSRVL	12	1	1	O00767		0	3.31158e+07	0.007	0.02045	26.26	0.273145	2	953.578	-0.345072	42.8244	0	C1203	85.19	C1203	72.7	C1203	0.4
High	EVFLKAFAV	14	1	1	O95373		0	1.35034e+07	0.007	0.02186	25.39	0.604297	2	1023.59	-0.429508	72.4332	0	C1203	40.74	A6802	5.6	A6802	0.03
High	KAFGSTIVI	5	1	1	Q13620		0	1.32395e+07	0.007	0.02277	25.38	0.418376	2	935.556	-0.144832	54.644	0	C1203	81.48	C1203	17.8	C1203	0.06
High	SQVPRSSSM	3	1	1	Q9H992		0	1.9754e+06	0.007	0.02243	25.24	1.20469	2	978.467	-0.767494	24.1431	0	C1203	37.04	B1503	3.5	B1503	0.02
High	YQKQPKIGY	2	1	1	Q68E01		0	3.52305e+06	0.007	0.02292	25.02	0.983042	2	1124.61	-0.199679	29.8049	0	C1203	44.44	B1503	9.2	B1503	0.17
High	VTHFIQAGLL	1	1	1	P55061		0	1.17505e+07	0.007	0.02261	24.19	0.861209	2	1098.63	-0.211725	96.4235	0	C1203	45.71	A6802	273	A6802	1.5
High	RKSLNSIEF	13	1	1	P78527		0	1.40725e+07	0.007	0.02125	23.69	1.25746	2	1093.6	-0.946122	41.7099	0	C1203	40.74	B1503	9.5	B1503	0.2
High	GKVKSGGTYF	1	1	1	P55017		0	4.05878e+06	0.007	0.02293	23.58	1.90169	2	1043.55	-1.29799	27.9606	0	C1203	31.43	B1503	59.1	B1503	1.3
High	TSYPDPILL	20	1	1	P50591		0	2.96177e+07	0.007	0.02208	23.52	1.81432	2	1018.55	-0.411097	83.3361	0	C1203	85.19	C1203	34.2	C1203	0.15
High	SVFGQVERA	3	1	1	Q15233		0	2.94311e+06	0.007	0.02313	23.08	1.82547	2	992.518	1.49353	42.2415	0	C1203	11.11	A6802	160.3	A6802	1.1
High	EVSRVLEQV	1	1	1	Q96R06		0	1.42623e+07	0.007	0.02336	22.82	2.11806	2	1058.58	-0.296119	46.503	0	C1203	40.74	A6802	5.6	A6802	0.03
High	STIGQAFEL	16	2	2	P29353;Q6S5L8		0	2.2037e+07	0.007	0.02083	22.72	2.47824	2	965.493	-0.756788	74.2592	0	C1203	74.07	A6802	37.5	A6802	0.4
High	GKKLFGEGY	2	1	1	Q92624		0	5.38545e+06	0.007	0.02251	22.25	2.13515	2	998.53	-0.525176	37.6301	0	C1203	37.04	B1503	308.1	B1503	4
High	RGFDKAYVV	2	1	1	O75531		0	8.71942e+06	0.007	0.02202	21.11	2.3896	2	1054.57	-0.473008	37.842	0	C1203	48.15	C1203	182.6	C1203	0.8
High	EVYPGQQYL	8	1	1	Q8NF64		0	6.14975e+07	0.007	0.02339	20.95	3.46521	2	1096.53	-0.481695	67.2641	0	C1203	48.15	A6802	21.3	A6802	0.2
High	ESAGPSRAV	5	1	1	P50402		0	3.17134e+06	0.007	0.02284	20.67	3.99251	2	873.443	0.175457	21.3142	0	C1203	77.78	A6802	15	A6802	0.15
High	SSHFVPVFV	7	1	1	P32942		0	6.47025e+07	0.007	0.02091	20.57	3.83512	2	1018.54	-0.588612	64.5565	0	C1203	74.07	A6802	23.8	A6802	0.25
High	ETAPDSYKV	16	1	1	Q14244		0	1.42516e+08	0.007	0.02291	19.64	4.30388	2	1009.48	-1.03887	34.1875	0	C1203	77.78	A6802	3.8	A6802	0.01
High	RQKDVKDGKY	8	1	1	P62269		0	570152	0.007	0.02043	19.32	3.70147	2	1236.67	-0.360904	16.1024	0	C1203	34.29	B1503	113.7	B1503	2
High	EIADLNVRI	9	1	1	Q6KB66		0	3.71939e+07	0.007	0.0224	19.28	3.6224	2	1042.59	-0.382302	63.0883	0	C1203	40.74	A6802	10.1	A6802	0.08
High	TTTHITKTV	13	2	2	O43491;Q9Y2J2		0	5.82432e+06	0.007	0.02317	19.2	5.20881	2	1001.56	-0.185482	21.3617	0	C1203	74.07	A6802	19.2	A6802	0.17
High	KKFKGDLAY	5	2	2	Q96K31;Q96EF9		0	2.90725e+06	0.007	0.02314	18.99	3.44984	2	1069.6	-0.388935	25.0134	0	C1203	44.44	B1503	3.4	B1503	0.02
High	ESFIKAIGV	9	1	1	Q9NRN7		0	1.48448e+07	0.007	0.0228	18.8	3.8882	2	963.551	-0.062665	62.796	0	C1203	74.07	A6802	10.4	A6802	0.08
High	GKAFSQKQY	2	1	1	Q15072		0	917602	0.007	0.02197	18.47	5.27328	2	1056.55	-1.05166	22.3605	0	C1203	44.44	B1503	99.7	B1503	1.9
High	VAHSPPSTL	4	1	1	Q03252		0	8.5681e+06	0.007	0.02318	17.94	6.52418	2	908.484	-0.14775	30.5382	0	C1203	88.89	C1203	44.8	C1203	0.2
High	KGFAFVEY	3	1	1	Q9UHX1		0	5.47598e+06	0.007	0.02207	17.85	7.28586	2	960.482	-0.179974	60.7345	0	C1203	40	B1503	237.5	B1503	3.5
High	MTTKLISEL	10	1	1	Q5UIP0		0	5.93114e+07	0.007	0.02205	17.74	3.37881	2	1035.57	-0.612799	57.5044	0	C1203	74.07	A6802	25.4	A6802	0.25
High	HTSPLTQIRL	10	1	1	Q96BP3		0	2.23619e+07	0.007	0.02159	17.67	3.08658	2	1165.67	-0.585828	48.6729	0	C1203	51.43	A6802	124.2	A6802	0.9
High	KKSKENVLY	3	1	1	P62191		0	597472	0.007	0.02256	16.6	4.04955	2	1108.64	-0.519246	20.3577	0	C1203	44.44	B1503	32.1	B1503	0.8
High	EASSVKNEL	6	1	1	Q9P2D1		0	1.0863e+07	0.007	0.02314	15.92	10.4915	2	976.494	-0.308252	27.9986	0	C1203	85.19	A6802	223.2	A6802	1.3
High	DVAEVLWEI	3	1	1	Q9Y5L0		0	1.71732e+06	0.007	0.02184	15.58	10.4134	2	1073.55	-0.883668	105.068	0	C1203	40.74	A6802	6.8	A6802	0.04
High	NVFQGIMDSL	2	1	1	Q9UH92		0	1.28647e+06	0.007	0.02194	14.84	13.1484	2	1123.55	0.374347	96.8502	0	C1203	45.71	A6802	80.9	A6802	0.7
High	ETSPVLQKL	14	1	1	Q9NRR4		0	239881031	0.007	0.0224	14.65	9.59236	2	1014.58	-0.577814	46.032	0	C1203	77.78	A6802	25.9	A6802	0.25
High	RKYHQRPTF	3	1	1	O75369		0	1.61007e+06	0.007	0.02247	11.98	28.1787	3	1232.66	0.054562	20.9739	0	C1203	37.04	B1503	5.6	B1503	0.07
High	AQVVQWVSF	1	1	1	P26641		0	4.39009e+06	0.007	0.02303	11.04	32.7765	2	1063.56	-0.435403	84.5558	0	C1203	37.04	B1503	4.7	B1503	0.05
High	EVFSSFAHA	5	1	1	O60502		0	6.45573e+07	0.008	0.0242	54.11	0.00121316	2	994.463	0.456698	51.849	0	C1203	7.41	A6802	6.6	A6802	0.04
High	ESSYIFVSV	4	1	1	P42336		0	8739766	0.008	0.02348	39.55	0.037845	2	1030.51	-0.334436	79.9461	0	C1203	74.07	A6802	2.7	A6802	0.01
High	KGmQDFNYL	1	1	1	P15169	M3(Oxidation)	0	2.01112e+07	0.008	0.02602	36.91	0.0427881	2	1131.51	-3.13097	60.0828	0	C1203	37.04	B1503	303.9	C1203	3
High	EVFFDGVRV	9	1	1	P49748		0	3.02204e+07	0.008	0.0243	35.78	0.103305	2	1067.55	-0.487123	68.2447	0	C1203	44.44	A6802	8.9	A6802	0.06
High	EVFPEFAAA	18	1	1	O15294		0	2.03328e+07	0.008	0.02372	32.49	0.246366	2	980.472	-0.28228	75.9523	0	C1203	11.11	A6802	7.5	A6802	0.05
High	LAFGFAVTL	2	1	1	Q92482		0	5.1224e+06	0.008	0.02388	31.87	0.151708	2	938.535	0.0247538	100.42	0	C1203	88.89	C1203	10.8	C1203	0.03
High	GKSFTSNSY	2	2	2	Q8N988;Q96NG5		0	4.58671e+06	0.008	0.02439	31.53	0.248852	2	990.452	-0.530327	31.1581	0	C1203	40.74	B1503	12.9	B1503	0.3
High	EVPPPFTLV	40	1	1	Q8NI35		0	85629825	0.008	0.02387	31.51	0.18947	2	998.556	-0.110834	86.7087	0	C1203	44.44	A6802	6.1	A6802	0.03
High	EVSKIIKRA	11	1	1	O60502		0	5.12365e+06	0.008	0.02522	30.33	0.0902269	2	1043.66	-0.524589	21.8364	0	C1203	11.11	A6802	263.3	A6802	1.5
High	STIGIDFKI	1	4	4	P61026;P51153;P61006;Q92930		0	8.80839e+06	0.008	0.02349	29.92	0.229132	2	993.562	-0.0616961	71.0606	0	C1203	62.96	A6802	13.3	A6802	0.12
High	SQQPASGVAY	9	1	1	Q96KR1		0	1.0333e+07	0.008	0.02361	28.32	0.579208	2	1007.48	-0.288671	38.6784	0	C1203	34.29	B1503	6.4	B1503	0.09
High	DTSSLFDKL	13	1	1	Q16665		0	9.41444e+06	0.008	0.02571	28.21	0.497118	2	1025.51	-0.188387	68.55	0	C1203	74.07	A6802	101.8	A6802	0.8
High	ETFPANIQVV	1	1	1	Q5VYK3		0	4.60794e+07	0.008	0.02394	27.13	1.01304	2	1117.59	0.166033	75.2824	0	C1203	60	A6802	8.4	A6802	0.06
High	STSAVNHNV	9	1	1	Q07157		0	8.62533e+06	0.008	0.02394	26.67	0.705574	2	928.448	-0.220388	19.884	0	C1203	70.37	A6802	5.3	A6802	0.02
High	DSFNYFINV	9	1	1	Q9NW08		0	7.52113e+06	0.008	0.02449	26.6	0.707522	2	1118.52	0.632543	94.2507	0	C1203	74.07	A6802	9.5	A6802	0.07
High	TAFPKPLLT	9	1	1	Q9BZG8		0	2.32199e+07	0.008	0.02411	26.53	0.591067	2	987.586	-1.67109	56.0566	0	C1203	55.56	C1203	345.5	C1203	1.3
High	ETQSRTITV	7	1	1	Q09666		0	1.9887e+07	0.008	0.02465	24.02	1.65882	2	1034.55	-0.870692	30.7979	0	C1203	77.78	A6802	27.7	A6802	0.25
High	AAINFQPKM	3	1	1	Q96RK4		0	1.91075e+07	0.008	0.02353	22.57	1.95001	2	1019.53	-1.46913	54.1906	0	C1203	70.37	B1503	217.6	C1203	1.2
High	RKPCSVTSY	1	1	1	P37088		0	3.78301e+06	0.008	0.02385	22.16	1.82897	2	1040.52	-0.621751	25.6047	0	C1203	40.74	B1503	14.4	B1503	0.4
High	RQYEQQTY	5	1	1	Q9Y262		0	5.22514e+07	0.008	0.02381	21.38	1.76377	2	1115.51	-0.0888309	26.6167	0	C1203	26.67	B1503	5.5	B1503	0.07
High	LVPEFVHNV	3	1	1	Q9HCD6		0	2.63048e+07	0.008	0.02467	20.04	3.18255	2	1053.57	-0.694985	60.0701	0	C1203	44.44	A6802	12	A6802	0.1
High	KASEKILQV	2	1	1	Q13428		0	8.76516e+06	0.008	0.0236	19.71	2.00448	2	1015.61	-0.660748	34.3255	0	C1203	88.89	C1203	127.6	C1203	0.6
High	ETYRGGMAI	7	1	1	Q13057		0	1.79975e+07	0.008	0.02397	19.52	3.30982	2	997.477	-0.521482	40.5058	0	C1203	62.96	A6802	11.1	A6802	0.09
High	HTFYNELRV	2	10	10	Q562R1;Q9BYX7;P60709;P68032;P63261;P68133;Q6S8J3;A5A3E0;P0CG38;P0CG39		0	3.09522e+07	0.008	0.0238	19.36	4.6971	2	1178.59	-0.559318	49.7914	0	C1203	74.07	A6802	11.1	A6802	0.09
High	RKRPVPKGATY	5	1	1	P61313		0	5.92043e+06	0.008	0.0255	18.83	2.1608	3	1272.75	-0.0217058	19.3964	0		0	B1503	142.7	B1503	2.5
High	KTKEGVLYV	4	2	2	P37840;Q16143		0	1.91071e+07	0.008	0.02415	18.67	1.91454	2	1036.6	-0.662122	35.6997	0	C1203	77.78	C1203	217.2	C1203	0.9
High	ETFYIGKLI	17	1	1	Q7KZ85		0	1.75837e+07	0.008	0.0244	18.15	3.39748	2	1083.61	-0.17288	74.8781	0	C1203	66.67	A6802	19.4	A6802	0.17
High	GKAFSQSAY	2	3	3	Q6ZN57;O14709;Q9NQZ8		0	1.90202e+06	0.008	0.02595	17.97	5.86166	2	958.462	-0.598279	29.9303	0	C1203	40.74	B1503	12.5	B1503	0.3
High	EVSSINQEAL	3	1	1	Q9NRG0		0	1.66818e+07	0.008	0.02366	17.64	7.23701	2	1089.54	-0.342882	52.1716	0	C1203	28.57	A6802	57.1	A6802	0.5
High	RANPFNTPH	2	1	1	Q00325		0	3.77592e+06	0.008	0.02398	16.83	6.95822	2	1053.52	-0.794721	27.3261	0	C1203	44.44	B1503	127.1	B1503	2.5
High	ESIKNQMTV	2	1	1	Q14566		0	1.56581e+07	0.008	0.02351	15.47	13.3723	2	1049.53	-0.612691	35.9605	0	C1203	70.37	A6802	32.9	A6802	0.3
High	LRNQLQSVY	6	1	1	Q9BSM1		0	2.62293e+07	0.008	0.02612	15.19	10.405	2	1120.61	-0.937365	39.5766	0	C1203	40.74	B1503	11.9	B1503	0.25
High	DVNFSIISKV	1	1	1	Q9NQW8		0	3.21067e+06	0.008	0.02584	13.2	13.7606	2	1121.62	0.0120239	89.7584	0	C1203	22.86	A6802	59.3	A6802	0.5
High	RSFPGSKEY	1	1	1	Q14517		0	3.68647e+06	0.008	0.0254	10.38	31.3622	2	1070.53	-1.40052	27.1293	0	C1203	85.19	B1503	6.5	B1503	0.09
High	KRFEPGTQRF	2	1	1	Q70IA8		0	2.16618e+06	0.008	0.02395	10.04	35.3479	3	1265.67	-0.241016	27.3431	0	C1203	45.71	B1503	42.6	B1503	1
High	RKGAGSVF	7	1	1	P62917		0	1.12945e+07	0.009	0.03556	41.25	0.0181249	2	821.463	0.167943	21.8775	0	C1203	36.67	B1503	126.3	B1503	2.5
High	KAFGWPSSL	8	1	1	Q9HAH1		0	34059964	0.009	0.03176	36.83	0.0869804	2	992.52	0.149015	64.0524	0	C1203	85.19	C1203	8.6	C1203	0.01
High	EVAGIINDA	23	1	1	Q14008		0	1.1821e+08	0.009	0.04	34.54	0.140747	2	901.462	-0.224516	54.6912	0	C1203	11.11	A6802	11.6	A6802	0.09
High	AARPATSTL	9	1	1	Q04637		0	1.97082e+07	0.009	0.02658	34.5	0.187377	2	887.494	-0.134013	25.151	0	C1203	88.89	C1203	72.5	C1203	0.4
High	SIIPPLFTV	11	1	1	P51571		0	4.52368e+06	0.009	0.03807	31.91	0.160334	2	986.592	-0.362725	99.5363	0	C1203	48.15	A6802	10.6	A6802	0.08
High	EIMPASENV	3	1	1	Q9UGM1		0	2.17586e+07	0.009	0.02887	30.96	0.235252	2	989.461	-0.265207	53.2759	0	C1203	44.44	A6802	5.8	A6802	0.03
High	DVIYPMAVV	18	1	1	P78406		0	3.42194e+07	0.009	0.02783	30.93	0.372902	2	1006.53	-0.376459	88.2135	0	C1203	40.74	A6802	9.5	A6802	0.07
High	NAFHHPSAV	3	1	1	P32314		0	2.66166e+06	0.009	0.02843	28.81	0.642619	2	979.474	-0.371263	24.6108	0	C1203	81.48	C1203	16.1	C1203	0.06
High	IGAARTKTY	6	1	1	Q9Y3B1		0	1.48087e+06	0.009	0.03166	28.75	0.341515	2	980.552	-0.224035	20.6325	0	C1203	48.15	B1503	91.2	C1203	0.9
High	FTTHILEVI	1	1	1	P15927		0	1.57237e+08	0.009	0.03215	28.47	0.59816	2	1072.6	-0.412284	72.1141	0	C1203	66.67	A6802	21.4	C1203	0.17
High	EAVSVIQSI	9	1	1	Q9P035		0	56446603	0.009	0.02808	28.21	0.601314	2	945.525	-0.180135	67.2978	0	C1203	74.07	A6802	29.9	A6802	0.3
High	EAIQLIARI	3	1	1	P36871		0	8.50422e+06	0.009	0.03901	27.56	0.220814	2	1026.63	-0.830834	66.2393	0	C1203	70.37	A6802	50	A6802	0.5
High	ETADITHAL	14	1	1	Q15042		0	3.69033e+07	0.009	0.03593	25.84	0.921275	2	970.484	0.0155467	47.566	0	C1203	74.07	A6802	2.4	A6802	0.01
High	RAFGGILVV	5	1	1	Q8NHX9		0	9.26199e+07	0.009	0.03377	25.23	0.303965	2	931.572	-0.247052	65.5199	0	C1203	92.59	C1203	8.7	C1203	0.01
High	VTFSGIHLL	7	1	1	Q8N3Z3		0	6.12457e+06	0.009	0.03481	24.53	1.50603	2	986.566	-0.782098	72.7398	0	C1203	81.48	C1203	35.6	C1203	0.17
High	KQFGNILIL	2	1	1	P52788		0	1.83195e+07	0.009	0.02769	24.26	0.402908	2	1045.64	-0.877295	70.5877	0	C1203	51.85	B1503	4.3	B1503	0.04
High	HIAEVSQEV	5	1	1	P61764		0	5.81918e+06	0.009	0.02708	23.16	1.57719	2	1011.51	-0.769223	35.0884	0	C1203	48.15	A6802	9.9	A6802	0.07
High	EVNKVISSV	15	1	1	Q93008		0	1.19761e+08	0.009	0.02864	23.06	1.40187	2	974.551	-1.05128	38.1996	0	C1203	40.74	A6802	7.9	A6802	0.05
High	SARAGETRF	3	1	1	P13639		0	1.16982e+06	0.009	0.03284	22.26	2.45621	2	994.506	-0.679092	20.4477	0	C1203	66.67	B1503	86.8	B1503	1.7
High	GKSSLIVSY	8	1	1	Q96L33		0	1.05905e+07	0.009	0.03384	21.91	1.26611	2	953.53	-0.182904	45.0007	0	C1203	51.85	B1503	12.6	B1503	0.3
High	VAYWRQAGL	1	2	2	Q5VTU8;P56381		0	2.57752e+06	0.009	0.0334	21.31	2.99725	2	1063.57	-2.84523	54.785	0	C1203	81.48	C1203	82.6	C1203	0.4
High	KAFSRPWLL	2	5	5	Q9BWW7;Q9NQ03;O95863;O43623;Q3KNW1		0	7.69097e+06	0.009	0.02879	20.82	1.47001	2	1117.65	-0.392416	55.1125	0	C1203	85.19	C1203	49.6	C1203	0.25
High	TAMDQVFHV	1	1	1	Q93052		0	1.34638e+07	0.009	0.03828	20.48	3.38224	2	1047.49	0.703176	61.687	0	C1203	81.48	A6802	8.6	A6802	0.06
High	KKIEDNNTL	16	1	1	P62750		0	3.66398e+07	0.009	0.0326	17.66	7.2509	2	1074.58	-0.780493	21.9585	0	C1203	44.44	B1503	104.6	B1503	1.9
High	SKMGKQLTY	1	1	1	O00115		0	0	0.009	0.03358	16.98	6.87935	2	1055.55	-0.890851	25.9475	0	C1203	48.15	B1503	7.8	B1503	0.15
High	AQLLVLYY	4	1	1	Q9H0H0		0	8.97364e+07	0.009	0.03611	16.31	4.73498	2	982.561	-0.158556	89.0297	0	C1203	30	B1503	124.9	B1503	2.5
High	HKGRGQLVY	6	1	1	Q9BX59		0	7.75462e+06	0.009	0.04048	15.88	9.27031	2	1057.59	-0.495553	21.256	0	C1203	44.44	B1503	26.9	B1503	0.7
High	YKASSGLLY	2	1	1	Q08945		0	6.91891e+06	0.009	0.03969	15.82	12.8828	2	1001.53	0.0796144	45.9074	0	C1203	51.85	B1503	3.9	B1503	0.03
High	ETIGVVHLV	6	1	1	Q63HN8		0	8.76758e+07	0.009	0.03867	13.45	8.7163	2	966.561	-0.783716	60.0273	0	C1203	74.07	A6802	2.1	A6802	0.01
High	RHREHLINY	1	1	1	Q5BJD5		0	5.5162e+06	0.009	0.03842	12.57	24.0265	3	1237.65	-0.0828252	24.9022	0	C1203	44.44	B1503	11.7	B1503	0.25
High	ETHNFPTGV	2	1	1	O15067		0	12389394	0.009	0.02819	11.77	19.8085	2	1001.47	-0.53327	41.0273	0	C1203	70.37	A6802	6.1	A6802	0.03
High	EQYESFVKF	1	1	1	Q9H9L7		0	7805411	0.009	0.03475	10.63	29.7116	2	1176.56	-0.124826	64.4209	0	C1203	40.74	B1503	6.2	B1503	0.09
Medium	ETITGQHPA	5	1	1	Q8WTW3		0	2.44615e+06	0.01	0.04812	37.14	0.0668751	2	953.468	-0.304061	23.8806	0	C1203	29.63	A6802	13.6	A6802	0.12
Medium	YTANFVNAI	2	1	1	Q7L1W4		0	2.44351e+07	0.01	0.04884	32.6	0.226905	2	1012.51	0.263799	69.8924	0	C1203	70.37	A6802	4.5	A6802	0.01
Medium	GKSFGTSSY	2	1	1	A8MT65		0	2.05711e+06	0.01	0.04753	30.4	0.388015	2	933.431	-0.327285	29.3018	0	C1203	40.74	B1503	9.9	B1503	0.2
Medium	MMIPSQISY	1	1	1	Q04637		0	1.0935e+07	0.01	0.04687	27.79	0.510418	2	1069.51	0.182957	75.9	0	C1203	48.15	B1503	3.1	B1503	0.01
Medium	AQLHPLSGY	1	1	1	Q7L7V1		0	5.47261e+06	0.01	0.0436	27.05	0.737982	2	985.51	-0.559286	46.2386	0	C1203	40.74	B1503	5.8	B1503	0.08
Medium	RTAPSGSEY	1	1	1	O43660		0	804861	0.01	0.04142	26.82	0.582003	2	967.448	-0.185845	24.1774	0	C1203	81.48	B1503	29.9	C1203	0.4
Medium	KQHVTEAF	5	1	1	O43175		0	1.36243e+06	0.01	0.04303	26.49	1.17041	2	959.494	-0.367982	24.1893	0	C1203	30	B1503	19	B1503	0.5
Medium	AKPEYISKTY	3	1	1	Q13823		0	3.89842e+06	0.01	0.04408	21.86	2.21358	3	1199.63	0.422966	30.0066	0	C1203	31.43	B1503	133.1	B1503	2.5
Medium	YAHFPINVV	11	1	1	P32969		0	7.74862e+07	0.01	0.04501	21.47	2.56841	2	1059.56	-0.61371	66.7636	0	C1203	85.19	C1203	7.5	C1203	0.01
Medium	KKEGGTVVY	5	1	1	P49419		0	1.33387e+06	0.01	0.04371	20.17	2.66655	2	980.541	-0.100023	21.4665	0	C1203	48.15	B1503	26.8	B1503	0.7
Medium	AALTFPVLF	11	1	1	Q05D32		0	8.76553e+06	0.01	0.04415	18.4	3.8268	2	978.566	-0.152098	103.004	0	C1203	77.78	B1503	26.2	B1503	0.7
Medium	SKHRAQVIY	3	1	1	P62851		0	788553	0.01	0.04715	16.91	7.19993	2	1101.62	-0.665491	21.6501	0	C1203	40.74	B1503	15.9	B1503	0.4
Medium	EVAAGGWHSV	4	1	1	A6NED2		0	1.52894e+07	0.01	0.04857	16.75	6.44931	2	1012.48	0.0666772	44.1578	0	C1203	31.43	A6802	17.2	A6802	0.15
Medium	DLFQVIYNV	3	1	1	P98082		0	991775	0.01	0.04884	16.55	8.84131	2	1110.58	-0.408948	104.023	0	C1203	44.44	A6802	87.1	A6802	0.7
Medium	IQWENNGQVF	1	1	1	P28300		0	3.94477e+06	0.01	0.04599	16.41	8.85555	2	1234.59	0.271765	72.722	0	C1203	40	B1503	4.7	B1503	0.05
Medium	EVSLPSVEV	8	1	1	Q8IVF2		0	1.09304e+07	0.01	0.04884	16.21	8.93664	2	958.509	-0.125714	72.3987	0	C1203	48.15	A6802	7.5	A6802	0.05
Medium	DTITPQQVFV	3	1	1	Q9NZW5		0	9.25945e+06	0.01	0.04884	13.86	20.8967	2	1147.6	-0.317775	77.769	0	C1203	45.71	A6802	21.5	A6802	0.2
Medium	RKSGVGNVF	4	2	2	Q13310;Q5JQF8		0	3.68086e+06	0.01	0.04356	13.7	11.0783	2	963.537	-0.375255	26.9313	0	C1203	40.74	B1503	6.8	B1503	0.12
Medium	HTMDPQLRL	4	1	1	P49327		0	19751302	0.01	0.04884	13.12	13.8239	2	1110.57	-0.819846	42.4477	0	C1203	74.07	A6802	87.4	C1203	0.5
Medium	ETHFTGNEV	4	1	1	Q9BX74		0	3.19885e+08	0.01	0.04227	12.35	12.198	2	1033.46	-1.18855	32.0104	0	C1203	70.37	A6802	11.7	A6802	0.1
Medium	IASPVIAAV	3	1	1	Q6ZMZ0		0	1.54211e+07	0.011	0.04884	35.88	0.0336469	2	840.519	-0.23308	64.6387	0	C1203	88.89	C1203	11.1	C1203	0.03
Medium	TVSDVLNSV	1	1	1	Q14746		0	1.0584e+07	0.011	0.04884	35.28	0.111063	2	933.488	-0.887705	66.528	0	C1203	44.44	A6802	4.1	A6802	0.01
Medium	AAFPIAVVA	1	1	1	Q53GS7		0	3.96428e+06	0.011	0.04884	34.19	0.200098	2	858.509	0.128345	78.0856	0	C1203	59.26	C1203	150.3	C1203	0.7
Medium	EVYPGTYSV	14	1	1	Q9NQ31		0	7.14551e+07	0.011	0.04884	33.86	0.11173	2	1014.48	-0.822054	58.8587	0	C1203	48.15	A6802	2.4	A6802	0.01
Medium	RQGTPLIAF	11	1	1	Q2NL82		0	6.33494e+07	0.011	0.04884	31.49	0.211632	2	1002.57	-0.338923	58.6576	0	C1203	33.33	B1503	3.8	B1503	0.03
Medium	EVANLLQGV	7	1	1	Q5VIR6		0	8.32616e+06	0.011	0.04884	28.85	0.407109	2	942.525	-0.606199	73.063	0	C1203	40.74	A6802	3.5	A6802	0.01
Medium	GQAHPSASY	1	1	1	Q15652		0	955506	0.011	0.04884	28.74	0.31283	2	917.411	-0.411048	22.6489	0	C1203	40.74	B1503	3.4	B1503	0.02
Medium	EIAAVIETV	17	1	1	Q7Z4G1		0	1.3744e+08	0.011	0.04884	27.77	0.527396	2	944.53	-0.244159	70.2277	0	C1203	48.15	A6802	4	A6802	0.01
Medium	RSVDIINML	6	1	1	Q709C8		0	1.27354e+07	0.011	0.04884	26.21	0.865303	2	1060.58	-0.617466	70.6073	0	C1203	74.07	C1203	58.2	C1203	0.3
Medium	ETNAVHVNV	2	1	1	Q2LD37		0	4.26781e+06	0.011	0.04884	23.94	1.56937	2	982.495	-0.108411	34.9127	0	C1203	70.37	A6802	3.2	A6802	0.01
Medium	ETYPDAVKI	4	1	1	Q8WV22		0	2.64922e+07	0.011	0.04884	23.23	2.34316	2	1035.53	-1.46206	50.1075	0	C1203	74.07	A6802	20.9	A6802	0.2
Medium	EAGPPQPMV	12	1	1	Q96AQ6		0	1.80066e+07	0.011	0.04884	22.43	2.38878	2	925.445	-0.230833	49.7817	0	C1203	81.48	A6802	438.7	A6802	2
Medium	IGVEHVVVY	6	1	1	P49411		0	1.18708e+08	0.011	0.04884	21.3	3.0175	2	1014.56	-1.45869	53.32	0	C1203	51.85	B1503	20	C1203	0.4
Medium	HTVGIIVKT	7	1	1	Q96QT6		0	8.37496e+06	0.011	0.04884	20.96	0.735139	2	967.593	-0.355576	32.2947	0	C1203	40.74	A6802	29.3	A6802	0.3
Medium	HKVISGTTL	8	1	1	Q9NUL3		0	7.16314e+06	0.011	0.04884	20.89	1.84245	2	955.557	-0.474149	26.7996	0	C1203	40.74	B1503	36.3	B1503	0.9
Medium	SKLGPGEKY	7	2	2	P53805;Q9UKA8		0	4.97984e+06	0.011	0.04884	17.15	7.25906	2	978.524	-1.94592	23.492	0	C1203	40.74	B1503	143.7	B1503	2.5
Medium	GKAFSRSSY	1	3	3	Q8N9K5;Q7L945;P17097		0	1.28435e+06	0.011	0.04884	16.7	7.76187	2	1002.5	-1.33796	22.6392	0	C1203	40.74	B1503	14.9	B1503	0.4
Medium	EIAQVVEKV	9	1	1	Q9BYK8		0	239881031	0.011	0.04884	13.8	12.3393	2	1014.58	-0.347039	46.4792	0	C1203	44.44	A6802	12.1	A6802	0.1
Medium	SQLVAGVAF	1	1	1	Q99832		0	4.44958e+06	0.012	0.04884	44.13	0.0175082	2	891.493	-0.108283	72.4364	0	C1203	33.33	B1503	3.3	B1503	0.02
Medium	GAFGKPSSL	9	1	1	Q8IVT2		0	6.33333e+06	0.012	0.04884	41.39	0.0342359	2	863.462	-0.619384	36.7309	0	C1203	85.19	C1203	61.9	C1203	0.3
Medium	EVSNTFVRL	5	1	1	Q9BUI4		0	5.36906e+07	0.012	0.04884	31.7	0.254714	2	1064.57	0.00246754	55.1236	0	C1203	44.44	A6802	29.1	A6802	0.3
Medium	ETSHVTMVVA	3	1	1	Q7L5Y9		0	1.44974e+07	0.012	0.04884	27.5	0.714068	2	1073.53	-0.598994	40.0754	0	C1203	25.71	A6802	28.5	A6802	0.3
Medium	DAFPWTISL	1	1	1	Q7Z7G8		0	1.29894e+06	0.012	0.04884	25.28	1.43468	2	1049.53	-0.883088	105.732	0	C1203	88.89	A6802	56.6	C1203	0.3
Medium	EVLGPLAQV	1	1	1	Q8N196		0	3.47414e+06	0.012	0.04884	24.09	0.752588	2	925.535	-0.236065	74.5586	0	C1203	40.74	A6802	5.6	A6802	0.03
Medium	PQCPSGRVY	4	1	1	Q16186		0	1.39968e+07	0.012	0.04884	23.17	1.36271	2	1006.48	0.560015	36.338	0	C1203	51.85	B1503	120	B1503	2.5
Medium	FVYENPISL	7	1	1	Q6NTF9		0	1.93773e+07	0.012	0.04884	21.97	2.51591	2	1081.56	0.313432	80.726	0	C1203	55.56	C1203	3.5	C1203	0.01
Medium	QLPNFAFSV	2	1	1	Q9BQ70		0	5.09786e+06	0.012	0.04884	21.88	2.92858	2	1022.53	0.203434	86.8533	0	C1203	37.04	A6802	83.1	A6802	0.7
Medium	ETANFYQKA	4	1	1	Q5VW32		0	1.14632e+07	0.012	0.04884	21.76	2.20246	2	1071.51	-0.602893	33.4115	0	C1203	33.33	A6802	11.7	A6802	0.1
Medium	RKLSVILIL	3	1	1	Q13433		0	8.65132e+07	0.012	0.04884	21.4	0.0362218	2	1054.73	-0.524153	63.1189	0	C1203	48.15	B1503	28.6	B1503	0.7
Medium	ETSPHTFQL	4	1	1	Q69YN4		0	58269433	0.012	0.04884	20.23	3.69172	2	1059.51	-1.53143	47.3085	0	C1203	77.78	A6802	9	A6802	0.06
Medium	HQFLSEQF	6	1	1	Q8TDB6		0	1.43585e+07	0.012	0.04884	18.98	4.48476	2	1035.49	-0.494549	54.8629	0	C1203	36.67	B1503	25.2	B1503	0.7
Medium	DTFPTAMHI	6	1	1	P07954		0	2.42399e+07	0.012	0.04884	18.66	5.27015	2	1032.48	-0.197823	64.6	0	C1203	70.37	A6802	17.5	A6802	0.17
Medium	AKYPEIKSL	1	1	1	O15121		0	0	0.012	0.04884	17.54	4.08426	2	1048.6	-2.28432	39.4669	0	C1203	59.26	B1503	83	B1503	1.7
Medium	EVAETSMHNL	2	1	1	Q99961		0	5.17763e+06	0.012	0.04884	16.59	5.2726	2	1130.51	-0.220611	41.8922	0	C1203	28.57	A6802	22.3	A6802	0.25
Medium	ETAKLIEKL	10	1	1	P13639		0	554031360	0.012	0.04884	15.98	4.22305	2	1044.63	-1.69426	39.6444	0	C1203	74.07	A6802	26.7	A6802	0.25
Medium	KQQNPRLVY	2	1	1	O00764		0	7.45496e+06	0.012	0.04884	15.66	8.41145	2	1145.64	-0.404889	28.9673	0	C1203	44.44	B1503	3.3	B1503	0.02
Medium	ETARLTSFI	2	1	1	P78371		0	7.52168e+06	0.012	0.04884	12.85	15.7196	2	1037.56	-0.904229	60.009	0	C1203	62.96	A6802	3	A6802	0.01
Medium	AAYGNRQNL	1	1	1	Q8NB46		0	2.52141e+06	0.012	0.04884	12.1	26.5506	2	1006.51	-0.226641	26.8317	0	C1203	85.19	C1203	80.9	C1203	0.4
Medium	YKKELEKTY	1	1	1	P02545		0	1.59789e+06	0.012	0.04884	11.95	25.1157	3	1201.65	0.401452	23.4999	0	C1203	51.85	B1503	32.8	B1503	0.8
Medium	SKWNTRESY	2	1	1	Q99848		0	1.93875e+06	0.012	0.04884	11.35	21.8968	2	1170.55	-0.592126	27.2925	0	C1203	37.04	B1503	20.1	B1503	0.5
Medium	GKTTQVTQF	4	1	1	Q9H2U1		0	3.45492e+06	0.013	0.04884	30.38	0.283204	2	1009.53	-2.56276	31.4891	0	C1203	33.33	B1503	81.1	B1503	1.6
Medium	AASPIITLV	2	1	1	Q8TEM1		0	1.36006e+07	0.013	0.05074	30.04	0.161803	2	884.545	0.232232	77.7724	0	C1203	92.59	C1203	35.1	C1203	0.15
Medium	QTHSVFVNV	6	1	1	Q9Y3A5		0	4.15623e+07	0.013	0.04926	28.75	0.585216	2	1030.53	0.0121391	45.4682	0	C1203	74.07	A6802	6.2	A6802	0.03
Medium	EAFGQSFSI	1	1	1	Q96G01		0	5.13033e+06	0.013	0.05048	28.15	0.523019	2	985.462	-0.381038	75.1283	0	C1203	74.07	A6802	9	A6802	0.06
Medium	ETFSSVSQL	5	1	1	O94768		0	2.45335e+07	0.013	0.05151	26.9	0.64672	2	997.484	0.111227	61.2648	0	C1203	77.78	A6802	15.1	A6802	0.15
Medium	EVSKAIINI	10	1	1	Q9NXP7		0	6.06931e+07	0.013	0.04884	26.67	0.586956	2	986.588	-0.309295	53.5336	0	C1203	40.74	A6802	19.1	A6802	0.17
Medium	TTFGSRVNV	5	1	1	Q9P265		0	2.65555e+07	0.013	0.04884	25.48	1.03969	2	980.515	-0.71892	39.4931	0	C1203	77.78	A6802	5.6	A6802	0.03
Medium	KKVSKAAIL	5	1	1	O00767		0	1.09345e+06	0.013	0.05269	25.05	0.0683048	2	957.645	-0.154503	20.4618	0	C1203	40.74	B1503	65.6	B1503	1.4
Medium	ETAENILGV	3	1	1	Q8IWF2		0	2.46345e+07	0.013	0.05066	24.96	1.5104	2	945.489	0.145851	68.1691	0	C1203	81.48	A6802	2.8	A6802	0.01
Medium	GKAFNGKAY	2	1	1	Q3ZCT1		0	574979	0.013	0.05234	23.63	1.41455	2	955.499	-0.458602	21.7441	0	C1203	44.44	B1503	22.3	B1503	0.6
Medium	GKTDPGTVF	1	1	1	Q9NYK5		0	4.12984e+06	0.013	0.05166	23.43	2.5364	2	921.467	-0.963531	36.9851	0	C1203	37.04	B1503	25.1	B1503	0.7
Medium	THRSGQGAF	4	1	1	P36578		0	785257	0.013	0.04909	22.97	2.13446	2	960.464	-0.311586	18.2174	0	C1203	33.33	B1503	73.8	B1503	1.5
Medium	HVSHILQKA	2	1	1	P07093		0	478497	0.013	0.05313	22.9	1.08496	2	1032.59	-0.73358	20.8065	0	C1203	3.7	A6802	204.8	A6802	1.3
Medium	KIYEPPRYM	3	1	1	Q9H2P9		0	1.28947e+07	0.013	0.05268	22.9	1.76168	2	1196.61	0.243762	41.8577	0	C1203	44.44	C1203	53.6	C1203	0.25
Medium	EVAKVIVSM	5	1	1	Q99996		0	3.95868e+07	0.013	0.0503	22.4	1.84975	2	975.554	-0.398361	51.2298	0	C1203	40.74	A6802	21.5	A6802	0.2
Medium	EVFQGVEKL	13	1	1	Q9Y330		0	4.94811e+07	0.013	0.04886	21.68	2.91684	2	1048.57	-1.24328	53.9262	0	C1203	44.44	A6802	78	A6802	0.7
Medium	ETDPGMVHL	6	1	1	Q9NZN8		0	2.26457e+07	0.013	0.05125	20.69	2.11825	2	998.46	-1.14349	49.3407	0	C1203	77.78	A6802	175.2	A6802	1.2
Medium	THLKPGTLY	4	1	1	Q53EP0		0	2.79662e+07	0.013	0.04973	20.11	4.17539	2	1029.57	-0.810324	35.3352	0	C1203	37.04	B1503	35.2	B1503	0.9
Medium	DVGPTTMHV	2	1	1	Q99715		0	9.11459e+06	0.013	0.04886	18.91	3.73826	2	956.45	-0.416528	47.9003	0	C1203	44.44	A6802	52.5	A6802	0.5
Medium	EVSNLYNNI	1	1	1	O94874		0	1.24651e+07	0.013	0.04884	18.82	6.27625	2	1065.52	-1.23725	60.6141	0	C1203	33.33	A6802	14.1	A6802	0.12
Medium	EAMRIGAEV	5	2	2	P06733;P13929		0	9.98264e+06	0.013	0.05287	17.59	7.73362	2	975.493	-0.329091	42.7627	0	C1203	77.78	A6802	7	A6802	0.04
Medium	YQILQGIVF	5	1	1	P06493		0	2.71978e+06	0.013	0.05227	15.24	7.05875	2	1080.61	-0.930602	95.2266	0	C1203	40.74	B1503	3.3	B1503	0.02
Medium	TVmLVKESL	1	1	1	Q9NQC3	M3(Oxidation)	0	5.83339e+07	0.013	0.04901	14.56	7.15113	2	1035.57	-0.499751	57.4307	0	C1203	37.04	A6802	210.1	A6802	1.3
Medium	KKIRTSPTF	1	1	1	P62750		0	1.8295e+06	0.013	0.04963	13.22	6.70815	2	1077.64	-0.588842	22.8394	0	C1203	33.33	B1503	4.7	B1503	0.05
Medium	IAFEFPVLV	6	1	1	Q8TDN4		0	4.41825e+06	0.013	0.05024	13.21	12.2367	2	1034.59	0.647343	104.457	0	C1203	88.89	C1203	10.1	C1203	0.03
Medium	WKHGSGTQY	1	1	1	Q96B23		0	750565	0.013	0.05293	10.89	29.9852	2	1063.5	-0.171485	22.06	0	C1203	40.74	B1503	12.7	B1503	0.3
Medium	GQHSHVVRY	1	1	1	P30291		0	426398	0.013	0.0498	10.69	28.839	2	1082.55	-0.134475	18.9045	0	C1203	48.15	B1503	4.3	B1503	0.04
Medium	WTTDIYGRL	2	1	1	Q15048		0	1.01436e+07	0.014	0.06252	33.43	0.181917	2	1124.57	-0.965706	51.984	0	C1203	70.37	A6802	32.7	A6802	0.3
Medium	QQIRSQKGY	1	1	1	O15050		0	59825605	0.014	0.06146	32.86	0.164935	2	1107.59	3.03213	27.9078	0	C1203	40.74	B1503	19.9	B1503	0.5
Medium	SSFPRFYFV	3	1	1	Q14204		0	2.69559e+07	0.014	0.06212	31.08	0.378841	2	1149.57	0.221252	76.9221	0	C1203	77.78	A6802	7.8	A6802	0.05
Medium	EVANKFAKA	2	1	1	Q14978		0	3.45381e+06	0.014	0.06238	29.98	0.370301	2	977.541	-0.271058	22.3993	0	C1203	3.7	A6802	23.1	A6802	0.25
Medium	ETSSWVNLV	8	1	1	Q7Z7N9		0	10672517	0.014	0.0568	29.94	0.574482	2	1034.52	-0.269743	80.5389	0	C1203	77.78	A6802	4.6	A6802	0.01
Medium	EVTNVWINV	9	1	1	Q86TI2		0	4.11005e+07	0.014	0.05457	29.86	0.534196	2	1073.56	-0.305378	80.205	0	C1203	40.74	A6802	9.3	A6802	0.07
Medium	GQNAQTMAY	3	1	1	O75534		0	1.36109e+07	0.014	0.05777	28.79	0.228914	2	983.425	-0.542141	37.1785	0	C1203	37.04	B1503	4	B1503	0.03
Medium	LAYNEIITI	1	1	1	Q13085		0	3.9929e+06	0.014	0.0571	28.21	0.366043	2	1049.59	-0.0735688	85.8153	0	C1203	81.48	C1203	11.7	C1203	0.03
Medium	ESSKVVKKV	4	1	1	Q2NL82		0	5.77639e+06	0.014	0.0543	27.63	0.176898	2	1003.61	-0.425386	16.451	0	C1203	77.78	A6802	219.2	A6802	1.3
Medium	HKSPDGRTY	3	1	1	O75400		0	660132	0.014	0.05441	26.75	0.845184	2	1060.52	-0.388621	16.1581	0	C1203	55.56	B1503	23.2	B1503	0.6
Medium	LTPSHIKAY	1	1	1	P50613		0	1.99081e+06	0.014	0.05922	25.2	1.30235	2	1029.57	0.138189	29.4699	0	C1203	77.78	C1203	101.6	C1203	0.5
Medium	GKKGPQSLF	9	1	1	P46087		0	1.40784e+07	0.014	0.05481	24.07	1.20128	2	961.546	-0.417165	30.5941	0	C1203	33.33	B1503	99.4	B1503	1.9
Medium	YTFPQILGV	3	1	1	Q8N8U2		0	1.03638e+07	0.014	0.05877	23.64	1.559	2	1037.57	-0.651267	93.6649	0	C1203	88.89	A6802	4.8	C1203	0.01
Medium	ETSPHVIQA	11	1	1	O75533		0	5.06416e+08	0.014	0.06306	23.18	1.36222	2	981.499	-1.15473	34.5687	0	C1203	48.15	A6802	13.8	A6802	0.12
Medium	STIAILNSV	2	1	1	P42695		0	1.01637e+07	0.014	0.05867	22.74	1.47048	2	917.53	-0.134458	73.3534	0	C1203	66.67	A6802	2.9	A6802	0.01
Medium	ESINHVVVF	6	1	1	Q53FT3		0	4.62537e+07	0.014	0.05748	21.67	2.94603	2	1043.55	-0.713113	57.9733	0	C1203	70.37	B1503	48.9	C1203	0.8
Medium	YSIPLVQLF	1	1	1	O94822		0	1.50001e+06	0.014	0.05788	18.98	2.93861	2	1079.61	-0.582303	103.077	0	C1203	74.07	C1203	10.8	C1203	0.03
Medium	EVAAKAERV	2	1	1	Q9Y383		0	1.62624e+06	0.014	0.05371	18.4	6.51749	2	972.547	-0.231964	19.6864	0	C1203	40.74	A6802	22.7	A6802	0.25
Medium	EVLDKRYNV	15	1	1	Q13523		0	2.03691e+07	0.014	0.05869	18.26	5.53528	2	1135.61	-0.10573	35.465	0	C1203	40.74	A6802	24.1	A6802	0.25
Medium	GQDKPHETY	1	1	1	Q12789		0	674677	0.014	0.06262	16.69	4.79472	2	1074.48	-0.39513	19.2694	0	C1203	40.74	B1503	85.5	B1503	1.7
Medium	SAFGFPVIL	2	1	1	O15243		0	1.64545e+07	0.014	0.06209	16.5	8.09522	2	950.535	-0.103981	100.815	0	C1203	88.89	C1203	13.1	C1203	0.04
Medium	ETFGFRGEAL	6	2	2	A4D2B8;P54278		0	1.58176e+07	0.014	0.05638	12.56	20.352	2	1126.55	-0.567819	59.5353	0	C1203	60	A6802	15.6	A6802	0.15
Medium	QSAEIWEKL	2	1	1	Q7L4I2		0	1.2587e+07	0.015	0.07538	35.89	0.139108	2	1103.57	-0.583501	62.0662	0	C1203	74.07	A6802	204	A6802	1.3
Medium	EISGIVEVV	2	1	1	P35244		0	7.62528e+07	0.015	0.07797	35.34	0.0922862	2	944.53	-0.244159	73.7424	0	C1203	51.85	A6802	11.4	A6802	0.09
Medium	YAAGFIFTT	3	2	2	P22557;P13196		0	1.2338e+07	0.015	0.06752	33.83	0.197519	2	990.493	-0.0522054	81.9975	0	C1203	55.56	A6802	29.1	A6802	0.3
Medium	NAYTGIVLL	2	1	1	Q969H6		0	2.02616e+07	0.015	0.07401	32.17	0.173709	2	963.551	-0.358628	82.609	0	C1203	85.19	C1203	38.2	C1203	0.17
Medium	SIHVGQAGV	3	5	5	Q71U36;P68363;Q9BQE3;Q13748;Q6PEY2		0	1.13773e+07	0.015	0.06911	31.36	0.263247	2	867.468	-0.166061	34.2916	0	C1203	37.04	A6802	335	A6802	1.7
Medium	LILPGFIDF	2	1	1	P20839		0	2.10383e+06	0.015	0.07274	26.31	0.580149	2	1034.59	-0.886512	107.214	0	C1203	40.74	B1503	50.8	B1503	1.2
Medium	TKQPIPAAY	3	1	1	Q6P1J9		0	4.344e+06	0.015	0.06484	26.2	1.3124	2	988.545	-0.792624	37.1834	0	C1203	48.15	B1503	21.6	B1503	0.6
Medium	IKDNVVIVY	6	1	1	Q9Y2T2		0	2.23314e+07	0.015	0.07584	25.56	0.538847	2	1062.62	-0.439684	54.3245	0	C1203	48.15	B1503	44.4	B1503	1.1
Medium	KAVGHPFVI	7	1	1	O14980		0	4.51421e+07	0.015	0.06398	24.52	0.487216	2	967.572	-0.795252	37.6826	0	C1203	77.78	C1203	67.5	C1203	0.3
Medium	TADVIAKV	1	1	1	O43617		0	6.67004e+06	0.015	0.06913	24.3	1.78913	2	816.483	-0.0744549	45.1081	0	C1203	76.67	A6802	355.8	A6802	1.8
Medium	TVTTVILEV	1	1	1	Q9UKF6		0	1.71375e+08	0.015	0.07219	23.72	0.58279	2	974.576	-0.679091	77.0491	0	C1203	48.15	A6802	23.3	A6802	0.25
Medium	ATSSVFQEV	8	1	1	Q9BTE0		0	1.99027e+07	0.015	0.06899	22.78	1.7881	2	967.473	-0.389072	58.3543	0	C1203	81.48	A6802	24	A6802	0.25
Medium	RKFQAHKPA	1	1	1	Q9UNZ5		0	1.25377e+06	0.015	0.06945	20.95	1.53232	2	1082.62	-0.740815	17.1294	0	C1203	7.41	B1503	183.1	B1503	3
Medium	LTTDISLIFA	5	1	1	Q6PKG0		0	1.22638e+07	0.015	0.06553	20.71	1.72723	2	1093.61	-0.0567839	96.2881	0	C1203	22.86	A6802	73.9	A6802	0.6
Medium	HAIKSVKIY	1	1	1	P53618		0	3.91375e+06	0.015	0.06773	19.25	2.2332	2	1058.64	-0.511853	30.2704	0	C1203	81.48	B1503	24.9	C1203	0.4
Medium	SKRTGVQTF	7	1	1	P53621		0	1.20783e+07	0.015	0.06752	17.66	5.56265	2	1023.56	-0.414675	22.4027	0	C1203	37.04	B1503	9	B1503	0.17
Medium	NQKEAVAY	1	1	1	Q03518		0	822792	0.015	0.0716	17.51	8.17724	2	922.463	0.0400274	24.9881	0	C1203	33.33	B1503	278.4	B1503	3.5
Medium	KKREAEEVY	3	1	1	Q9Y383		0	887252	0.015	0.06816	17.17	6.70383	2	1151.6	-0.569034	18.6956	0	C1203	44.44	B1503	19	B1503	0.5
Medium	RKQIFILLF	1	1	1	P55060		0	5.67761e+06	0.015	0.0655	16.23	0.497905	2	1177.75	0.12213	77.4137	0	C1203	37.04	B1503	21.3	B1503	0.6
Medium	ETTKLGDFV	6	1	1	Q96AY3		0	1.22415e+07	0.015	0.0688	15.51	10.3267	2	1009.52	-0.336146	53.0569	0	C1203	66.67	A6802	15.1	A6802	0.15
Medium	FQNESGSKY	3	1	1	O94806		0	1.30542e+06	0.015	0.0759	15.06	6.77267	2	1059.47	-0.366992	25.1417	0	C1203	44.44	B1503	4.6	B1503	0.04
Medium	RKDDPRLSF	4	1	1	P78527		0	2.15195e+07	0.015	0.06608	13.72	16.2417	2	1133.61	-1.07024	30.699	0	C1203	37.04	B1503	76.8	B1503	1.6
Medium	EAVDLITRL	2	1	1	Q9P0M9		0	7.42766e+06	0.015	0.0777	10.44	28.2662	2	1029.59	-0.732379	66.4368	0	C1203	81.48	A6802	91.5	A6802	0.7
Medium	QQALHTVQY	1	1	1	Q5SRE5		0	5.55782e+06	0.016	0.08142	29.92	0.410951	2	1087.55	-0.181376	39.3134	0	C1203	44.44	B1503	4.4	B1503	0.04
Medium	MATPLLMQA	6	1	1	P04233		0	1.11806e+07	0.016	0.07859	27.01	0.942186	2	975.5	-0.0836811	71.7429	0	C1203	44.44	A6802	113.4	C1203	0.6
Medium	AAIGLVIYYL	5	1	1	P51571		0	2.73249e+06	0.016	0.08351	26.82	0.238333	2	1095.65	0.271895	102.91	0	C1203	62.86	A6802	352.4	A6802	1.8
Medium	GKGSFGEVF	6	2	2	Q9P289;Q9Y6E0		0	1.84966e+07	0.016	0.08567	25.87	0.991933	2	927.457	-0.298226	49.1722	0	C1203	37.04	B1503	52	B1503	1.2
Medium	ESANLDFML	2	1	1	O14545		0	6.53658e+06	0.016	0.08018	24.69	1.13316	2	1039.48	-0.393932	85.3774	0	C1203	70.37	A6802	26.2	A6802	0.25
Medium	MKLLLALAGL	1	1	1	P05164		0	3.0417e+07	0.016	0.08665	23.91	0.325155	2	1042.67	-3.40686	83.3894	0	C1203	28.57	B1503	135.9	B1503	2.5
Medium	ETFVGDYTL	1	1	1	P19174		0	1.31906e+07	0.016	0.07984	20.78	2.16505	2	1044.49	-0.234107	76.9973	0	C1203	74.07	A6802	16.4	A6802	0.15
Medium	YSADGHSIL	3	1	1	Q15269		0	1.1007e+07	0.016	0.08637	17.66	7.9519	2	962.458	-0.31711	45.2076	0	C1203	77.78	C1203	13.9	C1203	0.04
Medium	SVATLAEIYV	1	1	1	P36956		0	8.64725e+06	0.016	0.08183	15.43	6.88835	2	1065.58	-0.803872	84.6934	0	C1203	22.86	A6802	23.6	A6802	0.25
Medium	RKAPQHTAV	1	1	1	O43242		0	1.50898e+06	0.016	0.08577	13.23	10.1033	2	1007.57	-0.384112	16.7433	0	C1203	48.15	B1503	104	B1503	1.9
Medium	EVFFKEIFL	1	2	2	Q9Y6D6;Q9Y6D5		0	5.62969e+06	0.016	0.08522	12.4	18.909	2	1171.64	0.301302	86.7111	0	C1203	44.44	A6802	21.8	A6802	0.2
Medium	SALEHVVEF	2	1	1	O75581		0	0	0.016	0.08367	10.28	43.4748	2	1030.52	0.71271	59.7079	0	C1203	81.48	B1503	17	C1203	0.15
Medium	mALSAVVSL	3	1	1	Q8NBI5	M1(Oxidation)	0	1.0159e+07	0.017	0.09474	45.19	0.0139768	2	906.494	-3.33093	67.4075	0	C1203	85.19	C1203	20	C1203	0.08
Medium	DVTAIIFVV	7	2	2	Q5JWF2;P63092		0	1.17479e+08	0.017	0.09462	29.32	0.226766	2	976.571	-0.326427	107.138	0	C1203	44.44	A6802	14.6	A6802	0.12
Medium	AQFKGTQSL	1	1	1	Q9UK61		0	2.05255e+07	0.017	0.09476	27.16	0.778275	2	979.52	-0.272505	33.41	0	C1203	44.44	B1503	3.7	B1503	0.03
Medium	VAYSHPTTV	1	1	1	Q96KR1		0	2.65687e+06	0.017	0.08927	21.85	3.68464	2	974.494	-0.31632	32.1326	0	C1203	92.59	C1203	6.3	C1203	0.01
Medium	ETARIAQLV	1	1	1	Q8NHU6		0	1.0495e+07	0.017	0.08792	21.37	2.53268	2	1000.58	-0.448442	49.3242	0	C1203	70.37	A6802	3.7	A6802	0.01
Medium	ETIRNIPHL	2	1	1	Q9NVX0		0	1.11354e+07	0.017	0.09404	21.25	1.75963	2	1092.62	-0.378098	47.361	0	C1203	70.37	A6802	35	A6802	0.4
Medium	KKVERQAEL	1	2	2	P0CB38;Q13310		0	435648	0.017	0.09448	20.72	2.33411	2	1100.64	-0.139789	18.5621	0	C1203	44.44	B1503	279	B1503	3.5
Medium	GQRPTQPVY	12	1	1	Q9H0W8		0	1.65505e+07	0.017	0.09352	20.08	4.1847	2	1045.54	-0.37248	32.6362	0	C1203	48.15	B1503	4.7	B1503	0.05
Medium	ETAPRTIFQRV	2	1	1	Q9UBB4		0	1.55513e+08	0.017	0.09457	16.15	7.03717	3	1317.73	0.231082	44.5017	0		0	A6802	29.8	A6802	0.3
Medium	KQRPGQQVA	2	1	1	O75534		0	575762	0.017	0.08765	15.8	5.23423	2	1011.57	-0.489349	16.9831	0	C1203	11.11	B1503	89.4	B1503	1.7
Medium	KKRENDKVKY	1	1	1	Q9UKG1		0	273016	0.017	0.09472	14.54	6.53199	3	1307.74	0.151368	16.2959	0	C1203	28.57	B1503	270.9	B1503	3.5
Medium	YKEKTGQEY	1	1	1	P07814		0	563502	0.017	0.09012	10.9	28.5466	2	1145.55	-0.374233	19.7015	0	C1203	44.44	B1503	140	B1503	2.5
Medium	LQAVELQGL	1	1	1	Q96HA7		0	2.97517e+07	0.018	0.0977	35.17	0.0758093	2	970.556	-0.577321	79.1226	0	C1203	40.74	B1503	91.7	B1503	1.8
Medium	QTVGVIVRL	2	1	1	O00267		0	1.67198e+07	0.018	0.09874	34.85	0.041785	2	984.62	-0.235309	60.5194	0	C1203	77.78	A6802	21.2	A6802	0.2
Medium	GKRPGGSTF	6	1	1	O15399		0	6.18498e+06	0.018	0.09708	29.71	0.409876	2	906.479	-0.209376	19.6078	0	C1203	40.74	B1503	10.1	B1503	0.2
Medium	ESASFTVTV	2	1	1	O75147		0	4.62528e+07	0.018	0.1002	28.67	0.334485	2	940.462	-0.232443	65.4866	0	C1203	81.48	A6802	2.6	A6802	0.01
Medium	VRAFLAAAL	4	1	1	Q8TAC2		0	1.05582e+08	0.018	0.09976	24.94	0.324955	2	931.572	-0.116015	65.5265	0	C1203	44.44	B1503	59.1	C1203	1.1
Medium	STAPPAHGV	2	1	1	P15941		0	3.00697e+07	0.018	0.09978	22.13	3.02379	2	836.426	0.00325735	22.1667	0	C1203	77.78	A6802	3.7	A6802	0.01
Medium	ESVERLTGV	1	1	1	O75955		0	3.28245e+06	0.018	0.09968	16.46	10.0116	2	989.526	-0.389914	43.284	0	C1203	70.37	A6802	5.9	A6802	0.03
Medium	RQLYLSERY	1	1	1	Q5T953		0	5.09326e+06	0.018	0.1001	16.45	7.13703	2	1227.65	0.0387634	41.4731	0	C1203	37.04	B1503	6.5	B1503	0.1
Medium	STYPAPFYV	1	1	1	P15923		0	3.03318e+06	0.018	0.09718	12.56	17.8118	2	1044.5	0.0176238	76.7811	0	C1203	81.48	A6802	4.5	A6802	0.01
Medium	HACGVIATI	1	1	1	O95807		0	1.32289e+07	0.019	0.1075	38.05	0.0404143	2	884.466	0.111572	46.9983	0	C1203	77.78	A6802	88	C1203	0.6
Medium	SATETINKL	8	1	1	P15924		0	1.07698e+07	0.019	0.1033	31.64	0.217711	2	976.531	-0.248858	34.8779	0	C1203	81.48	C1203	193.6	C1203	0.8
Medium	GGYGGSRDY	3	1	1	Q14011		0	1.23357e+06	0.019	0.1056	30.85	0.110633	2	931.39	-0.297386	25.2037	0	C1203	48.15	B1503	82.9	B1503	1.7
Medium	SQVPTQMSF	1	1	1	Q8TEL6		0	1.1607e+07	0.019	0.104	25.47	1.05003	2	1024.48	0.00286915	61.5099	0	C1203	37.04	B1503	2.5	B1503	0.01
Medium	GKMDPVAY	3	1	1	P47897		0	5.87069e+06	0.019	0.1072	25.27	1.4212	2	880.423	-0.316931	37.056	0	C1203	26.67	B1503	101	B1503	1.9
Medium	RKIANSDKY	1	1	1	O75164		0	508225	0.019	0.1072	23.01	1.67887	2	1094.59	-3.28789	17.8082	0	C1203	37.04	B1503	33.4	B1503	0.8
Medium	KKAHLGTAL	3	1	1	P62266		0	1.62829e+06	0.019	0.1053	22.27	0.453884	2	938.578	-0.246977	20.3444	0	C1203	40.74	B1503	18.7	B1503	0.5
Medium	SQRAGLQF	8	2	2	Q71UI9;P0C0S5		0	8.86857e+06	0.019	0.102	20.65	3.30105	2	906.479	-0.265676	37.9263	0	C1203	26.67	B1503	25.5	B1503	0.7
Medium	SMLSELSII	2	1	1	Q3ZCN5		0	4.98382e+06	0.019	0.1039	20.53	1.99505	2	992.533	-0.122526	94.8161	0	C1203	33.33	B1503	135.5	B1503	2.5
Medium	TVADVVLWSV	4	1	1	Q13155		0	1.24442e+07	0.019	0.1016	19.79	4.75128	2	1088.6	0.214268	93.3845	0	C1203	31.43	A6802	5.2	A6802	0.02
Medium	STFEDVTQV	3	1	1	Q14247		0	1.77001e+07	0.019	0.1068	18.66	3.72015	2	1025.48	-1.36605	62.2099	0	C1203	77.78	A6802	14.1	A6802	0.12
Medium	VTIGVWHTV	1	1	1	Q8N2K0		0	5.79623e+06	0.019	0.1008	10.45	24.5543	2	1011.56	-0.411367	62.1206	0	C1203	77.78	A6802	9.4	A6802	0.07
Medium	YMVRmRLY	2	1	1	Q5THJ4	M5(Oxidation)	0	3.38903e+07	0.02	0.1123	29.26	0.508576	2	1147.57	-1.06848	44.8816	0	C1203	36.67	B1503	92.5	B1503	1.8
Medium	AAISEVLYV	3	1	1	Q4G0J3		0	1.12257e+07	0.02	0.1134	25.76	0.655422	2	964.535	-0.243327	76.7377	0	C1203	88.89	C1203	45.9	C1203	0.25
Medium	SQLPKLLVY	1	1	1	P11117		0	7.80279e+06	0.02	0.1119	21.07	1.15446	2	1060.64	-0.534898	66.1945	0	C1203	51.85	B1503	3.3	B1503	0.02
Medium	TTIAIPFGTALV	1	1	1	Q5GLZ8		0	1.20314e+07	0.02	0.1098	14.95	6.14508	2	1203.7	-0.10095	96.5279	0		0	A6802	14.4	A6802	0.12
Medium	GKYGEGAKQETF	2	1	1	P78383		0	2.53959e+06	0.02	0.1114	14.75	10.6201	3	1314.63	0.0693819	27.3399	0		0	B1503	283.9	B1503	3.5
Medium	SKKPTGLFY	1	1	1	Q13459		0	3.82086e+06	0.02	0.1121	14.5	10.2612	2	1040.58	-0.566421	38.7524	0	C1203	48.15	B1503	24.3	B1503	0.6
Medium	RMWKTLTFF	5	1	1	P12074		0	1.5164e+07	0.02	0.1086	10.05	43.1256	2	1229.65	0.0412417	69.4586	0	C1203	29.63	B1503	3.7	B1503	0.03
Medium	ELANLYHHV	3	1	1	Q8TD16		0	1.31708e+07	0.021	0.1215	42.86	0.0190505	2	1095.56	-0.257744	38.766	0	C1203	40.74	A6802	11.9	A6802	0.1
Medium	SAVGLTAYV	3	2	2	P49736;P33991		0	1.57689e+07	0.021	0.1182	29.82	0.332603	2	880.477	-0.0303347	67.7906	0	C1203	77.78	A6802	4.8	A6802	0.02
Medium	SVFTFVAEV	4	1	1	Q7Z429		0	8.67924e+06	0.021	0.1177	27.88	0.543533	2	998.519	-0.220023	89.4133	0	C1203	48.15	A6802	6.7	A6802	0.04
Medium	FASPMKSVV	1	1	1	Q29RF7		0	7.55566e+06	0.021	0.115	27.49	0.658678	2	965.512	-0.276195	48.4667	0	C1203	92.59	C1203	10.9	C1203	0.03
Medium	SASPIFTHV	2	1	1	Q9HCG8		0	1.33087e+07	0.021	0.1158	23.69	2.04204	2	958.499	0.0249107	48.249	0	C1203	85.19	A6802	14	A6802	0.12
Medium	HAVEWPVVM	6	1	1	Q13535		0	5.34e+07	0.021	0.1184	22.13	2.18242	2	1067.53	-0.316762	67.2847	0	C1203	81.48	C1203	13.7	C1203	0.04
Medium	TTVRVTNSNA	3	3	3	Q15155;Q5JPE7;P69849		0	2.4799e+06	0.021	0.1179	22.05	2.80119	2	1062.55	-0.317071	22.5725	0	C1203	20	A6802	85.9	A6802	0.7
Medium	ARAGVVLEM	4	1	1	Q9UKP3		0	1.21528e+07	0.021	0.12	19.83	3.60644	2	945.518	-0.277223	48.1125	0	C1203	51.85	B1503	49.4	C1203	1
Medium	HQYPGRGVY	1	1	1	Q9H3P7		0	2.27177e+06	0.021	0.1218	19.43	5.76795	2	1076.53	-0.862574	26.7016	0	C1203	51.85	B1503	2.1	B1503	0.01
Medium	SQRPAARAF	1	2	2	Q9BTY7;P0CB43		0	3.26396e+06	0.021	0.1175	15.99	11.4076	2	1003.54	-0.771535	22.8445	0	C1203	40.74	B1503	2.8	B1503	0.01
Medium	FTAKVNIEV	2	1	1	Q9P015		0	1.66522e+07	0.021	0.1174	15.73	8.60173	2	1020.57	-0.752939	57.647	0	C1203	81.48	A6802	3.6	A6802	0.01
Medium	MGALATYIF	1	1	1	P08247		0	4.22855e+06	0.021	0.1174	13.15	17.0889	2	986.502	-0.10021	90.6218	0	C1203	33.33	B1503	24.5	B1503	0.6
Medium	HTSPSSDSL	1	1	1	P78527		0	769450	0.022	0.1251	34.09	0.0897257	2	930.416	-0.298873	23.7695	0	C1203	77.78	A6802	126.8	A6802	0.9
Medium	SKFAAVGFH	1	2	2	Q8NBQ5;Q7Z5P4		0	5.50244e+06	0.022	0.1245	33.69	0.135067	2	963.505	-0.226397	44.2055	0	C1203	7.41	B1503	230.1	B1503	3.5
Medium	ITAKVATHL	4	1	1	Q92752		0	3.31158e+07	0.022	0.1263	29.59	0.12688	2	953.577	-0.462598	43.0394	0	C1203	70.37	A6802	150.2	C1203	0.8
Medium	FTLGNVVGMY	2	1	1	E0CX11		0	3.52028e+06	0.022	0.1255	23.82	1.48325	2	1100.54	-0.387371	87.9805	0	C1203	54.29	C1203	356.1	C1203	1.3
Medium	VSFPYVIAL	1	1	1	Q8WUH2		0	5.25319e+06	0.022	0.1263	18.9	2.7794	2	1008.58	-0.441148	100.631	0	C1203	88.89	C1203	11.9	C1203	0.03
Medium	mALPGPEAL	1	1	1	Q8N1W2	M1(Oxidation)	0	3.22628e+07	0.022	0.1245	18.62	4.54739	2	914.465	-0.454896	87.6359	0	C1203	85.19	C1203	41	C1203	0.2
Medium	SAADIPINI	1	1	1	P21333		0	1.91527e+07	0.022	0.1263	15.03	10.0088	2	913.499	-0.224893	73.1832	0	C1203	81.48	C1203	41.7	C1203	0.2
Medium	RQKELESNY	1	1	1	Q13438		0	967230	0.022	0.124	12.36	23.1202	2	1166.58	-0.677252	22.8656	0	C1203	40.74	B1503	6.4	B1503	0.09
Medium	SKPKEKLVY	1	1	1	Q9BTY2		0	1.24067e+06	0.022	0.1263	11.29	10.8667	2	1091.65	-0.371814	22.0706	0	C1203	44.44	B1503	290.1	B1503	3.5
Medium	ALRKSEIEY	3	1	1	P62888		0	7.22115e+06	0.022	0.1263	10.61	26.9247	2	1108.6	-0.186178	29.2504	0	C1203	48.15	B1503	60.5	B1503	1.3
Medium	LFQQLAPLY	1	1	1	Q3ZCQ8		0	1.67604e+07	0.023	0.1263	41.21	0.0261334	2	1092.61	-0.920381	61.8605	0	C1203	37.04	B1503	210.8	B1503	3
Medium	ETSSVVRKI	6	1	1	Q5SRE5		0	32077443	0.023	0.1263	27.71	0.357929	2	1018.59	-0.201729	25.0876	0	C1203	74.07	A6802	47.4	A6802	0.5
Medium	IQHPSNVL	5	1	1	P14866		0	1.28156e+07	0.023	0.1263	27.11	0.685448	2	907.499	-0.202813	34.6267	0	C1203	40	B1503	118.2	B1503	2.5
Medium	AAAELIKEV	1	1	1	Q13425		0	4.86136e+06	0.023	0.1263	24.64	1.08599	2	943.546	-0.372504	47.4801	0	C1203	96.3	C1203	115.6	C1203	0.6
Medium	IKAGRVGAEGY	2	1	1	Q5T1H1		0	2.56873e+07	0.023	0.1263	19.77	3.4779	2	1120.61	-0.746271	39.7291	0		0	B1503	465	B1503	5
Medium	QVSNLIHYL	1	1	1	Q6PIU2		0	7.88036e+06	0.023	0.1263	18.25	6.01113	2	1086.59	-0.408341	67.2847	0	C1203	44.44	A6802	26.7	A6802	0.25
Medium	ETFDQISKV	1	1	1	Q9H8L6		0	5.89791e+06	0.023	0.1263	16.28	9.46259	2	1066.54	0.791996	48.9869	0	C1203	77.78	A6802	5	A6802	0.02
Medium	ENAGIFYEA	1	1	1	Q5VT52		0	2.97072e+07	0.023	0.1263	15.91	8.26661	2	1013.46	-0.105851	64.2177	0	C1203	11.11	A6802	28.9	A6802	0.3
Medium	HQKKEFVKY	2	1	1	Q9BUL8		0	961351	0.023	0.1263	12.82	14.5461	3	1206.66	0.073154	19.8385	0	C1203	40.74	B1503	10	B1503	0.2
Medium	HTANIQTLI	2	1	1	Q8NG31		0	1.77951e+08	0.024	0.1263	28.61	0.352359	2	1010.56	-0.822263	51.5908	0	C1203	62.96	A6802	6.3	A6802	0.03
Medium	ETVGILHKV	6	1	1	Q96HH9		0	2.42432e+07	0.024	0.1263	28.09	0.203596	2	995.588	-0.760573	35.7688	0	C1203	70.37	A6802	2.3	A6802	0.01
Medium	LRNETNLAY	2	1	1	Q9P242		0	5.332e+06	0.024	0.1264	27.15	0.790382	2	1093.56	-0.366947	43.2045	0	C1203	44.44	B1503	8	B1503	0.15
Medium	ETNSILQEL	2	1	1	O60346		0	1.25727e+07	0.024	0.1263	25.78	1.17865	2	1046.54	0.188615	77.1618	0	C1203	74.07	A6802	20.7	A6802	0.2
Medium	EVASNVPKV	2	1	1	Q9Y5A9		0	6.80017e+06	0.024	0.1263	21.33	2.34003	2	942.525	-0.0881422	35.9582	0	C1203	48.15	A6802	12	A6802	0.1
Medium	YVNLPTIAL	1	1	1	P08865		0	4.33342e+06	0.024	0.1277	20.73	2.5388	2	1003.58	-0.698232	86.8122	0	C1203	44.44	C1203	31.5	C1203	0.15
Medium	IKKDVDEAY	4	1	1	P05787		0	1.01414e+06	0.024	0.1263	17.89	6.21772	2	1080.56	-0.59705	24.8629	0	C1203	40.74	B1503	63.6	B1503	1.4
Medium	LSFFVGYGV	1	1	1	P10620		0	1.63848e+07	0.024	0.1263	17.82	7.47926	2	988.514	-0.101962	93.6248	0	C1203	70.37	A6802	8.7	A6802	0.06
Medium	SKNPSKESF	1	1	1	Q96RL7		0	438416	0.024	0.1268	15.22	11.4532	2	1023.51	-0.163872	19.872	0	C1203	37.04	B1503	38.8	B1503	0.9
Medium	mIARSAATLI	1	1	1	Q9Y6C9	M1(Oxidation)	0	6.56497e+07	0.024	0.1263	10.84	27.4356	2	1062.6	0.504264	80.7466	0	C1203	11.43	A6802	69.3	A6802	0.6
Medium	AKIVAIKEF	3	1	1	Q9BXT8		0	3.00675e+07	0.025	0.1341	27.28	0.153209	2	1018.63	-1.17488	39.8869	0	C1203	44.44	B1503	16.6	B1503	0.4
Medium	EIAGPGFINV	1	1	1	P54136		0	9.92267e+06	0.025	0.1284	25.31	1.6633	2	1016.54	-0.116155	77.3256	0	C1203	31.43	A6802	9.6	A6802	0.07
Medium	KKSSGEIVY	5	1	1	Q02543		0	1.78264e+07	0.025	0.1289	21.57	1.42739	2	1010.55	-1.48711	23.0308	0	C1203	51.85	B1503	9.5	B1503	0.2
Medium	AQFKFTVL	1	1	1	Q9UQ80		0	1.11461e+07	0.025	0.129	15.89	5.95645	2	953.545	-0.450693	66.1026	0	C1203	43.33	B1503	38.5	B1503	0.9
Medium	STYPRPHEYL	2	1	1	Q9UBR2		0	2.70363e+07	0.025	0.1289	14.12	16.4526	3	1262.62	-0.123309	38.6644	0	C1203	51.43	A6802	130.9	C1203	0.7
Medium	ETIQIITKA	1	1	1	Q9UHP3		0	4.4534e+06	0.025	0.1289	13.35	10.4198	2	1016.6	0.119203	47.2546	0	C1203	33.33	A6802	12.6	A6802	0.1
Medium	SIAKNDTIYI	1	1	1	P55895		0	1.76697e+07	0.025	0.1292	10.87	23.5431	2	1137.62	-0.0118378	74.1469	0	C1203	11.43	A6802	399.1	A6802	1.9
Medium	FVASINLTL	1	1	1	Q8TC59		0	3.79797e+06	0.026	0.1454	35.23	0.0708852	2	977.566	-0.326854	84.4511	0	C1203	55.56	C1203	12.7	C1203	0.04
Medium	SKFAGGLHF	4	1	1	Q09666		0	6.41146e+06	0.026	0.1422	29.8	0.330788	2	963.504	-0.353091	44.291	0	C1203	37.04	B1503	2.6	B1503	0.01
Medium	TKVYGLmYF	4	1	1	Q9UP38	M7(Oxidation)	0	1.29502e+07	0.026	0.1413	27.13	0.798096	2	1137.56	-3.16414	82.2489	0	C1203	29.63	B1503	10.3	B1503	0.25
Medium	SKIKNALAH	3	1	1	P00846		0	413581	0.026	0.1424	26.76	0.238908	2	981.584	-0.123674	19.3754	0	C1203	3.7	B1503	417.9	B1503	4.5
Medium	SKTQVTVQY	1	2	2	Q00266;P31153		0	3.79038e+06	0.026	0.1359	26.19	0.729243	2	1053.56	-1.48592	37.2343	0	C1203	40.74	B1503	38.6	B1503	0.9
Medium	YTSRIVVRL	1	1	1	Q9HBE1		0	3.18931e+07	0.026	0.1396	15.65	2.10737	2	1106.67	-0.508945	47.4619	0	C1203	81.48	A6802	22.7	A6802	0.25
Medium	EAYGAVTQTV	4	1	1	Q15126		0	0	0.026	0.1357	15.06	12.3664	2	1038.51	-0.421832	71.3143	0	C1203	60	A6802	19.9	A6802	0.17
Medium	HQIKSLQY	6	1	1	Q9NW82		0	1.28934e+07	0.026	0.1442	12.6	23.2236	2	1016.55	-0.676758	28.7092	0	C1203	26.67	B1503	25.5	B1503	0.7
Medium	VAYPLYILY	1	1	1	Q99567		0	3.3326e+06	0.026	0.1344	12.33	18.3916	2	1114.62	0.120671	97.979	0	C1203	92.59	B1503	12.4	C1203	0.08
Medium	TVmEAISIL	2	1	1	Q9C0G6	M3(Oxidation)	0	9.54852e+06	0.027	0.1505	38.33	0.0312661	2	992.533	-0.373541	96.9269	0	C1203	44.44	C1203	32.2	C1203	0.15
Medium	ITVNEVELL	1	1	1	Q9UNM6		0	1.76744e+07	0.027	0.1536	29.04	0.409017	2	1029.58	-0.486004	99.241	0	C1203	70.37	C1203	543.5	C1203	1.8
Medium	AAYPEIVAV	2	1	1	Q17RS7		0	1.29712e+07	0.027	0.1476	26.69	1.1487	2	932.509	-0.158437	72.8017	0	C1203	96.3	C1203	14.9	C1203	0.05
Medium	YHGKTGRVY	1	1	1	P46778		0	785690	0.027	0.1474	20.54	3.31994	2	1080.56	-0.34078	18.4375	0	C1203	48.15	B1503	17.2	B1503	0.5
Medium	YKIYPGHGRRY	3	1	1	P83731		0	2.85437e+06	0.027	0.1511	19.59	4.64165	3	1409.74	-0.313568	24.7501	0		0	B1503	329.2	B1503	4
Medium	VQENGQRKY	2	2	2	Q9NQ94;A0AV96		0	509415	0.027	0.1462	14.44	15.1652	2	1121.57	-0.290391	17.2124	0	C1203	44.44	B1503	51.6	B1503	1.2
Medium	GTAAVFNAV	2	1	1	Q01581		0	7.73421e+06	0.028	0.1603	37.12	0.0985679	2	849.447	-0.0253498	57.9855	0	C1203	70.37	A6802	6.8	A6802	0.04
Medium	TTSDIDYAL	2	1	1	P49848		0	4.31732e+07	0.028	0.1613	34.43	0.0972661	2	998.468	-0.0734818	62.4969	0	C1203	74.07	A6802	9.1	A6802	0.07
Medium	SAGPGHSEL	5	1	1	Q7Z7M0		0	6.96319e+06	0.028	0.1559	33.52	0.100131	2	854.399	-1.06586	23.468	0	C1203	85.19	C1203	606.1	C1203	1.9
Medium	FLEVAQITL	1	1	1	Q92786		0	4.76692e+06	0.028	0.1631	26.12	0.584469	2	1033.59	-0.639145	72.934	0	C1203	48.15	C1203	553.3	C1203	1.8
Medium	FmLILVSYI	1	1	1	Q8NH06	M2(Oxidation)	0	3.3326e+06	0.028	0.1592	19.96	3.1741	2	1114.62	-3.0437	97.8944	0	C1203	37.04	C1203	250.9	C1203	1
Medium	DTAHVLFTL	1	1	1	Q6YHU6		0	2.41474e+07	0.028	0.1645	16.03	14.092	2	1016.54	-0.276606	75.6535	0	C1203	74.07	A6802	6	A6802	0.03
Medium	ESAGGFYYV	1	1	1	Q12769		0	14274453	0.028	0.1596	15.97	6.26507	2	992.435	-0.543004	67.3768	0	C1203	74.07	A6802	2	A6802	0.01
Medium	EVAMMPHLV	2	1	1	Q53EP0		0	1.67709e+07	0.028	0.1626	12.07	18.9738	2	1026.51	-0.471095	65.0158	0	C1203	44.44	A6802	6.5	A6802	0.04
Medium	EISRIFHYI	1	1	1	Q96EK7		0	1.71522e+07	0.028	0.1602	10.42	33.1264	2	1177.64	0.0602122	60.7313	0	C1203	33.33	A6802	3.8	A6802	0.01
Medium	HQSPSSSSY	2	1	1	O43298		0	524743	0.028	0.1549	10.07	13.107	2	979.411	-0.149833	19.9889	0	C1203	48.15	B1503	2.9	B1503	0.01
Medium	MSSSVAVQA	4	1	1	O75694		0	1.22247e+07	0.029	0.1755	34.27	0.18829	2	879.424	-0.106326	41.5892	0	C1203	40.74	A6802	36.2	A6802	0.4
Medium	AKGPTLTVY	1	1	1	Q13616		0	1.07251e+07	0.029	0.175	27.66	0.546495	2	949.535	-0.658989	43.5706	0	C1203	51.85	B1503	9.8	B1503	0.2
Medium	QVINNmQEV	1	1	1	Q6IWH7	M6(Oxidation)	0	4.34006e+07	0.029	0.168	27.57	0.737473	2	1090.52	3.83951	74.0994	0	C1203	40.74	A6802	41.1	A6802	0.4
Medium	HTADIQSEV	2	1	1	P08581		0	9.29127e+06	0.029	0.1683	26.97	0.626636	2	999.474	0.272712	33.0282	0	C1203	77.78	A6802	3	A6802	0.01
Medium	RALVPYAGVL	1	1	1	Q9UPQ8		0	1.58821e+07	0.029	0.1759	22.19	1.13482	2	1058.64	-0.530745	76.3623	0	C1203	68.57	B1503	303.1	C1203	3.5
Medium	QVGPVNENV	3	1	1	Q14966		0	2.25128e+07	0.029	0.1712	21.84	2.27781	2	955.484	-0.531686	46.4638	0	C1203	44.44	A6802	110.3	A6802	0.8
Medium	RHRDPQLFY	2	1	1	Q9P253		0	1.39796e+07	0.029	0.1673	21.4	3.26938	3	1231.63	-0.380203	33.096	0	C1203	44.44	B1503	20.1	B1503	0.5
Medium	NSSPVINHL	2	1	1	Q9Y2I9		0	2.65555e+07	0.029	0.1655	20.5	3.26866	2	980.515	-0.770969	38.9501	0	C1203	81.48	A6802	53.6	A6802	0.5
Medium	ALYPLLIRY	1	1	1	P21817		0	4.96749e+06	0.029	0.1668	16.86	2.09772	2	1121.67	-0.735745	85.9903	0	C1203	55.56	B1503	29.2	B1503	0.8
Medium	KKIRDTQKY	1	1	1	Q9GZR2		0	223845	0.029	0.174	11.39	10.8226	2	1179.68	-0.289628	16.4784	0	C1203	37.04	B1503	66.7	B1503	1.4
Medium	YIYASVRTL	1	1	1	Q9P0V3		0	5.93012e+06	0.029	0.1735	10.59	24.1857	2	1085.6	2.63719	83.6214	0	C1203	55.56	C1203	7.6	C1203	0.01
Medium	EAIDWLLGL	2	1	1	Q9Y224		0	5.67722e+06	0.03	0.1868	40.48	0.0361414	2	1029.56	-0.839927	107.37	0	C1203	81.48	A6802	16.6	A6802	0.15
Medium	LLVDQSKIY	1	1	1	O15403		0	3.55848e+07	0.03	0.1833	22.94	0.973125	2	1078.61	-0.806944	56.4412	0	C1203	44.44	B1503	54.6	B1503	1.2
Medium	RKIGRDQELY	1	1	1	P26639		0	2.72843e+07	0.03	0.1899	22.88	1.61988	3	1277.7	-0.216301	25.6117	0	C1203	31.43	B1503	89.7	B1503	1.7
Medium	HKVANTSSF	1	1	1	O43683		0	1.08628e+06	0.03	0.1919	21.11	3.44403	2	990.5	0.00148867	22.7646	0	C1203	29.63	B1503	4.8	B1503	0.05
Medium	LSNDIWLNV	1	1	1	Q9BXT5		0	3.53556e+07	0.03	0.1827	18.54	7.24776	2	1073.56	0.0357399	81.9776	0	C1203	74.07	A6802	131.2	C1203	0.7
Medium	SAFGASHHV	1	1	1	P10301		0	1.15148e+06	0.03	0.1816	17.79	4.84802	2	912.432	-0.0369998	22.2678	0	C1203	81.48	A6802	10.5	A6802	0.08
Medium	SQDPGTHVV	1	1	1	Q9H8H0		0	9.02514e+06	0.03	0.1925	16.84	6.71968	2	939.453	-0.411923	25.8092	0	C1203	48.15	B1503	409	B1503	4.5
Medium	FANGHVNSV	1	1	1	Q9NRL2		0	2.51115e+06	0.03	0.1775	14.7	10.4279	2	944.458	-0.267649	28.5611	0	C1203	85.19	C1203	5	C1203	0.01
Medium	GQIPEIIFY	1	1	1	Q9H0C5		0	2.73799e+06	0.031	0.1988	26.41	0.919725	2	1079.58	0.212006	93.234	0	C1203	51.85	B1503	11.1	B1503	0.25
Medium	KKSEGSLAY	3	1	1	Q96KP1		0	1.47416e+06	0.031	0.1962	24.11	1.25586	2	982.52	-0.111987	22.0902	0	C1203	48.15	B1503	5.5	B1503	0.07
Medium	EASTLLAGVA	1	1	1	C9JR72		0	3.07205e+08	0.031	0.1982	23.04	2.12914	2	931.509	-0.10122	74.3532	0	C1203	34.29	A6802	157.3	A6802	1.1
Medium	STNGLINFI	1	1	1	P06744		0	3.98869e+06	0.031	0.196	18.18	6.6676	2	978.526	0.0500693	84.0716	0	C1203	66.67	A6802	14.1	A6802	0.12
Medium	NTSSTNHQL	1	1	1	Q9H992		0	932156	0.031	0.205	16.11	6.17409	2	1001.46	0.0269039	18.3439	0	C1203	74.07	A6802	55.8	A6802	0.5
Medium	EVIKVFNDMKV	1	1	1	Q9Y281		0	5.88765e+06	0.031	0.1948	15.97	7.85094	3	1321.72	-0.20917	58.4052	0		0	A6802	240.9	A6802	1.4
Medium	TAYPGQTQY	1	1	1	Q99504		0	6.12825e+06	0.031	0.1946	14.95	8.77297	2	1028.47	-0.406618	43.1342	0	C1203	85.19	C1203	15.5	C1203	0.05
Medium	KLYPLEIVF	1	1	1	Q9NQT5		0	2.45031e+06	0.031	0.1954	14.95	4.21294	2	1121.66	0.234385	84.4082	0	C1203	48.15	B1503	6.3	B1503	0.09
Medium	ETHFGFETV	1	1	1	Q5HYK3		0	8.09361e+07	0.031	0.2063	12.27	18.3006	2	1066.48	-0.443695	57.3761	0	C1203	70.37	A6802	4.6	A6802	0.01
Medium	KKFGGPGARARY	1	1	1	P62249		0	1.73636e+06	0.031	0.2037	11.41	18.1235	3	1307.73	0.215493	20.988	0		0	B1503	103.5	B1503	1.9
Medium	EVAPVKDMA	1	1	1	P27816		0	2.44527e+07	0.031	0.2065	10.22	41.4131	2	959.486	-0.47697	37.805	0	C1203	11.11	A6802	27	A6802	0.25
Medium	ISPSLNVSL	1	1	1	P03891		0	9.45048e+07	0.032	0.2204	34.33	0.136762	2	929.53	-0.329709	71.4712	0	C1203	74.07	C1203	649.9	C1203	2
Medium	VSSPFIVSL	1	1	1	Q8WTQ7		0	2.23509e+07	0.032	0.2214	32.39	0.157717	2	948.539	-0.787591	92.8459	0	C1203	88.89	C1203	40	C1203	0.2
Medium	FHSNITSDL	1	1	1	Q8WUY3		0	2.27287e+07	0.032	0.2086	20.84	3.4655	2	1033.49	-0.482766	39.9859	0	C1203	44.44	B1503	388.4	C1203	2.5
Medium	AAQAHTREL	1	1	1	O75150		0	400366	0.032	0.2138	19.73	3.74578	2	996.522	-0.141537	18.6342	0	C1203	85.19	C1203	343.4	C1203	1.3
Medium	TSSRVIQSV	2	1	1	O75061		0	5.60768e+06	0.032	0.2141	19.68	3.49474	2	976.542	-0.123373	30.3028	0	C1203	74.07	A6802	64.4	A6802	0.6
Medium	ELSKIIQKV	1	1	1	Q5T4S7		0	6.4742e+06	0.032	0.2123	14.58	3.57917	2	1057.66	-0.99393	41.0051	0	C1203	44.44	A6802	187	A6802	1.2
Medium	QQVPVNQVF	1	1	1	P39023		0	1.17094e+07	0.032	0.2187	11.06	34.3025	2	1058.56	-0.9674	63.7227	0	C1203	40.74	B1503	4.5	B1503	0.04
Medium	ESLNIIINV	1	1	1	Q96NE9		0	7.46029e+06	0.033	0.2308	44.7	0.00948255	2	1014.58	-0.517656	86.9624	0	C1203	74.07	A6802	12	A6802	0.1
Medium	SLISTILEV	1	1	1	Q9Y263		0	1.71375e+08	0.033	0.2291	29.03	0.170723	2	974.577	-0.303327	77.4495	0	C1203	51.85	C1203	236.4	C1203	1
Medium	KLIDVTNIY	1	1	1	Q6P0N0		0	3.44523e+07	0.033	0.2231	27.21	0.364056	2	1078.61	-0.920118	56.4192	0	C1203	40.74	B1503	9.3	B1503	0.17
Medium	MSIETLLEA	1	1	1	Q99583		0	6.57082e+06	0.033	0.2337	26.54	0.707716	2	1006.51	-0.203276	99.1385	0	C1203	40.74	A6802	41.3	A6802	0.4
Medium	ETVELQISL	1	1	1	P62906		0	1.9682e+06	0.033	0.2284	26.42	0.901989	2	1031.56	-0.259988	85.2003	0	C1203	74.07	A6802	12.9	A6802	0.12
Medium	AKTQGGHVY	1	2	2	Q8NDN9;O95199		0	364186	0.033	0.2255	23.84	1.82753	2	960.49	-0.177735	16.6265	0	C1203	44.44	B1503	15.1	B1503	0.4
Medium	QKKDTGHVY	1	1	1	Q15208		0	878650	0.033	0.2278	15.92	11.0288	2	1075.55	-0.0792017	16.4942	0	C1203	44.44	B1503	66	B1503	1.4
Medium	RKPEGGPSF	1	1	1	P59923		0	1.05182e+06	0.033	0.2279	14.78	15.0462	2	974.505	-0.419514	23.504	0	C1203	33.33	B1503	49.4	B1503	1.1
Medium	ETAGMVRHI	1	1	1	Q8IZV5		0	2.32998e+06	0.034	0.2363	28.49	0.374619	2	1013.52	-0.571965	27.694	0	C1203	74.07	A6802	13.2	A6802	0.12
Medium	QTSAVVKNL	1	1	1	Q4VC31		0	4499697	0.034	0.2436	22.39	2.07867	2	959.552	-0.266675	35.8824	0	C1203	77.78	A6802	151.2	A6802	1
Medium	FVPFSFSLL	1	1	1	Q9Y487		0	8.50901e+06	0.034	0.2436	21.06	2.66914	2	1056.57	-2.79902	105.693	0	C1203	40.74	A6802	27.2	A6802	0.25
Medium	ETANKIFMV	2	1	1	Q14680		0	4.10239e+07	0.034	0.2363	19.66	4.22246	2	1052.54	-0.99442	56.0875	0	C1203	74.07	A6802	2.9	A6802	0.01
Medium	GKIRKDLKY	1	1	1	Q2TAY7		0	497066	0.034	0.243	17.93	0.93498	2	1120.68	-0.424886	21.0525	0	C1203	40.74	B1503	132.1	B1503	2.5
Medium	ETYLNISQV	1	1	1	O94768		0	5.65511e+06	0.034	0.2443	16.4	9.20471	2	1066.54	1.03966	49.179	0	C1203	74.07	A6802	7.9	A6802	0.05
Medium	LFAPFIVYY	1	1	1	Q9UBM7		0	2.90907e+06	0.034	0.2439	15.88	11.1412	2	1132.61	0.380181	105.165	0	C1203	55.56	B1503	209.8	C1203	2.5
Medium	LmNNHMKLI	3	1	1	O60287	M2(Oxidation)	0	1.39976e+07	0.034	0.2437	15.57	9.81617	2	1129.58	-2.99519	79.7121	0	C1203	33.33	B1503	242.4	C1203	1
Medium	KEKLHTLEEF	1	1	1	Q6PIF6		0	1.34219e+07	0.034	0.2401	13.91	18.164	3	1273.68	-0.180855	33.7327	0	C1203	31.43	B1503	112.6	B1503	2
Medium	TIPDFIFANV	1	1	1	P61073		0	3.97926e+06	0.034	0.2368	12.06	25.8877	2	1136.6	-0.11698	100.885	0	C1203	28.57	A6802	11.3	A6802	0.09
Medium	EVPHFHHEL	1	1	1	Q53EL6		0	5.70346e+06	0.034	0.2343	11.12	25.4907	2	1144.55	-1.11806	31.7286	0	C1203	40.74	A6802	28.3	A6802	0.3
Medium	EASAVIQGL	1	1	1	Q8IWA0		0	1.48188e+08	0.035	0.2463	37	0.103774	2	887.483	-0.478409	63.3641	0	C1203	81.48	A6802	28	A6802	0.3
Medium	ATIEmYTSI	1	1	1	P48553	M5(Oxidation)	0	1.35334e+07	0.035	0.2455	29.31	0.303716	2	1044.49	-3.34848	83.4814	0	C1203	66.67	A6802	43.3	A6802	0.4
Medium	EVISKTPTL	3	1	1	Q8IUR6		0	1.58712e+07	0.035	0.2458	18.36	3.55732	2	987.572	-0.372016	43.8096	0	C1203	44.44	A6802	84.5	A6802	0.7
Medium	NSFGFPQYV	2	1	1	O43929		0	3690218	0.035	0.2453	15.81	6.61828	2	1058.49	-0.0123536	78.893	0	C1203	77.78	A6802	6.2	A6802	0.03
Medium	ETANQEYKV	1	1	1	Q8WX93		0	6.61427e+06	0.035	0.2462	14.38	12.7646	2	1081.52	-0.472274	29.3171	0	C1203	70.37	A6802	12.6	A6802	0.1
Medium	EQFGWTVYI	1	1	1	Q9Y6A9		0	5.34014e+06	0.036	0.2488	20.99	2.82875	2	1142.55	0.500977	97.4032	0	C1203	40.74	A6802	25.8	A6802	0.25
Medium	ETFNHANGL	2	2	2	P67775;P62714		0	8.58143e+06	0.036	0.25	11.42	19.1887	2	1002.46	-0.421686	34.6568	0	C1203	70.37	A6802	9.2	A6802	0.07
Medium	TVSGYEAKV	1	1	1	Q6ZTN6		0	10525997	0.037	0.2526	25.73	1.00625	2	953.491	-3.38033	75.2034	0	C1203	44.44	A6802	62.1	A6802	0.6
Medium	GVIPYAGLSF	1	1	1	Q86VD7		0	2.98263e+06	0.037	0.2535	25.73	1.06853	2	1023.55	-0.526268	90.0887	0	C1203	40	B1503	123.3	B1503	2.5
Medium	RAALPLQLL	1	2	2	Q8NF91;Q8WXH0		0	5.02142e+06	0.037	0.2535	24.03	0.118412	2	994.641	-0.159556	72.4906	0	C1203	77.78	C1203	186.5	C1203	0.8
Medium	RKKEADSVY	1	1	1	P18583		0	209731	0.037	0.2529	23.48	1.49657	2	1095.58	-0.0639556	17.652	0	C1203	44.44	B1503	7.6	B1503	0.12
Medium	SVNLRSITY	1	1	1	Q86TM3		0	6.09809e+07	0.037	0.2525	20.93	2.28165	2	1052.57	-0.674343	29.3791	0	C1203	44.44	B1503	106.6	C1203	1.3
Medium	RQLLYITAF	1	2	2	O95298;E9PQ53		0	3757222	0.037	0.2527	12.64	10.0325	2	1124.65	-0.437247	72.8441	0	C1203	33.33	B1503	2.4	B1503	0.01
Medium	RAFNRIYVA	1	1	1	Q9UHX1		0	2.07019e+07	0.037	0.2522	10.59	19.2447	2	1109.62	-0.196356	40.0758	0	C1203	48.15	C1203	44.4	C1203	0.2
Medium	LTSNIIAWL	1	1	1	O60645		0	4.80781e+06	0.038	0.2557	27.33	0.741927	2	1030.59	-0.368976	97.9535	0	C1203	74.07	A6802	20.8	A6802	0.2
Medium	SSAEVIAQA	1	1	1	Q16555		0	1.00092e+07	0.038	0.2567	20.87	3.85292	2	875.446	-0.679241	41.9115	0	C1203	40.74	A6802	20.8	A6802	0.2
Medium	FSLPASLLL	1	1	1	Q8WVV5		0	476968	0.038	0.2543	20.17	1.84005	2	960.576	-0.727764	104.977	0	C1203	81.48	C1203	14.6	C1203	0.05
Medium	TASDKILIV	1	1	1	Q9P2L0		0	8.2875e+06	0.038	0.2583	15.52	4.39892	2	959.577	0.228097	52.0419	0	C1203	88.89	C1203	91.1	C1203	0.5
Medium	KTKEGVMYV	1	1	1	O76070		0	1.03456e+07	0.038	0.2573	13.44	14.2482	2	1054.56	-0.775233	32.0017	0	C1203	74.07	C1203	138.5	C1203	0.6
Medium	TKAKNVSSY	1	1	1	Q9UNF0		0	350377	0.038	0.2551	10.34	30.3162	2	997.531	0.047451	17.8339	0	C1203	44.44	B1503	12.4	B1503	0.3
Medium	mAQSRVLLLL	1	1	1	Q7Z5L7	M1(Oxidation)	0	1.00611e+07	0.039	0.2611	37.46	0.0256826	2	1159.69	0.323439	85.5345	0	C1203	60	B1503	84.9	C1203	1.6
Medium	EANDIVFSV	2	1	1	Q5T9L3		0	7.24487e+06	0.039	0.2646	30.39	0.450658	2	993.488	-0.414113	74.8174	0	C1203	81.48	A6802	3.8	A6802	0.01
Medium	KKGGPGVAL	1	1	1	P08047		0	1.54644e+06	0.039	0.2617	22.44	0.831014	2	826.515	0.00322552	22.8056	0	C1203	44.44	B1503	140.7	B1503	2.5
Medium	NSSPVLSKV	2	1	1	Q9NXE8		0	5.36231e+06	0.039	0.2647	19.36	5.1751	2	930.525	-0.340901	34.1446	0	C1203	77.78	A6802	13.9	A6802	0.12
Medium	NTFFSETGA	1	5	5	Q71U36;P68363;Q9BQE3;Q13748;Q6PEY2		0	1.07256e+07	0.039	0.2613	18.82	2.56732	2	973.426	-0.309645	60.4635	0	C1203	33.33	A6802	15.5	A6802	0.15
Medium	HKVSPMLY	1	1	1	Q13619		0	4.80528e+06	0.039	0.2633	14.23	21.6122	2	974.512	-0.654384	36.7305	0	C1203	26.67	B1503	205.6	B1503	3
Medium	KASSITREL	1	1	1	P30622		0	2.17212e+06	0.04	0.2675	33.65	0.105226	2	1004.57	-0.483444	25.4406	0	C1203	88.89	C1203	152.8	C1203	0.7
Medium	KGRTPGSSY	1	1	1	Q96BH1		0	543008	0.04	0.2659	23.1	1.87561	2	952.485	-0.164445	16.8691	0	C1203	37.04	B1503	69.8	B1503	1.5
Medium	AAMQDPEVM	1	2	2	P50502;Q8NFI4		0	8.63849e+06	0.04	0.2683	19.88	1.75791	2	991.422	-0.298153	50.5888	0	C1203	77.78	B1503	115.3	C1203	0.8
Medium	KSIARVLTV	1	1	1	P42766		0	9.48272e+06	0.041	0.2688	32.91	0.0346409	2	986.635	-0.631338	40.1938	0	C1203	77.78	C1203	34.7	C1203	0.15
Medium	VAYPEALTL	1	1	1	P48067		0	5.19815e+06	0.041	0.2699	25.01	1.17287	2	976.535	-0.240337	77.4771	0	C1203	96.3	C1203	15.1	C1203	0.05
Medium	AMHPQVNIY	2	1	1	Q16658		0	8.71113e+06	0.041	0.2702	22.78	1.67369	2	1072.52	0.114153	46.3517	0	C1203	51.85	B1503	5.8	B1503	0.07
Medium	IKKNNPRKY	1	2	2	P67809;P16989		0	325653	0.041	0.2706	12.62	6.67086	2	1160.69	-0.126163	16.0312	0	C1203	44.44	B1503	253.6	B1503	3.5
Medium	NPVDILTYV	1	4	4	Q6ZMR3;Q9BYZ2;P00338;P07195		0	5.29728e+06	0.042	0.2761	27.05	0.873882	2	1033.56	-0.0263332	89.8386	0	C1203	40.74	A6802	60.7	A6802	0.6
Medium	YIFEEPFTI	1	1	1	P08237		0	2.16583e+06	0.042	0.2778	16.79	6.70849	2	1158.57	0.345126	96.2925	0	C1203	48.15	C1203	17.6	C1203	0.06
Medium	SQATPHSSY	1	1	1	Q49A88		0	469421	0.042	0.2741	15.33	6.67657	2	977.432	-0.262796	21.6164	0	C1203	40.74	B1503	2.8	B1503	0.01
Medium	EVFPTQHVV	1	1	1	Q9HCG7		0	1.05297e+07	0.042	0.2755	15.1	11.6427	2	1055.55	-0.936298	49.1511	0	C1203	51.85	A6802	8.2	A6802	0.06
Medium	AAYGNVIVA	2	1	1	Q8NFZ4		0	1.34486e+07	0.043	0.2874	34.97	0.152205	2	877.478	-0.000567678	56.3922	0	C1203	59.26	C1203	60.8	C1203	0.3
Medium	AFAGKLLSVF	1	1	1	Q8WXG1		0	3.40992e+07	0.043	0.2878	28.48	0.238827	2	1052.61	-0.939246	89.4975	0	C1203	40	B1503	307.9	B1503	4
Medium	EIYSFSESL	1	1	1	P13010		0	6.35021e+06	0.043	0.2822	21.46	1.82375	2	1074.5	0.282808	77.7182	0	C1203	44.44	A6802	19	A6802	0.17
Medium	RKISGTTAL	1	2	2	P30622;Q9UDT6		0	4.0842e+06	0.043	0.2788	21.26	1.23598	2	946.568	-0.462496	23.8357	0	C1203	40.74	B1503	7.4	B1503	0.12
Medium	SVAEINVLI	1	1	1	Q9Y330		0	3405943	0.044	0.2997	25.63	0.789535	2	957.56	-1.1476	81.1748	0	C1203	40.74	A6802	5.9	A6802	0.03
Medium	SIAPIVIFA	2	1	1	Q9Y265		0	3.17618e+06	0.044	0.2883	21.75	1.74638	2	930.566	-0.422301	91.3707	0	C1203	18.52	A6802	14.6	A6802	0.12
Medium	FKmFGSLF	1	1	1	O94827	M3(Oxidation)	0	3.81912e+06	0.044	0.2929	18.95	4.40441	2	992.488	-2.6251	95.0704	0	C1203	40	B1503	20.6	B1503	0.5
Medium	FTFPLMAIV	1	1	1	Q02094		0	1.39569e+07	0.044	0.2957	18.81	3.87991	2	1038.57	-0.16552	100.491	0	C1203	81.48	A6802	6.7	C1203	0.01
Medium	SVAPSSTNV	1	1	1	P46379		0	8.49622e+06	0.045	0.3132	34.34	0.195329	2	861.431	-0.082836	36.4904	0	C1203	48.15	A6802	15.2	A6802	0.15
Medium	ASSPISHFL	1	1	1	Q9NVI1		0	1.21775e+07	0.045	0.3205	25.21	1.43901	2	958.499	-0.102445	48.2177	0	C1203	81.48	C1203	172	C1203	0.8
Medium	EAVAVIENI	1	1	1	Q9Y2L8		0	8.26294e+06	0.045	0.3076	19.66	3.93804	2	957.526	0.385362	69.0094	0	C1203	70.37	A6802	15.1	A6802	0.15
Medium	ETATIITQL	1	1	1	Q6ZU80		0	1.75476e+07	0.045	0.3209	15.34	7.34839	2	989.551	-0.321672	70.1012	0	C1203	74.07	A6802	6.2	A6802	0.03
Medium	RQAKEERTF	1	1	1	P35579		0	364549	0.045	0.3203	11.25	27.8248	2	1164.61	-0.160822	17.1667	0	C1203	40.74	B1503	5.3	B1503	0.06
Medium	GKRGGFNTF	1	1	1	P17844		0	1.79967e+07	0.045	0.3164	10.54	25.627	2	983.505	-0.875327	26.9696	0	C1203	37.04	B1503	14.4	B1503	0.4
Medium	QTFPNVREM	1	1	1	Q99958		0	1.09513e+07	0.046	0.3296	25.47	0.911681	2	1121.54	-0.690692	51.7053	0	C1203	81.48	C1203	19.5	C1203	0.07
Medium	QVSEVFNTV	1	1	1	Q9H0T7		0	6.67169e+06	0.046	0.3306	17.24	8.45915	2	1022.51	-1.28766	60.8463	0	C1203	48.15	A6802	4.7	A6802	0.02
Medium	YSSPVNSSA	1	1	1	O14964		0	6.81078e+06	0.047	0.3366	21.44	1.7952	2	911.41	-0.214372	37.4421	0	C1203	44.44	A6802	67.6	C1203	0.4
Medium	ASIMYACVLF	1	1	1	A6NH21		0	3.22689e+06	0.047	0.3366	19.1	4.32624	2	1117.54	-0.491968	98.5824	0	C1203	54.29	B1503	45.4	B1503	1.1
Medium	RKIPTGAEA	1	1	1	Q9Y6M7		0	941867	0.047	0.3366	13.87	11.7811	2	942.536	-0.357279	21.3637	0	C1203	11.11	B1503	409.8	B1503	4.5
Medium	ETNIRVVGGL	1	1	1	Q9BV94		0	8.81466e+06	0.048	0.3366	41.35	0.0266785	2	1057.6	3.85993	95.001	0	C1203	45.71	A6802	30.9	A6802	0.3
Medium	MAGPLRAPL	1	1	1	P01034		0	8.04744e+06	0.048	0.3366	30.25	0.107009	2	925.529	-0.192553	54.1591	0	C1203	81.48	C1203	92.8	C1203	0.5
Medium	MLTPPLLLL	1	1	1	Q07954		0	1.01804e+06	0.048	0.3366	24.63	0.205921	2	1010.63	-2.50359	101.332	0	C1203	48.15	C1203	158	C1203	0.7
Medium	EVVAGSHEL	1	1	1	Q01082		0	4.2335e+06	0.048	0.3366	19.81	3.46116	2	940.473	-0.177676	33.0852	0	C1203	40.74	A6802	25.7	A6802	0.25
Medium	IKPGTSVEY	1	1	1	Q96AT9		0	6.1813e+06	0.048	0.3366	12.45	22.8451	2	993.525	-0.652831	35.6358	0	C1203	48.15	B1503	83.1	B1503	1.7
Medium	SKHASGTSF	1	1	1	Q9ULD4		0	416960	0.048	0.3366	10.8	31.8316	2	921.442	-0.20941	17.8809	0	C1203	29.63	B1503	3.6	B1503	0.03
Medium	AMMmVGSLLY	1	1	1	Q8NCM2	M4(Oxidation)	0	4.10645e+07	0.049	0.3366	21.27	1.82619	2	1131.52	-3.17319	72.8025	0	C1203	34.29	B1503	10.8	B1503	0.25
Medium	KKIKTETY	1	1	1	Q8N5C6		0	178346	0.049	0.3366	17.94	2.67234	2	1010.59	-0.523742	17.5573	0	C1203	26.67	B1503	473.8	B1503	5
Medium	RKDPRQIFF	1	1	1	Q9P015		0	6.52407e+07	0.049	0.3366	16.16	6.86483	3	1206.67	0.149843	41.4602	0	C1203	40.74	B1503	123.7	B1503	2.5

## Sheet: Statistics
Total_Peptides	Tool	A*68:02	B*15:03	C*12:03
1952	Total Syfpeithi allelecoverage with threshold	0	0	669
	Total Syfpeithi allelecoverage with threshold %	0.0000	0.0000	0.3427
	Total NetMHC allelecoverage with threshold	820	829	708
	Total NetMHC allelecoverage with threshold %	0.4201	0.4247	0.3627
	Total NetMHC allelecoverage with 50nM threshold	595	549	310
	Total NetMHC allelecoverage with 50nM threshold %	0.3048	0.2812	0.1588
	Best Syfpeithi	0	0	1867
	Best Syfpeithi %	0.0000	0.0000	0.9565
	Best NetMHC	809	798	345
	Best NetMHC %	0.4144	0.4088	0.1767
	Best Syfpeithi with threshold	0	0	669
	Best Syfpeithi with threshold %	0.0000	0.0000	0.3427
	Best NetMHC with threshold	705	661	278
	Best NetMHC with threshold %	0.3612	0.3386	0.1424
	Best NetMHC with 50nM threshold	554	502	188
	Best NetMHC with 50nM threshold %	0.2838	0.2572	0.0963
