# Supplementary material for: TAPBPR mediates peptide dissociation from MHC class I using a leucine lever
Source: eLife. 2018 Nov 28;7:e40126. doi: 10.7554/eLife.40126 (PMC6307860; doi:10.7554/eLife.40126)
Supplement: Figure 5—source data 11. [file elife-40126-fig5-data11.xlsx]

## Sheet: Filteredpeptides
A6	Sequence	# PSMs	# Proteins	# Protein Groups	Protein Group Accessions	Modifications	ΔCn	Area	q-Value	PEP	XCorr	Charge	MH+ [Da]	ΔM [ppm]	RT [min]	# Missed Cleavages	best_Syf_Allele	best_Syf_Score	best_NetMHC_Allele_Rank	best_NetMHC_Rank
High	SKLPIGDVATQY	16	1	1	Q99832		0	1.05976e+07	0	7.062e-11	4.47164	2	1291.69	-0.0268771	54.2013	0		0	B1503	1.2346
High	KKFFGEFTGF	28	1	1	Q15029		0	4.45941e+07	0	8.742e-07	4.27824	2	1207.61	0.0930698	58.0575	0	C1203	42.86	B1503	0.4285
High	FSFDYIVKW	12	1	1	Q9BSJ2		0	9.385e+06	0	3.703e-08	4.12715	2	1204.6	-0.468442	80.1271	0	C1203	48.15	C1203	0.2257
High	GQYGNPLNKY	37	1	1	O14672		0	5.96657e+07	0	5.657e-09	3.99528	2	1153.56	-0.233372	40.7199	0	C1203	34.29	B1503	0.0242
High	YKIGDLTGY	12	1	1	Q9NVN8		0	3.79581e+07	0	7.225e-08	3.90323	2	1029.52	-1.15385	54.0021	0	C1203	44.44	B1503	0.0506
High	YGYDNVKEY	9	1	1	Q96GN5		0	3.20716e+06	0	2.32e-08	3.74113	2	1150.51	0.028902	40.1511	0	C1203	59.26	C1203	0.0081
High	ALIEFIRSEY	29	1	1	P26639		0	6.94569e+07	0	1.014e-07	3.73812	2	1240.66	0.403933	67.344	0	C1203	31.43	B1503	1.0203
High	YAYDGKDYIAL	25	17	17	P01892;P30447;P05534;P10316;P01889;P30460;Q04826;P30479;P30480;P30486;P18464;P30490;P30498;Q31610;P30499;P04222;P17693		0	3.46813e+07	0	1.556e-06	3.73797	2	1291.62	0.196527	58.6943	0		0	C1203	0.4676
High	KQFPEVIKY	23	1	1	Q9UIF9		0	2.33073e+07	0	2.187e-05	3.73562	2	1151.65	-0.14045	43.7065	0	C1203	55.56	B1503	0.0014
High	IAAVIARFY	10	1	1	P40305		0	2.65756e+06	0	7.113e-07	3.71283	2	1023.6	-0.30002	61.0783	0	C1203	81.48	C1203	0.4494
High	AKLPFTPLSY	13	1	1	Q9UM00		0	5.46917e+06	0	4.139e-07	3.70942	2	1136.63	-0.110859	65.39	0	C1203	48.57	B1503	0.0699
High	YCAEIAHNV	25	1	1	P62910		0	1.26581e+07	0	2.624e-06	3.69589	2	1019.46	-0.945056	38.3163	0	C1203	48.15	A6802	0.1841
High	KLFGSTSSF	24	1	1	P08174		0	3.11658e+07	0	7.4e-06	3.62899	2	973.498	-0.514244	48.1721	0	C1203	37.04	B1503	0.0127
High	AKWNPTAGVAF	13	1	1	P19387		0	1.09722e+07	0	1.632e-07	3.62596	2	1161.61	-0.131914	56.9632	0		0	B1503	0.5535
High	KKHSQFIGY	33	4	4	Q58FF7;Q58FG0;P07900;P08238		0	1.90345e+07	0	5.015e-06	3.59246	2	1107.59	-0.376934	26.7215	0	C1203	44.44	B1503	0.0501
High	MKLLTGLVF	15	2	2	P0DJI8;P0DJI9		0	2.17172e+07	0	1.065e-06	3.57048	2	1021.61	-0.610661	75.4781	0	C1203	37.04	B1503	0.1401
High	AKYPHVEDY	18	1	1	P61289		0	6.41095e+06	0	1.53e-07	3.54621	2	1121.53	-0.371695	32.4633	0	C1203	55.56	B1503	0.0063
High	GKYGTLQEF	13	1	1	O75182		0	9.25951e+06	0	0.0002236	3.53985	2	1042.52	-0.222633	44.5138	0	C1203	40.74	B1503	0.0148
High	RKPDEDMKLY	4	1	1	P52948		0	1.57736e+06	0	0.002396	3.52978	3	1294.65	0.306023	31.3022	0	C1203	34.29	B1503	1.1892
High	YQFTGIKKY	19	1	1	Q96IX5		0	3.19276e+07	0	2.208e-07	3.52305	2	1147.61	-0.611791	38.9491	0	C1203	51.85	B1503	0.0015
High	FAIDPHLLLSV	13	1	1	Q29RF7		0	2.1396e+07	0	4.432e-05	3.50849	2	1224.7	0.129695	85.7671	0		0	A6802	1.1874
High	SKLSFSQVF	11	1	1	Q9UJX4		0	1.0901e+07	0	7.553e-08	3.50731	2	1042.56	-0.23514	58.4473	0	C1203	37.04	B1503	0.031
High	VGVDFALKV	13	1	1	O14966		0	5.99718e+06	0	1.35e-06	3.50259	2	947.555	-0.733271	63.1392	0	C1203	48.15	C1203	1.2819
High	KKGPSGYGF	8	1	1	O14745		0	4.56945e+06	0	0.000333	3.49572	2	940.488	-0.882199	27.6827	0	C1203	37.04	B1503	0.0927
High	GKLPAGGVLY	10	1	1	P48634		0	5465966	0	5.005e-06	3.48979	2	974.567	-0.300965	47.518	0	C1203	34.29	B1503	0.1953
High	HKFPDEDSY	20	1	1	Q6VY07		0	7.56494e+06	0	0.002515	3.48841	2	1137.48	-0.0831313	31.5601	0	C1203	48.15	B1503	0.1563
High	FVNDIFERI	155	14	14	P33778;P62807;P58876;Q93079;P06899;O60814;Q99880;Q99879;Q99877;P23527;Q16778;Q5QNW6;Q8N257;P57053		0	9.47773e+08	0	6.438e-05	3.47798	2	1152.6	0.0561313	69.113	0	C1203	37.04	A6802	0.0163
High	KHFGTILNY	24	2	2	Q13829;Q9H3F6		0	2.32926e+07	0	0.002986	3.47231	2	1092.58	-0.572852	44.3046	0	C1203	51.85	B1503	0.0317
High	SQFGGGSQY	16	1	1	O15371		0	8.84517e+06	0	0.0001113	3.46108	2	930.395	-0.154956	36.498	0	C1203	44.44	B1503	0.0013
High	IKISNPTEF	15	1	1	Q9BXS6		0	7.77446e+06	0	2.831e-06	3.45046	2	1048.57	-0.651662	49.8609	0	C1203	40.74	B1503	0.0114
High	GKVGFQSFF	15	1	1	P60903		0	7.33505e+06	0	0.0005773	3.44056	2	1016.52	-0.394893	62.3745	0	C1203	33.33	B1503	0.296
High	RQYGSEGRFTF	11	2	2	Q7Z7H5;Q9BVK6		0	3.69485e+06	0	3.64e-07	3.43861	3	1347.64	-0.425938	40.5662	0		0	B1503	0.1337
High	RKYNELLKSY	6	1	1	P10909		0	1.761e+06	0	0.001494	3.43437	3	1313.72	0.0344774	34.0513	0	C1203	34.29	B1503	0.1027
High	VQGIFVEKY	14	3	3	P62834;P61224;A6NIZ1		0	6.59892e+06	0	8.002e-06	3.42795	2	1082.59	-0.0471148	50.3889	0	C1203	44.44	B1503	0.2769
High	FIYDSVKVY	7	1	1	Q00325		0	3.05172e+06	0	0.0008257	3.42513	2	1133.59	-0.597721	58.7068	0	C1203	59.26	C1203	0.0117
High	VKYIQQENF	7	1	1	Q6PJF5		0	2.62884e+06	0	3.338e-05	3.41956	2	1168.6	0.354232	42.7646	0	C1203	37.04	B1503	0.1248
High	FTADFVRQL	12	1	1	Q96Q15		0	6.4355e+06	0	0.0002079	3.40436	2	1096.58	-0.409183	61.1541	0	C1203	85.19	C1203	0.0142
High	GKIGTVMTF	14	1	1	P30046		0	7.42632e+06	0	0.0003752	3.40217	2	953.512	-0.15165	51.4846	0	C1203	40.74	B1503	0.013
High	GKLKQFDAY	8	1	1	Q9Y282		0	5.15502e+06	0	0.001178	3.39618	2	1069.57	-0.605011	32.5483	0	C1203	37.04	B1503	0.2617
High	IGVDFALKV	17	2	2	Q13637;P57729		0	1.36469e+07	0	1.553e-05	3.38795	2	961.571	-0.43121	66.3216	0	C1203	44.44	C1203	1.1246
High	AAASAIKVI	9	1	1	P14902		0	1.73591e+06	0	0.0002557	3.37416	2	843.53	0.0871638	41.3267	0	C1203	88.89	C1203	0.427
High	TTVEIFNKL	25	1	1	Q96QK1		0	5.64535e+07	0	0.0002504	3.37062	2	1064.6	-0.000834822	58.0143	0	C1203	70.37	A6802	0.0152
High	FGFHKPKMY	17	1	1	Q9NP50		0	1.27222e+07	0	4.914e-06	3.36693	2	1154.58	0.105092	36.3692	0	C1203	51.85	C1203	0.1929
High	GKIFTFGSY	7	3	3	P51003;Q9NRJ5;Q9BWT3		0	2.14362e+06	0	9.543e-06	3.36675	2	1019.52	-0.289898	58.8007	0	C1203	37.04	B1503	0.3162
High	GKLWNLNNY	3	1	1	Q6P2Q9		0	1.4076e+06	0	3.491e-05	3.36504	2	1121.57	-0.282971	54.1845	0	C1203	37.04	B1503	0.3939
High	SAYGSVKAY	24	2	2	P07355;A6NMY6		0	2.26283e+07	0	3.717e-05	3.35955	2	945.467	-0.455452	32.311	0	C1203	88.89	C1203	0.0083
High	VKVIQQESY	15	1	1	P60228		0	4.83145e+06	0	0.0002455	3.35036	2	1093.59	-0.5934	35.4143	0	C1203	40.74	B1503	0.1997
High	AAADSIKIW	7	1	1	Q9UNX4		0	2.81823e+06	0	4.14e-06	3.34608	2	974.53	-0.29785	54.8879	0	C1203	55.56	C1203	1.5532
High	SAVDFIRTL	30	1	1	Q9UEE5		0	8.89631e+07	0	0.0002049	3.34126	2	1021.57	-0.822467	65.7405	0	C1203	88.89	C1203	0.0059
High	KASGTLREY	26	1	1	Q02543		0	1.857e+07	0	4.248e-06	3.33929	2	1024.54	-0.177166	21.2672	0	C1203	88.89	C1203	0.2953
High	KLVDFVIHF	15	1	1	P59998		0	1.86744e+07	0	1.078e-06	3.33867	2	1117.64	0.162216	69.1251	0	C1203	40.74	B1503	0.1146
High	AKAPPTACY	25	1	1	P17676		0	1.86263e+07	0	8.291e-06	3.33619	2	921.45	-0.159173	29.7201	0	C1203	51.85	B1503	0.027
High	SSYLFIVKY	11	1	1	Q96QD8		0	1.00821e+07	0	2.88e-06	3.33034	2	1119.61	-0.367517	66.2778	0	C1203	77.78	C1203	0.3078
High	SIAGIFKEV	15	1	1	Q9NQQ7		0	6.63802e+06	0	4.276e-05	3.32967	2	963.551	0.127367	59.8366	0	C1203	51.85	A6802	0.0436
High	FKFVEQQSY	8	1	1	Q99590		0	1.67515e+06	0	1.418e-05	3.32899	2	1175.57	-0.323072	48.3209	0	C1203	44.44	B1503	0.0346
High	FSMYKPITY	8	1	1	Q68CL5		0	3.63774e+06	0	2.982e-05	3.32881	2	1149.56	-0.578234	56.8925	0	C1203	81.48	C1203	0.0087
High	AKAPPPVFY	6	1	1	Q16643		0	2.09918e+06	0	7.574e-05	3.31344	2	989.546	-0.00253636	45.2811	0	C1203	59.26	B1503	0.0077
High	GKLGFLASY	10	1	1	Q12772		0	6.45497e+06	0	0.000189	3.31023	2	955.524	-0.398393	56.7905	0	C1203	40.74	B1503	0.0566
High	YKAAAGEDY	13	1	1	P23381		0	3.57347e+06	0	0.0002071	3.30843	2	987.442	-0.32044	27.1941	0	C1203	44.44	B1503	0.2533
High	GKYFGGVLEY	10	1	1	O94955		0	1.2719e+07	0	0.0002314	3.30835	2	1132.57	-0.0555897	58.7756	0	C1203	40	B1503	0.08
High	SAVNIIRTF	9	1	1	P29728		0	1.77552e+06	0	1.171e-05	3.30707	2	1020.58	-0.393646	55.8195	0	C1203	77.78	C1203	0.0226
High	SNSDVIRQV	3	1	1	Q9Y5K5		0	7.47377e+06	0	0.0003096	3.29854	2	1017.53	-0.175104	33.7293	0	C1203	51.85	A6802	1.2171
High	GKAFFLSSY	9	1	1	O75123		0	4.75754e+06	0	0.0001679	3.29821	2	1019.52	-0.230031	57.1584	0	C1203	40.74	B1503	0.1579
High	AKWLQDEMF	11	1	1	Q14008		0	4.83317e+06	0	7.963e-07	3.29723	2	1167.55	-0.130875	62.3186	0	C1203	33.33	B1503	0.6086
High	RKLDPPGGQFY	17	1	1	O95400		0	1.01898e+07	0	4.007e-08	3.2806	2	1277.66	-0.101343	40.8632	0		0	B1503	0.5857
High	RKFPAGKVPAF	14	1	1	P26641		0	2.04075e+07	0	4.498e-06	3.27635	3	1217.72	0.238625	37.3847	0		0	B1503	0.1649
High	GKVGGLLAF	15	1	1	P28340		0	2.05416e+07	0	0.0001878	3.26571	2	861.519	-0.0552826	58.1749	0	C1203	37.04	B1503	0.0193
High	EVFDKTYQF	14	1	1	Q96EU6		0	9.11606e+06	0	0.0001792	3.26237	2	1176.56	-0.124826	54.1276	0	C1203	37.04	A6802	0.1371
High	MKVPNVLTF	3	1	1	Q9H6R0		0	2.07067e+06	0	0.0001767	3.25733	2	1048.59	-0.150938	66.74	0	C1203	48.15	B1503	0.0065
High	ALCDIKQAY	15	1	1	P25789		0	4.55519e+06	0	3.291e-05	3.25612	2	1024.51	-0.476703	45.6063	0	C1203	44.44	B1503	0.3816
High	DTFFRPLNV	9	1	1	Q13444		0	6.88887e+06	0	4.97e-05	3.25532	2	1108.58	-0.0744109	67.4223	0	C1203	77.78	A6802	0.0509
High	AKQDVVLNY	9	1	1	Q15029		0	2.05306e+06	0	8.948e-06	3.25338	2	1049.56	-0.186527	41.5796	0	C1203	51.85	B1503	0.0235
High	YAYLYIRML	8	1	1	O75643		0	4.01413e+06	0	5.295e-07	3.24903	2	1205.64	-0.228897	72.3639	0	C1203	88.89	C1203	0.0462
High	DTAEIFHSA	11	1	1	Q92538		0	4.24409e+06	0	0.0002238	3.24808	2	990.452	-0.304026	43.4867	0	C1203	37.04	A6802	0.0068
High	TKFETEQAL	5	2	2	Q04695;P08727		0	3.00035e+06	0	0.002153	3.24187	2	1066.54	-0.123638	38.273	0	C1203	44.44	B1503	0.5272
High	SKYEALQTF	11	2	2	O15525;O60675		0	2.62202e+06	0	9.868e-05	3.24097	2	1086.55	-0.405987	46.3858	0	C1203	40.74	B1503	0.0033
High	AKYESQTSF	9	1	1	Q9P0U4		0	1.43737e+06	0	0.0001677	3.23901	2	1060.49	0.0803446	31.2462	0	C1203	40.74	B1503	0.0018
High	GKYIPKQSF	9	1	1	Q9P0I2		0	4.39644e+06	0	4.026e-05	3.23702	2	1067.59	-0.471227	31.9738	0	C1203	33.33	B1503	0.022
High	GKIQFGYVY	12	1	1	Q969M3		0	1.75887e+07	0	0.0003163	3.23411	2	1074.56	-0.515936	54.6173	0	C1203	40.74	B1503	0.035
High	NKYLTAEAF	8	1	1	Q16658		0	4.56458e+06	0	8.166e-06	3.23247	2	1056.53	-1.05211	48.1729	0	C1203	33.33	B1503	0.1519
High	TKYLENQAF	9	1	1	Q99661		0	1.94862e+06	0	2.648e-06	3.22994	2	1113.56	0.119874	42.7112	0	C1203	33.33	B1503	0.0182
High	KSFEAPIKL	7	1	1	Q8TCT9		0	2.85073e+06	0	0.001735	3.22867	2	1032.61	-0.283935	46.4057	0	C1203	81.48	C1203	0.0402
High	YLADIFTKL	14	1	1	Q49AG3		0	8.32984e+06	0	1.859e-05	3.22269	2	1083.61	-0.17288	74.0034	0	C1203	48.15	C1203	0.0344
High	GKPPFEANTY	12	1	1	O14965		0	7.84681e+06	0	1.845e-06	3.21854	2	1123.54	0.0235113	39.9195	0	C1203	31.43	B1503	0.921
High	GKITDFIKF	11	1	1	P62701		0	1.24341e+07	0	0.000374	3.21769	2	1068.61	-0.274369	60.6611	0	C1203	33.33	B1503	0.0648
High	IKLPSVTSF	5	1	1	P18858		0	1.93032e+06	0	0.000285	3.21548	2	991.582	-0.532106	62.5668	0	C1203	40.74	B1503	0.0047
High	VKFGGQLLSF	8	1	1	Q08945		0	3.34413e+06	0	6.344e-07	3.21469	2	1095.62	0.256855	67.9728	0	C1203	51.43	B1503	0.1139
High	YKITAEEMY	6	1	1	Q9Y3B4		0	2.17183e+06	0	0.0002809	3.21281	2	1147.53	-0.777883	47.8446	0	C1203	40.74	B1503	0.2468
High	GKYPSWTFY	10	1	1	P04040		0	2.28271e+06	0	4.865e-05	3.20729	2	1148.54	-0.174262	61.2517	0	C1203	48.15	B1503	0.0371
High	SAISSVRLY	8	1	1	P42285		0	2.10503e+06	0	0.0006794	3.20701	2	995.552	-0.246987	49.216	0	C1203	85.19	C1203	0.0858
High	GHYLGEFSITY	18	1	1	P62841		0	3.32487e+07	0	2.583e-07	3.20628	2	1286.61	-0.0397653	64.7586	0		0	B1503	1.6918
High	KQIESKTAF	15	1	1	P10599		0	4.19033e+06	0	4.184e-06	3.20282	2	1051.58	-0.335536	24.1665	0	C1203	33.33	B1503	0.0018
High	KAYFDVKEY	10	1	1	Q9UJX2		0	2.8808e+06	0	5.814e-06	3.20127	2	1162.58	0.102555	41.6022	0	C1203	88.89	C1203	0.0916
High	FGFPGERTY	19	1	1	Q9Y4K0		0	2.83243e+07	0	2.699e-06	3.19955	2	1073.51	-0.054791	50.9892	0	C1203	59.26	C1203	0.0252
High	FVVDHVIKI	7	1	1	Q86UV5		0	5.17494e+06	0	3.034e-05	3.19673	2	1069.64	-0.286996	55.0376	0	C1203	44.44	A6802	0.0218
High	FAMEFVKYY	7	1	1	Q8IWV7		0	1.77438e+06	0	1.344e-05	3.19634	2	1197.56	-0.0537468	67.533	0	C1203	88.89	C1203	0.0073
High	GKLLIGTLY	12	1	1	Q15165		0	6.83216e+06	0	0.0001052	3.19507	2	977.603	-0.267525	60.9039	0	C1203	37.04	B1503	0.2399
High	FASGLIHRV	34	1	1	Q8N6L1		0	1.65244e+08	0	0.0001253	3.19228	2	999.573	-0.670081	38.7653	0	C1203	88.89	A6802	0.0309
High	LAAYHPWVV	14	1	1	Q5TA50		0	1.3346e+07	0	0.0009863	3.19114	2	1055.57	-0.349736	57.843	0	C1203	85.19	C1203	0.6113
High	YCSNLVRTL	1	1	1	Q9Y5B9		0	2.1428e+06	0	0.0001972	3.19092	2	1068.55	-0.309515	48.9357	0	C1203	55.56	C1203	0.778
High	RKFDAIYKY	9	1	1	Q5C9Z4		0	2.11646e+06	0	0.0001536	3.18998	3	1203.65	0.229803	35.3243	0	C1203	48.15	B1503	0.0043
High	GKYGFSDPLTF	5	2	2	Q92569;P27986		0	3.59186e+06	0	5.698e-05	3.18924	2	1231.6	0.00124482	66.2428	0		0	B1503	0.7111
High	NTVDFFNQI	32	2	2	Q9H8S9;Q7L9L4		0	6.32071e+07	0	0.002624	3.18788	2	1097.53	-0.286822	75.9877	0	C1203	62.96	A6802	0.0064
High	ETFPANIQV	18	1	1	Q5VYK3		0	3.73824e+07	0	0.0007337	3.18276	2	1018.52	-0.177772	65.1801	0	C1203	81.48	A6802	0.0025
High	SGFSGVIRL	17	1	1	P11309		0	1.00738e+07	0	4.504e-07	3.18246	2	935.531	-0.206319	58.3927	0	C1203	51.85	C1203	0.15
High	VKLPSGEDY	13	1	1	Q9Y2Z0		0	8.31011e+06	0	0.0001448	3.18032	2	1007.5	-0.604982	41.1216	0	C1203	48.15	B1503	0.276
High	DTFVHVTDL	15	1	1	P62263		0	1.09331e+07	0	0.001613	3.17688	2	1046.52	-0.26665	60.5225	0	C1203	74.07	A6802	0.4268
High	YAFAHILTV	6	1	1	O75204		0	9.50482e+06	0	5.089e-06	3.17666	2	1034.57	-0.264179	65.8655	0	C1203	92.59	C1203	0.0029
High	KAIDIILRC	35	1	1	Q9Y6K5		0	9.08369e+07	0	0.002453	3.17534	2	1044.62	-0.360729	52.9456	0	C1203	48.15	C1203	1.8325
High	DTAEIIKTL	10	1	1	P82909		0	6.88827e+06	0	8.553e-05	3.17055	2	1003.57	-0.352055	57.5841	0	C1203	85.19	A6802	0.0243
High	KLFLTGESY	10	1	1	P10619		0	2.60857e+06	0	1.306e-05	3.16964	2	1057.56	-0.60287	51.4921	0	C1203	40.74	B1503	0.0361
High	KQIFETIYY	15	1	1	P23921		0	1.55348e+07	0	1.582e-05	3.15984	2	1204.62	-0.0563178	59.9254	0	C1203	40.74	B1503	0.012
High	ASFDGRISVY	9	1	1	O94979		0	3.1369e+06	0	0.0002103	3.15273	2	1114.55	0.21068	51.6146	0	C1203	80	B1503	0.1962
High	AQGPTPRYF	9	1	1	O60427		0	7.98837e+07	0	0.0003122	3.15173	2	1036.52	-0.517007	40.637	0	C1203	48.15	B1503	0.0108
High	KQMEQISQF	14	2	2	P37802;Q9UI15		0	6.55056e+06	0	1.656e-06	3.15067	2	1138.56	-0.0820582	41.1778	0	C1203	37.04	B1503	0.0022
High	FAAFFSHIL	13	1	1	Q86XA9		0	5.99375e+06	0	1.627e-06	3.1486	2	1052.56	0.0216455	76.0887	0	C1203	81.48	C1203	0.1805
High	RKVYWFEKF	12	1	1	O60524		0	6.00411e+06	0	0.0001032	3.1474	3	1302.7	-0.113916	48.9285	0	C1203	29.63	B1503	0.4355
High	RAFEYEIRF	29	1	1	O60566		0	3.79701e+07	0	0.001759	3.14637	2	1230.63	0.200998	54.4985	0	C1203	77.78	B1503	0.0486
High	SKLWIIMEY	1	1	1	Q9P289		0	1.83539e+06	0	1.751e-06	3.14408	2	1182.62	0.153137	73.7213	0	C1203	44.44	B1503	0.2181
High	KAITFVTQY	7	1	1	Q9H0S4		0	6.49272e+06	0	0.0001371	3.14262	2	1070.59	-0.152324	50.0847	0	C1203	77.78	C1203	0.0505
High	AQNPANMSKY	8	2	2	P50502;Q8NFI4		0	857294	0	1.428e-05	3.1404	2	1123.52	-0.691214	29.7112	0	C1203	34.29	B1503	0.0106
High	SAYEIIRDY	11	1	1	O60287		0	5.53834e+06	0	4.973e-05	3.13929	2	1129.55	-0.238748	52.045	0	C1203	88.89	C1203	0.0162
High	TVFEHTFHV	2	1	1	P41250		0	1.36122e+07	0	2.107e-05	3.13915	2	1116.55	-0.4485	45.9091	0	C1203	44.44	A6802	0.0026
High	GKYLELLGY	15	1	1	O94979		0	9.43643e+06	0	0.0001715	3.13668	2	1055.58	-0.46756	64.7874	0	C1203	44.44	B1503	0.1584
High	GKFNVLLTTY	10	2	2	P51531;P51532		0	4.39609e+06	0	0.000282	3.13489	2	1155.64	-0.27757	61.7668	0	C1203	37.14	B1503	0.5712
High	VKGVSLSSY	5	1	1	Q9Y3B1		0	1.10464e+06	0	0.0002108	3.1335	2	939.514	-0.418881	40.0721	0	C1203	40.74	B1503	0.2068
High	IKISEGTGF	4	1	1	Q9Y2R4		0	1.13457e+06	0	4.769e-05	3.13247	2	951.514	-0.306327	44.9781	0	C1203	33.33	B1503	0.0238
High	TAVALLRLL	18	1	1	Q14165		0	4.78795e+06	0	2.443e-05	3.12812	2	969.645	-0.089645	74.9898	0	C1203	77.78	C1203	0.5334
High	FKFMPPPTY	23	1	1	Q9H3M7		0	2.03026e+07	0	0.0002853	3.12755	2	1127.56	-0.402409	60.21	0	C1203	51.85	B1503	0.0044
High	AQVWMITRY	9	1	1	Q9BVK8		0	2.18516e+06	0	0.0002481	3.12728	2	1167.6	0.0845836	59.4072	0	C1203	44.44	B1503	0.0294
High	YSFGHPSSV	12	1	1	P31327		0	4.88761e+06	0	1.591e-05	3.12535	2	980.447	-0.0511466	39.1743	0	C1203	81.48	C1203	0.0052
High	TLADVLYHV	12	1	1	Q9UBL3		0	4.49696e+06	0	0.0002037	3.12194	2	1030.56	-0.346625	65.226	0	C1203	44.44	A6802	0.0213
High	AAFAYTVKY	11	1	1	Q8N2K1		0	3.91564e+07	0	0.000459	3.12167	2	1033.54	0.231013	50.0246	0	C1203	85.19	C1203	0.0287
High	NAANIFERL	3	2	2	Q9Y6D6;Q9Y6D5		0	4.4466e+06	0	3.789e-05	3.12066	2	1047.56	0.0513936	57.4025	0	C1203	77.78	A6802	0.1099
High	EILDLIHKV	8	1	1	O14981		0	4.11862e+06	0	0.0015	3.11476	2	1079.65	-0.159078	58.6507	0	C1203	44.44	A6802	0.0185
High	ASGLIHRV	10	1	1	Q8N6L1		0	1.70465e+07	0	0.002871	3.11347	2	852.505	-0.0702091	38.6887	0	C1203	70	A6802	14.5201
High	FAFSGVLRA	18	1	1	Q92766		0	2.78339e+07	0	2.871e-06	3.11312	2	967.536	-0.224384	60.6753	0	C1203	55.56	C1203	0.208
High	YQADIERMY	11	1	1	O95573		0	6.5594e+06	0	1.657e-06	3.10746	2	1188.53	-0.491077	48.2174	0	C1203	51.85	B1503	0.0096
High	HVVDFFNRV	16	1	1	Q96BX8		0	1.37266e+07	0	2.957e-06	3.10509	2	1132.59	-0.503539	51.7257	0	C1203	40.74	A6802	0.0068
High	AAFLKAIGY	14	1	1	O75533		0	8.48935e+06	0	2.349e-05	3.10108	2	953.545	-0.0666408	58.0626	0	C1203	85.19	C1203	0.1556
High	AAANAIRVY	2	1	1	Q9NRK6		0	700096	0	0.0002292	3.10093	2	948.526	-0.397317	37.9196	0	C1203	92.59	B1503	0.0849
High	RAYQQSEAY	19	1	1	Q9P0W2		0	9.80645e+06	0	0.0001433	3.10085	2	1115.51	-0.644945	25.553	0	C1203	77.78	B1503	0.024
High	GQYNKEDPTSF	9	1	1	Q15437		0	1.50803e+06	0	1.935e-07	3.09817	2	1285.57	-0.043322	36.9322	0		0	B1503	0.1347
High	YCYDNIHFM	3	2	2	Q7L1Q6;Q9Y6E2		0	5.55644e+06	0	5.69e-06	3.09638	2	1205.48	0.3537	62.9786	0	C1203	44.44	C1203	0.0942
High	KEYERAIIF	13	1	1	P27105		0	8.3492e+06	0	0.00213	3.09425	2	1168.64	-0.187777	44.6482	0	C1203	40.74	B1503	0.0077
High	YKIAFPYLY	11	1	1	Q6P2Q9		0	5.13691e+06	0	2.07e-08	3.09326	2	1177.63	-0.0197945	73.168	0	C1203	44.44	B1503	0.0814
High	YKFDFPVSY	9	1	1	Q9NXE4		0	2.32543e+06	0	3.15e-05	3.09258	2	1165.56	0.194691	67.4806	0	C1203	55.56	B1503	0.0018
High	AKKISQLGY	5	1	1	P26196		0	2.72772e+06	0	0.001753	3.0897	2	1007.59	-0.499288	28.9894	0	C1203	44.44	B1503	0.2744
High	RTTDIVIRI	14	1	1	Q9C0C9		0	1.7906e+07	0	0.0001404	3.08861	2	1086.66	-0.346055	47.0293	0	C1203	70.37	A6802	0.1854
High	GKLKPTMAF	8	1	1	Q6YN16		0	2.04992e+06	0	0.0004172	3.08315	2	992.56	-0.0103604	37.7811	0	C1203	29.63	B1503	0.0167
High	FAYPAIRYL	45	1	1	P51398		0	1.15323e+08	0	0.0002891	3.08178	2	1113.61	0.00642786	66.5215	0	C1203	96.3	C1203	0.0012
High	YIKDFFEQm	8	1	1	Q5U649	M9(Oxidation)	0	1.68581e+06	0	4.801e-05	3.0803	2	1236.56	-0.388261	59.1531	0	C1203	37.04	C1203	0.1321
High	GQYSPPPYSEY	8	1	1	Q96BY9		0	4.69713e+06	0	0.001833	3.0787	2	1287.55	-0.125351	52.4071	0		0	B1503	0.0875
High	SSYDKPITF	7	1	1	Q86X10		0	1.97596e+06	0	1.933e-05	3.07837	2	1057.52	-1.16771	47.7858	0	C1203	77.78	C1203	0.0042
High	YKVEYPIMY	13	1	1	O14880		0	8.70913e+06	0	1.057e-05	3.07755	2	1205.59	0.186541	60.3572	0	C1203	51.85	B1503	0.0153
High	VKTGTITTF	30	1	1	P13639		0	3.97484e+07	0	0.0001775	3.07635	2	967.546	-0.342593	40.8566	0	C1203	44.44	B1503	0.0132
High	SVITQVFHV	14	1	1	Q00341		0	21097719	0	0.0005248	3.07165	2	1029.57	-0.34578	64.5738	0	C1203	40.74	A6802	0.03
High	VAFNWIIVH	7	1	1	Q92995		0	1.55853e+06	0	0.0005305	3.06672	2	1098.61	-0.312069	73.2663	0	C1203	55.56	C1203	2.0058
High	KQFQKVITEY	10	1	1	Q7KZF4		0	3.16001e+06	0	8.462e-05	3.06575	2	1283.7	0.141201	37.2549	0	C1203	37.14	B1503	0.0245
High	RQFEFSVDSF	12	3	3	Q96IP4;Q5VWP2;Q8NEK8		0	8.21636e+06	0	7.898e-06	3.05836	2	1261.59	0.237246	65.1569	0	C1203	40	B1503	0.027
High	KAFDFPSSF	10	1	1	Q7L945		0	3.93069e+06	0	0.0002277	3.0567	2	1045.5	-0.371636	62.5996	0	C1203	77.78	C1203	0.0036
High	AKVKFEERY	14	1	1	P61353		0	8.96494e+06	0	0.000189	3.05422	2	1169.63	0.116298	26.5228	0	C1203	40.74	B1503	0.2739
High	LLYESPERY	13	1	1	Q03518		0	5.41729e+06	0	4.77e-06	3.0524	2	1169.58	-0.377697	45.8874	0	C1203	48.15	B1503	0.1254
High	MKFIDNTLY	8	1	1	Q14116		0	4.18878e+06	0	0.0003814	3.05229	2	1144.57	-0.235137	59.0983	0	C1203	40.74	B1503	0.0414
High	FSNDIPHVV	13	1	1	Q8NI36		0	5.00384e+06	0	0.0008809	3.04755	2	1027.52	0.0372273	51.2796	0	C1203	81.48	A6802	0.0344
High	WAYPRQVFI	18	1	1	Q9P2D0		0	1.9175e+07	0	0.002281	3.04582	2	1179.63	0.143955	65.187	0	C1203	81.48	C1203	0.0611
High	FKFGDQGGF	8	1	1	P49790		0	4.28679e+06	0	7.711e-06	3.04134	2	1002.47	-0.676875	53.2139	0	C1203	40.74	B1503	0.2126
High	RQEGVPRTF	19	1	1	Q00403		0	1.78312e+07	0	1.623e-05	3.03502	2	1089.58	-0.464333	30.6479	0	C1203	44.44	B1503	0.0078
High	FVNDIFERIA	13	14	14	P33778;P62807;P58876;Q93079;P06899;O60814;Q99880;Q99879;Q99877;P23527;Q16778;Q5QNW6;Q8N257;P57053		0	7.06628e+06	0	7.705e-06	3.03156	2	1223.64	0.0441895	68.8365	0	C1203	14.29	A6802	1.0194
High	RKLEAAEDIAY	7	1	1	P35232		0	7.63043e+06	0	0.001574	3.02965	2	1278.67	-1.36036	38.559	0		0	B1503	0.652
High	GKKLFGEGY	6	1	1	Q92624		0	1.12791e+06	0	0.0003711	3.0239	2	998.53	-0.280676	33.8105	0	C1203	37.04	B1503	0.5297
High	SKFPTQISL	11	1	1	O15164		0	6.20507e+06	0	0.0005926	3.02327	2	1020.57	-1.10197	55.5798	0	C1203	51.85	B1503	0.061
High	LSFQEVREY	3	1	1	O00311		0	1.3207e+06	0	0.001283	3.02208	2	1170.58	-0.0822494	51.8115	0	C1203	81.48	C1203	0.2278
High	YKIKYPENF	7	3	3	P62136;P62140;P36873		0	2.12333e+06	0	0.0001223	3.01521	2	1201.63	0.473293	45.1662	0	C1203	37.04	B1503	0.0555
High	KHFEVLISY	2	1	1	Q86Y91		0	2.1044e+06	0	0.001606	3.01018	2	1135.61	0.125388	51.2142	0	C1203	48.15	B1503	0.0334
High	HKYSGKEGDKF	8	1	1	P26447		0	2.29292e+06	0	2.007e-07	3.00818	2	1295.64	-0.0434677	17.8571	0		0	B1503	1.2533
High	NVPEGLLATVTV	3	5	5	P54707;P05023;P50993;P13637;Q13733		0	4.24896e+06	0	4.242e-06	3.00724	2	1212.68	0.425717	79.3129	0		0	A6802	0.9815
High	KKLEELEQKY	6	1	1	P42224		0	2.53368e+06	0	2.565e-05	3.00398	3	1307.72	0.0416179	29.6849	0	C1203	31.43	B1503	0.9868
High	RLYGPSSVSF	16	1	1	P50454		0	1.13692e+07	0	1.88e-05	2.99933	2	1112.57	-0.537245	51.7839	0	C1203	42.86	B1503	0.1323
High	KQTQTFTTY	3	3	3	P54652;P17066;P11142		0	1.51323e+06	0	8.663e-06	2.99689	2	1117.55	-0.0139029	33.5107	0	C1203	40.74	B1503	0.0027
High	AKIVPKISY	13	1	1	Q7Z417		0	1.37468e+07	0	0.002521	2.99506	2	1018.63	-0.795733	39.6479	0	C1203	44.44	B1503	0.013
High	EVSFVIHNL	7	2	2	P49903;Q99611		0	2.90623e+07	0	9.18e-05	2.99322	2	1057.57	-0.49645	61.1895	0	C1203	44.44	A6802	0.0164
High	FISEIIHQL	3	1	1	Q9C040		0	2.82132e+06	0	4.415e-06	2.99213	2	1099.61	-0.101625	67.8268	0	C1203	51.85	A6802	0.0141
High	TTYDLTHTL	10	1	1	Q9NTJ5		0	5.33439e+06	0	0.001917	2.98942	2	1064.53	-0.186877	50.5145	0	C1203	77.78	A6802	0.0051
High	AKYPEIKSL	24	1	1	O15121		0	2.21642e+07	0	0.00123	2.98666	2	1048.6	-1.12019	38.7689	0	C1203	59.26	B1503	0.0541
High	KKPITTGGVTY	9	1	1	Q14192		0	2.74623e+06	0	0.0006854	2.98486	2	1164.66	0.156169	29.9233	0		0	B1503	0.9535
High	FLWAGGRASY	1	1	1	Q00839		0	2.1203e+06	0	0.001115	2.981	2	1127.56	-0.560174	55.5517	0	C1203	42.86	B1503	0.6614
High	IAIPFLIKL	15	1	1	Q8N2K0		0	6.83853e+06	0	0.0001942	2.98098	2	1027.69	-0.492106	86.619	0	C1203	85.19	C1203	0.0381
High	DTFSGIGKKFGL	7	1	1	Q15847		0	3.5952e+06	0	0.0002596	2.97781	2	1269.68	0.427248	61.9115	0		0	A6802	1.1225
High	KGSSAVRVY	9	1	1	P10914		0	2.01142e+06	0	0.0002741	2.97603	2	966.536	-0.327715	22.1949	0	C1203	55.56	B1503	0.7561
High	YKILGGSVL	14	1	1	Q15843		0	1.19789e+07	0	0.0007783	2.9737	2	949.572	-0.094214	57.1527	0	C1203	44.44	B1503	0.1272
High	GKSPLFGQYF	7	1	1	Q5VT66		0	1.76889e+06	0	0.002268	2.9719	2	1143.58	-1.12143	63.4305	0	C1203	37.14	B1503	0.6991
High	GQNPFELAF	5	1	1	Q9HBH9		0	1.90045e+06	0	2.505e-06	2.96463	2	1022.49	0.266113	81.3916	0	C1203	40.74	B1503	0.006
High	ITVSIIKEL	13	1	1	Q8TED0		0	8.1145e+06	0	0.0006358	2.96391	2	1015.64	-0.483907	64.2329	0	C1203	81.48	C1203	0.2229
High	GKFGGDFLVY	16	1	1	Q9BSV6		0	4.83574e+07	0	7.273e-05	2.96352	2	1102.56	-0.231414	63.6275	0	C1203	54.29	B1503	0.1223
High	VTYNYPVHY	5	1	1	Q9NV96		0	2.56525e+06	0	0.002821	2.95981	2	1155.55	-0.641362	47.2792	0	C1203	81.48	C1203	0.0317
High	RLWEQLVHF	24	1	1	Q5JS54		0	6.70017e+07	0	0.0005639	2.95837	2	1227.66	0.120918	64.4038	0	C1203	37.04	B1503	0.158
High	GKAWGILTF	19	1	1	P82930		0	8.80224e+06	0	0.0001626	2.95791	2	992.556	-0.233093	70.2785	0	C1203	44.44	B1503	0.0271
High	KKVGIVGKY	12	1	1	P61513		0	1.45421e+06	0	1.074e-07	2.95769	2	991.63	-0.175463	24.0872	0	C1203	44.44	B1503	0.0655
High	ILGPPGSVY	7	3	3	P51965;Q96LR5;Q969T4		0	2.41172e+06	0	0.0006	2.95491	2	902.498	-0.151608	58.793	0	C1203	48.15	B1503	0.0572
High	ETIPSEIQVFV	12	1	1	Q15646		0	2.40747e+07	0	6.905e-05	2.95438	2	1261.67	0.117969	82.3189	0		0	A6802	0.339
High	GKAEVAVTLY	6	1	1	Q9NSG2		0	2.27775e+06	0	0.002723	2.95145	2	1050.58	-0.906594	47.4424	0	C1203	28.57	B1503	0.256
High	IQKAVSEGY	5	1	1	P32320		0	521049	0	6.727e-07	2.94949	2	994.52	-0.233379	28.3903	0	C1203	37.04	B1503	0.0187
High	TVFNFQEKV	8	1	1	Q14204		0	3.66035e+06	0	7.913e-05	2.94586	2	1111.58	-0.207607	53.5475	0	C1203	40.74	A6802	0.0273
High	TQFVSGSKY	3	1	1	Q6VMQ6		0	549635	0	0.0006588	2.93418	2	1016.5	-0.133855	33.4331	0	C1203	40.74	B1503	0.0078
High	KAIDYIRFL	7	1	1	P36956		0	6.46969e+06	0	0.000233	2.93068	2	1138.66	0.287833	61.5428	0	C1203	85.19	C1203	0.0125
High	KKSDPVVSY	28	1	1	P13639		0	2.52862e+07	0	0.0006725	2.92559	2	1022.55	0.201634	26.0591	0	C1203	51.85	B1503	0.0042
High	GKFQDNFEF	12	2	2	Q15691;Q9UPY8		0	6.67584e+06	0	0.001409	2.91957	2	1131.51	0.166579	54.9176	0	C1203	37.04	B1503	0.0536
High	LAVPFCVNF	24	1	1	Q9Y266		0	1.42559e+07	0	0.0007503	2.9184	2	1009.52	-0.459485	90.2369	0	C1203	77.78	C1203	1.4236
High	KQTQIFTTY	7	2	2	P34931;P08107		0	2.4552e+06	0	0.0004075	2.91751	2	1129.59	-0.0253048	43.9375	0	C1203	40.74	B1503	0.0027
High	GKAFSQSSY	7	3	3	Q9UNY5;Q8NF99;Q9NQZ8		0	645884	0	0.000798	2.91381	2	974.458	0.313145	27.7504	0	C1203	40.74	B1503	0.1022
High	YKYQHDDGRVSY	6	1	1	P60983		0	603020	0	3.308e-06	2.91301	3	1530.7	-0.573651	28.0006	0		0	B1503	0.1119
High	YTSDLHFQV	10	1	1	Q1KMD3		0	5.93739e+06	0	0.0001781	2.91274	2	1109.53	-0.155674	54.1776	0	C1203	77.78	A6802	0.0061
High	ITGPLIRIL	19	1	1	Q92616		0	1.31912e+07	0	0.0005873	2.91218	2	995.661	-0.418917	67.859	0	C1203	81.48	C1203	0.7313
High	SVSPVVRVAV	28	1	1	P13639		0	9.35729e+07	0	0.0007151	2.91144	2	1012.61	-0.214897	48.8873	0	C1203	25.71	A6802	0.1278
High	ISPSHIWIF	13	1	1	O94915		0	5.43988e+06	0	0.001032	2.90741	2	1099.59	0.131165	72.6255	0	C1203	66.67	C1203	1.4075
High	AQFETKKLY	17	1	1	O60613		0	1.56826e+07	0	0.001218	2.90504	2	1127.61	-0.456641	34.0611	0	C1203	51.85	B1503	0.004
High	FVNEIISRI	5	1	1	P43246		0	5.68293e+06	0	0.0001994	2.90061	2	1090.63	-0.368258	62.5097	0	C1203	40.74	A6802	0.022
High	NVAEIVIHI	20	1	1	Q9BZD4		0	1.90132e+07	0	0.0002905	2.89837	2	1007.59	-0.388061	65.0779	0	C1203	44.44	A6802	0.0034
High	EAAAVFKTL	10	1	1	Q8IWZ6		0	3.47999e+06	0	0.001218	2.8974	2	949.535	-0.551493	49.5627	0	C1203	85.19	A6802	0.1297
High	SGYYRVSSY	5	1	1	Q9UNQ0		0	1.03017e+06	0	0.002134	2.89688	2	1081.5	0.243631	36.992	0	C1203	44.44	C1203	0.065
High	FVFPGELLL	16	1	1	Q15758		0	5.05708e+07	0	0.0001746	2.88992	2	1034.59	-0.532545	99.331	0	C1203	55.56	C1203	0.0124
High	AKVANASYY	7	1	1	O15042		0	990344	0	0.0007036	2.88786	2	986.494	-0.0649891	29.7527	0	C1203	40.74	B1503	0.0678
High	KGYPSEFSTY	7	1	1	P49674		0	1.43982e+07	0	0.002162	2.88779	2	1178.54	0.495193	44.1639	0	C1203	34.29	B1503	0.7928
High	EVSPVSFHQV	17	1	1	Q8N543		0	2.19339e+07	0	1.575e-05	2.88669	2	1128.57	-0.679399	47.7269	0	C1203	25.71	A6802	0.0332
High	DVATITKTV	2	1	1	P57740		0	890608	0	0.0009344	2.88454	2	947.541	-0.141722	42.6339	0	C1203	48.15	A6802	0.0298
High	TIPDFIFANV	6	1	1	P61073		0	2.22713e+06	0	0.001841	2.88185	2	1136.6	-0.00958012	90.3349	0	C1203	28.57	A6802	0.1469
High	YAKLIAEL	12	1	1	Q8NI27		0	1.08313e+07	0	0.001395	2.88127	2	920.545	-0.097503	54.5437	0	C1203	93.33	C1203	1.1616
High	YVSEILEKV	2	1	1	P42704		0	2.40752e+06	0	0.002049	2.8773	2	1079.6	-1.72116	55.6842	0	C1203	48.15	A6802	0.0089
High	SAIPHPLIM	17	1	1	P61201		0	1.1998e+07	0	0.0009192	2.8757	2	978.544	-0.411356	55.852	0	C1203	81.48	C1203	0.0063
High	HKVETFSGVY	4	1	1	P62081		0	2159915	0	0.0001526	2.87555	2	1166.58	0.376274	36.6577	0	C1203	34.29	B1503	0.5763
High	GQFLVKSGY	12	1	1	Q9NZI8		0	3.66921e+06	0	0.0007543	2.87487	2	998.53	-0.209537	42.7787	0	C1203	40.74	B1503	0.0481
High	KQFRPPMGGY	12	1	1	Q9UKK9		0	3.14403e+06	0	0.0002688	2.87443	2	1180.59	-0.554302	37.3009	0	C1203	42.86	B1503	0.0437
High	YKLLGGLAV	37	1	1	P23396		0	9.50169e+07	0	0.001969	2.87419	2	933.577	-0.317757	62.4455	0	C1203	44.44	B1503	0.9261
High	STSDIITRI	18	2	2	P49585;Q9Y5K3		0	8.41691e+07	0	0.0004738	2.8731	2	1005.56	-0.544873	49.0938	0	C1203	70.37	A6802	0.0093
High	SSSGIVYKV	5	1	1	Q9P2E3		0	1.046e+06	0	0.001331	2.87268	2	939.514	-0.288952	38.174	0	C1203	77.78	A6802	0.0342
High	FAISILQQI	29	2	2	P60842;Q14240		0	1.36743e+07	0	9.664e-05	2.87179	2	1032.61	-0.392466	87.5119	0	C1203	74.07	C1203	0.0765
High	SAAEEVKTY	3	1	1	Q5JRA6		0	341295	0	9.174e-05	2.86951	2	997.483	-0.684232	28.4486	0	C1203	92.59	C1203	0.1392
High	YKEDHPFEY	7	1	1	Q9H0R8		0	3.03291e+06	0	1.384e-06	2.86787	2	1227.53	0.26779	36.7584	0	C1203	51.85	B1503	0.1293
High	NKADVILKY	1	2	2	P47813;O14602		0	1.25686e+06	0	0.0009967	2.86638	2	1063.61	-0.219834	38.0846	0	C1203	51.85	B1503	0.0896
High	KSKDFVQVm	18	1	1	P78527	M9(Oxidation)	0	1.56805e+06	0	1.243e-05	2.86637	2	1097.57	-0.268661	30.6584	0	C1203	70.37	C1203	0.0946
High	DQAEIRSLV	5	2	2	P09913;O14879		0	3.68317e+06	0	0.0007682	2.86633	2	1030.55	-0.137205	50.1205	0	C1203	44.44	A6802	0.5213
High	GKFPSLLTH	33	1	1	P62906		0	9.90079e+07	0	0.001031	2.86498	2	999.562	-0.416306	43.8325	0	C1203	18.52	B1503	0.9746
High	GQYSTGKTTF	4	3	3	Q9H4M9;Q9NZN3;Q9H223		0	814656	0	0.002442	2.86448	2	1089.52	0.0224528	31.63	0	C1203	31.43	B1503	0.0118
High	MKLSLVAAM	5	1	1	P11021		0	2.1464e+06	0	0.0006294	2.86282	2	963.537	-0.0982607	61.4521	0	C1203	37.04	B1503	0.478
High	QKLIFTVGY	3	1	1	Q8TDB6		0	1.24341e+07	0	0.002673	2.86146	2	1068.61	-0.484119	60.5065	0	C1203	40.74	B1503	0.606
High	VKVVPTVY	9	1	1	Q9Y282		0	2.21672e+06	0	0.001824	2.85788	2	904.55	-0.384698	45.3686	0	C1203	36.67	B1503	0.4625
High	RQYAKDIGF	10	1	1	P62273		0	9.50529e+06	0	0.003019	2.85014	2	1097.57	-0.854362	36.1085	0	C1203	37.04	B1503	0.0026
High	FKNPIIEKY	7	1	1	P00973		0	1.8753e+06	0	1.115e-05	2.84582	2	1151.65	-0.0344531	43.1955	0	C1203	51.85	B1503	0.0386
High	SQYPFPVTL	22	1	1	Q5R372		0	1.59238e+07	0	2.056e-05	2.84559	2	1051.55	0.0425433	78.9179	0	C1203	59.26	B1503	0.007
High	SAFPFPVTV	12	1	1	Q96K37		0	4.63332e+06	0	0.0007212	2.84319	2	964.514	-0.178148	83.5453	0	C1203	96.3	C1203	0.0042
High	SIYGSYRNF	9	1	1	Q7L576		0	4.16798e+06	0	0.0001849	2.84243	2	1106.53	-0.344008	47.2261	0	C1203	40.74	C1203	0.1909
High	YKVPDGMVGF	1	1	1	Q96AE4		0	0	0	0.002945	2.84237	2	1112.54	-0.611624	59.9142	0	C1203	34.29	B1503	0.1454
High	VKVIDRILY	12	1	1	O75533		0	6.37838e+06	0	0.0001781	2.83783	2	1118.69	-0.406437	49.3621	0	C1203	44.44	B1503	0.1472
High	YAFPKAVSVFF	10	1	1	O15427		0	4.47575e+06	0	0.001961	2.83526	2	1275.68	0.496006	79.1693	0		0	C1203	0.9612
High	YGYRQSVTY	10	1	1	P08174		0	2.2307e+06	0	0.0002756	2.83398	2	1136.54	0.478607	37.5282	0	C1203	51.85	C1203	0.0393
High	TQMPDPKTF	14	1	1	Q9Y5V0		0	1.09475e+07	0	0.002688	2.83377	2	1064.51	-0.626968	44.6886	0	C1203	48.15	B1503	0.009
High	RQQPPSTTTF	7	1	1	A3KN83		0	1.41487e+06	0	3.204e-07	2.83251	2	1162.58	-0.857792	32.9717	0	C1203	37.14	B1503	0.0083
High	YAFPKAVSVF	24	1	1	O15427		0	4.7423e+07	0	7.902e-05	2.83126	2	1128.61	-0.250923	66.0342	0	C1203	77.14	C1203	0.059
High	FAYGGWNYL	7	1	1	Q01650		0	1.02612e+07	0	0.0004304	2.83108	2	1090.5	0.0310655	78.8826	0	C1203	85.19	C1203	0.0035
High	MTSEIHNTV	8	1	1	O43264		0	5.60548e+06	0	0.001831	2.83078	2	1031.48	-0.185971	30.461	0	C1203	77.78	A6802	0.0035
High	QKIDVQESF	4	1	1	O95602		0	3.07896e+06	0	0.00159	2.83046	2	1093.55	0.0699858	43.852	0	C1203	33.33	B1503	0.0609
High	NAFSGVMmL	53	1	1	Q9NTX5	M8(Oxidation)	0	9.21406e+06	0	0.001431	2.83043	2	985.448	-0.235111	70.9476	0	C1203	85.19	C1203	0.0302
High	EVAGILEPVGL	10	1	1	O95229		0	3.88962e+06	0	0.001183	2.82572	2	1096.63	0.226485	80.7529	0		0	A6802	0.3333
High	QAFPLIIKL	7	1	1	Q14CZ7		0	1.14128e+07	0	0.001634	2.8216	2	1042.67	-0.155579	76.2032	0	C1203	92.59	C1203	0.0287
High	ETFKDFPQm	14	2	2	P15170;Q8IYD1	M9(Oxidation)	0	2.74984e+06	0	4.41e-05	2.81955	2	1158.51	-0.358311	48.9146	0	C1203	62.96	A6802	0.2512
High	FSFPGELLm	72	2	2	P43003;P48664	M9(Oxidation)	0	1.13476e+07	0	2.482e-06	2.8186	2	1056.51	0.0202335	82.1754	0	C1203	77.78	C1203	0.0263
High	EVFRIGNVEI	9	1	1	P15927		0	3.33855e+06	0	2.735e-05	2.81606	2	1175.64	0.357492	70.1214	0	C1203	20	A6802	0.2481
High	GKYFEPEAY	6	1	1	Q96NE9		0	2.13599e+06	0	8.179e-06	2.81526	2	1103.5	0.120435	44.7069	0	C1203	44.44	B1503	0.0289
High	GKLQKTVSY	1	1	1	P12757		0	658582	0	0.001854	2.812	2	1023.58	-0.289072	25.9526	0	C1203	40.74	B1503	0.0306
High	GKKKYETEF	15	1	1	Q96QD8		0	7599374	0	0.001519	2.81071	2	1129.59	-0.0430104	21.938	0	C1203	33.33	B1503	0.1692
High	SIWPLIRIY	4	1	1	Q9UBH6		0	3.13304e+06	0	0.001871	2.79801	2	1160.68	-0.645255	80.4982	0	C1203	51.85	C1203	0.4748
High	AQLHPLSGY	2	1	1	Q7L7V1		0	857943	0	0.0009395	2.79735	2	985.51	-0.311556	41.2305	0	C1203	40.74	B1503	0.0144
High	FLYPFPLAL	25	1	1	Q5BJD5		0	3.01267e+07	0	0.00115	2.79628	2	1080.61	-0.480296	102.037	0	C1203	59.26	C1203	0.0127
High	KKIEFGVVY	7	1	1	P29218		0	3.7172e+06	0	0.0007598	2.79615	2	1082.62	-0.961198	45.611	0	C1203	48.15	B1503	0.0033
High	SQFGTVTRF	27	1	1	Q9BYG3		0	8.05797e+07	0	0.002369	2.7959	2	1042.53	-0.231773	46.1627	0	C1203	40.74	B1503	0.0015
High	EVFPLAMNYL	10	3	3	P24385;P30279;P30281		0	2.72786e+06	0	0.0004035	2.7948	2	1196.6	0.439044	91.156	0	C1203	40	A6802	0.0835
High	KKIESSGVTY	1	1	1	Q9UKN8		0	733726	0	8.466e-06	2.78785	2	1111.6	0.12019	25.2613	0	C1203	31.43	B1503	0.0258
High	LQRLENTQY	5	1	1	Q96D70		0	739453	0	0.0003116	2.78764	2	1164.6	-0.240283	35.0965	0	C1203	37.04	B1503	0.0108
High	KKIEKLEEY	12	1	1	O95786		0	3.31031e+06	0	4.795e-05	2.78759	2	1179.66	0.0200086	25.1053	0	C1203	44.44	B1503	0.027
High	HSFDKVWIC	15	1	1	P51636		0	1.25828e+07	0	0.0008792	2.78386	2	1134.54	-0.0305311	52.5334	0	C1203	40.74	A6802	1.8722
High	SQFKGYFIF	23	1	1	Q9NY27		0	3.46652e+07	0	0.0005266	2.78074	2	1136.58	-0.303775	70.2532	0	C1203	33.33	B1503	0.0094
High	TQREFMLSF	7	1	1	Q96GM5		0	3.63154e+06	0	0.0001981	2.78028	2	1158.56	-0.154109	64.1126	0	C1203	37.04	B1503	0.0105
High	STADVIQHC	6	1	1	Q5SRE5		0	3.01007e+06	0	0.0008714	2.77398	2	973.441	-0.0090791	33.6392	0	C1203	40.74	A6802	0.3628
High	EIASITEQL	10	1	1	Q5UIP0		0	8.43639e+06	0	0.003069	2.77272	2	1003.53	-0.339067	61.8138	0	C1203	44.44	A6802	0.0153
High	SSAPTARVF	10	1	1	O94906		0	4.66272e+06	0	3.354e-05	2.77143	2	935.494	-0.19238	37.0192	0	C1203	77.78	C1203	0.1048
High	SKNVSGISF	8	1	1	P49792		0	1.54516e+06	0	0.0005781	2.77056	2	938.494	-0.4148	41.9303	0	C1203	33.33	B1503	0.015
High	KLFIGGLSF	12	4	4	Q32P51;P09651;P22626;P51991		0	1.30432e+07	0	6.908e-05	2.76889	2	981.577	-0.312406	73.4654	0	C1203	37.04	B1503	0.0119
High	FKWSGENSY	5	1	1	Q8NI08		0	2.05778e+06	0	0.0001715	2.76835	2	1117.5	0.0997015	44.5731	0	C1203	44.44	B1503	0.0393
High	GKFFSQMSY	1	1	1	P17014		0	792259	0	0.002959	2.76675	2	1094.5	0.691928	51.2498	0	C1203	40.74	B1503	0.0405
High	FKVGDPEEY	9	1	1	Q8WYP3		0	2.96406e+06	0	0.001474	2.76598	2	1083.5	-0.380558	45.1069	0	C1203	51.85	B1503	0.3282
High	RKFYKGKKY	14	1	1	P42766		0	7.2123e+06	0	0.0008488	2.76392	3	1217.72	0.196289	17.6557	0	C1203	44.44	B1503	0.0393
High	FKFGKELTF	10	1	1	Q5T447		0	4.32525e+06	0	0.002494	2.76173	2	1116.61	-1.02783	55.3137	0	C1203	48.15	B1503	0.0171
High	AAFEKALEV	9	1	1	Q13325		0	6.4753e+06	0	0.002044	2.75408	2	977.53	-0.333979	49.4001	0	C1203	92.59	C1203	0.0125
High	SAIDRIFTL	10	1	1	Q86TU7		0	1.70936e+07	0	0.0004455	2.75374	2	1035.58	-0.305035	69.9004	0	C1203	85.19	C1203	0.0032
High	RKLDQVSQF	8	1	1	O60502		0	5.49149e+06	0	0.0001379	2.75326	2	1120.61	-0.30162	33.4377	0	C1203	37.04	B1503	0.0086
High	ELINIIDGV	10	1	1	Q8NI22		0	3.98428e+06	0	0.0003092	2.74956	2	985.557	0.0140208	81.34	0	C1203	40.74	A6802	0.0378
High	AQKPFGATY	8	1	1	Q96QD5		0	2.71907e+06	0	0.0002801	2.74945	2	982.499	-0.28631	35.1725	0	C1203	51.85	B1503	0.0009
High	RKFPADYIKY	7	1	1	Q7Z333		0	2.55415e+06	0	1.952e-05	2.7449	3	1300.7	-0.143206	42.3924	0	C1203	40	B1503	0.0593
High	YGYEHILTL	11	1	1	Q96AX1		0	8.65519e+06	0	0.0005146	2.74246	2	1108.57	-0.369098	63.1323	0	C1203	59.26	C1203	0.0034
High	NTATIFHEL	20	1	1	Q9UHD2		0	5.10008e+07	0	0.001594	2.74193	2	1045.53	-0.372932	53.3617	0	C1203	74.07	A6802	0.0071
High	KAVSLFLCY	9	1	1	P09912		0	2.83361e+06	0	0.000537	2.73936	2	1043.56	-0.425218	66.8239	0	C1203	81.48	C1203	1.647
High	MPAFIFEHI	16	1	1	O00560		0	9.60693e+06	0	0.001324	2.73936	2	1104.55	-0.540085	73.6263	0	C1203	33.33	A6802	0.7009
High	SKMFHPNVY	10	2	2	P49459;P63146		0	2.96319e+06	0	0.001254	2.73828	2	1122.54	0.0867956	35.3193	0	C1203	44.44	B1503	0.0085
High	GKVKLVVRY	5	1	1	Q9NUP9		0	3.1048e+06	0	0.0001946	2.7348	2	1061.68	-0.565757	31.7501	0	C1203	44.44	B1503	0.1554
High	KQVKYFIHY	8	1	1	Q9UBU8		0	1.70201e+06	0	3.908e-05	2.73468	3	1225.67	0.0774533	35.5564	0	C1203	40.74	B1503	0.012
High	TAAQVARVL	4	1	1	A5YKK6		0	2.04401e+06	0	0.001103	2.73311	2	928.557	-0.141822	38.9984	0	C1203	85.19	C1203	0.1716
High	KKFHGYFKF	9	1	1	P36639		0	1.71609e+06	0	0.0007712	2.72444	3	1201.65	0.199189	34.6305	0	C1203	33.33	B1503	0.0295
High	TVSEVIQGL	9	1	1	Q8WWW0		0	2.36622e+06	0	0.002625	2.72363	2	945.525	-0.244687	63.2792	0	C1203	48.15	A6802	0.0154
High	RHWGGQADF	8	1	1	Q6PJG6		0	2.50907e+06	0	0.001317	2.7232	2	1073.49	-0.401536	32.7135	0	C1203	33.33	B1503	0.2508
High	AKLFPGSPAIY	2	7	7	P49792;P0DJD0;P0DJD1;A6NKT7;Q7Z3J3;Q99666;O14715		0	1.04517e+06	0	0.0008562	2.72215	2	1163.65	-0.777015	59.8083	0		0	B1503	1.4215
High	GKVRTDITY	19	1	1	P62701		0	2.28867e+07	0	0.003075	2.72111	2	1052.57	-0.21995	29.9116	0	C1203	44.44	B1503	0.128
High	STFIGEHYV	3	1	1	P08581		0	2.19462e+06	0	0.0002602	2.72099	2	1052.5	-0.53521	48.842	0	C1203	70.37	A6802	0.0172
High	TKYLFQVTF	2	1	1	Q9NQX4		0	889936	0	0.0003004	2.72095	2	1146.62	0.240014	69.8228	0	C1203	40.74	B1503	0.1321
High	YMIDPSGVSY	7	1	1	P25788		0	6.85807e+06	0	4.932e-05	2.7207	2	1131.5	0.226236	64.6315	0	C1203	48.57	B1503	0.0334
High	AAYGYGIRY	8	3	3	P11216;P06737;P11217		0	1.1151e+07	0	0.0008361	2.72002	2	1033.51	-0.110241	45.5571	0	C1203	88.89	C1203	0.0164
High	LAIEHVRFF	11	1	1	Q8NEM2		0	3.0483e+06	0	0.002209	2.71918	2	1131.63	-0.0745175	59.4868	0	C1203	77.78	C1203	0.0599
High	YKLPDNVTF	8	1	1	Q00796		0	1.30497e+06	0	0.0006826	2.71917	2	1096.57	-0.391376	59.0279	0	C1203	48.15	B1503	0.024
High	SKKIDRHmY	12	1	1	P84098	M8(Oxidation)	0	3.61664e+06	0	7.121e-05	2.7183	2	1193.61	-0.145526	17.083	0	C1203	37.04	B1503	0.5279
High	KLYQSIIGY	14	1	1	Q9NSV4		0	1.24354e+07	0	0.001086	2.71764	2	1084.6	-0.614379	54.8781	0	C1203	48.15	B1503	0.0529
High	EVLDFITHL	32	1	1	Q13057		0	7.94811e+07	0	0.002373	2.71716	2	1086.58	-0.31484	79.385	0	C1203	44.44	A6802	0.0081
High	KHQEHILRF	22	1	1	Q13263		0	6.91636e+06	0	0.001771	2.71033	3	1207.67	0.258464	28.7235	0	C1203	40.74	B1503	0.1374
High	GQAPPGKAL	14	1	1	A8MPP1		0	2.67522e+06	0	0.0001154	2.70931	2	838.478	0.164325	25.0146	0	C1203	51.85	B1503	0.0584
High	SKEDDVRQY	11	1	1	P62753		0	1.02498e+06	0	9.333e-05	2.70885	2	1139.53	-0.123672	20.5416	0	C1203	48.15	B1503	0.5897
High	IIVDIFHGL	4	1	1	Q9Y4E8		0	1.80601e+06	0	0.0007283	2.70653	2	1026.6	-0.334416	77.4367	0	C1203	40.74	A6802	0.0896
High	YTFGRIVIY	11	1	1	Q9UBB9		0	1.01967e+07	0	0.003077	2.69658	2	1131.62	-0.0484217	66.4905	0	C1203	85.19	C1203	0.0068
High	ELAEIVFKV	13	1	1	Q9Y2R5		0	6.22292e+06	0	6.613e-05	2.69556	2	1047.61	-0.314435	68.6518	0	C1203	48.15	A6802	0.0159
High	SKIAGILHY	3	1	1	P14735		0	1.50186e+06	0	0.001997	2.69366	2	1001.58	-0.430444	43.5258	0	C1203	44.44	B1503	0.0072
High	ASYPELRLF	18	1	1	O75718		0	1.66709e+07	0	0.0001081	2.68818	2	1095.58	-0.056361	67.4162	0	C1203	77.78	C1203	0.1506
High	IAFPTSISV	10	1	1	Q9UQ80		0	4.80068e+06	0	8.821e-05	2.68574	2	934.524	-0.250159	74.7516	0	C1203	88.89	C1203	0.0073
High	FKNILTEIY	6	1	1	Q15907		0	1.42114e+06	0	0.0001194	2.68565	2	1140.63	0.0711726	67.0156	0	C1203	40.74	B1503	0.5049
High	YAYDGKDYIA	16	17	17	P01892;P30447;P05534;P10316;P01889;P30460;Q04826;P30479;P30480;P30486;P18464;P30490;P30498;Q31610;P30499;P04222;P17693		0	1.44787e+07	0	0.0009599	2.68419	2	1178.54	0.391615	44.5521	0	C1203	45.71	A6802	0.9072
High	YAFPKAVSV	12	1	1	O15427		0	8.84356e+07	0	0.0002609	2.68109	2	981.54	-0.475487	53.0133	0	C1203	92.59	C1203	0.0015
High	HKRIHGVGF	11	1	1	P62899		0	3.29334e+06	0	0.0005212	2.67776	2	1050.6	-0.322539	25.6251	0	C1203	33.33	B1503	0.105
High	KKKTEDEHF	3	1	1	Q9ULW0		0	522573	0	0.002972	2.6753	2	1161.59	-0.64771	16.8069	0	C1203	29.63	B1503	0.6352
High	RQFPVTVHF	11	1	1	Q8IY37		0	9.01468e+06	0	0.0002763	2.67272	2	1130.61	0.162808	50.3752	0	C1203	44.44	B1503	0.0015
High	FKIDVGFVY	8	1	1	Q9NZM1		0	2.22035e+06	0	0.0006307	2.67175	2	1087.58	-0.0922973	72.3183	0	C1203	48.15	B1503	0.0366
High	FAYPNRPDVL	14	1	1	Q03518		0	1.32049e+07	0	0.001231	2.67093	2	1191.62	-0.172191	54.1705	0	C1203	80	C1203	0.1481
High	AQLWTDLQY	2	1	1	Q63HN8		0	973982	0	0.0007476	2.66653	2	1137.56	0.0100355	73.2064	0	C1203	44.44	B1503	0.0593
High	YAFPKSITVF	17	1	1	P53985		0	1.03001e+07	0	1.225e-05	2.66392	2	1172.64	-0.00335622	69.2779	0	C1203	77.14	C1203	0.0324
High	SKLGWIYEF	2	1	1	P62699		0	1.70972e+06	0	0.001106	2.66296	2	1142.59	-0.578824	71.7673	0	C1203	40.74	B1503	0.1368
High	WQKGIGEFF	15	1	1	Q15004		0	1.0192e+07	0	1.898e-05	2.66171	2	1111.56	-0.645237	63.646	0	C1203	33.33	B1503	0.1056
High	AAYSDGYGRVY	3	1	1	O43251		0	1.25495e+06	0	0.0005224	2.65954	2	1221.55	0.810163	40.5691	0		0	B1503	1.0068
High	FAYPAIRYLL	14	1	1	P51398		0	5.94386e+06	0	0.0002652	2.65789	2	1226.69	0.33408	76.8133	0	C1203	68.57	C1203	0.2327
High	HVFDHPWETV	11	1	1	Q9Y3B1		0	6.00985e+06	0	0.0003581	2.65523	2	1266.59	0.109214	51.3844	0	C1203	37.14	A6802	0.0334
High	IGVEHVVVY	14	1	1	P49411		0	2.30372e+07	0	0.002579	2.65158	2	1014.56	-0.375826	50.5823	0	C1203	51.85	C1203	0.1241
High	VAINHIVDF	11	1	1	P78346		0	6.68663e+06	0	0.001492	2.65143	2	1027.56	-0.331861	60.0979	0	C1203	77.78	C1203	0.1101
High	SQYPFPVTLY	8	1	1	Q5R372		0	2.98217e+06	0	7.546e-05	2.65067	2	1214.61	0.366735	82.0112	0	C1203	34.29	B1503	0.0041
High	AAFDQWREW	1	1	1	Q16555		0	2.35799e+06	0	0.001655	2.64767	2	1208.55	0.19882	63.9959	0	C1203	55.56	C1203	0.6721
High	FVIDPVRNL	7	1	1	P58107		0	6.19279e+06	0	0.001098	2.64706	2	1072.61	-0.0890694	62.6435	0	C1203	51.85	C1203	0.0069
High	EAAEVILRV	44	1	1	P78371		0	5.91363e+08	0	0.0004254	2.64609	2	999.583	-0.387085	54.6345	0	C1203	88.89	A6802	0.0081
High	HQQPPSQQY	11	1	1	Q15532		0	1.0572e+06	0	0.001817	2.64484	2	1112.51	-0.394685	22.8954	0	C1203	44.44	B1503	0.0037
High	NLYGSPREY	22	1	1	Q9NZM1		0	2.71057e+07	0	0.0008855	2.64341	2	1098.52	-0.167013	37.3777	0	C1203	55.56	B1503	0.1427
High	IALPSLRIL	22	1	1	P00403		0	1.9916e+07	0	0.000429	2.64283	2	995.661	-0.54152	74.4065	0	C1203	85.19	C1203	0.1144
High	YLKDFFSNV	6	1	1	O95786		0	3.80654e+06	0	0.001644	2.63777	2	1132.57	-0.163372	63.7218	0	C1203	44.44	A6802	0.5346
High	EVFGVIRSL	11	1	1	Q15393		0	5.04093e+06	0	0.0009587	2.63142	2	1019.59	-0.333439	63.4236	0	C1203	51.85	A6802	0.0286
High	RKLDFPSASF	3	1	1	O60344		0	2.01319e+06	0	0.002371	2.62682	2	1167.62	-0.0797483	49.5866	0	C1203	37.14	B1503	0.0456
High	FATPFLVVR	20	1	1	P15954		0	3.15437e+07	0	0.0004788	2.62556	2	1049.61	-0.0933286	66.0881	0	C1203	55.56	C1203	3.519
High	AQFPNGPQF	12	1	1	Q99595		0	8.86673e+06	0	3.559e-05	2.62525	2	1005.48	-0.275532	58.7815	0	C1203	44.44	B1503	0.0011
High	SKIVIVMEY	9	1	1	Q9H093		0	4.36272e+06	0	0.001212	2.62484	2	1081.6	-0.340706	57.4631	0	C1203	44.44	B1503	0.1027
High	KQIHFLYQY	1	1	1	Q14204		0	1.42191e+06	0	0.0002095	2.62307	2	1239.65	-0.0453048	47.1018	0	C1203	37.04	B1503	0.0595
High	YVFDGKPPQL	12	1	1	P39748		0	4.72389e+06	0	0.0002985	2.61613	2	1163.61	-0.451107	57.8561	0	C1203	57.14	C1203	0.1729
High	TTIDVRTTF	10	1	1	Q8IY21		0	4.50512e+06	0	0.0004865	2.61554	2	1053.56	-0.230386	50.5198	0	C1203	66.67	C1203	0.021
High	FKNIQPSSF	1	1	1	Q9BVQ7		0	1.16378e+06	0	0.001982	2.61399	2	1067.55	-0.811427	45.4933	0	C1203	37.04	B1503	0.027
High	RLLDTTITF	7	1	1	Q8N766		0	1.23059e+07	0	5.701e-05	2.61391	2	1079.61	-0.373137	65.0848	0	C1203	40.74	B1503	0.0141
High	EAAFFEGHFL	8	1	1	Q5W0V3		0	3.8754e+06	0	0.0003122	2.61251	2	1167.55	-0.68616	68.9713	0	C1203	60	A6802	0.7464
High	LKPGMVVTF	13	2	2	P68104;Q5VTE0		0	7957650	0	0.001459	2.61111	2	991.564	-0.430418	57.0314	0	C1203	44.44	B1503	0.3724
High	GKGKFGNVY	8	3	3	O14965;Q96GD4;Q9UQB9		0	3.67951e+06	0	0.002509	2.60848	2	969.515	-0.0370776	26.2246	0	C1203	40.74	B1503	0.0932
High	HTINGHNAEV	8	1	1	P22626		0	4.58123e+06	0	0.001233	2.6074	2	1091.52	-0.453343	21.1	0	C1203	45.71	A6802	0.0866
High	FSWEGAFQHV	3	1	1	P26641		0	2.47218e+06	0	0.0007304	2.60595	2	1207.55	-0.0871064	66.5968	0	C1203	60	A6802	0.8301
High	TTFEHAHNM	9	1	1	P13639		0	1.0406e+06	0	0.001576	2.60046	2	1087.46	-0.129988	23.2481	0	C1203	66.67	A6802	0.0346
High	SMGPVRVAF	13	1	1	P29279		0	1.01195e+07	0	0.001106	2.60023	2	963.508	0.246059	53.3646	0	C1203	40.74	B1503	0.0604
High	AKFDGILGM	6	1	1	P07339		0	2.37276e+06	0	2.854e-05	2.5996	2	951.497	-0.328646	61.7073	0	C1203	48.15	B1503	0.0166
High	SKLTQILSY	2	1	1	Q13123		0	1.01218e+06	0	0.0009004	2.59611	2	1052.6	-0.329755	56.7112	0	C1203	44.44	B1503	0.0308
High	GKTSLITRF	5	2	2	P20340;Q9NRW1		0	4.40735e+06	0	0.001004	2.59501	2	1022.6	-0.357631	37.8005	0	C1203	37.04	B1503	0.1631
High	GKVTGDTVY	7	1	1	Q6UX04		0	849304	0	0.002295	2.59369	2	939.478	-0.28572	28.7736	0	C1203	40.74	B1503	0.0783
High	SIAQIIVTV	3	1	1	Q9UNQ0		0	2.79905e+06	0	0.002493	2.59307	2	943.582	0.152355	75.871	0	C1203	51.85	A6802	0.0211
High	AKLKKFIAY	8	1	1	P33992		0	2.419e+06	0	0.0006782	2.59292	2	1081.68	-0.399472	34.1403	0	C1203	44.44	B1503	0.0278
High	YTFPGILKW	4	1	1	Q9H7D0		0	1.33453e+06	0	0.002672	2.59091	2	1124.61	0.224113	75.738	0	C1203	51.85	C1203	0.0307
High	GKVFFTEKF	2	1	1	Q9H3U5		0	956356	0	0.0009414	2.59072	2	1102.59	-0.0218148	46.862	0	C1203	29.63	B1503	0.5448
High	QLVDIIEKV	11	1	1	P61289		0	9.46883e+06	0	0.002723	2.59006	2	1056.63	0.0579025	64.6246	0	C1203	44.44	A6802	0.1489
High	KKIPSTVEF	8	1	1	Q9H2G9		0	3.25621e+06	0	0.0006569	2.5882	2	1048.6	-0.547669	36.2597	0	C1203	44.44	B1503	0.0044
High	YVTDVLYRV	13	1	1	Q96Q15		0	1.513e+07	0	0.003077	2.58784	2	1127.61	-0.77254	59.679	0	C1203	44.44	A6802	0.008
High	FSKDIFSVI	38	1	1	Q01650		0	8.2157e+07	0	0.0004369	2.58479	2	1055.58	-0.139577	70.6075	0	C1203	70.37	C1203	0.11
High	VALNFIISY	4	2	2	P50616;Q14106		0	1.94984e+07	0	0.0003073	2.57899	2	1039.58	-0.674052	85.2496	0	C1203	85.19	C1203	0.0706
High	EVFQGVEKL	4	1	1	Q9Y330		0	2.81552e+06	0	0.002162	2.57737	2	1048.57	-0.544782	50.6106	0	C1203	44.44	A6802	0.0422
High	GQWGGGSHY	23	1	1	B1AH88		0	14463852	0	0.002907	2.5694	2	948.395	-0.407977	28.9754	0	C1203	40.74	B1503	0.0081
High	EVFNYIHNI	6	1	1	Q8N3P4		0	4.88182e+06	0	4.032e-05	2.56798	2	1148.57	-0.29914	59.3073	0	C1203	37.04	A6802	0.0055
High	GKLVQIEY	14	1	1	P25787		0	9.92868e+06	0	0.00277	2.56779	2	949.535	-0.0804774	46.9108	0	C1203	36.67	B1503	1.737
High	RVFPYSVFY	48	1	1	O15118		0	1.60736e+08	0	3.552e-05	2.56176	2	1177.6	-0.750921	68.6997	0	C1203	51.85	C1203	0.0153
High	MVVDIVQEL	26	1	1	O00764		0	6.47295e+07	0	0.001037	2.56023	2	1045.56	-0.47585	79.5981	0	C1203	48.15	A6802	0.0082
High	NTCPYVHNI	27	1	1	Q9Y2Y1		0	1.72447e+07	0	0.001273	2.55912	2	1060.49	-0.668574	42.9121	0	C1203	70.37	A6802	0.2006
High	FQYPDTRYL	10	1	1	Q9NY61		0	5.85993e+06	0	0.0002597	2.55728	2	1202.58	-0.235715	56.8854	0	C1203	55.56	C1203	0.0253
High	EVFPDQFIHL	23	1	1	P07686		0	6.13794e+07	0	0.0004929	2.55478	2	1244.63	0.178273	76.7207	0	C1203	40	A6802	0.0767
High	FAYTVKYVL	5	1	1	Q8N2K1		0	1.50842e+06	0	0.002778	2.55255	2	1103.61	-0.22875	62.4822	0	C1203	85.19	C1203	0.0353
High	YAFPKSITV	27	1	1	P53985		0	7.56659e+07	0	0.0005868	2.5492	2	1025.57	-0.301806	57.4903	0	C1203	96.3	C1203	0.0014
High	GAYGQAVRY	3	1	1	Q9UID3		0	723530	0	0.00218	2.5488	2	984.49	0.0745845	33.8657	0	C1203	85.19	C1203	0.0963
High	EAFHGKFYEA	16	1	1	Q13045		0	1.51504e+07	0	0.000724	2.54873	2	1198.55	0.0940668	36.1869	0	C1203	42.86	A6802	0.6977
High	FASHVSPEV	12	1	1	Q9NP61		0	1.12023e+07	0	0.0008832	2.53744	2	972.479	0.00197819	37.5754	0	C1203	85.19	A6802	0.0842
High	RAFPLPMSF	9	1	1	Q9UHJ6		0	3.17709e+06	0	5.128e-05	2.53489	2	1065.56	0.0375482	70.7393	0	C1203	81.48	C1203	0.0024
High	RLFGTTVTF	18	1	1	Q15904		0	5.34255e+07	0	0.0001379	2.53186	2	1041.57	-0.234199	61.1125	0	C1203	44.44	B1503	0.0118
High	LSAPIHTQM	7	1	1	Q8NG31		0	2.27532e+06	0	0.0009504	2.53147	2	997.513	-0.402143	42.3499	0	C1203	70.37	C1203	0.0508
High	YKKQFSQY	2	1	1	P46777		0	2.38248e+06	0	0.002762	2.52801	2	1091.55	-0.430607	25.1057	0	C1203	43.33	B1503	1.1827
High	GKWKQISKY	7	1	1	Q9H8X2		0	1.20223e+06	0	0.00148	2.52789	2	1137.64	-0.119791	26.0071	0	C1203	40.74	B1503	0.1311
High	EAFIAWIHV	10	1	1	P21283		0	3.11452e+06	0	0.0009058	2.51679	2	1085.58	-0.0782184	77.1985	0	C1203	81.48	A6802	0.3114
High	AAIEWIIEH	3	1	1	Q96N28		0	1.56128e+06	0	0.00222	2.51631	2	1081.57	-0.607544	64.2015	0	C1203	55.56	C1203	2.0231
High	ETTSISKITV	4	1	1	P51587		0	2.00757e+06	0	0.002571	2.51617	2	1078.6	-0.0228795	44.0661	0	C1203	40	A6802	0.1046
High	MAAAWPLLL	13	1	1	P15151		0	9.44142e+06	0	0.0004179	2.51346	2	985.554	-0.184392	94.304	0	C1203	85.19	C1203	0.0433
High	RQLEDILSTY	15	1	1	P40222		0	1.27646e+07	0	0.002523	2.51083	2	1237.64	-0.0580032	60.5936	0	C1203	28.57	B1503	0.0124
High	VASDLVMKV	5	1	1	Q9NYU2		0	1.36744e+06	0	0.001513	2.51057	2	961.539	0.00269132	49.3212	0	C1203	88.89	A6802	0.1452
High	KAYGASKTF	3	1	1	P27694		0	609431	0	0.0005631	2.50293	2	972.515	-0.126675	22.3439	0	C1203	81.48	C1203	0.01
High	AAYYHPSYL	10	1	1	Q14687		0	2.97305e+06	0	0.002622	2.50189	2	1084.51	-0.570237	46.7223	0	C1203	85.19	C1203	0.0061
High	ETLFPSKIGV	8	2	2	Q9H8S9;Q7L9L4		0	3.94355e+06	0	0.0001077	2.49745	2	1090.61	-0.0329069	60.8312	0	C1203	45.71	A6802	0.0371
High	FAFPLHVDY	13	1	1	Q8TDY4		0	6.01041e+06	0	0.001536	2.49483	2	1108.55	-0.37647	71.4016	0	C1203	92.59	C1203	0.0261
High	QKFLQGLVY	11	1	1	Q5J8M3		0	2.25104e+07	0	0.002112	2.49402	2	1095.62	-0.727641	60.4203	0	C1203	48.15	B1503	0.0525
High	AKYLDEDTIY	3	1	1	P31153		0	1.46925e+06	0	0.0005093	2.49097	2	1230.59	0.415872	49.7712	0	C1203	34.29	B1503	0.1641
High	KKYGPKGYGY	9	2	2	P21291;Q16527		0	1.14676e+06	0	0.0002648	2.48373	2	1160.61	-0.509018	23.5697	0	C1203	42.86	B1503	0.1239
High	SISDVIAQV	12	1	1	Q9HCJ1		0	1.00341e+07	0	0.001174	2.47922	2	931.509	-0.0904845	67.4299	0	C1203	48.15	A6802	0.01
High	YLYGQTTTY	9	1	1	P11388		0	3.96694e+06	0	0.00194	2.47472	2	1109.51	-0.0190382	50.8503	0	C1203	51.85	B1503	0.0076
High	YAYFNFPEL	7	1	1	Q8IY21		0	1.03288e+06	0	0.002201	2.47113	2	1163.54	0.216515	87.9521	0	C1203	85.19	C1203	0.0076
High	IKKEFDKKY	3	2	2	P63167;Q96FJ2		0	1.10077e+06	0	8.83e-05	2.47021	3	1198.68	0.379624	19.4349	0	C1203	44.44	B1503	0.2653
High	EVVGLIFRL	6	1	1	Q8NBU5		0	3.62151e+06	0	0.00119	2.46865	2	1045.64	-0.186405	77.6542	0	C1203	44.44	A6802	0.0228
High	EVIDFSHGL	26	3	3	Q96GS6;Q5VST6;Q6PCB6		0	89550556	0	0.001729	2.4667	2	1016.5	-0.57384	60.0849	0	C1203	40.74	A6802	0.0026
High	LSLSSEDPVL	7	2	2	Q13507;Q9HCX4		0	9.2363e+06	0	0.002806	2.46597	2	1059.56	0.0481941	73.9659	0	C1203	57.14	C1203	18.2392
High	EIAEAYLGYPV	5	1	1	P08107		0	4.12537e+06	0	1.202e-05	2.46432	2	1224.62	0.358156	73.9509	0		0	A6802	1.2683
High	EVYGSLPAFL	15	1	1	Q01650		0	1.79721e+07	0	0.0001653	2.45449	2	1095.57	-0.0567894	84.2028	0	C1203	40	A6802	0.1394
High	AMNPTNTVF	14	1	1	P11142		0	2.02406e+07	0	0.002891	2.43889	2	994.465	-1.16224	55.4473	0	C1203	44.44	B1503	0.0048
High	GQVTFLHVF	6	1	1	Q9BW60		0	1.89282e+06	0	0.001001	2.43397	2	1047.56	-0.047646	67.3488	0	C1203	33.33	B1503	0.0616
High	IKFFTGDVF	7	1	1	Q9UBE0		0	6.53528e+06	0	0.001669	2.43064	2	1073.57	-0.193236	70.9474	0	C1203	37.04	B1503	0.0667
High	HKIDKSHEF	3	1	1	Q9NWV8		0	398553	0	0.000484	2.43044	2	1140.58	-0.0296845	18.4976	0	C1203	37.04	B1503	0.0234
High	NAFASVILF	16	1	1	P26641		0	1.68851e+07	0	0.001313	2.42701	2	981.54	-0.236942	88.2018	0	C1203	77.78	C1203	0.1134
High	KKFVTQQQY	1	1	1	Q9Y4E5		0	415617	0	0.002749	2.42677	2	1169.63	0.133397	25.8601	0	C1203	40.74	B1503	0.029
High	ETFFGVQWV	1	1	1	P32970		0	1.91065e+06	0	0.0005517	2.4256	2	1112.54	-0.0971436	90.4783	0	C1203	74.07	A6802	0.0235
High	FAWPKILKI	14	2	2	Q9H4G0;O43491		0	6.36134e+06	0	0.0005378	2.41585	2	1115.7	-0.166717	68.4772	0	C1203	85.19	C1203	0.033
High	KQPDNSPEY	6	1	1	Q9NX07		0	953150	0	0.0002193	2.41267	2	1077.48	-0.0877605	23.1562	0	C1203	44.44	B1503	0.0567
High	FKIEPPGLF	8	2	2	Q969P6;P11387		0	2.6497e+06	0	0.0005639	2.4102	2	1047.59	-0.186618	70.1407	0	C1203	40.74	B1503	0.0502
High	AQAASQHVF	4	1	1	Q9NQT4		0	613695	0	0.0003652	2.40995	2	958.474	-0.544537	29.7409	0	C1203	40.74	B1503	0.0041
High	EAIDFIDSI	10	1	1	P28562		0	5.39632e+06	0	0.001802	2.40374	2	1022.5	-0.402533	82.0949	0	C1203	74.07	A6802	0.0194
High	RKPDQVFQSY	9	1	1	Q96K76		0	1.62469e+06	0	0.001695	2.39826	3	1267.64	0.0542274	35.0555	0	C1203	40	B1503	0.2794
High	YTIENPRHF	1	1	1	Q7KZF4		0	929960	0	0.001591	2.39667	2	1176.58	-0.331528	37.262	0	C1203	74.07	C1203	0.0205
High	EISSILQEL	17	2	2	Q96L14;Q5SW79		0	1.28522e+07	0	0.001842	2.39631	2	1031.56	-0.141652	81.0771	0	C1203	48.15	A6802	0.0689
High	GKYGSSLEF	4	1	1	P55212		0	2.49723e+06	0	0.002539	2.39401	2	987.478	-0.210023	45.0559	0	C1203	44.44	B1503	0.008
High	GKEKLPRYY	12	1	1	P62280		0	4.50421e+06	0	4.793e-05	2.39183	2	1153.64	0.167278	27.9874	0	C1203	44.44	B1503	0.9198
High	RQFTSSSSI	3	1	1	Q04695		0	409203	0	0.0009353	2.38195	2	1012.51	0.0747391	30.9651	0	C1203	33.33	B1503	0.0889
High	RQLPGSQRY	5	1	1	Q96BD0		0	1.24875e+06	0	9.371e-05	2.37972	2	1104.59	-0.693298	24.8549	0	C1203	44.44	B1503	0.0018
High	GQFQKIVLY	4	1	1	P53675		0	3.55431e+06	0	0.0004266	2.37871	2	1095.62	-0.727641	55.6171	0	C1203	48.15	B1503	0.0079
High	NTIPFIIRY	12	1	1	Q8N5C6		0	3.53001e+07	0	3.246e-05	2.37551	2	1136.65	-0.21784	68.1616	0	C1203	81.48	C1203	0.1253
High	YSYPELVKM	4	1	1	Q96MH7		0	3.55179e+06	0	0.0007079	2.37505	2	1129.56	-0.197766	58.6775	0	C1203	77.78	C1203	0.0055
High	RKKPPMNSM	3	1	1	Q01844		0	1.42633e+06	0	0.0006127	2.37445	2	1088.57	-0.262125	18.5614	0	C1203	37.04	B1503	0.0375
High	AQVPFEQIL	20	1	1	Q99828		0	5.87642e+07	0	0.001932	2.36765	2	1044.57	-0.151331	77.071	0	C1203	48.15	B1503	0.1391
High	KAFGWPSSL	9	1	1	Q9HAH1		0	5.11215e+06	0	0.0007564	2.36705	2	992.52	-0.219956	59.0569	0	C1203	85.19	C1203	0.0051
High	GQYPTQPTY	27	1	1	Q15038		0	6.01913e+07	0	0.0005009	2.36248	2	1054.48	-0.420294	43.2994	0	C1203	51.85	B1503	0.0016
High	DIFPIVIHV	13	1	1	Q9BXL6		0	9.33026e+06	0	0.003024	2.36038	2	1052.61	-0.581839	83.5384	0	C1203	55.56	A6802	0.0096
High	EIMEIMQNL	3	1	1	Q13352		0	816812	0	0.002123	2.35858	2	1120.54	-0.212501	79.2901	0	C1203	40.74	A6802	0.0201
High	HQITVLHVY	8	1	1	Q9NYP7		0	4.86178e+06	0	0.001319	2.35149	2	1109.61	-0.0597321	43.8381	0	C1203	40.74	B1503	0.0082
High	YKKGKDSLY	10	2	2	P83881;Q969Q0		0	2.95968e+06	0	0.00208	2.34798	2	1101.59	-0.546465	19.6767	0	C1203	44.44	B1503	0.1869
High	DVSNPQTVGV	8	1	1	O60493		0	3.32746e+06	0	0.002451	2.34788	2	1015.51	0.029013	46.3489	0	C1203	28.57	A6802	0.1238
High	YTSGPGSRI	7	1	1	P05787		0	3.24409e+06	0	0.001349	2.34158	2	937.474	0.00126037	27.8313	0	C1203	70.37	A6802	0.0996
High	KALSRLISF	15	1	1	Q8N8L2		0	4.38185e+07	0	0.003004	2.34133	2	1034.63	-0.897009	54.2374	0	C1203	74.07	C1203	0.0962
High	LKFPGLHSF	6	1	1	Q15165		0	5.88954e+06	0	0.001768	2.33361	2	1045.58	-0.970294	55.1901	0	C1203	40.74	B1503	0.0023
High	ETFAFQAEI	16	5	5	Q58FF8;Q58FF7;Q14568;P07900;P08238		0	1.82135e+07	0	0.002409	2.32957	2	1055.5	-0.355641	72.7878	0	C1203	66.67	A6802	0.0102
High	EAADIIQKL	3	1	1	O00471		0	4006007	0	0.001367	2.32875	2	1000.57	-0.265914	52.7452	0	C1203	85.19	A6802	0.0324
High	RQLYLSERY	5	1	1	Q5T953		0	1.6809e+06	0	0.0006192	2.32491	2	1227.65	-0.0606709	36.9465	0	C1203	37.04	B1503	0.033
High	ALMPPFTAF	4	1	1	P51955		0	1.99771e+06	0	0.002087	2.3248	2	994.506	-0.317791	86.6431	0	C1203	40.74	B1503	0.0066
High	FAFPDEFVF	2	2	2	O14908;Q8TF65		0	819797	0	0.0002145	2.32328	2	1118.52	-0.259926	96.0305	0	C1203	85.19	C1203	0.0942
High	SVVELVNKL	10	1	1	Q9BQE5		0	6.82018e+06	0	0.001707	2.32025	2	1000.6	0.280036	58.9369	0	C1203	44.44	A6802	0.0721
High	GKFDWRQQY	13	1	1	Q8N766		0	8.52389e+06	0	0.002962	2.31499	2	1227.59	-0.0566962	40.7337	0	C1203	44.44	B1503	0.0236
High	TTIEAIHGL	15	1	1	Q92905		0	6.3239e+06	0	0.0001793	2.30944	2	954.525	-0.0765577	49.1442	0	C1203	74.07	A6802	0.004
High	MALGHVIVL	8	1	1	Q9NVR2		0	3.2511e+06	0	0.000659	2.30713	2	952.565	-0.153728	64.6862	0	C1203	88.89	C1203	0.0211
High	RQQQSQTAY	4	2	2	Q99613;B5ME19		0	631496	0	0.0006393	2.30248	2	1109.53	0.0572893	18.4478	0	C1203	37.04	B1503	0.0031
High	KKFVETPGQKY	3	1	1	P05455		0	649829	0	0.0008422	2.28037	3	1324.73	0.695272	26.145	0		0	B1503	0.655
High	GKLISVEY	6	1	1	Q8IVG5		0	1.41207e+06	0	0.0004908	2.27438	2	908.509	-0.218797	47.116	0	C1203	36.67	B1503	1.2584
High	KAFLNAIM	5	2	2	Q14839;Q8TDI0		0	4.80068e+06	0	0.002913	2.27264	2	907.507	-0.173843	56.7485	0	C1203	83.33	C1203	2.0118
High	AKLDHVNIVHY	2	1	1	P19525		0	1.16341e+06	0	0.0001163	2.2683	3	1308.71	0.143697	38.012	0		0	B1503	0.8505
High	RAFGIPIRVY	6	1	1	P06493		0	1711535	0	0.001026	2.26614	2	1191.7	-0.193682	56.33	0	C1203	77.14	B1503	0.1646
High	YAFVRPVIL	3	1	1	Q96S16		0	2.04238e+06	0	0.0003895	2.25338	2	1077.65	-0.241294	66.5476	0	C1203	88.89	C1203	0.0064
High	SAMPTVRSF	19	1	1	Q03518		0	2.50831e+07	0	0.0007302	2.24975	2	995.497	-0.4492	46.0019	0	C1203	81.48	C1203	0.0052
High	VKAEIRQQF	5	1	1	P30154		0	1.11444e+06	0	8.783e-05	2.24691	2	1118.63	-0.400593	31.9974	0	C1203	40.74	B1503	0.0242
High	ETYQFSGVYV	8	1	1	P61160		0	6.46375e+06	0	0.0003764	2.2455	2	1192.55	-0.555196	68.902	0	C1203	45.71	A6802	0.0448
High	FAHLPKSTF	4	1	1	P26641		0	1.30795e+06	0	0.001435	2.2242	2	1047.56	-0.280702	41.7217	0	C1203	74.07	C1203	0.0247
High	MSSSVVVRL	4	1	1	A0JNW5		0	1.58501e+06	0	0.000576	2.2223	2	977.545	-0.0971124	48.9013	0	C1203	81.48	A6802	0.1302
High	DTTYINHVV	17	1	1	Q9UBR2		0	2.57038e+07	0	0.001985	2.21926	2	1061.53	-0.162714	46.83	0	C1203	70.37	A6802	0.0533
High	ESSPFVERLL	7	1	1	P14625		0	3.62543e+06	0	0.003094	2.21799	2	1176.63	-0.370058	64.2534	0	C1203	57.14	A6802	1.2953
High	YAKDDPLEF	4	1	1	P06756		0	3.44379e+06	0	0.0009544	2.21588	2	1097.51	-0.176028	52.3011	0	C1203	85.19	C1203	0.028
High	EAIDWLLGL	4	1	1	Q9Y224		0	3.35995e+06	0	0.0011	2.21397	2	1029.56	-0.365665	100.935	0	C1203	81.48	A6802	0.0435
High	KKLPKGTVSF	6	1	1	O75534		0	999570	0	0.002533	2.21128	2	1104.68	-0.0665053	28.6029	0	C1203	34.29	B1503	0.052
High	TKLWIIMEY	2	2	2	Q9Y6E0;O00506		0	702035	0	0.002087	2.20462	2	1196.64	0.130452	74.5505	0	C1203	44.44	B1503	0.4346
High	ETFDFVHNV	10	1	1	Q96E29		0	9.35455e+06	0	0.002139	2.19033	2	1107.51	0.0689979	57.9397	0	C1203	77.78	A6802	0.001
High	RVYPQAVYF	12	1	1	Q9Y4A5		0	3.18569e+07	0	0.00134	2.18486	2	1142.6	-0.142314	54.6285	0	C1203	44.44	C1203	0.0071
High	FQAPRNPTL	12	1	1	Q8IZW8		0	1.39915e+07	0	0.001763	2.18302	2	1043.56	-0.25434	43.2543	0	C1203	55.56	B1503	0.0561
High	SSVPGVRLL	9	1	1	P08670		0	5.5344e+06	0	0.0005375	2.17902	2	927.562	0.00121067	53.2208	0	C1203	81.48	C1203	0.0791
High	LKSVNELIY	7	1	1	P18124		0	1.17705e+07	0	0.000769	2.17893	2	1078.61	-0.241077	53.2843	0	C1203	44.44	B1503	0.4351
High	SKDKRDVYY	8	1	1	Q9UET6		0	583757	0	0.002334	2.07968	2	1173.59	-0.103973	20.1008	0	C1203	40.74	B1503	0.5598
High	KKNKDNVKF	2	1	1	P63173		0	1.02371e+06	0	0.000917	2.07506	2	1120.65	-0.204324	17.3168	0	C1203	33.33	B1503	0.0373
High	FAMPYFIQV	11	1	1	Q00610		0	3.73478e+06	0	0.00213	2.05453	2	1115.56	-0.0784623	90.9223	0	C1203	88.89	C1203	0.0468
High	YLKEFIHIL	7	1	1	Q9NZ32		0	4.08394e+06	0	0.0005224	2.04646	2	1175.68	-0.243999	62.8172	0	C1203	48.15	C1203	0.204
High	EVIGKITAL	9	1	1	O43264		0	7.03096e+06	0	0.000115	2.02484	2	943.582	-0.24635	52.8236	0	C1203	44.44	A6802	0.0198
High	QKYAGKDGY	5	1	1	P31949		0	809212	0	0.0009112	2.00215	2	1029.5	0.0352586	18.7541	0	C1203	40.74	B1503	0.2254
High	FKSNVTKTM	3	1	1	Q9Y255		0	445911	0	0.001288	1.99498	2	1055.55	-1.13162	25.1267	0	C1203	44.44	B1503	0.1681
High	RKLPEKTQTF	2	1	1	Q96SY0		0	1.04421e+06	0	0.001639	1.98763	3	1247.71	0.118843	25.0062	0	C1203	34.29	B1503	0.1149
High	HTVWIPWNV	5	1	1	Q9P273		0	2.05487e+07	0	0.000243	1.89478	2	1151.6	-0.127125	73.0058	0	C1203	70.37	A6802	0.0317
High	RLVELLVSY	7	1	1	P51572		0	4.41972e+06	0	0.002342	1.8712	2	1091.65	-0.0363468	66.4002	0	C1203	44.44	B1503	0.1001
High	NIPSFIVRL	2	1	1	P46781		0	4.48044e+06	0	0.002527	1.84855	2	1058.64	-0.300127	71.4402	0	C1203	48.15	A6802	0.1038
High	KHLDKFSSY	5	1	1	Q8N884		0	602904	0	0.0004105	1.82014	2	1124.57	-0.414072	26.2052	0	C1203	40.74	B1503	0.0607
High	DIATILSKV	10	1	1	Q8NG31		0	5.14867e+06	0	0.002345	1.81349	2	959.577	-0.471572	71.3963	0	C1203	40.74	A6802	0.0368
High	FFPDFIWTV	3	3	3	Q96PP9;Q8N8V2;Q6ZN66		0	2.56218e+06	0	6.398e-05	1.80993	2	1171.58	-0.198408	103.048	0	C1203	51.85	A6802	0.5738
High	VKIQKHVTF	5	1	1	P23381		0	1.63173e+06	0	0.002701	1.71971	2	1099.66	-0.00205148	29.0366	0	C1203	40.74	B1503	0.0184
High	KAFQKIVVL	34	2	2	Q7L1Q6;Q9Y6E2		0	3.16893e+08	0.001	0.004203	3.1971	2	1045.68	-0.656265	45.1816	0	C1203	88.89	C1203	0.0077
High	GKFQGLIEKF	5	1	1	P30307		0	1.8839e+06	0.001	0.004941	3.02675	2	1166.66	-0.291054	51.5779	0	C1203	42.86	B1503	0.4515
High	GQRKPATSY	12	1	1	P46779		0	4.00632e+07	0.001	0.004788	2.97439	2	1007.53	-0.543459	17.7322	0	C1203	37.04	B1503	0.0046
High	GKAPLNVQF	6	1	1	O75369		0	3.98291e+06	0.001	0.004385	2.97287	2	973.546	-0.223942	49.7727	0	C1203	44.44	B1503	0.0364
High	YTFFTPNNI	8	1	1	P17844		0	3.47581e+07	0.001	0.005593	2.95895	2	1116.54	-0.221309	73.6874	0	C1203	70.37	A6802	0.0343
High	RLYFSQQTY	5	1	1	P33897		0	1.10446e+07	0.001	0.005296	2.95674	2	1205.59	-1.26901	46.6294	0	C1203	44.44	B1503	0.0148
High	IKPDGLLEF	7	1	1	Q15345		0	3.59702e+06	0.001	0.005499	2.87722	2	1031.58	0.0841494	64.5424	0	C1203	40.74	B1503	0.2297
High	YKIDPSTL	7	1	1	O15294		0	1.9826e+06	0.001	0.004557	2.81811	2	936.503	-0.382063	47.9511	0	C1203	43.33	B1503	1.6411
High	RQIVSGLKY	2	1	1	Q9NYY3		0	2.03381e+06	0.001	0.004591	2.79513	2	1063.63	-0.448927	36.6124	0	C1203	40.74	B1503	0.0041
High	GKWPSSQQY	8	1	1	Q8TD26		0	701051	0.001	0.004256	2.77752	2	1080.51	0.000515092	34.1774	0	C1203	44.44	B1503	0.0232
High	GKYFSLEGY	1	1	1	E7ETH6		0	955643	0.001	0.004006	2.75166	2	1063.51	-0.40479	55.406	0	C1203	40.74	B1503	0.2709
High	GKNPDEVSY	6	1	1	O95391		0	2.0502e+06	0.001	0.005865	2.72901	2	1008.46	-0.360029	28.1581	0	C1203	48.15	B1503	0.077
High	LAKAWPTVL	1	1	1	P31040		0	4.86703e+06	0.001	0.004535	2.70633	2	998.603	-0.306786	58.2397	0	C1203	81.48	C1203	0.0648
High	EVYAGNFVEV	3	1	1	Q9UBS4		0	2.27291e+06	0.001	0.003581	2.68561	2	1126.54	-0.117053	66.6241	0	C1203	31.43	A6802	0.0196
High	MAVEFLHEL	2	1	1	Q9NR45		0	1.28969e+06	0.001	0.005653	2.66704	2	1088.55	0.720581	67.1804	0	C1203	81.48	C1203	0.0266
High	RSFPGFQAF	9	1	1	Q01780		0	3.39039e+06	0.001	0.004839	2.6594	2	1056.53	-0.481707	60.0335	0	C1203	70.37	B1503	0.0055
High	EVWGEEFEKL	2	1	1	P23921		0	2.29034e+06	0.001	0.003519	2.6585	2	1265.61	0.381619	64.6373	0	C1203	31.43	A6802	1.1918
High	EVFEKATFI	14	1	1	P19338		0	1.16774e+07	0.001	0.003565	2.6582	2	1083.57	-0.291958	56.783	0	C1203	37.04	A6802	0.0158
High	KAIATTVTY	8	1	1	O43808		0	2.11019e+06	0.001	0.003275	2.65626	2	967.546	-0.269175	36.9328	0	C1203	81.48	B1503	0.0276
High	STVEVIFHV	9	2	2	Q6GYQ0;Q2PPJ7		0	3.32252e+06	0.001	0.004937	2.65603	2	1030.56	-0.47478	62.7672	0	C1203	74.07	A6802	0.0036
High	LKWSTAVEF	5	1	1	P08174		0	1.59128e+06	0.001	0.00549	2.64839	2	1080.57	-0.146289	61.919	0	C1203	40.74	B1503	0.1199
High	FFIAGRYEF	3	1	1	P13807		0	3.23496e+06	0.001	0.003721	2.62701	2	1149.57	0.424928	66.5262	0	C1203	37.04	C1203	0.8403
High	GQIPQILYY	1	1	1	O75592		0	1.26453e+06	0.001	0.005487	2.62005	2	1094.59	-0.139848	74.7208	0	C1203	51.85	B1503	0.0067
High	SKASQFTGY	2	1	1	O94966		0	521699	0.001	0.004952	2.618	2	988.473	-0.148815	31.9158	0	C1203	44.44	B1503	0.0836
High	DVSNVIEKV	20	1	1	O94955		0	3.34357e+07	0.001	0.004472	2.61353	2	1002.55	-0.459952	50.0668	0	C1203	44.44	A6802	0.0314
High	GKYASIILF	27	1	1	Q8TCB0		0	7.35636e+07	0.001	0.003228	2.5957	2	1011.59	-0.59584	66.9839	0	C1203	40.74	B1503	0.034
High	KLFPGSPAIY	11	7	7	P49792;P0DJD0;P0DJD1;A6NKT7;Q7Z3J3;Q99666;O14715		0	7.56032e+06	0.001	0.005842	2.59465	2	1092.61	-0.817809	57.7597	0	C1203	51.43	B1503	0.1045
High	SIAEVVHQL	4	1	1	O14976		0	2.08373e+06	0.001	0.005059	2.57937	2	995.552	-0.257032	53.5954	0	C1203	48.15	A6802	0.0145
High	FKGELIHVF	7	1	1	Q9H0P0		0	3.42605e+06	0.001	0.003986	2.5721	2	1089.61	-0.235848	55.2606	0	C1203	44.44	B1503	0.1705
High	YVTSILQSL	6	1	1	Q69YN4		0	2.22986e+06	0.001	0.005115	2.56218	2	1023.57	-0.0412447	77.6341	0	C1203	44.44	C1203	0.0597
High	GQNKKVMIY	13	2	2	Q14839;Q8TDI0		0	9.07346e+06	0.001	0.005622	2.56105	2	1080.59	0.0115045	27.4226	0	C1203	40.74	B1503	0.0144
High	KNFPWQVFF	8	1	1	P09871		0	4.67308e+06	0.001	0.003886	2.55674	2	1212.62	0.0606012	82.5844	0	C1203	44.44	B1503	0.4137
High	SVFGFSFKL	10	1	1	P26639		0	2.93195e+06	0.001	0.005087	2.55364	2	1031.56	-0.249689	77.6916	0	C1203	44.44	A6802	0.0365
High	ELFTGFIKV	8	1	1	Q86TM6		0	1.33926e+07	0.001	0.003494	2.55258	2	1053.6	-0.128494	72.5364	0	C1203	44.44	A6802	0.114
High	TVVEIILQA	8	1	1	P38935		0	3.30545e+06	0.001	0.003916	2.53893	2	985.592	-0.48449	77.4648	0	C1203	11.11	A6802	0.0406
High	ETFSSYISV	1	1	1	A5PLN9		0	2.55703e+06	0.001	0.003241	2.53118	2	1032.49	-0.108913	67.8337	0	C1203	77.78	A6802	0.0049
High	EVLDILTRL	5	1	1	O75955		0	7.818e+06	0.001	0.005234	2.52251	2	1071.64	-0.090171	77.495	0	C1203	40.74	A6802	0.0191
High	STVSIQIKL	6	1	1	O60502		0	4.72007e+06	0.001	0.004628	2.47436	2	988.604	0.108334	58.3048	0	C1203	74.07	A6802	0.0859
High	VKFPSIMVY	2	1	1	Q68CR1		0	972941	0.001	0.004354	2.46703	2	1083.59	-0.0142665	67.4002	0	C1203	59.26	B1503	0.0029
High	YAFLHRTL	6	2	2	Q9UH17;Q8IUX4		0	2.07693e+06	0.001	0.004004	2.46104	2	1020.56	-0.362459	42.6201	0	C1203	90	C1203	0.2862
High	AASSIQRVL	3	2	2	Q5BKT4;Q5I7T1		0	1.6833e+06	0.001	0.00589	2.45801	2	944.552	-0.501633	39.3542	0	C1203	92.59	C1203	0.2688
High	AKIERFEFY	7	1	1	A2VDF0		0	1.65837e+06	0.001	0.005311	2.45313	2	1202.62	-0.161683	48.1915	0	C1203	44.44	B1503	0.0597
High	EVISKLYAV	28	1	1	P50990		0	1.50156e+08	0.001	0.004184	2.45178	2	1021.59	-0.278393	53.1166	0	C1203	40.74	A6802	0.0052
High	GQFGTINNF	1	1	1	Q14457		0	1.64016e+06	0.001	0.003767	2.44461	2	997.474	0.358297	60.0194	0	C1203	40.74	B1503	0.0065
High	KKKSPASTF	1	1	1	Q86U70		0	231492	0.001	0.005905	2.43075	2	993.573	0.123066	17.9717	0	C1203	37.04	B1503	0.0122
High	NSYVSPRIL	9	1	1	Q9H992		0	4.68641e+06	0.001	0.004095	2.42216	2	1048.58	-0.758086	48.598	0	C1203	77.78	C1203	0.2514
High	VKVPTTLAEY	4	2	2	P49427;Q712K3		0	1.06409e+06	0.001	0.003252	2.41601	2	1120.62	-0.405178	51.9421	0	C1203	34.29	B1503	0.232
High	RKIGDTSVSY	7	1	1	P20700		0	3.40817e+06	0.001	0.004352	2.39303	2	1125.59	-0.442641	31.2302	0	C1203	37.14	B1503	0.0209
High	VMAPRTLLL	27	19	19	P30443;P04439;P13746;P30512;P16188;P16189;P10314;P16190;P30455;P30459;Q07000;P04222;P30504;Q9TNN7;Q29963;P30505;P30508;P30510;Q29960		0	5.55774e+07	0.001	0.004628	2.38242	2	1013.62	-0.540906	58.6123	0	C1203	55.56	C1203	0.2043
High	RQFMAETQF	9	1	1	Q14444		0	3379802	0.001	0.00587	2.38197	2	1157.54	-0.458298	48.1866	0	C1203	33.33	B1503	0.0046
High	KSFEGLFYF	7	1	1	Q00610		0	4.66986e+06	0.001	0.004402	2.37406	2	1137.56	0.223176	75.408	0	C1203	66.67	C1203	0.086
High	AKAGITTTL	3	1	1	P33992		0	849042	0.001	0.004971	2.32773	2	875.52	0.626982	35.3531	0	C1203	51.85	B1503	0.1159
High	SKKPESTSF	6	1	1	Q9BT25		0	1.4056e+06	0.001	0.005448	2.31092	2	1010.51	-0.69895	19.4918	0	C1203	37.04	B1503	0.0119
High	QSLIPFVQL	1	1	1	P54278		0	8.62709e+06	0.001	0.005628	2.31023	2	1044.61	0.313187	87.6944	0	C1203	70.37	C1203	1.4238
High	GKYFDKASY	3	1	1	P29401		0	408717	0.001	0.003323	2.30657	2	1078.52	-0.0927469	31.5119	0	C1203	40.74	B1503	0.0216
High	RQFPTAFEF	12	1	1	Q13614		0	8.9001e+06	0.001	0.005328	2.28355	2	1142.56	-0.798191	63.4071	0	C1203	44.44	B1503	0.0057
High	FAGPCKVI	11	1	1	P78527		0	5.89991e+06	0.001	0.003894	2.27286	2	834.454	-0.14637	46.1248	0	C1203	83.33	C1203	13.7903
High	MASALVHIL	13	1	1	Q5VWQ8		0	5.75334e+06	0.001	0.005898	2.26502	2	954.544	-0.357756	61.035	0	C1203	81.48	C1203	0.1674
High	ETFNDFVRL	8	1	1	O43913		0	5.6441e+06	0.001	0.004021	2.25564	2	1140.57	-0.0388633	66.0452	0	C1203	74.07	A6802	0.019
High	HTFWGVVFF	7	1	1	Q96BI3		0	1.66506e+07	0.001	0.004686	2.21889	2	1139.57	-0.0113719	86.712	0	C1203	70.37	C1203	0.211
High	TKFPAEQYY	2	1	1	Q15631		0	851949	0.001	0.004248	2.21699	2	1146.55	-0.0566154	46.1464	0	C1203	48.15	B1503	0.0348
High	TASPVIKAV	2	1	1	Q8WU10		0	1.45052e+07	0.001	0.005701	2.21332	2	885.541	0.0819921	36.9728	0	C1203	92.59	A6802	0.084
High	KAYGKAKSI	2	2	2	Q99613;B5ME19		0	176052	0.001	0.003396	2.21131	2	965.578	-0.393638	17.3309	0	C1203	77.78	C1203	0.0613
High	RQYPEVIKY	5	1	1	Q9UIF8		0	2.70441e+06	0.001	0.005431	2.18452	2	1195.65	-0.400893	39.214	0	C1203	55.56	B1503	0.0008
High	TTTEITHHGT	4	1	1	P15924		0	1.42716e+06	0.001	0.003703	2.1778	2	1097.52	-0.498629	18.1634	0	C1203	20	A6802	1.9445
High	AKFSLPVSL	3	1	1	Q12980		0	1.36469e+07	0.001	0.004326	2.17329	2	961.572	-0.166912	66.3933	0	C1203	55.56	B1503	0.0876
High	FSFPSIFIY	10	1	1	O43913		0	9.84063e+06	0.001	0.00429	2.15342	2	1120.57	0.169112	100.018	0	C1203	85.19	C1203	0.0236
High	HAAHIISEL	7	1	1	Q96I24		0	2.90989e+06	0.001	0.005312	2.14609	2	990.537	-0.0733012	37.6287	0	C1203	85.19	C1203	0.029
High	RQINWTVLY	13	1	1	P83731		0	4.83379e+07	0.001	0.003474	2.11752	2	1192.65	-0.584629	63.4213	0	C1203	40.74	B1503	0.0094
High	EVAKVIVSM	8	1	1	Q99996		0	2.78839e+06	0.001	0.005819	2.11229	2	975.554	-0.273232	48.9426	0	C1203	40.74	A6802	0.0296
High	TAYPQVVVV	17	1	1	Q9ULI2		0	2.63116e+07	0.001	0.00341	2.10715	2	975.551	-0.416782	63.9247	0	C1203	96.3	C1203	0.008
High	ISAPLVKTL	8	1	1	P30305		0	2.44606e+06	0.001	0.005902	2.10464	2	941.603	-0.093912	52.3663	0	C1203	88.89	C1203	0.0362
High	GKGFTRISY	2	1	1	Q9BRR0		0	712552	0.001	0.004786	2.03435	2	1028.55	-0.332261	33.4095	0	C1203	40.74	B1503	0.2148
High	MTADSRSQV	7	1	1	P60900		0	1.21955e+06	0.001	0.004516	2.01461	2	994.462	-0.495488	21.8171	0	C1203	74.07	A6802	0.0169
High	THRSGQGAF	1	1	1	P36578		0	157580	0.001	0.005352	1.98625	2	960.464	-0.184491	17.9212	0	C1203	33.33	B1503	0.6119
High	SKYFERHGY	1	1	1	O95786		0	1.78041e+06	0.001	0.003833	1.92285	2	1186.56	-0.196364	25.4128	0	C1203	40.74	B1503	0.0436
High	HTVGFILQL	13	1	1	Q5SRE5		0	4.43519e+07	0.001	0.004307	1.89789	2	1027.59	-0.334814	71.1003	0	C1203	77.78	A6802	0.0263
High	YKEKTGKEY	1	1	1	P07814		0	178791	0.001	0.004697	1.62844	2	1145.58	0.0406196	16.9829	0	C1203	48.15	B1503	0.289
High	KAFPKAYLL	20	1	1	Q66K89		0	1.04853e+07	0.002	0.01072	3.04525	2	1050.63	-0.678227	46.4901	0	C1203	85.19	C1203	0.0085
High	VTTDIQVKV	13	1	1	O00267		0	5.96909e+06	0.002	0.007243	2.98747	2	1002.58	-0.341218	45.5349	0	C1203	77.78	A6802	0.0369
High	YKMPGGLAF	4	1	1	Q99853		0	1.04225e+06	0.002	0.008187	2.95998	2	983.502	-0.0738652	60.3274	0	C1203	44.44	B1503	0.0028
High	MKFPTQSSF	1	1	1	Q9HCD6		0	2.00571e+06	0.002	0.006814	2.85519	2	1072.51	-0.00942413	50.6483	0	C1203	40.74	B1503	0.0041
High	SKLPSSIEY	5	1	1	Q15386		0	2.78215e+06	0.002	0.00943	2.84822	2	1023.54	-0.515323	43.7274	0	C1203	51.85	B1503	0.0129
High	LVANIIQNV	2	1	1	O94915		0	2.71385e+06	0.002	0.006715	2.82862	2	983.588	-0.273423	66.4363	0	C1203	44.44	A6802	0.0264
High	AQIKFLNTY	2	1	1	Q8ND90		0	2.74638e+06	0.002	0.006171	2.81636	2	1097.6	-0.181139	53.9441	0	C1203	44.44	B1503	0.0029
High	TTFDKEFLL	10	1	1	O60306		0	5.28336e+06	0.002	0.006129	2.81561	2	1113.58	-0.230104	65.2847	0	C1203	74.07	A6802	0.0214
High	KTPDFILQV	14	1	1	Q9Y2V0		0	1.3714e+07	0.002	0.007609	2.80218	2	1060.6	-0.311282	63.5441	0	C1203	77.78	A6802	0.1542
High	KGFPHVIYA	8	1	1	Q13485		0	6.52698e+06	0.002	0.0108	2.80188	2	1031.57	-0.121203	42.1762	0	C1203	18.52	C1203	0.7882
High	DTTKWEWLV	7	1	1	Q9BWJ5		0	4.44076e+06	0.002	0.00896	2.75726	2	1177.59	0.157573	75.422	0	C1203	66.67	A6802	0.8805
High	GKSTSIQSF	5	1	1	P13797		0	1.2982e+06	0.002	0.009368	2.75564	2	954.489	-0.0628916	32.281	0	C1203	37.04	B1503	0.0291
High	YAIDNPLHY	1	1	1	A5YKK6		0	2.12614e+06	0.002	0.007364	2.74636	2	1105.53	-1.43878	55.5349	0	C1203	88.89	C1203	0.0069
High	QAIDLVYIDF	16	1	1	Q8N0X4		0	1.79357e+07	0.002	0.007444	2.74414	2	1196.62	-2.66297	69.8011	0	C1203	62.86	C1203	5.2821
High	DTFYVQVLV	10	1	1	Q5BJD5		0	6.46684e+06	0.002	0.007087	2.71283	2	1083.57	-0.273501	86.7017	0	C1203	74.07	A6802	0.0353
High	KKLSSPSNY	1	1	1	Q13325		0	440277	0.002	0.006327	2.68465	2	1023.55	-0.157073	20.9173	0	C1203	44.44	B1503	0.0581
High	AQHLTVSGF	3	1	1	Q96GX5		0	1.10558e+06	0.002	0.0113	2.68014	2	959.494	-0.0499226	44.2024	0	C1203	37.04	B1503	0.0138
High	AKTEVSLTL	1	1	1	P46940		0	716428	0.002	0.006167	2.67428	2	961.556	-0.419557	48.2836	0	C1203	51.85	B1503	0.3122
High	SVFTFVAEV	7	1	1	Q7Z429		0	2.47283e+06	0.002	0.006513	2.66519	2	998.519	-0.281149	82.3155	0	C1203	48.15	A6802	0.0314
High	FLIDHAWTC	13	1	1	Q14166		0	5.95164e+06	0.002	0.009371	2.64664	2	1105.51	-0.0868075	66.8713	0	C1203	11.11	A6802	1.9509
High	KQYKVVVY	1	1	1	P08754		0	1.84977e+06	0.002	0.01034	2.64526	2	1026.6	-0.424101	32.9157	0	C1203	30	B1503	0.018
High	GKSSVIQVF	10	1	1	Q8WVC6		0	4.38868e+06	0.002	0.008461	2.62889	2	964.546	-0.443042	49.6904	0	C1203	44.44	B1503	0.0291
High	EIIDFFLGA	6	1	1	P15880		0	1.66074e+06	0.002	0.006494	2.61783	2	1024.53	-0.308172	96.1114	0	C1203	7.41	A6802	0.047
High	FASTILHLV	20	1	1	P61803		0	1.16451e+07	0.002	0.009017	2.57811	2	1000.58	-0.0641326	66.693	0	C1203	81.48	A6802	0.045
High	TVADVVLWSV	2	1	1	Q13155		0	2.44207e+06	0.002	0.008164	2.57652	2	1088.6	-0.234273	84.8547	0	C1203	31.43	A6802	0.0313
High	ETAAIFHYL	4	1	1	Q13535		0	1.54123e+06	0.002	0.008495	2.55657	2	1064.54	-0.656084	65.2698	0	C1203	70.37	A6802	0.0029
High	KAFSRPWLL	6	5	5	Q9BWW7;Q9NQ03;O95863;O43623;Q3KNW1		0	5.68813e+06	0.002	0.007705	2.54068	2	1117.65	-0.283195	52.393	0	C1203	85.19	C1203	0.0406
High	FPMEIRQYL	7	1	1	P42224		0	2.68737e+06	0.002	0.006327	2.53535	2	1196.61	0.0313792	67.9565	0	C1203	44.44	C1203	0.3313
High	AKHTNFVEF	1	1	1	P53680		0	4.28188e+06	0.002	0.0105	2.52139	2	1092.55	-1.69654	38.5803	0	C1203	40.74	B1503	0.0305
High	YGMPRQIL	7	1	1	P37802		0	2.91193e+06	0.002	0.01014	2.50807	2	977.524	-0.137215	50.6037	0	C1203	46.67	C1203	1.7406
High	STIGIHPVC	17	1	1	Q16881		0	1.94988e+07	0.002	0.01018	2.50004	2	926.476	-0.223872	44.5348	0	C1203	37.04	A6802	1.7333
High	GVVDIFQTV	22	2	2	P23468;Q13332		0	2.27899e+07	0.002	0.009999	2.49161	2	977.53	-0.0739968	78.6643	0	C1203	44.44	A6802	0.0738
High	EVFAWNNEV	5	1	1	P49419		0	2.43183e+06	0.002	0.007619	2.4914	2	1107.51	0.280409	68.5016	0	C1203	44.44	A6802	0.0077
High	FKSPAASSF	1	1	1	O15504		0	837968	0.002	0.006851	2.48528	2	941.473	-0.18006	39.9381	0	C1203	44.44	B1503	0.0106
High	NVTWVIVNL	3	1	1	O00505		0	1.12357e+06	0.002	0.008782	2.4843	2	1057.6	-0.393348	87.3566	0	C1203	44.44	A6802	0.1161
High	EAVSFQHFI	7	1	1	Q99598		0	2.40143e+06	0.002	0.00681	2.47177	2	1077.54	0.125585	61.1174	0	C1203	70.37	A6802	0.0811
High	EVFGHAIKA	3	1	1	P54136		0	4.03317e+06	0.002	0.007291	2.46199	2	971.531	-0.13585	33.8517	0	C1203	11.11	A6802	0.0322
High	MSVHLPFAV	1	1	1	Q9NVA2		0	635479	0.002	0.008416	2.45578	2	1000.53	-0.0723154	70.053	0	C1203	70.37	A6802	0.1714
High	RKVPDNQQF	2	1	1	Q9BX10		0	783764	0.002	0.007479	2.45292	2	1131.59	0.0375318	24.8597	0	C1203	37.04	B1503	0.0189
High	SVTQIYHAV	5	1	1	P04844		0	1.49124e+06	0.002	0.01047	2.44426	2	1017.54	-0.0273045	42.484	0	C1203	37.04	A6802	0.0354
High	TTVDINTQV	3	1	1	Q14676		0	3.02902e+06	0.002	0.007161	2.4351	2	990.51	0.050686	49.4937	0	C1203	70.37	A6802	0.0027
High	SKMGKQLTY	6	1	1	O00115		0	650273	0.002	0.0104	2.42746	2	1055.56	-0.312623	26.4801	0	C1203	48.15	B1503	0.0094
High	GQLPGLHEY	10	1	1	Q8TAT6		0	4.90486e+06	0.002	0.00993	2.40397	2	1013.51	0.0120539	45.1525	0	C1203	48.15	B1503	0.0052
High	SAYARLIDY	9	1	1	P34897		0	5.91357e+06	0.002	0.007271	2.39588	2	1071.55	-0.0361172	52.2323	0	C1203	81.48	C1203	0.0352
High	LVASVRVPA	12	1	1	P42126		0	3.95009e+06	0.002	0.007327	2.38654	2	911.567	-0.0921426	43.3135	0	C1203	11.11	A6802	0.6912
High	SKLFSSVTF	4	1	1	Q9HAV4		0	1.15694e+06	0.002	0.01086	2.38492	2	1015.55	0.214507	59.2441	0	C1203	37.04	B1503	0.0662
High	SIIGRLLEV	8	1	1	P62136		0	2.38727e+06	0.002	0.01043	2.37748	2	999.619	-0.512236	70.9924	0	C1203	48.15	A6802	0.122
High	VKIAGGTSL	1	1	1	Q9H6T0		0	236718	0.002	0.007711	2.34597	2	845.509	0.289385	37.5026	0	C1203	40.74	B1503	0.0432
High	SKLGPGEKY	8	2	2	P53805;Q9UKA8		0	1.5065e+06	0.002	0.009314	2.32571	2	978.525	-0.261804	23.3145	0	C1203	40.74	B1503	0.1059
High	DTFSVQVLV	11	1	1	Q96L33		0	1.28035e+07	0.002	0.01027	2.31127	2	1007.54	-0.375596	81.5929	0	C1203	77.78	A6802	0.0147
High	EQYESFVKF	8	1	1	Q9H9L7		0	3.71603e+06	0.002	0.00864	2.30798	2	1176.56	0.18643	59.0075	0	C1203	40.74	B1503	0.0121
High	HQFLQNEY	12	1	1	Q16531		0	4.90254e+06	0.002	0.007634	2.30601	2	1078.5	-0.193403	40.3178	0	C1203	43.33	B1503	0.1513
High	VTFSGIHLL	4	1	1	Q8N3Z3		0	1.73902e+06	0.002	0.009498	2.29987	2	986.567	-0.287168	67.933	0	C1203	81.48	C1203	0.0373
High	QVFEGHTHYV	5	1	1	P35606		0	1.51747e+06	0.002	0.008565	2.27479	2	1216.57	0.251033	33.8174	0	C1203	37.14	A6802	0.0215
High	IKDNVVIVY	11	1	1	Q9Y2T2		0	9.84725e+06	0.002	0.007715	2.26583	2	1062.62	-0.554561	51.4783	0	C1203	48.15	B1503	0.0687
High	RKVYNISEF	7	1	1	O60427		0	4.62711e+06	0.002	0.01085	2.26101	2	1155.62	0.0423627	40.2028	0	C1203	37.04	B1503	0.0143
High	LSADIFQQV	1	1	1	O94916		0	3.10598e+06	0.002	0.008078	2.25556	2	1020.54	-0.0224971	71.3667	0	C1203	74.07	A6802	0.0684
High	ETFNTPAMYV	11	7	7	Q9BYX7;P60709;P63261;Q6S8J3;A5A3E0;P0CG38;P0CG39		0	3.23876e+07	0.002	0.01067	2.23376	2	1172.53	0.366204	67.33	0	C1203	48.57	A6802	0.0227
High	GKFTEGNITY	5	1	1	Q7Z2W4		0	1.57955e+06	0.002	0.01074	2.1834	2	1129.55	-0.139531	43.1166	0	C1203	37.14	B1503	0.0356
High	RQLPAMTAL	14	1	1	Q13045		0	9.26047e+06	0.002	0.008726	2.17072	2	1000.56	-0.21567	49.3705	0	C1203	44.44	B1503	0.0154
High	QVCAIIERV	12	2	2	Q99613;B5ME19		0	5.38855e+07	0.002	0.01051	2.15713	2	1030.57	-0.210281	51.5939	0	C1203	40.74	A6802	0.5371
High	AKLIAVEIY	4	1	1	Q14008		0	1.71145e+06	0.002	0.006953	2.13745	2	1019.61	-0.386933	59.9102	0	C1203	44.44	B1503	0.1481
High	EIFADPRTV	4	1	1	Q92871		0	2.88897e+06	0.002	0.008113	2.13019	2	1047.55	-0.182113	49.2091	0	C1203	51.85	A6802	0.1054
High	SHYPFFSTF	2	1	1	Q8WXG6		0	2.69088e+06	0.002	0.01123	2.12671	2	1132.51	0.190784	67.4824	0	C1203	44.44	B1503	0.0742
High	SKLQNNNVY	2	1	1	P63010		0	842521	0.002	0.009296	2.12612	2	1079.55	-6.33945e-05	27.5048	0	C1203	40.74	B1503	0.0398
High	RSTKTGTAY	4	1	1	P17844		0	2.46278e+06	0.002	0.01105	2.1234	2	984.511	-0.309412	17.1601	0	C1203	66.67	B1503	0.2802
High	IAFSRPVKY	1	1	1	Q99759		0	571344	0.002	0.01105	2.11782	2	1080.62	-0.826449	38.9698	0	C1203	88.89	C1203	0.008
High	GKVRAVIGSTY	1	1	1	Q14764		0	445374	0.002	0.008687	2.10443	2	1150.66	-0.252836	33.7751	0		0	B1503	1.7533
High	MQYPGRSLVF	4	1	1	Q9GZR7		0	2.20892e+06	0.002	0.008604	2.07205	2	1197.61	0.0223834	58.1003	0	C1203	48.57	B1503	0.0063
High	ALFRTIITY	4	2	2	P29992;P50148		0	4.49312e+06	0.002	0.006192	2.05454	2	1097.64	-0.0818077	64.9137	0	C1203	55.56	B1503	0.047
High	HAFDGRPSVA	3	1	1	Q17R31		0	1.07689e+06	0.002	0.00962	2.02561	2	1056.52	-0.605124	29.0347	0	C1203	60	A6802	1.5652
High	ETYPDPVRV	25	1	1	P49588		0	6.05872e+07	0.002	0.008667	2.01984	2	1075.54	-0.429426	46.5469	0	C1203	85.19	A6802	0.0048
High	RQLLYITAF	4	2	2	O95298;E9PQ53		0	3.03182e+06	0.002	0.01034	2.00816	2	1124.65	0.105458	68.0407	0	C1203	33.33	B1503	0.0217
High	MVAPVWYLV	11	1	1	Q96HY6		0	2.17392e+06	0.002	0.01098	1.9831	2	1077.58	-0.183417	92.7885	0	C1203	48.15	A6802	0.012
High	NVVDVFHAV	3	1	1	Q15262		0	5.35228e+06	0.002	0.007182	1.94862	2	999.526	-0.169016	60.019	0	C1203	40.74	A6802	0.0022
High	GQHSHVVRY	1	1	1	P30291		0	194185	0.002	0.01039	1.93383	2	1082.55	0.20381	18.5409	0	C1203	48.15	B1503	0.0049
High	FAIPLIEKL	3	1	1	Q9NR30		0	3.04387e+06	0.002	0.006429	1.91633	2	1043.65	-0.283139	77.2058	0	C1203	88.89	C1203	0.0276
High	KKIDRHMYH	3	1	1	P84098		0	488939	0.002	0.006934	1.81131	3	1227.64	0.160051	17.3815	0	C1203	3.7	B1503	1.8626
High	RKNPVQEQTY	3	1	1	Q8N9N2		0	308276	0.002	0.006366	1.80575	2	1262.65	0.321721	23.8147	0	C1203	34.29	B1503	0.0872
High	KKHEDVKQY	1	1	1	Q9BZD4		0	69978.7	0.002	0.009751	1.63353	2	1174.62	-0.020211	16.6294	0	C1203	48.15	B1503	0.0322
High	YFVPFIIIm	1	1	1	P35670	M9(Oxidation)	0	473229	0.002	0.007142	1.46397	2	1158.63	0.0538167	102.981	0	C1203	48.15	C1203	0.8003
High	RQYDKFLTHF	1	1	1	Q7Z6M2		0	1.47748e+06	0.003	0.01176	3.05818	3	1354.69	-0.3158	43.8149	0	C1203	37.14	B1503	0.0118
High	AKQRLQQLF	7	1	1	Q9P0U1		0	5.17776e+06	0.003	0.0153	2.75876	2	1131.66	-0.300296	38.709	0	C1203	33.33	B1503	0.2919
High	THLKPGTLY	10	1	1	Q53EP0		0	7.47519e+06	0.003	0.01431	2.5785	2	1029.57	-0.573196	32.7553	0	C1203	37.04	B1503	0.1918
High	EVYEKPVQV	4	1	1	Q9Y508		0	3.68884e+06	0.003	0.01263	2.5402	2	1090.58	-0.235639	39.0013	0	C1203	51.85	A6802	0.0058
High	FLADIVQKL	1	1	1	Q9NZJ4		0	1.09399e+06	0.003	0.01396	2.53331	2	1046.62	-0.420651	68.7655	0	C1203	51.85	C1203	0.0596
High	SQLPKLLVY	6	1	1	P11117		0	2.57262e+06	0.003	0.01209	2.53105	2	1060.64	-0.649989	62.4606	0	C1203	51.85	B1503	0.0043
High	VmAPRTLVL	38	9	9	P01892;P30447;P05534;P18462;P30450;P30456;P30457;P01891;P10316	M2(Oxidation)	0	3.65094e+07	0.003	0.0127	2.52367	2	1015.6	0.224727	50.8857	0	C1203	59.26	C1203	0.129
High	GQFSKPFSF	3	1	1	P35658		0	1.10518e+06	0.003	0.01336	2.51802	2	1044.51	-0.127517	56.0695	0	C1203	40.74	B1503	0.0042
High	NTTDIFQTV	23	1	1	P37802		0	1.28016e+08	0.003	0.01529	2.51623	2	1038.51	-0.539375	64.2276	0	C1203	74.07	A6802	0.0045
High	GQFPGHNEF	1	1	1	Q9UKI2		0	5.10476e+06	0.003	0.01342	2.49246	2	1032.45	-0.704132	39.8353	0	C1203	44.44	B1503	0.0015
High	GKFKVTTKF	2	1	1	Q15678		0	554275	0.003	0.01539	2.47968	2	1055.62	-0.382762	31.0216	0	C1203	33.33	B1503	0.0152
High	VAFSQVLTI	5	1	1	Q13487		0	1.38838e+06	0.003	0.01445	2.45478	2	977.567	-0.139547	78.3133	0	C1203	88.89	C1203	0.0221
High	TVIAKVNNV	5	1	1	P26639		0	1.44402e+06	0.003	0.0133	2.43844	2	957.572	-0.382223	34.9262	0	C1203	40.74	A6802	0.0132
High	GQRFLEVQY	3	1	1	Q15149		0	1.96457e+06	0.003	0.01434	2.42565	2	1139.58	-0.341639	52.3414	0	C1203	40.74	B1503	0.0855
High	EVSRISEVL	9	1	1	Q07065		0	9.06598e+06	0.003	0.01511	2.37185	2	1031.57	-0.269224	48.2493	0	C1203	44.44	A6802	0.1187
High	KKIDASQTEF	2	1	1	O94979		0	1.50429e+06	0.003	0.01212	2.36722	2	1166.61	-0.174208	28.7818	0	C1203	34.29	B1503	0.0351
High	FTADVRSVL	7	1	1	O95476		0	5.24442e+06	0.003	0.01169	2.34112	2	1007.55	-0.263896	56.1783	0	C1203	81.48	C1203	0.0094
High	VKNPDGGSY	4	1	1	Q15646		0	428132	0.003	0.01502	2.31004	2	936.442	-0.114369	22.5842	0	C1203	48.15	B1503	0.0469
High	RKAASLKSNY	1	1	1	P36578		0	659587	0.003	0.01383	2.28281	2	1137.64	0.194799	18.5545	0	C1203	28.57	B1503	0.5388
High	AAFRIVVm	4	1	1	Q8WUI4	M8(Oxidation)	0	9.37309e+06	0.003	0.01315	2.26689	2	922.518	-0.149017	53.4456	0	C1203	80	C1203	0.9346
High	DSFPYEFFQV	5	1	1	Q04864		0	578801	0.003	0.0135	2.24548	2	1278.57	-0.0756691	96.8233	0	C1203	57.14	A6802	0.6349
High	TTFPRPVTV	15	1	1	Q15233		0	1.23571e+08	0.003	0.01551	2.20421	2	1017.57	-0.839535	48.0618	0	C1203	88.89	A6802	0.0056
High	YQSPVRVY	1	2	2	Q92503;O43304		0	1.70453e+06	0.003	0.01477	2.19081	2	1011.53	-0.0770128	42.5431	0	C1203	43.33	B1503	0.0188
High	LAFPGEmLL	6	1	1	P43007	M7(Oxidation)	0	5.11195e+06	0.003	0.0154	2.18901	2	1006.53	-0.391362	83.559	0	C1203	85.19	C1203	0.0274
High	EVAELFQRL	6	1	1	Q4V328		0	2.54634e+07	0.003	0.01527	2.18548	2	1104.6	-1.04653	63.4406	0	C1203	44.44	A6802	0.0205
High	LKSGGVNQY	4	1	1	Q15021		0	329764	0.003	0.01227	2.17585	2	965.505	-0.113778	25.5615	0	C1203	48.15	B1503	0.0559
High	QQALHTVQY	2	1	1	Q5SRE5		0	578112	0.003	0.01463	2.17405	2	1087.55	-0.518105	35.1186	0	C1203	44.44	B1503	0.0075
High	GKMNPQSAF	4	1	1	P22307		0	525245	0.003	0.01461	2.1588	2	979.466	-0.467819	34.1222	0	C1203	29.63	B1503	0.0163
High	MATPLLMQA	5	1	1	P04233		0	1.88214e+06	0.003	0.01245	2.1418	2	975.5	0.104023	67.0856	0	C1203	44.44	A6802	0.5602
High	SAYAQIVQF	9	1	1	Q9Y4W6		0	6.85115e+06	0.003	0.01295	2.10904	2	1026.53	-0.299278	68.0873	0	C1203	77.78	C1203	0.0098
High	KKVERQTEL	1	2	2	P11940;Q9H361		0	1.05505e+06	0.003	0.01204	2.10326	2	1130.65	0.0250563	18.0641	0	C1203	44.44	B1503	0.5789
High	FSQDHLVIY	5	1	1	Q9BW91		0	6.13942e+06	0.003	0.01374	2.08662	2	1121.56	0.160882	54.9904	0	C1203	77.78	C1203	0.0724
High	KSFGSAQEF	2	1	1	P35606		0	573315	0.003	0.01316	2.04174	2	1000.47	0.138011	35.8598	0	C1203	70.37	B1503	0.0601
High	LILPGYIDF	6	1	1	P12268		0	1.4063e+06	0.003	0.01233	2.02091	2	1050.59	0.147062	91.3496	0	C1203	40.74	B1503	1.1812
High	RSLLLLSAF	3	1	1	P50454		0	2.25407e+06	0.003	0.01464	2.02046	2	1019.62	-0.216695	74.4535	0	C1203	59.26	B1503	1.039
High	FGVDRAILY	4	1	1	P06756		0	3.75774e+06	0.003	0.01395	1.98458	2	1053.57	0.116058	58.3056	0	C1203	48.15	C1203	0.0963
High	SSFPTVVIY	3	1	1	Q9HCN4		0	1.35797e+07	0.003	0.01341	1.98194	2	1012.53	-0.161636	74.9267	0	C1203	85.19	C1203	0.0227
High	TQAPIFISF	6	1	1	Q15070		0	2.22786e+06	0.003	0.0145	1.98066	2	1023.55	-0.287745	82.9607	0	C1203	44.44	B1503	0.0037
High	VQFGANKSQY	4	1	1	Q7Z7E8		0	603166	0.003	0.01172	1.97433	2	1141.56	-0.137652	34.2503	0	C1203	40	B1503	0.0217
High	GKVKSGGTYF	1	1	1	P55017		0	523953	0.003	0.01355	1.93177	2	1043.55	-0.479161	26.4554	0	C1203	31.43	B1503	0.3228
High	EVMKYITSL	4	1	1	P11586		0	4.96269e+06	0.003	0.01284	1.90272	2	1083.57	-0.68908	59.7155	0	C1203	40.74	A6802	0.0231
High	RKKAYADFY	7	1	1	P09669		0	4.70459e+06	0.003	0.01541	1.90067	2	1161.61	-0.0010005	29.5729	0	C1203	37.04	B1503	0.1727
High	KQQNPRLVY	3	1	1	O00764		0	1.98658e+06	0.003	0.01433	1.85636	2	1145.64	0.127871	29.0982	0	C1203	44.44	B1503	0.0037
High	DVSDILKLL	1	1	1	Q9H446		0	278652	0.003	0.01316	1.70231	2	1015.6	0.0599531	93.4041	0	C1203	48.15	A6802	0.1127
High	ETIFGEWTV	11	1	1	Q96MT1		0	2.60119e+07	0.003	0.01165	1.56129	2	1081.52	0.0812748	83.8063	0	C1203	70.37	A6802	0.0087
High	AGYQHIRMY	7	1	1	Q9BVC4		0	1.09172e+06	0.004	0.01656	2.75142	2	1138.55	0.0535307	34.4028	0	C1203	51.85	C1203	0.1959
High	DVINVFHHL	5	1	1	Q9UK58		0	1.79035e+06	0.004	0.01682	2.73783	2	1093.58	0.0784497	57.3359	0	C1203	37.04	A6802	0.0237
High	GKRIGVFSY	12	1	1	Q01581		0	17498232	0.004	0.01816	2.68878	2	1026.57	-0.321258	41.5018	0	C1203	40.74	B1503	0.081
High	HQKLGIAY	6	1	1	Q9HB58		0	1.82295e+06	0.004	0.01882	2.68566	2	929.52	-0.502706	32.9649	0	C1203	36.67	B1503	0.1127
High	RKKPTTEGF	3	1	1	Q03111		0	1.78253e+06	0.004	0.01623	2.64914	2	1063.59	-0.570252	19.0592	0	C1203	37.04	B1503	0.0347
High	YSAPVIHVL	2	1	1	Q99707		0	884740	0.004	0.01643	2.5277	2	998.567	-0.395948	57.7257	0	C1203	88.89	C1203	0.003
High	RKIPVPANRY	6	1	1	Q9NRX1		0	4.51985e+06	0.004	0.01628	2.50136	3	1213.72	-0.0391514	29.0213	0	C1203	31.43	B1503	0.0568
High	GQYSTGKTSF	3	1	1	Q9NZN4		0	1.15584e+06	0.004	0.01735	2.46476	2	1075.51	-0.0675101	30.903	0	C1203	34.29	B1503	0.0117
High	FAYDGKDYI	5	12	12	P30462;P18463;Q95365;P30475;Q29836;Q31612;P30504;Q9TNN7;P30505;Q95604;Q29865;P13747		0	3.10497e+06	0.004	0.01686	2.41862	2	1091.5	-0.325588	53.8031	0	C1203	77.78	C1203	0.0198
High	ESCGIHETTF	2	6	6	P60709;P63261;Q6S8J3;A5A3E0;P0CG38;P0CG39		0	2.80502e+06	0.004	0.01837	2.3731	2	1123.47	-0.571393	41.436	0	C1203	54.29	A6802	10.0998
High	GQAFPQCVF	8	1	1	P13639		0	2.55358e+06	0.004	0.01687	2.36476	2	996.46	-0.376852	72.8085	0	C1203	37.04	B1503	0.0886
High	YKEEGLKAF	4	1	1	Q00325		0	1.32563e+06	0.004	0.01747	2.36227	2	1084.57	-0.179822	36.0442	0	C1203	40.74	B1503	0.1526
High	QQFLIQQQY	1	1	1	Q6Y7W6		0	1.02309e+06	0.004	0.01807	2.35559	2	1195.61	0.426797	59.9835	0	C1203	40.74	B1503	0.0189
High	YKAFVMETF	1	1	1	Q9BVK8		0	0	0.004	0.01663	2.34674	2	1135.55	-2.51595	61.5519	0	C1203	40.74	B1503	0.2055
High	SKTGGYLVY	4	1	1	P46087		0	2.26452e+06	0.004	0.01841	2.33684	2	987.515	-0.0793601	41.9896	0	C1203	48.15	B1503	0.0282
High	DVAEFLYQV	10	1	1	Q9Y5M8		0	3.03111e+06	0.004	0.01884	2.33351	2	1083.54	-0.608676	85.0288	0	C1203	44.44	A6802	0.0045
High	GKSFTSNSY	6	2	2	Q8N988;Q96NG5		0	339371	0.004	0.01676	2.31141	2	990.453	-0.037339	27.5688	0	C1203	40.74	B1503	0.1071
High	KLDEVPKVY	1	1	1	Q5UIP0		0	370155	0.004	0.01771	2.28583	2	1090.61	-1.03109	40.3891	0	C1203	51.85	B1503	0.2153
High	SASKIIVFV	3	1	1	O15439		0	3.0039e+06	0.004	0.01584	2.26467	2	963.587	-0.129166	58.3292	0	C1203	85.19	A6802	0.0512
High	SKNPHIVSF	2	1	1	Q9P2H3		0	395945	0.004	0.01847	2.26104	2	1028.55	-0.569625	34.6445	0	C1203	44.44	B1503	0.0018
High	RKLFIGGLSF	8	4	4	Q32P51;P09651;P22626;P51991		0	2.40502e+07	0.004	0.01879	2.25618	2	1137.68	-0.470729	62.0066	0	C1203	37.14	B1503	0.0701
High	ETVGILHKV	5	1	1	Q96HH9		0	3.88781e+06	0.004	0.01677	2.1691	2	995.588	-0.51535	36.3797	0	C1203	70.37	A6802	0.0023
High	YQTAPKAGY	1	1	1	Q96KR1		0	190731	0.004	0.0173	2.15992	2	998.494	-0.614353	28.9423	0	C1203	40.74	B1503	0.0139
High	HKIEAGNEF	4	1	1	O43293		0	2.08327e+06	0.004	0.01603	2.11171	2	1044.51	-0.36922	27.4047	0	C1203	37.04	B1503	0.0147
High	KHQPHKVTQY	5	2	2	P83881;Q969Q0		0	1.50358e+06	0.004	0.01791	1.99285	2	1265.68	0.307557	17.2672	0	C1203	31.43	B1503	0.2984
High	VKPRYGLVTY	5	1	1	P00751		0	2.16691e+06	0.004	0.01671	1.73169	2	1195.68	0.0986703	40.2532	0	C1203	28.57	B1503	0.5677
High	RTALPRIF	5	1	1	Q03518		0	3.47243e+06	0.005	0.01966	2.8984	2	973.593	-0.801066	47.8978	0	C1203	63.33	C1203	3.1715
High	GKMNLYESF	2	1	1	Q68E01		0	2.05702e+06	0.005	0.02056	2.71276	2	1088.51	-0.379668	51.8627	0	C1203	29.63	B1503	0.133
High	EVFGLFQKL	12	1	1	P15924		0	1.35774e+07	0.005	0.0199	2.67666	2	1080.61	-0.158358	71.9588	0	C1203	44.44	A6802	0.05
High	RQIGSRSY	3	1	1	P51114		0	4.90588e+06	0.005	0.02032	2.66879	2	966.511	-0.566339	19.3427	0	C1203	30	B1503	0.0166
High	GQRPTQPVY	4	1	1	Q9H0W8		0	1.28645e+06	0.005	0.02073	2.61325	2	1045.54	-0.255727	29.1385	0	C1203	48.15	B1503	0.0039
High	KAISGVHTV	9	2	2	Q2VIR3;P41091		0	3.05524e+06	0.005	0.02158	2.57616	2	911.531	-0.0668626	23.3077	0	C1203	85.19	C1203	0.0197
High	FTAAIISRV	9	1	1	Q9Y570		0	1.20184e+07	0.005	0.02182	2.55979	2	977.576	-1.77261	53.8823	0	C1203	77.78	A6802	0.0048
High	GKTISLTDF	2	1	1	P23588		0	1.17512e+06	0.005	0.01919	2.53081	2	981.525	0.0752077	54.8303	0	C1203	29.63	B1503	1.099
High	RQAPTGLGL	8	1	1	Q9BX59		0	1.80007e+06	0.005	0.01954	2.52798	2	912.526	-0.691494	39.97	0	C1203	51.85	B1503	0.0219
High	GQVQKIVLY	8	1	1	Q00610		0	3.6425e+06	0.005	0.02145	2.47891	2	1047.62	-0.877502	47.7973	0	C1203	44.44	B1503	0.0174
High	EVAALIRSL	3	1	1	Q6P2Q9		0	1.05656e+07	0.005	0.02193	2.46517	2	971.588	-0.224272	60.2367	0	C1203	48.15	A6802	0.0378
High	EAFQGTKVFV	4	1	1	P61289		0	2.03636e+06	0.005	0.01916	2.37777	2	1125.59	-0.669916	52.1664	0	C1203	68.57	A6802	0.1825
High	RKNPVTSTY	5	1	1	Q13131		0	3.73424e+06	0.005	0.01938	2.34178	2	1065.57	-0.217964	23.1665	0	C1203	48.15	B1503	0.0024
High	VKVDLSEKY	1	1	1	P43243		0	943803	0.005	0.02068	2.31834	2	1080.59	-0.147986	37.1322	0	C1203	44.44	B1503	0.1387
High	FTFGSKVTY	3	1	1	Q4LDE5		0	1.67756e+06	0.005	0.01927	2.29878	2	1049.53	-0.980341	51.8557	0	C1203	85.19	C1203	0.0093
High	ESINHVVVF	3	1	1	Q53FT3		0	6.83487e+06	0.005	0.02225	2.25961	2	1043.55	-0.362185	54.7614	0	C1203	70.37	C1203	0.3417
High	RQFWFQGNRY	4	1	1	Q9C0B1		0	1.32808e+06	0.005	0.01909	2.23976	3	1401.68	0.0682849	47.2669	0	C1203	40	B1503	0.0687
High	KKANITFEY	9	1	1	O15372		0	7.32458e+06	0.005	0.02078	2.23961	2	1113.59	-0.33032	37.0655	0	C1203	44.44	B1503	0.0366
High	ETYNGHLVSC	3	1	1	Q9Y4Z0		0	1.40765e+07	0.005	0.01921	2.23905	2	1122.49	-0.444247	38.5121	0	C1203	28.57	A6802	0.8457
High	EVFPVSKTL	5	1	1	Q5UIP0		0	2.36704e+06	0.005	0.0215	2.22682	2	1019.58	-0.683274	51.7305	0	C1203	55.56	A6802	0.0359
High	FTFSGICRV	3	1	1	Q5SY16		0	1.68761e+06	0.005	0.01984	2.20913	2	1029.52	-0.531603	63.7799	0	C1203	81.48	A6802	0.0412
High	AQPETRVSY	1	1	1	Q5SWA1		0	2.1137e+06	0.005	0.02209	2.19332	2	1050.52	-0.416562	30.9487	0	C1203	48.15	B1503	0.0099
High	VmAPRTLIL	29	19	19	P04222;P30504;Q9TNN7;Q29963;P30505;P30508;P30510;Q29960;P30443;P04439;P13746;P30512;P16188;P16189;P10314;P16190;P30455;P30459;Q07000	M2(Oxidation)	0	2.14242e+07	0.005	0.02071	2.16065	2	1029.61	-0.691809	55.9629	0	C1203	55.56	C1203	0.2605
High	VAFPKSLVA	8	1	1	Q8IWI9		0	8.2148e+06	0.005	0.02066	2.15911	2	931.561	-0.236823	53.759	0	C1203	59.26	C1203	0.1419
High	RSYPYAFSV	5	1	1	Q5H9F3		0	3.79849e+06	0.005	0.02015	2.14936	2	1089.54	-0.305597	53.245	0	C1203	77.78	C1203	0.032
High	EIIQRIENV	2	1	1	Q9H074		0	1.12621e+06	0.005	0.01921	2.13756	2	1113.63	-0.358477	48.8771	0	C1203	40.74	A6802	0.0496
High	IQTRGGTF	1	1	1	O14672		0	345622	0.005	0.01944	2.13715	2	879.468	0.0444048	28.695	0	C1203	26.67	B1503	0.6922
High	QTYGYEHIL	4	1	1	Q96AX1		0	3.30835e+06	0.005	0.02127	2.1317	2	1123.54	0.484803	50.5659	0	C1203	74.07	A6802	0.1803
High	FAADIISVL	12	1	1	Q13200		0	7.38195e+06	0.005	0.02022	2.09213	2	948.54	-0.154668	85.5935	0	C1203	92.59	C1203	0.0035
High	AKKEKEPEY	2	1	1	O95793		0	196770	0.005	0.01981	2.02882	2	1121.58	0.894356	17.1678	0	C1203	48.15	B1503	0.1885
High	ETADVIAKV	18	1	1	O43617		0	9.54587e+07	0.005	0.01933	2.0172	2	945.525	-0.448918	42.0501	0	C1203	77.78	A6802	0.0012
High	RAIDFSPYL	3	1	1	P17676		0	7.28505e+06	0.005	0.01905	2.0038	2	1081.57	0.0788875	63.6321	0	C1203	77.78	C1203	0.0061
High	KAIEFVLSC	13	1	1	P53611		0	8.75548e+06	0.005	0.0205	1.96255	2	1009.54	-0.229365	62.0571	0	C1203	48.15	C1203	1.6837
High	HVFDHPWET	2	1	1	Q9Y3B1		0	1.18808e+06	0.005	0.01962	1.94691	2	1167.52	-0.0387022	43.8068	0	C1203	14.81	A6802	0.0856
High	KQIDRQLTAY	1	1	1	Q14204		0	306576	0.005	0.01908	1.86705	2	1235.67	-0.344408	32.5516	0	C1203	34.29	B1503	0.0091
High	SKYAADRNHY	2	1	1	P67809		0	172359	0.005	0.02023	1.77421	2	1224.57	-0.51653	18.2699	0	C1203	31.43	B1503	0.2083
High	ETMNNIDRL	2	1	1	Q5T0N5		0	884506	0.005	0.01987	1.72415	2	1105.53	-0.555755	42.1483	0	C1203	70.37	A6802	0.078
High	TVFSHAQTV	8	2	2	Q71UM5;P42677		0	4.54319e+06	0.006	0.02235	3.11896	2	989.505	-0.111019	34.6407	0	C1203	48.15	A6802	0.0314
High	GQRKGAGSVF	8	1	1	P62917		0	1.14785e+07	0.006	0.02424	2.82536	2	1006.54	-0.259465	22.2451	0	C1203	42.86	B1503	0.0549
High	QGFPNRVVF	17	1	1	P35579		0	2.12841e+07	0.006	0.02402	2.66502	2	1063.57	-0.329586	54.5504	0	C1203	48.15	C1203	0.1618
High	NKWEVPSVY	4	1	1	Q75QN2		0	3.71098e+06	0.006	0.02308	2.58577	2	1121.56	0.0431265	55.3551	0	C1203	48.15	B1503	0.0655
High	SKRIWGELY	5	1	1	Q13823		0	2.532e+06	0.006	0.0233	2.57827	2	1151.62	-0.0314011	45.6508	0	C1203	37.04	B1503	0.2506
High	EVMGRLMEI	1	1	1	Q92616		0	730284	0.006	0.02584	2.55134	2	1077.54	0.0642103	59.4212	0	C1203	37.04	A6802	0.0168
High	SQGSFPEHY	3	1	1	Q9HBH0		0	1.18605e+06	0.006	0.02712	2.53618	2	1051.45	-0.0453895	35.6543	0	C1203	44.44	B1503	0.0672
High	YQYLEQSKY	1	1	1	Q9BTE7		0	420899	0.006	0.02474	2.50459	2	1221.58	-1.17493	40.9352	0	C1203	44.44	B1503	0.0039
High	SVSSVVHYL	3	1	1	Q9NRL2		0	1.93432e+06	0.006	0.02487	2.45335	2	990.525	-0.115203	51.8974	0	C1203	48.15	A6802	0.0169
High	KKLDLISEL	3	1	1	Q2M389		0	4.76025e+06	0.006	0.024	2.43258	2	1058.65	-0.427055	52.5016	0	C1203	48.15	B1503	0.3895
High	FKIADPFVL	5	2	2	P17010;P08048		0	1.90793e+06	0.006	0.02694	2.36981	2	1049.6	0.487731	75.597	0	C1203	48.15	B1503	0.5589
High	TLFGSVIRY	4	1	1	P09871		0	3.97825e+06	0.006	0.02516	2.34244	2	1055.59	-0.360942	63.1933	0	C1203	51.85	B1503	0.1246
High	TLIEDILGV	4	1	1	Q8TEL6		0	1.91382e+06	0.006	0.02228	2.28504	2	972.561	-0.0375037	93.4072	0	C1203	48.15	A6802	0.1405
High	RSATLAAAAL	1	1	1	Q8NG41		0	2.82067e+06	0.006	0.0279	2.18773	2	944.552	-0.576838	28.1366	0	C1203	51.43	C1203	4.6873
High	EAFDRSFEV	6	1	1	Q7Z4W1		0	2.52064e+07	0.006	0.02354	2.15974	2	1099.5	-0.648437	52.6016	0	C1203	85.19	A6802	0.0048
High	AMYSRKAMY	1	1	1	Q02878		0	571173	0.006	0.02479	2.10699	2	1120.53	0.361027	29.347	0	C1203	48.15	B1503	0.1291
High	RTFPWIIEV	6	1	1	P28749		0	7.46762e+06	0.006	0.02428	2.08835	2	1160.65	-0.230568	77.8126	0	C1203	88.89	C1203	0.0297
High	QVFPGLLERV	3	1	1	Q9UBB4		0	3.89525e+06	0.006	0.02587	2.0629	2	1157.67	-0.429634	66.0434	0	C1203	40	A6802	0.2207
High	STYIKKIGY	1	2	2	P68104;Q5VTE0		0	1.27597e+06	0.006	0.0229	1.9618	2	1072.6	-0.27983	34.5919	0	C1203	74.07	C1203	0.3439
High	RKKQSDVMRF	1	1	1	P61313		0	1.19977e+06	0.006	0.02633	1.91888	3	1294.71	0.171078	23.0731	0	C1203	28.57	B1503	0.3282
High	YAFPLAHSL	4	1	1	Q13496		0	9.00525e+06	0.006	0.02508	1.8864	2	1018.54	-0.518869	61.4986	0	C1203	88.89	C1203	0.0016
High	HHVIARHEY	1	1	1	Q8WUH1		0	223804	0.006	0.02618	1.83523	2	1161.59	0.536483	19.003	0	C1203	40.74	B1503	0.2537
High	KEREKILEY	3	1	1	P15924		0	1.27604e+06	0.006	0.02292	1.83214	2	1207.67	-0.221105	29.325	0	C1203	51.85	B1503	0.0138
High	RALALVVTL	3	1	1	O00622		0	3.41627e+07	0.006	0.0239	1.76335	2	955.63	-0.384144	64.9519	0	C1203	85.19	C1203	0.0638
High	KKRPKAESF	3	1	1	P13798		0	298528	0.006	0.02782	1.71223	2	1090.64	-0.265067	17.4677	0	C1203	37.04	B1503	0.0529
High	RAFGIPIRV	17	1	1	P06493		0	1.94943e+08	0.006	0.0254	1.48055	2	1028.64	-0.732605	52.6144	0	C1203	88.89	C1203	0.0166
High	NAYDFImKL	1	1	1	P08183	M7(Oxidation)	0	616199	0.007	0.03217	2.65891	2	1130.56	0.211533	65.4477	0	C1203	85.19	C1203	0.0092
High	KVANIIAEV	1	1	1	P52306		0	995026	0.007	0.02959	2.58236	2	956.577	-0.44565	50.2207	0	C1203	48.15	A6802	0.0455
High	KQIVEILTAY	1	1	1	Q16891		0	2.1422e+06	0.007	0.03275	2.50765	2	1177.68	-0.272276	63.0198	0	C1203	28.57	B1503	0.0421
High	ETADVIAKVAF	3	1	1	O43617		0	925872	0.007	0.02905	2.48591	2	1163.63	-0.058839	61.3815	0		0	A6802	1.3198
High	AVTKIIAKV	7	1	1	P49419		0	1.86669e+06	0.007	0.02972	2.45914	2	942.634	-0.248545	33.8258	0	C1203	44.44	A6802	0.1748
High	HTMDPQLRL	3	1	1	P49327		0	2.91735e+06	0.007	0.02891	2.44453	2	1110.57	-0.160346	41.4421	0	C1203	74.07	A6802	0.0293
High	KAYHEQLTV	3	1	1	Q9BQE3		0	1.44935e+06	0.007	0.03244	2.41293	2	1088.57	-0.315628	29.9303	0	C1203	85.19	C1203	0.0888
High	EVSNIVKEAI	3	1	1	P63172		0	2.16389e+06	0.007	0.03216	2.40223	2	1101.61	-0.473621	50.9968	0	C1203	11.43	A6802	0.435
High	KKSSGEIVY	4	1	1	Q02543		0	7.34931e+06	0.007	0.03284	2.38632	2	1010.55	-0.0375627	23.6034	0	C1203	51.85	B1503	0.0237
High	KRFEPGTQRF	2	1	1	Q70IA8		0	498768	0.007	0.02879	2.37687	3	1265.68	0.55467	28.1936	0	C1203	45.71	B1503	0.0815
High	AHFRGQIYW	4	1	1	O43292		0	0	0.007	0.03009	2.32228	2	1177.59	0.384234	45.2836	0	C1203	11.11	B1503	1.0549
High	HVGDIIKEV	5	2	2	Q14168;Q9NZW5		0	5.60655e+06	0.007	0.03111	2.30044	2	1009.57	-0.348589	42.1241	0	C1203	51.85	A6802	0.0853
High	KKWNLPVYF	3	1	1	Q14746		0	2.88489e+06	0.007	0.03169	2.19718	2	1194.67	-0.401614	60.6022	0	C1203	37.04	B1503	0.068
High	GKSPLFGQY	4	1	1	Q5VT66		0	765517	0.007	0.02976	2.19371	2	996.515	-0.368619	46.3008	0	C1203	48.15	B1503	0.17
High	PQCPSGRVY	6	1	1	Q16186		0	3.13846e+06	0.007	0.03035	2.15743	2	1006.48	-0.107051	32.1946	0	C1203	51.85	B1503	0.9576
High	YIYIRGEFY	3	1	1	P49821		0	1.06312e+06	0.007	0.03046	2.15185	2	1223.61	0.194106	59.3277	0	C1203	44.44	C1203	0.1961
High	QASPFVLRA	4	1	1	Q9BUE0		0	2.03442e+06	0.007	0.03053	2.13904	2	988.557	-0.133214	48.7264	0	C1203	55.56	A6802	0.7658
High	GKAFSQKQY	4	1	1	Q15072		0	330790	0.007	0.03061	2.12248	2	1056.55	-0.242896	20.2643	0	C1203	44.44	B1503	0.2767
High	MRYVASYLL	8	1	1	P05387		0	1.97153e+07	0.007	0.02909	2.10491	2	1115.59	-0.0796856	61.4715	0	C1203	40.74	C1203	0.8132
High	DTTVIIWQV	3	1	1	Q9H7D7		0	3.12804e+06	0.007	0.03038	2.0148	2	1074.58	0.0224378	85.8406	0	C1203	70.37	A6802	0.1785
High	ESSPFVERL	4	1	1	P14625		0	1.55267e+07	0.007	0.02977	1.91588	2	1063.54	-0.558451	49.5091	0	C1203	81.48	A6802	0.1754
High	KQFGNILIL	8	1	1	P52788		0	1.9377e+07	0.007	0.03218	1.90527	2	1045.64	0.0566432	66.5262	0	C1203	51.85	B1503	0.0291
High	HKSPDGRTY	2	1	1	O75400		0	147785	0.007	0.03114	1.72388	2	1060.52	-0.273516	16.9263	0	C1203	55.56	B1503	0.0347
High	KGYPSEFATY	2	1	1	P48730		0	1.01266e+06	0.008	0.03416	2.46499	2	1162.54	-0.411234	46.2004	0	C1203	34.29	B1503	0.7926
High	GKVKSGGTY	3	1	1	P55017		0	1.48583e+06	0.008	0.03305	2.41592	2	896.483	-0.285894	16.9126	0	C1203	40.74	B1503	0.1015
High	TKFMDSVIF	2	1	1	P46940		0	1.46054e+06	0.008	0.03376	2.40937	2	1087.55	-0.50356	65.95	0	C1203	37.04	B1503	0.0555
High	KKTGKTVSY	3	1	1	O00244		0	539372	0.008	0.03495	2.40218	2	1011.58	-0.413173	17.0901	0	C1203	44.44	B1503	0.0228
High	TAQTLVRIL	6	1	1	Q12905		0	2.59751e+06	0.008	0.03408	2.35235	2	1014.63	-0.710494	55.4442	0	C1203	81.48	C1203	1.0533
High	YSYFSPRTM	2	1	1	Q15003		0	1.42908e+06	0.008	0.03528	2.3271	2	1151.52	-0.160547	49.3317	0	C1203	77.78	C1203	0.0041
High	GKNFSKNIF	1	1	1	Q6P1J9		0	825985	0.008	0.03525	2.3189	2	1054.57	-0.357254	34.4509	0	C1203	29.63	B1503	0.2358
High	ESFEKAYQV	6	1	1	Q86V86		0	2.89665e+06	0.008	0.03556	2.273	2	1100.53	-0.0880173	41.9444	0	C1203	74.07	A6802	0.0087
High	FTYGAVVHY	5	1	1	Q96PZ7		0	1.32895e+06	0.008	0.03435	2.26759	2	1056.51	-0.675377	52.285	0	C1203	85.19	C1203	0.0087
High	SSFPRFYFV	4	1	1	Q14204		0	1.19566e+07	0.008	0.03365	2.22218	2	1149.57	0.115065	70.9708	0	C1203	77.78	A6802	0.0816
High	DVARISWYL	4	1	1	Q13011		0	2.97713e+06	0.008	0.03526	2.20636	2	1122.59	-0.195583	72.9403	0	C1203	40.74	A6802	0.0394
High	KKFASFNAY	4	1	1	Q969S3		0	2.28804e+06	0.008	0.03402	2.1474	2	1075.56	0.0327319	35.3055	0	C1203	40.74	B1503	0.0068
High	KIYEPPRYM	3	1	1	Q9H2P9		0	2.39868e+06	0.008	0.03601	2.07533	2	1196.61	-0.0622771	39.9015	0	C1203	44.44	C1203	0.0105
High	KKFSDSVKSTF	2	1	1	Q9ULG6		0	2.77111e+06	0.008	0.03438	2.04533	3	1273.68	0.46607	31.1534	0		0	B1503	0.4049
High	YATFIVTNY	1	1	1	Q9HBL8		0	2.37604e+06	0.008	0.03542	2.03863	2	1091.54	0.351791	69.3067	0	C1203	81.48	C1203	0.1195
High	LKKDDSVGY	4	1	1	Q8N766		0	587335	0.008	0.03429	2.03775	2	1024.53	-0.177625	22.994	0	C1203	44.44	B1503	0.1583
High	EGYPGQRYY	1	1	1	P34896		0	1.08656e+06	0.008	0.0329	1.96898	2	1132.51	-0.562247	38.3651	0	C1203	51.85	C1203	0.3641
High	SKWNTRESY	2	1	1	Q99848		0	514088	0.008	0.03423	1.90994	2	1170.55	-0.696411	26.5686	0	C1203	37.04	B1503	0.0599
High	KKVVKETSY	2	1	1	Q9NZJ7		0	341336	0.008	0.03525	1.846	2	1081.63	-0.160593	17.6823	0	C1203	37.04	B1503	0.0679
High	KQMEDGHTLF	2	1	1	Q96T88		0	1.15998e+06	0.008	0.0359	1.72202	2	1205.56	0.461443	35.7368	0	C1203	28.57	B1503	0.01
High	RKIKVSNTL	4	1	1	P36543		0	5.10736e+06	0.009	0.03839	2.61182	2	1058.67	-0.887383	24.4619	0	C1203	40.74	B1503	0.0758
High	EIFQKPFQTL	3	1	1	Q6DD88		0	2.86786e+06	0.009	0.03998	2.5838	2	1250.68	0.312651	61.4451	0	C1203	40	A6802	0.91
High	YIFEGERVL	1	1	1	Q92738		0	458299	0.009	0.04122	2.53186	2	1125.59	-0.661032	59.4601	0	C1203	55.56	C1203	0.0232
High	VKWKGSLFF	5	1	1	P42695		0	3.47744e+06	0.009	0.04156	2.4837	2	1111.63	-0.220424	57.2359	0	C1203	37.04	B1503	0.03
High	GKADARWVYF	2	1	1	Q9BY08		0	2.41944e+06	0.009	0.039	2.41051	2	1212.62	-0.046927	51.2932	0	C1203	34.29	B1503	0.6324
High	GKFAGNPWYY	2	1	1	P16333		0	1.46813e+06	0.009	0.03686	2.35139	2	1202.56	0.171842	54.6378	0	C1203	48.57	B1503	0.3752
High	KKVTGELAF	3	1	1	Q86XI2		0	1.50782e+06	0.009	0.03818	2.28878	2	992.577	-0.245012	35.5635	0	C1203	33.33	B1503	0.0155
High	RLFKDQLVY	7	1	1	Q9Y3I1		0	7.01171e+06	0.009	0.03931	2.276	2	1181.67	-0.817197	47.4782	0	C1203	48.15	B1503	0.0181
High	IAVNAVLTV	2	1	1	P48643		0	2.11184e+06	0.009	0.04107	2.21962	2	899.556	-0.354179	69.1513	0	C1203	85.19	C1203	0.0444
High	EVITALSKV	1	1	1	Q9P2D7		0	3.82376e+06	0.009	0.03826	2.19647	2	959.577	-0.34436	71.7583	0	C1203	37.04	A6802	0.009
High	KSMFQRTTY	1	1	1	Q9Y262		0	665792	0.009	0.04016	2.17456	2	1161.57	0.0429189	30.7683	0	C1203	70.37	C1203	0.2566
High	SKYPASSSVF	2	1	1	P09629		0	1.30763e+06	0.009	0.03917	2.11021	2	1072.53	0.0672784	40.3317	0	C1203	40	B1503	0.0308
High	EIFSRGPYSV	2	1	1	Q7LBC6		0	1.38983e+06	0.009	0.04021	2.08627	2	1154.58	0.16007	51.9915	0	C1203	40	A6802	0.1114
High	NAFPEIFYT	4	1	1	Q99570		0	1.29167e+06	0.009	0.03659	2.05269	2	1101.53	0.131503	79.1483	0	C1203	51.85	A6802	0.2743
High	KLYPLEIVF	2	1	1	Q9NQT5		0	2.21966e+06	0.009	0.04039	2.03531	2	1121.66	0.125555	78.3954	0	C1203	48.15	B1503	0.0554
High	DLIHEIYTV	1	1	1	P18124		0	1.47828e+06	0.009	0.04036	2.02075	2	1102.58	-0.556146	72.6366	0	C1203	44.44	A6802	0.2239
High	YQKQPKIGY	3	1	1	Q68E01		0	1.08386e+06	0.009	0.03764	1.9221	2	1124.61	-0.199679	29.227	0	C1203	44.44	B1503	0.0059
High	VQFSNHTGY	2	1	1	O00764		0	317734	0.009	0.03988	1.87105	2	1052.48	0.057537	34.4204	0	C1203	48.15	B1503	0.0031
High	RQLQQLISF	1	1	1	Q9NXV6		0	1.07814e+06	0.009	0.04148	1.86534	2	1132.65	0.0222187	61.2942	0	C1203	33.33	B1503	0.0064
High	EVSEIHIKV	2	1	1	P30414		0	1.45545e+06	0.009	0.03753	1.80754	2	1053.59	-0.358622	41.5701	0	C1203	48.15	A6802	0.0039
High	HKVISGTTL	1	1	1	Q9NUL3		0	773200	0.009	0.03745	1.73618	2	955.557	-0.154779	28.7373	0	C1203	40.74	B1503	0.2142
High	KKSKENVLY	1	1	1	P62191		0	356809	0.009	0.04048	1.56976	2	1108.64	-0.409137	20.217	0	C1203	44.44	B1503	0.0672
High	KKVPKGTSSY	1	1	1	Q2NL82		0	0	0.009	0.03874	1.10139	2	1094.62	-0.0569815	17.1739	0	C1203	34.29	B1503	0.0415
Medium	TASPLVKSV	3	1	1	Q6P4F7		0	1.34044e+06	0.01	0.04361	2.54347	2	901.535	-0.637466	34.9813	0	C1203	92.59	A6802	0.2616
Medium	KQYLSYETL	2	1	1	O95084		0	1.18941e+06	0.01	0.04302	2.39828	2	1144.59	-0.0478731	49.8179	0	C1203	44.44	B1503	0.1511
Medium	GKGSFGEVF	6	2	2	Q9P289;Q9Y6E0		0	4.01068e+06	0.01	0.04258	2.35674	2	927.457	-0.495654	46.3794	0	C1203	37.04	B1503	0.253
Medium	LQRATGISF	3	1	1	Q15393		0	1.03086e+06	0.01	0.042	2.30894	2	992.553	0.322037	44.6434	0	C1203	33.33	B1503	0.004
Medium	EIYSESHRV	1	1	1	Q96I51		0	519638	0.01	0.04449	2.22156	2	1119.54	-0.0420007	26.0945	0	C1203	44.44	A6802	0.0266
Medium	RKDEDRKQF	1	1	1	Q9Y3T9		0	103299	0.01	0.04421	2.14445	3	1221.63	0.372045	16.7704	0	C1203	37.04	B1503	0.3609
Medium	YASDVQLIL	3	1	1	Q8NHQ8		0	1.13612e+07	0.01	0.0438	2.0298	2	1021.56	-0.0863898	73.7819	0	C1203	88.89	C1203	0.0293
Medium	EISSILKEL	7	1	1	Q9Y4F5		0	2.60109e+06	0.01	0.04213	1.94359	2	1031.6	-0.272626	66.7023	0	C1203	51.85	A6802	0.2228
Medium	VAAPQVQQV	1	1	1	Q12772		0	581387	0.01	0.04414	1.83143	2	939.526	-0.179809	43.6701	0	C1203	92.59	C1203	0.1209
Medium	RQIIAVVL	1	1	1	Q9BUV8		0	3.32263e+06	0.01	0.04522	1.81925	2	911.604	-0.0285277	58.7597	0	C1203	40	B1503	0.8097
Medium	RKDPNAEGRY	2	1	1	Q8N9N2		0	141871	0.01	0.04264	1.53576	2	1205.6	0.108842	17.2879	0	C1203	31.43	B1503	1.1362
Medium	KKIEDNNTL	4	1	1	P62750		0	1.52353e+07	0.011	0.04995	2.86809	2	1074.58	-0.3261	21.1558	0	C1203	44.44	B1503	0.2575
Medium	FSYVTPRAF	2	1	1	Q9Y4E8		0	1.01045e+06	0.011	0.04741	2.40885	2	1087.56	-0.753329	55.9374	0	C1203	74.07	C1203	0.0067
Medium	FALTNIAVL	1	1	1	P01909		0	1.21394e+07	0.011	0.04887	2.3931	2	961.571	-0.42081	66.3783	0	C1203	85.19	C1203	0.0443
Medium	EVIWLTQHV	1	1	1	Q9UJW0		0	1.83238e+06	0.011	0.04976	2.38455	2	1124.61	-0.000373463	62.2089	0	C1203	37.04	A6802	0.0285
Medium	MTPEIIQKL	8	1	1	Q9UMS4		0	1.40399e+07	0.011	0.05164	2.34108	2	1072.61	-0.386207	55.9314	0	C1203	74.07	A6802	0.0397
Medium	RKIEDNEFHY	1	1	1	O43847		0	354064	0.011	0.0456	2.22497	3	1350.64	0.0300933	31.7015	0	C1203	28.57	B1503	0.311
Medium	HNAGISFSV	7	1	1	P40692		0	4.25574e+06	0.011	0.04912	2.13641	2	931.463	0.0677801	48.5974	0	C1203	44.44	A6802	0.2808
Medium	TVISILNTI	3	1	1	O60716		0	1.2004e+06	0.011	0.04585	2.1351	2	973.592	-0.4175	82.5229	0	C1203	37.04	A6802	0.0184
Medium	KSVDWLLVF	2	1	1	Q96J42		0	1.19277e+07	0.011	0.04575	2.10687	2	1106.63	1.03617	82.282	0	C1203	70.37	C1203	0.219
Medium	KANPGAWIL	3	2	2	Q9NYU2;Q9NYU1		0	8.55169e+06	0.011	0.04855	2.05015	2	969.551	-0.627415	55.9128	0	C1203	81.48	C1203	0.1562
Medium	FTTHILEVI	2	1	1	P15927		0	2.70359e+07	0.011	0.0468	1.97673	2	1072.6	-0.298476	67.3787	0	C1203	66.67	A6802	0.3783
Medium	EVYGSVAKV	2	1	1	Q07864		0	3.04398e+06	0.011	0.04998	1.94686	2	951.515	-0.0392365	36.9646	0	C1203	48.15	A6802	0.0054
Medium	AKLPSETIF	3	1	1	P57678		0	3.54422e+06	0.011	0.05102	1.84126	2	1005.56	-0.607238	53.1474	0	C1203	40.74	B1503	0.0346
Medium	QQFRNAPPF	4	1	1	O60830		0	6.78503e+06	0.011	0.04701	1.80274	2	1104.56	-0.471051	43.7334	0	C1203	33.33	B1503	0.035
Medium	RKAPQHTAVGF	1	1	1	O43242		0	1.00636e+06	0.011	0.0508	1.80097	3	1211.67	0.689151	24.579	0		0	B1503	0.8207
Medium	FTVPHTHVF	1	1	1	Q8NFZ0		0	1.92407e+06	0.011	0.04696	1.784	2	1084.56	-1.05968	48.1138	0	C1203	74.07	C1203	0.0074
Medium	SKPKEKLVY	1	1	1	Q9BTY2		0	1.15428e+06	0.011	0.04697	1.73022	2	1091.65	0.0754755	22.1514	0	C1203	44.44	B1503	0.3946
Medium	DVTAIIFVV	1	2	2	Q5JWF2;P63092		0	7.66484e+06	0.011	0.04871	1.62226	2	976.571	-0.451426	99.6558	0	C1203	44.44	A6802	0.1107
Medium	YTFESTIIY	4	1	1	Q4LDE5		0	4.72953e+06	0.012	0.0528	2.5421	2	1136.55	0.144085	72.7495	0	C1203	81.48	C1203	0.0071
Medium	AKAYPPTSM	2	1	1	Q8NCW5		0	821321	0.012	0.05362	2.42744	2	965.476	-0.252335	32.6967	0	C1203	40.74	B1503	0.0387
Medium	EVWQVIIGA	5	1	1	Q9NR28		0	6.90412e+06	0.012	0.05597	2.37379	2	1014.56	-0.0345844	80.8841	0	C1203	7.41	A6802	0.1687
Medium	FAYSAAPKSm	1	1	1	Q8N697	M10(Oxidation)	0	1.90766e+06	0.012	0.05542	2.31793	2	1088.51	-0.496406	51.6583	0	C1203	68.57	C1203	0.2359
Medium	LSKDGVLYV	3	1	1	Q9H1A4		0	2.89945e+06	0.012	0.05292	2.20374	2	993.562	-0.0516313	48.1378	0	C1203	77.78	C1203	0.3348
Medium	SKTQVTVQY	2	2	2	Q00266;P31153		0	455720	0.012	0.05263	2.19432	2	1053.56	0.252057	33.6148	0	C1203	40.74	B1503	0.0568
Medium	DVFHMVVEV	5	1	1	Q15181		0	6.03391e+07	0.012	0.05542	2.02129	2	1074.53	-0.837205	75.0568	0	C1203	51.85	A6802	0.043
Medium	KKKEKDVQF	2	1	1	Q92544		0	325610	0.012	0.05561	1.97331	2	1149.66	-0.14623	17.8284	0	C1203	37.04	B1503	0.1047
Medium	IGAARTKTY	1	1	1	Q9Y3B1		0	125814	0.012	0.05323	1.83036	2	980.552	-0.348526	19.7046	0	C1203	48.15	C1203	0.3498
Medium	GKAFSRSTY	2	2	2	Q7L945;Q9BS34		0	257182	0.012	0.05248	1.80592	2	1016.52	0.0369002	22.1652	0	C1203	44.44	B1503	0.0658
Medium	EVPPPFTLV	3	1	1	Q8NI35		0	7.44002e+06	0.013	0.05902	2.28614	2	998.556	-0.233081	80.2586	0	C1203	44.44	A6802	0.0081
Medium	EVFNDVRLL	2	2	2	P52907;P47755		0	560217	0.013	0.05617	2.23386	2	1104.6	-0.05194	63.954	0	C1203	48.15	A6802	0.1342
Medium	GKRLDVTGF	4	1	1	Q9UIY3		0	2.10602e+06	0.013	0.05784	2.20984	2	992.553	0.188976	37.348	0	C1203	33.33	B1503	0.1662
Medium	RKKDGQVTF	1	1	1	Q9BW60		0	1.56288e+06	0.013	0.0601	2.12194	2	1078.6	-0.369104	19.8256	0	C1203	40.74	B1503	0.0089
Medium	ISFPAPLYI	3	1	1	P86397		0	1.52855e+06	0.013	0.05716	2.09232	2	1020.58	-0.136938	88.8287	0	C1203	77.78	C1203	0.0251
Medium	AKYKNQVVY	2	1	1	Q9NVR2		0	521704	0.013	0.05625	2.06311	2	1112.61	-0.421263	25.9835	0	C1203	51.85	B1503	0.0038
Medium	ETQKSIYYI	3	1	1	P08238		0	1.1106e+07	0.013	0.05973	1.98384	2	1144.59	0.165427	47.3498	0	C1203	62.96	A6802	0.058
Medium	KMKEIAEAY	2	3	3	P08107;P54652;P11142		0	516481	0.013	0.05687	1.66527	2	1082.55	-0.12199	30.631	0	C1203	40.74	B1503	0.0264
Medium	VKNLNGKSY	1	1	1	Q9HB71		0	91856	0.013	0.05886	1.35475	2	1022.56	-0.0963515	19.8098	0	C1203	44.44	B1503	0.0643
Medium	EVSQVKETL	6	1	1	P30622		0	2.10219e+06	0.014	0.06235	2.36114	2	1032.56	-0.151919	33.9201	0	C1203	44.44	A6802	0.1209
Medium	NIFRNVEV	7	2	2	Q7L523;Q5VZM2		0	8.34476e+06	0.014	0.06622	2.34448	2	990.536	-0.268252	50.4194	0	C1203	50	A6802	4.4054
Medium	RKYGNANVW	4	2	2	P67775;P62714		0	4.69054e+06	0.014	0.06173	2.29383	2	1107.57	-0.382798	30.6031	0	C1203	11.11	B1503	0.1139
Medium	GKWPQVLFF	1	1	1	Q643R3		0	470166	0.014	0.06225	2.28642	2	1121.61	-0.196172	78.4254	0	C1203	44.44	B1503	0.105
Medium	SQFPQPQHF	1	1	1	Q9P215		0	933794	0.014	0.06041	2.27996	2	1115.53	0.111013	45.1537	0	C1203	44.44	B1503	0.0011
Medium	KATNVVRLL	5	1	1	Q9NYU1		0	7.74536e+06	0.014	0.06377	2.27872	2	1013.65	-0.589562	39.2918	0	C1203	81.48	C1203	0.229
Medium	YKAFSANKY	2	1	1	O75882		0	2.38248e+06	0.014	0.06192	2.22966	2	1091.55	-0.775264	25.3105	0	C1203	44.44	B1503	0.0652
Medium	EIFDKIHSL	5	1	1	Q53GS7		0	2.64375e+06	0.014	0.06077	2.18307	2	1101.59	-0.675433	51.4381	0	C1203	48.15	A6802	0.0079
Medium	EVSLPWVHL	1	1	1	Q63HN8		0	2.61991e+06	0.014	0.06344	2.12096	2	1079.59	0.203175	75.8636	0	C1203	44.44	A6802	0.1246
Medium	RAAGVVLEM	1	1	1	Q9Y230		0	1.53595e+06	0.014	0.06118	2.1016	2	945.518	-0.212671	46.8241	0	C1203	85.19	C1203	0.0094
Medium	GKFHSIVRL	2	1	1	O00567		0	838581	0.014	0.06079	2.09513	2	1056.63	-0.623176	35.2966	0	C1203	48.15	B1503	0.5551
Medium	RKEETVTVY	3	1	1	Q9BZX2		0	3.87725e+06	0.014	0.06671	2.09512	2	1124.59	-0.650573	27.3102	0	C1203	48.15	B1503	0.0125
Medium	ITFPGIKLI	1	1	1	O75387		0	942276	0.014	0.06415	2.06333	2	1001.64	-0.588791	75.1722	0	C1203	77.78	C1203	0.1062
Medium	ETFKNSFVEA	2	1	1	Q6NUM9		0	3.82037e+06	0.014	0.06148	2.06045	2	1171.56	-0.20448	46.1291	0	C1203	25.71	A6802	0.2715
Medium	HSAPFSWET	1	1	1	Q9H425		0	2.1123e+06	0.014	0.06612	2.01966	2	1061.47	-0.043121	49.1203	0	C1203	44.44	A6802	0.7945
Medium	FKIKITSEL	1	1	1	Q14141		0	3.12897e+06	0.014	0.06642	2.00561	2	1078.65	0.0770728	51.172	0	C1203	44.44	B1503	0.5186
Medium	AKYPIKQSL	6	1	1	P21283		0	2.30017e+06	0.014	0.06235	1.96625	2	1047.62	-0.411415	31.6947	0	C1203	51.85	B1503	0.0819
Medium	TVTSVLEYL	4	1	1	O14893		0	4.31928e+06	0.014	0.06063	1.94714	2	1024.56	-0.171292	81.5736	0	C1203	40.74	A6802	0.0717
Medium	RAAPFSLEY	2	1	1	Q15181		0	4.58908e+06	0.014	0.06642	1.84858	2	1053.54	-0.450891	54.2896	0	C1203	92.59	C1203	0.008
Medium	AKFGSKEEY	3	1	1	Q5VWQ8		0	794283	0.014	0.0646	1.83637	2	1058.52	-0.148304	22.9518	0	C1203	51.85	B1503	0.0236
Medium	STSAVNHNV	1	1	1	Q07157		0	144936	0.014	0.06322	1.60902	2	928.448	-0.0231717	19.4134	0	C1203	70.37	A6802	0.0123
Medium	AAFPFYRLF	2	1	1	O00622		0	1.57602e+06	0.014	0.06158	1.56459	2	1131.6	0.267985	80.645	0	C1203	85.19	C1203	0.0398
Medium	KEFLDKKKY	2	1	1	O43683		0	1.17677e+06	0.015	0.06894	2.507	3	1198.68	0.226869	19.5542	0	C1203	44.44	B1503	0.1713
Medium	RQYPTPFQL	5	1	1	Q8ND82		0	3.80739e+06	0.015	0.07004	2.46937	2	1149.61	0.105174	58.0341	0	C1203	51.85	B1503	0.0118
Medium	EAFHYIFNV	1	1	1	Q9UEY8		0	1.10423e+08	0.015	0.06817	2.35665	2	1139.55	0.31983	68.7788	0	C1203	81.48	A6802	0.0266
Medium	ETSGIGEARV	1	1	1	P61764		0	1.84736e+06	0.015	0.07088	2.29388	2	1018.52	-0.495388	32.1704	0	C1203	42.86	A6802	0.0618
Medium	YNFEKPVVM	2	1	1	O43929		0	2.09502e+06	0.015	0.07108	2.236	2	1126.56	-0.400617	53.8035	0	C1203	51.85	C1203	0.0617
Medium	AQISWVTVF	2	1	1	Q9NZ01		0	694094	0.015	0.06698	2.22688	2	1050.56	-0.430564	85.743	0	C1203	44.44	B1503	0.0067
Medium	GKWNLKQQY	2	1	1	O95067		0	696587	0.015	0.06785	2.1656	2	1164.62	-0.031688	33.653	0	C1203	37.04	B1503	0.1887
Medium	SQYQGVVVY	1	1	1	Q9Y221		0	1.6731e+07	0.015	0.07003	2.15742	2	1042.52	-0.554724	54.3284	0	C1203	51.85	B1503	0.0007
Medium	NSSQVVVAV	5	1	1	Q16531		0	6.21782e+06	0.015	0.06759	2.13808	2	902.493	-1.04001	47.6943	0	C1203	77.78	A6802	0.0339
Medium	RKFTQLREY	2	1	1	O95625		0	1.04736e+06	0.015	0.06744	2.03261	3	1240.68	0.197064	28.941	0	C1203	48.15	B1503	0.0127
Medium	AQRYLLQY	4	1	1	P25789		0	1.70599e+06	0.015	0.06735	2.02959	2	1054.57	-0.213052	48.3641	0	C1203	26.67	B1503	0.3586
Medium	YKLDKQHTF	4	1	1	P55884		0	546478	0.015	0.06824	2.02093	2	1179.62	-0.570921	28.837	0	C1203	40.74	B1503	0.0147
Medium	GKSSLIVSY	5	1	1	Q96L33		0	3.28662e+06	0.015	0.06877	1.921	2	953.53	-0.246914	43.4422	0	C1203	51.85	B1503	0.0338
Medium	KVPPFTFHV	7	1	1	Q6NZI2		0	5.48289e+06	0.015	0.06957	1.86729	2	1071.6	-0.286581	53.854	0	C1203	44.44	A6802	0.1402
Medium	IKHPNSIEY	2	1	1	Q7L7X3		0	562454	0.015	0.06808	1.50175	2	1100.57	-0.201271	30.5315	0	C1203	51.85	B1503	0.0063
Medium	KKVEKSKIF	1	1	1	Q9NVP1		0	149953	0.015	0.06759	1.20437	2	1106.69	-0.530182	19.3426	0	C1203	37.04	B1503	0.0682
Medium	GKKGPQSLF	2	1	1	P46087		0	3.73866e+06	0.016	0.0771	2.54226	2	961.546	-0.417165	31.6391	0	C1203	33.33	B1503	0.2266
Medium	DVYDKVDYL	1	1	1	Q14254		0	2.01438e+06	0.016	0.07388	2.51022	2	1129.54	-0.0230235	57.2087	0	C1203	48.15	A6802	0.0235
Medium	AMRLGAEVY	3	1	2	P09104;P06733		0	2.79794e+06	0.016	0.07163	2.26967	2	1009.51	-0.225888	45.3151	0	C1203	44.44	B1503	0.0456
Medium	IKMDASLGNLF	2	1	1	Q92520		0	945008	0.016	0.07469	2.13171	2	1208.63	-0.298269	71.2502	0		0	B1503	1.1398
Medium	EVFLKAFAV	3	1	1	O95373		0	2.25503e+06	0.016	0.07494	2.11804	2	1023.59	-0.310251	67.4668	0	C1203	40.74	A6802	0.0388
Medium	KKAHLGTAL	2	1	1	P62266		0	1.36329e+06	0.016	0.07689	2.10962	2	938.578	-0.181947	20.8707	0	C1203	40.74	B1503	0.1968
Medium	EVIRDVINV	5	1	1	Q6IEG0		0	7.68802e+06	0.016	0.07715	2.04774	2	1056.6	-0.16983	54.6681	0	C1203	44.44	A6802	0.0084
Medium	YAYDGKDYI	6	17	17	P01892;P30447;P05534;P10316;P01889;P30460;Q04826;P30479;P30480;P30486;P18464;P30490;P30498;Q31610;P30499;P04222;P17693		0	1.78123e+06	0.016	0.07395	2.04397	2	1107.5	-0.675888	46.1695	0	C1203	77.78	C1203	0.0099
Medium	LKVKGNVF	5	1	1	P84098		0	1.58922e+06	0.016	0.07542	1.95874	2	904.561	-0.136386	34.1544	0	C1203	33.33	B1503	1.1998
Medium	RQVGATVEF	2	1	1	Q13432		0	2.97585e+06	0.016	0.07463	1.92964	2	1006.53	-0.613833	41.2675	0	C1203	40.74	B1503	0.0032
Medium	AQFKGTQSL	2	1	1	Q9UK61		0	2.77093e+06	0.016	0.07722	1.92576	2	979.521	0.288297	32.4747	0	C1203	44.44	B1503	0.0068
Medium	AQLPEKVEY	2	1	1	P51532		0	2.4063e+06	0.016	0.07662	1.90183	2	1076.56	0.0112935	42.2625	0	C1203	55.56	B1503	0.006
Medium	SKYQTVEKL	1	1	1	Q9H0S4		0	448356	0.016	0.0715	1.88745	2	1095.6	-0.280872	29.0851	0	C1203	44.44	B1503	0.3012
Medium	TKFGGIVVL	1	1	1	O15118		0	0	0.016	0.07416	1.83454	2	933.577	0.129176	62.1652	0	C1203	55.56	B1503	0.0965
Medium	YIFEEPFTI	2	1	1	P08237		0	554002	0.016	0.07716	1.77418	2	1158.57	0.239763	88.1178	0	C1203	48.15	A6802	0.036
Medium	HAAKVILQV	5	1	1	Q63HN8		0	3.518e+06	0.016	0.07345	1.73987	2	978.609	-0.163228	36.9866	0	C1203	85.19	A6802	0.0357
Medium	EGSPIKVTL	1	1	1	P06748		0	1.10278e+06	0.016	0.07274	1.73113	2	943.545	-0.814715	50.863	0	C1203	55.56	A6802	0.9265
Medium	HVIDLDDATFL	3	1	1	Q8N8R7		0	6.42189e+06	0.016	0.0764	1.69893	2	1258.63	0.246431	72.8299	0		0	A6802	1.319
Medium	YTYGQGTYGA	1	1	1	Q92841		0	597703	0.017	0.07981	2.4756	2	1080.46	-0.534231	41.9651	0	C1203	25.71	A6802	0.1066
Medium	DTFSYTVRI	1	1	1	Q96P70		0	1.20205e+06	0.017	0.08109	2.45958	2	1101.56	-0.211269	61.0923	0	C1203	70.37	A6802	0.0237
Medium	IKVIPTVF	1	1	1	P14902		0	1.30566e+07	0.017	0.07984	2.3543	2	916.586	-0.404791	63.5157	0	C1203	33.33	B1503	0.797
Medium	SAHSKVVIF	1	1	1	Q8IX04		0	996732	0.017	0.08106	2.34695	2	987.562	-0.421364	35.4958	0	C1203	77.78	C1203	0.0602
Medium	RQLNLITRF	1	1	1	Q86WI3		0	1.89874e+06	0.017	0.07977	2.32402	2	1160.69	-0.45029	48.7246	0	C1203	33.33	B1503	0.0054
Medium	NTLQTKVQL	3	1	1	Q9NT22		0	9.73315e+06	0.017	0.08112	2.32018	2	1044.61	3.93738	87.6648	0	C1203	70.37	A6802	0.6562
Medium	DVIEVIEKA	1	1	1	P24928		0	2.2429e+06	0.017	0.0787	2.24757	2	1015.57	-0.357742	60.5588	0	C1203	7.41	A6802	0.0525
Medium	GKIERAIGL	4	1	1	O60869		0	1.11568e+06	0.017	0.08083	2.2351	2	956.589	-0.00897362	37.4888	0	C1203	44.44	B1503	0.9707
Medium	AASALIRTL	1	1	1	Q13535		0	1.80597e+06	0.017	0.07961	2.2053	2	915.561	-0.865408	47.9214	0	C1203	92.59	C1203	0.0771
Medium	EVVHTPETSV	2	1	1	O15427		0	3.09523e+06	0.017	0.08008	1.91935	2	1097.55	0.369725	36.3762	0	C1203	25.71	A6802	0.2305
Medium	RHVDAMNEY	1	1	1	Q96N46		0	205988	0.017	0.08177	1.81711	2	1134.5	-0.241563	26.3021	0	C1203	44.44	B1503	0.033
Medium	TAVTVNQSL	2	1	1	P05787		0	1.39916e+06	0.017	0.08173	1.77115	2	932.505	0.039722	45.1993	0	C1203	74.07	C1203	0.3481
Medium	HVVDFFNRI	1	2	2	Q86TA1;Q70IA8		0	1.25553e+06	0.017	0.07833	1.75023	2	1146.61	-0.1998	56.681	0	C1203	33.33	A6802	0.0175
Medium	LTVPFARYL	4	2	2	P12081;P49590		0	4.39516e+06	0.017	0.08121	1.63088	2	1079.62	-0.478058	72.7129	0	C1203	77.78	C1203	0.1659
Medium	VVPQFVVFY	1	1	1	O14949		0	6.2869e+06	0.017	0.08134	1.49294	2	1097.6	-0.293885	86.2114	0	C1203	48.15	C1203	0.8996
Medium	EAMELIVKL	3	1	1	Q9BVS4		0	2.4867e+06	0.018	0.08372	2.62062	2	1045.6	-0.371564	67.6472	0	C1203	85.19	A6802	0.0413
Medium	HAIDRVTTSV	5	1	1	Q9BTT6		0	2.24574e+06	0.018	0.08436	2.47651	2	1098.59	-0.429661	31.5537	0	C1203	60	A6802	0.0587
Medium	QTYRLLDY	1	1	1	Q8N6Y1		0	5.11577e+06	0.018	0.08218	2.33822	2	1071.55	-0.482464	52.4091	0	C1203	53.33	C1203	8.9726
Medium	VKAPSSQTF	2	1	1	Q86TC9		0	452819	0.018	0.0844	2.19856	2	964.51	0.139998	32.4958	0	C1203	48.15	B1503	0.0054
Medium	EVVDKINQV	3	1	1	Q8WXH0		0	1.66047e+06	0.019	0.08756	2.44498	2	1043.57	-1.31889	38.7476	0	C1203	44.44	A6802	0.0052
Medium	TVARPSVPA	8	1	1	P08174		0	1.72833e+07	0.019	0.09063	2.42441	2	897.515	-0.391217	31.8357	0	C1203	7.41	A6802	0.2629
Medium	TVFNFPVSI	4	1	1	P28562		0	2.70685e+06	0.019	0.09035	2.42317	2	1023.55	-0.168483	86.869	0	C1203	40.74	A6802	0.0165
Medium	AKGPGLFF	5	2	2	Q9NP85;P27105		0	4.5858e+06	0.019	0.0912	2.25042	2	836.467	-0.0143485	56.4907	0	C1203	33.33	B1503	1.9107
Medium	ELYYRAIQF	2	1	1	Q00610		0	2.62359e+06	0.019	0.09044	2.03993	2	1202.62	-0.0435492	63.2358	0	C1203	37.04	B1503	1.1276
Medium	GKLPRSPSF	1	1	1	Q9P0N9		0	1.37338e+06	0.019	0.08901	1.9965	2	988.557	-0.318439	34.1679	0	C1203	37.04	B1503	0.0307
Medium	MSKLISEM	1	2	2	Q16666;Q8WTT2		0	897208	0.019	0.09068	1.9794	2	938.468	-0.321782	44.5247	0	C1203	83.33	C1203	3.785
Medium	HKVSPMLY	1	1	1	Q13619		0	809308	0.019	0.09021	1.9572	2	974.513	-0.0907005	34.1955	0	C1203	26.67	B1503	0.8772
Medium	STFGYVHGV	2	1	1	P38606		0	2.01012e+06	0.019	0.08793	1.9527	2	966.468	-0.102671	44.8809	0	C1203	77.78	A6802	0.0026
Medium	KKAQAQPVM	1	1	1	P24539		0	315430	0.019	0.08591	1.68402	2	1000.56	-0.21567	19.1947	0	C1203	37.04	B1503	0.1202
Medium	FTWEGLYNV	7	1	1	P51784		0	8.4445e+06	0.019	0.08609	1.66934	2	1128.54	0.0966839	80.9519	0	C1203	74.07	A6802	0.009
Medium	ETFEHPNVV	4	1	1	Q00534		0	9.55703e+06	0.019	0.08582	1.64102	2	1071.51	-0.840073	42.7421	0	C1203	81.48	A6802	0.0088
Medium	AKAGGFVVGY	1	1	1	Q9HAV4		0	509585	0.02	0.09494	2.29103	2	968.52	-0.225406	45.9741	0	C1203	40	B1503	0.1049
Medium	RKVLTEPEVRY	1	1	1	Q9NYY3		0	2.33926e+06	0.02	0.09253	2.22385	3	1389.78	-0.318612	34.3046	0		0	B1503	1.2134
Medium	AKSGVGTAL	1	1	1	P02786		0	344837	0.02	0.0928	2.22177	2	803.462	0.0940144	26.6616	0	C1203	48.15	B1503	0.1989
Medium	VAGSAEANAF	2	1	1	P22695		0	428132	0.02	0.09741	2.18322	2	936.442	0.124985	22.7889	0	C1203	57.14	B1503	4.0656
Medium	ETADITHAL	5	1	1	Q15042		0	1.61153e+06	0.02	0.09377	2.1571	2	970.484	-0.298911	43.5585	0	C1203	74.07	A6802	0.0018
Medium	AAAPQLLIV	3	1	1	Q10589		0	5.47209e+06	0.02	0.09296	2.13047	2	895.561	-0.246343	73.3291	0	C1203	92.59	C1203	0.2252
Medium	YQILQGIVF	5	1	1	P06493		0	1.10953e+06	0.02	0.09397	2.09417	2	1080.61	-0.704672	87.6695	0	C1203	40.74	B1503	0.0164
Medium	YTIPLAIKL	2	1	1	Q9H490		0	1.07449e+06	0.02	0.09438	2.0815	2	1031.65	0.206255	72.9031	0	C1203	81.48	C1203	0.0103
Medium	KKAIQDPAF	2	1	1	Q7Z6Z7		0	511059	0.02	0.09877	2.06036	2	1017.57	-0.669419	30.2351	0	C1203	33.33	B1503	0.0426
Medium	GQIPEIIFY	1	1	1	Q9H0C5		0	476402	0.02	0.09771	1.77285	2	1079.58	0.43815	84.9631	0	C1203	51.85	B1503	0.0145
Medium	RNYYRKIGY	2	1	1	Q9H9T3		0	1.15968e+06	0.02	0.09803	1.71231	3	1232.65	0.119923	28.1437	0	C1203	44.44	B1503	0.4643
Medium	GKFHQESKF	1	1	1	Q562F6		0	173999	0.02	0.09192	1.17833	2	1107.56	-0.162793	20.409	0	C1203	33.33	B1503	0.1501
Medium	GKSGVAITF	4	1	1	Q9BUQ8		0	1.52654e+06	0.021	0.09969	2.51167	2	879.494	0.167832	45.6643	0	C1203	44.44	B1503	0.0385
Medium	LPVDIRQYL	1	1	1	P52630		0	1.35883e+06	0.021	0.101	2.22157	2	1116.64	-0.154472	71.3006	0	C1203	40.74	C1203	0.9833
Medium	RQYEQQTY	1	1	1	Q9Y262		0	83140.3	0.021	0.1011	1.74277	2	1115.51	-0.307691	24.7818	0	C1203	26.67	B1503	0.0071
Medium	ESFIKAIGV	2	1	1	Q9NRN7		0	1.62646e+06	0.021	0.102	1.7001	2	963.551	-0.316041	58.7206	0	C1203	74.07	A6802	0.0612
Medium	KKFNEPGSQY	1	1	1	P51531		0	272414	0.021	0.1017	1.69227	2	1197.59	0.29748	25.6109	0	C1203	40	B1503	0.0373
Medium	RAFGGILVV	2	1	1	Q8NHX9		0	2.64956e+07	0.021	0.1022	1.64847	2	931.572	-0.181533	62.3211	0	C1203	92.59	C1203	0.0088
Medium	VFIYPSLIY	1	1	1	Q8NBW4		0	584279	0.022	0.1029	2.4703	2	1114.62	-1.093	87.9036	0	C1203	44.44	B1503	1.0362
Medium	EAVSVIQSI	2	1	1	Q9P035		0	2.21495e+06	0.022	0.1049	2.42936	2	945.525	-0.115584	62.3884	0	C1203	74.07	A6802	0.0782
Medium	SQRAGLQF	3	2	2	Q71UI9;P0C0S5		0	2.046e+06	0.022	0.1054	2.28966	2	906.479	-0.131012	36.8338	0	C1203	26.67	B1503	0.0897
Medium	AKINEIRQM	1	1	1	Q15366		0	689528	0.022	0.1023	2.12125	2	1102.6	-0.548055	30.2196	0	C1203	40.74	B1503	0.0761
Medium	EVYRGKLIEA	1	1	1	P62318		0	835540	0.022	0.1064	1.77977	2	1177.66	0.136833	35.3599	0	C1203	8.57	A6802	0.3445
Medium	KEYERFSKY	1	2	2	O00148;Q13838		0	218296	0.022	0.1033	1.76296	2	1249.62	-0.430717	25.8291	0	C1203	44.44	B1503	0.0116
Medium	ALWIGTTSF	2	1	1	Q9NS69		0	508736	0.022	0.1053	1.57655	2	995.52	0.0609272	79.5308	0	C1203	33.33	B1503	0.0363
Medium	YTIGKEIIDLV	1	3	3	Q71U36;P68363;Q9BQE3		0	843853	0.023	0.1084	2.33403	2	1263.72	0.964947	73.2791	0		0	A6802	1.2243
Medium	DLTSLNNTL	1	1	1	Q5KU26		0	3.02902e+06	0.023	0.1097	2.16217	2	990.51	0.173926	49.2444	0	C1203	44.44	A6802	1.1595
Medium	SVFGQVERA	1	1	1	Q15233		0	1.02042e+06	0.023	0.109	2.04204	2	992.517	0.5711	39.6312	0	C1203	11.11	A6802	0.2015
Medium	EVFFKEIFL	2	2	2	Q9Y6D6;Q9Y6D5		0	2.5803e+06	0.023	0.1099	1.98275	2	1171.64	-0.636387	79.6404	0	C1203	44.44	A6802	0.0757
Medium	DTFDKNYKA	5	1	1	Q9BZG1		0	1.70801e+06	0.023	0.1088	1.97091	2	1101.52	-0.0976899	27.0298	0	C1203	37.04	A6802	0.0393
Medium	ETIGVVHLV	2	1	1	Q63HN8		0	1.33606e+07	0.023	0.1097	1.66418	2	966.562	-0.341689	57.1389	0	C1203	74.07	A6802	0.002
Medium	AALTFPVLF	4	1	1	Q05D32		0	1.86778e+06	0.023	0.1076	1.66067	2	978.566	-0.21447	95.8774	0	C1203	77.78	C1203	0.3503
Medium	KSGPTSYL	1	1	1	Q5T686		0	510612	0.024	0.1121	2.46001	2	852.446	0.253853	34.8623	0	C1203	70	C1203	6.0005
Medium	HSVYIPNKV	1	1	1	Q8TB22		0	398296	0.024	0.1114	2.41203	2	1056.58	1.02509	34.313	0	C1203	70.37	A6802	0.094
Medium	AAISHGRVF	1	1	1	Q9NRX2		0	933545	0.024	0.1113	1.95057	2	957.526	-0.429951	30.0647	0	C1203	81.48	B1503	0.051
Medium	KKDDAITAY	1	1	1	Q9BY77		0	686325	0.024	0.1113	1.91386	2	1024.53	0.0606698	25.4158	0	C1203	44.44	B1503	0.0249
Medium	GQKDVSALF	1	1	1	Q92794		0	259971	0.024	0.1107	1.74657	2	964.51	-0.123494	21.76	0	C1203	33.33	B1503	0.0093
Medium	IKKNNPRKY	1	2	2	P67809;P16989		0	279768	0.024	0.1108	1.61543	2	1160.69	0.294519	16.4449	0	C1203	44.44	B1503	0.3351
Medium	GKNLYTNEY	1	3	3	Q9HCP0;P78368;Q9Y6M4		0	487519	0.025	0.1176	2.55557	2	1101.52	-0.190353	33.1798	0	C1203	40.74	B1503	0.0801
Medium	ETFGMKLSV	3	2	2	Q9GZQ8;A6NCE7		0	2.66435e+06	0.025	0.117	2.33065	2	1011.52	-0.0695988	57.338	0	C1203	77.78	A6802	0.0094
Medium	DTFRGVAFV	4	1	1	O15067		0	1.03137e+07	0.025	0.1131	2.28948	2	1011.53	-0.538935	60.9895	0	C1203	74.07	A6802	0.0107
Medium	EIFDSRGNPTV	1	1	1	P06733		0	939988	0.025	0.1175	2.05241	2	1234.61	0.1552	46.6497	0		0	A6802	0.5027
Medium	EIFSKNYRV	1	1	1	Q9NVU0		0	3.15138e+06	0.025	0.1143	2.05006	2	1155.61	-1.43649	38.4913	0	C1203	44.44	A6802	0.0224
Medium	HQIKSLQY	3	1	1	Q9NW82		0	2.36294e+06	0.025	0.1138	1.9653	2	1016.55	-0.0163025	29.2833	0	C1203	26.67	B1503	0.0968
Medium	SAYPLSVEW	1	1	1	Q13610		0	1.66101e+06	0.025	0.1174	1.85072	2	1051.51	-0.186739	74.69	0	C1203	55.56	C1203	0.0715
Medium	NAFHHPSAV	1	1	1	P32314		0	400614	0.025	0.1165	1.79333	2	979.475	0.189565	24.9228	0	C1203	81.48	A6802	0.0977
Medium	TQMDVKLVF	1	1	1	Q17RS7		0	1.23511e+06	0.025	0.1174	1.30875	2	1080.58	-0.563023	62.9827	0	C1203	40.74	B1503	0.0055
Medium	LQQPRSLTY	3	1	1	P22102		0	1.5584e+06	0.026	0.1194	2.33609	2	1105.6	-0.917763	40.4782	0	C1203	51.85	B1503	0.0046
Medium	ALPEFTSIF	2	1	1	Q13887		0	937768	0.026	0.1187	2.09874	2	1024.53	-0.179264	87.3301	0	C1203	37.04	B1503	0.4803
Medium	YNFEYSVVF	1	1	1	O75787		0	809400	0.026	0.1186	1.96064	2	1167.54	0.0795696	81.6192	0	C1203	48.15	B1503	0.1325
Medium	ETFSGVYKKL	3	1	1	P62081		0	1.26522e+06	0.026	0.1192	1.64718	2	1171.64	-0.313856	41.7929	0	C1203	60	A6802	0.17
Medium	RQKDVKDGKY	3	1	1	P62269		0	160786	0.026	0.1185	1.21634	2	1236.67	-0.953158	16.5439	0	C1203	34.29	B1503	0.1723
Medium	VAADIAVQL	1	1	1	P08240		0	972372	0.027	0.1216	2.6477	2	899.519	-0.282953	64.6078	0	C1203	88.89	C1203	0.0199
Medium	HKYLLVEFY	1	1	1	P07237		0	3.03035e+06	0.027	0.1212	2.40153	2	1211.65	-0.217736	60.1672	0	C1203	44.44	B1503	0.4985
Medium	EIAQVVEKV	3	1	1	Q9BYK8		0	1.30363e+07	0.027	0.1232	2.03114	2	1014.58	-0.286881	44.4614	0	C1203	44.44	A6802	0.0187
Medium	SKRTGVQTF	1	1	1	P53621		0	2.93908e+06	0.028	0.126	2.30187	2	1023.56	-0.176153	22.3446	0	C1203	37.04	B1503	0.0122
Medium	ELINIIDGVL	1	1	1	Q8NI22		0	651134	0.028	0.1281	2.29166	2	1098.64	-0.120915	95.2787	0	C1203	34.29	A6802	1.3526
Medium	KAVGHPFVI	3	1	1	O14980		0	1.40327e+07	0.028	0.1279	2.11765	2	967.572	-0.479848	38.3117	0	C1203	77.78	C1203	0.1068
Medium	LAEFVVQKI	1	1	1	O75165		0	952467	0.028	0.1288	2.06459	2	1046.62	-0.304019	68.9672	0	C1203	70.37	C1203	4.3124
Medium	FAYEGPmYL	1	1	1	Q96MT1	M7(Oxidation)	0	863372	0.028	0.1277	2.04679	2	1106.49	-0.525021	69.9231	0	C1203	88.89	C1203	0.0008
Medium	TAFETIILL	1	1	1	A4D1E9		0	902307	0.028	0.1284	2.02038	2	1020.6	-0.218134	91.168	0	C1203	88.89	C1203	0.0213
Medium	EILNIFQGV	1	1	1	Q9H0H0		0	774497	0.028	0.1263	1.94337	2	1032.57	-0.0348701	85.5629	0	C1203	37.04	A6802	0.0751
Medium	EALNVIVRL	2	1	1	Q5UIP0		0	3.19694e+06	0.028	0.1257	1.86358	2	1026.63	0.239301	64.0696	0	C1203	81.48	A6802	0.2042
Medium	RQIDLVDNYF	2	1	1	Q9UPN9		0	1.68374e+06	0.028	0.1286	1.74469	2	1282.64	0.154809	64.4674	0	C1203	34.29	B1503	0.0589
Medium	YKEKTGQEY	1	1	1	P07814		0	173054	0.028	0.1261	1.59737	2	1145.55	-0.907037	18.4741	0	C1203	44.44	B1503	0.2057
Medium	KKKQIEQKF	1	1	1	Q9NQS7		0	702090	0.028	0.1249	1.49579	2	1176.71	0.135383	18.1	0	C1203	29.63	B1503	0.1509
Medium	TTIAIPFGTALV	2	1	1	Q5GLZ8		0	2.41595e+06	0.028	0.1256	1.48128	2	1203.7	0.203288	89.5152	0		0	A6802	0.6913
Medium	RMWKTLTFF	1	1	1	P12074		0	1.4071e+07	0.029	0.1301	2.63508	2	1229.65	0.239786	62.7127	0	C1203	29.63	B1503	0.2979
Medium	GQSRLIFTY	1	1	1	Q96Q89		0	2.23937e+06	0.029	0.1311	2.31664	2	1084.58	-0.958025	54.2223	0	C1203	48.15	B1503	0.0742
Medium	YSADGHSIL	1	1	1	Q15269		0	576142	0.029	0.1304	2.30521	2	962.458	0.126801	42.1946	0	C1203	77.78	C1203	0.0298
Medium	NAQGILTRLY	1	1	1	Q9NR71		0	3.37879e+06	0.029	0.132	2.28418	2	1148.65	3.49675	77.6173	0	C1203	62.86	B1503	4.7757
Medium	DLSSVISKI	2	1	1	Q6PL18		0	1.74916e+06	0.029	0.1334	2.26361	2	961.556	-0.419557	68.2486	0	C1203	40.74	A6802	0.5587
Medium	AQVKLLEF	1	1	1	Q9NR09		0	853668	0.029	0.1302	2.18951	2	947.558	2.11146	59.5571	0	C1203	33.33	B1503	0.3261
Medium	GKSGHILSY	1	1	1	O75376		0	316627	0.029	0.131	2.11288	2	961.51	-0.00193998	28.8517	0	C1203	51.85	B1503	0.0134
Medium	GKPGHLQFY	2	1	1	Q8IWA0		0	826271	0.029	0.1297	2.04798	2	1046.54	-0.607722	34.9451	0	C1203	40.74	B1503	0.7703
Medium	GKPPTWSEF	2	1	1	O95573		0	1.9834e+06	0.029	0.133	1.92951	2	1048.51	0.0610333	49.1954	0	C1203	40.74	B1503	0.7285
Medium	KAFARPWSL	1	1	1	Q8NAF0		0	2.00788e+06	0.029	0.1324	1.82633	2	1075.6	-0.338028	45.7003	0	C1203	81.48	C1203	0.0108
Medium	SKYGRDWERY	1	1	1	Q9UBM7		0	455941	0.029	0.1311	1.60419	3	1359.64	0.0565267	30.7786	0	C1203	34.29	B1503	0.706
Medium	FQRGNDVAF	1	1	1	P17931		0	1.53387e+06	0.03	0.1353	2.30285	2	1053.51	-0.457056	39.4036	0	C1203	40.74	B1503	0.0058
Medium	EVGPPLPPLL	1	1	1	Q9Y2F5		0	700463	0.03	0.1353	2.03743	2	1031.61	-0.283489	85.4121	0	C1203	42.86	A6802	0.7259
Medium	RGFGFVTY	2	3	3	Q32P51;P09651;P51991		0	4.31273e+06	0.03	0.134	1.90667	2	946.478	-0.220214	56.2424	0	C1203	33.33	B1503	0.7393
Medium	EAMKQILGV	2	1	1	Q14444		0	2.6622e+06	0.031	0.1371	2.35877	2	988.549	-0.218765	52.0877	0	C1203	81.48	A6802	0.0393
Medium	EAELEKLSL	1	1	1	Q8WUX9		0	1.33197e+06	0.031	0.1387	2.25679	2	1031.56	0.20366	75.4808	0	C1203	77.78	A6802	6.3745
Medium	RKALERELY	1	1	1	P24928		0	676699	0.031	0.1372	2.02257	2	1177.67	-0.0700786	28.0572	0	C1203	40.74	B1503	0.1184
Medium	NAYPYCRTI	1	1	1	P48739		0	1.95377e+06	0.031	0.1386	1.8005	2	1100.52	-0.024163	44.1856	0	C1203	85.19	C1203	0.3833
Medium	QAYPEVRIV	1	1	1	Q08211		0	6.01658e+06	0.031	0.1387	1.43063	2	1074.59	0.13647	50.9275	0	C1203	92.59	C1203	0.1422
Medium	RKITTYVSF	2	1	1	Q9UPT9		0	5.00682e+06	0.031	0.1379	1.34256	2	1114.63	0.0956826	44.0075	0	C1203	33.33	B1503	0.0225
Medium	HTILIVEKV	3	1	1	Q8TD19		0	2.66734e+06	0.032	0.1439	2.24004	2	1051.65	-0.931191	43.8504	0	C1203	70.37	A6802	0.0187
Medium	AQRQDIAFAY	1	1	1	P07355		0	2.70304e+06	0.032	0.1456	2.19817	2	1182.59	-0.399142	47.6755	0	C1203	31.43	B1503	0.023
Medium	KQLFTLVEW	1	3	3	P19793;P28702;P48443		0	694663	0.032	0.1458	2.13876	2	1163.65	0.901437	73.7285	0	C1203	7.41	B1503	1.0132
Medium	GKRPGGSTF	2	1	1	O15399		0	843605	0.032	0.1426	2.0143	2	906.479	-0.209376	18.9327	0	C1203	40.74	B1503	0.0145
Medium	AKFKSSIY	1	1	1	Q9Y6V7		0	1.2245e+06	0.032	0.1471	2.01263	2	943.525	-0.198795	28.7468	0	C1203	40	B1503	0.3481
Medium	NAFSANLNF	1	1	1	P98082		0	1.77331e+06	0.032	0.1409	2.00933	2	997.474	0.052349	60.1588	0	C1203	77.78	C1203	0.1976
Medium	QKYISNPLL	2	1	1	Q9BWV7		0	9.93993e+06	0.032	0.1442	2.00555	2	1075.61	-0.66204	39.4028	0	C1203	40.74	B1503	1.119
Medium	KHYEDNCISY	1	1	1	Q86UB9		0	543191	0.032	0.1439	1.80941	2	1271.54	0.422632	32.5288	0	C1203	34.29	B1503	0.1091
Medium	RQADFVQVL	3	1	1	Q9Y2V7		0	1.305e+07	0.032	0.146	1.79628	2	1075.59	-0.790873	53.9025	0	C1203	51.85	B1503	0.0104
Medium	RKDPRQIFF	1	1	1	Q9P015		0	2.69902e+06	0.032	0.144	1.7917	2	1206.67	-0.117211	39.6608	0	C1203	40.74	B1503	0.0765
Medium	KKGKEIIEY	1	1	1	Q92503		0	335241	0.032	0.1401	1.77711	2	1107.64	-0.18842	25.6039	0	C1203	48.15	B1503	0.0879
Medium	HKAPAFLY	3	1	1	Q8WVX9		0	1.37445e+06	0.032	0.1411	1.67536	2	946.514	-0.0944564	37.9983	0	C1203	30	B1503	0.6349
Medium	RKVKNSQSF	2	1	1	P54920		0	374849	0.032	0.1404	1.65417	2	1093.61	-0.164333	17.2963	0	C1203	29.63	B1503	0.0094
Medium	FKIFPLLGL	1	1	1	Q9H9E3		0	305921	0.032	0.146	1.65201	2	1047.66	-0.0854491	91.7731	0	C1203	44.44	C1203	1.6112
Medium	AHWVTHTSY	1	1	1	Q9BY42		0	181186	0.032	0.1414	1.62789	2	1101.51	-0.400826	30.873	0	C1203	40.74	B1503	0.0865
Medium	QQIGKVVQVY	1	2	2	Q9UNX3;P61254		0	251561	0.032	0.1441	1.51113	2	1161.66	-0.968163	25.1158	0	C1203	40	B1503	0.1189
Medium	RAVALSLLLY	1	1	1	Q8IY34		0	4.98309e+06	0.033	0.152	2.2368	2	1118.69	-0.0790806	49.661	0	C1203	60	B1503	3.2572
Medium	KLFVGGLSF	1	1	1	Q14011		0	555082	0.033	0.1482	2.13414	2	967.561	-0.228012	69.0968	0	C1203	37.04	B1503	0.0119
Medium	ISPSLNVSL	1	1	1	P03891		0	2.36642e+06	0.033	0.149	1.92494	2	929.53	-0.461034	66.8467	0	C1203	74.07	C1203	0.7299
Medium	GKTSLVQRY	2	1	1	O14966		0	267266	0.033	0.1499	1.91751	2	1051.59	-0.789904	26.6969	0	C1203	44.44	B1503	0.3972
Medium	DVIDImENL	1	1	1	P41279	M6(Oxidation)	0	291183	0.033	0.1496	1.91555	2	1077.51	-0.192274	93.2308	0	C1203	40.74	A6802	0.0133
Medium	PQYQTWEEF	2	1	1	P49458		0	3.04312e+06	0.033	0.1484	1.85307	2	1227.53	0.259643	66.073	0	C1203	37.04	B1503	0.9741
Medium	KAYSHPRSL	1	1	1	Q9BUY5		0	161216	0.033	0.1513	1.79195	2	1058.57	-0.611552	18.9395	0	C1203	88.89	C1203	0.0043
Medium	ETAKLIEKL	2	1	1	P13639		0	8.09526e+07	0.034	0.156	1.99669	2	1044.63	-0.642563	39.1046	0	C1203	74.07	A6802	0.0498
Medium	RAFVHWYV	2	6	6	Q71U36;P68363;Q9BQE3;Q13748;P68366;Q9NY65		0	1.96207e+07	0.034	0.1548	1.74985	2	1077.56	-0.318962	50.3272	0	C1203	80	C1203	6.4415
Medium	GKISKQEAY	1	1	1	P20936		0	116735	0.034	0.1555	1.61457	2	1023.55	-0.763154	19.5331	0	C1203	40.74	B1503	0.1051
Medium	AQLERQLQF	1	1	1	Q6P1N0		0	728502	0.034	0.1548	1.59084	2	1132.61	-0.0828683	48.7997	0	C1203	40.74	B1503	0.0059
Medium	KQFKSEAY	1	1	1	Q03001		0	336117	0.034	0.153	1.56986	2	1000.51	-0.0380568	20.4918	0	C1203	33.33	B1503	0.0268
Medium	AKQPHVGDY	1	1	1	Q06323		0	236821	0.034	0.1546	1.46853	2	1014.5	-0.0587093	23.2688	0	C1203	51.85	B1503	0.152
Medium	YKIYPGHGRRY	1	1	1	P83731		0	1.18571e+06	0.034	0.155	1.40808	3	1409.74	-0.378511	25.1549	0		0	B1503	1.1484
Medium	KQASGNIVY	1	1	1	Q16666		0	600214	0.035	0.1591	2.35702	2	979.521	-0.0130505	29.5196	0	C1203	51.85	B1503	0.0031
Medium	RKQIFILLF	1	1	1	P55060		0	8.58589e+06	0.035	0.1569	1.60132	2	1177.75	-0.188813	71.1852	0	C1203	37.04	B1503	0.4431
Medium	GKHQPHKVTQY	2	2	2	P83881;Q969Q0		0	5.21153e+06	0.036	0.1627	2.31644	3	1322.7	0.594939	17.382	0		0	B1503	1.4107
Medium	DASEIQVQV	1	1	1	P18858		0	667120	0.036	0.1616	2.26775	2	988.494	-0.86022	57.3009	0	C1203	85.19	A6802	0.0625
Medium	AAYQSVRIL	2	1	1	Q9HAT2		0	4.32635e+06	0.036	0.1604	2.18317	2	1020.58	-0.742673	48.7065	0	C1203	88.89	C1203	0.0263
Medium	VVKPPGSSL	1	1	1	Q92560		0	1.26923e+06	0.036	0.1616	2.14153	2	883.525	0.110475	34.8003	0	C1203	48.15	C1203	0.0379
Medium	RVAGIHKKV	1	1	1	P26373		0	1.50575e+06	0.036	0.1645	2.06581	2	1007.65	-0.0465484	17.3669	0	C1203	48.15	C1203	0.7519
Medium	EIYKEFFEV	2	1	1	O00255		0	2.12819e+06	0.036	0.1631	1.74878	2	1203.59	0.34416	67.4433	0	C1203	44.44	A6802	0.0283
Medium	YAFPRIFIP	1	1	1	Q8TD30		0	1.75979e+06	0.036	0.1616	1.53086	2	1123.63	0.00810876	77.1162	0	C1203	55.56	C1203	1.8167
Medium	IFIDISLNI	1	1	1	Q7RTR8		0	6.22292e+06	0.037	0.1673	2.25833	2	1047.61	0.161202	68.9574	0	C1203	37.04	C1203	1.0547
Medium	ESIRFFVNV	1	1	1	Q8NBS3		0	1.78173e+06	0.037	0.1694	2.23609	2	1110.59	0.123043	67.5721	0	C1203	70.37	A6802	0.0572
Medium	GAYEQVIKY	1	1	1	P98194		0	3.31231e+06	0.037	0.1662	2.21633	2	1070.55	-0.140142	46.0547	0	C1203	88.89	C1203	0.0474
Medium	ELSNVLAAM	1	1	1	Q9Y3U8		0	958248	0.037	0.1661	2.14461	2	947.487	-0.0859491	71.1019	0	C1203	33.33	A6802	0.4543
Medium	AATEIVERV	1	1	1	Q9UID3		0	851910	0.037	0.1678	2.07047	2	987.547	-0.193177	39.7679	0	C1203	85.19	A6802	0.27
Medium	EAWRLFLLL	1	1	1	A0AVI4		0	3.13304e+06	0.037	0.1672	2.04818	2	1160.68	-0.13663	80.4753	0	C1203	77.78	A6802	1.7331
Medium	FTTNRLKEF	1	1	1	Q15772		0	4.1677e+06	0.037	0.1685	1.97926	2	1155.62	-0.071923	39.7631	0	C1203	70.37	C1203	0.3437
Medium	KKIGDEYFTF	1	1	1	P49368		0	1.25684e+06	0.037	0.1653	1.87856	2	1247.63	-0.332372	51.5838	0	C1203	31.43	B1503	0.3597
Medium	RKHGLEVIY	1	1	1	P07900		0	688049	0.037	0.1682	1.45366	2	1114.64	-0.241417	32.7583	0	C1203	44.44	B1503	0.0281
Medium	SVLEmLDSL	1	1	1	Q9P225	M5(Oxidation)	0	5.39632e+06	0.038	0.1752	2.77861	2	1022.5	-3.70325	82.131	0	C1203	40.74	C1203	0.4049
Medium	HAVEWPVVm	2	1	1	Q13535	M9(Oxidation)	0	3.20834e+06	0.038	0.1719	2.18766	2	1083.53	-0.0128253	57.5104	0	C1203	81.48	C1203	0.021
Medium	RKRPVPKGATY	1	1	1	P61313		0	1.70197e+06	0.038	0.1715	2.00142	3	1272.75	0.481824	18.8826	0		0	B1503	0.1749
Medium	EVSKAIINI	1	1	1	Q9NXP7		0	3.33442e+06	0.038	0.1765	1.84275	2	986.588	-0.0618353	51.1085	0	C1203	40.74	A6802	0.0225
Medium	DAANVLLQL	1	1	1	Q7Z6Z7		0	586009	0.038	0.172	1.82171	2	956.541	-0.0491783	82.6485	0	C1203	81.48	A6802	0.2502
Medium	ETFMNRVEV	1	1	1	Q9UBU8		0	928040	0.038	0.1763	1.51191	2	1124.54	-0.0697421	50.1349	0	C1203	77.78	A6802	0.0169
Medium	ISLSLLSQL	1	1	1	Q9Y5R4		0	1.19236e+06	0.039	0.1778	2.28177	2	973.593	-0.104046	82.215	0	C1203	70.37	C1203	0.8702
Medium	KKPESFFTQF	1	1	1	Q9UBE0		0	2.40578e+06	0.039	0.1779	1.96799	2	1258.65	0.738337	51.0802	0	C1203	28.57	B1503	1.4103
Medium	HQKKEFVKY	1	1	1	Q9BUL8		0	490626	0.039	0.1813	1.62642	3	1206.66	0.52839	19.9318	0	C1203	40.74	B1503	0.0105
Medium	KKWKGEIQEF	1	1	1	P61587		0	549435	0.039	0.1775	1.60191	2	1292.7	-0.138269	33.044	0	C1203	37.14	B1503	0.212
Medium	LKNGALVVY	1	1	1	Q8IVB5		0	1.46056e+06	0.04	0.1884	2.29382	2	976.582	-0.190706	45.4446	0	C1203	48.15	B1503	0.0273
Medium	DSFNYFINV	1	1	1	Q9NW08		0	775912	0.04	0.1859	2.15037	2	1118.51	-0.349681	85.2206	0	C1203	74.07	A6802	0.0663
Medium	EAIGNPHHV	1	1	1	Q14146		0	476135	0.04	0.191	2.08587	2	973.485	-0.259367	21.0117	0	C1203	81.48	A6802	0.0442
Medium	DSSEIHFKV	1	1	1	P63165		0	2.79229e+06	0.04	0.1897	2.0779	2	1061.53	-0.0665592	42.1901	0	C1203	74.07	A6802	0.0528
Medium	KIYEEPIIL	1	1	1	Q9Y620		0	1.86298e+06	0.04	0.1917	1.97136	2	1117.65	-0.495171	60.6802	0	C1203	51.85	C1203	0.1338
Medium	SKGIVVTAY	1	1	1	P15121		0	649109	0.04	0.1887	1.96739	2	937.535	-0.0815074	40.9284	0	C1203	40.74	B1503	0.0789
Medium	ALRKSEIEY	1	1	1	P62888		0	2.59261e+06	0.04	0.1912	1.94048	2	1108.6	-0.516514	29.1315	0	C1203	48.15	B1503	0.3117
Medium	EVVHKIIEL	1	1	1	P42224		0	1.41644e+06	0.04	0.1837	1.92969	2	1079.65	-0.83747	46.0157	0	C1203	48.15	A6802	0.0575
Medium	RQLPSSHAL	1	1	1	Q8WV83		0	2.81538e+06	0.04	0.1888	1.87558	2	1008.56	-0.0823519	27.0653	0	C1203	44.44	B1503	0.015
Medium	TVAQIKATV	1	1	1	Q8IXM2		0	789233	0.04	0.1852	1.84003	2	930.562	0.0386295	36.6734	0	C1203	44.44	A6802	0.0147
Medium	HTWWPPFRV	1	1	1	Q03468		0	1.96644e+06	0.04	0.1846	1.67856	2	1225.63	-0.0480224	64.608	0	C1203	70.37	A6802	0.04
Medium	FVEWIPNNV	1	8	8	Q9H4B7;Q13885;Q9BVA1;Q13509;P04350;P68371;P07437;Q9BUF5		0	2.5401e+06	0.04	0.1869	1.60462	2	1117.57	0.613541	75.3311	0	C1203	44.44	A6802	0.1248
Medium	AKFGNKEEY	1	1	1	Q9UJF2		0	333000	0.04	0.1877	1.50048	2	1085.53	-0.289993	22.7757	0	C1203	51.85	B1503	0.0282
Medium	AKAPFAAHGY	2	1	1	P49721		0	1.65419e+06	0.041	0.1955	2.26506	2	1032.53	-0.0103187	30.7649	0	C1203	34.29	B1503	0.2206
Medium	QKKDTGHVY	1	1	1	Q15208		0	447703	0.041	0.1948	1.86797	2	1075.55	-0.646679	16.8494	0	C1203	44.44	B1503	0.0992
Medium	YKAPILLAL	1	1	1	O60341		0	1.14049e+06	0.042	0.199	2.37147	2	1001.64	-0.578807	70.3577	0	C1203	55.56	B1503	0.1787
Medium	KKSEGSLAY	1	1	1	Q96KP1		0	457134	0.042	0.1986	2.27253	2	982.52	-0.29835	21.4224	0	C1203	48.15	B1503	0.0093
Medium	HAFWGGSVV	2	1	1	O75179		0	1.85873e+07	0.042	0.1987	1.85555	2	959.473	-0.175237	54.4078	0	C1203	81.48	C1203	0.0458
Medium	HTSPLTQIRL	1	1	1	Q96BP3		0	2.80712e+06	0.042	0.2001	1.75025	2	1165.67	-0.585828	47.4052	0	C1203	51.43	A6802	0.5137
Medium	DLSNIINKL	1	1	1	Q9GZL7		0	0	0.043	0.2031	2.21115	2	1029.59	-0.604105	71.0644	0	C1203	44.44	A6802	0.4715
Medium	FLPPCAQLL	1	1	1	O75843		0	2.98337e+06	0.043	0.2046	2.20599	2	1001.55	-0.2693	89.1457	0	C1203	48.15	C1203	1.3807
Medium	KQHVTEAF	1	1	1	O43175		0	406317	0.043	0.2042	2.0275	2	959.494	-0.749653	24.633	0	C1203	30	B1503	0.1325
Medium	SVDSFQIIL	1	1	1	Q5VWP2		0	1.13612e+07	0.043	0.2049	1.96683	2	1021.56	-0.0961788	73.6944	0	C1203	44.44	C1203	0.9481
Medium	RQPDSPTALY	1	1	1	Q9BQG0		0	2.38276e+06	0.043	0.2034	1.90603	2	1147.57	-0.093259	40.3056	0	C1203	34.29	B1503	0.0394
Medium	EVNKVISSV	2	1	1	Q93008		0	4.12282e+06	0.044	0.2058	2.1448	2	974.552	-0.237098	37.6133	0	C1203	40.74	A6802	0.0091
Medium	HKGRGQLVY	1	1	1	Q9BX59		0	1.58794e+06	0.044	0.2085	1.78903	2	1057.59	-0.149284	21.3595	0	C1203	44.44	B1503	0.1691
Medium	HSAEILAEI	1	1	1	Q6FI81		0	4.25264e+07	0.044	0.2061	1.74531	2	982.52	-0.0600438	53.7461	0	C1203	70.37	A6802	0.018
Medium	SQVPRSSSM	1	1	1	Q9H992		0	166659	0.044	0.2072	1.67228	2	978.467	0.0434252	23.7185	0	C1203	37.04	B1503	0.0134
Medium	RAFDQKLIF	1	1	1	Q8TDB6		0	1.77989e+06	0.044	0.2074	1.56191	2	1137.64	-0.0300702	51.4697	0	C1203	77.78	C1203	0.0141
Medium	KKLQQTQEY	1	2	2	P42229;P51692		0	214000	0.044	0.2096	1.46479	2	1165.62	0.0618718	19.5756	0	C1203	40.74	B1503	0.0331
Medium	KEKPVCGTTY	1	1	1	Q14444		0	183408	0.044	0.2098	1.31911	2	1125.56	-0.389936	23.6638	0	C1203	34.29	B1503	0.0985
Medium	KLIDVTNIY	1	1	1	Q6P0N0		0	1.01975e+07	0.045	0.2139	2.23837	2	1078.61	-0.241077	53.4196	0	C1203	40.74	B1503	0.0262
Medium	SISQVIEQL	1	1	1	Q12888		0	1.08765e+06	0.045	0.2144	1.87868	2	1016.56	-0.408325	72.499	0	C1203	44.44	A6802	0.4023
Medium	RQSPHSNLF	1	1	1	O43929		0	407793	0.045	0.2132	1.56243	2	1085.55	-0.851376	28.1999	0	C1203	40.74	B1503	0.0019
Medium	KKVSKAAIL	1	1	1	O00767		0	410838	0.045	0.2134	1.06221	2	957.646	-0.0270337	21.4634	0	C1203	40.74	B1503	0.7511
Medium	KKKKDPETY	1	1	1	Q3B726		0	27129.4	0.045	0.2143	1.01523	2	1136.63	-0.332973	16.4379	0	C1203	44.44	B1503	0.1214
Medium	QQKAFILDL	1	1	1	Q9H015		0	6.00154e+06	0.046	0.2189	2.38833	2	1075.61	-0.794123	39.3403	0	C1203	44.44	B1503	0.9811
Medium	LRNQLQSVY	1	1	1	Q9BSM1		0	5.80524e+06	0.046	0.2161	2.04914	2	1120.61	-1.15523	38.3481	0	C1203	40.74	B1503	0.1483
Medium	KRNLNPVF	1	1	1	Q8IYJ3		0	456095	0.046	0.2198	2.01097	2	987.574	0.125218	31.1688	0	C1203	40	B1503	1.3791
Medium	RKLTELTQLY	1	1	1	Q9BWW8		0	3.9501e+06	0.046	0.2209	1.90547	2	1264.73	0.674406	48.3864	0	C1203	31.43	B1503	0.5932
Medium	MVSSIIEQL	1	1	1	Q96HR8		0	1.40471e+06	0.046	0.22	1.89253	2	1019.54	-0.154337	72.3915	0	C1203	48.15	A6802	0.0235
Medium	KKDPSQPFY	1	1	1	Q96EU7		0	447385	0.046	0.2197	1.88711	2	1109.56	-0.17644	29.8879	0	C1203	44.44	B1503	0.1948
Medium	VAKGGLGLI	1	1	1	O75832		0	1.43637e+06	0.046	0.2199	1.87159	2	827.535	0.0597477	44.1514	0	C1203	74.07	C1203	1.1346
Medium	HQYPGRGVY	1	1	1	Q9H3P7		0	494472	0.046	0.2177	1.83172	2	1076.53	-0.522396	26.6115	0	C1203	51.85	B1503	0.0011
Medium	RAFDQGADAIY	1	1	1	Q9UDW1		0	2.19882e+06	0.046	0.2169	1.79606	2	1226.58	-0.560908	45.9601	0		0	B1503	0.8623
Medium	VQCLYTSSAF	1	1	1	O75376		0	819797	0.046	0.221	1.67231	2	1118.52	-0.0885222	96.1183	0	C1203	31.43	B1503	0.5194
Medium	AQHLFIQTF	1	1	1	Q14684		0	1.03472e+06	0.047	0.2231	2.44323	2	1104.58	-0.244144	59.8309	0	C1203	40.74	B1503	0.0085
Medium	KAIKTSDI	1	1	1	Q8IXW5		0	849042	0.047	0.2243	2.27365	2	875.52	0.766408	35.7193	0	C1203	63.33	C1203	8.6857
Medium	AKLKGIGEY	1	1	1	Q92620		0	1.03962e+06	0.047	0.2239	2.25783	2	978.562	-0.0256376	31.4003	0	C1203	48.15	B1503	0.0283
Medium	TAFSRLILIL	1	1	1	Q6P2Q9		0	3.14467e+06	0.047	0.2228	1.90325	2	1146.72	0.189883	82.4684	0	C1203	68.57	C1203	3.207
Medium	KKIRTSPTF	1	1	1	P62750		0	878492	0.047	0.2235	1.7451	2	1077.64	-0.475567	23.7516	0	C1203	33.33	B1503	0.0145
Medium	SKHRAQVIY	1	1	1	P62851		0	536506	0.047	0.2221	1.59316	2	1101.62	-0.997922	21.2318	0	C1203	40.74	B1503	0.0587
Medium	ARAVGSVTVY	1	1	1	Q8TEM1		0	74558.2	0.047	0.2251	1.45522	2	1022.56	-0.165819	19.7476	0	C1203	42.86	B1503	0.1118
Medium	KLYQEIISY	1	1	1	Q9H7D0		0	1.7181e+06	0.048	0.228	2.25925	2	1156.62	-0.691896	55.7197	0	C1203	48.15	B1503	0.0145
Medium	AQRQDIAF	1	1	1	P07355		0	2.66067e+06	0.048	0.2279	2.16338	2	948.49	-0.20107	36.8806	0	C1203	26.67	B1503	0.0753
Medium	KKEGGTVVY	1	1	1	P49419		0	369985	0.048	0.2297	2.03973	2	980.541	-0.100023	20.8775	0	C1203	48.15	B1503	0.0277
Medium	RKKDLNAYL	1	1	1	Q9Y5W8		0	303029	0.048	0.228	2.01942	2	1120.65	0.0224566	18.5973	0	C1203	40.74	B1503	0.5741
Medium	RAYDGTTYL	1	1	1	Q53GS9		0	1.59079e+06	0.048	0.2284	1.98385	2	1059.51	-0.830711	41.0623	0	C1203	81.48	C1203	0.0009
Medium	VTIENHPHL	1	1	1	Q9NT62		0	1.11497e+06	0.048	0.2293	1.82134	2	1059.56	-1.77365	84.7934	0	C1203	74.07	C1203	0.1195
Medium	AGHLSTAQY	1	1	1	Q04637		0	925787	0.048	0.2289	1.76838	2	947.458	-0.283912	27.9017	0	C1203	40.74	B1503	0.6529
Medium	FASEYPLIL	1	1	1	Q9UPR0		0	1.44557e+06	0.048	0.2303	1.68848	2	1052.57	0.0194557	81.9353	0	C1203	92.59	C1203	0.0334
Medium	DAANVMVYV	1	1	1	Q9Y4C1		0	990866	0.049	0.2329	2.23036	2	981.471	-0.171687	70.6474	0	C1203	81.48	A6802	0.0105
Medium	HKNKVTMTF	1	1	1	Q16878		0	2.11611e+06	0.049	0.2319	1.99299	2	1105.58	-3.31086	40.0249	0	C1203	33.33	B1503	0.0096
Medium	SVIGGNLTGIFI	1	1	1	Q9BXL6		0	964560	0.049	0.2334	1.9011	2	1190.68	-0.192601	89.3181	0		0	A6802	1.8764
Medium	SQDPGTHVV	1	1	1	Q9H8H0		0	943604	0.049	0.2342	1.82993	2	939.453	-0.0870791	25.7926	0	C1203	48.15	B1503	0.7661
Medium	FAMTNQIL	1	1	1	P31327		0	806779	0.049	0.2315	1.61136	2	937.481	-0.0902415	66.9248	0	C1203	83.33	C1203	1.5429
Medium	QKAPDGKSY	1	1	1	Q9HBL8		0	230043	0.049	0.2332	1.59028	2	993.5	-0.219267	17.682	0	C1203	51.85	B1503	0.1579

## Sheet: Statistics
Total_Peptides	Tool	A*68:02	B*15:03	C*12:03
1356	Total Syfpeithi allelecoverage with threshold	0	0	338
	Total Syfpeithi allelecoverage with threshold %	0.0000	0.0000	0.2493
	Total NetMHC allelecoverage with threshold	0	0	0
	Total NetMHC allelecoverage with threshold %	0.0000	0.0000	0.0000
	Total NetMHC allelecoverage with 50nM threshold	0	0	0
	Total NetMHC allelecoverage with 50nM threshold %	0.0000	0.0000	0.0000
	Best Syfpeithi	0	0	1280
	Best Syfpeithi %	0.0000	0.0000	0.9440
	Best NetMHC	0	0	0
	Best NetMHC %	0.0000	0.0000	0.0000
	Best Syfpeithi with threshold	0	0	338
	Best Syfpeithi with threshold %	0.0000	0.0000	0.2493
	Best NetMHC with threshold	0	0	0
	Best NetMHC with threshold %	0.0000	0.0000	0.0000
	Best NetMHC with 50nM threshold	0	0	0
	Best NetMHC with 50nM threshold %	0.0000	0.0000	0.0000
