# Supplementary material for: TAPBPR mediates peptide dissociation from MHC class I using a leucine lever
Source: eLife. 2018 Nov 28;7:e40126. doi: 10.7554/eLife.40126 (PMC6307860; doi:10.7554/eLife.40126)
Supplement: Figure 5—source data 12. [file elife-40126-fig5-data12.xlsx]

## Sheet: Filteredpeptides
A6	Sequence	# PSMs	# Proteins	# Protein Groups	Protein Group Accessions	Modifications	ΔCn	Area	q-Value	PEP	XCorr	Charge	MH+ [Da]	ΔM [ppm]	RT [min]	# Missed Cleavages	best_Syf_Allele	best_Syf_Score	best_NetMHC_Allele_Rank	best_NetMHC_Rank
High	SKLPIGDVATQY	5	1	1	Q99832		0	9.08327e+06	0	2.40893e-29	4.57352	2	1291.69	-0.31039	54.7083	0		0	B1503	1.2346
High	KKFFGEFTGF	26	1	1	Q15029		0	6.12315e+07	0	4.932e-14	4.21635	2	1207.61	-0.412349	57.3574	0	C1203	42.86	B1503	0.4285
High	GQYGNPLNKY	22	1	1	O14672		0	9.67956e+07	0	1.508e-19	4.09799	2	1153.56	-0.339192	40.4517	0	C1203	34.29	B1503	0.0242
High	IAAVIARFY	6	1	1	P40305		0	6.0338e+06	0	8.113e-16	3.96443	2	1023.6	-1.25407	61.5811	0	C1203	81.48	C1203	0.4494
High	KLFGSTSSF	26	1	1	P08174		0	8.505e+07	0	1.225e-15	3.88845	2	973.499	-0.451547	47.9107	0	C1203	37.04	B1503	0.0127
High	KKLEELEQKY	10	1	1	P42224		0	9.44616e+06	0	3.52e-19	3.88243	3	1307.72	0.181637	27.0253	0	C1203	31.43	B1503	0.9868
High	IGVDFALKV	13	2	2	Q13637;P57729		0	2.00251e+07	0	2.442e-13	3.84084	2	961.571	-0.43121	67.9276	0	C1203	44.44	C1203	1.1246
High	AKLPFTPLSY	4	1	1	Q9UM00		0	9.32859e+06	0	7.264e-13	3.83845	2	1136.63	-0.325651	66.7698	0	C1203	48.57	B1503	0.0699
High	YGYDNVKEY	6	1	1	Q96GN5		0	8.63922e+06	0	1.003e-15	3.80552	2	1150.51	0.135003	40.0042	0	C1203	59.26	C1203	0.0081
High	KQFPEVIKY	17	1	1	Q9UIF9		0	4.40073e+07	0	3.7e-14	3.76052	2	1151.65	-0.14045	43.4974	0	C1203	55.56	B1503	0.0014
High	AAYSDGYGRVY	9	1	1	O43251		0	5.90813e+06	0	3.441e-21	3.73654	2	1221.55	0.310512	40.8369	0		0	B1503	1.0068
High	YAYDGKDYIAL	23	17	17	P01892;P30447;P05534;P10316;P01889;P30460;Q04826;P30479;P30480;P30486;P18464;P30490;P30498;Q31610;P30499;P04222;P17693		0	5.83441e+07	0	7.278e-21	3.72463	2	1291.62	-0.276021	60.0398	0		0	C1203	0.4676
High	ALIEFIRSEY	26	1	1	P26639		0	1.44269e+08	0	1.851e-17	3.71503	2	1240.66	-0.3832	68.0445	0	C1203	31.43	B1503	1.0203
High	FIYDSVKVY	9	1	1	Q00325		0	4.81302e+06	0	1.615e-13	3.70057	2	1133.59	-0.490036	60.0689	0	C1203	59.26	C1203	0.0117
High	VKVPTTLAEY	2	2	2	P49427;Q712K3		0	2.30167e+06	0	8.698e-10	3.6927	2	1120.62	-0.187317	52.0857	0	C1203	34.29	B1503	0.232
High	EVFEDAAEIRL	9	1	1	P19338		0	9.10225e+06	0	2.719e-20	3.69046	2	1291.65	-0.229017	66.567	0		0	A6802	0.803
High	FSFDYIVKW	6	1	1	Q9BSJ2		0	7.31057e+06	0	2.629e-13	3.68342	2	1204.6	0.139577	81.6071	0	C1203	48.15	C1203	0.2257
High	KAYFDVKEY	10	1	1	Q9UJX2		0	9.12146e+06	0	1.312e-13	3.67704	2	1162.58	-0.107444	40.9855	0	C1203	88.89	C1203	0.0916
High	TTYEGIFKTL	15	1	1	Q8WWM7		0	2.31096e+07	0	3.151e-18	3.67697	2	1172.62	-0.106424	63.3978	0	C1203	54.29	A6802	0.1132
High	YCAEIAHNV	13	1	1	P62910		0	1.51825e+07	0	4.025e-15	3.6593	2	1019.46	-0.466095	37.9903	0	C1203	48.15	A6802	0.1841
High	VGVDFALKV	12	1	1	O14966		0	1.49479e+07	0	1.588e-10	3.63716	2	947.556	-0.282377	64.0264	0	C1203	48.15	C1203	1.2819
High	GKSPLFGQYF	6	1	1	Q5VT66		0	2.55547e+06	0	6.319e-12	3.63375	2	1143.58	-0.48097	64.3749	0	C1203	37.14	B1503	0.6991
High	YKIGDLTGY	12	1	1	Q9NVN8		0	7.57959e+07	0	1.019e-10	3.6291	2	1029.52	-1.50956	54.7885	0	C1203	44.44	B1503	0.0506
High	AAASAIKVI	8	1	1	P14902		0	3.71708e+06	0	5.825e-09	3.62343	2	843.53	-0.0575498	41.6902	0	C1203	88.89	C1203	0.427
High	RQYGSEGRFTF	8	2	2	Q7Z7H5;Q9BVK6		0	1.2116e+07	0	8.281e-09	3.61718	3	1347.64	-0.425938	39.6071	0		0	B1503	0.1337
High	KLVDFVIHF	13	1	1	P59998		0	3.29795e+07	0	4.75e-13	3.61149	2	1117.64	0.817544	69.4859	0	C1203	40.74	B1503	0.1146
High	KKPITTGGVTY	10	1	1	Q14192		0	9.0914e+06	0	1.352e-17	3.60751	2	1164.66	-0.472701	27.9856	0		0	B1503	0.9535
High	AKYPHVEDY	18	1	1	P61289		0	1.97532e+07	0	3.189e-14	3.60281	2	1121.53	-0.371695	31.1018	0	C1203	55.56	B1503	0.0063
High	FAIDPHLLLSV	18	1	1	Q29RF7		0	7.23456e+07	0	3.121e-20	3.57938	2	1224.7	-0.368673	87.7888	0		0	A6802	1.1874
High	HKFPDEDSY	17	1	1	Q6VY07		0	2.11019e+07	0	6.239e-16	3.57481	2	1137.48	-0.190447	31.0322	0	C1203	48.15	B1503	0.1563
High	GKITDFIKF	8	1	1	P62701		0	2.0966e+07	0	8.974e-08	3.57102	2	1068.61	-0.731301	60.7224	0	C1203	33.33	B1503	0.0648
High	NAYDFIMKL	8	1	1	P08183		0	3.58637e+07	0	2.755e-10	3.56033	2	1114.56	-0.295406	75.6371	0	C1203	85.19	C1203	0.0092
High	IKISEGTGF	1	1	1	Q9Y2R4		0	2.42669e+06	0	2.733e-08	3.55531	2	951.515	-0.113891	45.3932	0	C1203	33.33	B1503	0.0238
High	IATSQNRIY	6	1	1	Q99623		0	5.02823e+06	0	2.011e-06	3.55417	2	1065.57	-0.561641	32.4133	0	C1203	81.48	B1503	1.1557
High	RAFEYEIRF	19	1	1	O60566		0	7.44022e+07	0	2.267e-07	3.5526	3	1230.63	0.909224	54.5254	0	C1203	77.78	B1503	0.0486
High	ETADVIAKVAF	5	1	1	O43617		0	3.42025e+06	0	2.17e-15	3.54975	2	1163.63	-0.373553	62.6541	0		0	A6802	1.3198
High	KKGPSGYGF	11	1	1	O14745		0	1.40293e+07	0	7.014e-07	3.53749	2	940.488	-0.492815	25.6036	0	C1203	37.04	B1503	0.0927
High	KKHSQFIGY	24	4	4	Q58FF7;Q58FG0;P07900;P08238		0	4.10142e+07	0	1.333e-11	3.53159	2	1107.59	-0.487147	24.0245	0	C1203	44.44	B1503	0.0501
High	NVPEGLLATVTV	8	5	5	P54707;P05023;P50993;P13637;Q13733		0	1.63989e+07	0	2.348e-05	3.51795	2	1212.68	-0.480235	81.4108	0		0	A6802	0.9815
High	FVNDIFERI	265	14	14	P33778;P62807;P58876;Q93079;P06899;O60814;Q99880;Q99879;Q99877;P23527;Q16778;Q5QNW6;Q8N257;P57053		0	3.23044e+09	0	2.629e-10	3.50639	2	1152.6	-0.261593	70.7679	0	C1203	37.04	A6802	0.0163
High	GKKLFGEGY	8	1	1	Q92624		0	2.70064e+06	0	6.115e-08	3.50252	2	998.531	0.147199	32.4637	0	C1203	37.04	B1503	0.5297
High	YQADIERmY	17	1	1	O95573	M8(Oxidation)	0	4.08848e+06	0	2.597e-14	3.50141	2	1204.53	-0.012672	42.1169	0	C1203	51.85	B1503	0.0096
High	SKIAGILHY	4	1	1	P14735		0	3.3846e+06	0	5.034e-09	3.49182	2	1001.58	-0.247627	42.2953	0	C1203	44.44	B1503	0.0072
High	KQIESKTAF	17	1	1	P10599		0	1.40161e+07	0	4.275e-10	3.49126	2	1051.58	-0.335536	22.6951	0	C1203	33.33	B1503	0.0018
High	KAFQKIVVL	56	2	2	Q7L1Q6;Q9Y6E2		0	6.17412e+08	0	0.00265	3.48999	2	1045.68	-1.12322	44.1108	0	C1203	88.89	C1203	0.0077
High	RKFPAGKVPAF	29	1	1	P26641		0	7.11782e+07	0	3.396e-16	3.48636	3	1217.72	-0.0621114	35.9635	0		0	B1503	0.1649
High	KSKDFVQVm	81	1	1	P78527	M9(Oxidation)	0	1.06442e+07	0	6.068e-13	3.47223	2	1097.57	-0.0462227	29.7655	0	C1203	70.37	C1203	0.0946
High	GKIFTFGSY	6	3	3	P51003;Q9NRJ5;Q9BWT3		0	4.24751e+06	0	1.053e-05	3.46984	2	1019.52	-1.3675	58.9312	0	C1203	37.04	B1503	0.3162
High	VKLPSGEDY	15	1	1	Q9Y2Z0		0	2.1236e+07	0	1.686e-11	3.45731	2	1007.5	-0.36266	41.4504	0	C1203	48.15	B1503	0.276
High	KHFGTILNY	20	2	2	Q13829;Q9H3F6		0	3.46909e+07	0	2.935e-06	3.45713	2	1092.58	-0.3494	43.1096	0	C1203	51.85	B1503	0.0317
High	VKVIQQESY	12	1	1	P60228		0	1.18516e+07	0	6.812e-10	3.4512	2	1093.59	-0.258529	35.1509	0	C1203	40.74	B1503	0.1997
High	IKYDPSIGIY	6	1	1	P62913		0	6.57075e+06	0	2.415e-15	3.44745	2	1168.62	-0.0666098	57.8634	0	C1203	42.86	B1503	0.0478
High	AKKISQLGY	10	1	1	P26196		0	6150831	0	1.925e-07	3.43918	2	1007.59	-0.378137	27.3259	0	C1203	44.44	B1503	0.2744
High	EAFQGTKVFV	11	1	1	P61289		0	1.40367e+07	0	2.506e-11	3.42978	2	1125.59	-0.669916	52.7795	0	C1203	68.57	A6802	0.1825
High	GKLPAGGVLY	9	1	1	P48634		0	1.06441e+07	0	2.262e-09	3.42844	2	974.567	-0.363593	47.6696	0	C1203	34.29	B1503	0.1953
High	GKIADRFLLY	5	1	1	P61968		0	8.91661e+06	0	7.45e-10	3.42664	2	1195.68	-0.326427	53.6488	0	C1203	31.43	B1503	0.7764
High	YKAAAGEDY	15	1	1	P23381		0	1.57753e+07	0	1.045e-10	3.41517	2	987.442	-0.258629	26.1282	0	C1203	44.44	B1503	0.2533
High	YQFTGIKKY	18	1	1	Q96IX5		0	5.81302e+07	0	4.129e-12	3.41478	2	1147.61	-0.399053	37.9466	0	C1203	51.85	B1503	0.0015
High	FTADFVRQL	11	1	1	Q96Q15		0	1.81781e+07	0	2.282e-10	3.41402	2	1096.58	-0.520502	61.9702	0	C1203	85.19	C1203	0.0142
High	VKYIQQENF	7	1	1	Q6PJF5		0	3.74752e+06	0	5.705e-15	3.41142	2	1168.6	-0.481438	42.8323	0	C1203	37.04	B1503	0.1248
High	RKYNELLKSY	13	1	1	P10909		0	1.14407e+07	0	2.623e-18	3.39984	3	1313.72	0.104167	32.0298	0	C1203	34.29	B1503	0.1027
High	SGFSGVIRL	13	1	1	P11309		0	2.51554e+07	0	1.091e-12	3.39865	2	935.53	-0.597766	58.498	0	C1203	51.85	C1203	0.15
High	SQFGGGSQY	14	1	1	O15371		0	2.69195e+07	0	0.0002094	3.39529	2	930.395	-0.220557	36.6992	0	C1203	44.44	B1503	0.0013
High	SAYGSVKAY	26	2	2	P07355;A6NMY6		0	8.25297e+07	0	5.943e-12	3.3862	2	945.467	-0.649119	31.7044	0	C1203	88.89	C1203	0.0083
High	SAISSVRLY	9	1	1	P42285		0	5.76796e+06	0	1.208e-15	3.38358	2	995.552	-0.246987	49.8195	0	C1203	85.19	C1203	0.0858
High	DVIRHYGEHV	5	1	1	Q9BQG0		0	2.41452e+06	0	3.768e-06	3.37724	3	1224.61	-0.172511	28.1036	0	C1203	25.71	A6802	1.0681
High	DLSNIINKL	7	1	1	Q9GZL7		0	10695853	0	5.639e-06	3.35929	2	1029.59	0.107265	72.6695	0	C1203	44.44	A6802	0.4715
High	GKVGGLLAF	17	1	1	P28340		0	4.91621e+07	0	5.12e-08	3.35679	2	861.519	-0.196975	59.1275	0	C1203	37.04	B1503	0.0193
High	AKAPPPVFY	9	1	1	Q16643		0	8.37175e+06	0	1.285e-06	3.35346	2	989.546	-0.00253636	45.4456	0	C1203	59.26	B1503	0.0077
High	GKLGFLASY	4	1	1	Q12772		0	1.23648e+07	0	2.017e-09	3.35036	2	955.525	-0.0151362	56.8532	0	C1203	40.74	B1503	0.0566
High	KKYGPKGYGY	8	2	2	P21291;Q16527		0	2.52858e+06	0	1.495e-12	3.34194	2	1160.61	-0.403841	21.3446	0	C1203	42.86	B1503	0.1239
High	NAANIFERL	13	2	2	Q9Y6D6;Q9Y6D5		0	19859029	0	4.031e-09	3.33835	2	1047.56	-1.11389	57.3688	0	C1203	77.78	A6802	0.1099
High	AKYESQTSF	8	1	1	Q9P0U4		0	4.25734e+06	0	4.379e-07	3.33366	2	1060.49	-0.49519	30.7146	0	C1203	40.74	B1503	0.0018
High	IKKEFDKKY	8	2	2	P63167;Q96FJ2		0	3.52526e+06	0	7.271e-10	3.3311	3	1198.68	0.303247	18.2152	0	C1203	44.44	B1503	0.2653
High	EVFRIGNVEI	10	1	1	P15927		0	1.49398e+07	0	1.106e-10	3.3152	2	1175.64	0.0459938	71.3612	0	C1203	20	A6802	0.2481
High	GKYIPKQSF	11	1	1	Q9P0I2		0	1.87311e+07	0	2.715e-09	3.31274	2	1067.59	-0.471227	30.057	0	C1203	33.33	B1503	0.022
High	GKVFATTGY	1	2	2	Q14957;O15399		0	1.49357e+06	0	1.381e-08	3.31238	2	943.488	-0.130883	37.3392	0	C1203	37.04	B1503	0.1564
High	IKLPSVTSF	7	1	1	P18858		0	3.74658e+06	0	3.638e-11	3.30978	2	991.582	-0.470553	63.4839	0	C1203	40.74	B1503	0.0047
High	RKFYKGKKY	21	1	1	P42766		0	2.60117e+07	0	0.001075	3.30577	3	1217.72	0.797761	15.9265	0	C1203	44.44	B1503	0.0393
High	YIKDFFEQm	12	1	1	Q5U649	M9(Oxidation)	0	4.52252e+06	0	5.878e-14	3.30029	2	1236.56	-0.289543	55.788	0	C1203	37.04	C1203	0.1321
High	FGFPGERTY	16	1	1	Q9Y4K0		0	1.08313e+08	0	1.942e-13	3.29693	2	1073.5	-1.76047	51.497	0	C1203	59.26	C1203	0.0252
High	AKAPFAAHGY	7	1	1	P49721		0	4.62744e+06	0	1.361e-10	3.29437	2	1032.53	-0.364994	28.9076	0	C1203	34.29	B1503	0.2206
High	GKYFSLEGY	4	1	1	E7ETH6		0	3.582e+06	0	1.21e-07	3.29374	2	1063.51	-0.40479	55.3185	0	C1203	40.74	B1503	0.2709
High	NKYLTAEAF	4	1	1	Q16658		0	7.59041e+06	0	3.477e-07	3.29279	2	1056.54	-0.0122656	48.0829	0	C1203	33.33	B1503	0.1519
High	TVFNFQEKV	8	1	1	Q14204		0	1.09331e+07	0	1.855e-10	3.29045	2	1111.58	-0.317424	53.5142	0	C1203	40.74	A6802	0.0273
High	RTTDIVIRI	19	1	1	Q9C0C9		0	5.52813e+07	0	0.002241	3.28615	2	1086.66	-1.1324	46.5479	0	C1203	70.37	A6802	0.1854
High	KQTQTFTTY	9	3	3	P54652;P17066;P11142		0	3.96341e+06	0	3.39e-10	3.28314	2	1117.55	-0.0139029	32.7989	0	C1203	40.74	B1503	0.0027
High	KQFQKVITEY	5	1	1	Q7KZF4		0	3.67421e+06	0	3.071e-15	3.28007	2	1283.7	-0.239169	36.0694	0	C1203	37.14	B1503	0.0245
High	VKVDLSEKY	6	1	1	P43243		0	2.09451e+06	0	7.459e-10	3.27948	2	1080.59	-0.147986	36.3387	0	C1203	44.44	B1503	0.1387
High	DVDVSLPKV	14	1	1	Q09666		0	9.11821e+06	0	8.566e-08	3.27486	2	971.541	-0.211337	60.1743	0	C1203	37.04	A6802	0.6227
High	FASGLIHRV	69	1	1	Q8N6L1		0	5.76256e+08	0	2.334e-09	3.27454	2	999.572	-1.89131	38.1088	0	C1203	88.89	A6802	0.0309
High	SGYYRVSSY	6	1	1	Q9UNQ0		0	3.22067e+06	0	1.121e-05	3.26552	2	1081.49	-0.772216	36.6264	0	C1203	44.44	C1203	0.065
High	NTVDFFNQI	29	2	2	Q9H8S9;Q7L9L4		0	3.84899e+08	0	3.571e-07	3.26398	2	1097.53	-0.398046	77.9847	0	C1203	62.96	A6802	0.0064
High	KAIDYIRFL	13	1	1	P36956		0	2.10914e+07	0	3.168e-10	3.26311	2	1138.66	-0.355398	61.546	0	C1203	85.19	C1203	0.0125
High	TTFDKEFLL	14	1	1	O60306		0	2.71646e+07	0	1.117e-06	3.2629	2	1113.58	-0.668583	66.4544	0	C1203	74.07	A6802	0.0214
High	IKISNPTEF	10	1	1	Q9BXS6		0	1.47666e+07	0	1.453e-11	3.25831	2	1048.57	-0.651662	49.8568	0	C1203	40.74	B1503	0.0114
High	YAFAHILTV	4	1	1	O75204		0	3.03743e+07	0	6.269e-13	3.25804	2	1034.57	-0.264179	66.4938	0	C1203	92.59	C1203	0.0029
High	LAKAWPTVL	9	1	1	P31040		0	4.2959e+06	0	0.0005933	3.25764	2	998.602	-1.77368	58.9633	0	C1203	81.48	C1203	0.0648
High	NVDISAPKV	8	1	1	Q09666		0	3.97955e+06	0	7.209e-10	3.25096	2	942.525	-0.411928	44.8865	0	C1203	37.04	A6802	0.7329
High	FKFmPPPTY	20	1	1	Q9H3M7	M4(Oxidation)	0	1.38759e+07	0	3.445e-08	3.24676	2	1143.55	-0.00648171	56.5088	0	C1203	51.85	B1503	0.0044
High	YKAPITNEF	6	1	1	Q9Y4X0		0	4.07735e+06	0	2.734e-10	3.2446	2	1082.55	-0.147826	47.1895	0	C1203	48.15	B1503	0.0073
High	DTFSGIGKKFGL	8	1	1	Q15847		0	1.11878e+07	0	2.259e-08	3.24391	2	1269.68	-0.149605	62.3003	0		0	A6802	1.1225
High	KKFHGYFKF	5	1	1	P36639		0	4.00892e+06	0	1.006e-09	3.24031	3	1201.65	-0.0293779	30.2421	0	C1203	33.33	B1503	0.0295
High	SAVNIIRTF	6	1	1	P29728		0	4.62953e+06	0	4.118e-05	3.23992	2	1020.58	-0.274037	56.224	0	C1203	77.78	C1203	0.0226
High	EIFNLKFAQA	11	1	1	P78347		0	1.52892e+07	0	2.448e-08	3.23948	2	1180.64	0.0124485	66.1311	0	C1203	8.57	A6802	1.561
High	TKYLENQAF	4	1	1	Q99661		0	4.86996e+06	0	3.507e-06	3.23858	2	1113.56	-0.537858	42.8506	0	C1203	33.33	B1503	0.0182
High	FGFHKPKMY	13	1	1	Q9NP50		0	1.56695e+07	0	2.778e-12	3.2379	2	1154.58	-0.634996	34.848	0	C1203	51.85	C1203	0.1929
High	DTAEIFHSA	10	1	1	Q92538		0	2.30938e+07	0	8.997e-07	3.23041	2	990.452	-0.304026	44.6985	0	C1203	37.04	A6802	0.0068
High	RSTKTGTAY	3	1	1	P17844		0	4.10013e+06	0	1.664e-05	3.22233	2	984.511	0.248547	15.984	0	C1203	66.67	B1503	0.2802
High	AAFLKAIGY	13	1	1	O75533		0	2.2916e+07	0	1.005e-11	3.22226	2	953.545	-0.514702	58.1253	0	C1203	85.19	C1203	0.1556
High	FISEIIHQL	6	1	1	Q9C040		0	7.6269e+06	0	1.053e-06	3.21422	2	1099.61	-0.656685	69.1897	0	C1203	51.85	A6802	0.0141
High	YVTDVLYRV	15	1	1	Q96Q15		0	5.72358e+07	0	4.84e-07	3.21384	2	1127.61	-0.0147488	60.95	0	C1203	44.44	A6802	0.008
High	RKIEDNEFHY	3	1	1	O43847		0	1.29653e+06	0	0.00235	3.21265	3	1350.64	0.0300933	30.1729	0	C1203	28.57	B1503	0.311
High	YQYLEQSKY	2	1	1	Q9BTE7		0	1.44169e+06	0	1.111e-06	3.21197	2	1221.58	-0.27557	40.5619	0	C1203	44.44	B1503	0.0039
High	YLADIFTKL	12	1	1	Q49AG3		0	2.96795e+07	0	2.407e-09	3.21155	2	1083.61	-0.623487	75.6754	0	C1203	48.15	C1203	0.0344
High	SIAGIFKEV	20	1	1	Q9NQQ7		0	2.43363e+07	0	1.927e-06	3.21085	2	963.551	-0.316041	60.2891	0	C1203	51.85	A6802	0.0436
High	SAAEEVKTY	3	1	1	Q5JRA6		0	1.09027e+06	0	1.108e-09	3.20245	2	997.484	-0.0723403	27.609	0	C1203	92.59	C1203	0.1392
High	GKYGFSDPLTF	3	2	2	Q92569;P27986		0	4.90384e+06	0	3.647e-12	3.19879	2	1231.6	0.397706	67.1737	0		0	B1503	0.7111
High	DTFFRPLNV	14	1	1	Q13444		0	3.70542e+07	0	1.495e-06	3.19741	2	1108.58	-0.0744109	68.7921	0	C1203	77.78	A6802	0.0509
High	KAYHEQLTV	9	1	1	Q9BQE3		0	6.31194e+06	0	0.0004862	3.19512	2	1088.57	-0.652042	28.2775	0	C1203	85.19	C1203	0.0888
High	SNSDVIRQV	6	1	1	Q9Y5K5		0	2.29782e+07	0	2.632e-05	3.19109	2	1017.53	-0.355055	33.8536	0	C1203	51.85	A6802	1.2171
High	GKAPLNVQF	3	1	1	O75369		0	8.463e+06	0	7.114e-08	3.1889	2	973.546	-0.412023	50.0905	0	C1203	44.44	B1503	0.0364
High	HVVDFFNRV	27	1	1	Q96BX8		0	5.08673e+07	0	3.985e-10	3.18559	2	1132.59	-1.58134	51.5454	0	C1203	40.74	A6802	0.0068
High	ATYVFLHTV	1	1	1	Q53FV1		0	3.82769e+06	0	6.356e-05	3.18305	2	1050.56	-0.411527	57.7802	0	C1203	77.78	A6802	0.1498
High	DTAEIIKTL	8	1	1	P82909		0	2.85684e+07	0	8.454e-07	3.18303	2	1003.57	-0.412873	59.1324	0	C1203	85.19	A6802	0.0243
High	SAVDFIRTL	9	1	1	Q9UEE5		0	2.6162e+08	0	6.486e-06	3.18259	2	1021.57	-0.583481	67.0678	0	C1203	88.89	C1203	0.0059
High	EIIQRIENV	6	1	1	Q9H074		0	4.04975e+06	0	5.807e-05	3.18043	2	1113.63	-0.577707	49.4455	0	C1203	40.74	A6802	0.0496
High	DVINVFHHL	12	1	1	Q9UK58		0	1.43166e+07	0	0.0001747	3.17763	2	1093.58	-0.702923	57.7733	0	C1203	37.04	A6802	0.0237
High	GQRKPATSY	16	1	1	P46779		0	8.88823e+07	0	2.208e-05	3.17709	2	1007.53	-0.240562	16.3968	0	C1203	37.04	B1503	0.0046
High	VTTDIQVKV	15	1	1	O00267		0	4.41824e+07	0	0.003038	3.17646	2	1002.58	-0.58473	46.1445	0	C1203	77.78	A6802	0.0369
High	HQQPPSQQY	8	1	1	Q15532		0	2.21715e+06	0	4.952e-10	3.17576	2	1112.51	-0.50441	22.0587	0	C1203	44.44	B1503	0.0037
High	YAIDNPLHY	7	1	1	A5YKK6		0	7.88692e+06	0	4.17e-14	3.17441	2	1105.53	-0.445019	56.8612	0	C1203	88.89	C1203	0.0069
High	GKLKQFDAY	9	1	1	Q9Y282		0	1.19698e+07	0	0.00113	3.17262	2	1069.57	-1.2898	31.2488	0	C1203	37.04	B1503	0.2617
High	GKYFGGVLEY	14	1	1	O94955		0	3.21373e+07	0	6.485e-09	3.17061	2	1132.57	-0.810064	59.2069	0	C1203	40	B1503	0.08
High	GKVGFQSFF	15	1	1	P60903		0	1.68478e+07	0	6.932e-05	3.1694	2	1016.52	-0.214763	63.0772	0	C1203	33.33	B1503	0.296
High	YSFGHPSSV	13	1	1	P31327		0	3.43787e+07	0	3.24e-05	3.16898	2	980.447	-0.237904	38.9964	0	C1203	81.48	C1203	0.0052
High	NAFSGVmmL	85	1	1	Q9NTX5	M7(Oxidation); M8(Oxidation)	0	1.34697e+06	0	0.0001477	3.16504	2	1001.44	-0.273248	66.2979	0	C1203	85.19	C1203	0.0302
High	KQIHFLYQY	4	1	1	Q14204		0	2.88039e+06	0	4.239e-10	3.16393	2	1239.65	0.348581	46.0165	0	C1203	37.04	B1503	0.0595
High	WAYPRQVFI	12	1	1	Q9P2D0		0	2.03491e+07	0	1.968e-07	3.15968	2	1179.63	-0.373454	65.6594	0	C1203	81.48	C1203	0.0611
High	DTFVHVTDL	13	1	1	P62263		0	2.48947e+07	0	2.957e-05	3.15848	2	1046.52	0.199929	61.9878	0	C1203	74.07	A6802	0.4268
High	RAYQQSEAY	12	1	1	Q9P0W2		0	1.0918e+07	0	1.261e-11	3.15451	2	1115.51	-0.316655	24.1524	0	C1203	77.78	B1503	0.024
High	SKEDDVRQY	9	1	1	P62753		0	2.87709e+06	0	2.049e-09	3.15044	2	1139.53	-0.0165484	20.0068	0	C1203	48.15	B1503	0.5897
High	KAITFVTQY	10	1	1	Q9H0S4		0	1.48467e+07	0	3.409e-05	3.15008	2	1070.59	-1.97668	49.9717	0	C1203	77.78	C1203	0.0505
High	RQYAKDIGF	11	1	1	P62273		0	1.73102e+07	0	1.346e-09	3.14555	2	1097.57	-0.29827	35.6998	0	C1203	37.04	B1503	0.0026
High	ETFPANIQV	33	1	1	Q5VYK3		0	3.31977e+08	0	9.073e-07	3.14375	2	1018.52	0.18178	66.5902	0	C1203	81.48	A6802	0.0025
High	VAFPTEIKV	12	1	1	Q9BPX7		0	1.96858e+07	0	0.0002829	3.1434	2	1003.58	-0.353256	60.545	0	C1203	92.59	C1203	0.1755
High	KKIEKLEEY	12	1	1	O95786		0	7.38565e+06	0	3.553e-13	3.14141	2	1179.66	-0.18695	22.5062	0	C1203	44.44	B1503	0.027
High	TSAAIYHVL	3	1	1	P46977		0	3.18225e+06	0	1.89e-09	3.13918	2	974.53	-0.517587	49.4453	0	C1203	74.07	A6802	0.2433
High	YKEDHPFEY	8	1	1	Q9H0R8		0	5.69472e+06	0	0.002322	3.13798	2	1227.53	-0.129985	36.1619	0	C1203	51.85	B1503	0.1293
High	TTSTITRHTV	4	1	1	Q07954		0	994997	0	3.477e-05	3.13677	2	1116.6	-0.250613	21.0542	0	C1203	42.86	A6802	0.1164
High	VQGIFVEKY	5	3	3	P62834;P61224;A6NIZ1		0	1.00674e+07	0	2.187e-07	3.13662	2	1082.59	-1.964	50.5799	0	C1203	44.44	B1503	0.2769
High	EAIGYFEQQL	2	1	1	Q96AY4		0	3.78426e+06	0	6.7e-07	3.13165	2	1197.58	-0.00870089	72.1253	0	C1203	62.86	A6802	1.3119
High	SKNVSGISF	7	1	1	P49792		0	2.71915e+06	0	0.0004905	3.13028	2	938.494	-0.0245886	41.5469	0	C1203	33.33	B1503	0.015
High	SKYEALQTF	9	2	2	O15525;O60675		0	5.71982e+06	0	1.327e-06	3.12841	2	1086.55	-0.181292	46.1461	0	C1203	40.74	B1503	0.0033
High	GKYLELLGY	5	1	1	O94979		0	1.94286e+07	0	1.996e-08	3.12569	2	1055.58	-0.351916	65.6632	0	C1203	44.44	B1503	0.1584
High	VTYNYPVHY	4	1	1	Q9NV96		0	5.39979e+06	0	3.441e-09	3.12243	2	1155.55	0.0981086	47.7624	0	C1203	81.48	C1203	0.0317
High	SAYEIIRDY	10	1	1	O60287		0	2.33009e+07	0	2.9e-07	3.12035	2	1129.55	-0.346817	52.3595	0	C1203	88.89	C1203	0.0162
High	EVFASLFHKV	5	1	1	Q27J81		0	4.07401e+06	0	0.0005283	3.11114	2	1176.64	-0.155094	56.7965	0	C1203	31.43	A6802	0.125
High	AKLDHVNIVHY	3	1	1	P19525		0	3.31959e+06	0	8.873e-16	3.11059	3	1308.71	0.143697	36.6389	0		0	B1503	0.8505
High	VKTGTITTF	21	1	1	P13639		0	8.85157e+07	0	1.49e-05	3.10899	2	967.545	-0.468758	40.7088	0	C1203	44.44	B1503	0.0132
High	RKFPADYIKY	5	1	1	Q7Z333		0	6.92948e+06	0	2.438e-09	3.10729	3	1300.71	0.138342	40.8957	0	C1203	40	B1503	0.0593
High	KIYEPPRYm	7	1	1	Q9H2P9	M9(Oxidation)	0	4.87536e+06	0	0.0002258	3.10639	3	1212.61	0.345862	34.6885	0	C1203	44.44	C1203	0.0105
High	GKLLIGTLY	11	1	1	Q15165		0	1.12279e+07	0	2.42e-07	3.10548	2	977.603	-0.142658	61.325	0	C1203	37.04	B1503	0.2399
High	TTFEHAHNM	6	1	1	P13639		0	1.97909e+06	0	4.091e-06	3.10182	2	1087.46	-0.578998	22.0518	0	C1203	66.67	A6802	0.0346
High	YKIAFPYLY	6	1	1	Q6P2Q9		0	8.55941e+06	0	1.116e-11	3.09584	2	1177.63	0.187521	74.1953	0	C1203	44.44	B1503	0.0814
High	HQITVLHVY	10	1	1	Q9NYP7		0	7.40678e+06	0	0.0003261	3.07765	2	1109.61	-0.49978	42.8796	0	C1203	40.74	B1503	0.0082
High	GKAFFLSSY	11	1	1	O75123		0	1.332e+07	0	5.372e-07	3.0772	2	1019.52	0.248901	57.4547	0	C1203	40.74	B1503	0.1579
High	YLKDFFSNV	8	1	1	O95786		0	7.20185e+06	0	1.379e-07	3.07681	2	1132.57	0.0521923	64.8691	0	C1203	44.44	A6802	0.5346
High	GKLKDPANF	4	1	1	P15559		0	1.25131e+06	0	0.002176	3.07552	2	989.541	-0.144411	29.4244	0	C1203	33.33	B1503	0.2023
High	FTSQVIRNL	4	1	1	Q14204		0	3.88436e+06	0	0.001252	3.07538	2	1077.6	-0.916593	50.058	0	C1203	81.48	C1203	0.1727
High	mASALVHIL	17	1	1	Q5VWQ8	M1(Oxidation)	0	8.79645e+06	0	5.953e-06	3.07217	2	970.539	-0.395087	57.2977	0	C1203	81.48	C1203	0.1674
High	GKLQKTVSY	7	1	1	P12757		0	2.2718e+06	0	0.0009836	3.07112	2	1023.58	-0.169814	23.6234	0	C1203	40.74	B1503	0.0306
High	TAVALLRLL	13	1	1	Q14165		0	1.34625e+07	0	7.374e-07	3.06969	2	969.645	-0.341429	75.8089	0	C1203	77.78	C1203	0.5334
High	YKILGGSVL	13	1	1	Q15843		0	2.77186e+07	0	3.699e-05	3.06897	2	949.572	-0.222767	57.4876	0	C1203	44.44	B1503	0.1272
High	DVNAIIHYL	8	1	1	P09914		0	1.19233e+07	0	0.001339	3.06893	2	1057.57	-0.486994	75.6878	0	C1203	40.74	A6802	0.0137
High	AKAPPTACY	16	1	1	P17676		0	1.9063e+07	0	1.478e-06	3.06861	2	921.45	-0.0929349	29.0161	0	C1203	51.85	B1503	0.027
High	GKFNVLLTTY	6	2	2	P51531;P51532		0	5.40633e+06	0	4.922e-10	3.06604	2	1155.64	-0.594461	62.1044	0	C1203	37.14	B1503	0.5712
High	RQFPVTVHF	9	1	1	Q8IY37		0	1.61935e+07	0	2.461e-07	3.06525	2	1130.61	-0.592972	50.0446	0	C1203	44.44	B1503	0.0015
High	GHYLGEFSITY	18	1	1	P62841		0	3.90812e+07	0	2.817e-11	3.06331	2	1286.6	-0.798789	65.2717	0		0	B1503	1.6918
High	RKFDAIYKY	6	1	1	Q5C9Z4		0	8.65237e+06	0	0.000532	3.06001	3	1203.65	0.15374	33.6816	0	C1203	48.15	B1503	0.0043
High	RKLPEKTQTF	7	1	1	Q96SY0		0	4.44829e+06	0	2.407e-05	3.0564	3	1247.71	0.19222	22.5533	0	C1203	34.29	B1503	0.1149
High	SSSGIVYKV	9	1	1	Q9P2E3		0	6.98757e+06	0	0.001171	3.05639	2	939.515	-0.0290938	37.9565	0	C1203	77.78	A6802	0.0342
High	GKAFTHYSTY	2	1	1	Q14592		0	1.06142e+06	0	1.105e-06	3.05521	2	1174.55	0.22546	28.3523	0	C1203	28.57	B1503	0.5361
High	KSFEAPIKL	10	1	1	Q8TCT9		0	1.23627e+07	0	0.0001494	3.0541	2	1032.61	-0.283935	45.7467	0	C1203	81.48	C1203	0.0402
High	NVVDVFHAV	13	1	1	Q15262		0	2.63446e+07	0	7.404e-06	3.05361	2	999.526	-0.0468875	60.9551	0	C1203	40.74	A6802	0.0022
High	KASGTLREY	25	1	1	Q02543		0	5.79343e+07	0	8.217e-12	3.04787	2	1024.54	0.0611267	20.2328	0	C1203	88.89	C1203	0.2953
High	TTYDLTHTL	14	1	1	Q9NTJ5		0	2.56843e+07	0	1.63e-08	3.0478	2	1064.52	-1.21892	51.351	0	C1203	77.78	A6802	0.0051
High	LAIEHVRFF	3	1	1	Q8NEM2		0	5.5822e+06	0	1.667e-05	3.0451	2	1131.63	-0.506002	59.4606	0	C1203	77.78	C1203	0.0599
High	YTSDLHFQV	11	1	1	Q1KMD3		0	1.97544e+07	0	6.435e-11	3.04455	2	1109.53	-0.815796	55.0257	0	C1203	77.78	A6802	0.0061
High	GKPPFEANTY	12	1	1	O14965		0	1.98086e+07	0	3.091e-09	3.04361	2	1123.54	-0.302432	39.5729	0	C1203	31.43	B1503	0.921
High	ETVTATATSQV	5	1	1	Q9H4A3		0	3.72315e+06	0	0.0004005	3.04051	2	1107.55	0.157838	40.9925	0		0	A6802	0.5902
High	HAAGVLLHV	4	1	1	Q6UX98		0	7.8289e+06	0	6.061e-10	3.03893	2	916.536	-0.119857	37.7405	0	C1203	85.19	A6802	0.0153
High	YAYPYSYYY	10	1	1	Q96PV6		0	1.2357e+07	0	8.246e-12	3.03588	2	1252.52	0.308043	67.4245	0	C1203	88.89	C1203	0.0021
High	VKIQKHVTF	5	1	1	P23381		0	4.81945e+06	0	1.446e-08	3.0356	2	1099.66	-0.00205148	26.768	0	C1203	40.74	B1503	0.0184
High	TKVGPNATY	5	1	1	Q9Y5V3		0	2.28041e+06	0	2.11e-06	3.03357	2	950.494	-0.142186	27.9401	0	C1203	44.44	B1503	0.0179
High	DVSKIFQVV	7	1	1	Q5TF58		0	1.89178e+07	0	0.001631	3.03334	2	1034.59	-0.0589664	70.7103	0	C1203	44.44	A6802	0.1308
High	AKAGITTTL	6	1	1	P33992		0	3.59053e+06	0	1.055e-05	3.03208	2	875.52	-0.000435099	35.4055	0	C1203	51.85	B1503	0.1159
High	GKKKYETEF	15	1	1	Q96QD8		0	2.67871e+07	0	4.051e-05	3.03051	2	1129.59	-0.259143	19.8241	0	C1203	33.33	B1503	0.1692
High	KKVGIVGKY	9	1	1	P61513		0	3.54698e+06	0	3.314e-08	3.02798	2	991.63	-0.175463	21.3835	0	C1203	44.44	B1503	0.0655
High	YAAPPSPPL	2	1	1	Q16610		0	5.6655e+06	0	9.383e-08	3.02447	2	912.483	-0.0556625	56.5875	0	C1203	88.89	C1203	0.008
High	FQYPDTRYL	10	1	1	Q9NY61		0	1.19342e+07	0	1.923e-10	3.02082	2	1202.58	-0.540235	57.3423	0	C1203	55.56	C1203	0.0253
High	KKFVETPGQKY	7	1	1	P05455		0	2.97346e+06	0	0.0003701	3.02044	3	1324.73	0.349719	23.9638	0		0	B1503	0.655
High	FAFSGVLRA	12	1	1	Q92766		0	5.47828e+07	0	2.405e-09	3.0202	2	967.536	-0.413634	60.7938	0	C1203	55.56	C1203	0.208
High	FKNIQPSSF	5	1	1	Q9BVQ7		0	3.04218e+06	0	2.727e-05	3.01895	2	1067.55	-0.811427	45.4584	0	C1203	37.04	B1503	0.027
High	YKVEYPImY	30	1	1	O14880	M8(Oxidation)	0	1.2957e+07	0	7.122e-06	3.01616	2	1221.59	-0.349883	56.5437	0	C1203	51.85	B1503	0.0153
High	FKIDVGFVY	4	1	1	Q9NZM1		0	2.92496e+06	0	0.0003044	3.0155	2	1087.58	0.0199427	73.3838	0	C1203	48.15	B1503	0.0366
High	HVFDHPWETV	7	1	1	Q9Y3B1		0	7.19195e+06	0	2.827e-07	3.01426	2	1266.59	-0.661803	50.9972	0	C1203	37.14	A6802	0.0334
High	GQYSTGKTSF	4	1	1	Q9NZN4		0	3.37224e+06	0	0.0001692	3.01202	2	1075.5	-0.862014	30.1915	0	C1203	34.29	B1503	0.0117
High	KKIESSGVTY	7	1	1	Q9UKN8		0	2.46153e+06	0	3.79e-07	3.01174	2	1111.6	-0.428885	23.7986	0	C1203	31.43	B1503	0.0258
High	MKLLTGLVF	2	2	2	P0DJI8;P0DJI9		0	3178570	0	0.0004316	3.01173	2	1021.61	-0.0729642	76.7312	0	C1203	37.04	B1503	0.1401
High	HKVETFSGVY	4	1	1	P62081		0	5.94819e+06	0	0.002423	3.00968	2	1166.58	-0.251561	35.6581	0	C1203	34.29	B1503	0.5763
High	AAYGYGIRY	9	3	3	P11216;P06737;P11217		0	3.24808e+07	0	8.687e-08	3.00877	2	1033.51	-0.110241	45.5715	0	C1203	88.89	C1203	0.0164
High	AKYPIKQSL	9	1	1	P21283		0	9.3584e+06	0	0.002026	3.0056	2	1047.62	-0.527936	30.5341	0	C1203	51.85	B1503	0.0819
High	KAFPKAYLL	22	1	1	Q66K89		0	4.03002e+07	0	0.0001991	3.00086	2	1050.63	-0.329665	45.3281	0	C1203	85.19	C1203	0.0085
High	EVSPVSFHQV	22	1	1	Q8N543		0	1.01365e+08	0	6.741e-11	2.99726	2	1128.57	-0.463071	48.2263	0	C1203	25.71	A6802	0.0332
High	RQLYLSERY	2	1	1	Q5T953		0	4.04623e+06	0	0.0001376	2.99134	2	1227.65	-0.0606709	35.8764	0	C1203	37.04	B1503	0.033
High	EIIDFFLGA	21	1	1	P15880		0	1.03677e+08	0	7.108e-05	2.99038	2	1024.53	-0.308172	100.128	0	C1203	7.41	A6802	0.047
High	GKSSVIQVF	9	1	1	Q8WVC6		0	7.99503e+06	0	4.675e-05	2.98995	2	964.546	-0.126648	50.025	0	C1203	44.44	B1503	0.0291
High	AAIEWIIEH	5	1	1	Q96N28		0	5.15447e+06	0	1.306e-08	2.98823	2	1081.57	-0.381815	65.5416	0	C1203	55.56	C1203	2.0231
High	ETFKDFPQm	78	2	2	P15170;Q8IYD1	M9(Oxidation)	0	1.70227e+07	0	3.275e-06	2.98737	2	1158.51	-0.0422063	47.747	0	C1203	62.96	A6802	0.2512
High	FKFGDQGGF	4	1	1	P49790		0	7.50113e+06	0	2.052e-09	2.98452	2	1002.47	-0.25068	53.5205	0	C1203	40.74	B1503	0.2126
High	AASALIRTL	5	1	1	Q13535		0	4.18096e+06	0	1.93e-10	2.98053	2	915.562	0.00122653	48.0304	0	C1203	92.59	C1203	0.0771
High	KQIFETIYY	15	1	1	P23921		0	2.36814e+07	0	2.515e-07	2.9803	2	1204.62	-0.360322	60.5074	0	C1203	40.74	B1503	0.012
High	SVITQVFHV	13	1	1	Q00341		0	65664935	0	3.053e-07	2.97957	2	1029.57	-0.34578	65.4302	0	C1203	40.74	A6802	0.03
High	AKWNPTAGVAF	2	1	1	P19387		0	6.02668e+06	0	2.875e-08	2.97659	2	1161.6	-0.34209	57.2186	0		0	B1503	0.5535
High	FSMYKPITY	3	1	1	Q68CL5		0	1.98987e+06	0	1.016e-07	2.97319	2	1149.56	-0.578234	57.2952	0	C1203	81.48	C1203	0.0087
High	VKFGGQLLSF	1	1	1	Q08945		0	7.05281e+06	0	8.42e-08	2.9728	2	1095.62	-0.188811	69.0722	0	C1203	51.43	B1503	0.1139
High	EAAAVFKTL	15	1	1	Q8IWZ6		0	2.60778e+07	0	6.339e-07	2.96888	2	949.534	-1.64424	50.3613	0	C1203	85.19	A6802	0.1297
High	FAYPAIRYLL	9	1	1	P51398		0	1.29696e+07	0	7.216e-11	2.96359	2	1226.69	-0.163478	78.0849	0	C1203	68.57	C1203	0.2327
High	GKIQFGYVY	9	1	1	Q969M3		0	40639885	0	0.001055	2.96325	2	1074.56	-0.061535	54.6827	0	C1203	40.74	B1503	0.035
High	YKYQHDDGRVSY	4	1	1	P60983		0	2.30255e+06	0	1.354e-17	2.96064	3	1530.7	-0.0951614	26.4144	0		0	B1503	0.1119
High	DQAEIRSLV	13	2	2	P09913;O14879		0	23035561	0	0.002579	2.96001	2	1030.55	-0.966365	51.0177	0	C1203	44.44	A6802	0.5213
High	VKVIDRILY	6	1	1	O75533		0	7.03058e+06	0	2.834e-06	2.95872	2	1118.69	-0.406437	49.1174	0	C1203	44.44	B1503	0.1472
High	YVSEILEKV	12	1	1	P42704		0	1.05262e+07	0	1.912e-09	2.95779	2	1079.6	-0.251242	56.2171	0	C1203	48.15	A6802	0.0089
High	TLADVLYHV	16	1	1	Q9UBL3		0	2.46518e+07	0	7.303e-05	2.95765	2	1030.56	-0.701978	67.2042	0	C1203	44.44	A6802	0.0213
High	AQIKFLNTY	6	1	1	Q8ND90		0	8.57104e+06	0	0.002132	2.9568	2	1097.6	0.819802	54.3262	0	C1203	44.44	B1503	0.0029
High	RKFTQLREY	6	1	1	O95625		0	4.6861e+06	0	0.00246	2.95495	3	1240.68	-0.171898	25.7281	0	C1203	48.15	B1503	0.0127
High	EVSFVIHNL	35	2	2	P49903;Q99611		0	1.38745e+08	0	7.096e-10	2.95224	2	1057.57	-0.727301	61.6376	0	C1203	44.44	A6802	0.0164
High	GKTSLITRF	9	2	2	P20340;Q9NRW1		0	7.15074e+06	0	0.003554	2.95095	2	1022.6	-0.656063	36.5443	0	C1203	37.04	B1503	0.1631
High	SVIGGNLTGIFI	6	1	1	Q9BXL6		0	5.88246e+06	0	3.347e-11	2.94648	2	1190.68	0.320007	91.9078	0		0	A6802	1.8764
High	YKIDPSTL	6	1	1	O15294		0	4.85257e+06	0	0.001249	2.94188	2	936.503	-0.642756	48.6998	0	C1203	43.33	B1503	1.6411
High	NTATIFHEL	40	1	1	Q9UHD2		0	3.95701e+08	0	0.0003442	2.9416	2	1045.53	-0.723196	53.524	0	C1203	74.07	A6802	0.0071
High	YKFDFPVSY	4	1	1	Q9NXE4		0	4.65649e+06	0	6.188e-06	2.94084	2	1165.56	-0.433697	68.6297	0	C1203	55.56	B1503	0.0018
High	AKIVPKISY	13	1	1	Q7Z417		0	3.55734e+07	0	4.89e-07	2.93888	2	1018.63	-0.316382	38.458	0	C1203	44.44	B1503	0.013
High	KAIDIILRC	22	1	1	Q9Y6K5		0	4.57657e+07	0	0.002847	2.93815	2	1044.62	-0.594441	52.2827	0	C1203	48.15	C1203	1.8325
High	SVYEGGVFFL	4	3	3	P51965;Q96LR5;Q969T4		0	8.41807e+06	0	2.023e-06	2.93812	2	1117.56	-0.142532	88.9008	0	C1203	37.14	A6802	0.1933
High	VKFDAVIGY	7	1	1	Q8NBQ5		0	4.81764e+06	0	0.001805	2.93738	2	1011.55	-0.773865	59.2853	0	C1203	55.56	B1503	0.0097
High	FKFVEQQSY	3	1	1	Q99590		0	2.8433e+06	0	0.001069	2.93619	2	1175.57	-0.53075	48.1275	0	C1203	44.44	B1503	0.0346
High	YAYDGKDYIA	13	17	17	P01892;P30447;P05534;P10316;P01889;P30460;Q04826;P30479;P30480;P30486;P18464;P30490;P30498;Q31610;P30499;P04222;P17693		0	3.14644e+07	0	2.695e-06	2.9332	2	1178.54	0.495193	45.1388	0	C1203	45.71	A6802	0.9072
High	EVFDKTYQF	14	1	1	Q96EU6		0	3.57921e+07	0	3.332e-11	2.92954	2	1176.56	-0.643587	54.7098	0	C1203	37.04	A6802	0.1371
High	AKVKFEERY	7	1	1	P61353		0	1.97272e+07	0	4.744e-06	2.92649	2	1169.63	0.116298	24.602	0	C1203	40.74	B1503	0.2739
High	SKKIDRHmY	12	1	1	P84098	M8(Oxidation)	0	1.54944e+07	0	0.000194	2.92473	2	1193.61	-0.145526	15.7416	0	C1203	37.04	B1503	0.5279
High	AQGPTPRYF	12	1	1	O60427		0	3.1231e+08	0	1.971e-05	2.92201	2	1036.52	-0.870316	40.2498	0	C1203	48.15	B1503	0.0108
High	SKLSFSQVF	9	1	1	Q9UJX4		0	2.15809e+07	0	4.113e-08	2.92043	2	1042.56	-0.469315	59.2569	0	C1203	37.04	B1503	0.031
High	AKFSLPVSL	9	1	1	Q12980		0	8.65557e+06	0	8.559e-09	2.91433	2	961.572	0.277408	66.9168	0	C1203	55.56	B1503	0.0876
High	DVYDKVDYL	9	1	1	Q14254		0	1.14021e+07	0	0.0006624	2.90851	2	1129.54	-0.779519	58.5533	0	C1203	48.15	A6802	0.0235
High	NVAEIVIHI	23	1	1	Q9BZD4		0	4.57773e+07	0	3.532e-07	2.90474	2	1007.59	-0.206335	65.8956	0	C1203	44.44	A6802	0.0034
High	SKFPTQISL	10	1	1	O15164		0	1.135e+07	0	4.127e-06	2.90171	2	1020.57	-0.384311	55.6034	0	C1203	51.85	B1503	0.061
High	ILGPPGSVY	10	3	3	P51965;Q96LR5;Q969T4		0	4.09393e+06	0	1.661e-06	2.90012	2	902.498	-0.0839792	60.558	0	C1203	48.15	B1503	0.0572
High	IAFPTSISV	17	1	1	Q9UQ80		0	8.83947e+07	0	0.0003519	2.89624	2	934.524	-0.31547	76.6583	0	C1203	88.89	C1203	0.0073
High	DTFDKNYKA	9	1	1	Q9BZG1		0	1.29372e+07	0	2.014e-08	2.8952	2	1101.52	-0.31933	26.2993	0	C1203	37.04	A6802	0.0393
High	RQQPPSTTTF	9	1	1	A3KN83		0	2.98705e+06	0	0.002516	2.8952	2	1162.58	-0.437796	32.3386	0	C1203	37.14	B1503	0.0083
High	YKKQFSQY	4	1	1	P46777		0	5.28121e+06	0	4.976e-05	2.89453	2	1091.55	-0.542439	23.2523	0	C1203	43.33	B1503	1.1827
High	RNYYRKIGY	8	1	1	Q9H9T3		0	1.22479e+07	0	1.034e-06	2.89327	3	1232.65	0.194195	25.3203	0	C1203	44.44	B1503	0.4643
High	SKLQNNNVY	6	1	1	P63010		0	2.59746e+06	0	0.0001822	2.89101	2	1079.55	-0.452365	26.0051	0	C1203	40.74	B1503	0.0398
High	GQYNKEDPTSF	3	1	1	Q15437		0	2.08947e+06	0	0.003292	2.88974	2	1285.57	-0.423139	37.3306	0		0	B1503	0.1347
High	FTAAIISRV	9	1	1	Q9Y570		0	1.74546e+07	0	0.0004931	2.88907	2	977.578	-0.0244247	54.065	0	C1203	77.78	A6802	0.0048
High	HTINGHNAEV	14	1	1	P22626		0	2.51545e+07	0	0.0002321	2.88827	2	1091.52	-0.341508	20.2503	0	C1203	45.71	A6802	0.0866
High	TAAQVARVL	9	1	1	A5YKK6		0	1.01539e+07	0	8.886e-05	2.88815	2	928.557	-0.667671	39.0449	0	C1203	85.19	C1203	0.1716
High	SVSPVVRVAV	23	1	1	P13639		0	4.54706e+08	0	0.0005329	2.88696	2	1012.61	-0.576546	49.5099	0	C1203	25.71	A6802	0.1278
High	RKIGDTSVSY	8	1	1	P20700		0	1.3743e+07	0	0.003902	2.88683	2	1125.59	-0.659542	30.2524	0	C1203	37.14	B1503	0.0209
High	YKLLGGLAV	41	1	1	P23396		0	1.59645e+08	0	0.0003729	2.88349	2	933.576	-0.644646	63.5526	0	C1203	44.44	B1503	0.9261
High	RKVYWFEKF	7	1	1	O60524		0	6.39483e+06	0	0.0003548	2.88056	3	1302.7	-0.254474	47.0447	0	C1203	29.63	B1503	0.4355
High	TVFEHTFHV	18	1	1	P41250		0	7.90354e+07	0	1.468e-06	2.8796	2	1116.55	-0.557829	45.813	0	C1203	44.44	A6802	0.0026
High	AASSIQRVL	8	2	2	Q5BKT4;Q5I7T1		0	9.66073e+06	0	0.002433	2.87782	2	944.552	-0.566251	38.8486	0	C1203	92.59	C1203	0.2688
High	KKSDPVVSY	13	1	1	P13639		0	5.90022e+07	0	0.001002	2.87636	2	1022.55	-0.395256	24.6837	0	C1203	51.85	B1503	0.0042
High	EILDLIHKV	9	1	1	O14981		0	1.20741e+07	0	0.003671	2.87487	2	1079.65	-0.385209	59.5436	0	C1203	44.44	A6802	0.0185
High	KQPDNSPEY	8	1	1	Q9NX07		0	1.74026e+06	0	0.0001769	2.87439	2	1077.48	0.0255314	22.9002	0	C1203	44.44	B1503	0.0567
High	LSFQEVREY	3	1	1	O00311		0	4.96877e+06	0	0.001549	2.87305	2	1170.58	0.126315	51.8115	0	C1203	81.48	C1203	0.2278
High	EVFNYIHNI	15	1	1	Q8N3P4		0	2.51123e+07	0	2.919e-05	2.87231	2	1148.57	-0.61798	60.2534	0	C1203	37.04	A6802	0.0055
High	ITVSIIKEL	16	1	1	Q8TED0		0	4.07208e+07	0	0.001989	2.87218	2	1015.64	-0.483907	64.7636	0	C1203	81.48	C1203	0.2229
High	RLYGPSSVSF	14	1	1	P50454		0	2.92795e+07	0	1.226e-06	2.87162	2	1112.57	-0.317807	52.065	0	C1203	42.86	B1503	0.1323
High	ETISPSGQGV	6	1	1	P23610		0	3.71717e+06	0	0.0006617	2.87097	2	974.479	-0.345868	40.0618	0	C1203	51.43	A6802	0.0385
High	EVFPLAMNYL	11	3	3	P24385;P30279;P30281		0	7.92529e+06	0	0.0005322	2.87072	2	1196.6	-0.173041	94.0411	0	C1203	40	A6802	0.0835
High	SQFGTVTRF	16	1	1	Q9BYG3		0	1.51437e+08	0	0.0002252	2.86573	2	1042.53	-0.583044	46.2539	0	C1203	40.74	B1503	0.0015
High	LVASVRVPA	12	1	1	P42126		0	1.52104e+07	0	0.00149	2.86564	2	911.567	-0.493881	43.5904	0	C1203	11.11	A6802	0.6912
High	DSFYVHHDI	5	1	1	Q13610		0	2.75537e+06	0	1.126e-06	2.86489	2	1132.51	-0.355502	40.1381	0	C1203	62.96	A6802	0.629
High	YVFDGKPPQL	18	1	1	P39748		0	1.43355e+07	0	3.762e-07	2.86483	2	1163.61	-0.451107	59.021	0	C1203	57.14	C1203	0.1729
High	FVIDPVRNL	9	1	1	P58107		0	1.60009e+07	0	0.0005911	2.86326	2	1072.61	-0.316682	63.8751	0	C1203	51.85	C1203	0.0069
High	GKFGGDFLVY	10	1	1	Q9BSV6		0	9.03883e+07	0	1.9e-05	2.86314	2	1102.56	-0.452845	64.3498	0	C1203	54.29	B1503	0.1223
High	FVVDHVIKI	10	1	1	Q86UV5		0	1.66202e+07	0	0.0003356	2.85389	2	1069.64	-0.629365	54.9959	0	C1203	44.44	A6802	0.0218
High	VAINHIVDF	11	1	1	P78346		0	1.09812e+07	0	4.025e-05	2.85291	2	1027.56	-0.569454	60.9317	0	C1203	77.78	C1203	0.1101
High	SQYPFPVTL	14	1	1	Q5R372		0	3.63282e+07	0	1.823e-07	2.85018	2	1051.55	-0.18963	80.8455	0	C1203	59.26	B1503	0.007
High	AVTKIIAKV	10	1	1	P49419		0	8.52959e+06	0	2.777e-05	2.84908	2	942.635	-0.183796	33.0972	0	C1203	44.44	A6802	0.1748
High	HQKKEFVKY	3	1	1	Q9BUL8		0	1.29627e+06	0	6.417e-05	2.84876	3	1206.66	0.300772	18.1347	0	C1203	40.74	B1503	0.0105
High	SKLTQILSY	2	1	1	Q13123		0	1.97705e+06	0	6.071e-07	2.84368	2	1052.6	-0.793637	56.4247	0	C1203	44.44	B1503	0.0308
High	KHQEHILRF	25	1	1	Q13263		0	3.31128e+07	0	0.002808	2.84205	3	1207.67	0.334274	23.9813	0	C1203	40.74	B1503	0.1374
High	RKFEPGTQRF	4	2	2	Q96BX8;Q86TA1		0	1.67084e+06	0	3.477e-07	2.83899	3	1265.68	0.192995	25.4026	0	C1203	45.71	B1503	0.0134
High	YAFPKAVSV	17	1	1	O15427		0	2.57768e+08	0	1.821e-06	2.83859	2	981.54	-0.413303	53.5427	0	C1203	92.59	C1203	0.0015
High	EVLDFITHL	40	1	1	Q13057		0	4.38694e+08	0	0.0002196	2.83753	2	1086.58	-0.427183	81.7523	0	C1203	44.44	A6802	0.0081
High	RLYFSQQTY	15	1	1	P33897		0	1.8759e+07	0	7.841e-07	2.83714	2	1205.6	0.0472811	46.4346	0	C1203	44.44	B1503	0.0148
High	RQEGVPRTF	19	1	1	Q00403		0	4.29584e+07	0	0.001546	2.83659	2	1089.58	-0.800436	28.7221	0	C1203	44.44	B1503	0.0078
High	FVNDIFERIA	1	14	14	P33778;P62807;P58876;Q93079;P06899;O60814;Q99880;Q99879;Q99877;P23527;Q16778;Q5QNW6;Q8N257;P57053		0	6.65007e+06	0	0.002456	2.83544	2	1223.64	-0.0555703	70.2769	0	C1203	14.29	A6802	1.0194
High	AAISHGRVF	9	1	1	Q9NRX2		0	6.31955e+06	0	1.705e-06	2.83399	2	957.526	-0.429951	28.1934	0	C1203	81.48	B1503	0.051
High	AQFETKKLY	17	1	1	O60613		0	3.07234e+07	0	0.003906	2.83356	2	1127.61	-0.348385	34.0204	0	C1203	51.85	B1503	0.004
High	EVFDKTYQFL	5	1	1	Q96EU6		0	6.39411e+06	0	6.253e-06	2.83354	2	1289.64	-0.0856207	67.5132	0	C1203	48.57	A6802	0.0732
High	FVFPGELLL	18	1	1	Q15758		0	1.23159e+08	0	2.005e-08	2.82871	2	1034.59	-0.650534	101.682	0	C1203	55.56	C1203	0.0124
High	GKIGTVmTF	8	1	1	P30046	M7(Oxidation)	0	3.47991e+06	0	1.503e-06	2.82728	2	969.507	-0.129465	44.6082	0	C1203	40.74	B1503	0.013
High	YKIDEDGKKF	2	1	1	O75821		0	1.47544e+06	0	7.746e-08	2.82568	3	1242.64	0.00642126	28.6453	0	C1203	40	B1503	0.5736
High	mTSEIHNTV	52	1	1	O43264	M1(Oxidation)	0	1.69298e+07	0	0.0004038	2.82231	2	1047.48	-0.339721	25.7401	0	C1203	77.78	A6802	0.0035
High	DTSPVFQRL	9	1	1	Q9NU22		0	1.02499e+07	0	0.002892	2.81893	2	1062.56	-0.548417	53.1496	0	C1203	77.78	A6802	0.0678
High	AQYDQASTKY	2	1	1	P49454		0	553978	0	0.003456	2.81842	2	1174.54	0.114049	28.4261	0	C1203	40	B1503	0.0059
High	GQFLVKSGY	6	1	1	Q9NZI8		0	4.34247e+06	0	4.458e-08	2.8156	2	998.53	-0.270662	42.697	0	C1203	40.74	B1503	0.0481
High	RQFEFSVDSF	7	3	3	Q96IP4;Q5VWP2;Q8NEK8		0	1.02393e+07	0	0.0001839	2.81547	2	1261.58	-0.53683	65.9473	0	C1203	40	B1503	0.027
High	KLFIGGLSF	11	4	4	Q32P51;P09651;P22626;P51991		0	3.716e+07	0	2.805e-05	2.81159	2	981.575	-2.05347	74.5342	0	C1203	37.04	B1503	0.0119
High	ETIPSEIQVFV	15	1	1	Q15646		0	1.0976e+08	0	5.533e-09	2.81143	2	1261.67	0.117969	85.007	0		0	A6802	0.339
High	FSKDIFSVI	12	1	1	Q01650		0	1.83204e+08	0	0.002836	2.81021	2	1055.58	-0.370863	71.3042	0	C1203	70.37	C1203	0.11
High	FVNEIISRI	3	1	1	P43246		0	8.95212e+06	0	0.002883	2.80857	2	1090.62	-0.704039	63.7072	0	C1203	40.74	A6802	0.022
High	QKLIFTVGY	1	1	1	Q8TDB6		0	2.00473e+07	0	0.00399	2.80711	2	1068.61	-0.255653	61.1075	0	C1203	40.74	B1503	0.606
High	RQYPEVIKY	6	1	1	Q9UIF8		0	7.30482e+06	0	1.134e-05	2.80437	2	1195.65	-0.298797	38.5745	0	C1203	55.56	B1503	0.0008
High	FAYPAIRYL	45	1	1	P51398		0	3.7023e+08	0	1.859e-12	2.80315	2	1113.61	-0.212806	66.9973	0	C1203	96.3	C1203	0.0012
High	AAFAYTVKY	14	1	1	Q8N2K1		0	1.17268e+08	0	0.0001944	2.80045	2	1033.53	-1.30441	50.1523	0	C1203	85.19	C1203	0.0287
High	TVADFFIKA	6	1	1	Q709C8		0	5.17728e+06	0	0.0003562	2.7986	2	1011.55	-0.421721	64.6039	0	C1203	11.11	A6802	0.0196
High	NSYVSPRIL	10	1	1	Q9H992		0	1.86491e+07	0	1.644e-08	2.79813	2	1048.58	-0.17601	49.2418	0	C1203	77.78	C1203	0.2514
High	KHFEVLISY	6	1	1	Q86Y91		0	4.77134e+06	0	0.003157	2.79732	2	1135.61	-2.13196	50.565	0	C1203	48.15	B1503	0.0334
High	YAKLIAEL	14	1	1	Q8NI27		0	3.63183e+07	0	0.003186	2.79589	2	920.545	-0.0311998	55.0164	0	C1203	93.33	C1203	1.1616
High	FSWEGAFQHV	2	1	1	P26641		0	4.54399e+06	0	0.0009697	2.7914	2	1207.55	-0.289284	67.0321	0	C1203	60	A6802	0.8301
High	VKNPDGGSY	4	1	1	Q15646		0	1.06483e+06	0	0.0002718	2.78705	2	936.442	-0.244724	22.1053	0	C1203	48.15	B1503	0.0469
High	SAVADVRLY	1	1	1	Q92521		0	1.14665e+06	0	0.0009991	2.78232	2	993.536	-0.170959	49.2791	0	C1203	81.48	C1203	0.3769
High	DVATITKTV	3	1	1	P57740		0	2.9395e+06	0	0.0002882	2.77805	2	947.541	-0.206136	43.6041	0	C1203	48.15	A6802	0.0298
High	MPAFIFEHI	11	1	1	O00560		0	2.46629e+07	0	0.001454	2.77782	2	1104.55	-0.540085	74.7155	0	C1203	33.33	A6802	0.7009
High	SQYGSQVGY	4	1	1	Q14147		0	2.34271e+06	0	8.976e-06	2.77597	2	988.437	0.0597435	39.7812	0	C1203	48.15	B1503	0.0029
High	RKPDQVFQSY	5	1	1	Q96K76		0	3.30147e+06	0	2.269e-09	2.77374	2	1267.64	-0.199982	33.9269	0	C1203	40	B1503	0.2794
High	SSYLFIVKY	4	1	1	Q96QD8		0	2.05108e+07	0	4.073e-05	2.77179	2	1119.61	-0.0404282	66.9454	0	C1203	77.78	C1203	0.3078
High	KTPDFILQV	14	1	1	Q9Y2V0		0	2.55228e+07	0	0.0003197	2.77038	2	1060.6	-0.541472	64.6854	0	C1203	77.78	A6802	0.1542
High	FTYGAVVHY	1	1	1	Q96PZ7		0	2.18887e+06	0	0.0003547	2.76331	2	1056.51	-0.444295	52.4221	0	C1203	85.19	C1203	0.0087
High	ETLFPSKIGV	11	2	2	Q9H8S9;Q7L9L4		0	1.55744e+07	0	5.797e-08	2.76207	2	1090.61	-0.480619	61.8855	0	C1203	45.71	A6802	0.0371
High	EAFHGKFYEA	19	1	1	Q13045		0	5.53174e+07	0	1.19e-05	2.76055	2	1198.55	0.0940668	35.9328	0	C1203	42.86	A6802	0.6977
High	SMGPVRVAF	4	1	1	P29279		0	9.54206e+06	0	0.0002038	2.76024	2	963.508	0.0560188	53.9136	0	C1203	40.74	B1503	0.0604
High	YTIENPRHF	4	1	1	Q7KZF4		0	2.1593e+06	0	9.263e-08	2.76016	2	1176.58	-0.020277	36.4198	0	C1203	74.07	C1203	0.0205
High	RKLEAAEDIAY	8	1	1	P35232		0	9.4188e+06	0	0.002922	2.75751	2	1278.67	0.0716458	37.5396	0		0	B1503	0.652
High	KQTQIFTTY	6	2	2	P34931;P08107		0	3.75194e+06	0	0.000161	2.75689	2	1129.59	-0.45757	43.6821	0	C1203	40.74	B1503	0.0027
High	KQFRPPMGGY	2	1	1	Q9UKK9		0	1.92748e+06	0	0.000875	2.75651	2	1180.59	-0.450904	36.3387	0	C1203	42.86	B1503	0.0437
High	AKYPEIKSL	20	1	1	O15121		0	3.31748e+07	0	4.028e-07	2.75644	2	1048.6	-0.305308	37.692	0	C1203	59.26	B1503	0.0541
High	ESSPFVERLL	11	1	1	P14625		0	9.76327e+06	0	5.498e-09	2.75509	2	1176.63	-0.162566	64.9033	0	C1203	57.14	A6802	1.2953
High	AQFPNGPQF	15	1	1	Q99595		0	1.37878e+07	0	6.046e-09	2.75404	2	1005.48	-0.275532	59.8288	0	C1203	44.44	B1503	0.0011
High	KKYGVDLIRY	5	1	1	Q6UXN9		0	5.42955e+06	0	2.066e-15	2.75356	3	1254.72	0.123487	39.715	0	C1203	34.29	B1503	0.1609
High	GKAFSQSSY	9	3	3	Q9UNY5;Q8NF99;Q9NQZ8		0	3.00552e+06	0	0.003038	2.75325	2	974.458	-0.1253	26.5375	0	C1203	40.74	B1503	0.1022
High	AQAASQHVF	3	1	1	Q9NQT4		0	2.21355e+06	0	6.129e-07	2.75186	2	958.474	-0.289818	29.1169	0	C1203	40.74	B1503	0.0041
High	AAFRIVVm	19	1	1	Q8WUI4	M8(Oxidation)	0	3.86036e+07	0	0.003252	2.75183	2	922.518	-0.149017	53.6065	0	C1203	80	C1203	0.9346
High	SAFPFPVTV	9	1	1	Q96K37		0	2.19429e+07	0	0.001966	2.75043	2	964.513	-0.557833	85.8465	0	C1203	96.3	C1203	0.0042
High	NLYGSPREY	20	1	1	Q9NZM1		0	9.67482e+07	0	6.571e-06	2.74627	2	1098.52	-0.389257	37.2303	0	C1203	55.56	B1503	0.1427
High	FAISILQQL	16	2	2	Q14240;P60842		0	3.78048e+07	0	0.0001213	2.74387	2	1032.61	-0.156035	89.6788	0	C1203	81.48	C1203	0.0215
High	QAIGAIRTL	8	1	1	Q9H7E9		0	5.19254e+06	0	5.155e-05	2.74323	2	942.573	-0.295744	45.6699	0	C1203	88.89	C1203	0.026
High	HKIDKSHEF	4	1	1	Q9NWV8		0	1.53969e+06	0	4.764e-07	2.74045	2	1140.58	-0.136709	16.7671	0	C1203	37.04	B1503	0.0234
High	SAIDRIFTL	10	1	1	Q86TU7		0	3.90674e+07	0	0.003472	2.74009	2	1035.58	-0.187159	71.2102	0	C1203	85.19	C1203	0.0032
High	KHQPHKVTQY	6	2	2	P83881;Q969Q0		0	3.92801e+06	0	0.0002816	2.7389	3	1265.68	0.224598	15.8972	0	C1203	31.43	B1503	0.2984
High	RKVLTEPEVRY	1	1	1	Q9NYY3		0	7.51312e+06	0	2.906e-05	2.73772	3	1389.78	-0.252736	32.649	0		0	B1503	1.2134
High	FSFPGELLm	69	2	2	P43003;P48664	M9(Oxidation)	0	2.40883e+07	0	1.906e-07	2.73745	2	1056.51	0.135775	84.6361	0	C1203	77.78	C1203	0.0263
High	HTFYNELRV	10	10	10	Q562R1;Q9BYX7;P60709;P68032;P63261;P68133;Q6S8J3;A5A3E0;P0CG38;P0CG39		0	1.24385e+07	0	2.143e-05	2.73595	2	1178.6	-0.041454	44.1942	0	C1203	74.07	A6802	0.0419
High	FSYVTPRAF	7	1	1	Q9Y4E8		0	3.40088e+06	0	0.0001082	2.73588	2	1087.56	-0.304357	56.4417	0	C1203	74.07	C1203	0.0067
High	ITGPLIRIL	19	1	1	Q92616		0	4.11805e+07	0	1.843e-05	2.73199	2	995.661	-0.418917	68.8618	0	C1203	81.48	C1203	0.7313
High	EVSPVSRQSI	7	1	1	Q9H6S3		0	4.66471e+06	0	5.624e-05	2.73099	2	1101.59	-0.35055	35.9395	0	C1203	20	A6802	0.3148
High	KQmEQISQF	10	2	2	P37802;Q9UI15	M3(Oxidation)	0	3.95744e+06	0	0.002065	2.72726	2	1154.55	-0.117259	33.6781	0	C1203	37.04	B1503	0.0022
High	TTIDVRTTF	12	1	1	Q8IY21		0	1.1839e+07	0	0.001209	2.72598	2	1053.56	-0.809711	51.4313	0	C1203	66.67	C1203	0.021
High	TGYIYPRLY	1	1	1	O14656		0	6.91648e+06	0	0.0001142	2.72577	2	1145.6	-0.156092	58.2165	0	C1203	48.15	C1203	0.3626
High	TTISKVSQV	4	1	1	Q9UNX4		0	2.89175e+06	0	0.003267	2.72554	2	962.551	-0.356485	30.7547	0	C1203	74.07	A6802	0.0155
High	TTIEAIHGL	16	1	1	Q92905		0	3.05319e+07	0	2.348e-05	2.72197	2	954.525	-0.268387	49.6473	0	C1203	74.07	A6802	0.004
High	TTTEITHHGT	7	1	1	P15924		0	4.20167e+06	0	0.0004869	2.71985	2	1097.52	-0.164958	17.5219	0	C1203	20	A6802	1.9445
High	QVFPGLLERV	14	1	1	Q9UBB4		0	1.56115e+07	0	4.465e-09	2.71009	2	1157.67	-1.16775	67.2306	0	C1203	40	A6802	0.2207
High	KKFSDSVKSTF	11	1	1	Q9ULG6		0	8.76046e+06	0	2.204e-06	2.70994	3	1273.68	-0.0370936	28.6706	0		0	B1503	0.4049
High	FKIPSNTTL	11	1	1	Q8TEY7		0	4.31528e+07	0	0.0004641	2.70902	2	1020.57	-0.74314	52.6181	0	C1203	51.85	B1503	0.1014
High	KQVKYFIHY	6	1	1	Q9UBU8		0	4.53363e+06	0	0.001986	2.70604	3	1225.67	-0.296026	33.878	0	C1203	40.74	B1503	0.012
High	RKIFPSVIKY	6	1	1	Q8IWV7		0	4895360	0	8.913e-05	2.70504	3	1250.76	-0.0522019	41.9207	0	C1203	34.29	B1503	0.065
High	AKLKKFIAY	13	1	1	P33992		0	1.04029e+07	0	0.002887	2.70146	2	1081.68	-0.850884	31.1158	0	C1203	44.44	B1503	0.0278
High	YmIDPSGVSY	21	1	1	P25788	M2(Oxidation)	0	12357295	0	0.000535	2.70113	2	1147.5	-0.451756	61.569	0	C1203	48.57	B1503	0.0334
High	RHFSKSDSF	2	1	1	Q4FZB7		0	646404	0	0.001512	2.69963	2	1110.53	-0.402635	19.6032	0	C1203	37.04	B1503	0.099
High	FAAFFSHIL	7	1	1	Q86XA9		0	1.64605e+07	0	1.557e-05	2.69957	2	1052.56	0.253596	77.3247	0	C1203	81.48	C1203	0.1805
High	LLYESPERY	10	1	1	Q03518		0	6.62208e+06	0	0.0007993	2.69444	2	1169.58	-0.273326	45.7052	0	C1203	48.15	B1503	0.1254
High	VKAEIRQQF	5	1	1	P30154		0	2.73403e+06	0	0.0002856	2.69331	2	1118.63	-0.291468	30.6171	0	C1203	40.74	B1503	0.0242
High	KKANITFEY	10	1	1	O15372		0	2.05583e+07	0	0.001942	2.6923	2	1113.59	-0.33032	35.6745	0	C1203	44.44	B1503	0.0366
High	KKKTEDEHF	3	1	1	Q9ULW0		0	1.1772e+06	0	0.0002661	2.68956	2	1161.59	-0.227354	15.6381	0	C1203	29.63	B1503	0.6352
High	YGYEHILTL	11	1	1	Q96AX1		0	1.39167e+07	0	4.56e-07	2.68851	2	1108.57	-0.148867	63.7704	0	C1203	59.26	C1203	0.0034
High	NAFASVILF	13	1	1	P26641		0	6.65117e+07	0	0.0005303	2.68599	2	981.54	-0.236942	90.8597	0	C1203	77.78	C1203	0.1134
High	RQKDVKDGKY	4	1	1	P62269		0	464404	0	0.0007352	2.6808	2	1236.67	-0.163486	15.3711	0	C1203	34.29	B1503	0.1723
High	FLYPFPLAL	28	1	1	Q5BJD5		0	9.77809e+07	0	0.003962	2.67789	2	1080.61	-0.819188	104.598	0	C1203	59.26	C1203	0.0127
High	GQFQKIVLY	4	1	1	P53675		0	5.93232e+06	0	0.0002617	2.67547	2	1095.62	-0.616224	55.5813	0	C1203	48.15	B1503	0.0079
High	GKVPVVVSY	2	1	1	Q9Y4C4		0	2.36472e+06	0	4.235e-06	2.67231	2	947.556	-0.196857	46.3717	0	C1203	51.85	B1503	0.0084
High	SQYPFPVTLY	3	1	1	Q5R372		0	5.00321e+06	0	3.708e-08	2.66646	2	1214.61	-0.135774	84.2782	0	C1203	34.29	B1503	0.0041
High	STADVIQHC	9	1	1	Q5SRE5		0	4.24893e+06	0	4.415e-05	2.6662	2	973.441	-0.19718	33.6644	0	C1203	40.74	A6802	0.3628
High	YTFESTIIY	9	1	1	Q4LDE5		0	1.77056e+07	0	0.0007361	2.66411	2	1136.55	-0.0707236	74.8503	0	C1203	81.48	C1203	0.0071
High	LAVPFCVNF	8	1	1	Q9Y266		0	6.44276e+06	0	0.003796	2.66269	2	1009.52	-0.217645	92.8045	0	C1203	77.78	C1203	1.4236
High	RVFPYSVFY	31	1	1	O15118		0	266577527	0	0.0004155	2.66252	2	1177.6	-0.854581	69.706	0	C1203	51.85	C1203	0.0153
High	SQFKGYFIF	18	1	1	Q9NY27		0	5.23493e+07	0	0.001018	2.65955	2	1136.58	0.125832	70.7325	0	C1203	33.33	B1503	0.0094
High	TQmPDPKTF	6	1	1	Q9Y5V0	M3(Oxidation)	0	1.16952e+06	0	0.0001061	2.6579	2	1080.5	-0.0916367	33.0619	0	C1203	48.15	B1503	0.009
High	YAFPKSITVF	10	1	1	P53985		0	3.17448e+07	0	3.5e-09	2.657	2	1172.63	-0.940249	69.9571	0	C1203	77.14	C1203	0.0324
High	YKKGKDSLY	9	2	2	P83881;Q969Q0		0	8.06501e+06	0	3.587e-05	2.65681	2	1101.59	-0.32484	18.3724	0	C1203	44.44	B1503	0.1869
High	EVAELFQRL	36	1	1	Q4V328		0	1.34556e+08	0	0.003358	2.65671	2	1104.6	-0.604492	64.5953	0	C1203	44.44	A6802	0.0205
High	SKYFERHGY	5	1	1	O95786		0	6.10959e+06	0	1.353e-06	2.65311	2	1186.56	-0.196364	22.8027	0	C1203	40.74	B1503	0.0436
High	GKVTGDTVY	6	1	1	Q6UX04		0	3.9259e+06	0	0.0002984	2.65187	2	939.478	-0.155786	28.0286	0	C1203	40.74	B1503	0.0783
High	GQFPFPTAL	2	1	1	Q765P7		0	235227	0	8.362e-08	2.65159	2	977.509	-0.311648	82.7068	0	C1203	51.85	B1503	0.0106
High	GKVKLVVRY	11	1	1	Q9NUP9		0	1.37448e+07	0	3.283e-05	2.64804	2	1061.68	-0.450779	28.9795	0	C1203	44.44	B1503	0.1554
High	YVVPFVAKV	10	1	1	A5YKK6		0	4.78675e+06	0	3.668e-06	2.64475	2	1021.61	-0.339319	63.3893	0	C1203	51.85	A6802	0.0096
High	EILNIFQGV	4	1	1	Q9H0H0		0	8.82725e+06	0	0.001282	2.64432	2	1032.57	-0.15309	88.4594	0	C1203	37.04	A6802	0.0751
High	RKIKVSNTL	5	1	1	P36543		0	1.11672e+07	0	0.003558	2.64084	2	1058.67	-0.195549	21.2808	0	C1203	40.74	B1503	0.0758
High	KGFPHVIYA	11	1	1	Q13485		0	2.65416e+07	0	0.0001693	2.64061	2	1031.57	-0.712878	41.6271	0	C1203	18.52	C1203	0.7882
High	IAFEFPVLV	3	1	1	Q8TDN4		0	1.04762e+07	0	0.003519	2.63989	2	1034.59	0.0573991	100.638	0	C1203	88.89	C1203	0.0325
High	YVTSILQSL	13	1	1	Q69YN4		0	1.54173e+07	0	0.0026	2.63973	2	1023.57	-0.279763	79.7033	0	C1203	44.44	C1203	0.0597
High	SAAGVLIKL	3	1	1	Q6P2E9		0	1.81599e+06	0	0.00326	2.6363	2	871.561	0.0970218	55.7457	0	C1203	85.19	C1203	0.0772
High	VKVVPTVY	7	1	1	Q9Y282		0	4.68402e+06	0	0.0004662	2.6334	2	904.55	-0.182271	45.7845	0	C1203	36.67	B1503	0.4625
High	SAYANAKKY	6	1	1	O60524		0	1.14707e+06	0	0.0006568	2.63165	2	1015.52	-0.122945	18.4169	0	C1203	81.48	C1203	0.0878
High	KLYQSIIGY	14	1	1	Q9NSV4		0	2.81324e+07	0	0.001036	2.6315	2	1084.6	-0.726928	54.6748	0	C1203	48.15	B1503	0.0529
High	HAAHIISEL	14	1	1	Q96I24		0	2.21976e+07	0	0.002727	2.63035	2	990.537	-0.134919	35.6103	0	C1203	85.19	C1203	0.029
High	GKFPSLLTH	24	1	1	P62906		0	2.46303e+08	0	0.003	2.63025	2	999.562	-0.23312	43.323	0	C1203	18.52	B1503	0.9746
High	YAAGVHSVL	7	1	1	O43299		0	8.72514e+06	0	0.001728	2.62897	2	916.489	-0.161825	40.7566	0	C1203	88.89	C1203	0.008
High	KALSRLISF	9	1	1	Q8N8L2		0	5.46493e+07	0	0.003162	2.62677	2	1034.64	-0.543056	53.5288	0	C1203	74.07	C1203	0.0962
High	YGYRQSVTY	6	1	1	P08174		0	5.5009e+06	0	7.766e-09	2.62066	2	1136.54	0.263796	37.0618	0	C1203	51.85	C1203	0.0393
High	RKKPPMNSM	4	1	1	Q01844		0	2.47516e+06	0	0.002604	2.61954	2	1088.57	-0.149987	17.2837	0	C1203	37.04	B1503	0.0375
High	KKIDASQTEF	7	1	1	O94979		0	4.33591e+06	0	0.002551	2.61709	2	1166.61	0.24434	27.8218	0	C1203	34.29	B1503	0.0351
High	EVAGILEPVGL	6	1	1	O95229		0	1.13874e+07	0	2.321e-05	2.61495	2	1096.62	-0.107459	83.3182	0		0	A6802	0.3333
High	AAFDGHAREL	4	1	1	Q3MIP1		0	1.77219e+06	0	0.003396	2.61409	2	1086.53	-0.317587	31.1825	0	C1203	82.86	C1203	0.3533
High	SIYGSYRNF	12	1	1	Q7L576		0	1.16966e+07	0	0.002465	2.61408	2	1106.53	-0.564646	47.1204	0	C1203	40.74	C1203	0.1909
High	FATPFLVVR	15	1	1	P15954		0	8.91557e+07	0	8.719e-05	2.61396	2	1049.61	-0.0933286	66.7645	0	C1203	55.56	C1203	3.519
High	KKIEDLIKY	5	1	1	O75935		0	4.66105e+06	0	2.823e-05	2.60928	2	1149.69	-0.140587	39.6279	0	C1203	44.44	B1503	0.0192
High	KASPLTFTV	8	1	1	P09884		0	1.59117e+07	0	0.003983	2.60852	2	963.551	-0.178975	53.2946	0	C1203	88.89	C1203	0.1183
High	STSDIITRI	18	2	2	P49585;Q9Y5K3		0	3.9082e+08	0	0.003612	2.6079	2	1005.56	-0.726966	50.0011	0	C1203	70.37	A6802	0.0093
High	HVIEKMHHV	4	1	1	Q9BYX4		0	894810	0	5.339e-07	2.60631	2	1129.59	-0.322287	18.0936	0	C1203	40.74	A6802	0.0063
High	IAIPFLIKL	14	1	1	Q8N2K0		0	3.3e+07	0	4.72e-07	2.60597	2	1027.69	-0.254543	87.6703	0	C1203	85.19	C1203	0.0381
High	KQQNPRLVY	8	1	1	O00764		0	4.67049e+06	0	6.776e-05	2.60445	2	1145.64	-0.191785	27.4112	0	C1203	44.44	B1503	0.0037
High	GQAPPGKAL	10	1	1	A8MPP1		0	9.16622e+06	0	0.002529	2.60293	2	838.478	0.309911	24.3391	0	C1203	51.85	B1503	0.0584
High	EVFPDQFIHL	39	1	1	P07686		0	3.26086e+08	0	1.143e-05	2.60254	2	1244.63	-0.0178816	79.1227	0	C1203	40	A6802	0.0767
High	SVADVVRFI	8	1	1	Q9UHJ3		0	6.32353e+06	0	3.946e-07	2.60231	2	1005.57	-0.131135	70.27	0	C1203	44.44	A6802	0.0166
High	YAFPKSITV	24	1	1	P53985		0	3.12148e+08	0	1.076e-07	2.59745	2	1025.57	-0.777915	57.6314	0	C1203	96.3	C1203	0.0014
High	IKDNVVIVY	3	1	1	Q9Y2T2		0	1.58446e+07	0	0.0009557	2.59375	2	1062.62	-0.899192	52.0896	0	C1203	48.15	B1503	0.0687
High	GQYPTQPTY	17	1	1	Q15038		0	1.43281e+08	0	0.0002072	2.59326	2	1054.48	-0.883347	43.6543	0	C1203	51.85	B1503	0.0016
High	EAAEVILRV	66	1	1	P78371		0	2.58238e+09	0	0.0004745	2.59242	2	999.583	-0.0207216	54.3705	0	C1203	88.89	A6802	0.0081
High	QVFEGHTHYV	18	1	1	P35606		0	4.66987e+07	0	0.002497	2.58935	2	1216.57	0.351372	32.542	0	C1203	37.14	A6802	0.0215
High	SSAPTARVF	15	1	1	O94906		0	2.56588e+07	0	6.977e-08	2.58789	2	935.495	0.0685946	37.0566	0	C1203	77.78	C1203	0.1048
High	LPVDIRQYL	3	1	1	P52630		0	3.72154e+06	0	0.0001903	2.58678	2	1116.64	-0.0451533	72.9545	0	C1203	40.74	C1203	0.9833
High	HSVYITSRV	4	1	1	Q8N961		0	4.03969e+06	0	0.001242	2.58661	2	1061.57	-0.749505	30.2324	0	C1203	66.67	A6802	0.052
High	FAHLPKSTF	8	1	1	P26641		0	5.00945e+06	0	0.00252	2.58493	2	1047.56	-0.746814	40.7633	0	C1203	74.07	C1203	0.0247
High	AKYKNQVVY	3	1	1	Q9NVR2		0	1.23479e+06	0	0.003322	2.58202	2	1112.61	-0.201832	24.2125	0	C1203	51.85	B1503	0.0038
High	KKTGKTVSY	3	1	1	O00244		0	1.18919e+06	0	5.95e-05	2.58028	2	1011.58	-0.171828	15.8946	0	C1203	44.44	B1503	0.0228
High	QTVDIRAQL	5	1	1	Q96C10		0	5.69274e+06	0	5.892e-05	2.57882	2	1043.58	-0.382649	47.8173	0	C1203	70.37	A6802	0.0198
High	EVYGSLPAFL	15	1	1	Q01650		0	1.33188e+08	0	0.001052	2.57844	2	1095.57	-0.0567894	87.0268	0	C1203	40	A6802	0.1394
High	AAATSVHVV	4	1	1	Q68EM7		0	2.82713e+06	0	0.0004969	2.57778	2	854.473	0.201136	31.0455	0	C1203	88.89	C1203	0.3109
High	GKFHQESKF	2	1	1	Q562F6		0	361731	0	0.0004209	2.57296	2	1107.56	0.0576383	18.8829	0	C1203	33.33	B1503	0.1501
High	YAFPKAVSVFF	4	1	1	O15427		0	5.16973e+06	0	0.0005774	2.57078	2	1275.68	-0.173828	80.2525	0		0	C1203	0.9612
High	RAIDFSPYL	13	1	1	P17676		0	2.20364e+07	0	4.868e-05	2.56865	2	1081.57	0.191752	64.3098	0	C1203	77.78	C1203	0.0061
High	FAFPLHVDY	13	1	1	Q8TDY4		0	2.89293e+07	0	3.762e-06	2.55587	2	1108.55	0.0640002	72.7118	0	C1203	92.59	C1203	0.0261
High	YLKEFIHIL	10	1	1	Q9NZ32		0	7.92015e+06	0	2.116e-07	2.55542	2	1175.68	0.067489	62.9092	0	C1203	48.15	C1203	0.204
High	FAYGGWNYL	5	1	1	Q01650		0	9.68073e+06	0	0.0009918	2.5545	2	1090.5	-0.640574	80.8017	0	C1203	85.19	C1203	0.0035
High	VALNFIISY	6	2	2	P50616;Q14106		0	3.74407e+07	0	0.0003363	2.55354	2	1039.58	-0.439207	87.7549	0	C1203	85.19	C1203	0.0706
High	EVSQVKETL	9	1	1	P30622		0	1.37934e+07	0	0.0003758	2.54613	2	1032.56	-0.506584	34.096	0	C1203	44.44	A6802	0.1209
High	STFGYVHGV	13	1	1	P38606		0	1.76201e+07	0	0.0006908	2.545	2	966.468	-0.0395186	44.9295	0	C1203	77.78	A6802	0.0026
High	EVYEKPVQV	9	1	1	Q9Y508		0	2.5184e+07	0	1.617e-05	2.5433	2	1090.58	-0.683366	39.1152	0	C1203	51.85	A6802	0.0058
High	SKKPESTSF	8	1	1	Q9BT25		0	3.34645e+06	0	0.0009632	2.54139	2	1010.52	-0.155349	18.7486	0	C1203	37.04	B1503	0.0119
High	ELAEIVFKV	6	1	1	Q9Y2R5		0	1.06456e+07	0	0.0006606	2.5408	2	1047.61	-0.314435	69.7744	0	C1203	48.15	A6802	0.0159
High	YQKQPKIGY	5	1	1	Q68E01		0	2.18232e+06	0	3.169e-06	2.53765	2	1124.61	-0.199679	27.7769	0	C1203	44.44	B1503	0.0059
High	FAFPDEFVF	7	2	2	O14908;Q8TF65		0	1.06322e+07	0	0.0009731	2.5325	2	1118.52	0.176616	99.1839	0	C1203	85.19	C1203	0.0942
High	LILPGYIDF	12	1	1	P12268		0	8.63339e+06	0	0.0003616	2.52974	2	1050.59	-0.0853225	94.195	0	C1203	40.74	B1503	1.1812
High	EAVSFQHFI	7	1	1	Q99598		0	1.09583e+07	0	2.936e-05	2.52875	2	1077.54	-0.214275	61.7048	0	C1203	70.37	A6802	0.0811
High	RKLDPPGGQFY	20	1	1	O95400		0	3.23153e+07	0	2.603e-09	2.52309	2	1277.66	0.0897404	40.4561	0		0	B1503	0.5857
High	MVVDIVQEL	15	1	1	O00764		0	7.33366e+07	0	8.96e-07	2.52016	2	1045.56	-0.242347	81.8303	0	C1203	48.15	A6802	0.0082
High	EVIDFSHGL	28	3	3	Q96GS6;Q5VST6;Q6PCB6		0	3.47146e+08	0	5.272e-08	2.51678	2	1016.5	-0.273619	61.2079	0	C1203	40.74	A6802	0.0026
High	EVIRDVINV	16	1	1	Q6IEG0		0	4.32637e+07	0	0.001613	2.51675	2	1056.6	-0.400892	55.659	0	C1203	44.44	A6802	0.0084
High	LSADIFQQV	10	1	1	O94916		0	2.46226e+07	0	0.002007	2.51174	2	1020.54	-0.261725	73.3688	0	C1203	74.07	A6802	0.0684
High	RQLEDILSTY	11	1	1	P40222		0	1.47307e+07	0	1.012e-05	2.51127	2	1237.64	-0.255266	61.5184	0	C1203	28.57	B1503	0.0124
High	ETFAFQAEI	12	5	5	Q58FF8;Q58FF7;Q14568;P07900;P08238		0	8.61293e+07	0	0.001118	2.51021	2	1055.5	-0.23999	75.0141	0	C1203	66.67	A6802	0.0102
High	KKIELDVKY	4	1	1	Q9UHR4		0	1.9586e+06	0	0.0002876	2.50675	2	1135.67	-0.335283	34.1785	0	C1203	44.44	B1503	0.0326
High	KKFNEPGSQY	2	1	1	P51531		0	946938	0	0.001801	2.5042	2	1197.59	0.29748	24.1158	0	C1203	40	B1503	0.0373
High	DVAQIFNNIL	1	1	1	Q9Y376		0	754566	0	0.002597	2.50378	2	1146.62	0.960545	99.8967	0	C1203	28.57	A6802	0.6139
High	RKLDQVSQF	10	1	1	O60502		0	1.67553e+07	0	0.001045	2.5028	2	1120.61	-0.30162	31.9626	0	C1203	37.04	B1503	0.0086
High	ESFEKAYQV	11	1	1	Q86V86		0	2.12828e+07	0	5.509e-05	2.48688	2	1100.53	-0.309857	42.3395	0	C1203	74.07	A6802	0.0087
High	GKPGHLQFY	3	1	1	Q8IWA0		0	2.77364e+06	0	0.002881	2.4866	2	1046.54	-0.374438	33.5784	0	C1203	40.74	B1503	0.7703
High	RLFGTTVTF	17	1	1	Q15904		0	8.87154e+07	0	0.001661	2.46319	2	1041.57	-0.351397	61.3	0	C1203	44.44	B1503	0.0118
High	KKIDRHMYH	1	1	1	P84098		0	1.18867e+06	0	4.247e-05	2.4618	3	1227.64	0.160051	16.0277	0	C1203	3.7	B1503	1.8626
High	FAFEEAIGY	1	1	1	Q96G03		0	662498	0	0.001184	2.45917	2	1046.48	-0.255796	77.078	0	C1203	88.89	C1203	0.0291
High	LQRLENTQY	5	1	1	Q96D70		0	1.5412e+06	0	4.388e-05	2.44923	2	1164.6	-0.0306486	34.5614	0	C1203	37.04	B1503	0.0108
High	GKEKLPRYY	17	1	1	P62280		0	1.71257e+07	0	0.002379	2.44523	2	1153.64	-0.573416	25.4199	0	C1203	44.44	B1503	0.9198
High	IIVDIFHGL	6	1	1	Q9Y4E8		0	5.13986e+06	0	7.16e-07	2.42656	2	1026.6	0.260122	79.3846	0	C1203	40.74	A6802	0.0896
High	GQWKSITLF	3	1	1	P07996		0	2.73496e+06	0	0.002589	2.41743	2	1079.59	-0.0229671	65.6701	0	C1203	33.33	B1503	0.0162
High	EVILIDPFHKA	1	1	1	P61313		0	1.93158e+06	0	0.0002434	2.41506	2	1281.72	-0.055338	60.6071	0		0	A6802	0.5592
High	KLAPPSSTL	1	1	1	Q7Z3B3		0	2.99315e+06	0	6.668e-05	2.41489	2	913.535	-0.361844	38.7704	0	C1203	51.85	C1203	0.1281
High	FSFPSIFIY	4	1	1	O43913		0	3.86167e+07	0	8.753e-08	2.41467	2	1120.57	-0.375567	102.299	0	C1203	85.19	C1203	0.0236
High	SAMPTVRSF	12	1	1	Q03518		0	2.49848e+07	0	0.001135	2.41409	2	995.498	-0.265267	45.6623	0	C1203	81.48	C1203	0.0052
High	SQFINFPIY	2	1	1	P14625		0	1.95292e+06	0	0.003723	2.39563	2	1128.57	-0.338673	86.4374	0	C1203	40.74	B1503	0.0109
High	ASYPELRLF	14	1	1	O75718		0	6.01538e+07	0	8.276e-11	2.39156	2	1095.58	-0.056361	68.857	0	C1203	77.78	C1203	0.1506
High	ELFTGFIKV	13	1	1	Q86TM6		0	4.55953e+07	0	0.001496	2.38133	2	1053.6	-0.244354	74.1418	0	C1203	44.44	A6802	0.114
High	SAIPHPLIm	17	1	1	P61201	M9(Oxidation)	0	2.29151e+07	0	3.056e-05	2.37862	2	994.538	-0.937886	51.0231	0	C1203	81.48	C1203	0.0063
High	SQFHGLITHY	4	1	1	Q92845		0	3.13135e+06	0	3.419e-06	2.378	3	1202.6	0.0833896	41.8006	0	C1203	42.86	B1503	0.0242
High	YKLDKQHTF	6	1	1	P55884		0	2.66864e+06	0	0.002854	2.37175	2	1179.62	-0.053505	26.758	0	C1203	40.74	B1503	0.0147
High	RKIANSDKY	3	1	1	O75164		0	525813	0	0.0003661	2.37029	2	1094.59	-0.611376	16.1283	0	C1203	37.04	B1503	0.0606
High	RQFPTAFEF	15	1	1	Q13614		0	1.64649e+07	0	9.974e-06	2.36646	2	1142.56	0.2702	63.7864	0	C1203	44.44	B1503	0.0057
High	FAIPLIEKL	4	1	1	Q9NR30		0	6.42232e+06	0	2.895e-06	2.35151	2	1043.65	0.0677553	78.7313	0	C1203	88.89	C1203	0.0276
High	LKSVNELIY	8	1	1	P18124		0	4.08897e+07	0	0.0001657	2.3426	2	1078.61	-0.806944	53.6738	0	C1203	44.44	B1503	0.4351
High	ALFRTIITY	8	2	2	P29992;P50148		0	8.25824e+06	0	0.002126	2.34081	2	1097.64	-0.0818077	65.1966	0	C1203	55.56	B1503	0.047
High	ETFNDFVRL	11	1	1	O43913		0	2.33518e+07	0	0.0001322	2.33601	2	1140.57	-0.573993	67.3077	0	C1203	74.07	A6802	0.019
High	KKIEFGVVY	8	1	1	P29218		0	7.06944e+06	0	0.0008418	2.33107	2	1082.62	-0.510181	44.929	0	C1203	48.15	B1503	0.0033
High	KKNKDNVKF	3	1	1	P63173		0	1.66412e+06	0	0.00143	2.32547	2	1120.65	0.0135332	15.9866	0	C1203	33.33	B1503	0.0373
High	SSFPTVVIY	16	1	1	Q9HCN4		0	1.63863e+08	0	9.916e-06	2.31335	2	1012.53	-0.282195	76.7685	0	C1203	85.19	C1203	0.0227
High	DIFPIVIHV	13	1	1	Q9BXL6		0	4.55298e+07	0	0.0003703	2.31234	2	1052.61	-0.46587	85.8127	0	C1203	55.56	A6802	0.0096
High	NTIPFIIRY	16	1	1	Q8N5C6		0	1.08674e+08	0	0.0008127	2.30667	2	1136.65	-0.325236	68.8138	0	C1203	81.48	C1203	0.1253
High	EIAEAYLGYPV	6	1	1	P08107		0	1.21681e+07	0	3.542e-06	2.30323	2	1224.61	0.0591145	76.115	0		0	A6802	1.2683
High	QKFLQGLVY	12	1	1	Q5J8M3		0	3.12457e+07	0	0.001242	2.28996	2	1095.62	-0.504807	60.5876	0	C1203	48.15	B1503	0.0525
High	RLIPHVQVF	2	1	1	Q9HD20		0	6.2338e+06	0	5.736e-08	2.27584	2	1108.66	-1.18956	51.2607	0	C1203	44.44	B1503	0.0042
High	FTITPPTAQV	8	1	1	P52907		0	1.25433e+07	0	0.0001811	2.22748	2	1074.58	-0.204758	67.6744	0	C1203	51.43	A6802	0.022
High	EVFEKATFI	15	1	1	P19338		0	6.37316e+07	0	0.003369	2.227	2	1083.57	-0.629925	57.9397	0	C1203	37.04	A6802	0.0158
High	EIFDGNVAHI	5	1	1	P46939		0	7.49249e+06	0	0.003776	2.22104	2	1114.55	-0.0173399	58.2927	0	C1203	31.43	A6802	0.0393
High	KQLAEYRKY	1	1	1	O94955		0	847016	0	0.003751	2.1977	3	1198.66	0.221032	21.2915	0	C1203	40.74	B1503	0.0147
High	NGAPVVRIY	4	1	1	Q96EN8		0	2.30479e+06	0	0.0003029	2.19515	2	988.557	-0.18484	45.8968	0	C1203	55.56	C1203	0.6056
High	GQYSPPPYSEY	1	1	1	Q96BY9		0	5.82723e+06	0	0.001074	2.18362	2	1287.55	0.159073	53.5274	0		0	B1503	0.0875
High	QAFPLIIKL	12	1	1	Q14CZ7		0	3.58792e+07	0	0.002377	2.17476	2	1042.67	-0.155579	77.4441	0	C1203	92.59	C1203	0.0287
High	ETFDFVHNV	11	1	1	Q96E29		0	3.05189e+07	0	0.003216	2.16985	2	1107.51	-0.702546	59.6127	0	C1203	77.78	A6802	0.001
High	AQVPFEQIL	16	1	1	Q99828		0	1.55687e+08	0	0.0002164	2.1343	2	1044.57	-0.385054	79.2836	0	C1203	48.15	B1503	0.1391
High	GKLIIWDSY	3	3	3	P62873;P62879;Q9HAV0		0	2.74225e+06	0	0.001575	2.13391	2	1094.59	-0.0465983	64.2511	0	C1203	37.04	B1503	1.0181
High	EVFFKEIFL	6	2	2	Q9Y6D6;Q9Y6D5		0	9.39471e+06	0	0.000195	2.13242	2	1171.64	-0.0112607	81.3701	0	C1203	44.44	A6802	0.0757
High	EVAKVIVSm	11	1	1	Q99996	M9(Oxidation)	0	4.24306e+06	0	0.0002381	2.12888	2	991.549	0.181307	36.9663	0	C1203	40.74	A6802	0.0296
High	TVIAKVNNV	9	1	1	P26639		0	7.365e+06	0	0.002228	2.11501	2	957.572	-0.318483	34.7187	0	C1203	40.74	A6802	0.0132
High	EVISGKQEGV	5	2	2	Q9Y227;Q9NQZ7		0	2.54683e+06	0	0.001338	2.11434	2	1045.55	0.41389	29.3302	0	C1203	28.57	A6802	0.1576
High	HVIDLDDATFL	11	1	1	Q8N8R7		0	2.87666e+07	0	5.543e-07	2.08798	2	1258.63	0.246431	74.6673	0		0	A6802	1.319
High	IALPSLRIL	16	1	1	P00403		0	7.83097e+07	0	0.0003969	2.0843	2	995.661	-0.357616	75.5189	0	C1203	85.19	C1203	0.1144
High	ETYPDPVRV	30	1	1	P49588		0	4.36515e+08	0	0.00018	2.01711	2	1075.54	-0.769916	46.5437	0	C1203	85.19	A6802	0.0048
High	RVYPQAVYF	12	1	1	Q9Y4A5		0	7.30227e+07	0	0.001061	1.85309	2	1142.6	-0.035478	54.5615	0	C1203	44.44	C1203	0.0071
High	EVIGKITAL	9	1	1	O43264		0	3.54624e+07	0	2.02e-05	1.84975	2	943.582	-0.440403	53.5682	0	C1203	44.44	A6802	0.0198
High	KKFEKDGERFY	1	1	1	O60890		0	441339	0	0.0001999	1.82515	3	1446.74	0.163717	23.2733	0		0	B1503	0.9432
High	MKFIDNTLY	2	1	1	Q14116		0	3.15942e+06	0.001	0.004834	3.37272	2	1144.57	-0.128485	59.6504	0	C1203	40.74	B1503	0.0414
High	AQLHPLSGY	4	1	1	Q7L7V1		0	1.66723e+06	0.001	0.005946	3.13305	2	985.51	-0.311556	41.3242	0	C1203	40.74	B1503	0.0144
High	GKNPDEVSY	8	1	1	O95391		0	7.00058e+06	0.001	0.005534	3.09062	2	1008.46	-0.117937	27.801	0	C1203	48.15	B1503	0.077
High	VKGVSLSSY	5	1	1	Q9Y3B1		0	2.98774e+06	0.001	0.007654	3.09007	2	939.514	-0.353917	39.9246	0	C1203	40.74	B1503	0.2068
High	YKKGDANTY	1	1	1	Q9NVX7		0	431746	0.001	0.007881	3.08954	2	1059.51	0.206214	16.5941	0	C1203	48.15	B1503	0.0279
High	HSVYIPNKV	8	1	1	Q8TB22		0	2.86636e+06	0.001	0.00878	3.02445	2	1056.58	-0.130238	33.9977	0	C1203	70.37	A6802	0.094
High	RKNPVTSTY	8	1	1	Q13131		0	1.17307e+07	0.001	0.004989	3.00386	2	1065.57	-0.561641	21.3307	0	C1203	48.15	B1503	0.0024
High	ETIIDTKGV	6	1	1	Q9GZS1		0	4.33867e+06	0.001	0.005852	2.97801	2	975.535	-0.373483	42.2884	0	C1203	70.37	A6802	0.0365
High	FLLDGSANV	3	1	1	P12111		0	1.2961e+07	0.001	0.006761	2.97278	2	935.483	-0.192884	69.9287	0	C1203	44.44	A6802	0.3426
High	TTVEIFNKL	12	1	1	Q96QK1		0	4.20874e+08	0.001	0.005466	2.95866	2	1064.6	-0.459488	58.5602	0	C1203	70.37	A6802	0.0152
High	GKREGIDQSY	3	1	1	O94952		0	1.05416e+06	0.001	0.007782	2.95146	2	1152.56	-0.460649	21.65	0	C1203	40	B1503	0.245
High	HATDVLHAV	8	2	2	Q14432;Q13370		0	2.52628e+06	0.001	0.00556	2.93579	2	962.505	-0.213727	34.4068	0	C1203	77.78	A6802	0.0167
High	TVSEVIQGL	9	1	1	Q8WWW0		0	3.14898e+06	0.001	0.008311	2.93538	2	945.525	-0.438342	65.0684	0	C1203	48.15	A6802	0.0154
High	AAYLRALSL	6	1	1	O15294		0	4.55206e+06	0.001	0.00565	2.93514	2	977.577	-0.888287	59.4714	0	C1203	85.19	C1203	0.0112
High	EIYNGKLFDL	12	1	1	Q99661		0	1.31416e+07	0.001	0.004728	2.91987	2	1211.63	-0.543746	69.5222	0	C1203	37.14	A6802	1.3597
High	GKAPGAEEY	4	1	1	P09543		0	4.37456e+06	0.001	0.005115	2.91362	2	921.431	-0.220774	22.4222	0	C1203	51.85	B1503	0.0978
High	GKAEVAVTLY	3	1	1	Q9NSG2		0	4.35305e+06	0.001	0.004013	2.90841	2	1050.58	-0.209436	47.8435	0	C1203	28.57	B1503	0.256
High	AKPEYISKTY	3	1	1	Q13823		0	1.27222e+06	0.001	0.005217	2.89467	3	1199.63	0.117696	28.4636	0	C1203	31.43	B1503	0.4421
High	GVVDIFQTV	9	2	2	P23468;Q13332		0	4.04613e+07	0.001	0.005223	2.89222	2	977.53	-0.0115586	81.6328	0	C1203	44.44	A6802	0.0738
High	FKVGDPEEY	6	1	1	Q8WYP3		0	5.61256e+06	0.001	0.008816	2.8911	2	1083.5	-0.0425687	45.2501	0	C1203	51.85	B1503	0.3282
High	AAYYHPSYL	2	1	1	Q14687		0	9.00475e+06	0.001	0.007639	2.86805	2	1084.51	-0.345121	46.6524	0	C1203	85.19	C1203	0.0061
High	SVVELVNKL	13	1	1	Q9BQE5		0	1.87736e+07	0.001	0.005156	2.84235	2	1000.6	-0.512943	59.5013	0	C1203	44.44	A6802	0.0721
High	KKYGEALGIKY	3	1	1	Q9UHL9		0	1.05361e+06	0.001	0.008148	2.84022	3	1269.72	0.0935098	34.7729	0		0	B1503	0.4254
High	GKFQDNFEF	10	2	2	Q15691;Q9UPY8		0	1.2174e+07	0.001	0.004789	2.83337	2	1131.51	-0.588599	55.3863	0	C1203	37.04	B1503	0.0536
High	YTFFTPNNI	18	1	1	P17844		0	2.0666e+08	0.001	0.00562	2.82558	2	1116.54	-0.549298	75.6023	0	C1203	70.37	A6802	0.0343
High	KKLSSPSNY	2	1	1	Q13325		0	655802	0.001	0.007232	2.82435	2	1023.55	-0.157073	19.8849	0	C1203	44.44	B1503	0.0581
High	DVYSGTPTKV	4	1	1	Q14493		0	6.98262e+06	0.001	0.004913	2.80015	2	1066.54	-0.686534	39.0078	0	C1203	40	A6802	0.151
High	AKFGNKEEY	1	1	1	Q9UJF2		0	494096	0.001	0.008577	2.79681	2	1085.53	-0.514899	21.404	0	C1203	51.85	B1503	0.0282
High	YLYGQTTTY	6	1	1	P11388		0	7.82302e+06	0.001	0.005835	2.78868	2	1109.51	-0.459124	52.0385	0	C1203	51.85	B1503	0.0076
High	TVFSHAQTV	8	2	2	Q71UM5;P42677		0	1.28365e+07	0.001	0.004697	2.78743	2	989.505	-0.296066	34.0066	0	C1203	48.15	A6802	0.0314
High	GKLVALHTF	1	1	1	Q6SJ93		0	1.34917e+06	0.001	0.005463	2.76795	2	985.583	0.0853416	41.4227	0	C1203	33.33	B1503	0.1761
High	EIFSKNYRV	10	1	1	Q9NVU0		0	1.49915e+07	0.001	0.006297	2.74714	2	1155.62	-0.274534	37.5633	0	C1203	44.44	A6802	0.0224
High	HVGDIIKEV	12	2	2	Q14168;Q9NZW5		0	30450131	0.001	0.007453	2.72611	2	1009.57	-1.01361	41.644	0	C1203	51.85	A6802	0.0853
High	KQKDIVSIHY	1	1	1	P48200		0	1.03162e+06	0.001	0.005482	2.72465	3	1230.68	-0.210661	32.347	0	C1203	34.29	B1503	0.0318
High	MKIPTGQEY	1	1	1	Q13557		0	1.7456e+06	0.001	0.005222	2.72222	2	1066.52	0.0468904	42.7166	0	C1203	48.15	B1503	0.0095
High	EVFGVIRSL	1	1	1	Q15393		0	1.21476e+07	0.001	0.007503	2.71398	2	1019.59	-0.453165	64.6535	0	C1203	51.85	A6802	0.0286
High	HKRIHGVGF	9	1	1	P62899		0	6.9435e+06	0.001	0.004025	2.713	2	1050.6	-0.0901554	22.0192	0	C1203	33.33	B1503	0.105
High	SISDVIAQV	21	1	1	Q9HCJ1		0	9.73743e+07	0.001	0.005715	2.71282	2	931.509	-0.156007	69.7538	0	C1203	48.15	A6802	0.01
High	QQVLLKVLY	2	1	1	O95373		0	1.94318e+06	0.001	0.008422	2.69673	2	1103.68	-0.149314	62.6068	0	C1203	40.74	B1503	0.274
High	GKSGVAITF	5	1	1	Q9BUQ8		0	2.97502e+06	0.001	0.007192	2.69502	2	879.493	-0.179158	45.6456	0	C1203	44.44	B1503	0.0385
High	SAYARLIDY	7	1	1	P34897		0	2.89778e+07	0.001	0.005389	2.69462	2	1071.55	-0.0361172	52.4769	0	C1203	81.48	C1203	0.0352
High	KKFASFNAY	5	1	1	Q969S3		0	5.50085e+06	0.001	0.006747	2.69428	2	1075.56	-0.648238	34.1097	0	C1203	40.74	B1503	0.0068
High	TTVDINTQV	3	1	1	Q14676		0	2.76957e+07	0.001	0.0059	2.69023	2	990.509	-1.24333	50.141	0	C1203	70.37	A6802	0.0027
High	QVANVRFNV	6	1	1	P30154		0	1.28885e+07	0.001	0.004158	2.68174	2	1046.57	-0.054484	46.582	0	C1203	40.74	A6802	0.015
High	TASPVIKAV	14	1	1	Q8WU10		0	1.1974e+08	0.001	0.006043	2.6807	2	885.541	0.0819921	36.839	0	C1203	92.59	A6802	0.084
High	EVAALIRSL	12	1	1	Q6P2Q9		0	2.88906e+07	0.001	0.004327	2.67223	2	971.588	-0.412732	61.1364	0	C1203	48.15	A6802	0.0378
High	EIASITEQL	6	1	1	Q5UIP0		0	3.05814e+07	0.001	0.006707	2.672	2	1003.53	-0.156605	63.8484	0	C1203	44.44	A6802	0.0153
High	FAYDGKDYL	5	12	12	P13747;P30462;P18463;Q95365;P30475;Q29836;Q31612;P30504;Q9TNN7;P30505;Q95604;Q29865		0	1.05848e+07	0.001	0.008484	2.66904	2	1091.5	0.121759	54.2705	0	C1203	85.19	C1203	0.0064
High	AGYQHIRmY	6	1	1	Q9BVC4	M8(Oxidation)	0	2.56316e+06	0.001	0.008254	2.65243	2	1154.54	0.227913	28.0709	0	C1203	51.85	C1203	0.1959
High	GKGKFGNVY	8	3	3	O14965;Q96GD4;Q9UQB9		0	7.4484e+06	0.001	0.005796	2.64944	2	969.515	-0.288895	24.0463	0	C1203	40.74	B1503	0.0932
High	DVAEFLYQV	14	1	1	Q9Y5M8		0	3.59349e+07	0.001	0.006114	2.64895	2	1083.54	-0.0453792	88.7774	0	C1203	44.44	A6802	0.0045
High	TTADVNEKNLL	1	1	1	Q6ZNB6		0	2.16287e+06	0.001	0.005495	2.64237	2	1217.64	0.295277	43.5984	0		0	A6802	0.6366
High	YAYEKPHVV	2	1	1	Q15751		0	1.23395e+06	0.001	0.008633	2.6377	2	1105.57	-0.56722	32.196	0	C1203	92.59	C1203	0.0033
High	STVEVIFHV	11	2	2	Q6GYQ0;Q2PPJ7		0	1.23748e+07	0.001	0.006788	2.61752	2	1030.56	-0.119427	63.646	0	C1203	74.07	A6802	0.0036
High	GKFGITSAF	1	1	1	Q9H015		0	6.70045e+06	0.001	0.005287	2.61434	2	927.493	-0.169886	54.099	0	C1203	37.04	B1503	0.0125
High	GQVTFLHVF	6	1	1	Q9BW60		0	3.54963e+06	0.001	0.00549	2.60069	2	1047.56	-0.164174	68.0885	0	C1203	33.33	B1503	0.0616
High	SVSAVIVRA	9	1	1	Q68CR1		0	6.55611e+06	0.001	0.008238	2.59657	2	901.546	-0.241826	40.0055	0	C1203	11.11	A6802	0.1134
High	VAADILNRL	1	1	1	O60673		0	2.4492e+06	0.001	0.006181	2.59122	2	984.583	-0.356204	58.5729	0	C1203	85.19	C1203	0.0292
High	SKTGGYLVY	3	1	1	P46087		0	4.48831e+06	0.001	0.005761	2.57307	2	987.514	-0.264781	42.0527	0	C1203	48.15	B1503	0.0282
High	KRFEPGTQRF	2	1	1	Q70IA8		0	1.67084e+06	0.001	0.004006	2.57283	3	1265.68	0.120659	25.3788	0	C1203	45.71	B1503	0.0815
High	EIFSRGPYSV	6	1	1	Q7LBC6		0	7.34873e+06	0.001	0.005458	2.56966	2	1154.58	-0.262837	52.4581	0	C1203	40	A6802	0.1114
High	SIIGRLLEV	5	1	1	P62136		0	7.33043e+06	0.001	0.007933	2.56776	2	999.62	-0.206944	71.1977	0	C1203	48.15	A6802	0.122
High	FQYDSTHGKF	4	1	1	P04406		0	2.81208e+06	0.001	0.007277	2.53918	3	1229.56	-0.0695111	34.6512	0	C1203	45.71	B1503	0.0368
High	GKFHSIVRL	7	1	1	O00567		0	3.2085e+06	0.001	0.006781	2.53885	2	1056.63	-0.39212	32.214	0	C1203	48.15	B1503	0.5551
High	GKYASIILF	19	1	1	Q8TCB0		0	9.86716e+07	0.001	0.006161	2.53883	2	1011.59	-0.475168	67.4153	0	C1203	40.74	B1503	0.034
High	ELSDIAHRI	4	1	1	P04075		0	3.01875e+06	0.001	0.005351	2.53782	2	1053.57	-0.355294	42.2859	0	C1203	37.04	A6802	0.0569
High	FASTILHLV	15	1	1	P61803		0	3.41501e+07	0.001	0.004817	2.53773	2	1000.58	-0.0641326	67.381	0	C1203	81.48	A6802	0.045
High	LQRATGISF	1	1	1	Q15393		0	2.00465e+06	0.001	0.007562	2.52965	2	992.552	-0.292894	44.2848	0	C1203	33.33	B1503	0.004
High	KAYGKAKSI	2	2	2	Q99613;B5ME19		0	446135	0.001	0.005475	2.52891	2	965.578	-0.140794	16.162	0	C1203	77.78	C1203	0.0613
High	EIFADPRTV	9	1	1	Q92871		0	1.10743e+07	0.001	0.0057	2.52383	2	1047.54	-2.27965	50.601	0	C1203	51.85	A6802	0.1054
High	GKIIKPLQY	9	1	1	Q13823		0	8.74457e+06	0.001	0.005656	2.52127	2	1059.66	-0.64945	36.1868	0	C1203	44.44	B1503	0.1046
High	ETFEKTPVEV	4	1	1	Q15149		0	3.26573e+06	0.001	0.007999	2.52044	2	1178.59	0.0343115	46.7327	0	C1203	57.14	A6802	0.0202
High	AKYLPHSAGRY	5	1	1	P46782		0	1.08325e+06	0.001	0.004316	2.51196	3	1262.66	-0.0686786	23.9568	0		0	B1503	0.9329
High	SAYDHVRKT	1	1	1	P27361		0	1.3523e+06	0.001	0.007339	2.5098	2	1076.55	-0.429278	16.5458	0	C1203	51.85	C1203	0.6615
High	FASHVSPEV	15	1	1	Q9NP61		0	4.82414e+07	0.001	0.005183	2.49596	2	972.478	-0.500122	37.3115	0	C1203	85.19	A6802	0.0842
High	TLFGSVIRY	7	1	1	P09871		0	5.42451e+06	0.001	0.00601	2.49533	2	1055.59	-0.476584	63.6451	0	C1203	51.85	B1503	0.1246
High	MTADSRSQV	11	1	1	P60900		0	5.57988e+06	0.001	0.004222	2.49475	2	994.462	-0.311363	21.6973	0	C1203	74.07	A6802	0.0169
High	DTTYINHVV	30	1	1	Q9UBR2		0	2.39244e+08	0.001	0.005828	2.49451	2	1061.53	-0.622694	47.7382	0	C1203	70.37	A6802	0.0533
High	HTILIVEKV	4	1	1	Q8TD19		0	1.17001e+07	0.001	0.004297	2.49311	2	1051.65	-0.931191	43.5769	0	C1203	70.37	A6802	0.0187
High	SALEVPRLY	4	1	1	Q14746		0	2.278e+06	0.001	0.005497	2.49095	2	1047.58	-0.291995	60.8155	0	C1203	85.19	C1203	0.0851
High	RAFGIPIRV	29	1	1	P06493		0	5.73619e+08	0.001	0.00562	2.48514	2	1028.63	-1.56331	51.3465	0	C1203	88.89	C1203	0.0166
High	ETFNTPAmYV	46	7	7	Q9BYX7;P60709;P63261;Q6S8J3;A5A3E0;P0CG38;P0CG39	M8(Oxidation)	0	1.46236e+08	0.001	0.007929	2.4759	2	1188.52	0.0178546	60.8559	0	C1203	48.57	A6802	0.0227
High	RAYPTVKFY	3	1	1	Q8IXB1		0	5.01385e+06	0.001	0.006698	2.47547	2	1144.62	0.0493905	43.2968	0	C1203	92.59	C1203	0.0143
High	LSFPYSYEV	4	1	1	Q53EP0		0	3.57029e+06	0.001	0.005367	2.47375	2	1104.52	-0.325605	76.9061	0	C1203	81.48	A6802	0.1829
High	WQKGIGEFF	3	1	1	Q15004		0	5.09897e+06	0.001	0.006453	2.47077	2	1111.56	0.672594	63.8074	0	C1203	33.33	B1503	0.1056
High	FKNPIIEKY	2	1	1	P00973		0	2.51978e+06	0.001	0.006714	2.4636	2	1151.65	-0.14045	42.421	0	C1203	51.85	B1503	0.0386
High	mTPEIIQKL	39	1	1	Q9UMS4	M1(Oxidation)	0	4.15748e+07	0.001	0.007917	2.45985	2	1088.6	-0.755476	52.7549	0	C1203	74.07	A6802	0.0397
High	AAFEKALEV	7	1	1	Q13325		0	1.09485e+07	0.001	0.005291	2.4505	2	977.53	0.0406496	49.7136	0	C1203	92.59	C1203	0.0125
High	KKLPKGTVSF	4	1	1	O75534		0	2.0488e+06	0.001	0.007001	2.44747	2	1104.68	-0.619021	25.6464	0	C1203	34.29	B1503	0.052
High	RKKPTTEGF	5	1	1	Q03111		0	4.95284e+06	0.001	0.00498	2.43953	2	1063.59	-1.02934	17.5071	0	C1203	37.04	B1503	0.0347
High	GKYFDKASY	2	1	1	P29401		0	1.56734e+06	0.001	0.008246	2.43533	2	1078.52	-0.319113	29.993	0	C1203	40.74	B1503	0.0216
High	EAFHYIFNV	9	1	1	Q9UEY8		0	4.10837e+08	0.001	0.006295	2.42823	2	1139.55	-0.00153405	69.496	0	C1203	81.48	A6802	0.0266
High	SKHRAQVIY	4	1	1	P62851		0	1.57032e+06	0.001	0.008035	2.41345	2	1101.62	-0.33306	19.1274	0	C1203	40.74	B1503	0.0587
High	EISSILQEL	14	2	2	Q96L14;Q5SW79		0	3.93868e+07	0.001	0.007115	2.40263	2	1031.56	-0.141652	83.7897	0	C1203	48.15	A6802	0.0689
High	IGVEHVVVY	4	1	1	P49411		0	4.73013e+07	0.001	0.006882	2.39064	2	1014.56	-1.27821	50.941	0	C1203	51.85	C1203	0.1241
High	YAYDGKDYI	7	17	17	P01892;P30447;P05534;P10316;P01889;P30460;Q04826;P30479;P30480;P30486;P18464;P30490;P30498;Q31610;P30499;P04222;P17693		0	4.1013e+06	0.001	0.007722	2.38448	2	1107.5	-0.345223	46.5649	0	C1203	77.78	C1203	0.0099
High	FAMPYFIQV	5	1	1	Q00610		0	7.13261e+06	0.001	0.006744	2.3793	2	1115.56	-0.187888	93.3051	0	C1203	88.89	C1203	0.0468
High	YAKDDPLEF	6	1	1	P06756		0	9.48687e+06	0.001	0.005739	2.37877	2	1097.51	-0.509701	53.0083	0	C1203	85.19	C1203	0.028
High	STVSIQIKL	11	1	1	O60502		0	1.76252e+07	0.001	0.006084	2.37444	2	988.603	-0.570792	58.7148	0	C1203	74.07	A6802	0.0859
High	GQLPGLHEY	7	1	1	Q8TAT6		0	1.20912e+07	0.001	0.00541	2.3662	2	1013.51	0.0120539	45.5364	0	C1203	48.15	B1503	0.0052
High	KAPDFVFYA	6	3	3	P15311;P26038;P35241		0	1.29184e+07	0.001	0.005916	2.36589	2	1057.53	-0.485717	61.4255	0	C1203	44.44	A6802	0.6386
High	DTFYVQVLV	17	1	1	Q5BJD5		0	2.58563e+07	0.001	0.004837	2.35663	2	1083.57	-0.273501	90.23	0	C1203	74.07	A6802	0.0353
High	SVYDGHGGEEV	5	1	1	O15355		0	2.00746e+06	0.001	0.005272	2.35509	2	1148.49	0.336219	33.5132	0		0	A6802	0.6841
High	ETAAFIERL	7	1	1	Q5UCC4		0	1.79137e+06	0.001	0.006085	2.34992	2	1049.56	-0.670806	55.838	0	C1203	74.07	A6802	0.0152
High	RKDEDRKQF	1	1	1	Q9Y3T9		0	395916	0.001	0.007752	2.34148	3	1221.63	0.446988	15.5968	0	C1203	37.04	B1503	0.3609
High	HNAGISFSV	9	1	1	P40692		0	2.51134e+07	0.001	0.006417	2.33021	2	931.463	-0.390903	48.7845	0	C1203	44.44	A6802	0.2808
High	QKYAGKDGY	4	1	1	P31949		0	1.35839e+06	0.001	0.007203	2.32489	2	1029.5	-0.320459	17.887	0	C1203	40.74	B1503	0.2254
High	KKVVKETSY	2	1	1	Q9NZJ7		0	549804	0.001	0.004415	2.3233	2	1081.62	-0.273451	16.1352	0	C1203	37.04	B1503	0.0679
High	ETAAIFHYL	6	1	1	Q13535		0	4.4185e+06	0.001	0.008136	2.31674	2	1064.54	-0.541414	66.5482	0	C1203	70.37	A6802	0.0029
High	KLYPLEIVF	6	1	1	Q9NQT5		0	4.89289e+06	0.001	0.005288	2.29871	2	1121.66	-0.745086	79.803	0	C1203	48.15	B1503	0.0554
High	STYIKKIGY	5	2	2	P68104;Q5VTE0		0	4.47685e+06	0.001	0.006595	2.29636	2	1072.6	-0.621253	33.4857	0	C1203	74.07	C1203	0.3439
High	YQSPVRVY	4	2	2	Q92503;O43304		0	3.16542e+06	0.001	0.006981	2.28931	2	1011.53	-0.197692	42.5483	0	C1203	43.33	B1503	0.0188
High	THRSGQGAF	3	1	1	P36578		0	494658	0.001	0.005922	2.27627	2	960.464	-0.184491	16.6006	0	C1203	33.33	B1503	0.6119
High	EGYPGQRYY	6	1	1	P34896		0	4.22393e+06	0.001	0.005766	2.27101	2	1132.51	0.0844797	37.968	0	C1203	51.85	C1203	0.3641
High	RQLGSLSKY	2	1	1	Q9Y6W5		0	4.06343e+06	0.001	0.007926	2.25736	2	1051.59	-0.557741	27.5507	0	C1203	40.74	B1503	0.0055
High	GQWGGGSHY	5	1	1	B1AH88		0	7.96921e+06	0.001	0.006125	2.2193	2	948.396	-0.02184	28.1935	0	C1203	40.74	B1503	0.0081
High	YATFIVTNY	6	1	1	Q9HBL8		0	1.08859e+07	0.001	0.005044	2.21833	2	1091.54	0.351791	70.9379	0	C1203	81.48	C1203	0.1195
High	ISTPVIRTF	3	1	1	Q9NZB2		0	2.52791e+07	0.001	0.005359	2.2107	2	1033.6	-0.756786	55.2984	0	C1203	77.78	C1203	0.0735
High	EVFSSFAHA	6	1	1	O60502		0	1.83918e+07	0.001	0.008361	2.19971	2	994.463	0.0270737	49.2292	0	C1203	7.41	A6802	0.035
High	HVVDFFNRI	3	2	2	Q86TA1;Q70IA8		0	3.79077e+06	0.001	0.004241	2.19861	2	1146.61	0.226049	55.9565	0	C1203	33.33	A6802	0.0175
High	RLLDTTITF	6	1	1	Q8N766		0	1.81736e+07	0.001	0.008105	2.17946	2	1079.61	-0.599275	65.8324	0	C1203	40.74	B1503	0.0141
High	RQFEFSIDSF	1	1	1	Q96A09		0	2.27616e+06	0.001	0.005159	2.16023	2	1275.6	0.0236484	70.993	0	C1203	40	B1503	0.0261
High	GKAFSRSSY	4	3	3	Q8N9K5;Q7L945;P17097		0	1.08621e+06	0.001	0.007558	2.13057	2	1002.5	-0.181178	20.5413	0	C1203	40.74	B1503	0.1169
High	RQINWTVLY	4	1	1	P83731		0	4.56224e+07	0.001	0.007625	2.11164	2	1192.65	-0.891687	63.3687	0	C1203	40.74	B1503	0.0094
High	EVVGLIFRL	1	1	1	Q8NBU5		0	9.8193e+06	0.001	0.005714	2.11131	2	1045.64	-0.186405	78.8363	0	C1203	44.44	A6802	0.0228
High	RKRPVPKGATY	4	1	1	P61313		0	4.34489e+06	0.001	0.006417	2.08293	2	1272.75	0.300568	17.1743	0		0	B1503	0.1749
High	FKYDDAERRF	1	1	1	P29692		0	2.26038e+06	0.001	0.008376	2.04907	3	1346.65	-0.244407	35.2128	0	C1203	45.71	B1503	0.4322
High	ETIRNYAQV	1	1	1	Q9Y6E2		0	4.98341e+06	0.001	0.005336	2.0178	2	1093.56	-0.590199	38.6262	0	C1203	66.67	A6802	0.0208
High	EVMKYITSL	7	1	1	P11586		0	8.16874e+06	0.001	0.006573	1.9148	2	1083.58	-0.238459	60.137	0	C1203	40.74	A6802	0.0231
High	AAYGELRAm	6	1	1	Q9UL46	M9(Oxidation)	0	605963	0.001	0.008813	1.89027	2	997.477	-0.404115	32.9898	0	C1203	81.48	C1203	0.009
High	KKKEKDVQF	1	1	1	Q92544		0	697624	0.001	0.007579	1.86892	2	1149.66	-0.252409	16.4029	0	C1203	37.04	B1503	0.1047
High	SAFPEVRSL	9	1	1	Q6YHU6		0	16564730	0.001	0.005152	1.82732	2	1005.54	-0.0574651	52.3973	0	C1203	92.59	C1203	0.0047
High	mVAPVWYLV	3	1	1	Q96HY6	M1(Oxidation)	0	1.7974e+06	0.001	0.006099	1.7401	2	1093.58	0.115777	90.479	0	C1203	48.15	A6802	0.012
High	ETAPRTIFQRV	3	1	1	Q9UBB4		0	8.07287e+07	0.001	0.005648	1.57547	3	1317.73	0.161604	41.9729	0		0	A6802	0.5705
High	GKSFTSNSY	2	2	2	Q8N988;Q96NG5		0	972453	0.002	0.009285	3.41427	2	990.453	0.0242845	26.6191	0	C1203	40.74	B1503	0.1071
High	AKQDVVLNY	7	1	1	Q15029		0	4.25123e+06	0.002	0.01061	3.1325	2	1049.56	-1.11698	41.6575	0	C1203	51.85	B1503	0.0235
High	RKPDEDmKLY	5	1	1	P52948	M7(Oxidation)	0	1.66141e+06	0.002	0.01089	3.05809	3	1310.64	-0.125557	24.7834	0	C1203	34.29	B1503	1.1892
High	KQFEKQVEL	2	1	1	Q14204		0	3.71786e+06	0.002	0.01009	3.04055	2	1148.63	-0.3382	31.6602	0	C1203	51.85	B1503	0.0316
High	QAIDLVYIDF	11	1	1	Q8N0X4		0	2.41833e+07	0.002	0.009662	2.95317	2	1196.62	-2.96901	69.7584	0	C1203	62.86	C1203	5.2821
High	KKPESFFTQF	3	1	1	Q9UBE0		0	4.84038e+06	0.002	0.01091	2.93757	2	1258.65	-1.0074	50.9075	0	C1203	28.57	B1503	1.4103
High	RQLPGSQRY	4	1	1	Q96BD0		0	1.35409e+06	0.002	0.01149	2.91058	2	1104.59	0.190796	22.7543	0	C1203	44.44	B1503	0.0018
High	KSGPTSYL	1	1	1	Q5T686		0	1.63764e+06	0.002	0.01082	2.90757	2	852.446	0.110653	34.3825	0	C1203	70	C1203	6.0005
High	EIFQKPFQTL	8	1	1	Q6DD88		0	9.48141e+06	0.002	0.008999	2.86315	2	1250.68	0.312651	62.1799	0	C1203	40	A6802	0.91
High	LKSPGSVVF	7	1	1	O75787		0	4.78033e+06	0.002	0.009447	2.80681	2	933.54	-0.118365	48.0231	0	C1203	48.15	B1503	0.01
High	TASPLVKSV	9	1	1	Q6P4F7		0	7.24961e+06	0.002	0.009604	2.7503	2	901.535	-0.231257	35.1957	0	C1203	92.59	A6802	0.2616
High	ISPSHIWIF	7	1	1	O94915		0	6.87388e+06	0.002	0.009011	2.73936	2	1099.59	-0.534919	74.1774	0	C1203	66.67	C1203	1.4075
High	LAAYHPWVV	9	1	1	Q5TA50		0	9.73008e+06	0.002	0.01213	2.6826	2	1055.57	-0.349736	58.0321	0	C1203	85.19	C1203	0.6113
High	IKFFTGDVF	9	1	1	Q9UBE0		0	1.10079e+07	0.002	0.009414	2.67724	2	1073.57	-0.420647	71.9064	0	C1203	37.04	B1503	0.0667
High	EIADFFTEL	2	1	1	Q32NB8		0	1.39069e+06	0.002	0.01082	2.66747	2	1084.52	0.0476611	94.0906	0	C1203	48.15	A6802	0.0068
High	GAYGQAVRY	3	1	1	Q9UID3		0	3.38323e+06	0.002	0.01002	2.66481	2	984.49	-0.111406	33.0178	0	C1203	85.19	C1203	0.0963
High	FPMEIRQYL	3	1	1	P42224		0	5.9089e+06	0.002	0.009299	2.63779	2	1196.61	0.0313792	68.712	0	C1203	44.44	C1203	0.3313
High	FAYPNRPDVL	9	1	1	Q03518		0	1.79984e+07	0.002	0.01034	2.62391	2	1191.62	-0.274632	55.0491	0	C1203	80	C1203	0.1481
High	TAYPQVVVV	17	1	1	Q9ULI2		0	7.92536e+07	0.002	0.01197	2.61262	2	975.55	-0.667041	65.3929	0	C1203	96.3	C1203	0.008
High	GKSTSIQSF	5	1	1	P13797		0	3.80184e+06	0.002	0.01195	2.6076	2	954.488	-0.702346	31.2824	0	C1203	37.04	B1503	0.0291
High	GKAFSRISY	2	2	2	Q8WV37;Q3KP31		0	5225449	0.002	0.012	2.59721	2	1028.55	-1.16303	31.5098	0	C1203	44.44	B1503	0.0537
High	DIATILSKV	15	1	1	Q8NG31		0	1.81298e+07	0.002	0.01043	2.57942	2	959.577	-0.153541	73.1908	0	C1203	40.74	A6802	0.0368
High	KSRPELLEY	2	1	1	Q14258		0	1.70618e+06	0.002	0.01239	2.57088	2	1134.62	-0.31153	36.647	0	C1203	81.48	C1203	0.3804
High	EVLDILTRL	6	1	1	O75955		0	2.67787e+07	0.002	0.01154	2.56436	2	1071.64	-0.54581	79.4198	0	C1203	40.74	A6802	0.0191
High	AQKPFGATY	3	1	1	Q96QD5		0	4.88609e+06	0.002	0.01177	2.54919	2	982.498	-1.34239	34.7119	0	C1203	51.85	B1503	0.0009
High	FAWPKILKI	1	2	2	Q9H4G0;O43491		0	7.77458e+06	0.002	0.009823	2.53759	2	1115.7	-0.166717	68.9212	0	C1203	85.19	C1203	0.033
High	RKLFIGGLSF	6	4	4	Q32P51;P09651;P22626;P51991		0	2.82346e+07	0.002	0.01088	2.51893	2	1137.68	-0.578026	61.3428	0	C1203	37.14	B1503	0.0701
High	ESIDIITRA	7	1	1	Q16531		0	12369278	0.002	0.009921	2.43991	2	1017.56	-0.488292	49.8125	0	C1203	37.04	A6802	0.0264
High	RKKDGQVTF	3	1	1	Q9BW60		0	5.01651e+06	0.002	0.009247	2.43709	2	1078.6	-0.142754	18.5525	0	C1203	40.74	B1503	0.0089
High	SQFIFEHSY	1	1	1	Q8TBB0		0	1.93969e+06	0.002	0.01221	2.43693	2	1157.53	0.588986	54.2952	0	C1203	40.74	B1503	0.0055
High	SIAQIIVTV	7	1	1	Q9UNQ0		0	1.68897e+07	0.002	0.01127	2.43493	2	943.582	-0.365121	78.1143	0	C1203	51.85	A6802	0.0211
High	FTVPHTHVF	4	1	1	Q8NFZ0		0	6.79611e+06	0.002	0.01001	2.42728	2	1084.56	-0.271811	47.4006	0	C1203	74.07	C1203	0.0074
High	EVISKLYAV	34	1	1	P50990		0	1.028e+09	0.002	0.009066	2.42505	2	1021.59	-0.577119	53.5519	0	C1203	40.74	A6802	0.0052
High	DVSNVIEKV	23	1	1	O94955		0	2.15453e+08	0.002	0.009783	2.40186	2	1002.55	-0.764353	51.0588	0	C1203	44.44	A6802	0.0314
High	FAYEGPmYL	4	1	1	Q96MT1	M7(Oxidation)	0	7.62988e+06	0.002	0.01208	2.3141	2	1106.49	0.247237	70.9584	0	C1203	88.89	C1203	0.0008
High	RHLEIIRKY	1	1	1	O60645		0	540713	0.002	0.01018	2.31101	3	1227.73	-0.274634	24.867	0	C1203	48.15	B1503	0.0517
High	ETFKNSFVEA	6	1	1	Q6NUM9		0	1.71643e+07	0.002	0.009373	2.28366	2	1171.56	0.00390931	46.2298	0	C1203	25.71	A6802	0.2715
High	ETIPLTAEKL	2	1	1	P24385		0	6.38671e+06	0.002	0.01166	2.28008	2	1114.63	-0.590396	54.6238	0	C1203	51.43	A6802	0.0816
High	KKIPSTVEF	6	1	1	Q9H2G9		0	8.55175e+06	0.002	0.01024	2.27382	2	1048.6	-0.314844	35.2523	0	C1203	44.44	B1503	0.0044
High	GKLISVEY	7	1	1	Q8IVG5		0	3.4334e+06	0.002	0.01096	2.20166	2	908.509	-0.084434	46.8423	0	C1203	36.67	B1503	1.2584
High	VALLRVTPF	1	1	1	Q8N4H5		0	7.31404e+06	0.002	0.01114	2.18594	2	1015.63	-0.0609709	68.0195	0	C1203	74.07	C1203	0.6391
High	IVTEIISEI	5	1	1	Q9BPX3		0	2.64827e+07	0.002	0.0101	2.04652	2	1016.59	-0.241492	78.5158	0	C1203	40.74	A6802	0.1107
High	ETIPGPDAKV	9	1	1	Q8TDP1		0	2.16668e+07	0.002	0.00959	2.03644	2	1026.55	-0.577854	40.7104	0	C1203	48.57	A6802	0.0331
High	YASDVQLIL	6	1	1	Q8NHQ8		0	5.25194e+07	0.002	0.009378	2.01407	2	1021.56	-0.146137	75.8144	0	C1203	88.89	C1203	0.0293
High	RKFPVPKPIDY	5	1	1	Q9BVS4		0	4.07232e+06	0.002	0.01193	2.0075	3	1359.78	-0.296406	41.338	0		0	B1503	0.8333
High	ETFEHPNVV	9	1	1	Q00534		0	6.17106e+07	0.002	0.01078	1.97618	2	1071.51	-0.726149	42.8138	0	C1203	81.48	A6802	0.0088
High	EAAFFEGHFL	4	1	1	Q5W0V3		0	1.24954e+07	0.002	0.01121	1.95634	2	1167.55	0.359369	70.3816	0	C1203	60	A6802	0.7464
High	KHLDKFSSY	5	1	1	Q8N884		0	1.0306e+06	0.002	0.01097	1.93642	2	1124.57	-0.196976	23.457	0	C1203	40.74	B1503	0.0607
High	LTVPFARYL	11	2	2	P12081;P49590		0	1.21457e+07	0.002	0.009477	1.92863	2	1079.62	-0.364991	74.0605	0	C1203	77.78	C1203	0.1659
High	RKAASLKSNY	2	1	1	P36578		0	1.28379e+06	0.002	0.01074	1.75062	2	1137.64	-0.127105	17.2628	0	C1203	28.57	B1503	0.5388
High	SSVPGVRLL	7	1	1	P08670		0	1.41462e+07	0.002	0.01077	1.54115	2	927.562	-0.327798	53.5437	0	C1203	81.48	C1203	0.0791
High	KKIEDNNTL	8	1	1	P62750		0	2.5425e+07	0.003	0.0138	3.07501	2	1074.58	-0.439698	20.5593	0	C1203	44.44	B1503	0.2575
High	RQIGSRSY	3	1	1	P51114		0	8.03257e+06	0.003	0.01242	3.02399	2	966.511	-0.313739	18.1766	0	C1203	30	B1503	0.0166
High	LQLERINVY	1	6	6	Q13885;Q9BVA1;P04350;P68371;Q9BUF5;Q3ZCM7		0	1.76859e+06	0.003	0.01356	2.98489	2	1147.65	-0.851837	57.0909	0	C1203	48.15	B1503	0.0087
High	GQFSKPFSF	5	1	1	P35658		0	3.39576e+06	0.003	0.01549	2.93016	2	1044.51	-0.361253	56.2441	0	C1203	40.74	B1503	0.0042
High	ETIGTGGFAKV	8	1	1	Q14680		0	3.04901e+07	0.003	0.01429	2.84025	2	1079.57	-0.37959	46.3517	0		0	A6802	0.2563
High	SQIRQSTAY	3	1	1	O43150		0	1.38389e+06	0.003	0.01515	2.82009	2	1053.53	-0.0922029	24.5369	0	C1203	37.04	B1503	0.0042
High	FKIKITSEL	5	1	1	Q14141		0	6.86583e+06	0.003	0.01604	2.81295	2	1078.65	-2.29949	50.3564	0	C1203	44.44	B1503	0.5186
High	SKAPAPVTY	3	1	1	Q9H0R1		0	1.15294e+06	0.003	0.01346	2.80273	2	933.504	-0.0282978	31.9253	0	C1203	59.26	B1503	0.0034
High	VKAPSSQTF	3	1	1	Q86TC9		0	1.64639e+06	0.003	0.01313	2.7926	2	964.51	-0.0498453	31.6242	0	C1203	48.15	B1503	0.0054
High	AQEDAQRLY	2	1	1	P20073		0	895764	0.003	0.01632	2.7823	2	1093.53	-0.140913	31.9584	0	C1203	48.15	B1503	0.0418
High	SKDKRDVYY	6	1	1	Q9UET6		0	1.01454e+06	0.003	0.01474	2.77004	2	1173.59	-0.416016	19.0473	0	C1203	40.74	B1503	0.5598
High	IKVIPTVF	9	1	1	P14902		0	2.83139e+07	0.003	0.01621	2.75689	2	916.586	-0.271611	64.0397	0	C1203	33.33	B1503	0.797
High	KQFPTAFEF	2	1	1	Q13496		0	2.38134e+06	0.003	0.01282	2.73688	2	1114.56	-0.338446	62.8835	0	C1203	44.44	B1503	0.0065
High	STFIGEHYV	7	1	1	P08581		0	5.28458e+06	0.003	0.0151	2.73673	2	1052.5	-0.767172	49.4674	0	C1203	70.37	A6802	0.0172
High	YKVDLESKL	2	1	1	Q96NC0		0	3.189e+06	0.003	0.01661	2.70471	2	1094.61	-0.615008	43.7586	0	C1203	44.44	B1503	1.0015
High	GKNLYTNEY	4	3	3	Q9HCP0;P78368;Q9Y6M4		0	1.09708e+06	0.003	0.01562	2.69205	2	1101.52	-0.411993	33.0368	0	C1203	40.74	B1503	0.0801
High	FAYTVKYVL	5	1	1	Q8N2K1		0	2.65527e+06	0.003	0.01356	2.65201	2	1103.61	-1.55607	62.8929	0	C1203	85.19	C1203	0.0353
High	KAISGVHTV	4	2	2	Q2VIR3;P41091		0	2.88153e+06	0.003	0.0159	2.63594	2	911.531	0.0670553	21.7976	0	C1203	85.19	C1203	0.0197
High	IKHSGNITF	2	1	1	P30050		0	3.88187e+06	0.003	0.01281	2.6165	2	1016.55	-0.0960182	28.5948	0	C1203	40.74	B1503	0.007
High	GQRKGAGSVF	10	1	1	P62917		0	2.03544e+07	0.003	0.01557	2.60553	2	1006.54	-0.259465	20.8365	0	C1203	42.86	B1503	0.0549
High	KAIATTVTY	6	1	1	O43808		0	6.63129e+06	0.003	0.01543	2.59479	2	967.545	-0.458423	36.4483	0	C1203	81.48	B1503	0.0276
High	TIPDFIFANV	6	1	1	P61073		0	1.03134e+07	0.003	0.01661	2.58638	2	1136.6	-0.331779	93.5129	0	C1203	28.57	A6802	0.1469
High	GKRIGVFSY	11	1	1	Q01581		0	2.5578e+07	0.003	0.01651	2.57591	2	1026.57	-0.67799	41.0337	0	C1203	40.74	B1503	0.081
High	RKVPDNQQF	4	1	1	Q9BX10		0	1.3559e+06	0.003	0.01297	2.57361	2	1131.59	-0.0703432	23.1288	0	C1203	37.04	B1503	0.0189
High	RQAKEERTF	3	1	1	P35579		0	413992	0.003	0.01502	2.5721	2	1164.61	-0.370455	16.4242	0	C1203	40.74	B1503	0.0065
High	AAAELIKEV	5	1	1	Q13425		0	1.90979e+06	0.003	0.01429	2.56273	2	943.546	-0.24313	45.8538	0	C1203	96.3	C1203	0.2775
High	KEYERAIIF	9	1	1	P27105		0	1.00265e+07	0.003	0.0142	2.5519	2	1168.64	-0.083322	44.3957	0	C1203	40.74	B1503	0.0077
High	GQNKKVMIY	7	2	2	Q14839;Q8TDI0		0	6.64514e+06	0.003	0.01605	2.54423	2	1080.59	-0.553329	25.8662	0	C1203	40.74	B1503	0.0144
High	EVFLKAFAV	7	1	1	O95373		0	1.31167e+07	0.003	0.01446	2.54052	2	1023.59	-0.429508	68.7523	0	C1203	40.74	A6802	0.0388
High	GKFTEGNITY	1	1	1	Q7Z2W4		0	1.43861e+06	0.003	0.01466	2.53819	2	1129.55	-0.247601	42.6243	0	C1203	37.14	B1503	0.0356
High	EVFGLFQKL	13	1	1	P15924		0	2.61413e+07	0.003	0.0154	2.5357	2	1080.61	-0.384287	73.0994	0	C1203	44.44	A6802	0.05
High	STAAVFHAV	6	1	1	P57723		0	2.86093e+06	0.003	0.01505	2.50963	2	902.473	-0.012455	40.4673	0	C1203	70.37	A6802	0.0033
High	DAANVmVYV	5	1	1	Q9Y4C1	M6(Oxidation)	0	2.85556e+06	0.003	0.01376	2.48604	2	997.466	-0.394565	65.2397	0	C1203	81.48	A6802	0.0105
High	RSFHEVREF	2	1	1	Q92963		0	4.86931e+06	0.003	0.01491	2.48039	3	1206.6	-0.233197	27.454	0	C1203	74.07	B1503	0.1129
High	STYEGKPIFL	4	1	1	Q9NU02		0	2.42742e+06	0.003	0.01254	2.47848	2	1154.61	-0.160151	55.3407	0	C1203	60	A6802	0.1994
High	GKHQPHKVTQY	2	2	2	P83881;Q969Q0		0	1.3423e+07	0.003	0.0134	2.465	3	1322.7	0.456506	15.8816	0		0	B1503	1.4107
High	YVTSVILHI	1	1	1	Q5VIR6		0	3.90005e+06	0.003	0.01326	2.45464	2	1044.61	-0.251954	65.485	0	C1203	44.44	A6802	0.1388
High	NIPSFIVRL	3	1	1	P46781		0	1.16766e+07	0.003	0.01355	2.42854	2	1058.64	-0.415436	72.2039	0	C1203	48.15	A6802	0.1038
High	TAFSRLILI	3	1	1	Q6P2Q9		0	1.01057e+07	0.003	0.01647	2.42801	2	1033.64	-1.00558	72.4008	0	C1203	77.78	C1203	0.1119
High	EVFQGVEKL	5	1	1	Q9Y330		0	10237946	0.003	0.01651	2.4277	2	1048.57	-1.3597	50.9455	0	C1203	44.44	A6802	0.0422
High	YPVEIHEYL	2	1	1	Q13901		0	1.93165e+06	0.003	0.01255	2.42706	2	1162.58	0.00615711	59.7647	0	C1203	44.44	A6802	0.4776
High	GKYRDAVSRY	1	1	1	Q8N5M4		0	260190	0.003	0.01485	2.42628	3	1214.63	0.483865	21.3929	0	C1203	31.43	B1503	0.1802
High	VQFGANKSQY	2	1	1	Q7Z7E8		0	1.27105e+06	0.003	0.01553	2.40558	2	1141.56	0.290078	33.9215	0	C1203	40	B1503	0.0217
High	EAFIAWIHV	4	1	1	P21283		0	9.25809e+06	0.003	0.01617	2.40198	2	1085.58	-0.415561	78.4784	0	C1203	81.48	A6802	0.3114
High	GKGSFGEVF	6	2	2	Q9P289;Q9Y6E0		0	7.02462e+06	0.003	0.01307	2.37975	2	927.457	-0.298226	46.6785	0	C1203	37.04	B1503	0.253
High	FAFLRQEL	2	1	1	Q16654		0	4.74431e+06	0.003	0.01402	2.36363	2	1023.56	-0.058533	61.9065	0	C1203	93.33	C1203	0.7521
High	KLYEFVHSF	1	1	1	Q8N4W6		0	3.40357e+06	0.003	0.01263	2.36208	2	1169.6	-0.796205	51.7485	0	C1203	40.74	B1503	0.0203
High	GKLVQIEY	8	1	1	P25787		0	1.64378e+07	0.003	0.01245	2.35269	2	949.536	0.369475	46.96	0	C1203	36.67	B1503	1.737
High	HQFLQNEY	5	1	1	Q16531		0	1.00819e+07	0.003	0.01387	2.35249	2	1078.49	-0.53296	40.2241	0	C1203	43.33	B1503	0.1513
High	DVVNILVYV	6	1	1	Q15652		0	1.95731e+07	0.003	0.0155	2.32757	2	1033.59	-0.0389551	99.8593	0	C1203	40.74	A6802	0.011
High	FVQELNKSL	2	1	1	Q14202		0	3.63487e+06	0.003	0.01452	2.32602	2	1077.59	-0.350635	64.6176	0	C1203	48.15	C1203	0.1836
High	SSFPRFYFV	6	1	1	Q14204		0	3.36817e+07	0.003	0.01658	2.28617	2	1149.57	-0.203498	71.9528	0	C1203	77.78	A6802	0.0816
High	RQYPTPFQL	5	1	1	Q8ND82		0	7.80388e+06	0.003	0.01409	2.25673	2	1149.61	-0.00101094	58.3923	0	C1203	51.85	B1503	0.0118
High	YAFLHRTL	4	2	2	Q9UH17;Q8IUX4		0	4.03708e+06	0.003	0.0137	2.24962	2	1020.56	-0.840903	41.6926	0	C1203	90	C1203	0.2862
High	THLKPGTLY	6	1	1	Q53EP0		0	1.97389e+07	0.003	0.01523	2.23613	2	1029.57	-0.454632	30.9023	0	C1203	37.04	B1503	0.1918
High	HKSPDGRTY	2	1	1	O75400		0	424339	0.003	0.01339	2.23214	2	1060.52	-0.388621	15.8126	0	C1203	55.56	B1503	0.0347
High	GQHSHVVRY	1	1	1	P30291		0	487603	0.003	0.01639	2.20327	2	1082.55	0.0910484	17.3072	0	C1203	48.15	B1503	0.0049
High	KATNVVRLL	6	1	1	Q9NYU1		0	2.89378e+07	0.003	0.01309	2.18472	2	1013.65	-1.31213	38.0746	0	C1203	81.48	C1203	0.229
High	EAFDRSFEV	13	1	1	Q7Z4W1		0	1.31407e+08	0.003	0.01487	2.17833	2	1099.5	-0.75946	53.1976	0	C1203	85.19	A6802	0.0048
High	RKIPVPANRY	6	1	1	Q9NRX1		0	1.96527e+07	0.003	0.01286	2.17219	3	1213.72	-0.114583	26.8113	0	C1203	31.43	B1503	0.0568
High	GKLPRSPSF	3	1	1	Q9P0N9		0	4.09752e+06	0.003	0.01279	2.17166	2	988.557	-0.380181	32.9623	0	C1203	37.04	B1503	0.0307
High	EVIEKFDYV	8	1	1	Q92871		0	6.52168e+06	0.003	0.01326	2.10283	2	1141.58	0.384756	56.1415	0	C1203	40.74	A6802	0.0043
High	YAQVmRTV	4	1	1	Q9NNW7	M5(Oxidation)	0	699857	0.003	0.01303	2.00086	2	983.498	-0.00501447	27.5664	0	C1203	80	C1203	3.4822
High	EVYTPKEIFV	4	1	1	O95297		0	4.60144e+06	0.003	0.015	1.9984	2	1224.65	-0.250574	61.2045	0	C1203	31.43	A6802	0.0955
High	YTTDFIYQL	6	1	1	Q01813		0	5.73509e+07	0.003	0.01639	1.99839	2	1163.56	-0.519444	81.2355	0	C1203	77.78	A6802	0.009
High	ETADVIAKV	30	1	1	O43617		0	322338346	0.003	0.01605	1.95854	2	945.524	-0.90078	41.6403	0	C1203	77.78	A6802	0.0012
High	HTVGFILQL	16	1	1	Q5SRE5		0	1.00486e+08	0.003	0.01612	1.92328	2	1027.59	-0.453607	72.1991	0	C1203	77.78	A6802	0.0263
High	ITFPGIKLI	3	1	1	O75387		0	4.78831e+06	0.003	0.0165	1.89359	2	1001.64	-0.101309	76.7803	0	C1203	77.78	C1203	0.1062
High	HTSPLTQIRL	9	1	1	Q96BP3		0	1.37646e+07	0.003	0.01602	1.8319	2	1165.67	-0.271664	46.6301	0	C1203	51.43	A6802	0.5137
High	SKYAADRNHY	4	1	1	P67809		0	518630	0.003	0.01527	1.70058	2	1224.58	0.280941	17.0766	0	C1203	31.43	B1503	0.2083
High	RKDDPRLSF	9	1	1	P78527		0	2.41851e+07	0.003	0.01454	1.67925	2	1133.61	-0.639509	29.1026	0	C1203	37.04	B1503	0.0196
High	VKLGPAKSY	2	1	1	Q8ND04		0	796335	0.004	0.01719	3.1049	2	962.567	-0.23092	26.8323	0	C1203	48.15	B1503	0.0253
High	GKRLDVTGF	5	1	1	Q9UIY3		0	3.27996e+06	0.004	0.01819	3.04307	2	992.552	-0.610435	36.4019	0	C1203	33.33	B1503	0.1662
High	ASGLIHRV	14	1	1	Q8N6L1		0	4.35804e+07	0.004	0.01682	2.91672	2	852.505	-0.0702091	37.8836	0	C1203	70	A6802	14.5201
High	ALPEFTSIF	3	1	1	Q13887		0	3.94491e+06	0.004	0.01739	2.90701	2	1024.53	-0.0601169	89.8699	0	C1203	37.04	B1503	0.4803
High	KAYHEQLSV	2	6	6	Q71U36;P68363;Q13748;Q6PEY2;P68366;Q9NY65		0	3.15623e+06	0.004	0.01911	2.9019	2	1074.56	-0.296479	27.3223	0	C1203	81.48	C1203	0.1001
High	EVSRALLEL	1	1	1	Q9UPN3		0	1.00694e+07	0.004	0.01908	2.82094	2	1029.59	0.334676	72.7474	0	C1203	48.15	A6802	0.2002
High	FKIEPPGLF	1	2	2	Q969P6;P11387		0	6.23055e+06	0.004	0.01855	2.74681	2	1047.59	-0.536193	71.4423	0	C1203	40.74	B1503	0.0502
High	AKSGVGTAL	4	1	1	P02786		0	1.63249e+06	0.004	0.01973	2.74215	2	803.462	0.245945	25.3335	0	C1203	48.15	B1503	0.1989
High	KLFPGSPAIY	7	7	7	P49792;P0DJD0;P0DJD1;A6NKT7;Q7Z3J3;Q99666;O14715		0	1.2772e+07	0.004	0.01867	2.68632	2	1092.61	-1.26471	58.5464	0	C1203	51.43	B1503	0.1045
High	ESYQKVIELF	5	1	1	Q96KB5		0	1.26197e+07	0.004	0.01969	2.64184	2	1255.66	-0.302281	69.7178	0	C1203	54.29	C1203	4.7188
High	ELINIIDGV	6	1	1	Q8NI22		0	9.02171e+06	0.004	0.01843	2.63813	2	985.556	-0.295627	83.8207	0	C1203	40.74	A6802	0.0378
High	LVANIIQNV	12	1	1	O94915		0	1.35264e+07	0.004	0.01842	2.63116	2	983.588	-0.273423	68.0842	0	C1203	44.44	A6802	0.0264
High	FKFGKELTF	5	1	1	Q5T447		0	4.58798e+06	0.004	0.01915	2.61509	2	1116.61	-0.48122	55.2024	0	C1203	48.15	B1503	0.0171
High	AQRQDIAFAY	1	1	1	P07355		0	3.24657e+06	0.004	0.01792	2.59234	2	1182.59	0.0137492	48.1714	0	C1203	31.43	B1503	0.023
High	DTSSLFDKL	6	1	1	Q16665		0	3.62211e+06	0.004	0.01902	2.57826	2	1025.51	-0.426453	64.4819	0	C1203	74.07	A6802	0.3375
High	SVFGQVERA	4	1	1	Q15233		0	3.9265e+06	0.004	0.01827	2.57352	2	992.516	-0.351331	39.7059	0	C1203	11.11	A6802	0.2015
High	RAFDQKLIF	5	1	1	Q8TDB6		0	5.2658e+06	0.004	0.01806	2.54298	2	1137.64	-1.10308	51.1422	0	C1203	77.78	C1203	0.0141
High	SAAGFPIRV	3	1	1	Q96H55		0	4044915	0.004	0.0191	2.53853	2	917.52	-0.209368	53.4031	0	C1203	88.89	A6802	0.0336
High	AATEIVERV	8	1	1	Q9UID3		0	6.31618e+06	0.004	0.01777	2.51352	2	987.546	-0.625811	39.7836	0	C1203	85.19	A6802	0.27
High	NTCPYVHNI	10	1	1	Q9Y2Y1		0	1.99981e+07	0.004	0.0167	2.50373	2	1060.49	0.252288	42.7096	0	C1203	70.37	A6802	0.2006
High	FTFGSKVTY	3	1	1	Q4LDE5		0	3.82474e+06	0.004	0.01969	2.47456	2	1049.53	-0.631412	51.98	0	C1203	85.19	C1203	0.0093
High	TLADIIIGI	1	1	1	Q9NP58		0	4.99439e+06	0.004	0.01966	2.46969	2	928.571	-0.211841	95.5258	0	C1203	44.44	A6802	0.0203
High	SLLQHLIGL	4	1	1	P78395		0	8.67033e+06	0.004	0.01763	2.41323	2	993.609	-0.432854	77.2407	0	C1203	40.74	C1203	1.6894
High	VmAPRTLVL	43	9	9	P01892;P30447;P05534;P18462;P30450;P30456;P30457;P01891;P10316	M2(Oxidation)	0	2.54783e+08	0.004	0.01681	2.40628	2	1015.6	-0.436349	52.3212	0	C1203	59.26	C1203	0.129
High	KSFEGLFYF	8	1	1	Q00610		0	1.1525e+07	0.004	0.01883	2.40556	2	1137.56	-0.313367	76.5877	0	C1203	66.67	C1203	0.086
High	KQIDRQLTAY	1	1	1	Q14204		0	3.31116e+06	0.004	0.01967	2.36136	3	1235.67	-0.281199	31.5421	0	C1203	34.29	B1503	0.0091
High	EVYGSVAKV	10	1	1	Q07864		0	1.78297e+07	0.004	0.01727	2.35417	2	951.514	-0.295818	37.2351	0	C1203	48.15	A6802	0.0054
High	GKVKSGGTY	2	1	1	P55017		0	2.68904e+06	0.004	0.01724	2.35112	2	896.483	-0.217811	15.8445	0	C1203	40.74	B1503	0.1015
High	AKLKGIGEY	4	1	1	Q92620		0	5.12007e+06	0.004	0.01691	2.33101	2	978.562	-0.0256376	29.4736	0	C1203	48.15	B1503	0.0283
High	NTIPLFVQL	2	2	2	P35222;P14923		0	6.89086e+07	0.004	0.01694	2.29919	2	1044.61	-0.154243	90.0485	0	C1203	77.78	A6802	0.0126
High	TVARPSVPA	10	1	1	P08174		0	1.39182e+08	0.004	0.01674	2.23067	2	897.514	-1.00326	31.6023	0	C1203	7.41	A6802	0.2629
High	NAFPEIFYT	5	1	1	Q99570		0	7.83598e+06	0.004	0.01706	2.2181	2	1101.52	-0.755053	81.555	0	C1203	51.85	A6802	0.2743
High	EVPHFHHEL	7	1	1	Q53EL6		0	5.82408e+06	0.004	0.01911	2.21375	2	1144.55	-0.15818	30.5844	0	C1203	40.74	A6802	0.1115
High	EVFGHAIKA	11	1	1	P54136		0	3.55963e+07	0.004	0.01789	2.20714	2	971.531	-0.449969	32.7457	0	C1203	11.11	A6802	0.0322
High	SAYAQIVQF	5	1	1	Q9Y4W6		0	1.81881e+07	0.004	0.01809	2.15438	2	1026.53	-0.299278	69.5897	0	C1203	77.78	C1203	0.0098
High	FGVDRAILY	4	1	1	P06756		0	8.76626e+06	0.004	0.01774	2.12626	2	1053.57	-0.347395	59.4493	0	C1203	48.15	C1203	0.0963
High	HTAEITHEI	2	1	1	Q00597		0	2.39247e+06	0.004	0.01925	2.08779	2	1050.52	-0.300363	27.3805	0	C1203	70.37	A6802	0.0021
High	EVSRISEVL	11	1	1	Q07065		0	3.0904e+07	0.004	0.01861	2.04394	2	1031.57	-0.269224	48.8965	0	C1203	44.44	A6802	0.1187
High	EVSNIVKEAI	2	1	1	P63172		0	0	0.005	0.02253	2.77122	2	1101.61	-1.91416	51.4458	0	C1203	11.43	A6802	0.435
High	EVAGmLIGL	7	1	1	Q16850	M5(Oxidation)	0	1.48293e+07	0.005	0.0203	2.71567	2	918.497	0.0907243	71.763	0	C1203	48.15	A6802	0.0084
High	LQQPRSLTY	4	1	1	P22102		0	3.93226e+06	0.005	0.02129	2.70015	2	1105.6	-0.696941	40.1437	0	C1203	51.85	B1503	0.0046
High	GKVRTDITY	17	1	1	P62701		0	7.84156e+07	0.005	0.02205	2.69841	2	1052.57	-0.56787	27.9924	0	C1203	44.44	B1503	0.128
High	RKDGSFIVRY	2	1	1	Q6UW63		0	1.94002e+06	0.005	0.02041	2.69544	3	1240.68	-0.253751	32.3665	0	C1203	31.43	B1503	0.4334
High	TTFESSHYLL	7	1	1	Q16531		0	8.28032e+06	0.005	0.02347	2.62249	2	1197.58	0.00799947	55.3828	0	C1203	54.29	A6802	0.0976
High	RKVKNSQSF	3	1	1	P54920		0	984253	0.005	0.02028	2.61561	2	1093.61	-0.0527121	16.0004	0	C1203	29.63	B1503	0.0094
High	ETFPANIQVV	9	1	1	Q5VYK3		0	9.42877e+06	0.005	0.02375	2.56032	2	1117.59	0.0568064	72.29	0	C1203	60	A6802	0.0208
High	KKIRTSPTF	4	1	1	P62750		0	2.74056e+06	0.005	0.02228	2.54243	2	1077.64	-0.475567	21.0002	0	C1203	33.33	B1503	0.0145
High	AKTEVSLTL	2	1	1	P46940		0	2.94626e+06	0.005	0.02022	2.54017	2	961.557	0.0247705	48.2913	0	C1203	51.85	B1503	0.3122
High	EAADIIQKL	5	1	1	O00471		0	1.82692e+07	0.005	0.02176	2.48568	2	1000.57	-0.936921	53.7177	0	C1203	85.19	A6802	0.0324
High	TTAKPQQIQA	2	1	1	P56192		0	1.13766e+06	0.005	0.02007	2.46833	2	1085.59	-0.0875727	25.1271	0	C1203	22.86	A6802	1.2969
High	GAYGEPRVK	3	1	1	Q15392		0	2.53044e+06	0.005	0.02151	2.43975	2	976.521	-0.371506	21.1035	0	C1203	55.56	C1203	5.8378
High	YKAFSANKY	1	1	1	O75882		0	5.25973e+06	0.005	0.02365	2.37831	2	1091.55	-0.327936	23.1081	0	C1203	44.44	B1503	0.0652
High	RHKSHDNVY	2	1	1	Q86SQ0		0	324924	0.005	0.02347	2.34395	2	1155.57	-0.0398801	15.4667	0	C1203	44.44	B1503	0.0798
High	YASNITSVL	2	2	2	Q13085;O00763		0	6.30022e+06	0.005	0.02035	2.3344	2	967.509	-0.192616	64.0125	0	C1203	85.19	C1203	0.0072
High	KQADPFASL	2	1	1	Q5SR56		0	5.19106e+06	0.005	0.02393	2.29704	2	976.508	-1.62206	50.8086	0	C1203	44.44	B1503	0.0148
High	MALGHVIVL	4	1	1	Q9NVR2		0	4.46798e+06	0.005	0.02343	2.21295	2	952.565	-0.0896532	65.2865	0	C1203	88.89	C1203	0.0211
High	RKKAYADFY	8	1	1	P09669		0	1.13421e+07	0.005	0.02409	2.17945	2	1161.61	0.104087	26.3369	0	C1203	37.04	B1503	0.1727
High	VAFPKSLVA	4	1	1	Q8IWI9		0	1.74978e+07	0.005	0.02132	2.16638	2	931.561	0.156292	54.1538	0	C1203	59.26	C1203	0.1419
High	YAYFNFPEL	2	1	1	Q8IY21		0	630410	0.005	0.02286	2.16452	2	1163.54	0.42634	90.6355	0	C1203	85.19	C1203	0.0076
High	DSSEIHFKV	2	1	1	P63165		0	14088764	0.005	0.02075	2.16095	2	1061.53	-0.52654	42.0791	0	C1203	74.07	A6802	0.0528
High	KEYERFSKY	3	2	2	O00148;Q13838		0	7.66471e+06	0.005	0.02256	2.15943	3	1249.62	0.217903	23.6343	0	C1203	44.44	B1503	0.0116
High	GKWKQISKY	2	1	1	Q9H8X2		0	766450	0.005	0.02064	2.12987	2	1137.64	-0.227092	22.6777	0	C1203	40.74	B1503	0.1311
High	KKIRDTQKY	2	1	1	Q9GZR2		0	436820	0.005	0.02013	2.11581	2	1179.68	0.12428	15.6191	0	C1203	37.04	B1503	0.0807
High	HAIKSVKIY	6	1	1	P53618		0	3.48183e+06	0.005	0.02029	2.09701	2	1058.64	-0.281234	26.4075	0	C1203	81.48	B1503	0.2246
High	DTFYIFNHV	1	1	1	Q99805		0	1.45204e+07	0.005	0.0201	2.0605	2	1155.55	-0.350408	72.3303	0	C1203	70.37	A6802	0.0213
High	ETSPVLQKL	5	1	1	Q9NRR4		0	8.84287e+07	0.005	0.02055	1.9808	2	1014.58	-0.397341	44.7461	0	C1203	77.78	A6802	0.0343
High	QAYPEVRIV	6	1	1	Q08211		0	2.51552e+07	0.005	0.02344	1.94923	2	1074.59	-0.658707	51.5468	0	C1203	92.59	C1203	0.1422
High	ESSPFVERL	7	1	1	P14625		0	5.75194e+07	0.005	0.02294	1.87724	2	1063.54	-1.821	50.3233	0	C1203	81.48	A6802	0.1754
High	NVYEYVRKY	2	1	1	O95071		0	2.27136e+06	0.005	0.02384	1.70263	3	1233.63	0.242157	39.8088	0	C1203	51.85	C1203	0.1096
High	KKVFLGRDTY	3	1	1	P08243		0	2.82959e+06	0.005	0.02088	1.57433	3	1226.69	0.00964932	27.6686	0	C1203	28.57	B1503	0.2792
High	SKLPSSIEY	3	1	1	Q15386		0	6.70468e+06	0.006	0.02788	2.89111	2	1023.54	-0.157533	43.7696	0	C1203	51.85	B1503	0.0129
High	AKAGGFVVGY	2	1	1	Q9HAV4		0	1.41239e+06	0.006	0.02611	2.84416	2	968.52	-0.162387	46.1102	0	C1203	40	B1503	0.1049
High	TVVEIILQA	5	1	1	P38935		0	5.49125e+06	0.006	0.02426	2.71267	2	985.592	-0.422563	80.2101	0	C1203	11.11	A6802	0.0406
High	HAIDRVTTSV	2	1	1	Q9BTT6		0	3.74281e+06	0.006	0.0291	2.68563	2	1098.59	-0.874124	29.9899	0	C1203	60	A6802	0.0587
High	NKYGKGIYF	2	1	1	Q7Z2W4		0	1.78098e+06	0.006	0.02592	2.64823	2	1089.57	-0.541631	36.5536	0	C1203	40.74	B1503	0.0307
High	RQIVSGLKY	5	1	1	Q9NYY3		0	5.08246e+06	0.006	0.03208	2.60451	2	1063.63	-0.563695	35.3249	0	C1203	40.74	B1503	0.0041
High	SKFAGGLHF	6	1	1	Q09666		0	7.36157e+06	0.006	0.02438	2.51393	2	963.505	-0.0997032	41.4718	0	C1203	37.04	B1503	0.003
High	TTSHLHQAV	5	1	1	P22695		0	1.68337e+06	0.006	0.02835	2.50328	2	993.511	-0.270161	18.3284	0	C1203	70.37	A6802	0.0974
High	RKLTPGEVY	4	1	1	Q15818		0	2.90801e+06	0.006	0.0295	2.49785	2	1062.59	-0.321507	29.2007	0	C1203	40.74	B1503	0.0182
High	AKVANASYY	5	1	1	O15042		0	2.48894e+06	0.006	0.02662	2.44794	2	986.494	0.0587524	29.1238	0	C1203	40.74	B1503	0.0678
High	GKFNPHVHVEY	5	1	1	Q9ULH1		0	2.87017e+06	0.006	0.02675	2.44755	3	1326.66	0.0602656	33.3365	0		0	B1503	0.8714
High	DSHFFFHLI	4	1	1	Q8NC54		0	4.20469e+06	0.006	0.03173	2.44651	2	1162.57	-0.210463	73.4838	0	C1203	59.26	A6802	0.59
High	TTFPRPVTV	25	1	1	Q15233		0	4.58132e+08	0.006	0.02829	2.44493	2	1017.57	-0.839535	48.7796	0	C1203	88.89	A6802	0.0056
High	GKVFRHNSY	1	3	3	Q9HCG1;Q96SE7;Q9H7R5		0	253322	0.006	0.02962	2.4419	2	1107.57	-0.0431248	17.652	0	C1203	37.04	B1503	0.1536
High	RTALPRIF	3	1	1	Q03518		0	7.13967e+06	0.006	0.0243	2.40924	2	973.594	-0.550303	47.1304	0	C1203	63.33	C1203	3.1715
High	HKAPAFLY	4	1	1	Q8WVX9		0	3.83252e+06	0.006	0.02911	2.38778	2	946.514	-0.0944564	36.5948	0	C1203	30	B1503	0.6349
High	EAMKQILGV	1	1	1	Q14444		0	5.0354e+06	0.006	0.03191	2.37175	2	988.549	-0.342249	52.6721	0	C1203	81.48	A6802	0.0393
High	VmAPRTLLL	36	19	19	P30443;P04439;P13746;P30512;P16188;P16189;P10314;P16190;P30455;P30459;Q07000;P04222;P30504;Q9TNN7;Q29963;P30505;P30508;P30510;Q29960	M2(Oxidation)	0	1.16984e+08	0.006	0.02547	2.37162	2	1029.61	-0.33613	54.6076	0	C1203	55.56	C1203	0.2043
High	EVAPSFGTL	8	1	1	Q5SRE5		0	1.75176e+07	0.006	0.0361	2.36886	2	920.472	-0.356125	65.8494	0	C1203	51.85	A6802	0.0246
High	ISFPAPLYI	5	1	1	P86397		0	1.15267e+07	0.006	0.03649	2.34122	2	1020.58	-0.555571	91.376	0	C1203	77.78	C1203	0.0251
High	IGAARTKTY	2	1	1	Q9Y3B1		0	321038	0.006	0.02596	2.33936	2	980.552	-0.224035	19.0071	0	C1203	48.15	C1203	0.3498
High	GTIGLIHAI	2	1	1	P15374		0	5.94961e+06	0.006	0.03457	2.33655	2	894.541	-0.0830451	56.7897	0	C1203	66.67	A6802	0.0803
High	QKAPDGKSY	1	1	1	Q9HBL8		0	437542	0.006	0.03451	2.3361	2	993.501	0.640815	16.9611	0	C1203	51.85	B1503	0.1579
High	SVFGFSFKL	2	1	1	P26639		0	6.70729e+06	0.006	0.02512	2.32617	2	1031.56	0.578663	78.9282	0	C1203	44.44	A6802	0.0365
High	SKmFHPNVY	5	2	2	P49459;P63146	M3(Oxidation)	0	2.3613e+06	0.006	0.03291	2.30643	2	1138.53	-0.165706	30.1269	0	C1203	44.44	B1503	0.0085
High	TTFESSHYL	5	1	1	Q16531		0	6.41418e+06	0.006	0.0294	2.28898	2	1084.49	-1.26293	44.1549	0	C1203	74.07	A6802	0.0051
High	ETFSSYISV	7	1	1	A5PLN9		0	2.77432e+07	0.006	0.02476	2.2725	2	1032.49	-0.227142	69.9886	0	C1203	77.78	A6802	0.0049
High	EVLQILTQV	2	1	1	Q9Y6V7		0	7.259e+06	0.006	0.03515	2.26622	2	1042.61	-0.376074	81.7337	0	C1203	37.04	A6802	0.0311
High	KKVERQTEL	1	2	2	P11940;Q9H361		0	1.41249e+06	0.006	0.02604	2.2584	2	1130.65	0.0250563	16.5314	0	C1203	44.44	B1503	0.5789
High	RKVYNISEF	4	1	1	O60427		0	1.16109e+07	0.006	0.0244	2.23316	2	1155.62	-0.380167	38.8491	0	C1203	37.04	B1503	0.0143
High	DIFPEPVAFL	1	1	1	Q8TCY9		0	1.59257e+06	0.006	0.03074	2.2185	2	1147.6	-0.327951	105.188	0	C1203	40	A6802	0.2672
High	KKFVTQQQY	3	1	1	Q9Y4E5		0	886563	0.006	0.02475	2.21429	2	1169.63	-0.284069	23.489	0	C1203	40.74	B1503	0.029
High	ETADITHAL	5	1	1	Q15042		0	9.02582e+06	0.006	0.03358	2.19858	2	970.484	-0.173128	44.1115	0	C1203	74.07	A6802	0.0018
High	EIFRAFTEL	1	1	1	Q14166		0	4.52232e+06	0.006	0.03323	2.15148	2	1125.59	-0.344567	69.3253	0	C1203	44.44	A6802	0.1089
High	EISSILKEL	5	1	1	Q9Y4F5		0	1.04925e+07	0.006	0.033	2.09065	2	1031.6	-0.62762	67.7469	0	C1203	51.85	A6802	0.2228
High	ESFIKAIGV	5	1	1	Q9NRN7		0	2.43363e+07	0.006	0.02758	2.02556	2	963.551	-0.442729	59.9611	0	C1203	74.07	A6802	0.0612
High	EVADFLIKA	8	2	2	Q8IWZ3;O75179		0	4.02271e+07	0.006	0.03603	1.92007	2	1005.56	-0.374393	61.5568	0	C1203	11.11	A6802	0.0079
High	YAAPGGLIGV	3	2	2	Q2VIR3;P41091		0	7.52904e+06	0.006	0.03164	1.90217	2	917.509	-0.13246	67.3935	0	C1203	62.86	A6802	0.0946
High	GQIPQILYY	2	1	1	O75592		0	3.76906e+06	0.006	0.03219	1.90029	2	1094.59	-0.0283266	76.5849	0	C1203	51.85	B1503	0.0067
High	ESAGLGYRV	2	1	1	Q63HN8		0	5.58066e+06	0.006	0.02633	1.89067	2	951.489	-0.356278	38.4291	0	C1203	74.07	A6802	0.0202
High	ETQKSIYYI	7	1	1	P08238		0	4.86367e+07	0.006	0.02688	1.78141	2	1144.59	-0.261173	47.4645	0	C1203	62.96	A6802	0.058
High	EIFPVSFHV	4	1	1	Q5THK1		0	2.64849e+07	0.006	0.02441	1.57414	2	1074.56	-0.420948	73.3995	0	C1203	48.15	A6802	0.0055
High	GKIRKDLKY	4	1	1	Q2TAY7		0	2.24719e+06	0.006	0.02474	1.52724	2	1120.68	-0.0981109	19.1345	0	C1203	40.74	B1503	0.2952
High	TNSSVIVRV	2	1	1	Q8NI29		0	2.69366e+06	0.007	0.04211	2.66905	2	974.563	-0.361871	39.6349	0	C1203	51.85	A6802	0.6352
High	KLNGQVLVF	1	1	1	Q15459		0	8.71117e+06	0.007	0.04013	2.37427	2	1017.61	-0.312515	56.8381	0	C1203	44.44	B1503	0.0678
High	SVFPGARLL	4	1	1	Q86X55		0	6.78775e+06	0.007	0.03969	2.16321	2	959.567	-0.214747	61.1145	0	C1203	51.85	C1203	0.0065
High	RAAPFSLEY	5	1	1	Q15181		0	1.27604e+07	0.007	0.03741	2.162	2	1053.54	0.244313	54.3053	0	C1203	92.59	C1203	0.008
High	MAAAWPLLL	4	1	1	P15151		0	7.58576e+06	0.007	0.03916	2.08231	2	985.554	-0.308252	96.9715	0	C1203	85.19	C1203	0.0433
High	EVSKIIKRA	4	1	1	O60502		0	4.38013e+06	0.007	0.04139	1.87854	2	1043.66	-0.0567323	20.2883	0	C1203	11.11	A6802	0.5574
High	EIVRDIKEKL	2	11	11	P62736;Q9BYX7;P60709;P68032;P63261;P63267;P68133;Q6S8J3;A5A3E0;P0CG38;P0CG39		0	3.45075e+06	0.007	0.04043	1.6848	3	1242.74	-0.0317698	37.7389	0	C1203	28.57	A6802	0.8871
High	YKKPDLERY	4	1	1	P35670		0	1.74723e+06	0.008	0.04496	2.62808	3	1211.64	-0.395076	28.0423	0	C1203	48.15	B1503	0.1376
High	ITADVNHNL	4	1	1	Q16222		0	3.903e+06	0.008	0.04834	2.58294	2	996.51	-0.560717	36.6629	0	C1203	74.07	A6802	0.0184
High	EISDIHTKL	3	1	1	Q9UHD2		0	2.34915e+06	0.008	0.04709	2.37073	2	1055.57	-0.369273	35.2162	0	C1203	44.44	A6802	0.0335
High	SVFTFVAEV	1	1	1	Q7Z429		0	5.65029e+06	0.008	0.04657	2.32578	2	998.52	0.207856	84.4361	0	C1203	48.15	A6802	0.0314
High	RQHFSPLSL	1	1	1	O75179		0	2.02577e+06	0.008	0.04398	2.22345	2	1084.59	-0.516604	43.8954	0	C1203	44.44	B1503	0.0387
High	SSYGNIRAV	3	1	1	Q8N122		0	1.52305e+06	0.008	0.04503	2.09057	2	966.5	-0.061625	35.2231	0	C1203	81.48	C1203	0.0147
High	HAAKVILQV	8	1	1	Q63HN8		0	1.34523e+07	0.008	0.04632	2.00993	2	978.61	0.0862491	35.4395	0	C1203	85.19	A6802	0.0357
High	EVSNTFVRL	8	1	1	Q9BUI4		0	1.87789e+07	0.008	0.04349	1.95013	2	1064.57	-0.34153	52.7619	0	C1203	44.44	A6802	0.0389
High	RKVPFGKTY	2	1	1	Q9Y6C9		0	916390	0.008	0.0485	1.80177	2	1095.63	-0.179254	23.5791	0	C1203	51.85	B1503	0.0039
High	SKLFSSVTF	2	1	1	Q9HAV4		0	2.68672e+06	0.009	0.05294	2.80742	2	1015.55	-0.206199	59.3565	0	C1203	37.04	B1503	0.0662
High	AKHTNFVEF	1	1	1	P53680		0	4.13736e+06	0.009	0.04886	2.74211	2	1092.55	-0.355775	37.215	0	C1203	40.74	B1503	0.0305
High	EIFDKIHSL	3	1	1	Q53GS7		0	1.56578e+07	0.009	0.05264	2.6621	2	1101.59	0.654316	51.4755	0	C1203	48.15	A6802	0.0079
High	KKREAEEVY	2	1	1	Q9Y383		0	670705	0.009	0.05446	2.628	2	1151.61	-0.145034	17.2539	0	C1203	44.44	B1503	0.0268
High	IAFSRPVKY	1	1	1	Q99759		0	2.51644e+06	0.009	0.05272	2.61761	2	1080.62	-0.487559	38.1654	0	C1203	88.89	C1203	0.008
High	SVTQIYHAV	6	1	1	P04844		0	3.53196e+06	0.009	0.05267	2.60558	2	1017.54	-0.207254	42.2164	0	C1203	37.04	A6802	0.0354
High	DLSSVISKI	5	1	1	Q6PL18		0	6.57297e+06	0.009	0.05337	2.57033	2	961.556	-0.292606	69.7949	0	C1203	40.74	A6802	0.5587
High	AAYPEIVAV	4	1	1	Q17RS7		0	5.03546e+06	0.009	0.05298	2.5599	2	932.509	-0.22389	67.7224	0	C1203	96.3	C1203	0.0061
High	ETVGILHKV	7	1	1	Q96HH9		0	2.19206e+07	0.009	0.05315	2.53834	2	995.588	-0.51535	35.6034	0	C1203	70.37	A6802	0.0023
High	TTFEHDIQAL	5	1	1	Q01082		0	1.96257e+07	0.009	0.05119	2.50241	2	1174.57	-0.225872	53.4028	0	C1203	57.14	A6802	0.1885
High	DVANKIGII	1	1	1	P62750		0	1.38245e+06	0.009	0.0533	2.50211	2	942.562	-0.101981	55.8668	0	C1203	37.04	A6802	0.8003
High	DTFSVQVLV	7	1	1	Q96L33		0	3.59385e+07	0.009	0.05446	2.42117	2	1007.54	-1.34485	85.0734	0	C1203	77.78	A6802	0.0147
High	KAVGHPFVI	6	1	1	O14980		0	4.21435e+07	0.009	0.05473	2.37606	2	967.572	-0.416767	36.9885	0	C1203	77.78	C1203	0.1068
High	ESIRFFVNV	5	1	1	Q8NBS3		0	1.04102e+07	0.009	0.0542	2.36991	2	1110.59	-0.206701	68.2741	0	C1203	70.37	A6802	0.0572
High	AAAPQLLIV	8	1	1	Q10589		0	3.34609e+07	0.009	0.05035	2.32538	2	895.561	-0.246343	75.1256	0	C1203	92.59	C1203	0.2252
High	ESFDSKFYV	4	1	1	Q5VV42		0	8.00105e+06	0.009	0.05414	2.31636	2	1121.51	-0.272189	56.2958	0	C1203	74.07	A6802	0.0057
High	EAIDFIDSI	2	1	1	P28562		0	6.61317e+06	0.009	0.05368	2.29172	2	1022.5	0.0750015	85.1532	0	C1203	74.07	A6802	0.0194
High	EVFFDGVRV	5	1	1	P49748		0	6.42089e+06	0.009	0.05358	2.19721	2	1067.55	-0.372777	64.2798	0	C1203	44.44	A6802	0.0111
High	GKSSLIVSY	3	1	1	Q96L33		0	4.22866e+06	0.009	0.05086	2.17966	2	953.53	-0.182904	43.5744	0	C1203	51.85	B1503	0.0338
High	EVNKVISSV	5	1	1	Q93008		0	2.00098e+07	0.009	0.05332	2.13745	2	974.552	-0.0492114	38.0728	0	C1203	40.74	A6802	0.0091
High	QASPFVLRA	4	1	1	Q9BUE0		0	4.7867e+06	0.009	0.05156	2.11428	2	988.557	-0.0714722	49.0258	0	C1203	55.56	A6802	0.7658
High	NTTDIFQTV	23	1	1	P37802		0	8.211e+08	0.009	0.05103	2.01999	2	1038.51	-0.186744	65.8256	0	C1203	74.07	A6802	0.0045
High	DVTAIIFVV	3	2	2	Q5JWF2;P63092		0	1.19136e+08	0.009	0.05445	2.00523	2	976.571	-0.263928	103.66	0	C1203	44.44	A6802	0.1107
High	TVISILNTI	1	1	1	O60716		0	695137	0.009	0.05366	1.6773	2	973.593	0.146716	84.6871	0	C1203	37.04	A6802	0.0184
Medium	KQHVTEAF	2	1	1	O43175		0	1.01534e+06	0.01	0.05763	2.51091	2	959.494	-0.177146	22.99	0	C1203	30	B1503	0.1325
Medium	AALTFPVLF	8	1	1	Q05D32		0	1.4606e+07	0.01	0.05576	2.36789	2	978.565	-0.588703	98.8957	0	C1203	77.78	C1203	0.3503
Medium	FTVTFNPKY	1	1	1	P50579		0	728866	0.01	0.05909	2.36229	2	1116.57	-0.560965	57.2228	0	C1203	70.37	C1203	0.4194
Medium	HTFFIKDSL	6	1	1	Q8NFG4		0	4.15852e+06	0.01	0.05731	2.34085	2	1107.58	-0.606817	49.5568	0	C1203	70.37	A6802	0.0606
Medium	TSSKVIQSV	4	1	1	O14976		0	2.54834e+06	0.01	0.05723	2.33458	2	948.536	-0.271049	28.9931	0	C1203	74.07	A6802	0.1549
Medium	QGFPNRVVF	13	1	1	P35579		0	6.18853e+07	0.01	0.05648	2.30637	2	1063.57	-0.559135	54.7992	0	C1203	48.15	C1203	0.1618
Medium	QTYGYEHIL	3	1	1	Q96AX1		0	5.03742e+06	0.01	0.05913	2.28179	2	1123.54	-0.81897	50.7354	0	C1203	74.07	A6802	0.1803
Medium	YTIGKEIIDL	2	3	3	Q71U36;P68363;Q9BQE3		0	2823271	0.01	0.05555	2.251	2	1164.65	-0.473108	65.8364	0	C1203	51.43	A6802	1.1671
Medium	RKNPVQEQTY	3	1	1	Q8N9N2		0	614668	0.01	0.05987	2.17945	2	1262.65	0.225043	22.3651	0	C1203	34.29	B1503	0.0872
Medium	IAVNAVLTV	4	1	1	P48643		0	6.89998e+06	0.01	0.05724	2.13099	2	899.556	-0.0827775	71.2757	0	C1203	85.19	C1203	0.0444
Medium	KKHHSTIVY	1	1	1	Q5VT52		0	660037	0.01	0.05686	2.05197	2	1112.62	0.0180194	17.5033	0	C1203	44.44	B1503	0.0117
Medium	KQAEIVKRL	1	3	3	Q08117;Q04725;Q04727		0	750766	0.01	0.05769	2.05047	2	1084.68	-0.223126	22.1904	0	C1203	51.85	B1503	0.1044
Medium	STIGIHPVC	5	1	1	Q16881		0	1.02153e+07	0.01	0.05949	2.01577	2	926.476	-0.289751	45.4257	0	C1203	37.04	A6802	1.7333
Medium	DLIHEIYTV	2	1	1	P18124		0	5.00364e+06	0.01	0.05752	1.96109	2	1102.58	-0.224005	74.5617	0	C1203	44.44	A6802	0.2239
Medium	NTYGFPIIF	2	1	1	P11498		0	1.49619e+07	0.01	0.05566	1.84862	2	1071.55	-0.493362	94.9002	0	C1203	74.07	C1203	0.073
Medium	ETADVKASV	3	1	1	Q8N1F7		0	4.58063e+06	0.01	0.05924	1.68126	2	919.473	-0.0883553	28.215	0	C1203	74.07	A6802	0.0022
Medium	EVIDLKAEI	1	1	1	Q96G01		0	0	0.011	0.06214	2.54813	2	1029.58	0.0970982	59.9817	0	C1203	37.04	A6802	0.0156
Medium	EVYAGNFVEV	1	1	1	Q9UBS4		0	4.1744e+06	0.011	0.06204	2.51282	2	1126.54	-0.00869475	68.3743	0	C1203	31.43	A6802	0.0196
Medium	EAMELIVKL	4	1	1	Q9BVS4		0	3.18045e+06	0.011	0.06252	2.47536	2	1045.6	-0.371564	69.0323	0	C1203	85.19	A6802	0.0413
Medium	AKLIAVEIY	2	1	1	Q14008		0	2.13955e+06	0.011	0.06115	2.3828	2	1019.61	-0.207349	60.4008	0	C1203	44.44	B1503	0.1481
Medium	EVFAWNNEV	1	1	1	P49419		0	4.68255e+06	0.011	0.06184	2.30848	2	1107.51	-0.491134	70.4032	0	C1203	44.44	A6802	0.0077
Medium	LKVKGNVF	2	1	1	P84098		0	3.04002e+06	0.011	0.06183	2.26994	2	904.561	-0.271335	32.7185	0	C1203	33.33	B1503	1.1998
Medium	ELYYRAIQF	5	1	1	Q00610		0	6.92702e+06	0.011	0.0627	2.2105	2	1202.62	-0.449564	63.7149	0	C1203	37.04	B1503	1.1276
Medium	QQIGKVVQVY	1	2	2	Q9UNX3;P61254		0	572592	0.011	0.06059	2.08371	2	1161.66	-0.232585	22.4263	0	C1203	40	B1503	0.1189
Medium	NAFHHPSAV	1	1	1	P32314		0	598451	0.011	0.0619	2.07849	2	979.474	-0.371263	23.3975	0	C1203	81.48	A6802	0.0977
Medium	EIADLNVRI	3	1	1	Q6KB66		0	9.55218e+06	0.011	0.06276	1.93802	2	1042.59	-0.382302	59.9735	0	C1203	40.74	A6802	0.0095
Medium	IAYIRDLAL	4	1	1	O00116		0	3.92266e+06	0.012	0.06493	2.76456	2	1047.62	-0.42096	64.1545	0	C1203	81.48	C1203	0.0119
Medium	AAAEITRKL	2	1	1	O00567		0	627046	0.012	0.06449	2.49618	2	972.584	-0.0468208	27.0905	0	C1203	88.89	C1203	0.058
Medium	GQKPGGSDF	2	2	2	P56211;O43768		0	2.19446e+07	0.012	0.0652	2.47823	2	892.416	-0.44414	22.2026	0	C1203	37.04	B1503	0.014
Medium	TAVTVNQSL	1	1	1	P05787		0	2.47764e+06	0.012	0.06344	2.42129	2	932.505	0.170628	45.9314	0	C1203	74.07	C1203	0.3481
Medium	AAYQSVRIL	6	1	1	Q9HAT2		0	1.55872e+07	0.012	0.06403	2.37483	2	1020.58	-0.742673	48.9834	0	C1203	88.89	C1203	0.0263
Medium	SVTERGFPSL	2	1	1	Q6ZUK4		0	1.06428e+07	0.012	0.06379	2.33232	2	1092.57	0.0711571	63.94	0	C1203	31.43	A6802	1.6381
Medium	EAVSVIQSI	9	1	1	Q9P035		0	1.12799e+07	0.012	0.0643	2.28554	2	945.525	-0.051032	64.3697	0	C1203	74.07	A6802	0.0782
Medium	KAYSHPRSL	3	1	1	Q9BUY5		0	786730	0.012	0.06391	2.26314	2	1058.57	-1.18813	17.5517	0	C1203	88.89	C1203	0.0043
Medium	EASAVIQGL	2	1	1	Q8IWA0		0	2.46819e+07	0.012	0.06529	2.17322	2	887.483	0.0717772	58.8007	0	C1203	81.48	A6802	0.075
Medium	YTTDFIFNL	2	1	1	P08237		0	1.55948e+07	0.012	0.06551	2.11104	2	1133.55	-0.271987	92.4487	0	C1203	77.78	A6802	0.0178
Medium	LAFPGEmLL	7	1	1	P43007	M7(Oxidation)	0	1.31205e+07	0.012	0.06365	1.97906	2	1006.53	-0.0881648	85.8746	0	C1203	85.19	C1203	0.0274
Medium	VMAPRTLIL	5	19	19	P04222;P30504;Q9TNN7;Q29963;P30505;P30508;P30510;Q29960;P30443;P04439;P13746;P30512;P16188;P16189;P10314;P16190;P30455;P30459;Q07000		0	2.89443e+07	0.012	0.06391	1.87196	2	1013.62	-1.26349	58.5325	0	C1203	55.56	C1203	0.2605
Medium	EIYKEFFEV	2	1	1	O00255		0	7.80184e+06	0.012	0.06499	1.86299	2	1203.59	-0.467213	68.6371	0	C1203	44.44	A6802	0.0283
Medium	EVFPEFAAA	5	1	1	O15294		0	6.0543e+06	0.013	0.06612	2.81492	2	980.472	-0.0332768	72.3325	0	C1203	11.11	A6802	0.0163
Medium	TTADPFVKV	3	1	1	Q8IV01		0	5.70979e+06	0.013	0.06744	2.76589	2	977.53	-0.136435	47.1024	0	C1203	77.78	A6802	0.0025
Medium	KKYGQPIQm	2	1	1	O95757	M9(Oxidation)	0	645031	0.013	0.06581	2.67525	2	1108.58	-0.687314	20.7202	0	C1203	44.44	B1503	0.0275
Medium	KTASINQNV	3	1	1	Q8NI77		0	2.58378e+06	0.013	0.07017	2.6523	2	974.526	-0.160605	24.1745	0	C1203	74.07	A6802	0.1703
Medium	KKFKGDLAY	2	2	2	Q96K31;Q96EF9		0	4.77361e+06	0.013	0.06736	2.62584	2	1069.6	-0.617188	23.3441	0	C1203	44.44	B1503	0.0044
Medium	YTSGPGSRI	9	1	1	P05787		0	6.52433e+06	0.013	0.07107	2.61648	2	937.473	-0.32427	26.5253	0	C1203	70.37	A6802	0.0996
Medium	AKVSGGPSL	2	1	1	Q9Y262		0	1.13688e+06	0.013	0.06854	2.60706	2	815.462	-0.206758	28.3019	0	C1203	44.44	B1503	0.1298
Medium	EVFDEKIEV	4	1	1	Q02952		0	4.00992e+06	0.013	0.06618	2.46991	2	1107.56	-0.183355	56.4933	0	C1203	51.85	A6802	0.0047
Medium	SHYPFFSTF	3	1	1	Q8WXG6		0	6.53717e+06	0.013	0.06692	2.46682	2	1132.51	-0.0247912	67.996	0	C1203	44.44	B1503	0.0742
Medium	SVVDHFNRI	1	1	1	P51665		0	1.74058e+06	0.013	0.0712	2.45102	2	1086.57	-0.648212	39.975	0	C1203	33.33	A6802	0.0366
Medium	RKANILTNRY	1	1	1	Q9NPA3		0	591998	0.013	0.07173	2.42094	3	1248.72	0.533994	23.5474	0	C1203	28.57	B1503	0.3623
Medium	EVSEIHIKV	7	1	1	P30414		0	6.266e+06	0.013	0.06972	2.31067	2	1053.59	-0.242761	41.1976	0	C1203	48.15	A6802	0.0039
Medium	NSSPVLSKV	3	1	1	Q9NXE8		0	1.37595e+06	0.013	0.06872	2.30355	2	930.525	-0.406493	34.2124	0	C1203	77.78	A6802	0.0394
Medium	TTTQITKTV	3	1	1	P11171		0	2.65261e+06	0.013	0.06644	2.29843	2	992.562	0.0223242	28.3687	0	C1203	74.07	A6802	0.0922
Medium	LSLSSEDPVL	5	2	2	Q13507;Q9HCX4		0	8.37177e+07	0.013	0.06673	2.29228	2	1059.56	-0.52785	80.3229	0	C1203	57.14	C1203	18.2392
Medium	EQADIFERV	1	1	1	O60343		0	1.51393e+07	0.013	0.07119	2.15514	2	1106.55	-0.61148	51.5846	0	C1203	44.44	A6802	0.1776
Medium	KAFHSPRSY	2	1	1	Q8IYI8		0	456912	0.013	0.06809	2.13838	2	1092.56	-1.12829	19.2742	0	C1203	85.19	C1203	0.037
Medium	KAVHVIYTV	2	1	1	P61073		0	2.1197e+06	0.013	0.07072	2.12176	2	1029.61	-0.230167	35.3767	0	C1203	81.48	C1203	0.2216
Medium	EIAAVIETV	2	1	1	Q7Z4G1		0	4.85449e+07	0.013	0.0692	2.05182	2	944.53	-0.179539	67.7317	0	C1203	48.15	A6802	0.0047
Medium	EAFKPFLGI	3	1	1	Q14974		0	7.48091e+06	0.013	0.06759	1.96716	2	1021.57	-0.107152	70.3784	0	C1203	74.07	A6802	0.0519
Medium	KVPPFTFHV	10	1	1	Q6NZI2		0	2.63586e+07	0.013	0.06941	1.91806	2	1071.6	-0.400495	52.9883	0	C1203	44.44	A6802	0.1402
Medium	YAFPRVRII	4	1	1	Q9NWZ5		0	2.53185e+07	0.013	0.06967	1.61044	2	1134.68	-0.108502	56.8311	0	C1203	88.89	C1203	0.0061
Medium	KKAHLGTAL	3	1	1	P62266		0	3.29902e+06	0.014	0.0755	2.61237	2	938.578	-0.312006	19.0808	0	C1203	40.74	B1503	0.1968
Medium	DVAELLQEL	1	1	1	Q9BUK6		0	967932	0.014	0.07297	2.34633	2	1029.55	-0.364494	98.2643	0	C1203	48.15	A6802	0.0429
Medium	SASKIIVFV	5	1	1	O15439		0	1.55804e+07	0.014	0.07622	2.26662	2	963.587	-0.699241	58.5032	0	C1203	85.19	A6802	0.0512
Medium	EVVSHTSQV	2	1	1	Q8IX04		0	4.48426e+06	0.014	0.0739	2.17038	2	985.495	-0.196612	24.1609	0	C1203	40.74	A6802	0.0158
Medium	KKPSTGSRY	1	1	1	Q15021		0	620451	0.014	0.07249	1.99127	2	1023.56	0.0721384	15.4122	0	C1203	40.74	B1503	0.2988
Medium	EVAQAGKAV	5	1	1	Q9UPN9		0	2.37319e+06	0.015	0.07779	2.9445	2	872.484	0.452831	21.3197	0	C1203	44.44	A6802	0.1409
Medium	AQHLFIQTF	3	1	1	Q14684		0	2.28775e+06	0.015	0.07767	2.40744	2	1104.58	-0.133632	60.5284	0	C1203	40.74	B1503	0.0085
Medium	TTTHITKTV	2	2	2	O43491;Q9Y2J2		0	1.20677e+06	0.015	0.07852	2.40072	2	1001.56	0.119218	20.2398	0	C1203	74.07	A6802	0.0595
Medium	KKAQAQPVM	1	1	1	P24539		0	581650	0.015	0.07887	2.29396	2	1000.56	-0.21567	18.4781	0	C1203	37.04	B1503	0.1202
Medium	FVGYFPATV	3	1	1	Q9HCE1		0	5.08206e+06	0.015	0.07853	2.24863	2	1000.51	0.0212683	76.1334	0	C1203	48.15	A6802	0.1668
Medium	EVYVGDERV	3	1	1	O14976		0	3.35496e+06	0.015	0.07796	2.15873	2	1065.52	-0.110376	39.5003	0	C1203	40.74	A6802	0.042
Medium	EGSPIKVTL	4	1	1	P06748		0	6.38776e+06	0.015	0.07788	2.1315	2	943.545	-0.94409	51.2359	0	C1203	55.56	A6802	0.9265
Medium	EGVDIILGV	1	1	1	P11171		0	668291	0.015	0.0777	2.02694	2	914.519	-0.184427	83.4099	0	C1203	48.15	A6802	0.0662
Medium	QQFRNAPPF	7	1	1	O60830		0	9.29037e+06	0.015	0.07897	1.99387	2	1104.56	-0.471051	43.6258	0	C1203	33.33	B1503	0.035
Medium	YFVPFIIIm	3	1	1	P35670	M9(Oxidation)	0	2.42911e+06	0.015	0.07781	1.83987	2	1158.63	-0.57833	104.912	0	C1203	48.15	C1203	0.8003
Medium	TTIAIPFGTALV	2	1	1	Q5GLZ8		0	1.26214e+07	0.015	0.07925	1.17144	2	1203.7	0.000462377	92.5614	0		0	A6802	0.6913
Medium	RQYDKFLTHF	2	1	1	Q7Z6M2		0	4.31423e+06	0.016	0.07974	2.26666	3	1354.69	-0.3158	42.339	0	C1203	37.14	B1503	0.0118
Medium	EIYSESHRV	6	1	1	Q96I51		0	4.07698e+06	0.016	0.07951	2.24721	2	1119.54	-0.151037	24.7394	0	C1203	44.44	A6802	0.0266
Medium	QLVDIIEKV	3	1	1	P61289		0	1.49308e+07	0.016	0.0795	1.89346	2	1056.63	-0.98185	65.8512	0	C1203	44.44	A6802	0.1489
Medium	GVYGDVHRV	1	1	1	O95758		0	860987	0.017	0.08152	2.65684	2	1001.52	0.124567	27.0693	0	C1203	48.15	A6802	0.1501
Medium	AmNPTNTVF	3	1	1	P11142	M2(Oxidation)	0	1.48653e+07	0.017	0.08116	2.54664	2	1010.46	-1.97061	50.5374	0	C1203	44.44	B1503	0.0048
Medium	STSAVNHNV	1	1	1	Q07157		0	1.10781e+06	0.017	0.08167	2.51024	2	928.448	-0.220388	18.93	0	C1203	70.37	A6802	0.0123
Medium	SKLGPGEKY	5	2	2	P53805;Q9UKA8		0	2.69677e+06	0.017	0.08167	2.46523	2	978.525	-0.0123053	21.8905	0	C1203	40.74	B1503	0.1059
Medium	AKLPTGTTL	4	1	1	P54098		0	3.06607e+06	0.017	0.08141	2.42931	2	901.535	-0.0958544	40.8501	0	C1203	51.85	B1503	0.0734
Medium	EVFNDVRLL	1	2	2	P52907;P47755		0	0	0.017	0.08125	2.42888	2	1104.6	0.0585704	65.4571	0	C1203	48.15	A6802	0.1342
Medium	EQYESFVKF	5	1	1	Q9H9L7		0	4.42175e+06	0.017	0.08132	2.41119	2	1176.56	0.290182	59.7871	0	C1203	40.74	B1503	0.0121
Medium	ISAPLVKTL	2	1	1	P30305		0	7.78812e+06	0.017	0.08098	2.40218	2	941.603	-0.547656	52.5761	0	C1203	88.89	C1203	0.0362
Medium	TVTSVLEYL	5	1	1	O14893		0	18300180	0.017	0.08083	2.38968	2	1024.56	0.186142	83.8018	0	C1203	40.74	A6802	0.0717
Medium	RLFKDQLVY	5	1	1	Q9Y3I1		0	1.12278e+07	0.017	0.08133	2.37063	2	1181.67	-0.403983	46.2722	0	C1203	48.15	B1503	0.0181
Medium	AHFAKSISL	2	1	1	Q8N0T1		0	2.41211e+06	0.017	0.08059	2.35523	2	973.546	-0.0882827	36.1245	0	C1203	48.15	B1503	0.4675
Medium	RQPDSPTALY	3	1	1	Q9BQG0		0	9.6084e+06	0.017	0.08155	2.29283	2	1147.57	-0.518749	39.9985	0	C1203	34.29	B1503	0.0394
Medium	RKYHQRPTF	2	1	1	O75369		0	1.88952e+06	0.017	0.08094	2.29247	3	1232.66	-0.0197102	18.0413	0	C1203	37.04	B1503	0.0134
Medium	LAAPVISVL	1	1	1	O60337		0	1.16018e+07	0.017	0.08105	2.28687	2	882.566	0.107984	80.3816	0	C1203	92.59	C1203	0.0085
Medium	EVISKTPTL	1	1	1	Q8IUR6		0	2.5002e+06	0.017	0.08128	2.26987	2	987.572	-0.310213	42.8682	0	C1203	44.44	A6802	0.0382
Medium	DTKAILEQI	2	1	1	Q6ZRV2		0	3.57048e+06	0.017	0.0813	2.23708	2	1030.58	0.0962843	59.7965	0	C1203	59.26	A6802	0.2102
Medium	RHYVGSAAAF	3	1	1	Q13227		0	990716	0.017	0.08149	2.18807	2	1078.54	-0.902685	29.8364	0	C1203	37.14	B1503	0.4109
Medium	HTFFIGDHA	2	1	1	O15294		0	4.44138e+06	0.017	0.08106	2.16192	2	1044.49	-0.348322	39.5758	0	C1203	33.33	A6802	0.1073
Medium	EVKEDIAKL	2	1	1	Q12931		0	2.09737e+06	0.017	0.08095	2.03666	2	1044.59	-0.172232	36.205	0	C1203	44.44	A6802	0.1344
Medium	KKSKENVLY	2	1	1	P62191		0	710175	0.017	0.08094	1.91844	2	1108.64	-0.299029	18.9053	0	C1203	44.44	B1503	0.0672
Medium	AAYDKVRKA	2	1	1	Q9NVM6		0	1.45923e+06	0.017	0.08177	1.8769	2	1021.58	0.133936	17.3212	0	C1203	55.56	C1203	0.3316
Medium	DAFPKRIL	2	1	1	O14628		0	6.78775e+06	0.017	0.08154	1.87237	2	959.567	-0.0875334	61.103	0	C1203	83.33	C1203	5.4072
Medium	EVARIQLQI	1	1	1	O75694		0	3.73515e+06	0.017	0.08125	1.8674	2	1069.64	-0.294776	58.2997	0	C1203	37.04	A6802	0.0553
Medium	SASAALSPPL	1	1	1	Q6P3S6		0	7.22284e+06	0.018	0.08213	3.01673	2	913.499	-0.158078	70.3824	0	C1203	57.14	A6802	5.3397
Medium	LAFSRALEL	1	1	1	Q6PD62		0	1.24726e+06	0.018	0.08307	2.34597	2	1019.59	0.025736	63.421	0	C1203	88.89	C1203	0.0097
Medium	DLFQVIYNV	1	1	1	P98082		0	1.33848e+06	0.018	0.08232	2.31699	2	1110.58	0.0307147	99.4599	0	C1203	44.44	A6802	0.2539
Medium	EVPPPFTLV	5	1	1	Q8NI35		0	3.52846e+07	0.018	0.08286	2.3096	2	998.556	-0.0497105	82.9183	0	C1203	44.44	A6802	0.0081
Medium	DVATITKTVV	1	1	1	P57740		0	3.03763e+06	0.018	0.0832	2.30198	2	1046.61	-0.769403	53.0014	0	C1203	31.43	A6802	0.3213
Medium	ETSSImQKL	5	1	1	Q5VT06	M6(Oxidation)	0	1.75473e+06	0.018	0.08231	2.03529	2	1052.53	-0.756577	31.7659	0	C1203	74.07	A6802	0.0607
Medium	IATEIILEI	3	1	1	P42892		0	4.67144e+07	0.018	0.08336	1.9955	2	1014.61	0.0104431	87.2149	0	C1203	81.48	C1203	0.142
Medium	GKFDWRQQY	2	1	1	Q8N766		0	3.27137e+06	0.018	0.08225	1.993	2	1227.59	-0.255574	39.9608	0	C1203	44.44	B1503	0.0236
Medium	HSAEILAEI	2	1	1	Q6FI81		0	3.54925e+08	0.018	0.08215	1.97932	2	982.521	0.312682	53.6033	0	C1203	70.37	A6802	0.018
Medium	SQRAGLQF	1	2	2	Q71UI9;P0C0S5		0	2.73319e+06	0.019	0.08422	2.73301	2	906.479	-0.0636801	36.5353	0	C1203	26.67	B1503	0.0897
Medium	DAARAIAGV	4	1	1	O75821		0	3.00478e+06	0.019	0.08415	2.69055	2	843.468	-0.194498	39.2195	0	C1203	81.48	A6802	0.0326
Medium	GKKGPQSLF	5	1	1	P46087		0	1.25466e+07	0.019	0.08361	2.64247	2	961.546	-0.480641	29.6728	0	C1203	33.33	B1503	0.2266
Medium	SIAEVVHQL	3	1	1	O14976		0	5.51923e+06	0.019	0.08529	2.52621	2	995.551	-0.62488	53.8094	0	C1203	48.15	A6802	0.0145
Medium	MSVHLPFAV	1	1	1	Q9NVA2		0	2.93954e+06	0.019	0.0846	2.3718	2	1000.53	-0.194321	70.9634	0	C1203	70.37	A6802	0.1714
Medium	FTTHILEVI	3	1	1	P15927		0	1.32206e+08	0.019	0.08544	2.26815	2	1072.6	-0.981322	68.3648	0	C1203	66.67	A6802	0.3783
Medium	GQFPGHNEF	5	1	1	Q9UKI2		0	1.37689e+07	0.019	0.08405	2.15506	2	1032.45	-0.585898	39.4739	0	C1203	44.44	B1503	0.0015
Medium	RQLPSSHAL	1	1	1	Q8WV83		0	4.25883e+06	0.019	0.08567	1.94104	2	1008.56	-0.384938	25.282	0	C1203	44.44	B1503	0.015
Medium	EVSKAIINI	4	1	1	Q9NXP7		0	2.69908e+07	0.019	0.0836	1.92022	2	986.588	-0.1237	51.7457	0	C1203	40.74	A6802	0.0225
Medium	ETIFGEWTV	1	1	1	Q96MT1		0	34093706	0.019	0.0839	1.87081	2	1081.52	-1.16029	86.6793	0	C1203	70.37	A6802	0.0087
Medium	ESSYIFVSV	2	1	1	P42336		0	1.25623e+07	0.019	0.08402	1.68585	2	1030.51	-0.215979	75.7299	0	C1203	74.07	A6802	0.0172
Medium	KQFDRKHHTY	1	1	1	Q9HAY2		0	462412	0.02	0.09143	2.56682	3	1359.69	-0.214705	15.8943	0	C1203	42.86	B1503	0.0062
Medium	KKEGGTVVY	2	1	1	P49419		0	727677	0.02	0.09193	2.49596	2	980.542	0.397948	19.8758	0	C1203	48.15	B1503	0.0277
Medium	YHGKTGRVY	1	1	1	P46778		0	952484	0.02	0.08612	2.29023	2	1080.56	-0.566719	16.8208	0	C1203	48.15	B1503	0.1551
Medium	EVSRVLEQV	4	1	1	Q96R06		0	5.67566e+06	0.02	0.08619	2.27897	2	1058.58	-0.180804	44.5595	0	C1203	40.74	A6802	0.0149
Medium	KKFSGKHVVF	4	1	1	P62081		0	751643	0.02	0.08679	2.18506	2	1176.69	0.0417036	21.7718	0	C1203	48.57	B1503	0.0682
Medium	HTFHGNFFV	2	2	2	O95486;O95487		0	4.0367e+06	0.02	0.09151	2.12925	2	1105.52	-0.451984	45.1699	0	C1203	70.37	A6802	0.0048
Medium	ETTSISKITV	2	1	1	P51587		0	5.88343e+06	0.02	0.09071	2.06533	2	1078.6	-0.249229	44.6763	0	C1203	40	A6802	0.1046
Medium	HHVIARHEY	3	1	1	Q8WUH1		0	677183	0.02	0.08981	1.87074	2	1161.59	0.116127	17.2062	0	C1203	40.74	B1503	0.2537
Medium	KQFEGSTSF	1	1	1	Q8NFX7		0	839090	0.021	0.09674	2.49409	2	1030.48	-0.459196	34.7901	0	C1203	37.04	B1503	0.0004
Medium	EIADLVTSV	1	1	1	Q5MIZ7		0	2.89574e+06	0.021	0.09619	2.4061	2	946.509	-0.256277	70.8056	0	C1203	48.15	A6802	0.0038
Medium	YLLPDTKAY	2	1	1	P14625		0	5.82473e+06	0.021	0.09357	2.19117	2	1083.57	-1.16552	52.5903	0	C1203	51.85	B1503	0.0331
Medium	RKSLNSIEF	1	1	1	P78527		0	1.66169e+07	0.021	0.09603	2.15145	2	1093.6	-0.388009	36.791	0	C1203	40.74	B1503	0.0352
Medium	VAPSKAREY	1	1	1	Q5XKP0		0	230317	0.021	0.09609	1.98393	2	1020.55	-0.261263	18.0661	0	C1203	88.89	C1203	0.734
Medium	GQEGKYRVY	2	1	1	Q12830		0	945165	0.021	0.09676	1.82638	2	1099.55	0.0335452	24.1196	0	C1203	48.15	B1503	0.0646
Medium	KKKSPASTF	2	1	1	Q86U70		0	484082	0.022	0.09676	2.87225	2	993.573	0.0616363	16.6769	0	C1203	37.04	B1503	0.0122
Medium	AQFKGTQSL	2	1	1	Q9UK61		0	6.31809e+06	0.022	0.09676	2.25141	2	979.521	-0.0232596	32.363	0	C1203	44.44	B1503	0.0068
Medium	FAADIISVL	4	1	1	Q13200		0	4.11403e+07	0.022	0.09676	2.22652	2	948.54	-0.154668	88.7914	0	C1203	92.59	C1203	0.0035
Medium	EAVQMLKDI	1	1	1	Q14738		0	2.79379e+06	0.022	0.09676	2.16709	2	1046.55	-0.835583	46.1157	0	C1203	70.37	A6802	3.5398
Medium	NSSQVVVAV	7	1	1	Q16531		0	6.07374e+07	0.022	0.09676	2.14041	2	902.494	-0.498976	49.0255	0	C1203	77.78	A6802	0.0339
Medium	GAYEQVIKY	4	1	1	P98194		0	1.0935e+07	0.022	0.09676	2.13986	2	1070.55	-0.140142	46.1323	0	C1203	88.89	C1203	0.0474
Medium	HTIYPKDSV	3	1	1	Q9NZP8		0	730102	0.022	0.09676	2.12923	2	1059.55	-0.382156	27.1601	0	C1203	66.67	A6802	0.0304
Medium	KAFGSTIVI	1	1	1	Q13620		0	5.03978e+06	0.022	0.09676	2.12363	2	935.555	-0.862466	52.8218	0	C1203	81.48	C1203	0.0218
Medium	ETFQNSVFV	1	1	1	O00767		0	1.24436e+07	0.022	0.09676	2.11655	2	1070.51	-0.71679	66.172	0	C1203	74.07	A6802	0.0072
Medium	TAFPKPLLT	3	1	1	Q9BZG8		0	1.32164e+07	0.022	0.09676	2.0652	2	987.587	-0.18783	54.1808	0	C1203	55.56	C1203	0.9088
Medium	TTSNTVSKL	1	1	1	Q6NZI2		0	1.2352e+06	0.022	0.09676	1.96927	2	950.515	-0.154635	24.5807	0	C1203	74.07	A6802	0.2818
Medium	DVIYPmAVV	2	1	1	P78406	M6(Oxidation)	0	4.38167e+06	0.022	0.09676	1.47074	2	1022.52	-0.292217	75.1884	0	C1203	40.74	A6802	0.0294
Medium	ETIESINQL	1	2	2	Q92925;Q6STE5		0	2.64536e+06	0.023	0.09676	2.39998	2	1046.54	-0.277954	60.0593	0	C1203	74.07	A6802	0.0076
Medium	EVYPFGIVGm	1	1	1	O75534	M10(Oxidation)	0	2.22705e+06	0.023	0.09676	2.38807	2	1127.54	0.343191	83.0153	0	C1203	28.57	A6802	0.0891
Medium	EASYLITSV	1	1	1	O60488		0	1.53399e+07	0.023	0.09676	2.35497	2	982.509	0.0219562	65.9341	0	C1203	81.48	A6802	0.0329
Medium	EAIGNPHHV	3	1	1	Q14146		0	2.95013e+06	0.023	0.09676	2.33992	2	973.485	-0.133972	20.5207	0	C1203	81.48	A6802	0.0442
Medium	GKTKEGVLY	1	1	1	P37840		0	800567	0.023	0.09676	2.27461	2	994.557	-0.185119	22.9492	0	C1203	40.74	B1503	0.3325
Medium	RQVGATVEF	4	1	1	Q13432		0	6.46929e+06	0.023	0.09676	2.14791	2	1006.53	-0.371276	40.9636	0	C1203	40.74	B1503	0.0032
Medium	EVYPGQQYL	3	1	1	Q8NF64		0	6.24449e+06	0.023	0.09676	2.12787	2	1096.53	-0.147723	62.4767	0	C1203	48.15	A6802	0.0118
Medium	HSSGINVNA	1	1	1	Q14444		0	1.60124e+07	0.023	0.09676	2.08244	2	898.437	-0.430533	25.0931	0	C1203	40.74	A6802	0.3376
Medium	RQLNLITRF	1	1	1	Q86WI3		0	2.73484e+06	0.023	0.09676	1.8335	2	1160.69	-0.45029	47.2807	0	C1203	33.33	B1503	0.0054
Medium	RKIGRDQELY	4	1	1	P26639		0	2.11089e+07	0.023	0.09676	1.7404	2	1277.7	0.176381	23.3201	0	C1203	31.43	B1503	0.3619
Medium	HKVISGTTL	2	1	1	Q9NUL3		0	3.78435e+06	0.024	0.09676	2.55418	2	955.557	-0.154779	26.6466	0	C1203	40.74	B1503	0.2142
Medium	VAADIAVQL	1	1	1	P08240		0	2.20839e+06	0.024	0.09676	2.41112	2	899.52	-0.0115405	66.3934	0	C1203	88.89	C1203	0.0199
Medium	PQCPSGRVY	3	1	1	Q16186		0	1.89939e+06	0.024	0.09676	2.39388	2	1006.48	0.135519	31.3209	0	C1203	51.85	B1503	0.9576
Medium	NSASIFNTL	3	1	1	Q96HU1		0	3.52444e+06	0.024	0.09676	2.33486	2	966.489	0.0641921	69.1624	0	C1203	77.78	A6802	0.0549
Medium	TTVELANKV	1	1	1	O75533		0	3.30408e+06	0.024	0.09676	2.29908	2	974.552	0.0760465	37.7883	0	C1203	70.37	A6802	0.0153
Medium	FAFEHSEEY	1	1	1	Q9BQ70		0	2.24143e+06	0.024	0.09676	2.07251	2	1158.47	-0.0507724	46.8894	0	C1203	88.89	C1203	0.0071
Medium	RAYGGPRYL	2	1	1	Q3MIP1		0	3.43872e+06	0.024	0.09676	2.05563	2	1052.56	-0.788134	30.1016	0	C1203	88.89	C1203	0.004
Medium	KKKQIEQKF	3	1	1	Q9NQS7		0	1.53811e+06	0.024	0.09676	2.01556	2	1176.71	-0.175833	16.4099	0	C1203	29.63	B1503	0.1509
Medium	KKLQQTQEY	1	2	2	P42229;P51692		0	351417	0.024	0.09676	1.95824	2	1165.62	0.0618718	18.6132	0	C1203	40.74	B1503	0.0331
Medium	SQRPAARAF	3	2	2	Q9BTY7;P0CB43		0	1.80358e+06	0.024	0.09676	1.92916	2	1003.54	-0.224157	21.3265	0	C1203	40.74	B1503	0.0027
Medium	TTFDHQNSENV	1	1	1	Q9Y2D8		0	593521	0.024	0.09676	1.77825	2	1291.56	0.28969	29.5611	0		0	A6802	0.3537
Medium	ESAPIGIRV	2	1	1	O75054		0	3.5311e+06	0.024	0.09676	1.51733	2	941.541	-0.216598	48.5151	0	C1203	81.48	A6802	0.0083
Medium	GKLKPTMAF	1	1	1	Q6YN16		0	3.20241e+06	0.025	0.09676	2.65467	2	992.56	-0.194838	36.3685	0	C1203	29.63	B1503	0.0167
Medium	TVFEGRIYV	1	1	1	O94889		0	2.80732e+06	0.025	0.09676	2.62235	2	1083.58	-0.394948	55.6629	0	C1203	48.15	A6802	0.0033
Medium	RKEETVTVY	2	1	1	Q9BZX2		0	7.70476e+06	0.025	0.09676	2.44914	2	1124.59	-0.216389	25.9174	0	C1203	48.15	B1503	0.0125
Medium	FSVITVIGAL	1	1	1	Q53R12		0	3.22713e+07	0.025	0.09676	2.44413	2	1019.61	-0.336879	66.1253	0	C1203	57.14	A6802	3.8071
Medium	SAVPFLILV	1	1	1	Q8NA29		0	3.31082e+06	0.025	0.09676	2.36811	2	958.597	-0.016412	100.844	0	C1203	85.19	A6802	0.0598
Medium	TSVPELQIPL	2	1	1	Q96R09		0	1.22136e+06	0.025	0.09676	2.32643	2	1096.62	0.0220936	83.5013	0	C1203	54.29	A6802	2.3343
Medium	ETYNGHLVSC	1	1	1	Q9Y4Z0		0	1.14514e+07	0.025	0.09689	2.22499	2	1122.49	-0.661747	38.9554	0	C1203	28.57	A6802	0.8457
Medium	SKFGTGNKY	1	1	1	P14735		0	880429	0.025	0.09738	2.21428	2	1001.51	0.0731418	19.7533	0	C1203	44.44	B1503	0.014
Medium	QTHSVFVNV	2	1	1	Q9Y3A5		0	1.05778e+07	0.025	0.09781	2.15933	2	1030.53	-0.106315	44.5328	0	C1203	74.07	A6802	0.0267
Medium	ETSDILQRV	5	1	1	Q14164		0	8.20832e+06	0.025	0.09773	2.13642	2	1060.56	-0.306837	47.4081	0	C1203	74.07	A6802	0.0048
Medium	RSATLAAAAL	5	1	1	Q8NG41		0	1.43894e+07	0.025	0.09676	2.09989	2	944.552	-0.253748	26.6398	0	C1203	51.43	C1203	4.6873
Medium	AAFLGERVF	1	1	1	Q8WV44		0	1.14458e+06	0.025	0.09693	2.0537	2	1009.55	-0.104945	61.0782	0	C1203	81.48	B1503	0.1078
Medium	AAIDHQIEV	1	1	1	Q9Y485		0	6.37161e+06	0.025	0.09677	2.02962	2	995.515	-0.989703	41.8875	0	C1203	88.89	C1203	0.0259
Medium	DVEEIFRKV	1	1	1	P29466		0	1.66497e+06	0.025	0.09689	1.99239	2	1134.62	0.101192	54.2141	0	C1203	44.44	A6802	0.4729
Medium	FKSPAASSF	1	1	1	O15504		0	1.83532e+06	0.026	0.09965	2.66715	2	941.473	-0.244889	40.0648	0	C1203	44.44	B1503	0.0106
Medium	GKRPGGSTF	3	1	1	O15399		0	2.83164e+06	0.026	0.09849	2.59213	2	906.479	-0.411372	18.1787	0	C1203	40.74	B1503	0.0145
Medium	RTFYIAEQV	1	1	1	Q9H0X9		0	1.61842e+06	0.026	0.1023	2.46747	2	1126.59	-1.853	50.6079	0	C1203	70.37	A6802	0.2324
Medium	FTWEGLYNV	1	1	1	P51784		0	9.37072e+06	0.026	0.1022	2.44704	2	1128.54	-0.444151	82.9745	0	C1203	74.07	A6802	0.009
Medium	ELINIIDGVL	1	1	1	Q8NI22		0	2.08453e+06	0.026	0.1006	2.392	2	1098.64	0.434637	98.7122	0	C1203	34.29	A6802	1.3526
Medium	mSSSVVVRL	1	1	1	A0JNW5	M1(Oxidation)	0	3.76563e+06	0.026	0.09959	2.37971	2	993.539	-0.444935	44.7727	0	C1203	81.48	A6802	0.1302
Medium	DIYSKFDVI	1	2	2	P54619;Q9UGJ0		0	6.09562e+06	0.026	0.1007	2.18528	2	1099.57	0.686926	69.7655	0	C1203	40.74	A6802	0.7913
Medium	ETIMNQEKL	1	1	1	P20290		0	1.18926e+06	0.026	0.1028	2.17581	2	1105.56	-0.448507	40.4383	0	C1203	66.67	A6802	0.3546
Medium	VAYPLYILY	1	1	1	Q99567		0	4.49201e+06	0.026	0.1044	2.11729	2	1114.62	-0.3174	90.1149	0	C1203	92.59	C1203	0.0295
Medium	RAYDGTTYL	2	1	1	Q53GS9		0	5.44564e+06	0.026	0.1033	2.06243	2	1059.51	-0.0242134	41.0217	0	C1203	81.48	C1203	0.0009
Medium	YSAPVIHVL	1	1	1	Q99707		0	2.80402e+06	0.026	0.09975	2.01052	2	998.567	-0.151457	58.3135	0	C1203	88.89	C1203	0.003
Medium	KSVDWLLVF	1	1	1	Q96J42		0	1.62435e+07	0.026	0.09834	1.86758	2	1106.62	0.1537	84.1374	0	C1203	70.37	C1203	0.219
Medium	HTAIGAHPV	2	1	1	Q92567		0	808898	0.026	0.1014	1.82393	2	902.484	-0.0119355	21.6617	0	C1203	70.37	A6802	0.032
Medium	KKDMSPQKF	1	1	1	Q96SW2		0	409875	0.026	0.1028	1.80144	2	1108.58	-0.810959	20.3726	0	C1203	33.33	B1503	0.181
Medium	ETHFTGNEV	2	1	1	Q9BX74		0	3.3158e+07	0.026	0.1011	1.70377	2	1033.46	-0.479834	30.6537	0	C1203	70.37	A6802	0.0515
Medium	TVADKIHSV	1	1	1	O95147		0	2.06789e+06	0.027	0.1078	2.45837	2	969.536	-0.238144	27.8578	0	C1203	48.15	A6802	0.0033
Medium	SKYPASSSVF	1	1	1	P09629		0	2.83899e+06	0.027	0.1057	2.32554	2	1072.53	-0.501798	40.5068	0	C1203	40	B1503	0.0308
Medium	RSFPGFQAF	4	1	1	Q01780		0	5.32858e+06	0.027	0.1099	2.28471	2	1056.53	-0.250628	60.5514	0	C1203	70.37	B1503	0.0055
Medium	GKSDPFLVF	1	3	3	Q9HCH3;Q86YQ8;Q8IYJ1		0	4.41458e+06	0.027	0.1157	2.13721	2	1009.54	0.0254119	68.2542	0	C1203	44.44	B1503	0.0196
Medium	FKIADPFVL	1	2	2	P17010;P08048		0	3.44732e+06	0.027	0.116	1.98195	2	1049.6	-0.326379	76.6432	0	C1203	48.15	B1503	0.5589
Medium	SAADIPINI	2	1	1	P21333		0	7.22284e+06	0.028	0.1207	2.44332	2	913.499	-0.0244489	70.2632	0	C1203	81.48	A6802	0.0244
Medium	IAVGHIYFF	1	1	1	Q9GZP9		0	5.08263e+06	0.028	0.1213	2.20448	2	1066.57	-1.02276	73.5807	0	C1203	74.07	C1203	0.1782
Medium	FRLLGNVL	2	2	2	P68871;P02042		0	3.96188e+06	0.028	0.1282	2.16075	2	931.572	-0.301836	67.1556	0	C1203	50	B1503	4.3558
Medium	FSAGEPRVL	2	1	1	Q9BRA0		0	2.46724e+06	0.028	0.1193	2.04545	2	975.525	-0.433691	45.0337	0	C1203	88.89	C1203	0.1714
Medium	KSIARVLTV	1	1	1	P42766		0	4.63669e+06	0.028	0.1222	2.00993	2	986.636	-0.198305	36.3591	0	C1203	77.78	C1203	0.1113
Medium	EVGPKFRGV	1	1	1	Q9Y312		0	5.08435e+06	0.028	0.1268	1.99578	2	988.557	-0.14333	32.4029	0	C1203	48.15	A6802	0.346
Medium	AAAALVLKA	2	1	1	Q9Y490		0	3.53203e+06	0.028	0.1257	1.91792	2	827.535	-0.161519	42.7874	0	C1203	51.85	A6802	2.3474
Medium	DVASIKEKV	2	1	1	Q13601		0	2.48325e+06	0.028	0.1225	1.91516	2	988.567	-0.14566	31.6444	0	C1203	44.44	A6802	0.0371
Medium	RTFPWIIEV	3	1	1	P28749		0	8432031	0.028	0.1199	1.90027	2	1160.65	-0.0202188	78.8432	0	C1203	88.89	C1203	0.0297
Medium	RKIKQGLGL	1	1	1	P00966		0	727668	0.028	0.1252	1.83122	2	1012.66	-0.167035	23.2987	0	C1203	40.74	B1503	0.2034
Medium	DLmAPQPGV	1	1	1	Q96B49	M3(Oxidation)	0	3.82289e+06	0.029	0.1293	2.27285	2	943.456	0.15546	54.9153	0	C1203	37.04	A6802	0.2434
Medium	RKHGVVPLATY	1	1	1	P46778		0	1.72933e+06	0.029	0.1294	1.95465	3	1240.72	0.0143651	32.0128	0		0	B1503	0.4465
Medium	GQKQYNVDY	1	1	1	Q9BT78		0	313656	0.03	0.133	2.40875	2	1114.52	-0.416827	31.381	0	C1203	40.74	B1503	0.0349
Medium	RKDLFIATY	2	1	1	P32121		0	3.60454e+06	0.03	0.1338	2.23928	2	1126.63	-0.455965	46.2817	0	C1203	44.44	B1503	0.0396
Medium	RSYPYAFSV	4	1	1	Q5H9F3		0	1.61703e+07	0.03	0.1361	2.18262	2	1089.54	-0.641714	53.8738	0	C1203	77.78	C1203	0.032
Medium	ETHLHWHTV	1	1	1	P05067		0	1.40186e+06	0.03	0.1401	2.03436	2	1159.56	-0.283604	28.5907	0	C1203	70.37	A6802	0.1101
Medium	KKSSGEIVY	1	1	1	Q02543		0	1.30187e+07	0.03	0.1344	1.8896	2	1010.55	-0.39995	22.2073	0	C1203	51.85	B1503	0.0237
Medium	DVFHmVVEV	4	1	1	Q15181	M5(Oxidation)	0	0	0.03	0.135	1.78651	2	1090.52	0.0321036	70.3257	0	C1203	51.85	A6802	0.043
Medium	SAFPAVQYL	1	1	1	Q13227		0	271594	0.03	0.1386	1.73973	2	995.52	-0.112957	75.9406	0	C1203	88.89	C1203	0.0028
Medium	ETFFGVQWV	3	1	1	P32970		0	4.0292e+06	0.03	0.1401	1.73644	2	1112.54	0.0125785	93.1252	0	C1203	74.07	A6802	0.0235
Medium	HKYLHTTIF	1	1	1	Q9BX10		0	1.75204e+06	0.031	0.1401	2.45699	2	1159.63	-0.183982	36.5466	0	C1203	33.33	B1503	0.0124
Medium	YKASSGLLY	1	1	1	Q08945		0	2.79535e+06	0.031	0.1401	2.37164	2	1001.53	-0.407921	43.1674	0	C1203	51.85	B1503	0.0233
Medium	DASEIQVQV	3	1	1	P18858		0	3.29871e+06	0.031	0.1401	2.24208	2	988.494	-0.428001	59.5859	0	C1203	85.19	A6802	0.0625
Medium	AKGPGLFF	1	2	2	Q9NP85;P27105		0	7.74647e+06	0.031	0.1401	2.20851	2	836.466	-0.0873163	56.817	0	C1203	33.33	B1503	1.9107
Medium	AKLPSETIF	1	1	1	P57678		0	7.29072e+06	0.031	0.1401	2.1132	2	1005.56	-0.789331	54.1362	0	C1203	40.74	B1503	0.0346
Medium	ESLNIIINV	1	1	1	Q96NE9		0	1.07056e+07	0.031	0.1401	2.06352	2	1014.58	0.0839226	81.328	0	C1203	74.07	A6802	0.0281
Medium	RKTGQAPGY	1	1	1	P99999		0	232144	0.031	0.1401	2.02204	2	977.516	-0.122131	17.0697	0	C1203	40.74	B1503	0.2992
Medium	ISSNISENL	1	1	1	Q13029		0	1.42728e+06	0.031	0.1401	1.90514	2	976.494	-0.110498	27.1464	0	C1203	70.37	C1203	1.2518
Medium	DTTKWEWLV	1	1	1	Q9BWJ5		0	162153	0.031	0.1401	1.60746	2	1177.59	-0.568056	77.015	0	C1203	66.67	A6802	0.8805
Medium	HKGRGQLVY	2	1	1	Q9BX59		0	5.26694e+06	0.032	0.1401	2.21056	2	1057.59	-0.7264	19.3783	0	C1203	44.44	B1503	0.1691
Medium	ETFYIGKLI	1	1	1	Q7KZ85		0	7.31717e+06	0.032	0.1401	2.11888	2	1083.61	0.0524235	70.5176	0	C1203	66.67	A6802	0.0935
Medium	EIAPFVEILL	1	1	1	P55060		0	2.27123e+06	0.032	0.1401	2.08098	2	1143.67	-0.523254	105.525	0	C1203	31.43	A6802	0.2118
Medium	EVLDKRYNV	3	1	1	Q13523		0	9.75637e+06	0.032	0.1401	2.05573	2	1135.61	-0.213223	33.831	0	C1203	40.74	A6802	0.03
Medium	TVTTVILEV	4	1	1	Q9UKF6		0	9.09173e+07	0.032	0.1401	2.03564	2	974.577	-0.178072	74.3621	0	C1203	48.15	A6802	0.0526
Medium	YAVDRAITH	1	1	1	P14866		0	633029	0.032	0.1401	2.02258	2	1045.54	-2.47404	29.2365	0	C1203	51.85	C1203	0.5525
Medium	EASSVKNEL	1	1	1	Q9P2D1		0	2.20327e+06	0.032	0.1401	1.77617	2	976.495	0.0667746	26.9814	0	C1203	85.19	A6802	0.4395
Medium	YKYSGRDSL	1	1	1	P12956		0	991513	0.032	0.1401	1.7621	2	1088.54	-0.191511	27.1132	0	C1203	48.15	B1503	0.1226
Medium	ETFSGVYKKL	2	1	1	P62081		0	2.72135e+06	0.033	0.1401	2.61799	2	1171.64	-0.418044	40.9373	0	C1203	60	A6802	0.17
Medium	EIANILQEL	2	1	1	Q49AM1		0	6.55398e+06	0.033	0.1401	2.4687	2	1042.58	-0.958591	86.3385	0	C1203	44.44	A6802	0.0291
Medium	AKFKSSIY	1	1	1	Q9Y6V7		0	3.7874e+06	0.033	0.1401	2.41202	2	943.525	-0.198795	26.9676	0	C1203	40	B1503	0.3481
Medium	DTFRGVAFV	3	1	1	O15067		0	7.61483e+07	0.033	0.1401	2.22027	2	1011.53	-0.297576	62.3875	0	C1203	74.07	A6802	0.0107
Medium	LSKDGVLYV	2	1	1	Q9H1A4		0	8.71908e+06	0.033	0.1401	2.21422	2	993.561	-0.420216	49.0421	0	C1203	77.78	C1203	0.3348
Medium	EVIGKGPFSV	2	1	1	O14936		0	6.10579e+06	0.033	0.1401	2.09203	2	1032.57	-0.517433	53.8868	0	C1203	34.29	A6802	0.0362
Medium	LTDNIKKTL	1	1	1	A7E2V4		0	1.18789e+06	0.033	0.1401	2.08836	2	1045.63	-0.175686	27.9694	0	C1203	74.07	C1203	1.0477
Medium	EVIWLTQHV	1	1	1	Q9UJW0		0	4.04232e+06	0.033	0.1401	2.034	2	1124.61	0.433805	62.6937	0	C1203	37.04	A6802	0.0285
Medium	ETYFESARV	1	1	1	Q9H3L0		0	2.2732e+06	0.033	0.1401	2.01945	2	1101.52	-0.31933	44.7049	0	C1203	70.37	A6802	0.0088
Medium	YKKDVGKTL	1	1	1	Q9H2P0		0	436495	0.033	0.1401	1.99898	2	1051.61	-0.338421	18.7081	0	C1203	51.85	B1503	0.3592
Medium	EVFGRVQGV	1	1	1	P14621		0	1.93622e+06	0.033	0.1401	1.92947	2	990.537	-0.0934922	44.0506	0	C1203	48.15	A6802	0.0079
Medium	STYPRPHEYL	2	1	1	Q9UBR2		0	8.22421e+06	0.033	0.1401	1.5942	3	1262.62	0.239242	36.1569	0	C1203	51.43	A6802	0.2515
Medium	HALWVTVSSV	1	1	1	Q9Y2I2		0	3.71356e+06	0.034	0.1405	2.77863	2	1098.59	-4.0889	30.4612	0	C1203	57.14	A6802	1.9994
Medium	KKLDLISEL	1	1	1	Q2M389		0	1.23616e+07	0.034	0.1406	2.54122	2	1058.65	-0.427055	51.7108	0	C1203	48.15	B1503	0.3895
Medium	GKNFSKNIF	2	1	1	Q6P1J9		0	2.61034e+06	0.034	0.1405	2.48802	2	1054.57	0.105762	33.6876	0	C1203	29.63	B1503	0.2358
Medium	AKKDFEKKF	1	1	1	Q9Y6F1		0	362588	0.034	0.1406	2.42917	2	1140.64	0.0452818	18.045	0	C1203	40.74	B1503	0.3101
Medium	NVVDIQVNL	1	1	1	Q96RL7		0	1.04036e+06	0.034	0.1403	2.42648	2	1013.56	-0.744985	73.875	0	C1203	44.44	A6802	0.0096
Medium	RQAPTGLGL	1	1	1	Q9BX59		0	3.62079e+06	0.034	0.1406	2.40959	2	912.526	-0.223292	39.8186	0	C1203	51.85	B1503	0.0219
Medium	KVANIIAEV	2	1	1	P52306		0	5.63527e+06	0.034	0.1403	2.35066	2	956.577	-0.190427	49.8022	0	C1203	48.15	A6802	0.0455
Medium	ETIDLLVQI	1	1	1	Q9Y6X9		0	1.13439e+07	0.034	0.1405	2.22003	2	1043.6	-0.971315	89.2054	0	C1203	66.67	A6802	0.004
Medium	DVAQIIIRI	2	1	1	Q7L622		0	7.76208e+07	0.034	0.1403	2.12602	2	1040.65	-0.49176	75.2208	0	C1203	40.74	A6802	0.0471
Medium	EIFDSRGNPTV	2	1	1	P06733		0	4.267e+06	0.034	0.1401	2.08274	2	1234.61	-0.0425475	47.5707	0		0	A6802	0.5027
Medium	EALNVIVRL	3	1	1	Q5UIP0		0	1.18161e+07	0.034	0.1401	1.98347	2	1026.63	-0.474122	64.7956	0	C1203	81.48	A6802	0.2042
Medium	RTIDFVHQV	1	1	1	Q96JI7		0	1.65267e+06	0.034	0.1402	1.92672	2	1114.6	-0.34821	41.5138	0	C1203	74.07	A6802	0.0131
Medium	AKQRLQQLF	1	1	1	Q9P0U1		0	4.48158e+06	0.035	0.1414	2.47645	2	1131.66	-0.08456	37.4449	0	C1203	33.33	B1503	0.2919
Medium	SKRTGVQTF	1	1	1	P53621		0	5.19143e+06	0.035	0.1417	2.19858	2	1023.56	-0.414675	20.7904	0	C1203	37.04	B1503	0.0122
Medium	FSmCIEVLFL	1	1	1	O60503	M3(Oxidation)	0	5.76572e+06	0.035	0.1415	2.02556	2	1217.59	-0.113625	61.3501	0	C1203	60	A6802	5.4515
Medium	RQSPHSNLF	1	1	1	O43929		0	1.16059e+06	0.035	0.1414	1.95837	2	1085.55	-0.289123	26.0424	0	C1203	40.74	B1503	0.0019
Medium	AAADVLEFV	1	1	1	P53618		0	206617	0.035	0.1413	1.90426	2	934.488	0.068961	80.3799	0	C1203	85.19	A6802	0.0618
Medium	KKKEPEPNF	1	1	1	Q99460		0	422645	0.035	0.1411	1.75946	2	1116.6	-0.816642	19.5122	0	C1203	33.33	B1503	0.166
Medium	LQAVELQGL	1	1	1	Q96HA7		0	9.5886e+06	0.036	0.1451	2.41543	2	970.557	-0.137113	75.5667	0	C1203	40.74	B1503	1.3403
Medium	EGLNGRVTY	1	1	1	Q9NYQ8		0	5.50725e+06	0.036	0.1426	2.31929	2	1008.51	0.414277	17.4416	0	C1203	44.44	B1503	1.3935
Medium	SAIDFYRKF	1	1	1	Q9GZZ1		0	3.67449e+06	0.036	0.1429	2.21248	2	1146.59	-1.46905	51.3758	0	C1203	74.07	C1203	0.059
Medium	RQIPLAVLF	2	1	1	P04920		0	6.98603e+06	0.036	0.1425	2.06675	2	1056.66	-0.0583264	73.448	0	C1203	40.74	B1503	0.0057
Medium	GKSFSRSSF	1	1	1	O75820		0	635470	0.036	0.1434	2.04561	2	1002.5	-0.312919	23.9303	0	C1203	33.33	B1503	0.1646
Medium	SALEHVVEF	1	1	1	O75581		0	2.53108e+07	0.036	0.1432	1.99931	2	1030.52	-0.23493	56.1958	0	C1203	81.48	C1203	0.0225
Medium	LSAPIHTQM	1	1	1	Q8NG31		0	1.74373e+06	0.036	0.1452	1.98129	2	997.513	-0.524517	42.8614	0	C1203	70.37	C1203	0.0508
Medium	ETSPHTFQL	2	1	1	Q69YN4		0	1.72214e+07	0.036	0.1434	1.94969	2	1059.51	-0.379293	45.1897	0	C1203	77.78	A6802	0.0155
Medium	EVAKIIYIV	2	1	1	P25788		0	2.12721e+07	0.036	0.1426	1.59175	2	1047.64	-0.540825	64.9649	0	C1203	44.44	A6802	0.0073
Medium	KKLEKETTM	2	1	1	P40222		0	126509	0.036	0.1455	1.34742	2	1107.61	-0.482027	16.6567	0	C1203	37.04	B1503	0.2395
Medium	QTVGVIVRL	1	1	1	O00267		0	1.35805e+06	0.037	0.1469	2.34808	2	984.62	0.136623	55.6371	0	C1203	77.78	A6802	0.0189
Medium	KKLSSAVVF	2	1	1	O60934		0	7.45209e+06	0.037	0.1482	2.28465	2	978.598	-0.226079	35.2353	0	C1203	40.74	B1503	0.0252
Medium	HGTSLmNYL	1	2	2	Q16099;Q16478	M6(Oxidation)	0	1.20232e+07	0.037	0.1489	2.28328	2	1051.49	0.679626	79.1298	0	C1203	40.74	C1203	1.669
Medium	TTYPNTYIF	1	1	1	Q8TEL6		0	4.20331e+06	0.037	0.1503	2.18677	2	1119.54	0.20095	70.6805	0	C1203	70.37	C1203	0.0284
Medium	ISPSLNVSL	1	1	1	P03891		0	1.99708e+07	0.037	0.148	2.1066	2	929.53	-0.198385	68.9856	0	C1203	74.07	C1203	0.7299
Medium	TAFETIILL	1	1	1	A4D1E9		0	4.63684e+06	0.037	0.1479	2.09694	2	1020.6	-0.337741	93.9527	0	C1203	88.89	C1203	0.0213
Medium	FSQDHLVIY	1	1	1	Q9BW91		0	8.59886e+06	0.037	0.1479	1.83674	2	1121.56	-0.600995	55.6828	0	C1203	77.78	C1203	0.0724
Medium	TKKVTSVVF	1	1	1	Q9UMS4		0	4.61711e+06	0.037	0.1481	1.81564	2	1008.61	0.0217947	32.4913	0	C1203	37.04	B1503	0.1418
Medium	HQIKSLQY	3	1	1	Q9NW82		0	6.26473e+06	0.038	0.1539	2.47474	2	1016.55	-0.0163025	27.5112	0	C1203	26.67	B1503	0.0968
Medium	TKISTHVSF	1	1	1	Q8TEY7		0	8.08239e+06	0.038	0.1543	2.47462	2	1019.55	-0.839821	35.2059	0	C1203	37.04	B1503	0.0192
Medium	RSmLVLKDI	1	1	1	Q96PF1	M3(Oxidation)	0	6.28574e+06	0.038	0.1529	2.46499	2	1090.63	-3.24813	63.5312	0	C1203	62.96	C1203	4.0919
Medium	SAHSKVVIF	1	1	1	Q8IX04		0	3.75484e+06	0.038	0.1521	2.40181	2	987.562	-0.35956	34.8028	0	C1203	77.78	C1203	0.0602
Medium	FANGHVNSV	1	1	1	Q9NRL2		0	544918	0.038	0.1568	2.39053	2	944.458	-0.396898	27.7532	0	C1203	85.19	C1203	0.0128
Medium	EVIAVSEKV	2	1	1	Q14865		0	1.82258e+06	0.038	0.1522	2.22719	2	973.556	-0.361964	42.3363	0	C1203	37.04	A6802	0.0058
Medium	SAVGHVFSL	1	1	1	Q69YN4		0	2.39572e+06	0.038	0.1547	2.22685	2	916.489	0.0270542	53.2857	0	C1203	81.48	C1203	0.0113
Medium	NSYPHQLYT	1	1	1	Q8IZD2		0	941259	0.038	0.153	2.21866	2	1122.52	-0.580611	36.6084	0	C1203	44.44	A6802	1.1212
Medium	EVVDKINQV	1	1	1	Q8WXH0		0	9.24371e+06	0.038	0.1592	2.19385	2	1043.57	-1.31889	39.0392	0	C1203	44.44	A6802	0.0052
Medium	YAFVRPVIL	1	1	1	Q96S16		0	7.07395e+06	0.038	0.1613	2.09065	2	1077.65	0.325081	67.2818	0	C1203	88.89	C1203	0.0064
Medium	EISRIFHYI	2	1	1	Q96EK7		0	7.64689e+06	0.038	0.1534	2.08332	2	1177.64	-0.354416	56.5367	0	C1203	33.33	A6802	0.0377
Medium	RKVPGVTAI	1	3	3	Q06787;P51114;P51116		0	7.59486e+06	0.038	0.1576	2.0197	2	940.593	-0.867669	31.1474	0	C1203	40.74	B1503	0.0813
Medium	ELSKIIQKV	1	1	1	Q5T4S7		0	4.37854e+06	0.038	0.1605	2.0104	2	1057.66	-0.763099	39.6427	0	C1203	44.44	A6802	0.2094
Medium	RKSGVGNVF	1	2	2	Q13310;Q5JQF8		0	1.94774e+06	0.038	0.1594	1.9945	2	963.537	-0.185221	26.099	0	C1203	40.74	B1503	0.0085
Medium	RKDPNAEGRY	1	1	1	Q8N9N2		0	407337	0.038	0.1602	1.98984	3	1205.6	0.35082	16.2096	0	C1203	31.43	B1503	1.1362
Medium	ELSDVLIYL	1	1	1	Q9H773		0	1.27277e+07	0.038	0.1524	1.97959	2	1064.59	0.122783	97.0454	0	C1203	48.15	A6802	0.03
Medium	GKGFTRTSY	1	1	1	Q969J2		0	382733	0.038	0.1582	1.87199	2	1016.52	0.156987	21.7631	0	C1203	37.04	B1503	0.2263
Medium	ETSKYYVTI	1	2	2	P68104;Q5VTE0		0	8.30847e+06	0.038	0.1614	1.79423	2	1103.56	-0.215841	49.0351	0	C1203	70.37	A6802	0.063
Medium	HKYSGKEGDKF	1	1	1	P26447		0	154453	0.038	0.1611	1.7206	2	1295.64	0.144965	16.4576	0		0	B1503	1.2533
Medium	ETIGVVHLV	3	1	1	Q63HN8		0	4.77918e+07	0.038	0.1507	1.23297	2	966.562	-0.404836	57.9829	0	C1203	74.07	A6802	0.002
Medium	TVTDVVRFI	1	1	1	Q5VUG0		0	859110	0.039	0.1678	2.43641	2	1049.6	1.18714	66.6237	0	C1203	40.74	A6802	0.0588
Medium	FTSPLTHNV	1	1	1	Q96A29		0	2.90001e+06	0.039	0.1631	2.38192	2	1015.52	0.408128	44.3114	0	C1203	81.48	A6802	0.0046
Medium	GQRPTQPVY	1	1	1	Q9H0W8		0	4.11069e+06	0.039	0.1623	2.19255	2	1045.54	-0.255727	28.2355	0	C1203	48.15	B1503	0.0039
Medium	RLWEQLVHF	2	1	1	Q5JS54		0	2.51592e+07	0.039	0.1637	2.06488	2	1227.66	-0.0779476	64.2532	0	C1203	37.04	B1503	0.158
Medium	RAFGIPIRVY	2	1	1	P06493		0	1.27692e+06	0.039	0.1689	1.89173	2	1191.7	-0.193682	55.8358	0	C1203	77.14	B1503	0.1646
Medium	FASEYPLIL	1	1	1	Q9UPR0		0	4.62954e+06	0.039	0.162	1.85761	2	1052.57	0.0194557	84.2713	0	C1203	92.59	C1203	0.0334
Medium	GKAFSRSTY	1	2	2	Q7L945;Q9BS34		0	546345	0.04	0.1776	2.35604	2	1016.52	-0.14323	20.8866	0	C1203	44.44	B1503	0.0658
Medium	DSFNYFINV	4	1	1	Q9NW08		0	7.24719e+06	0.04	0.1732	2.23593	2	1118.52	0.0868635	88.3009	0	C1203	74.07	A6802	0.0663
Medium	DTAHVLFTL	2	1	1	Q6YHU6		0	1.43204e+07	0.04	0.1775	2.2021	2	1016.54	-0.0364384	72.0831	0	C1203	74.07	A6802	0.0241
Medium	RKKQSDVmRF	1	1	1	P61313	M8(Oxidation)	0	1.09083e+06	0.04	0.1782	2.19597	3	1310.7	0.299965	16.6426	0	C1203	28.57	B1503	0.3282
Medium	AKFGSKEEY	1	1	1	Q5VWQ8		0	1.6979e+06	0.04	0.1754	2.17682	2	1058.52	0.08234	21.7507	0	C1203	51.85	B1503	0.0236
Medium	YAFLREAL	2	1	1	Q15048		0	3.76143e+06	0.04	0.1764	2.12295	2	982.535	-0.672298	58.3993	0	C1203	83.33	C1203	0.5827
Medium	QVCAIIERV	1	2	2	Q99613;B5ME19		0	1.15799e+07	0.04	0.176	2.09991	2	1030.57	-0.565628	51.9815	0	C1203	40.74	A6802	0.5371
Medium	FTADKYHVV	1	1	1	Q8TED0		0	1.84842e+06	0.04	0.1763	1.8536	2	1079.55	-0.227769	36.0294	0	C1203	81.48	A6802	0.0077
Medium	EIQEFISFI	1	1	1	P78527		0	3.19993e+06	0.04	0.1724	1.74018	2	1125.58	0.206152	94.1346	0	C1203	37.04	A6802	0.0854
Medium	FFPDFIWTV	1	2	2	Q96PP9;Q8N8V2		0	2.29928e+06	0.04	0.1764	1.45366	2	1171.58	0.322555	105.716	0	C1203	51.85	A6802	0.5738
Medium	ETSPHVIQA	1	1	1	O75533		0	5.52093e+07	0.04	0.1752	1.31669	2	981.499	-0.781619	31.5642	0	C1203	48.15	A6802	0.0277
Medium	RQQQSQTAY	3	2	2	Q99613;B5ME19		0	1.08557e+06	0.041	0.1876	2.49387	2	1109.53	0.0572893	17.3386	0	C1203	37.04	B1503	0.0031
Medium	ETSSVVRKI	3	1	1	Q5SRE5		0	1.3113e+07	0.041	0.1829	2.20967	2	1018.59	-0.0219648	24.7268	0	C1203	74.07	A6802	0.1487
Medium	TQAPIFISF	1	1	1	Q15070		0	4.7959e+06	0.041	0.1883	1.92021	2	1023.55	-0.168483	85.3695	0	C1203	44.44	B1503	0.0037
Medium	DVAPFTTKI	1	1	1	Q15652		0	1.37e+06	0.042	0.194	2.2436	2	991.546	-0.282831	56.264	0	C1203	40.74	A6802	0.012
Medium	SQLPKLLVY	1	1	1	P11117		0	3.31399e+06	0.042	0.1998	2.12937	2	1060.64	-1.916	62.886	0	C1203	51.85	B1503	0.0043
Medium	EAAAVRALV	1	1	1	P54802		0	2.14792e+06	0.042	0.1928	2.03106	2	899.531	-0.42925	42.4953	0	C1203	77.78	A6802	0.0159
Medium	VVPQFVVFY	1	1	1	O14949		0	3.71832e+06	0.042	0.1932	1.74525	2	1097.6	-0.4051	88.4252	0	C1203	48.15	C1203	0.8996
Medium	RAFVHWYV	1	6	6	Q71U36;P68363;Q9BQE3;Q13748;P68366;Q9NY65		0	6.12527e+06	0.042	0.1963	1.64455	2	1077.56	-0.998665	48.7774	0	C1203	80	C1203	6.4415
Medium	RKLSVILIL	1	1	1	Q13433		0	4.83478e+07	0.042	0.1955	1.52236	2	1054.73	-0.0612103	60.2469	0	C1203	48.15	B1503	0.586
Medium	KATAYILSV	1	1	1	P01106		0	6.6521e+06	0.043	0.2124	2.4748	2	965.566	-0.636619	51.9711	0	C1203	81.48	C1203	0.2256
Medium	RLIPSLRTY	1	1	1	Q14204		0	2.98931e+06	0.043	0.2092	2.30384	2	1118.67	-0.285243	45.0984	0	C1203	51.85	B1503	0.009
Medium	MQYPGRSLVF	2	1	1	Q9GZR7		0	1.08551e+06	0.043	0.2095	2.2788	2	1197.61	-0.996902	58.8696	0	C1203	48.57	B1503	0.0063
Medium	SLAEVLQQL	1	1	1	Q6NUM9		0	1.82692e+07	0.043	0.212	2.06199	2	1000.57	-0.926926	53.8869	0	C1203	44.44	C1203	0.3628
Medium	HTVGIIVKT	1	1	1	Q96QT6		0	1.65835e+06	0.043	0.2104	2.0582	2	967.593	-0.166338	32.441	0	C1203	40.74	A6802	0.1209
Medium	SAFATPFLV	1	1	1	P15954		0	2.77557e+07	0.043	0.2007	1.99749	2	952.514	-0.116314	83.9763	0	C1203	81.48	A6802	0.086
Medium	AATPAVRTV	2	2	2	P11940;Q9H361		0	2.19062e+07	0.043	0.2078	1.6868	2	885.515	0.0170385	29.4472	0	C1203	96.3	C1203	0.1137
Medium	RKFPGRPEEEY	1	1	1	Q9NUQ8		0	5.86658e+06	0.043	0.2083	1.23125	3	1407.7	-0.0423238	27.2423	0		0	B1503	0.2524
Medium	KKFESPNIL	1	1	1	Q8NB16		0	1.36997e+07	0.044	0.2171	2.42289	2	1075.61	-1.70204	38.2753	0	C1203	48.15	B1503	0.0999
Medium	AKLAGDHIEY	1	1	1	Q15070		0	1.03829e+06	0.044	0.2199	2.32835	2	1116.57	0.18791	33.3857	0	C1203	37.14	B1503	0.1821
Medium	HAAELIKTV	1	1	1	Q8WUM4		0	1.64748e+06	0.044	0.2148	2.31855	2	981.572	-0.497239	31.8507	0	C1203	92.59	A6802	0.0764
Medium	FLYPFFGVL	1	1	1	Q9UKG4		0	8.15724e+06	0.044	0.2174	2.00879	2	1102.59	-2.66228	104.648	0	C1203	55.56	C1203	0.5973
Medium	RQLPAMTAL	1	1	1	Q13045		0	2.20807e+06	0.044	0.2216	1.98648	2	1000.56	-0.21567	49.5265	0	C1203	44.44	B1503	0.0154
Medium	ESADKFYGV	1	1	1	Q9UQE7		0	3.92994e+06	0.045	0.2261	2.2864	2	1015.47	-0.190365	43.4074	0	C1203	74.07	A6802	0.0065
Medium	AAASIANIV	1	1	1	P17987		0	2.86616e+06	0.045	0.2251	2.1734	2	829.478	-0.0862389	60.6995	0	C1203	85.19	A6802	0.4909
Medium	RKPFGSKmY	1	1	1	A5YKK6	M8(Oxidation)	0	1.60456e+06	0.045	0.2259	2.01746	2	1129.58	-0.543265	18.5049	0	C1203	40.74	B1503	0.2973
Medium	YVTTSTRTY	1	1	1	P08670		0	1.12374e+06	0.046	0.2362	2.16896	2	1091.54	-0.541337	28.9862	0	C1203	48.15	C1203	0.1046
Medium	RAAGVVLEm	1	1	1	Q9Y230	M9(Oxidation)	0	769528	0.046	0.2336	2.1445	2	961.514	-0.0623306	33.7728	0	C1203	85.19	C1203	0.0094
Medium	SQYQGVVVY	1	1	1	Q9Y221		0	5.64647e+07	0.046	0.2364	2.03249	2	1042.52	-0.788907	55.0815	0	C1203	51.85	B1503	0.0007
Medium	EVFDKLARV	1	1	1	O43505		0	1.15709e+06	0.046	0.2362	1.91881	2	1076.61	-0.245735	45.9962	0	C1203	44.44	A6802	0.0048
Medium	LKPGMVVTF	1	2	2	P68104;Q5VTE0		0	3.02486e+06	0.046	0.2358	1.89125	2	991.565	-0.0610916	57.5747	0	C1203	44.44	B1503	0.3724
Medium	YTSRIVVRL	1	1	1	Q9HBE1		0	1.03387e+07	0.046	0.2328	1.82163	2	1106.67	-0.39864	42.3664	0	C1203	81.48	A6802	0.0546
Medium	AIAPIIAAV	2	1	1	Q9BQ52		0	9.59375e+06	0.047	0.2401	2.36834	2	838.54	0.217349	74.7484	0	C1203	55.56	A6802	0.022
Medium	TSTDLLFHL	1	1	1	Q14181		0	3.4018e+06	0.047	0.239	2.20981	2	1046.55	-0.386192	71.2356	0	C1203	70.37	A6802	0.4531
Medium	EKGSDPmFYV	1	1	1	P60608	M7(Oxidation)	0	0	0.048	0.2459	2.35307	2	1188.52	-0.195974	62.2159	0	C1203	22.86	A6802	0.9981
Medium	KSKWRQAF	1	2	2	Q8IU85;Q96NX5		0	4.09849e+06	0.048	0.2457	2.29524	2	1050.58	-1.7173	43.1232	0	C1203	60	C1203	5.4017
Medium	KQFKSEAY	1	1	1	Q03001		0	949490	0.048	0.2422	2.26747	2	1000.51	-0.465085	19.5893	0	C1203	33.33	B1503	0.0268
Medium	AKFKDFYQF	1	1	1	Q6PH85		0	3.05113e+06	0.048	0.2442	2.24125	2	1193.6	-1.19766	49.9749	0	C1203	37.04	B1503	0.0113
Medium	VKEGVSAAF	1	1	1	Q7L1Q6		0	1.01765e+06	0.048	0.2431	2.20194	2	907.489	0.24543	36.7391	0	C1203	37.04	B1503	0.08
Medium	ITAPPTPGI	1	1	1	Q8NEZ4		0	2.21693e+06	0.048	0.2458	1.7927	2	866.498	-0.169448	57.0488	0	C1203	70.37	A6802	0.0335
Medium	ETAPDSYKV	1	1	1	Q14244		0	1.34331e+07	0.048	0.2446	1.61614	2	1009.48	0.0494431	32.6187	0	C1203	77.78	A6802	0.0058
Medium	ETAKATPRL	1	1	1	Q13428		0	6.33865e+06	0.048	0.2464	1.33257	2	986.563	-0.305739	22.4757	0	C1203	70.37	A6802	0.0701
Medium	EVSKIVSNV	1	1	1	Q5QJ74		0	2.07017e+06	0.049	0.2472	2.13999	2	974.552	-0.237098	37.4481	0	C1203	44.44	A6802	0.0069
Medium	KKNKIGAAF	1	1	1	Q2M389		0	358471	0.049	0.248	2.1124	2	976.593	-0.398197	19.6455	0	C1203	29.63	B1503	0.0061
Medium	LRNQLQSVY	1	1	1	Q9BSM1		0	7.5538e+06	0.049	0.2479	1.90015	2	1120.61	-0.392704	38.1855	0	C1203	40.74	B1503	0.1483
Medium	AHAHPQEVY	1	1	1	Q13433		0	185129	0.049	0.248	1.73643	2	1051.5	-0.289534	19.8986	0	C1203	48.15	B1503	0.1248
Medium	YKIYPGHGRRY	1	1	1	P83731		0	4.74193e+06	0.049	0.247	1.41227	3	1409.74	-0.0537964	21.7419	0		0	B1503	1.1484

## Sheet: Statistics
Total_Peptides	Tool	A*68:02	B*15:03	C*12:03
1467	Total Syfpeithi allelecoverage with threshold	0	0	429
	Total Syfpeithi allelecoverage with threshold %	0.0000	0.0000	0.2924
	Total NetMHC allelecoverage with threshold	0	0	0
	Total NetMHC allelecoverage with threshold %	0.0000	0.0000	0.0000
	Total NetMHC allelecoverage with 50nM threshold	0	0	0
	Total NetMHC allelecoverage with 50nM threshold %	0.0000	0.0000	0.0000
	Best Syfpeithi	0	0	1365
	Best Syfpeithi %	0.0000	0.0000	0.9305
	Best NetMHC	0	0	0
	Best NetMHC %	0.0000	0.0000	0.0000
	Best Syfpeithi with threshold	0	0	429
	Best Syfpeithi with threshold %	0.0000	0.0000	0.2924
	Best NetMHC with threshold	0	0	0
	Best NetMHC with threshold %	0.0000	0.0000	0.0000
	Best NetMHC with 50nM threshold	0	0	0
	Best NetMHC with 50nM threshold %	0.0000	0.0000	0.0000
