# Supplementary material for: TAPBPR mediates peptide dissociation from MHC class I using a leucine lever
Source: eLife. 2018 Nov 28;7:e40126. doi: 10.7554/eLife.40126 (PMC6307860; doi:10.7554/eLife.40126)
Supplement: Figure 5—source data 13. [file elife-40126-fig5-data13.xlsx]

## Sheet: Filteredpeptides
A6	Sequence	# PSMs	# Proteins	# Protein Groups	Protein Group Accessions	Modifications	ΔCn	Area	q-Value	PEP	XCorr	Charge	MH+ [Da]	ΔM [ppm]	RT [min]	# Missed Cleavages	best_Syf_Allele	best_Syf_Score	best_NetMHC_Allele_Rank	best_NetMHC_Rank
High	SKLPIGDVATQY	6	1	1	Q99832		0	1.13434e+07	0	3.34073e-19	4.24149	2	1291.69	-0.31039	54.89	0		0	B1503	1.2346
High	KKFFGEFTGF	19	1	1	Q15029		0	7.1409e+07	0	1.043e-10	4.18699	2	1207.61	-0.412349	57.2441	0	C1203	42.86	B1503	0.4285
High	GQYGNPLNKY	22	1	1	O14672		0	1.34487e+08	0	2.298e-11	3.96684	2	1153.56	-0.339192	40.2997	0	C1203	34.29	B1503	0.0242
High	IAAVIARFY	7	1	1	P40305		0	6.76308e+06	0	3.21e-11	3.90266	2	1023.6	-0.657788	61.9672	0	C1203	81.48	C1203	0.4494
High	RKYNELLKSY	13	1	1	P10909		0	2.16896e+07	0	1.231e-17	3.8667	3	1313.72	-0.104902	31.7515	0	C1203	34.29	B1503	0.1027
High	KQFPEVIKY	15	1	1	Q9UIF9		0	5.7022e+07	0	1.165e-09	3.86158	2	1151.65	-0.352442	43.4602	0	C1203	55.56	B1503	0.0014
High	EVFEDAAEIRL	9	1	1	P19338		0	5.96912e+06	0	1.083e-11	3.84844	2	1291.65	0.149011	66.6085	0		0	A6802	0.803
High	VGVDFALKV	12	1	1	O14966		0	9.60322e+06	0	4.118e-08	3.83366	2	947.556	-0.475617	64.1454	0	C1203	48.15	C1203	1.2819
High	NAYDFIMKL	10	1	1	P08183		0	4.48568e+07	0	5.966e-10	3.83088	2	1114.56	-0.295406	75.5461	0	C1203	85.19	C1203	0.0092
High	FAIDPHLLLSV	16	1	1	Q29RF7		0	7.21675e+07	0	3.421e-13	3.80963	2	1224.7	-0.468347	88.0395	0		0	A6802	1.1874
High	KKLEELEQKY	7	1	1	P42224		0	1.30965e+07	0	2.913e-06	3.80865	3	1307.72	0.181637	27.1174	0	C1203	31.43	B1503	0.9868
High	KAYFDVKEY	9	1	1	Q9UJX2		0	1.37833e+07	0	1.86e-11	3.79428	2	1162.58	-0.107444	41.1125	0	C1203	88.89	C1203	0.0916
High	YGYDNVKEY	5	1	1	Q96GN5		0	1.0665e+07	0	1.62e-14	3.78949	2	1150.5	-0.501606	40.0657	0	C1203	59.26	C1203	0.0081
High	KAFQKIVVL	55	2	2	Q7L1Q6;Q9Y6E2		0	9.19273e+08	0	0.0008051	3.78354	2	1045.68	-0.889741	44.3198	0	C1203	88.89	C1203	0.0077
High	YKIGDLTGY	12	1	1	Q9NVN8		0	1.27466e+08	0	3.772e-09	3.74319	2	1029.52	-1.27242	54.8009	0	C1203	44.44	B1503	0.0506
High	YCAEIAHNV	13	1	1	P62910		0	1.33955e+07	0	1.967e-09	3.71488	2	1019.46	-0.645706	38.1906	0	C1203	48.15	A6802	0.1841
High	TTYEGIFKTL	13	1	1	Q8WWM7		0	1.83091e+07	0	4.403e-08	3.70509	2	1172.62	-0.00232359	63.2626	0	C1203	54.29	A6802	0.1132
High	KLFGSTSSF	25	1	1	P08174		0	1.32265e+08	0	8.068e-09	3.69801	2	973.499	-0.20076	48.3907	0	C1203	37.04	B1503	0.0127
High	IGVDFALKV	12	2	2	Q13637;P57729		0	1.4344e+07	0	8.081e-08	3.68026	2	961.571	-0.43121	67.9243	0	C1203	44.44	C1203	1.1246
High	ALIEFIRSEY	28	1	1	P26639		0	1.38794e+08	0	6.271e-12	3.65107	2	1240.66	-0.284809	67.9659	0	C1203	31.43	B1503	1.0203
High	RKFTQLREY	7	1	1	O95625		0	8.60112e+06	0	0.0005302	3.63926	3	1240.68	-0.614653	25.8118	0	C1203	48.15	B1503	0.0127
High	ETADVIAKVAF	5	1	1	O43617		0	2.55665e+06	0	1.344e-08	3.61013	2	1163.63	-0.373553	62.6712	0		0	A6802	1.3198
High	GKLPAGGVLY	9	1	1	P48634		0	1.71388e+07	0	9.792e-08	3.60619	2	974.567	-0.238337	47.986	0	C1203	34.29	B1503	0.1953
High	KLVDFVIHF	13	1	1	P59998		0	3.55173e+07	0	9.948e-09	3.59268	2	1117.64	0.380658	69.9118	0	C1203	40.74	B1503	0.1146
High	FVNDIFERI	183	14	14	P33778;P62807;P58876;Q93079;P06899;O60814;Q99880;Q99879;Q99877;P23527;Q16778;Q5QNW6;Q8N257;P57053		0	1.88456e+09	0	1.156e-06	3.59086	2	1152.6	-0.579318	69.7004	0	C1203	37.04	A6802	0.0163
High	AAASAIKVI	7	1	1	P14902		0	6.20347e+06	0	9.003e-08	3.58683	2	843.53	-0.27462	41.8209	0	C1203	88.89	C1203	0.427
High	KKGPSGYGF	12	1	1	O14745		0	1.83309e+07	0	0.0005778	3.57514	2	940.488	-0.36302	25.8074	0	C1203	37.04	B1503	0.0927
High	AKYPHVEDY	21	1	1	P61289		0	3.8815e+07	0	9.24e-10	3.57496	2	1121.53	-0.589381	31.2946	0	C1203	55.56	B1503	0.0063
High	AKLPFTPLSY	3	1	1	Q9UM00		0	0	0	1.206e-06	3.5465	2	1136.63	-0.218255	66.6227	0	C1203	48.57	B1503	0.0699
High	KKHSQFIGY	22	4	4	Q58FF7;Q58FG0;P07900;P08238		0	86861777	0	3.924e-09	3.5411	2	1107.59	-0.597359	24.1561	0	C1203	44.44	B1503	0.0501
High	KHFGTILNY	17	2	2	Q13829;Q9H3F6		0	4.46139e+07	0	1.13e-06	3.53222	2	1092.58	-0.237673	43.069	0	C1203	51.85	B1503	0.0317
High	NVPEGLLATVTV	7	5	5	P54707;P05023;P50993;P13637;Q13733		0	9.44581e+06	0	6.431e-08	3.53117	2	1212.68	0.0230715	81.6643	0		0	A6802	0.9815
High	YAYDGKDYIAL	22	17	17	P01892;P30447;P05534;P10316;P01889;P30460;Q04826;P30479;P30480;P30486;P18464;P30490;P30498;Q31610;P30499;P04222;P17693		0	6.22088e+07	0	8.037e-12	3.53007	2	1291.62	-0.181511	60.1035	0		0	C1203	0.4676
High	IKYDPSIGIY	5	1	1	P62913		0	7.43876e+06	0	9.356e-14	3.51869	2	1168.62	-0.0666098	57.4575	0	C1203	42.86	B1503	0.0478
High	HKFPDEDSY	17	1	1	Q6VY07		0	3.38786e+07	0	3.756e-05	3.50931	2	1137.48	-0.190447	31.3467	0	C1203	48.15	B1503	0.1563
High	RKFPAGKVPAF	29	1	1	P26641		0	1.29286e+08	0	1.847e-09	3.50614	3	1217.71	-0.362848	35.6875	0		0	B1503	0.1649
High	FTADFVRQL	12	1	1	Q96Q15		0	1.69215e+07	0	2.798e-07	3.49461	2	1096.58	0.0360941	62.0079	0	C1203	85.19	C1203	0.0142
High	KSKDFVQVm	80	1	1	P78527	M9(Oxidation)	0	8.68168e+06	0	3.755e-07	3.48327	2	1097.57	-0.37988	29.446	0	C1203	70.37	C1203	0.0946
High	IKLPSVTSF	7	1	1	P18858		0	3.97479e+06	0	1.551e-07	3.48053	2	991.582	-0.77832	63.457	0	C1203	40.74	B1503	0.0047
High	VKVIQQESY	12	1	1	P60228		0	2.22372e+07	0	3.022e-08	3.47537	2	1093.59	-0.370153	35.2927	0	C1203	40.74	B1503	0.1997
High	GKITDFIKF	8	1	1	P62701		0	2.10475e+07	0	0.0008258	3.45519	2	1068.61	-0.160136	60.7911	0	C1203	33.33	B1503	0.0648
High	SGFSGVIRL	11	1	1	P11309		0	2.09344e+07	0	3.623e-09	3.45133	2	935.53	-0.532525	58.6688	0	C1203	51.85	C1203	0.15
High	SAISSVRLY	9	1	1	P42285		0	7.61168e+06	0	2.688e-06	3.43997	2	995.552	0.0595519	49.8678	0	C1203	85.19	C1203	0.0858
High	AAYSDGYGRVY	9	1	1	O43251		0	8.39002e+06	0	1.037e-12	3.43052	2	1221.55	0.110651	40.8092	0		0	B1503	1.0068
High	AQLHPLSGY	5	1	1	Q7L7V1		0	2.84092e+06	0	3.551e-05	3.42553	2	985.51	-0.621219	41.4957	0	C1203	40.74	B1503	0.0144
High	VKVPTTLAEY	3	2	2	P49427;Q712K3		0	3.25666e+06	0	7.637e-07	3.4197	2	1120.62	-0.840901	52.3319	0	C1203	34.29	B1503	0.232
High	NTVDFFNQI	28	2	2	Q9H8S9;Q7L9L4		0	1.73939e+08	0	0.0001166	3.41725	2	1097.53	-0.842939	78.1546	0	C1203	62.96	A6802	0.0064
High	GKIFTFGSY	6	3	3	P51003;Q9NRJ5;Q9BWT3		0	4.09798e+06	0	0.0003819	3.41574	2	1019.52	-1.24776	58.8947	0	C1203	37.04	B1503	0.3162
High	YKLFGSTSSF	2	1	1	P08174		0	1.45081e+06	0	0.001306	3.4101	2	1136.56	-0.302714	58.6239	0	C1203	40	B1503	0.1358
High	DTFSGIGKKFGL	8	1	1	Q15847		0	1.10688e+07	0	0.00405	3.40824	2	1269.68	0.138822	62.1655	0		0	A6802	1.1225
High	YKAAAGEDY	15	1	1	P23381		0	2.59138e+07	0	1.35e-06	3.39991	2	987.441	-0.444063	25.8052	0	C1203	44.44	B1503	0.2533
High	NAANIFERL	9	2	2	Q9Y6D6;Q9Y6D5		0	1.39385e+07	0	7.707e-06	3.39617	2	1047.56	-1.23042	57.5128	0	C1203	77.78	A6802	0.1099
High	AKKISQLGY	10	1	1	P26196		0	9.42055e+06	0	9.341e-06	3.3952	2	1007.59	-0.378137	27.1243	0	C1203	44.44	B1503	0.2744
High	GKYFGGVLEY	13	1	1	O94955		0	3.31878e+07	0	2.429e-07	3.38494	2	1132.57	-0.163372	59.1556	0	C1203	40	B1503	0.08
High	AKLDHVNIVHY	3	1	1	P19525		0	2.97975e+06	0	2.031e-09	3.38365	3	1308.71	0.633394	36.9453	0		0	B1503	0.8505
High	SQFGGGSQY	14	1	1	O15371		0	4.54952e+07	0	0.0004279	3.37167	2	930.395	-0.286158	36.4919	0	C1203	44.44	B1503	0.0013
High	HKVETFSGVY	5	1	1	P62081		0	1.03988e+07	0	1.993e-05	3.37122	2	1166.58	-0.565478	35.5129	0	C1203	34.29	B1503	0.5763
High	YQFTGIKKY	18	1	1	Q96IX5		0	7.59205e+07	0	2.31e-07	3.37078	2	1147.61	-0.505422	37.6432	0	C1203	51.85	B1503	0.0015
High	VQGIFVEKY	4	3	3	P62834;P61224;A6NIZ1		0	1.67284e+07	0	5.688e-05	3.36819	2	1082.59	-1.06194	51.007	0	C1203	44.44	B1503	0.2769
High	GKLKQFDAY	9	1	1	Q9Y282		0	1.8993e+07	0	0.004146	3.36378	2	1069.57	-0.833272	31.0834	0	C1203	37.04	B1503	0.2617
High	KKYGEALGIKY	2	1	1	Q9UHL9		0	1.99991e+06	0	0.0004765	3.35757	3	1269.72	-0.0506995	34.4897	0		0	B1503	0.4254
High	GKVGGLLAF	16	1	1	P28340		0	4.7715e+07	0	1.48e-05	3.35508	2	861.519	-0.0552826	59.3067	0	C1203	37.04	B1503	0.0193
High	NAFSGVmmL	76	1	1	Q9NTX5	M7(Oxidation); M8(Oxidation)	0	5.15428e+06	0	0.0005899	3.34255	2	1001.44	-0.212301	66.6683	0	C1203	85.19	C1203	0.0302
High	KQIHFLYQY	5	1	1	Q14204		0	4.82956e+06	0	1.553e-06	3.33911	2	1239.65	0.151638	46.3315	0	C1203	37.04	B1503	0.0595
High	GKKLFGEGY	8	1	1	Q92624		0	4.35763e+06	0	0.0002607	3.33758	2	998.53	-0.525176	32.1121	0	C1203	37.04	B1503	0.5297
High	SAVDFIRTL	27	1	1	Q9UEE5		0	220647011	0	4.213e-06	3.33567	2	1021.57	-0.463987	67.1151	0	C1203	88.89	C1203	0.0059
High	SAYGSVKAY	27	2	2	P07355;A6NMY6		0	1.26527e+08	0	1.355e-05	3.33551	2	945.467	-0.390897	31.9904	0	C1203	88.89	C1203	0.0083
High	GKSPLFGQYF	4	1	1	Q5VT66		0	1.9078e+06	0	2.899e-05	3.33224	2	1143.58	-0.267483	64.4197	0	C1203	37.14	B1503	0.6991
High	SKLSFSQVF	11	1	1	Q9UJX4		0	2.11971e+07	0	4.492e-07	3.32994	2	1042.56	-0.820578	59.1932	0	C1203	37.04	B1503	0.031
High	RQYGSEGRFTF	8	2	2	Q7Z7H5;Q9BVK6		0	1.60103e+07	0	2.228e-06	3.31988	3	1347.64	-0.493874	39.4487	0		0	B1503	0.1337
High	NTFEFMDKL	2	1	1	O75874		0	1.44857e+06	0	8.682e-06	3.29909	2	1144.53	-0.347875	66.601	0	C1203	74.07	A6802	0.0276
High	GKIADRFLLY	4	1	1	P61968		0	1.24247e+07	0	1.239e-07	3.29768	2	1195.68	-0.326427	53.9399	0	C1203	31.43	B1503	0.7764
High	VTTDIQVKV	9	1	1	O00267		0	4.22265e+07	0	0.0002479	3.29567	2	1002.58	-0.523852	46.2436	0	C1203	77.78	A6802	0.0369
High	TTFDKEFLL	12	1	1	O60306		0	1.39566e+07	0	0.001239	3.28517	2	1113.58	-0.120485	66.5101	0	C1203	74.07	A6802	0.0214
High	SNSDVIRQV	12	1	1	Q9Y5K5		0	3.23752e+07	0	0.001099	3.28506	2	1017.53	-0.295071	33.5275	0	C1203	51.85	A6802	1.2171
High	GKLLIGTLY	12	1	1	Q15165		0	1.31514e+07	0	5.021e-09	3.27796	2	977.603	-0.329959	61.3305	0	C1203	37.04	B1503	0.2399
High	TAVALLRLL	18	1	1	Q14165		0	1.50772e+07	0	1.143e-07	3.27247	2	969.645	-0.404374	75.8588	0	C1203	77.78	C1203	0.5334
High	HQITVLHVY	10	1	1	Q9NYP7		0	1.17732e+07	0	0.001491	3.26993	2	1109.61	-0.49978	43.3122	0	C1203	40.74	B1503	0.0082
High	VKLPSGEDY	11	1	1	Q9Y2Z0		0	3.64179e+07	0	8.817e-06	3.26857	2	1007.5	-0.241498	41.5917	0	C1203	48.15	B1503	0.276
High	KQIESKTAF	14	1	1	P10599		0	2.27246e+07	0	0.0003544	3.26675	2	1051.58	-0.683785	23.0226	0	C1203	33.33	B1503	0.0018
High	GKVGFQSFF	13	1	1	P60903		0	1.7175e+07	0	0.0002073	3.26627	2	1016.52	-0.514979	63.2009	0	C1203	33.33	B1503	0.296
High	KAIDYIRFL	11	1	1	P36956		0	2.10642e+07	0	3.511e-05	3.26372	2	1138.66	0.287833	61.5812	0	C1203	85.19	C1203	0.0125
High	SAVNIIRTF	7	1	1	P29728		0	3.47723e+06	0	2.611e-05	3.26293	2	1020.58	-0.274037	56.4491	0	C1203	77.78	C1203	0.0226
High	TTVEIFNKL	12	1	1	Q96QK1		0	2.39795e+08	0	0.0008871	3.25733	2	1064.6	-1.0328	58.906	0	C1203	70.37	A6802	0.0152
High	VKVDLSEKY	4	1	1	P43243		0	3.51954e+06	0	0.0003838	3.25621	2	1080.59	-0.712816	36.6087	0	C1203	44.44	B1503	0.1387
High	FKFVEQQSY	3	1	1	Q99590		0	4.47132e+06	0	1.362e-06	3.25181	2	1175.57	-0.323072	48.5839	0	C1203	44.44	B1503	0.0346
High	YKVEYPIMY	6	1	1	O14880		0	7.43564e+06	0	5.429e-09	3.25031	2	1205.59	0.186541	60.5625	0	C1203	51.85	B1503	0.0153
High	AKYESQTSF	9	1	1	Q9P0U4		0	6.90419e+06	0	6.282e-06	3.25004	2	1060.49	-0.380083	30.2398	0	C1203	40.74	B1503	0.0018
High	GKLGFLASY	6	1	1	Q12772		0	1.18364e+07	0	2.961e-05	3.24575	2	955.525	-0.0790122	56.8093	0	C1203	40.74	B1503	0.0566
High	KKIEDLIKY	7	1	1	O75935		0	9.74578e+06	0	0.0003036	3.24479	2	1149.69	-0.883826	39.6189	0	C1203	44.44	B1503	0.0192
High	FAMEFVKYY	2	1	1	Q8IWV7		0	2.79421e+06	0	6.052e-09	3.23718	2	1197.56	-0.0537468	68.4741	0	C1203	88.89	C1203	0.0073
High	GKYFSLEGY	6	1	1	E7ETH6		0	6.03696e+06	0	3.037e-06	3.2277	2	1063.51	-0.749133	55.6104	0	C1203	40.74	B1503	0.2709
High	IATSQNRIY	7	1	1	Q99623		0	7.39127e+06	0	0.003692	3.225	2	1065.57	-0.332523	31.8416	0	C1203	81.48	B1503	1.1557
High	YQYLEQSKY	3	1	1	Q9BTE7		0	2.54291e+06	0	1.01e-08	3.22177	2	1221.58	0.124143	40.591	0	C1203	44.44	B1503	0.0039
High	RTTDIVIRI	19	1	1	Q9C0C9		0	7.79812e+07	0	5.738e-06	3.22127	2	1086.66	-1.02007	46.8874	0	C1203	70.37	A6802	0.1854
High	SSYLFIVKY	10	1	1	Q96QD8		0	1.9105e+07	0	3.428e-06	3.21984	2	1119.61	-0.149458	67.1014	0	C1203	77.78	C1203	0.3078
High	IKISNPTEF	10	1	1	Q9BXS6		0	2.63531e+07	0	7.298e-06	3.21571	2	1048.57	-1.11733	50.4711	0	C1203	40.74	B1503	0.0114
High	GKAFFLSSY	10	1	1	O75123		0	1.42505e+07	0	5.628e-05	3.21486	2	1019.52	0.189035	57.7242	0	C1203	40.74	B1503	0.1579
High	DVNAIIHYL	9	1	1	P09914		0	9.96259e+06	0	2.123e-06	3.21285	2	1057.57	-0.371569	75.7054	0	C1203	40.74	A6802	0.0137
High	FGFHKPKMY	12	1	1	Q9NP50		0	3.24775e+07	0	6.378e-06	3.21148	2	1154.58	-0.000634429	35.0417	0	C1203	51.85	C1203	0.1929
High	KKVGIVGKY	8	1	1	P61513		0	7.87508e+06	0	3.463e-07	3.2111	2	991.629	-0.483215	21.5073	0	C1203	44.44	B1503	0.0655
High	KKIEKLEEY	8	1	1	O95786		0	1.35269e+07	0	1.798e-05	3.21053	2	1179.66	0.0200086	22.7673	0	C1203	44.44	B1503	0.027
High	MKLLTGLVF	7	2	2	P0DJI8;P0DJI9		0	4.61486e+06	0	3.453e-06	3.21014	2	1021.61	-0.431428	76.7461	0	C1203	37.04	B1503	0.1401
High	IKISEGTGF	2	1	1	Q9Y2R4		0	2.28037e+06	0	1.973e-07	3.20872	2	951.514	-0.562908	45.2626	0	C1203	33.33	B1503	0.0238
High	NKYLTAEAF	3	1	1	Q16658		0	1.19156e+07	0	0.0005468	3.2067	2	1056.54	-0.474419	47.8859	0	C1203	33.33	B1503	0.1519
High	FIYDSVKVY	6	1	1	Q00325		0	6.056e+06	0	3.412e-09	3.20638	2	1133.59	-0.166981	60.0071	0	C1203	59.26	C1203	0.0117
High	KKPITTGGVTY	11	1	1	Q14192		0	1.30334e+07	0	0.0006354	3.19938	2	1164.66	-0.158266	27.9467	0		0	B1503	0.9535
High	FSFDYIVKW	6	1	1	Q9BSJ2		0	8.27181e+06	0	3.636e-06	3.19748	2	1204.6	-0.164433	81.7005	0	C1203	48.15	C1203	0.2257
High	KKYGPKGYGY	6	2	2	P21291;Q16527		0	4.41674e+06	0	9.223e-07	3.19484	2	1160.61	-0.403841	21.1844	0	C1203	42.86	B1503	0.1239
High	KLDEVPKVY	3	1	1	Q5UIP0		0	3.32448e+06	0	0.002521	3.19446	2	1090.61	-0.247594	40.5913	0	C1203	51.85	B1503	0.2153
High	RKLPEKTQTF	6	1	1	Q96SY0		0	6.28171e+06	0	9.749e-10	3.19142	3	1247.71	0.0454667	22.9456	0	C1203	34.29	B1503	0.1149
High	DTAEIFHSA	11	1	1	Q92538		0	2.34434e+07	0	6.752e-06	3.18525	2	990.453	-0.180779	44.8257	0	C1203	37.04	A6802	0.0068
High	EAFQGTKVFV	10	1	1	P61289		0	1.01498e+07	0	0.001139	3.18299	2	1125.59	-0.886816	52.8441	0	C1203	68.57	A6802	0.1825
High	KQTQTFTTY	8	3	3	P54652;P17066;P11142		0	6.53374e+06	0	6.792e-06	3.18179	2	1117.55	-0.341593	32.8471	0	C1203	40.74	B1503	0.0027
High	SIAGIFKEV	17	1	1	Q9NQQ7		0	2.09667e+07	0	0.002835	3.18066	2	963.551	-0.379385	60.6286	0	C1203	51.85	A6802	0.0436
High	VKIQKHVTF	8	1	1	P23381		0	9.59814e+06	0	0.0002265	3.17271	2	1099.66	-0.224066	26.6329	0	C1203	40.74	B1503	0.0184
High	SHYPFFSTF	10	1	1	Q8WXG6		0	5.78807e+06	0	0.0003118	3.17162	2	1132.51	-0.240366	68.0588	0	C1203	44.44	B1503	0.0742
High	SAVADVRLY	3	1	1	Q92521		0	0	0	0.0001694	3.17154	2	993.536	-0.232391	49.3636	0	C1203	81.48	C1203	0.3769
High	AAFLKAIGY	7	1	1	O75533		0	1.64985e+07	0	1.66e-10	3.16975	2	953.545	-0.258667	58.3705	0	C1203	85.19	C1203	0.1556
High	HVVDFFNRV	18	1	1	Q96BX8		0	3.9325e+07	0	0.001316	3.16168	2	1132.59	-0.611319	51.4178	0	C1203	40.74	A6802	0.0068
High	RAFEYEIRF	18	1	1	O60566		0	1.0045e+08	0	0.001904	3.15569	3	1230.63	0.611644	54.9698	0	C1203	77.78	B1503	0.0486
High	DVDVSLPKV	12	1	1	Q09666		0	7.90113e+06	0	0.0007966	3.1528	2	971.541	-0.336983	60.4128	0	C1203	37.04	A6802	0.6227
High	YKAPITNEF	8	1	1	Q9Y4X0		0	6.28152e+06	0	4.078e-07	3.15193	2	1082.55	-0.598873	47.4026	0	C1203	48.15	B1503	0.0073
High	GKYIPKQSF	11	1	1	Q9P0I2		0	3.10443e+07	0	7.441e-05	3.14024	2	1067.59	-0.585569	29.977	0	C1203	33.33	B1503	0.022
High	DTFVHVTDL	14	1	1	P62263		0	3.29227e+07	0	9.038e-06	3.13765	2	1046.52	-0.0333604	61.975	0	C1203	74.07	A6802	0.4268
High	DTFFRPLNV	12	1	1	Q13444		0	2.31944e+07	0	1.03e-05	3.13726	2	1108.58	-0.514868	68.9412	0	C1203	77.78	A6802	0.0509
High	SGYYRVSSY	6	1	1	Q9UNQ0		0	4.33921e+06	0	0.003228	3.1367	2	1081.49	-0.885088	36.7008	0	C1203	44.44	C1203	0.065
High	KAITFVTQY	9	1	1	Q9H0S4		0	2.29155e+07	0	0.0004438	3.13373	2	1070.59	-1.74863	50.204	0	C1203	77.78	C1203	0.0505
High	FKFmPPPTY	11	1	1	Q9H3M7	M4(Oxidation)	0	9.91665e+06	0	0.0001121	3.13177	2	1143.55	0.207011	57.0382	0	C1203	51.85	B1503	0.0044
High	YIKDFFEQm	10	1	1	Q5U649	M9(Oxidation)	0	3.95503e+06	0	1.621e-07	3.12892	2	1236.56	-0.388261	55.7819	0	C1203	37.04	C1203	0.1321
High	TAAQVARVL	11	1	1	A5YKK6		0	1.59545e+07	0	0.0005247	3.12887	2	928.557	-0.470478	39.2821	0	C1203	85.19	C1203	0.1716
High	FGFPGERTY	16	1	1	Q9Y4K0		0	1.20189e+08	0	7.572e-10	3.12826	2	1073.5	-0.964487	51.2379	0	C1203	59.26	C1203	0.0252
High	YKEDHPFEY	9	1	1	Q9H0R8		0	9.21442e+06	0	1.394e-06	3.12818	2	1227.53	-0.129985	36.1671	0	C1203	51.85	B1503	0.1293
High	KKFHGYFKF	4	1	1	P36639		0	7.66083e+06	0	0.0009456	3.1248	3	1201.65	-0.181756	30.4367	0	C1203	33.33	B1503	0.0295
High	VTYNYPVHY	5	1	1	Q9NV96		0	8.01425e+06	0	8.867e-05	3.11891	2	1155.55	0.0981086	47.7213	0	C1203	81.48	C1203	0.0317
High	GKFNVLLTTY	6	2	2	P51531;P51532		0	5.39384e+06	0	0.004242	3.11364	2	1155.64	-0.48883	62.4729	0	C1203	37.14	B1503	0.5712
High	KQIFETIYY	12	1	1	P23921		0	2.61118e+07	0	3.658e-07	3.11341	2	1204.62	-0.157653	60.4063	0	C1203	40.74	B1503	0.012
High	ETFPANIQV	13	1	1	Q5VYK3		0	1.82914e+08	0	7.372e-05	3.11313	2	1018.52	0.00200383	66.9069	0	C1203	81.48	A6802	0.0025
High	GKKKYETEF	15	1	1	Q96QD8		0	4.4865e+07	0	0.002131	3.11053	2	1129.59	-0.259143	19.8729	0	C1203	33.33	B1503	0.1692
High	KIYEPPRYm	6	1	1	Q9H2P9	M9(Oxidation)	0	5689333	0	0.001657	3.10667	3	1212.61	0.0438595	34.8077	0	C1203	44.44	C1203	0.0105
High	TSAAIYHVL	3	1	1	P46977		0	3.73529e+06	0	3.13e-05	3.10559	2	974.53	-0.517587	50.0585	0	C1203	74.07	A6802	0.2433
High	SKYEALQTF	9	2	2	O15525;O60675		0	9.28018e+06	0	3.658e-06	3.10552	2	1086.55	-0.743028	46.4754	0	C1203	40.74	B1503	0.0033
High	RLYGPSSVSF	14	1	1	P50454		0	3.78941e+07	0	2.996e-06	3.10511	2	1112.57	-0.756683	52.7122	0	C1203	42.86	B1503	0.1323
High	NVVDVFHAV	12	1	1	Q15262		0	2.05588e+07	0	4.19e-07	3.10427	2	999.525	-0.413272	60.9974	0	C1203	40.74	A6802	0.0022
High	SKEDDVRQY	7	1	1	P62753		0	2.82591e+06	0	0.0001748	3.10416	2	1139.53	-0.230795	19.966	0	C1203	48.15	B1503	0.5897
High	GKFGGDFLVY	9	1	1	Q9BSV6		0	9.26001e+07	0	3.184e-09	3.09851	2	1102.56	-0.342129	64.1879	0	C1203	54.29	B1503	0.1223
High	SKIAGILHY	7	1	1	P14735		0	5.49954e+06	0	0.001983	3.09805	2	1001.58	-0.430444	42.583	0	C1203	44.44	B1503	0.0072
High	GKPPFEANTY	12	1	1	O14965		0	3.25962e+07	0	2.99e-09	3.09318	2	1123.54	-0.519728	39.8376	0	C1203	31.43	B1503	0.921
High	EVFRIGNVEI	9	1	1	P15927		0	9.97757e+06	0	5.889e-06	3.09236	2	1175.64	-0.0578391	71.8074	0	C1203	20	A6802	0.2481
High	YKIAFPYLY	9	1	1	Q6P2Q9		0	9.25514e+06	0	1.624e-06	3.09182	2	1177.63	-0.22711	74.4178	0	C1203	44.44	B1503	0.0814
High	TLADVLYHV	15	1	1	Q9UBL3		0	1.37294e+07	0	2.753e-05	3.08971	2	1030.56	-0.109723	66.97	0	C1203	44.44	A6802	0.0213
High	VKYIQQENF	3	1	1	Q6PJF5		0	5.61198e+06	0	0.002466	3.08936	2	1168.6	-0.585896	42.8382	0	C1203	37.04	B1503	0.1248
High	YSFGHPSSV	15	1	1	P31327		0	4.69635e+07	0	2.001e-07	3.0872	2	980.447	-0.424661	39.1134	0	C1203	81.48	C1203	0.0052
High	YAFAHILTV	8	1	1	O75204		0	2.6262e+07	0	6.531e-10	3.08362	2	1034.57	-0.146187	66.4612	0	C1203	92.59	C1203	0.0029
High	TTTEITHHGT	5	1	1	P15924		0	4.00493e+06	0	0.0006082	3.08257	2	1097.52	0.0574892	17.2888	0	C1203	20	A6802	1.9445
High	YKYQHDDGRVSY	8	1	1	P60983		0	4.22137e+06	0	1.419e-17	3.08117	3	1530.7	0.0244609	26.0401	0		0	B1503	0.1119
High	AQIKFLNTY	9	1	1	Q8ND90		0	1.2397e+07	0	0.001338	3.06771	2	1097.6	0.486155	54.3429	0	C1203	44.44	B1503	0.0029
High	YKILGGSVL	12	1	1	Q15843		0	2.64039e+07	0	2.359e-06	3.0662	2	949.571	-0.479873	57.7946	0	C1203	44.44	B1503	0.1272
High	SAYEIIRDY	14	1	1	O60287		0	2.88612e+07	0	0.001122	3.06233	2	1129.55	-0.454887	53.0377	0	C1203	88.89	C1203	0.0162
High	EVSFVIHNL	31	2	2	P49903;Q99611		0	1.02157e+08	0	4.507e-07	3.06126	2	1057.57	-0.842727	61.728	0	C1203	44.44	A6802	0.0164
High	TTFEHAHNM	6	1	1	P13639		0	2.34691e+06	0	9.551e-05	3.05823	2	1087.46	-0.578998	22.2544	0	C1203	66.67	A6802	0.0346
High	TVFNFQEKV	9	1	1	Q14204		0	1.47797e+07	0	0.00137	3.05125	2	1111.58	-0.756693	53.8747	0	C1203	40.74	A6802	0.0273
High	AKAPPTACY	23	1	1	P17676		0	3.81806e+07	0	8.579e-05	3.05094	2	921.45	-0.159173	28.6169	0	C1203	51.85	B1503	0.027
High	FVNEIISRI	6	1	1	P43246		0	8.24049e+06	0	1.242e-07	3.04716	2	1090.63	-0.0324768	63.663	0	C1203	40.74	A6802	0.022
High	GKYLELLGY	7	1	1	O94979		0	2.06234e+07	0	8.843e-08	3.04712	2	1055.58	-0.583203	65.7597	0	C1203	44.44	B1503	0.1584
High	AAYGYGIRY	8	3	3	P11216;P06737;P11217		0	3.98416e+07	0	0.003537	3.04301	2	1033.51	-0.582691	45.724	0	C1203	88.89	C1203	0.0164
High	TTYDLTHTL	12	1	1	Q9NTJ5		0	2.50189e+07	0	0.0002265	3.04178	2	1064.53	-0.760233	51.5557	0	C1203	77.78	A6802	0.0051
High	YLADIFTKL	13	1	1	Q49AG3		0	3.05508e+07	0	4.68e-06	3.04047	2	1083.61	-0.510835	75.6311	0	C1203	48.15	C1203	0.0344
High	FAFSGVLRA	12	1	1	Q92766		0	5.74177e+07	0	6.815e-06	3.0401	2	967.536	-0.476717	60.8494	0	C1203	55.56	C1203	0.208
High	RQYAKDIGF	10	1	1	P62273		0	2.91195e+07	0	2.37e-05	3.03831	2	1097.57	-0.631925	35.3995	0	C1203	37.04	B1503	0.0026
High	IKKEFDKKY	8	2	2	P63167;Q96FJ2		0	4.86699e+06	0	0.0001956	3.03714	3	1198.68	0.303247	18.3608	0	C1203	44.44	B1503	0.2653
High	FASGLIHRV	61	1	1	Q8N6L1		0	8.84694e+08	0	5.788e-05	3.03658	2	999.572	-1.34176	37.8544	0	C1203	88.89	A6802	0.0309
High	RKFDAIYKY	7	1	1	Q5C9Z4		0	1.534e+07	0	8.015e-05	3.03637	3	1203.65	0.0016152	33.8047	0	C1203	48.15	B1503	0.0043
High	FAYPAIRYL	55	1	1	P51398		0	3.65591e+08	0	1.829e-05	3.0265	2	1113.61	-0.322423	66.9606	0	C1203	96.3	C1203	0.0012
High	AAYLRALSL	6	1	1	O15294		0	4.85352e+06	0	0.0001773	3.02588	2	977.577	-0.638547	59.3683	0	C1203	85.19	C1203	0.0112
High	KHFEVLISY	7	1	1	Q86Y91		0	1.02219e+07	0	0.0006485	3.02367	2	1135.61	-0.519569	50.7118	0	C1203	48.15	B1503	0.0334
High	YAIDNPLHY	4	1	1	A5YKK6		0	6.8281e+06	0	0.0003088	3.02272	2	1105.53	-0.224184	57.1292	0	C1203	88.89	C1203	0.0069
High	GKVGAHAGEY	6	1	1	P69905		0	1.55438e+06	0	0.001994	3.02207	2	988.484	-0.415557	18.1521	0	C1203	31.43	B1503	0.8026
High	VKTGTITTF	22	1	1	P13639		0	1.38225e+08	0	0.002041	3.02202	2	967.546	-0.279511	40.9228	0	C1203	44.44	B1503	0.0132
High	GKLIIWDSY	4	3	3	P62873;P62879;Q9HAV0		0	2.32523e+06	0	0.000232	3.01945	2	1094.59	-0.604207	64.5358	0	C1203	37.04	B1503	1.0181
High	TASPVIKAV	12	1	1	Q8WU10		0	1.33367e+08	0	0.002726	3.01917	2	885.54	-0.0558563	37.007	0	C1203	92.59	A6802	0.084
High	DTAEIIKTL	7	1	1	P82909		0	1.86922e+07	0	0.0007442	3.01666	2	1003.57	-0.716965	59.272	0	C1203	85.19	A6802	0.0243
High	AQGPTPRYF	12	1	1	O60427		0	3.55864e+08	0	0.001639	3.00766	2	1036.52	-0.634777	40.3607	0	C1203	48.15	B1503	0.0108
High	GKIQFGYVY	11	1	1	Q969M3		0	5.98876e+07	0	2.322e-06	3.00659	2	1074.56	-0.175135	54.6656	0	C1203	40.74	B1503	0.035
High	KKFVETPGQKY	8	1	1	P05455		0	3.78287e+06	0	1.445e-06	3.00077	3	1324.73	0.142387	23.932	0		0	B1503	0.655
High	ILGPPGSVY	9	3	3	P51965;Q96LR5;Q969T4		0	6.0159e+06	0	0.002086	2.99962	2	902.498	-0.354496	60.6396	0	C1203	48.15	B1503	0.0572
High	VKGVSLSSY	4	1	1	Q9Y3B1		0	4.29901e+06	0	0.003473	2.9974	2	939.514	-0.418881	40.1501	0	C1203	40.74	B1503	0.2068
High	FISEIIHQL	6	1	1	Q9C040		0	5.81594e+06	0	5.72e-08	2.98614	2	1099.61	0.0093871	69.0948	0	C1203	51.85	A6802	0.0141
High	SVITQVFHV	13	1	1	Q00341		0	54759020	0	9.8e-05	2.98236	2	1029.57	-0.227216	65.8975	0	C1203	40.74	A6802	0.03
High	GKFPSLLTH	21	1	1	P62906		0	3.82898e+08	0	0.0005518	2.98159	2	999.562	-0.721615	43.5435	0	C1203	18.52	B1503	0.9746
High	DLSNIINKL	7	1	1	Q9GZL7		0	8.83552e+06	0	0.0002082	2.98154	2	1029.59	0.107265	72.8402	0	C1203	44.44	A6802	0.4715
High	FAYTVKYVL	8	1	1	Q8N2K1		0	2.78688e+06	0	0.0003249	2.97761	2	1103.61	-0.449969	63.023	0	C1203	85.19	C1203	0.0353
High	KSFEAPIKL	9	1	1	Q8TCT9		0	1.68773e+07	0	0.000501	2.97316	2	1032.61	-0.993228	46.0705	0	C1203	81.48	C1203	0.0402
High	VKFGGQLLSF	2	1	1	Q08945		0	6.15864e+06	0	2.007e-05	2.96726	2	1095.62	-0.300228	69.262	0	C1203	51.43	B1503	0.1139
High	NTATIFHEL	35	1	1	Q9UHD2		0	3.06721e+08	0	0.003526	2.96555	2	1045.53	-0.372932	53.6634	0	C1203	74.07	A6802	0.0071
High	GHYLGEFSITY	15	1	1	P62841		0	3.46086e+07	0	1.467e-06	2.96209	2	1286.6	-0.609033	65.2821	0		0	B1503	1.6918
High	AASALIRTL	5	1	1	Q13535		0	3.45891e+06	0	1.178e-08	2.96056	2	915.562	-0.26543	48.3208	0	C1203	92.59	C1203	0.0771
High	WAYPRQVFI	12	1	1	Q9P2D0		0	1.84944e+07	0	0.001515	2.95937	2	1179.63	-0.476935	65.5465	0	C1203	81.48	C1203	0.0611
High	LQHPNIVGY	1	1	1	Q9BQI3		0	7.84447e+06	0	1.264e-05	2.95914	2	1040.55	0.0331197	45.4194	0	C1203	51.85	B1503	0.0036
High	GKIGTVmTF	18	1	1	P30046	M7(Oxidation)	0	8.85307e+06	0	0.0008256	2.95912	2	969.507	-0.44424	44.1636	0	C1203	40.74	B1503	0.013
High	RQQPPSTTTF	7	1	1	A3KN83		0	4.54185e+06	0	0.0001963	2.95708	2	1162.59	-0.122799	32.4982	0	C1203	37.14	B1503	0.0083
High	YAAPPSPPL	3	1	1	Q16610		0	7.1158e+06	0	5.097e-06	2.95592	2	912.483	-0.0556625	56.9974	0	C1203	88.89	C1203	0.008
High	RKLEAAEDIAY	9	1	1	P35232		0	2.02264e+07	0	2.132e-06	2.95437	2	1278.67	-0.310221	37.6223	0		0	B1503	0.652
High	NVDISAPKV	6	1	1	Q09666		0	4.4575e+06	0	6.174e-05	2.95102	2	942.525	-0.34717	45.0123	0	C1203	37.04	A6802	0.7329
High	EVFDKTYQF	11	1	1	Q96EU6		0	3.0167e+07	0	2.854e-05	2.94947	2	1176.56	-0.539835	55.0976	0	C1203	37.04	A6802	0.1371
High	RQFEFSVDSF	10	3	3	Q96IP4;Q5VWP2;Q8NEK8		0	9.27315e+06	0	3.094e-06	2.94892	2	1261.59	0.237246	65.9803	0	C1203	40	B1503	0.027
High	GKTSLITRF	9	2	2	P20340;Q9NRW1		0	1.02817e+07	0	2.503e-06	2.94583	2	1022.6	-0.238258	36.8985	0	C1203	37.04	B1503	0.1631
High	YLKDFFSNV	6	1	1	O95786		0	6.33462e+06	0	0.0001404	2.94451	2	1132.57	-0.0555897	64.8705	0	C1203	44.44	A6802	0.5346
High	ETIPSEIQVFV	13	1	1	Q15646		0	77596159	0	9.514e-12	2.93937	2	1261.67	-0.0755372	85.1294	0		0	A6802	0.339
High	KAIDIILRC	24	1	1	Q9Y6K5		0	5.66942e+07	0	0.003504	2.9378	2	1044.62	-0.711297	52.2409	0	C1203	48.15	C1203	1.8325
High	GQFLVKSGY	7	1	1	Q9NZI8		0	6.79233e+06	0	0.001027	2.93173	2	998.53	-0.209537	42.7774	0	C1203	40.74	B1503	0.0481
High	AKWNPTAGVAF	2	1	1	P19387		0	3.40944e+06	0	0.002992	2.93052	2	1161.6	-0.657353	56.9702	0		0	B1503	0.5535
High	VAFPTEIKV	13	1	1	Q9BPX7		0	2.25888e+07	0	0.00323	2.92873	2	1003.58	-0.353256	60.426	0	C1203	92.59	C1203	0.1755
High	AKFSLPVSL	8	1	1	Q12980		0	6.33132e+06	0	0.0006579	2.92868	2	961.572	-0.103438	67.4592	0	C1203	55.56	B1503	0.0876
High	KASGTLREY	20	1	1	Q02543		0	8.05752e+07	0	0.0006827	2.92751	2	1024.54	0.180273	20.1064	0	C1203	88.89	C1203	0.2953
High	FVIDPVRNL	8	1	1	P58107		0	1.16278e+07	0	0.0008748	2.92734	2	1072.61	-0.430488	63.9023	0	C1203	51.85	C1203	0.0069
High	RNYYRKIGY	11	1	1	Q9H9T3		0	2.15846e+07	0	0.0003146	2.92045	3	1232.65	-0.177169	25.1546	0	C1203	44.44	B1503	0.4643
High	ETFKDFPQm	48	2	2	P15170;Q8IYD1	M9(Oxidation)	0	1.45307e+07	0	0.0001818	2.91583	2	1158.51	-0.252942	43.9502	0	C1203	62.96	A6802	0.2512
High	YKFDFPVSY	4	1	1	Q9NXE4		0	4.82999e+06	0	0.0004469	2.9155	2	1165.56	0.404154	68.9089	0	C1203	55.56	B1503	0.0018
High	FKIPSNTTL	10	1	1	Q8TEY7		0	4.53344e+07	0	0.001874	2.91387	2	1020.57	-0.62353	53.2023	0	C1203	51.85	B1503	0.1014
High	YAYPYSYYY	8	1	1	Q96PV6		0	1.14096e+07	0	0.002542	2.90757	2	1252.52	0.308043	67.5531	0	C1203	88.89	C1203	0.0021
High	EIFNLKFAQA	7	1	1	P78347		0	8.44703e+06	0	0.0006755	2.90579	2	1180.64	-0.194339	66.1885	0	C1203	8.57	A6802	1.561
High	RLYFSQQTY	14	1	1	P33897		0	2.91259e+07	0	0.0018	2.90046	2	1205.59	-0.155225	46.2717	0	C1203	44.44	B1503	0.0148
High	SQFKGYFIF	16	1	1	Q9NY27		0	4.92147e+07	0	2.024e-07	2.89774	2	1136.58	-0.303775	70.9016	0	C1203	33.33	B1503	0.0094
High	LSFQEVREY	4	1	1	O00311		0	6.77376e+06	0	0.003109	2.89485	2	1170.58	0.43916	52.0516	0	C1203	81.48	C1203	0.2278
High	FKFGDQGGF	3	1	1	P49790		0	1.00794e+07	0	0.001177	2.89289	2	1002.47	-0.49422	53.9613	0	C1203	40.74	B1503	0.2126
High	SKKIDRHmY	14	1	1	P84098	M8(Oxidation)	0	2.61511e+07	0	0.0001003	2.89001	2	1193.61	-0.656876	15.9407	0	C1203	37.04	B1503	0.5279
High	TVFEHTFHV	18	1	1	P41250		0	1.07236e+08	0	0.0003378	2.88733	2	1116.55	-0.4485	45.907	0	C1203	44.44	A6802	0.0026
High	RKVLTEPEVRY	4	1	1	Q9NYY3		0	1.19147e+07	0	4.126e-08	2.88244	3	1389.78	-0.186861	32.567	0		0	B1503	1.2134
High	AAIEWIIEH	4	1	1	Q96N28		0	3.78788e+06	0	0.0009863	2.88181	2	1081.57	-0.268951	65.5735	0	C1203	55.56	C1203	2.0231
High	EAAAVFKTL	10	1	1	Q8IWZ6		0	2.18678e+07	0	0.0008035	2.87804	2	949.534	-1.06573	50.2754	0	C1203	85.19	A6802	0.1297
High	RKKPPMNSM	5	1	1	Q01844		0	4.35693e+06	0	0.0002052	2.87785	2	1088.57	-0.262125	17.3702	0	C1203	37.04	B1503	0.0375
High	SKNVSGISF	7	1	1	P49792		0	5.01746e+06	0	0.0007601	2.87605	2	938.494	-0.349765	41.7731	0	C1203	33.33	B1503	0.015
High	FQYPDTRYL	9	1	1	Q9NY61		0	1.03935e+07	0	5.724e-06	2.8687	2	1202.58	-0.235715	57.7321	0	C1203	55.56	C1203	0.0253
High	KQTQIFTTY	6	2	2	P34931;P08107		0	5.88899e+06	0	4.366e-05	2.86389	2	1129.59	-0.349503	43.8808	0	C1203	40.74	B1503	0.0027
High	YVTDVLYRV	15	1	1	Q96Q15		0	4.60706e+07	0	0.0002105	2.86034	2	1127.61	-0.339516	61.1969	0	C1203	44.44	A6802	0.008
High	YKKGKDSLY	8	2	2	P83881;Q969Q0		0	1.18258e+07	0	6.616e-05	2.85789	2	1101.59	-0.32484	18.5273	0	C1203	44.44	B1503	0.1869
High	SQYPFPVTLY	5	1	1	Q5R372		0	6.24874e+06	0	9.73e-05	2.85753	2	1214.61	-0.0352721	84.551	0	C1203	34.29	B1503	0.0041
High	AKVANASYY	4	1	1	O15042		0	4.15019e+06	0	0.0001555	2.85461	2	986.494	-0.188731	28.716	0	C1203	40.74	B1503	0.0678
High	EAAEVILRV	39	1	1	P78371		0	2.24783e+09	0	0.003555	2.85447	2	999.583	-0.0207216	54.9188	0	C1203	88.89	A6802	0.0081
High	KQLAEYRKY	1	1	1	O94955		0	945142	0	1.076e-09	2.85329	3	1198.66	-0.0844851	21.3546	0	C1203	40.74	B1503	0.0147
High	YTFESTIIY	11	1	1	Q4LDE5		0	1.90938e+07	0	0.0004839	2.84865	2	1136.55	-0.392936	75.0459	0	C1203	81.48	C1203	0.0071
High	AKAPFAAHGY	6	1	1	P49721		0	8.50352e+06	0	1.79e-07	2.84765	2	1032.53	-0.128544	29.0178	0	C1203	34.29	B1503	0.2206
High	TKVGPNATY	6	1	1	Q9Y5V3		0	3.55549e+06	0	0.003243	2.84638	2	950.494	-0.0779715	27.654	0	C1203	44.44	B1503	0.0179
High	KKYGVDLIRY	5	1	1	Q6UXN9		0	0	0	6.547e-06	2.84486	3	1254.72	-0.387279	39.6924	0	C1203	34.29	B1503	0.1609
High	FVFPGELLL	11	1	1	Q15758		0	7.98271e+07	0	3.902e-08	2.84274	2	1034.59	-0.532545	101.772	0	C1203	55.56	C1203	0.0124
High	LVASVRVPA	12	1	1	P42126		0	2.07393e+07	0	0.001381	2.84233	2	911.567	-0.426924	43.7917	0	C1203	11.11	A6802	0.6912
High	DVYDKVDYL	9	1	1	Q14254		0	7.14438e+06	0	0.0003741	2.8374	2	1129.54	-0.131094	58.355	0	C1203	48.15	A6802	0.0235
High	RKVYWFEKF	5	1	1	O60524		0	1.11798e+07	0	0.0006211	2.83623	3	1302.7	-0.395033	46.8798	0	C1203	29.63	B1503	0.4355
High	SAYARLIDY	9	1	1	P34897		0	3.61778e+07	0	5.426e-05	2.83552	2	1071.55	-0.150037	52.5394	0	C1203	81.48	C1203	0.0352
High	KQFRPPMGGY	2	1	1	Q9UKK9		0	4.79875e+06	0	0.0003198	2.83248	2	1180.59	-0.450904	36.3315	0	C1203	42.86	B1503	0.0437
High	KKIESSGVTY	6	1	1	Q9UKN8		0	3.89336e+06	0	6.473e-06	2.83234	2	1111.6	-0.428885	23.4914	0	C1203	31.43	B1503	0.0258
High	YKLLGGLAV	36	1	1	P23396		0	1.6161e+08	0	9.206e-07	2.8274	2	933.576	-0.448513	64.032	0	C1203	44.44	B1503	0.9261
High	YAKLIAEL	14	1	1	Q8NI27		0	4.42719e+07	0	0.0003455	2.82311	2	920.545	-0.163806	55.4027	0	C1203	93.33	C1203	1.1616
High	VALLRVTPF	3	1	1	Q8N4H5		0	7.52534e+06	0	5.645e-06	2.82238	2	1015.63	-0.36145	68.0141	0	C1203	74.07	C1203	0.6391
High	EVFPLAMNYL	4	3	3	P24385;P30279;P30281		0	6.03795e+06	0	2.488e-06	2.81891	2	1196.6	0.0309877	94.1017	0	C1203	40	A6802	0.0835
High	SAAGVLIKL	5	1	1	Q6P2E9		0	2.94675e+06	0	0.002829	2.8185	2	871.561	-0.0430375	55.8585	0	C1203	85.19	C1203	0.0772
High	AKIVPKISY	15	1	1	Q7Z417		0	6.21468e+07	0	0.001499	2.81678	2	1018.63	-1.57468	38.39	0	C1203	44.44	B1503	0.013
High	EVFNYIHNI	13	1	1	Q8N3P4		0	1.71373e+07	0	0.001765	2.81143	2	1148.57	-0.40542	60.278	0	C1203	37.04	A6802	0.0055
High	YQADIERMY	3	1	1	O95573		0	7.2561e+06	0	1.2e-05	2.81063	2	1188.54	-0.0802508	48.2566	0	C1203	51.85	B1503	0.0096
High	EIIDFFLGA	10	1	1	P15880		0	3.03114e+07	0	0.00372	2.80801	2	1024.53	-0.427319	100.352	0	C1203	7.41	A6802	0.047
High	YTIENPRHF	4	1	1	Q7KZF4		0	2.6411e+06	0	0.0004281	2.80674	2	1176.58	-0.227777	36.5175	0	C1203	74.07	C1203	0.0205
High	TTIEAIHGL	14	1	1	Q92905		0	3.93425e+07	0	0.001247	2.80663	2	954.525	-0.652044	49.8163	0	C1203	74.07	A6802	0.004
High	SVSPVVRVAV	20	1	1	P13639		0	4.55297e+08	0	0.0001569	2.80367	2	1012.61	-0.99847	49.3834	0	C1203	25.71	A6802	0.1278
High	HKIDKSHEF	4	1	1	Q9NWV8		0	2.3413e+06	0	3.705e-05	2.80172	2	1140.58	-0.350759	17.1752	0	C1203	37.04	B1503	0.0234
High	EAFIAWIHV	8	1	1	P21283		0	8.82868e+06	0	0.001638	2.80077	2	1085.58	-0.528008	78.5245	0	C1203	81.48	A6802	0.3114
High	EVSPVSFHQV	20	1	1	Q8N543		0	1.12341e+08	0	1.641e-10	2.80057	2	1128.57	-0.246744	48.2647	0	C1203	25.71	A6802	0.0332
High	SQYPFPVTL	14	1	1	Q5R372		0	3.45458e+07	0	0.0004115	2.79847	2	1051.55	-0.421803	80.7977	0	C1203	59.26	B1503	0.007
High	NVAEIVIHI	17	1	1	Q9BZD4		0	3.17419e+07	0	4.052e-05	2.79766	2	1007.59	-0.0851838	65.8158	0	C1203	44.44	A6802	0.0034
High	EVLDFITHL	38	1	1	Q13057		0	3.58744e+08	0	0.0001055	2.79714	2	1086.58	0.02219	82.0411	0	C1203	44.44	A6802	0.0081
High	IAVGHIYFF	6	1	1	Q9GZP9		0	5.80593e+06	0	0.002388	2.79693	2	1066.57	-0.107154	73.302	0	C1203	74.07	C1203	0.1782
High	SVYEGGVFFL	2	3	3	P51965;Q96LR5;Q969T4		0	1.67733e+06	0	5.777e-06	2.79639	2	1117.56	-0.579451	89.1569	0	C1203	37.14	A6802	0.1933
High	FLADIVQKL	1	1	1	Q9NZJ4		0	2.99252e+06	0	0.0006641	2.79424	2	1046.62	-0.420651	70.3628	0	C1203	51.85	C1203	0.0596
High	FAYPAIRYLL	11	1	1	P51398		0	1.2189e+07	0	2.682e-08	2.79203	2	1226.69	0.135057	77.9595	0	C1203	68.57	C1203	0.2327
High	KQMEQISQF	6	2	2	P37802;Q9UI15		0	8.56192e+06	0	0.0002454	2.78996	2	1138.56	-0.0820582	41.0209	0	C1203	37.04	B1503	0.0022
High	GQLPGLHEY	10	1	1	Q8TAT6		0	2.15348e+07	0	0.0001755	2.78728	2	1013.5	-0.168612	45.4461	0	C1203	48.15	B1503	0.0052
High	ITGPLIRIL	16	1	1	Q92616		0	3.30824e+07	0	0.0003811	2.78624	2	995.661	-0.235014	68.7427	0	C1203	81.48	C1203	0.7313
High	SQYGSQVGY	4	1	1	Q14147		0	3.73453e+06	0	0.0001434	2.78564	2	988.437	-0.249002	39.9225	0	C1203	48.15	B1503	0.0029
High	IKFFTGDVF	9	1	1	Q9UBE0		0	1.05262e+07	0	0.000429	2.78549	2	1073.57	-0.534352	71.988	0	C1203	37.04	B1503	0.0667
High	FAAFFSHIL	9	1	1	Q86XA9		0	1.8194e+07	0	4.399e-05	2.77889	2	1052.56	-0.32628	77.2061	0	C1203	81.48	C1203	0.1805
High	AKAGGFVVGY	3	1	1	Q9HAV4		0	2.85667e+06	0	0.002559	2.77883	2	968.52	-0.477483	46.518	0	C1203	40	B1503	0.1049
High	KLYQSIIGY	13	1	1	Q9NSV4		0	4.0798e+07	0	0.0005272	2.77446	2	1084.6	-0.614379	55.3437	0	C1203	48.15	B1503	0.0529
High	LAVPFCVNF	12	1	1	Q9Y266		0	1.01632e+07	0	0.0007729	2.77351	2	1009.52	-0.459485	92.998	0	C1203	77.78	C1203	1.4236
High	KQVKYFIHY	4	1	1	Q9UBU8		0	6.16581e+06	0	1.582e-07	2.77115	3	1225.67	-0.0719385	33.4571	0	C1203	40.74	B1503	0.012
High	AQFETKKLY	14	1	1	O60613		0	5.87416e+07	0	0.001644	2.77094	2	1127.61	-0.240129	33.8934	0	C1203	51.85	B1503	0.004
High	FAISILQQI	12	2	2	P60842;Q14240		0	3.78507e+07	0	0.0002471	2.76542	2	1032.61	-0.510682	89.5415	0	C1203	74.07	C1203	0.0765
High	KKIYLQDEF	3	1	1	Q8WU10		0	5.9743e+06	0	0.0009521	2.7649	2	1183.64	-0.104411	41.055	0	C1203	33.33	B1503	0.277
High	FVVDHVIKI	8	1	1	Q86UV5		0	2.24634e+07	0	0.003985	2.7643	2	1069.64	-0.743488	55.0108	0	C1203	44.44	A6802	0.0218
High	YAFPKAVSV	17	1	1	O15427		0	3.59052e+08	0	0.001104	2.76335	2	981.54	-0.724219	53.5518	0	C1203	92.59	C1203	0.0015
High	EAFHGKFYEA	15	1	1	Q13045		0	5.57286e+07	0	0.002865	2.76099	2	1198.55	-0.211477	35.5594	0	C1203	42.86	A6802	0.6977
High	NLYGSPREY	24	1	1	Q9NZM1		0	1.60884e+08	0	8.097e-05	2.75785	2	1098.52	-0.50038	37.0669	0	C1203	55.56	B1503	0.1427
High	AQEDAQRLY	2	1	1	P20073		0	552179	0	0.002638	2.75734	2	1093.53	-0.810693	32.3861	0	C1203	48.15	B1503	0.0418
High	YLYGQTTTY	6	1	1	P11388		0	1.1822e+07	0	1.069e-08	2.75698	2	1109.51	-0.789188	51.8377	0	C1203	51.85	B1503	0.0076
High	RQLYLSERY	5	1	1	Q5T953		0	7.49312e+06	0	0.001346	2.75467	2	1227.65	0.0387634	35.9638	0	C1203	37.04	B1503	0.033
High	KQFQKVITEY	6	1	1	Q7KZF4		0	6.56522e+06	0	0.003504	2.75378	2	1283.7	0.0461084	36.0394	0	C1203	37.14	B1503	0.0245
High	AQFPNGPQF	15	1	1	Q99595		0	1.56366e+07	0	0.000787	2.74501	2	1005.48	-0.275532	59.9547	0	C1203	44.44	B1503	0.0011
High	ESSPFVERLL	12	1	1	P14625		0	8.84489e+06	0	0.0003078	2.73708	2	1176.63	-0.266312	65.4335	0	C1203	57.14	A6802	1.2953
High	YAYDGKDYLA	13	17	17	P17693;P01892;P30447;P05534;P10316;P01889;P30460;Q04826;P30479;P30480;P30486;P18464;P30490;P30498;Q31610;P30499;P04222		0	4.99133e+07	0	0.0004562	2.72817	2	1178.54	0.18446	45.0462	0	C1203	45.71	A6802	0.4989
High	EVAGILEPVGL	9	1	1	O95229		0	1.04184e+07	0	1.509e-06	2.72784	2	1096.62	-0.552717	83.7168	0		0	A6802	0.3333
High	GQRKPATSY	14	1	1	P46779		0	1.41545e+08	0	0.001371	2.72775	2	1007.53	0.0017543	17.2523	0	C1203	37.04	B1503	0.0046
High	KKSDPVVSY	22	1	1	P13639		0	1.00179e+08	0	0.00225	2.72688	2	1022.55	-0.335567	24.7419	0	C1203	51.85	B1503	0.0042
High	TQmPDPKTF	5	1	1	Q9Y5V0	M3(Oxidation)	0	973472	0	0.00284	2.71578	2	1080.5	-0.204612	33.1277	0	C1203	48.15	B1503	0.009
High	SQFGTVTRF	20	1	1	Q9BYG3		0	2.421e+08	0	0.001411	2.71081	2	1042.53	-0.934316	46.6558	0	C1203	40.74	B1503	0.0015
High	SKFPTQISL	9	1	1	O15164		0	1.41205e+07	0	0.0006276	2.70962	2	1020.57	-0.62353	55.4495	0	C1203	51.85	B1503	0.061
High	FAFEEAIGY	2	1	1	Q96G03		0	5.05016e+06	0	0.001304	2.70712	2	1046.48	-0.0224992	77.4228	0	C1203	88.89	C1203	0.0291
High	RKIPVPANRY	4	1	1	Q9NRX1		0	3.51057e+07	0	0.0004248	2.70677	3	1213.72	-0.491742	26.3148	0	C1203	31.43	B1503	0.0568
High	GKVTGDTVY	7	1	1	Q6UX04		0	5.64046e+06	0	0.003212	2.70491	2	939.478	-0.350687	27.7254	0	C1203	40.74	B1503	0.0783
High	SIYGSYRNF	10	1	1	Q7L576		0	1.62524e+07	0	0.003375	2.70349	2	1106.53	-0.344008	46.8731	0	C1203	40.74	C1203	0.1909
High	VKFDAVIGY	6	1	1	Q8NBQ5		0	5.31249e+06	0	0.000328	2.68926	2	1011.55	-0.532511	59.3184	0	C1203	55.56	B1503	0.0097
High	GKFGITSAF	3	1	1	Q9H015		0	9.72809e+06	0	0.0004381	2.6886	2	927.493	-0.0382732	54.0852	0	C1203	37.04	B1503	0.0125
High	ALFRTIITY	8	2	2	P29992;P50148		0	8.99843e+06	0	0.001079	2.68822	2	1097.64	-0.0818077	65.5579	0	C1203	55.56	B1503	0.047
High	ETLFPSKIGV	7	2	2	Q9H8S9;Q7L9L4		0	1.03272e+07	0	0.0001954	2.68334	2	1090.61	-0.704476	61.6781	0	C1203	45.71	A6802	0.0371
High	ITVSIIKEL	16	1	1	Q8TED0		0	2.96464e+07	0	0.002352	2.68071	2	1015.64	-0.18343	65.1624	0	C1203	81.48	C1203	0.2229
High	YVFDGKPPQL	15	1	1	P39748		0	1.31318e+07	0	1.131e-05	2.67544	2	1163.61	-1.08055	58.9016	0	C1203	57.14	C1203	0.1729
High	YAAGVHSVL	8	1	1	O43299		0	1.83968e+07	0	0.003447	2.67511	2	916.488	-0.494809	40.692	0	C1203	88.89	C1203	0.008
High	RKVKNSQSF	2	1	1	P54920		0	1.6883e+06	0	9.443e-05	2.674	2	1093.61	-0.0527121	16.1251	0	C1203	29.63	B1503	0.0094
High	LLYESPERY	9	1	1	Q03518		0	8.59558e+06	0	0.003703	2.67059	2	1169.58	-0.482068	45.9181	0	C1203	48.15	B1503	0.1254
High	FSKDIFSVI	13	1	1	Q01650		0	1.57519e+08	0	0.001599	2.66396	2	1055.58	-0.25522	71.3178	0	C1203	70.37	C1203	0.11
High	RKIGDTSVSY	8	1	1	P20700		0	2.76546e+07	0	0.002998	2.66383	2	1125.59	-0.225741	30.2329	0	C1203	37.14	B1503	0.0209
High	EVAALIRSL	11	1	1	Q6P2Q9		0	2.56527e+07	0	0.0004283	2.6535	2	971.588	-0.349912	61.4515	0	C1203	48.15	A6802	0.0378
High	FLYPFPLAL	30	1	1	Q5BJD5		0	4.66043e+07	0	0.004019	2.65268	2	1080.61	-0.706224	104.487	0	C1203	59.26	C1203	0.0127
High	KKLPKGTVSF	3	1	1	O75534		0	3.66199e+06	0	0.000993	2.65199	2	1104.68	-0.729524	25.512	0	C1203	34.29	B1503	0.052
High	FQYDSTHGKF	5	1	1	P04406		0	4.81488e+06	0	1.124e-07	2.6516	3	1229.56	0.00494874	35.0223	0	C1203	45.71	B1503	0.0368
High	RAYQQSEAY	12	1	1	Q9P0W2		0	1.52875e+07	0	0.001428	2.65085	2	1115.51	0.121064	24.488	0	C1203	77.78	B1503	0.024
High	AKVKFEERY	6	1	1	P61353		0	3.96221e+07	0	2.183e-06	2.65001	2	1169.63	-0.0924354	24.7044	0	C1203	40.74	B1503	0.2739
High	SAFPFPVTV	13	1	1	Q96K37		0	3.17532e+07	0	8.464e-05	2.64665	2	964.514	-0.36799	85.8794	0	C1203	96.3	C1203	0.0042
High	IAFPTSISV	18	1	1	Q9UQ80		0	6.64647e+07	0	0.003377	2.64629	2	934.524	-0.31547	77.287	0	C1203	88.89	C1203	0.0073
High	YVTSILQSL	12	1	1	Q69YN4		0	7.92102e+06	0	0.0002107	2.63911	2	1023.57	-0.160504	79.4657	0	C1203	44.44	C1203	0.0597
High	KKFSDSVKSTF	8	1	1	Q9ULG6		0	1.47645e+07	0	0.00386	2.63129	3	1273.68	-0.108974	28.7021	0		0	B1503	0.4049
High	AKLKKFIAY	12	1	1	P33992		0	1.77665e+07	0	4.145e-06	2.63106	2	1081.68	-0.286619	31.1554	0	C1203	44.44	B1503	0.0278
High	GQYNKEDPTSF	3	1	1	Q15437		0	2.53989e+06	0	2.34e-06	2.62897	2	1285.57	-0.043322	37.2744	0		0	B1503	0.1347
High	FATPFLVVR	16	1	1	P15954		0	7.06361e+07	0	0.0008658	2.62652	2	1049.61	0.0229715	66.969	0	C1203	55.56	C1203	3.519
High	SKYFERHGY	6	1	1	O95786		0	1.34286e+07	0	5.512e-05	2.61911	2	1186.56	-0.402118	22.8544	0	C1203	40.74	B1503	0.0436
High	TVADFFIKA	3	1	1	Q709C8		0	3.45604e+06	0	0.002062	2.61903	2	1011.55	-0.0596914	64.6133	0	C1203	11.11	A6802	0.0196
High	ETFDFVHNV	11	1	1	Q96E29		0	2.3266e+07	0	0.0002369	2.61818	2	1107.51	-0.261663	59.7981	0	C1203	77.78	A6802	0.001
High	FSYVTPRAF	10	1	1	Q9Y4E8		0	4.2582e+06	0	0.002544	2.6169	2	1087.56	-0.4166	56.8148	0	C1203	74.07	C1203	0.0067
High	VALNFIISY	4	2	2	P50616;Q14106		0	3.96871e+07	0	4.441e-06	2.61355	2	1039.58	-0.321785	87.7243	0	C1203	85.19	C1203	0.0706
High	GQFSKPFSF	5	1	1	P35658		0	4.93115e+06	0	0.00212	2.60989	2	1044.51	-0.127517	56.7784	0	C1203	40.74	B1503	0.0042
High	FSFPGELLm	63	2	2	P43003;P48664	M9(Oxidation)	0	3.59804e+07	0	0.0006832	2.60976	2	1056.51	-0.210849	87.4368	0	C1203	77.78	C1203	0.0263
High	RKLDPPGGQFY	17	1	1	O95400		0	4.84053e+07	0	1.102e-05	2.60802	2	1277.66	-0.196885	40.4136	0		0	B1503	0.5857
High	GQFQKIVLY	8	1	1	P53675		0	9.12445e+06	0	4.032e-05	2.60496	2	1095.62	-0.616224	55.6494	0	C1203	48.15	B1503	0.0079
High	FAYGGWNYL	4	1	1	Q01650		0	4.58486e+06	0	0.001336	2.59969	2	1090.5	-0.0808744	81.0475	0	C1203	85.19	C1203	0.0035
High	TTIDVRTTF	8	1	1	Q8IY21		0	1.54524e+07	0	2.319e-05	2.59947	2	1053.56	-0.577981	51.4305	0	C1203	66.67	C1203	0.021
High	YVSEILEKV	7	1	1	P42704		0	9.10186e+06	0	1.484e-05	2.59267	2	1079.6	-0.251242	56.1827	0	C1203	48.15	A6802	0.0089
High	SKLYNNITF	2	1	1	Q9BT78		0	2.91988e+06	0	0.0001381	2.58876	2	1099.58	0.0303471	52.7626	0	C1203	37.04	B1503	0.0578
High	YIYIRGEFY	3	1	1	P49821		0	2.53335e+06	0	0.0007651	2.58765	2	1223.61	-0.603994	59.7583	0	C1203	44.44	C1203	0.1961
High	EVAELFQRL	23	1	1	Q4V328		0	8.88698e+07	0	0.0003861	2.58644	2	1104.6	-0.383471	64.9427	0	C1203	44.44	A6802	0.0205
High	KHQEHILRF	23	1	1	Q13263		0	5.05752e+07	0	0.0039	2.58207	3	1207.67	0.106845	24.2546	0	C1203	40.74	B1503	0.1374
High	IIVDIFHGL	9	1	1	Q9Y4E8		0	6.10027e+06	0	1.954e-06	2.57804	2	1026.6	-0.0966006	79.3634	0	C1203	40.74	A6802	0.0896
High	SVIGGNLTGIFI	3	1	1	Q9BXL6		0	4.60109e+06	0	0.003754	2.57414	2	1190.68	0.217485	92.0212	0		0	A6802	1.8764
High	DTFDKNYKA	7	1	1	Q9BZG1		0	1.23855e+07	0	0.0005822	2.5732	2	1101.52	-0.0976899	26.0547	0	C1203	37.04	A6802	0.0393
High	AAYTEIRAL	6	1	1	Q13535		0	1.03574e+07	0	0.0009087	2.57046	2	1007.55	-0.375126	47.6201	0	C1203	88.89	C1203	0.0136
High	YKIDEDGKKF	3	1	1	O75821		0	3.0851e+06	0	0.002456	2.56915	3	1242.64	-0.288284	28.2079	0	C1203	40	B1503	0.5736
High	FAFPLHVDY	14	1	1	Q8TDY4		0	2.44733e+07	0	9.081e-06	2.5623	2	1108.55	-0.266352	72.7169	0	C1203	92.59	C1203	0.0261
High	YAFPKSITV	28	1	1	P53985		0	3.29009e+08	0	0.0001257	2.55581	2	1025.57	-0.658887	58.0369	0	C1203	96.3	C1203	0.0014
High	RHFSKSDSF	3	1	1	Q4FZB7		0	1.07739e+06	0	0.003243	2.55431	2	1110.53	-0.622476	19.6077	0	C1203	37.04	B1503	0.099
High	QKFLQGLVY	11	1	1	Q5J8M3		0	3.60734e+07	0	1.958e-05	2.55118	2	1095.62	-0.504807	61.1093	0	C1203	48.15	B1503	0.0525
High	FAYPNRPDVL	9	1	1	Q03518		0	1.98697e+07	0	0.002037	2.55111	2	1191.62	-0.479514	55.4314	0	C1203	80	C1203	0.1481
High	YAFPKSITVF	10	1	1	P53985		0	24008735	0	1.538e-06	2.54845	2	1172.63	-0.523852	70.3124	0	C1203	77.14	C1203	0.0324
High	DVAEFLYQV	12	1	1	Q9Y5M8		0	1.8802e+07	0	0.002542	2.54216	2	1083.54	-0.0453792	88.8605	0	C1203	44.44	A6802	0.0045
High	YGYRQSVTY	8	1	1	P08174		0	1.00942e+07	0	0.00413	2.53404	2	1136.54	-0.488042	37.4876	0	C1203	51.85	C1203	0.0393
High	EVFPDQFIHL	36	1	1	P07686		0	2.07034e+08	0	0.0004148	2.52833	2	1244.63	-0.508269	78.685	0	C1203	40	A6802	0.0767
High	RQFPTAFEF	15	1	1	Q13614		0	1.7253e+07	0	0.000642	2.52421	2	1142.56	0.056522	64.2535	0	C1203	44.44	B1503	0.0057
High	FASTILHLV	15	1	1	P61803		0	2.84117e+07	0	4.29e-05	2.52073	2	1000.58	-0.00313302	67.5436	0	C1203	81.48	A6802	0.045
High	RQLEDILSTY	10	1	1	P40222		0	1.65368e+07	0	3.906e-05	2.51651	2	1237.64	-0.0580032	61.4306	0	C1203	28.57	B1503	0.0124
High	RQYPEVIKY	3	1	1	Q9UIF8		0	1.00116e+07	0	4.004e-05	2.51587	2	1195.65	-0.094606	38.8907	0	C1203	55.56	B1503	0.0008
High	RKLTPGEVY	4	1	1	Q15818		0	5.69093e+06	0	0.001594	2.51191	2	1062.59	-0.321507	29.1672	0	C1203	40.74	B1503	0.0182
High	ETFNDFVRL	8	1	1	O43913		0	1.60186e+07	0	0.0005869	2.50226	2	1140.57	-0.359941	67.564	0	C1203	74.07	A6802	0.019
High	DVIRHYGEHV	4	1	1	Q9BQG0		0	3.15871e+06	0	3.73e-05	2.5009	3	1224.61	-0.621075	28.1411	0	C1203	25.71	A6802	1.0681
High	RVFPYSVFY	35	1	1	O15118		0	2.17141e+08	0	1.479e-05	2.49771	2	1177.6	-0.128961	69.4988	0	C1203	51.85	C1203	0.0153
High	AKYPIKQSL	8	1	1	P21283		0	1.66987e+07	0	0.000724	2.49604	2	1047.62	-0.644458	30.3758	0	C1203	51.85	B1503	0.0819
High	YmIDPSGVSY	21	1	1	P25788	M2(Oxidation)	0	1.47542e+07	0	0.003051	2.49297	2	1147.5	-0.770895	61.5709	0	C1203	48.57	B1503	0.0334
High	ASYPELRLF	12	1	1	O75718		0	4.72688e+07	0	0.0001416	2.48079	2	1095.58	-0.390622	68.7019	0	C1203	77.78	C1203	0.1506
High	YGYEHILTL	7	1	1	Q96AX1		0	1.29351e+07	0	0.003354	2.4728	2	1108.57	-0.369098	63.7675	0	C1203	59.26	C1203	0.0034
High	SSAPTARVF	16	1	1	O94906		0	4.28457e+07	0	1.589e-05	2.46504	2	935.494	-0.257624	37.235	0	C1203	77.78	C1203	0.1048
High	HQQPPSQQY	2	1	1	Q15532		0	920835	0	1.623e-07	2.45893	2	1112.51	0.15394	22.4522	0	C1203	44.44	B1503	0.0037
High	SRISLPLPNF	6	1	1	P08670		0	3.41555e+06	0	0.004068	2.45683	2	1143.65	-0.0840834	73.0338	0	C1203	28.57	B1503	0.7212
High	ETAAIFHYL	7	1	1	Q13535		0	4.91419e+06	0	0.001992	2.4547	2	1064.54	0.0319331	66.5946	0	C1203	70.37	A6802	0.0029
High	YTSDLHFQV	8	1	1	Q1KMD3		0	1.76032e+07	0	0.002804	2.45342	2	1109.53	-0.705776	54.7686	0	C1203	77.78	A6802	0.0061
High	MVVDIVQEL	14	1	1	O00764		0	7.47709e+07	0	0.0005601	2.43515	2	1045.56	-0.242347	81.8118	0	C1203	48.15	A6802	0.0082
High	KLYEFVHSF	3	1	1	Q8N4W6		0	2.30329e+06	0	0.003798	2.4325	2	1169.6	-0.587466	51.8447	0	C1203	40.74	B1503	0.0203
High	NSYVSPRIL	12	1	1	Q9H992		0	2.229e+07	0	0.002236	2.42999	2	1048.58	-0.292425	49.2267	0	C1203	77.78	C1203	0.2514
High	IAIPFLIKL	13	1	1	Q8N2K0		0	3.77526e+07	0	2.668e-08	2.41631	2	1027.69	-0.254543	87.9118	0	C1203	85.19	C1203	0.0381
High	RLFGTTVTF	16	1	1	Q15904		0	1.08949e+08	0	0.003974	2.40545	2	1041.57	-0.585794	61.3372	0	C1203	44.44	B1503	0.0118
High	SAMPTVRSF	9	1	1	Q03518		0	4.87607e+07	0	0.00354	2.40027	2	995.498	-0.387889	45.8394	0	C1203	81.48	C1203	0.0052
High	RKFPADYIKY	6	1	1	Q7Z333		0	8.19366e+06	0	4.609e-05	2.39401	3	1300.7	-0.28398	40.9386	0	C1203	40	B1503	0.0593
High	FAFPDEFVF	4	2	2	O14908;Q8TF65		0	7.12489e+06	0	6.666e-05	2.37881	2	1118.52	-0.041655	99.1765	0	C1203	85.19	C1203	0.0942
High	LILPGYIDF	8	1	1	P12268		0	1.47811e+07	0	2.222e-06	2.36187	2	1050.59	-0.317708	94.1909	0	C1203	40.74	B1503	1.1812
High	DIFPIVIHV	12	1	1	Q9BXL6		0	4.75949e+07	0	0.001841	2.35082	2	1052.61	-0.46587	85.8269	0	C1203	55.56	A6802	0.0096
High	DVANKIGII	5	1	1	P62750		0	5.65355e+06	0	5.599e-06	2.32787	2	942.562	-0.0372262	55.5789	0	C1203	37.04	A6802	0.8003
High	RKAASLKSNY	1	1	1	P36578		0	2.23952e+06	0	1.598e-05	2.31782	2	1137.64	-0.341709	17.3936	0	C1203	28.57	B1503	0.5388
High	RAIDFSPYL	10	1	1	P17676		0	1.65154e+07	0	0.001821	2.30767	2	1081.57	0.0788875	64.6429	0	C1203	77.78	C1203	0.0061
High	QAFPLIIKL	12	1	1	Q14CZ7		0	3.74049e+07	0	0.0005703	2.30518	2	1042.67	-0.0385038	77.45	0	C1203	92.59	C1203	0.0287
High	YQKQPKIGY	3	1	1	Q68E01		0	4.01529e+06	0	4.766e-05	2.27115	2	1124.61	-0.525313	27.5302	0	C1203	44.44	B1503	0.0059
High	EVIDFSHGL	24	3	3	Q96GS6;Q5VST6;Q6PCB6		0	2.43065e+08	0	0.003337	2.26837	2	1016.5	-0.753973	61.3936	0	C1203	40.74	A6802	0.0026
High	NTIPFIIRY	12	1	1	Q8N5C6		0	7.47503e+07	0	0.0005702	2.24588	2	1136.65	-0.540026	69.1498	0	C1203	81.48	C1203	0.1253
High	EIAEAYLGYPV	12	1	1	P08107		0	1.9907e+07	0	0.0004154	2.24081	2	1224.61	-0.0405661	76.4389	0		0	A6802	1.2683
High	HVIDLDDATFL	8	1	1	Q8N8R7		0	2.69482e+07	0	0.002738	2.2375	2	1258.63	-0.0445285	74.9659	0		0	A6802	1.319
High	YASDVQLIL	8	1	1	Q8NHQ8		0	5.26322e+07	0	0.0007032	2.23112	2	1021.56	-0.444873	75.8115	0	C1203	88.89	C1203	0.0293
High	IALPSLRIL	14	1	1	P00403		0	8.21971e+07	0	0.0004105	2.14823	2	995.661	-0.418917	75.7726	0	C1203	85.19	C1203	0.1144
High	YAKDDPLEF	6	1	1	P06756		0	1.05181e+07	0	0.00168	2.0879	2	1097.51	-0.287252	53.2428	0	C1203	85.19	C1203	0.028
High	ETYPDPVRV	27	1	1	P49588		0	5.03116e+08	0	0.0004289	1.91714	2	1075.54	-0.429426	46.9525	0	C1203	85.19	A6802	0.0048
High	SSVPGVRLL	11	1	1	P08670		0	2.33664e+07	0	0.001656	1.40403	2	927.562	-0.3936	53.5955	0	C1203	81.48	C1203	0.0791
High	GKVFATTGY	1	2	2	Q14957;O15399		0	1714247	0.001	0.005481	3.13681	2	943.488	-0.58372	37.5172	0	C1203	37.04	B1503	0.1564
High	SKYPASSSVF	4	1	1	P09629		0	4.85118e+06	0.001	0.004398	2.95637	2	1072.53	-0.615613	40.7018	0	C1203	40	B1503	0.0308
High	GKAPLNVQF	3	1	1	O75369		0	13754191	0.001	0.004498	2.9433	2	973.546	-0.223942	49.8343	0	C1203	44.44	B1503	0.0364
High	FKFGKELTF	5	1	1	Q5T447		0	7.68081e+06	0.001	0.005273	2.86915	2	1116.61	-0.48122	55.3073	0	C1203	48.15	B1503	0.0171
High	RKFYKGKKY	14	1	1	P42766		0	4.54993e+07	0.001	0.004702	2.85571	3	1217.72	0.196289	15.9161	0	C1203	44.44	B1503	0.0393
High	VAINHIVDF	11	1	1	P78346		0	1.14793e+07	0.001	0.005645	2.81446	2	1027.56	-0.331861	60.7604	0	C1203	77.78	C1203	0.1101
High	GKAPGAEEY	5	1	1	P09543		0	5.46024e+06	0.001	0.004859	2.80416	2	921.431	-0.220774	22.4694	0	C1203	51.85	B1503	0.0978
High	DVINVFHHL	6	1	1	Q9UK58		0	8.95685e+06	0.001	0.004809	2.80253	2	1093.58	-0.256424	57.563	0	C1203	37.04	A6802	0.0237
High	FKSPAASSF	5	1	1	O15504		0	4.1039e+06	0.001	0.005439	2.79428	2	941.472	-0.374548	40.1778	0	C1203	44.44	B1503	0.0106
High	KTPDFILQV	12	1	1	Q9Y2V0		0	2.16096e+07	0.001	0.005246	2.76022	2	1060.6	-0.311282	64.738	0	C1203	77.78	A6802	0.1542
High	DVSKIFQVV	2	1	1	Q5TF58		0	8.3193e+06	0.001	0.005939	2.7431	2	1034.59	-0.0589664	70.8319	0	C1203	44.44	A6802	0.1308
High	GKFQDNFEF	11	2	2	Q15691;Q9UPY8		0	1.58248e+07	0.001	0.00595	2.70742	2	1131.51	-0.264951	55.8886	0	C1203	37.04	B1503	0.0536
High	RQFPVTVHF	9	1	1	Q8IY37		0	2.40823e+07	0.001	0.005872	2.67873	2	1130.61	-0.916878	50.1275	0	C1203	44.44	B1503	0.0015
High	SMGPVRVAF	7	1	1	P29279		0	1.68673e+07	0.001	0.004438	2.67787	2	963.508	-0.260715	53.915	0	C1203	40.74	B1503	0.0604
High	HAAHIISEL	14	1	1	Q96I24		0	3.11183e+07	0.001	0.005164	2.65564	2	990.536	-0.381393	35.7648	0	C1203	85.19	C1203	0.029
High	KLFIGGLSF	12	4	4	Q32P51;P09651;P22626;P51991		0	3.34731e+07	0.001	0.0052	2.6311	2	981.575	-1.55602	74.682	0	C1203	37.04	B1503	0.0119
High	DTTYINHVV	24	1	1	Q9UBR2		0	2.56336e+08	0.001	0.00521	2.60986	2	1061.53	-0.73769	47.8162	0	C1203	70.37	A6802	0.0533
High	IIIVVSNPV	3	1	1	P07195		0	2.52455e+06	0.001	0.005599	2.60804	2	953.603	-0.348749	71.1213	0	C1203	37.04	A6802	1.0402
High	AQHLFIQTF	2	1	1	Q14684		0	2.96347e+06	0.001	0.005516	2.60581	2	1104.58	-0.133632	60.4777	0	C1203	40.74	B1503	0.0085
High	DTSPVFQRL	7	1	1	Q9NU22		0	8.91891e+06	0.001	0.006022	2.60065	2	1062.56	-0.663301	53.6759	0	C1203	77.78	A6802	0.0678
High	SAIDRIFTL	10	1	1	Q86TU7		0	2.83758e+07	0.001	0.005925	2.5705	2	1035.58	-0.305035	71.0241	0	C1203	85.19	C1203	0.0032
High	ESYQKVIELF	9	1	1	Q96KB5		0	1.30828e+07	0.001	0.005961	2.54509	2	1255.66	-0.788363	69.9395	0	C1203	54.29	C1203	4.7188
High	RKIQEESLRTY	1	2	2	Q99613;B5ME19		0	1.55876e+06	0.001	0.005249	2.51315	3	1422.77	0.0797168	26.13	0		0	B1503	0.4727
High	TKYLFQVTF	2	1	1	Q9NQX4		0	1.82919e+06	0.001	0.004744	2.49059	2	1146.62	-0.18583	71.1609	0	C1203	40.74	B1503	0.1321
High	GKEKLPRYY	16	1	1	P62280		0	3.42288e+07	0.001	0.005546	2.47103	2	1153.64	-0.67923	25.4132	0	C1203	44.44	B1503	0.9198
High	EAIDFIDSI	4	1	1	P28562		0	1.04752e+07	0.001	0.005916	2.46054	2	1022.5	-0.223458	85.1916	0	C1203	74.07	A6802	0.0194
High	ELAEIVFKV	8	1	1	Q9Y2R5		0	9.77956e+06	0.001	0.004929	2.44827	2	1047.61	-0.197912	69.9546	0	C1203	48.15	A6802	0.0159
High	HKYLLVEFY	4	1	1	P07237		0	4.83793e+06	0.001	0.005906	2.42206	2	1211.65	-0.419231	60.328	0	C1203	44.44	B1503	0.4985
High	LPVDIRQYL	3	1	1	P52630		0	3.1684e+06	0.001	0.005249	2.35899	2	1116.64	-0.154472	73.1528	0	C1203	40.74	C1203	0.9833
High	ETFAFQAEI	12	5	5	Q58FF8;Q58FF7;Q14568;P07900;P08238		0	5.39188e+07	0.001	0.004304	2.31688	2	1055.5	-0.586944	74.9236	0	C1203	66.67	A6802	0.0102
High	YKLDKQHTF	5	1	1	P55884		0	3.83789e+06	0.001	0.005986	2.3077	2	1179.62	-0.260471	26.806	0	C1203	40.74	B1503	0.0147
High	YALPHAIL	11	3	3	Q562R1;P60709;P63261		0	15831498	0.001	0.00573	2.29087	2	897.519	0.184373	58.8368	0	C1203	83.33	C1203	0.6922
High	EVFEKATFI	13	1	1	P19338		0	3.91893e+07	0.001	0.00597	2.24963	2	1083.57	-0.291958	58.137	0	C1203	37.04	A6802	0.0158
High	GQYPTQPTY	21	1	1	Q15038		0	2.29848e+08	0.001	0.004945	2.22299	2	1054.48	-0.767584	43.8656	0	C1203	51.85	B1503	0.0016
High	STFGYVHGV	9	1	1	P38606		0	1.6797e+07	0.001	0.005533	2.21515	2	966.468	-0.418436	45.159	0	C1203	77.78	A6802	0.0026
High	KALSRLISF	13	1	1	Q8N8L2		0	1.11849e+08	0.001	0.005529	2.17977	2	1034.64	-0.66104	53.9809	0	C1203	74.07	C1203	0.0962
High	YLKEFIHIL	8	1	1	Q9NZ32		0	8.95536e+06	0.001	0.005885	2.06769	2	1175.68	-0.14017	62.8206	0	C1203	48.15	C1203	0.204
High	VKVVPTVY	8	1	1	Q9Y282		0	9.08081e+06	0.001	0.005753	2.0286	2	904.55	-0.0473194	45.8004	0	C1203	36.67	B1503	0.4625
High	HTVGFILQL	16	1	1	Q5SRE5		0	8.29392e+07	0.001	0.005849	1.75408	2	1027.59	-0.453607	72.1491	0	C1203	77.78	A6802	0.0263
High	RQYDKFLTHF	3	1	1	Q7Z6M2		0	6.22619e+06	0.002	0.007009	3.53976	3	1354.69	-0.383383	42.5609	0	C1203	37.14	B1503	0.0118
High	GKAFTHYSTY	2	1	1	Q14592		0	2.02202e+06	0.002	0.009318	3.1305	2	1174.55	-0.294186	28.251	0	C1203	28.57	B1503	0.5361
High	KAFPKAYLL	18	1	1	Q66K89		0	6.34093e+07	0.002	0.008873	3.12094	2	1050.63	-0.678227	45.7898	0	C1203	85.19	C1203	0.0085
High	GQRKGAGSVF	13	1	1	P62917		0	3.08547e+07	0.002	0.007872	3.05469	2	1006.54	-0.138188	21.1764	0	C1203	42.86	B1503	0.0549
High	FTSQVIRNL	1	1	1	Q14204		0	2.16814e+06	0.002	0.006754	3.0477	2	1077.6	-1.14315	50.2691	0	C1203	81.48	C1203	0.1727
High	RKKQSDVMRF	2	1	1	P61313		0	4.06467e+06	0.002	0.006268	3.01109	3	1294.71	0.171078	20.4633	0	C1203	28.57	B1503	0.3282
High	TKISTHVSF	9	1	1	Q8TEY7		0	1.49795e+07	0.002	0.006373	2.99568	2	1019.55	-1.13914	34.8269	0	C1203	37.04	B1503	0.0192
High	SVVELVNKL	11	1	1	Q9BQE5		0	1.5571e+07	0.002	0.006385	2.99289	2	1000.6	-0.695938	59.2589	0	C1203	44.44	A6802	0.0721
High	KAYHEQLTV	7	1	1	Q9BQE3		0	1.10847e+07	0.002	0.009393	2.92997	2	1088.57	-0.539904	28.2152	0	C1203	85.19	C1203	0.0888
High	AKQDVVLNY	4	1	1	Q15029		0	6.11663e+06	0.002	0.00663	2.90766	2	1049.56	-1.00067	41.9218	0	C1203	51.85	B1503	0.0235
High	FSMYKPITY	2	1	1	Q68CL5		0	2.31212e+06	0.002	0.007322	2.90542	2	1149.56	-0.684422	57.4464	0	C1203	81.48	C1203	0.0087
High	RSTKTGTAY	3	1	1	P17844		0	4.81641e+06	0.002	0.00668	2.90312	2	984.511	-0.123426	16.0733	0	C1203	66.67	B1503	0.2802
High	SKLGPGEKY	2	2	2	P53805;Q9UKA8		0	3.85409e+06	0.002	0.008054	2.89961	2	978.525	-0.386553	21.9855	0	C1203	40.74	B1503	0.1059
High	FKVGDPEEY	7	1	1	Q8WYP3		0	1.07225e+07	0.002	0.006596	2.89112	2	1083.5	-0.493221	45.62	0	C1203	51.85	B1503	0.3282
High	mASALVHIL	12	1	1	Q5VWQ8	M1(Oxidation)	0	7.32272e+06	0.002	0.009893	2.8909	2	970.539	-0.206423	57.103	0	C1203	81.48	C1203	0.1674
High	AQHLTVSGF	3	1	1	Q96GX5		0	4.42167e+06	0.002	0.006724	2.88644	2	959.494	-0.495205	44.2484	0	C1203	37.04	B1503	0.0138
High	GKVRTDITY	20	1	1	P62701		0	1.47919e+08	0.002	0.006476	2.8835	2	1052.57	-0.451897	28.6413	0	C1203	44.44	B1503	0.128
High	QAIDLVYIDF	13	1	1	Q8N0X4		0	4.3865e+07	0.002	0.006376	2.88006	2	1196.62	-2.56096	70.2766	0	C1203	62.86	C1203	5.2821
High	SQIRQSTAY	1	1	1	O43150		0	848008	0.002	0.006807	2.86568	2	1053.53	-0.439806	24.7255	0	C1203	37.04	B1503	0.0042
High	STSDIITRI	18	2	2	P49585;Q9Y5K3		0	4.03425e+08	0.002	0.006213	2.85823	2	1005.56	-0.544873	49.8943	0	C1203	70.37	A6802	0.0093
High	HTINGHNAEV	7	1	1	P22626		0	2.1957e+07	0.002	0.006445	2.85684	2	1091.52	-0.229673	20.2337	0	C1203	45.71	A6802	0.0866
High	ASGLIHRV	16	1	1	Q8N6L1		0	5.81873e+07	0.002	0.007391	2.85497	2	852.505	0.00138599	37.7807	0	C1203	70	A6802	14.5201
High	RKYHQRPTF	3	1	1	O75369		0	3.42812e+06	0.002	0.006582	2.84684	3	1232.66	-0.168255	18.0447	0	C1203	37.04	B1503	0.0134
High	GKNPDEVSY	7	1	1	O95391		0	1.10576e+07	0.002	0.006081	2.84354	2	1008.46	-0.17846	27.4231	0	C1203	48.15	B1503	0.077
High	GKSSVIQVF	9	1	1	Q8WVC6		0	1.46694e+07	0.002	0.00625	2.84138	2	964.545	-0.949271	50.3875	0	C1203	44.44	B1503	0.0291
High	SAIPHPLIm	19	1	1	P61201	M9(Oxidation)	0	27651469	0.002	0.006513	2.82361	2	994.538	-0.815146	50.6668	0	C1203	81.48	C1203	0.0063
High	IAYSRPVYF	1	2	2	Q96RV3;Q9H6A9		0	3.34163e+06	0.002	0.008577	2.8217	2	1115.59	-0.00429818	53.1668	0	C1203	81.48	C1203	0.0034
High	RKKPTTEGF	6	1	1	Q03111		0	8.74244e+06	0.002	0.009267	2.82166	2	1063.59	-1.14411	17.874	0	C1203	37.04	B1503	0.0347
High	RKPDQVFQSY	8	1	1	Q96K76		0	5.39693e+06	0.002	0.008146	2.81159	2	1267.64	-0.585171	33.8995	0	C1203	40	B1503	0.2794
High	KKIDASQTEF	5	1	1	O94979		0	6.53577e+06	0.002	0.009789	2.81071	2	1166.61	-0.174208	27.3937	0	C1203	34.29	B1503	0.0351
High	FKIDVGFVY	4	1	1	Q9NZM1		0	3.35539e+06	0.002	0.006722	2.80729	2	1087.58	-0.0922973	73.3377	0	C1203	48.15	B1503	0.0366
High	VKVIDRILY	8	1	1	O75533		0	7.52769e+06	0.002	0.007669	2.80309	2	1118.69	-0.515555	49.1509	0	C1203	44.44	B1503	0.1472
High	AAFAYTVKY	13	1	1	Q8N2K1		0	1.45165e+08	0.002	0.007178	2.80297	2	1033.53	-1.42252	50.5907	0	C1203	85.19	C1203	0.0287
High	GKIIKPLQY	11	1	1	Q13823		0	1.36209e+07	0.002	0.009104	2.80141	2	1059.66	-0.534252	36.3816	0	C1203	44.44	B1503	0.1046
High	YKVDLESKL	1	1	1	Q96NC0		0	1.88452e+06	0.002	0.006722	2.79952	2	1094.61	-0.280449	43.8967	0	C1203	44.44	B1503	1.0015
High	KKANITFEY	11	1	1	O15372		0	3.91923e+07	0.002	0.006497	2.78281	2	1113.59	-0.220701	35.6402	0	C1203	44.44	B1503	0.0366
High	GKGKFGNVY	7	3	3	O14965;Q96GD4;Q9UQB9		0	1.10725e+07	0.002	0.006166	2.77676	2	969.515	-0.477758	24.0866	0	C1203	40.74	B1503	0.0932
High	TLFGSVIRY	9	1	1	P09871		0	6.27191e+06	0.002	0.006554	2.77022	2	1055.59	-0.707868	63.6237	0	C1203	51.85	B1503	0.1246
High	SVADVVRFI	5	1	1	Q9UHJ3		0	4.52494e+06	0.002	0.006311	2.76691	2	1005.57	-0.313225	70.3554	0	C1203	44.44	A6802	0.0166
High	RKPDEDMKLY	2	1	1	P52948		0	4.581e+06	0.002	0.006362	2.75963	3	1294.65	0.0231579	29.9312	0	C1203	34.29	B1503	1.1892
High	MPAFIFEHI	11	1	1	O00560		0	2.27706e+07	0.002	0.006368	2.755	2	1104.55	-0.429569	74.7353	0	C1203	33.33	A6802	0.7009
High	GKLHPSSSL	1	1	1	A5PLN9		0	2.03443e+06	0.002	0.009212	2.74403	2	925.51	-0.408506	21.8687	0	C1203	37.04	B1503	0.7917
High	LQRATGISF	3	1	1	Q15393		0	4.90731e+06	0.002	0.006668	2.72015	2	992.552	0.0145713	44.6704	0	C1203	33.33	B1503	0.004
High	GQVTFLHVF	6	1	1	Q9BW60		0	2.96591e+06	0.002	0.007292	2.71786	2	1047.56	-0.280702	68.605	0	C1203	33.33	B1503	0.0616
High	DTFYVQVLV	14	1	1	Q5BJD5		0	2.11863e+07	0.002	0.006174	2.71507	2	1083.57	-0.611467	90.5618	0	C1203	74.07	A6802	0.0353
High	YKIDPSTL	6	1	1	O15294		0	6.97732e+06	0.002	0.007133	2.71227	2	936.503	-0.382063	48.6652	0	C1203	43.33	B1503	1.6411
High	KKIEFGVVY	6	1	1	P29218		0	1.35694e+07	0.002	0.006362	2.70805	2	1082.62	0.0535897	45.0583	0	C1203	48.15	B1503	0.0033
High	FAFLRQEL	3	1	1	Q16654		0	4.79776e+06	0.002	0.009828	2.70542	2	1023.56	-0.058533	61.8826	0	C1203	93.33	C1203	0.7521
High	LKSVNELIY	8	1	1	P18124		0	5.41327e+07	0.002	0.007591	2.70231	2	1078.61	-0.354251	53.9813	0	C1203	44.44	B1503	0.4351
High	RQLGSLSKY	4	1	1	Q9Y6W5		0	7.11322e+06	0.002	0.006405	2.70218	2	1051.59	-0.557741	27.7241	0	C1203	40.74	B1503	0.0055
High	HVGDIIKEV	11	2	2	Q14168;Q9NZW5		0	3.31796e+07	0.002	0.008881	2.69467	2	1009.57	-0.409046	42.2981	0	C1203	51.85	A6802	0.0853
High	GQYSTGKTSF	5	1	1	Q9NZN4		0	4.40768e+06	0.002	0.006373	2.69383	2	1075.5	-0.521512	30.356	0	C1203	34.29	B1503	0.0117
High	TKYLENQAF	1	1	1	Q99661		0	4.79129e+06	0.002	0.007019	2.69355	2	1113.56	-0.208992	43.0022	0	C1203	33.33	B1503	0.0182
High	KHQPHKVTQY	4	2	2	P83881;Q969Q0		0	4.45268e+06	0.002	0.008213	2.68716	3	1265.68	0.079928	15.9391	0	C1203	31.43	B1503	0.2984
High	KKIELDVKY	4	1	1	Q9UHR4		0	3.7759e+06	0.002	0.006211	2.68509	2	1135.67	-0.44277	33.8835	0	C1203	44.44	B1503	0.0326
High	ALPEFTSIF	2	1	1	Q13887		0	4.6439e+06	0.002	0.006697	2.68424	2	1024.54	0.0590301	90.0119	0	C1203	37.04	B1503	0.4803
High	AQAASQHVF	4	1	1	Q9NQT4		0	4.49082e+06	0.002	0.00631	2.67865	2	958.474	-0.417177	28.7498	0	C1203	40.74	B1503	0.0041
High	AAISHGRVF	9	1	1	Q9NRX2		0	1.16079e+07	0.002	0.007485	2.6715	2	957.526	-0.429951	28.2965	0	C1203	81.48	B1503	0.051
High	GKVKLVVRY	11	1	1	Q9NUP9		0	2.41898e+07	0.002	0.007686	2.66634	2	1061.68	-0.565757	29.0308	0	C1203	44.44	B1503	0.1554
High	YTFFTPNNI	20	1	1	P17844		0	1.39996e+08	0.002	0.008969	2.66629	2	1116.54	-0.330639	75.9458	0	C1203	70.37	A6802	0.0343
High	KKVVKETSY	2	1	1	Q9NZJ7		0	858167	0.002	0.006489	2.66306	2	1081.63	-0.160593	16.3826	0	C1203	37.04	B1503	0.0679
High	AKAPPPVFY	8	1	1	Q16643		0	1.34566e+07	0.002	0.006498	2.65759	2	989.545	-0.310936	45.5312	0	C1203	59.26	B1503	0.0077
High	EVLDILTRL	5	1	1	O75955		0	18888549	0.002	0.006725	2.64903	2	1071.64	-0.77363	79.6574	0	C1203	40.74	A6802	0.0191
High	TVIAKVNNV	12	1	1	P26639		0	1.37552e+07	0.002	0.007084	2.64765	2	957.572	-0.76466	34.8333	0	C1203	40.74	A6802	0.0132
High	KAIATTVTY	5	1	1	O43808		0	8.98944e+06	0.002	0.006344	2.64532	2	967.545	-0.521505	36.4097	0	C1203	81.48	B1503	0.0276
High	EVYGSLPAFL	15	1	1	Q01650		0	8.09026e+07	0.002	0.00675	2.64354	2	1095.57	-0.279633	86.9667	0	C1203	40	A6802	0.1394
High	SAAGFPIRV	2	1	1	Q96H55		0	3.95277e+06	0.002	0.006442	2.64033	2	917.52	-0.475456	53.1737	0	C1203	88.89	A6802	0.0336
High	GKVPVVVSY	3	1	1	Q9Y4C4		0	3.69426e+06	0.002	0.006552	2.63766	2	947.556	-0.45451	46.2522	0	C1203	51.85	B1503	0.0084
High	SKLTQILSY	2	1	1	Q13123		0	1.81213e+06	0.002	0.006337	2.63475	2	1052.6	-0.213785	56.4404	0	C1203	44.44	B1503	0.0308
High	RKNPVTSTY	8	1	1	Q13131		0	1.87796e+07	0.002	0.006505	2.63461	2	1065.57	-0.447082	21.4984	0	C1203	48.15	B1503	0.0024
High	AAFRIVVm	21	1	1	Q8WUI4	M8(Oxidation)	0	5.22134e+07	0.002	0.006117	2.63061	2	922.518	-0.215178	53.9157	0	C1203	80	C1203	0.9346
High	RQIKHMIKY	3	1	1	O15258		0	1.40954e+06	0.002	0.006274	2.62121	3	1216.7	0.0888842	21.1348	0	C1203	40.74	B1503	0.0031
High	QSLIPFVQL	1	1	1	P54278		0	6.33605e+07	0.002	0.006922	2.62104	2	1044.61	-0.387958	90.0446	0	C1203	70.37	C1203	1.4238
High	FKNIQPSSF	4	1	1	Q9BVQ7		0	5.30274e+06	0.002	0.006262	2.61983	2	1067.55	-0.468389	45.5779	0	C1203	37.04	B1503	0.027
High	KKHHSTIVY	2	1	1	Q5VT52		0	1.15963e+06	0.002	0.006488	2.61961	2	1112.62	-0.201409	17.5615	0	C1203	44.44	B1503	0.0117
High	SISDVIAQV	20	1	1	Q9HCJ1		0	7.0556e+07	0.002	0.006552	2.61095	2	931.509	-0.22153	70.3346	0	C1203	48.15	A6802	0.01
High	HKRIHGVGF	8	1	1	P62899		0	1.74845e+07	0.002	0.006491	2.60086	2	1050.6	-0.206347	22.1238	0	C1203	33.33	B1503	0.105
High	LVANIIQNV	10	1	1	O94915		0	8.92157e+06	0.002	0.009656	2.59574	2	983.588	-0.149316	68.2599	0	C1203	44.44	A6802	0.0264
High	SIIGRLLEV	4	1	1	P62136		0	4.67326e+06	0.002	0.01001	2.59196	2	999.62	-0.206944	71.5891	0	C1203	48.15	A6802	0.122
High	TVSEVIQGL	3	1	1	Q8WWW0		0	2.3308e+06	0.002	0.009747	2.57718	2	945.525	-0.631997	65.0404	0	C1203	48.15	A6802	0.0154
High	EIFDKIHSL	4	1	1	Q53GS7		0	1.31174e+07	0.002	0.006619	2.56571	2	1101.59	0.100254	51.8306	0	C1203	48.15	A6802	0.0079
High	AKLPSETIF	5	1	1	P57678		0	1.14918e+07	0.002	0.00721	2.56523	2	1005.56	-0.425146	54.0728	0	C1203	40.74	B1503	0.0346
High	VAADIAVQL	4	1	1	P08240		0	2.29641e+06	0.002	0.007052	2.55558	2	899.519	-0.282953	66.3034	0	C1203	88.89	C1203	0.0199
High	GKYASIILF	21	1	1	Q8TCB0		0	1.07912e+08	0.002	0.006786	2.5485	2	1011.59	-0.535504	67.7269	0	C1203	40.74	B1503	0.034
High	AHLDNLKGTF	3	2	2	P68871;P02042		0	4.36209e+06	0.002	0.006574	2.54265	2	1115.58	-1.12391	38.0137	0	C1203	37.14	B1503	1.7728
High	DQAEIRSLV	10	2	2	P09913;O14879		0	2.15784e+07	0.002	0.007701	2.53186	2	1030.55	-0.847913	50.7966	0	C1203	44.44	A6802	0.5213
High	FASHVSPEV	16	1	1	Q9NP61		0	7.56194e+07	0.002	0.006457	2.531	2	972.478	-0.562884	37.3987	0	C1203	85.19	A6802	0.0842
High	EVKEDIAKL	1	1	1	Q12931		0	3.36605e+06	0.002	0.007315	2.52934	2	1044.59	-0.289091	35.9627	0	C1203	44.44	A6802	0.1344
High	EILDLIHKV	9	1	1	O14981		0	9.96003e+06	0.002	0.009421	2.52262	2	1079.65	-0.611339	59.6783	0	C1203	44.44	A6802	0.0185
High	AVTKIIAKV	7	1	1	P49419		0	1.03044e+07	0.002	0.006589	2.52103	2	942.635	-0.183796	32.6905	0	C1203	44.44	A6802	0.1748
High	LAFPGEmLL	24	1	1	P43007	M7(Oxidation)	0	1.77653e+07	0.002	0.007486	2.50739	2	1006.53	0.0331138	83.4279	0	C1203	85.19	C1203	0.0274
High	RKLDQVSQF	11	1	1	O60502		0	3.12104e+07	0.002	0.007413	2.50236	2	1120.61	-0.192688	31.8346	0	C1203	37.04	B1503	0.0086
High	QAIGAIRTL	6	1	1	Q9H7E9		0	8.47559e+06	0.002	0.008361	2.49532	2	942.573	-0.619513	45.5239	0	C1203	88.89	C1203	0.026
High	HAAKVILQV	3	1	1	Q63HN8		0	1.91665e+07	0.002	0.007185	2.48909	2	978.609	-0.100859	35.9434	0	C1203	85.19	A6802	0.0357
High	FKIEPPGLF	5	2	2	Q969P6;P11387		0	5.94515e+06	0.002	0.006467	2.48821	2	1047.59	-0.536193	71.1977	0	C1203	40.74	B1503	0.0502
High	FTVPHTHVF	5	1	1	Q8NFZ0		0	1.26741e+07	0.002	0.00997	2.48811	2	1084.56	-0.271811	47.7883	0	C1203	74.07	C1203	0.0074
High	SSFPRFYFV	6	1	1	Q14204		0	2.35096e+07	0.002	0.009647	2.48678	2	1149.57	0.115065	72.3168	0	C1203	77.78	A6802	0.0816
High	FSVFGQVERA	4	1	1	Q15233		0	6.2022e+06	0.002	0.006302	2.46969	2	1139.58	-0.894781	55.533	0	C1203	34.29	A6802	1.3871
High	EVSPVSRQSI	4	1	1	Q9H6S3		0	4.54118e+06	0.002	0.006345	2.46751	2	1101.59	-0.239737	35.9558	0	C1203	20	A6802	0.3148
High	GKYFDKASY	4	1	1	P29401		0	2.95377e+06	0.002	0.006516	2.46449	2	1078.52	-0.0927469	29.7921	0	C1203	40.74	B1503	0.0216
High	NAFASVILF	14	1	1	P26641		0	8.06377e+07	0.002	0.008646	2.44858	2	981.54	-0.299125	91.2779	0	C1203	77.78	C1203	0.1134
High	WQKGIGEFF	2	1	1	Q15004		0	4.0752e+06	0.002	0.006579	2.44112	2	1111.56	-0.205959	63.9453	0	C1203	33.33	B1503	0.1056
High	AAATSVHVV	2	1	1	Q68EM7		0	3.94703e+06	0.002	0.008053	2.44015	2	854.473	0.415426	31.1975	0	C1203	88.89	C1203	0.3109
High	AAFEKALEV	8	1	1	Q13325		0	1.54238e+07	0.002	0.006331	2.43914	2	977.53	-0.209103	50.0157	0	C1203	92.59	C1203	0.0125
High	YAFPKAVSVFF	3	1	1	O15427		0	3.96854e+06	0.002	0.006233	2.4264	2	1275.68	-0.0781372	80.3995	0		0	C1203	0.9612
High	TAYPQVVVV	16	1	1	Q9ULI2		0	8.83776e+07	0.002	0.007132	2.42611	2	975.55	-0.541912	65.4754	0	C1203	96.3	C1203	0.008
High	KSFEGLFYF	10	1	1	Q00610		0	1.54148e+07	0.002	0.009647	2.4219	2	1137.56	-0.0987499	76.6229	0	C1203	66.67	C1203	0.086
High	KKKTEDEHF	3	1	1	Q9ULW0		0	1.97796e+06	0.002	0.008394	2.42171	2	1161.59	-0.437532	15.6834	0	C1203	29.63	B1503	0.6352
High	SLFVSNHAY	1	1	1	P04075		0	8.93929e+06	0.002	0.007614	2.40701	2	1037.5	-0.27273	45.3417	0	C1203	40.74	B1503	0.0392
High	RKLDFPSASF	3	1	1	O60344		0	3.07458e+06	0.002	0.006524	2.38037	2	1167.62	-0.0797483	49.4206	0	C1203	37.14	B1503	0.0456
High	mTSEIHNTV	20	1	1	O43264	M1(Oxidation)	0	1.98459e+07	0.002	0.009074	2.37891	2	1047.48	-0.339721	25.9845	0	C1203	77.78	A6802	0.0035
High	IKDNVVIVY	8	1	1	Q9Y2T2		0	2.08531e+07	0.002	0.007088	2.37498	2	1062.62	-0.899192	52.4065	0	C1203	48.15	B1503	0.0687
High	VKAEIRQQF	5	1	1	P30154		0	5.26015e+06	0.002	0.006407	2.37216	2	1118.63	-0.0732184	30.7545	0	C1203	40.74	B1503	0.0242
High	KLFPGSPAIY	8	7	7	P49792;P0DJD0;P0DJD1;A6NKT7;Q7Z3J3;Q99666;O14715		0	1.15005e+07	0.002	0.008121	2.36245	2	1092.61	-0.929533	58.5038	0	C1203	51.43	B1503	0.1045
High	YQSPVRVY	4	2	2	Q92503;O43304		0	5.25359e+06	0.002	0.00629	2.3472	2	1011.53	-0.258032	42.5971	0	C1203	43.33	B1503	0.0188
High	SKKPESTSF	7	1	1	Q9BT25		0	4.2277e+06	0.002	0.006427	2.34065	2	1010.52	0.0258511	18.9301	0	C1203	37.04	B1503	0.0119
High	YLLPDTKAY	3	1	1	P14625		0	8.20621e+06	0.002	0.007499	2.32865	2	1083.57	-0.376927	53.0098	0	C1203	51.85	B1503	0.0331
High	RQIVSGLKY	6	1	1	Q9NYY3		0	9.1199e+06	0.002	0.008488	2.31548	2	1063.63	-0.334159	35.2983	0	C1203	40.74	B1503	0.0041
High	AKYLPHSAGRY	2	1	1	P46782		0	1.87921e+06	0.002	0.00709	2.30287	3	1262.66	-0.213694	23.9452	0		0	B1503	0.9329
High	QVFPGLLERV	10	1	1	Q9UBB4		0	9.7974e+06	0.002	0.006472	2.2836	2	1157.67	-0.429634	67.3111	0	C1203	40	A6802	0.2207
High	SSFPTVVIY	18	1	1	Q9HCN4		0	1.23981e+08	0.002	0.006255	2.26271	2	1012.53	-0.523314	76.8737	0	C1203	85.19	C1203	0.0227
High	AQVPFEQIL	18	1	1	Q99828		0	1.21067e+08	0.002	0.007863	2.24914	2	1044.57	-0.385054	79.3197	0	C1203	48.15	B1503	0.1391
High	IGVEHVVVY	4	1	1	P49411		0	7.77252e+07	0.002	0.007122	2.246	2	1014.56	-0.8571	51	0	C1203	51.85	C1203	0.1241
High	GQFPFPTAL	4	1	1	Q765P7		0	1.89052e+06	0.002	0.00713	2.23387	2	977.509	0.000549388	82.6517	0	C1203	51.85	B1503	0.0106
High	ESIDIITRA	7	1	1	Q16531		0	1.94667e+07	0.002	0.006485	2.19955	2	1017.56	-0.068418	49.9581	0	C1203	37.04	A6802	0.0264
High	MTPEIIQKL	11	1	1	Q9UMS4		0	3.49171e+07	0.002	0.007819	2.19841	2	1072.61	-0.2724	57.0173	0	C1203	74.07	A6802	0.0397
High	ELFTGFIKV	13	1	1	Q86TM6		0	4.06102e+07	0.002	0.007427	2.19535	2	1053.6	-0.360215	74.0851	0	C1203	44.44	A6802	0.114
High	YFVPFIIIm	7	1	1	P35670	M9(Oxidation)	0	2.35591e+06	0.002	0.006077	2.17469	2	1158.63	-0.472972	104.326	0	C1203	48.15	C1203	0.8003
High	EVYGSVAKV	6	1	1	Q07864		0	1.87575e+07	0.002	0.006351	2.17348	2	951.514	-0.359963	37.4605	0	C1203	48.15	A6802	0.0054
High	QVCAIIERV	2	2	2	Q99613;B5ME19		0	2.00956e+07	0.002	0.007843	2.16337	2	1030.57	-0.565628	52.3583	0	C1203	40.74	A6802	0.5371
High	RVYPQAVYF	11	1	1	Q9Y4A5		0	7.99986e+07	0.002	0.006358	2.05959	2	1142.6	-0.035478	54.879	0	C1203	44.44	C1203	0.0071
High	IVTEIISEI	5	1	1	Q9BPX3		0	1.46704e+07	0.002	0.007582	2.01429	2	1016.59	-0.241492	78.5693	0	C1203	40.74	A6802	0.1107
High	EGYPGQRYY	3	1	1	P34896		0	5.3575e+06	0.002	0.006682	1.95474	2	1132.51	-0.0233081	38.0207	0	C1203	51.85	C1203	0.3641
High	YSSPEILRV	1	1	1	Q2MV58		0	547608	0.002	0.006862	1.9485	2	1063.58	-0.551894	53.4015	0	C1203	88.89	C1203	0.2389
High	YATFIVTNY	5	1	1	Q9HBL8		0	9.33644e+06	0.002	0.006291	1.94719	2	1091.54	-0.0955413	71.0362	0	C1203	81.48	C1203	0.1195
High	EVIGKITAL	9	1	1	O43264		0	3.61768e+07	0.002	0.008319	1.81775	2	943.582	-0.116981	53.4165	0	C1203	44.44	A6802	0.0198
High	RKDDPRLSF	6	1	1	P78527		0	6.6291e+07	0.002	0.008141	1.7172	2	1133.61	-0.639509	29.2737	0	C1203	37.04	B1503	0.0196
High	GQFGTINNF	1	1	1	Q14457		0	1.70066e+06	0.003	0.01358	3.07587	2	997.475	1.09257	61.3154	0	C1203	40.74	B1503	0.0065
High	AKLPEIEEY	3	1	1	Q9BQ39		0	5.06539e+06	0.003	0.01046	2.98159	2	1091.56	-1.25218	50.3944	0	C1203	55.56	B1503	0.0512
High	KKIPSTVEF	7	1	1	Q9H2G9		0	1.70282e+07	0.003	0.01038	2.83155	2	1048.6	-0.314844	35.4149	0	C1203	44.44	B1503	0.0044
High	SKFAGGLHF	10	1	1	Q09666		0	1.14213e+07	0.003	0.01145	2.82183	2	963.504	-0.479786	41.6909	0	C1203	37.04	B1503	0.003
High	AQYDQASTKY	1	1	1	P49454		0	790351	0.003	0.01427	2.81507	2	1174.54	-0.0938119	28.5665	0	C1203	40	B1503	0.0059
High	KGFPHVIYA	8	1	1	Q13485		0	3.04325e+07	0.003	0.01481	2.79798	2	1031.57	-0.357873	41.8138	0	C1203	18.52	C1203	0.7882
High	FTAAIISRV	8	1	1	Q9Y570		0	13185879	0.003	0.01211	2.79671	2	977.578	0.162881	54.5874	0	C1203	77.78	A6802	0.0048
High	RQEGVPRTF	14	1	1	Q00403		0	8.21022e+07	0.003	0.01318	2.76304	2	1089.58	-0.688402	28.9114	0	C1203	44.44	B1503	0.0078
High	LAAYHPWVV	6	1	1	Q5TA50		0	4.82024e+06	0.003	0.01187	2.76121	2	1055.57	-0.234092	58.5295	0	C1203	85.19	C1203	0.6113
High	NTCPYVHNI	7	1	1	Q9Y2Y1		0	2.36132e+07	0.003	0.01192	2.74245	2	1060.49	-0.32325	42.8006	0	C1203	70.37	A6802	0.2006
High	SSSGIVYKV	6	1	1	Q9P2E3		0	6.13348e+06	0.003	0.01438	2.73787	2	939.514	-0.159023	37.9581	0	C1203	77.78	A6802	0.0342
High	EVFGLFQKL	13	1	1	P15924		0	2.16136e+07	0.003	0.01445	2.7066	2	1080.61	-0.158358	73.2821	0	C1203	44.44	A6802	0.05
High	YKKQFSQY	3	1	1	P46777		0	6.39269e+06	0.003	0.01041	2.69396	2	1091.55	-0.430607	23.2354	0	C1203	43.33	B1503	1.1827
High	TQREFMLSF	2	1	1	Q96GM5		0	2.42695e+06	0.003	0.0136	2.69302	2	1158.56	-0.364837	64.7045	0	C1203	37.04	B1503	0.0105
High	GQAPPGKAL	8	1	1	A8MPP1		0	1.25755e+07	0.003	0.01138	2.67362	2	838.478	0.0915324	24.1372	0	C1203	51.85	B1503	0.0584
High	DVSNVIEKV	15	1	1	O94955		0	165581288	0.003	0.01051	2.64201	2	1002.55	-0.642593	51.2336	0	C1203	44.44	A6802	0.0314
High	LQRLENTQY	4	1	1	Q96D70		0	2.61842e+06	0.003	0.01254	2.6376	2	1164.6	-0.345101	34.5616	0	C1203	37.04	B1503	0.0108
High	GKYGFSDPLTF	3	2	2	Q92569;P27986		0	4.56092e+06	0.003	0.0112	2.61411	2	1231.6	0.00124482	67.2491	0		0	B1503	0.7111
High	GKYFEPEAY	1	1	1	Q96NE9		0	3.92432e+06	0.003	0.01192	2.61127	2	1103.5	-0.211427	44.8465	0	C1203	44.44	B1503	0.0289
High	STFIGEHYV	7	1	1	P08581		0	6.34266e+06	0.003	0.01249	2.60798	2	1052.5	-0.419229	49.6642	0	C1203	70.37	A6802	0.0172
High	EAADIIQKL	6	1	1	O00471		0	16118787	0.003	0.01381	2.60536	2	1000.57	-0.448915	53.8366	0	C1203	85.19	A6802	0.0324
High	NKYGKGIYF	2	1	1	Q7Z2W4		0	1.45229e+06	0.003	0.01247	2.5879	2	1089.57	-0.877737	36.4457	0	C1203	40.74	B1503	0.0307
High	EIFQKPFQTL	6	1	1	Q6DD88		0	8.16253e+06	0.003	0.01136	2.57449	2	1250.68	-0.272969	62.102	0	C1203	40	A6802	0.91
High	TGYIYPRLY	1	1	1	O14656		0	6.36063e+06	0.003	0.01164	2.54428	2	1145.6	0.0570201	58.4319	0	C1203	48.15	C1203	0.3626
High	KQLPESESF	1	1	1	Q8NI35		0	1.41998e+06	0.003	0.01416	2.53291	2	1064.53	-0.444401	36.4317	0	C1203	37.04	B1503	0.0082
High	QVFEGHTHYV	10	1	1	P35606		0	3.05511e+07	0.003	0.01054	2.5284	2	1216.57	0.0503542	32.6267	0	C1203	37.14	A6802	0.0215
High	STVSIQIKL	4	1	1	O60502		0	1.30886e+07	0.003	0.01187	2.52718	2	988.604	-0.20036	58.3689	0	C1203	74.07	A6802	0.0859
High	KEYERAIIF	11	1	1	P27105		0	1.73962e+07	0.003	0.01143	2.51997	2	1168.64	-0.396688	44.5853	0	C1203	40.74	B1503	0.0077
High	FVQELNKSL	1	1	1	Q14202		0	3.24245e+06	0.003	0.01318	2.51732	2	1077.59	-0.124074	64.5847	0	C1203	48.15	C1203	0.1836
High	GKFNPHVHVEY	2	1	1	Q9ULH1		0	5.4856e+06	0.003	0.01408	2.51103	3	1326.66	-0.146764	33.3705	0		0	B1503	0.8714
High	GVVDIFQTV	11	2	2	P23468;Q13332		0	3.88554e+07	0.003	0.0137	2.49069	2	977.53	-0.511064	81.8325	0	C1203	44.44	A6802	0.0738
High	EIYNGKLFDL	8	1	1	Q99661		0	6.55631e+06	0.003	0.0102	2.48463	2	1211.63	-0.543746	69.5592	0	C1203	37.14	A6802	1.3597
High	RAYPTVKFY	5	1	1	Q8IXB1		0	6.60792e+06	0.003	0.01151	2.45381	2	1144.61	-0.270552	43.4979	0	C1203	92.59	C1203	0.0143
High	AKLPTGTTL	2	1	1	P54098		0	3.00171e+06	0.003	0.01217	2.4516	2	901.535	-0.36666	40.9988	0	C1203	51.85	B1503	0.0734
High	AKYPEIKSL	11	1	1	O15121		0	5.46104e+07	0.003	0.01414	2.42332	2	1048.6	-0.770957	37.6478	0	C1203	59.26	B1503	0.0541
High	VmAPRTLVL	52	9	9	P01892;P30447;P05534;P18462;P30450;P30456;P30457;P01891;P10316	M2(Oxidation)	0	3.62835e+08	0.003	0.01397	2.41218	2	1015.6	-0.736838	52.3388	0	C1203	59.26	C1203	0.129
High	HVFDHPWETV	3	1	1	Q9Y3B1		0	3.79499e+06	0.003	0.01384	2.40976	2	1266.59	0.109214	51.06	0	C1203	37.14	A6802	0.0334
High	KKFKGDLAY	3	2	2	Q96K31;Q96EF9		0	9.33744e+06	0.003	0.01193	2.3811	2	1069.6	-0.274808	23.0436	0	C1203	44.44	B1503	0.0044
High	EISSILQEL	11	2	2	Q96L14;Q5SW79		0	2.93436e+07	0.003	0.01382	2.38064	2	1031.56	-0.0233169	83.7951	0	C1203	48.15	A6802	0.0689
High	HNAGISFSV	7	1	1	P40692		0	2.9748e+07	0.003	0.01235	2.36888	2	931.463	-0.325377	49.0138	0	C1203	44.44	A6802	0.2808
High	AMNPTNTVF	8	1	1	P11142		0	1.39007e+07	0.003	0.01404	2.35281	2	994.466	-0.118871	56.6971	0	C1203	44.44	B1503	0.0048
High	RQPDSPTALY	6	1	1	Q9BQG0		0	1.47215e+07	0.003	0.01229	2.32853	2	1147.57	-0.306004	40.1912	0	C1203	34.29	B1503	0.0394
High	EVFGHAIKA	11	1	1	P54136		0	5.36418e+07	0.003	0.01263	2.32666	2	971.531	-0.198674	33.3677	0	C1203	11.11	A6802	0.0322
High	EVNSGIYRV	2	1	1	Q0VDF9		0	1.97846e+07	0.003	0.01321	2.2913	2	1036.54	-0.175115	39.6597	0	C1203	44.44	A6802	0.0069
High	HAAGVLLHV	1	1	1	Q6UX98		0	6.26773e+06	0.003	0.01108	2.28672	2	916.536	-0.186451	37.6291	0	C1203	85.19	A6802	0.0153
High	YAFLHRTL	2	2	2	Q9UH17;Q8IUX4		0	4.67326e+06	0.003	0.0106	2.28553	2	1020.56	-0.900709	42.1235	0	C1203	90	C1203	0.2862
High	SKHRAQVIY	3	1	1	P62851		0	2.84879e+06	0.003	0.01254	2.2832	2	1101.62	-0.554681	19.0426	0	C1203	40.74	B1503	0.0587
High	GKLQKTVSY	7	1	1	P12757		0	3.71838e+06	0.003	0.01311	2.27385	2	1023.58	-0.289072	23.6418	0	C1203	40.74	B1503	0.0306
High	KQQNPRLVY	3	1	1	O00764		0	8.8347e+06	0.003	0.01387	2.27313	2	1145.64	-0.085233	27.675	0	C1203	44.44	B1503	0.0037
High	SAFPEVRSL	7	1	1	Q6YHU6		0	2.11621e+07	0.003	0.01466	2.27059	2	1005.54	-0.239562	52.1431	0	C1203	92.59	C1203	0.0047
High	MKFPTQSSF	1	1	1	Q9HCD6		0	3.01221e+06	0.003	0.01499	2.23379	2	1072.51	-0.692327	51.0139	0	C1203	40.74	B1503	0.0041
High	KQIVEILTAY	1	1	1	Q16891		0	2.07667e+06	0.003	0.0109	2.23154	2	1177.68	-0.375929	63.666	0	C1203	28.57	B1503	0.0421
High	ETIPGPDAKV	6	1	1	Q8TDP1		0	1.77007e+07	0.003	0.01364	2.22183	2	1026.55	-0.45894	40.6245	0	C1203	48.57	A6802	0.0331
High	KAYGKAKSI	2	2	2	Q99613;B5ME19		0	784077	0.003	0.01232	2.20177	2	965.578	-0.0143717	16.1482	0	C1203	77.78	C1203	0.0613
High	RKLFIGGLSF	6	4	4	Q32P51;P09651;P22626;P51991		0	3.69543e+07	0.003	0.01223	2.19597	2	1137.68	-0.363431	61.7613	0	C1203	37.14	B1503	0.0701
High	RQVGATVEF	4	1	1	Q13432		0	1.19599e+07	0.003	0.01489	2.13285	2	1006.53	-0.371276	41.0784	0	C1203	40.74	B1503	0.0032
High	FSQDHLVIY	2	1	1	Q9BW91		0	1.30036e+07	0.003	0.01231	2.04212	2	1121.56	-0.600995	55.675	0	C1203	77.78	C1203	0.0724
High	RAAPFSLEY	2	1	1	Q15181		0	1.09867e+07	0.003	0.01369	1.93611	2	1053.54	-0.103289	54.3917	0	C1203	92.59	C1203	0.008
High	RQINWTVLY	3	1	1	P83731		0	4.28989e+07	0.003	0.01016	1.93423	2	1192.65	-0.277572	63.3676	0	C1203	40.74	B1503	0.0094
High	RKFEPGTQRF	3	2	2	Q96BX8;Q86TA1		0	2.68077e+06	0.004	0.01645	3.1156	3	1265.68	0.0483243	25.2936	0	C1203	45.71	B1503	0.0134
High	MKFIDNTLY	6	1	1	Q14116		0	4.10521e+06	0.004	0.01743	2.93471	2	1144.57	0.298121	59.5815	0	C1203	40.74	B1503	0.0414
High	SKAPAPVTY	2	1	1	Q9H0R1		0	2.22106e+06	0.004	0.0171	2.8128	2	933.504	-0.355212	31.8485	0	C1203	59.26	B1503	0.0034
High	GKRLDVTGF	5	1	1	Q9UIY3		0	5.22358e+06	0.004	0.01729	2.73184	2	992.552	-0.425956	36.2122	0	C1203	33.33	B1503	0.1662
High	HTILIVEKV	4	1	1	Q8TD19		0	1.393e+07	0.004	0.01555	2.73034	2	1051.65	-1.51157	43.7086	0	C1203	70.37	A6802	0.0187
High	AASSIQRVL	9	2	2	Q5BKT4;Q5I7T1		0	1.50001e+07	0.004	0.01636	2.72871	2	944.552	-0.566251	39.0388	0	C1203	92.59	C1203	0.2688
High	IAYIRDLAL	6	1	1	O00116		0	4.26773e+06	0.004	0.01519	2.63846	2	1047.62	-0.537482	64.2341	0	C1203	81.48	C1203	0.0119
High	EVFGVIRSL	1	1	1	Q15393		0	1.08175e+07	0.004	0.01704	2.62264	2	1019.59	-0.213714	64.5775	0	C1203	51.85	A6802	0.0286
High	GQNKKVMIY	4	2	2	Q14839;Q8TDI0		0	1.12225e+07	0.004	0.0172	2.60117	2	1080.59	-0.666296	25.6924	0	C1203	40.74	B1503	0.0144
High	SKTGGYLVY	3	1	1	P46087		0	5.33018e+06	0.004	0.01625	2.55478	2	987.514	-0.326588	42.106	0	C1203	48.15	B1503	0.0282
High	NTTDIFQTV	19	1	1	P37802		0	4.73216e+08	0.004	0.01725	2.53596	2	1038.51	-0.421832	66.1165	0	C1203	74.07	A6802	0.0045
High	EVFNDVRLL	5	2	2	P52907;P47755		0	2.49065e+06	0.004	0.01699	2.51079	2	1104.6	-0.16245	65.4232	0	C1203	48.15	A6802	0.1342
High	LKSPGSVVF	3	1	1	O75787		0	7.61815e+06	0.004	0.01583	2.4966	2	933.54	-0.314506	48.2356	0	C1203	48.15	B1503	0.01
High	EAVSFQHFI	6	1	1	Q99598		0	7.6186e+06	0.004	0.01621	2.45064	2	1077.54	-0.214275	61.9414	0	C1203	70.37	A6802	0.0811
High	YKKPDLERY	2	1	1	P35670		0	3.18101e+06	0.004	0.0151	2.38316	3	1211.64	-0.621759	27.8173	0	C1203	48.15	B1503	0.1376
High	THLKPGTLY	8	1	1	Q53EP0		0	3.37199e+07	0.004	0.01653	2.34072	2	1029.57	-0.336068	31.4675	0	C1203	37.04	B1503	0.1918
High	EVYPFGIVGM	1	1	1	O75534		0	2.51929e+06	0.004	0.01731	2.33375	2	1111.55	-0.0534077	90.1511	0	C1203	28.57	A6802	0.0891
High	RLLDTTITF	5	1	1	Q8N766		0	1.60046e+07	0.004	0.01661	2.21627	2	1079.61	-0.373137	65.7591	0	C1203	40.74	B1503	0.0141
High	SALEHVVEF	6	1	1	O75581		0	3.15057e+07	0.004	0.01722	2.06801	2	1030.52	-0.116475	56.2469	0	C1203	81.48	C1203	0.0225
High	DVVNILVYV	3	1	1	Q15652		0	1.25785e+07	0.004	0.01532	2.00149	2	1033.59	-0.275161	99.9757	0	C1203	40.74	A6802	0.011
High	FAMPYFIQV	6	1	1	Q00610		0	8.15239e+06	0.004	0.01738	1.98184	2	1115.56	-0.0784623	93.5199	0	C1203	88.89	C1203	0.0468
High	ETAPRTIFQRV	2	1	1	Q9UBB4		0	7.0941e+07	0.004	0.01677	1.67575	3	1317.73	-0.0468293	42.1527	0		0	A6802	0.5705
High	KKFNEPGSQY	2	1	1	P51531		0	1.55935e+06	0.005	0.01791	3.19899	2	1197.59	-0.92568	24.0569	0	C1203	40	B1503	0.0373
High	SVTQIYHAV	6	1	1	P04844		0	4.52708e+06	0.005	0.01757	2.87289	2	1017.54	-0.447188	42.3632	0	C1203	37.04	A6802	0.0354
High	SAAEEVKTY	1	1	1	Q5JRA6		0	482907	0.005	0.02006	2.8092	2	997.483	-0.684232	28.0942	0	C1203	92.59	C1203	0.1392
High	RKKDGQVTF	3	1	1	Q9BW60		0	8.22066e+06	0.005	0.01775	2.80866	2	1078.6	0.0835953	18.4813	0	C1203	40.74	B1503	0.0089
High	SKLQNNNVY	4	1	1	P63010		0	3.58686e+06	0.005	0.01936	2.8034	2	1079.55	-6.33945e-05	25.901	0	C1203	40.74	B1503	0.0398
High	AKLKGIGEY	4	1	1	Q92620		0	8.12847e+06	0.005	0.0175	2.78175	2	978.562	-0.212755	30.0497	0	C1203	48.15	B1503	0.0283
High	RQLPGSQRY	1	1	1	Q96BD0		0	1.7016e+06	0.005	0.01884	2.77874	2	1104.59	-0.80381	22.7168	0	C1203	44.44	B1503	0.0018
High	SKLPSSIEY	3	1	1	Q15386		0	7.26298e+06	0.005	0.01822	2.76508	2	1023.54	-0.157533	44.0801	0	C1203	51.85	B1503	0.0129
High	RAFDQKLIF	6	1	1	Q8TDB6		0	8.42671e+06	0.005	0.01967	2.75066	2	1137.64	-0.888481	50.8393	0	C1203	77.78	C1203	0.0141
High	AATEIVERV	3	1	1	Q9UID3		0	6.03152e+06	0.005	0.01957	2.74828	2	987.547	-0.316787	39.9159	0	C1203	85.19	A6802	0.27
High	GKAFSQSSY	7	3	3	Q9UNY5;Q8NF99;Q9NQZ8		0	5.38845e+06	0.005	0.01828	2.73826	2	974.458	0.0626048	26.5984	0	C1203	40.74	B1503	0.1022
High	AKYKNQVVY	4	1	1	Q9NVR2		0	1.9952e+06	0.005	0.0199	2.71072	2	1112.61	-0.311548	24.397	0	C1203	51.85	B1503	0.0038
High	SAYANAKKY	1	1	1	O60524		0	1.34848e+06	0.005	0.01949	2.65709	2	1015.52	-0.24315	18.4721	0	C1203	81.48	C1203	0.0878
High	KAISGVHTV	4	2	2	Q2VIR3;P41091		0	3.86919e+06	0.005	0.01859	2.60326	2	911.531	0.0670553	21.8755	0	C1203	85.19	C1203	0.0197
High	DSFYVHHDI	2	1	1	Q13610		0	1.6498e+06	0.005	0.01786	2.58483	2	1132.51	-0.678865	40.5053	0	C1203	62.96	A6802	0.629
High	EAFHYIFNV	8	1	1	Q9UEY8		0	2.16355e+08	0.005	0.01885	2.57144	2	1139.55	-0.322898	69.6259	0	C1203	81.48	A6802	0.0266
High	YAYFNFPEL	3	1	1	Q8IY21		0	3.42512e+06	0.005	0.0178	2.55195	2	1163.54	0.321427	90.8756	0	C1203	85.19	C1203	0.0076
High	VAIVRPSIV	1	1	1	Q8WVX9		0	1.53352e+06	0.005	0.01975	2.52172	2	953.614	-0.230732	52.1352	0	C1203	81.48	C1203	0.3123
High	FAIPLIEKL	3	1	1	Q9NR30		0	5.62811e+06	0.005	0.01942	2.47788	2	1043.65	0.18472	79.0473	0	C1203	88.89	C1203	0.0276
High	EIFADPRTV	3	1	1	Q92871		0	1.45922e+07	0.005	0.01901	2.45318	2	1047.55	-1.58047	50.7629	0	C1203	51.85	A6802	0.1054
High	RQYPTPFQL	7	1	1	Q8ND82		0	8.39712e+06	0.005	0.01833	2.43588	2	1149.61	0.105174	58.3485	0	C1203	51.85	B1503	0.0118
High	EIFSKNYRV	6	1	1	Q9NVU0		0	1.8919e+07	0.005	0.0187	2.43401	2	1155.62	-0.0632696	37.4941	0	C1203	44.44	A6802	0.0224
High	LAIEHVRFF	2	1	1	Q8NEM2		0	3.76526e+06	0.005	0.01927	2.42443	2	1131.63	-0.506002	59.4176	0	C1203	77.78	C1203	0.0599
High	GKLISVEY	6	1	1	Q8IVG5		0	5.56769e+06	0.005	0.0192	2.41915	2	908.509	-0.218797	46.8868	0	C1203	36.67	B1503	1.2584
High	KQFPTAFEF	1	1	1	Q13496		0	2314439	0.005	0.01991	2.41535	2	1114.56	0.42822	62.8337	0	C1203	44.44	B1503	0.0065
High	EVISKLYAV	26	1	1	P50990		0	7.76061e+08	0.005	0.01879	2.40314	2	1021.59	-0.696609	53.9416	0	C1203	40.74	A6802	0.0052
High	EVIRDVINV	12	1	1	Q6IEG0		0	4.01432e+07	0.005	0.01894	2.38319	2	1056.6	-0.400892	55.7352	0	C1203	44.44	A6802	0.0084
High	FRLLGNVL	11	2	2	P68871;P02042		0	1.85588e+07	0.005	0.01895	2.3697	2	931.572	-0.10528	67.8689	0	C1203	50	B1503	4.3558
High	ISPSHIWIF	5	1	1	O94915		0	5.21186e+06	0.005	0.01926	2.36788	2	1099.59	-0.0908628	73.938	0	C1203	66.67	C1203	1.4075
High	RAFGIPIRV	15	1	1	P06493		0	6.00554e+08	0.005	0.0187	2.36125	2	1028.64	-0.96995	51.9502	0	C1203	88.89	C1203	0.0166
High	EVIEKFDYV	3	1	1	Q92871		0	5.57368e+06	0.005	0.01935	2.33894	2	1141.58	0.384756	55.8905	0	C1203	40.74	A6802	0.0043
High	RSFPGFQAF	3	1	1	Q01780		0	5.48215e+06	0.005	0.0187	2.32981	2	1056.53	-0.250628	60.9558	0	C1203	70.37	B1503	0.0055
High	KKNKDNVKF	2	1	1	P63173		0	2.47703e+06	0.005	0.01981	2.32423	2	1120.65	-0.531109	16.0759	0	C1203	33.33	B1503	0.0373
High	TTFPRPVTV	26	1	1	Q15233		0	6.39521e+08	0.005	0.01942	2.31697	2	1017.57	-1.07946	48.7586	0	C1203	88.89	A6802	0.0056
High	NSSQVVVAV	10	1	1	Q16531		0	5.7546e+07	0.005	0.02004	2.31513	2	902.494	-0.160828	48.958	0	C1203	77.78	A6802	0.0339
High	YTSGPGSRI	4	1	1	P05787		0	1.10142e+07	0.005	0.01873	2.27701	2	937.474	-0.128952	26.8162	0	C1203	70.37	A6802	0.0996
High	HTFYNELRV	7	10	10	Q562R1;Q9BYX7;P60709;P68032;P63261;P68133;Q6S8J3;A5A3E0;P0CG38;P0CG39		0	1.47785e+07	0.005	0.01783	2.26559	2	1178.59	-0.766464	44.3951	0	C1203	74.07	A6802	0.0419
High	VKAPSSQTF	3	1	1	Q86TC9		0	3.21616e+06	0.005	0.01966	2.26189	2	964.51	-0.0498453	31.5258	0	C1203	48.15	B1503	0.0054
High	ASFDGRISVY	2	1	1	O94979		0	1.61565e+07	0.005	0.019	2.15334	2	1114.55	-0.00836771	52.136	0	C1203	80	B1503	0.1962
High	KHLDKFSSY	2	1	1	Q8N884		0	1.82915e+06	0.005	0.01881	1.96962	2	1124.57	-0.414072	23.5585	0	C1203	40.74	B1503	0.0607
High	EAFKPFLGI	2	1	1	Q14974		0	5.67722e+06	0.005	0.01934	1.87796	2	1021.57	-0.107152	70.7561	0	C1203	74.07	A6802	0.0519
High	KQYKVVVY	3	1	1	P08754		0	1.46203e+07	0.006	0.02288	2.8323	2	1026.6	-0.305193	31.1135	0	C1203	30	B1503	0.018
High	ELSDIAHRI	4	1	1	P04075		0	3.71702e+06	0.006	0.0213	2.79791	2	1053.57	-0.702885	42.3135	0	C1203	37.04	A6802	0.0569
High	QKLIFTVGY	2	1	1	Q8TDB6		0	1.12772e+07	0.006	0.02065	2.7217	2	1068.61	-0.255653	61.3779	0	C1203	40.74	B1503	0.606
High	RKFQPYKPFYY	2	1	1	Q15047		0	5.62225e+06	0.006	0.02316	2.70473	3	1536.8	-0.385744	42.2166	0		0	B1503	1.0936
High	GKSTSIQSF	6	1	1	P13797		0	5.44051e+06	0.006	0.02071	2.6983	2	954.488	-0.830237	31.0648	0	C1203	37.04	B1503	0.0291
High	GKAEVAVTLY	3	1	1	Q9NSG2		0	6.78705e+06	0.006	0.02125	2.69778	2	1050.58	-0.325629	48.0287	0	C1203	28.57	B1503	0.256
High	IKVIPTVF	7	1	1	P14902		0	2.60977e+07	0.006	0.02034	2.68623	2	916.586	-0.404791	64.1925	0	C1203	33.33	B1503	0.797
High	VAIQAVLSL	3	9	9	P62736;Q562R1;Q9BYX7;P60709;P68032;P63261;P63267;P68133;A5A3E0		0	5.17252e+06	0.006	0.02126	2.66958	2	913.571	-0.309301	81.89	0	C1203	85.19	C1203	0.0185
High	TVFSHAQTV	7	2	2	Q71UM5;P42677		0	2.09273e+07	0.006	0.02292	2.64131	2	989.505	-0.419431	33.9977	0	C1203	48.15	A6802	0.0314
High	TTISKVSQV	4	1	1	Q9UNX4		0	3.55878e+06	0.006	0.02022	2.61338	2	962.551	-0.293075	30.6939	0	C1203	74.07	A6802	0.0155
High	RQQQSQTAY	2	2	2	Q99613;B5ME19		0	1.45649e+06	0.006	0.02229	2.61156	2	1109.53	-0.382789	17.7135	0	C1203	37.04	B1503	0.0031
High	TNSSVIVRV	2	1	1	Q8NI29		0	3.27901e+06	0.006	0.02089	2.60266	2	974.563	-0.299243	39.5834	0	C1203	51.85	A6802	0.6352
High	SKLFSSVTF	2	1	1	Q9HAV4		0	2.82064e+06	0.006	0.02014	2.59468	2	1015.55	-0.566804	59.4426	0	C1203	37.04	B1503	0.0662
High	GKLVQIEY	11	1	1	P25787		0	1.7433e+07	0.006	0.02174	2.59418	2	949.536	0.305196	47.2261	0	C1203	36.67	B1503	1.737
High	SIAQIIVTV	4	1	1	Q9UNQ0		0	1.04338e+07	0.006	0.02112	2.59036	2	943.582	-0.623859	78.1849	0	C1203	51.85	A6802	0.0211
High	KKPESFFTQF	4	1	1	Q9UBE0		0	7.0723e+06	0.006	0.02086	2.56001	2	1258.65	-0.037545	50.605	0	C1203	28.57	B1503	1.4103
High	RKKKIEEAM	1	1	1	Q13435		0	862815	0.006	0.02267	2.51864	2	1132.65	-0.285239	16.5256	0	C1203	29.63	B1503	0.3781
High	AKFSRPAQL	2	1	1	P22314		0	7.63474e+06	0.006	0.02062	2.50561	2	1017.58	-0.369048	29.2851	0	C1203	51.85	B1503	0.2105
High	AQRQDIAFAY	1	1	1	P07355		0	4.96021e+06	0.006	0.02033	2.50049	2	1182.59	-0.399142	48.2181	0	C1203	31.43	B1503	0.023
High	KQPDNSPEY	4	1	1	Q9NX07		0	1.9771e+06	0.006	0.02165	2.47774	2	1077.48	-0.427636	22.6235	0	C1203	44.44	B1503	0.0567
High	EVYEKPVQV	7	1	1	Q9Y508		0	2.72212e+07	0.006	0.02129	2.47029	2	1090.58	-0.90723	39.1027	0	C1203	51.85	A6802	0.0058
High	ELINIIDGV	8	1	1	Q8NI22		0	11712767	0.006	0.02107	2.46149	2	985.556	-0.171768	84.2736	0	C1203	40.74	A6802	0.0378
High	YPVEIHEYL	3	1	1	Q13901		0	2.16447e+06	0.006	0.02308	2.4585	2	1162.58	-0.203842	60.1684	0	C1203	44.44	A6802	0.4776
High	AAYPEIVAV	2	1	1	Q17RS7		0	4.01415e+06	0.006	0.02044	2.41308	2	932.509	-0.0929847	67.7231	0	C1203	96.3	C1203	0.0061
High	QVANVRFNV	2	1	1	P30154		0	1.32801e+07	0.006	0.02139	2.41111	2	1046.57	0.178792	46.9287	0	C1203	40.74	A6802	0.015
High	EVFFKEIFL	3	2	2	Q9Y6D6;Q9Y6D5		0	8.99516e+06	0.006	0.02026	2.39329	2	1171.64	-0.428011	81.5461	0	C1203	44.44	A6802	0.0757
High	KKTGKTVSY	1	1	1	O00244		0	2.03226e+06	0.006	0.02139	2.38963	2	1011.58	-0.352837	16.0324	0	C1203	44.44	B1503	0.0228
High	VmAPRTLLL	32	19	19	P30443;P04439;P13746;P30512;P16188;P16189;P10314;P16190;P30455;P30459;Q07000;P04222;P30504;Q9TNN7;Q29963;P30505;P30508;P30510;Q29960	M2(Oxidation)	0	1.80938e+08	0.006	0.02256	2.3796	2	1029.61	-0.57325	55.7681	0	C1203	55.56	C1203	0.2043
High	YAYDGKDYL	6	17	17	P17693;P01892;P30447;P05534;P10316;P01889;P30460;Q04826;P30479;P30480;P30486;P18464;P30490;P30498;Q31610;P30499;P04222		0	4.72209e+06	0.006	0.02117	2.36036	2	1107.5	-0.345223	46.9639	0	C1203	85.19	C1203	0.0044
High	RKYVNGSTY	3	1	1	Q6P2Q9		0	2.4614e+06	0.006	0.02283	2.34097	2	1087.55	-0.181376	20.8092	0	C1203	44.44	B1503	0.0043
High	STYIKKIGY	6	2	2	P68104;Q5VTE0		0	6.60091e+06	0.006	0.02103	2.32441	2	1072.6	-0.621253	33.4895	0	C1203	74.07	C1203	0.3439
High	GKFHSIVRL	4	1	1	O00567		0	7.42088e+06	0.006	0.02311	2.31039	2	1056.63	-0.738704	32.1839	0	C1203	48.15	B1503	0.5551
High	SVYDGHGGEEV	2	1	1	O15355		0	3.15133e+06	0.006	0.02299	2.28271	2	1148.49	0.123643	33.1946	0		0	A6802	0.6841
High	YTTDFIFNL	2	1	1	P08237		0	1.24939e+07	0.006	0.02133	2.27888	2	1133.55	-0.271987	92.5519	0	C1203	77.78	A6802	0.0178
High	RQAPTGLGL	4	1	1	Q9BX59		0	6.21043e+06	0.006	0.02339	2.27654	2	912.526	-0.624608	39.8283	0	C1203	51.85	B1503	0.0219
High	ESFEKAYQV	9	1	1	Q86V86		0	1.55739e+07	0.006	0.02194	2.27198	2	1100.53	-0.420777	42.3964	0	C1203	74.07	A6802	0.0087
High	GKSSLIVSY	3	1	1	Q96L33		0	7.4766e+06	0.006	0.02255	2.2523	2	953.53	-0.182904	43.7693	0	C1203	51.85	B1503	0.0338
High	GKVKSGGTY	2	1	1	P55017		0	3.4777e+06	0.006	0.02143	2.25158	2	896.483	-0.217811	15.8963	0	C1203	40.74	B1503	0.1015
High	EVSRISEVL	11	1	1	Q07065		0	2.62305e+07	0.006	0.02084	2.24616	2	1031.57	-0.505893	49.27	0	C1203	44.44	A6802	0.1187
High	YASNITSVL	2	2	2	Q13085;O00763		0	1.15136e+07	0.006	0.02362	2.19844	2	967.509	-0.255701	63.9818	0	C1203	85.19	C1203	0.0072
High	RKKAYADFY	9	1	1	P09669		0	2.78626e+07	0.006	0.02341	2.168	2	1161.6	-0.211176	26.4709	0	C1203	37.04	B1503	0.1727
High	FTTHILEVI	2	1	1	P15927		0	6.93908e+07	0.006	0.02062	2.15482	2	1072.6	-0.298476	68.2833	0	C1203	66.67	A6802	0.3783
High	HATDVLHAV	5	2	2	Q14432;Q13370		0	3.08145e+06	0.006	0.02114	2.12878	2	962.505	-0.150314	34.3827	0	C1203	77.78	A6802	0.0167
High	FAADIISVL	4	1	1	Q13200		0	4.86783e+07	0.006	0.02341	2.02892	2	948.54	-0.219015	88.6096	0	C1203	92.59	C1203	0.0035
High	ETFEHPNVV	6	1	1	Q00534		0	5.87956e+07	0.006	0.0227	1.96027	2	1071.51	-0.498302	42.8705	0	C1203	81.48	A6802	0.0088
High	YAYEKPHVV	1	1	1	Q15751		0	2.36275e+06	0.006	0.02231	1.83575	2	1105.57	-0.456806	32.2951	0	C1203	92.59	C1203	0.0033
High	YTTDFIYQL	9	1	1	Q01813		0	3.65191e+07	0.006	0.02296	1.72953	2	1163.56	-0.204711	81.2733	0	C1203	77.78	A6802	0.009
High	EAMELIVKL	2	1	1	Q9BVS4		0	3.81999e+06	0.007	0.02456	2.96311	2	1045.6	-0.488311	69.0438	0	C1203	85.19	A6802	0.0413
High	GKLKPTMAF	3	1	1	Q6YN16		0	5.22358e+06	0.007	0.02582	2.81823	2	992.56	0.481581	36.6678	0	C1203	29.63	B1503	0.0167
High	DSHFFFHLI	5	1	1	Q8NC54		0	4.59745e+06	0.007	0.02559	2.63223	2	1162.57	-0.000462069	73.4219	0	C1203	59.26	A6802	0.59
High	AAAATVREL	1	1	1	Q9UP83		0	545267	0.007	0.03062	2.61348	2	901.51	0.10006	32.2937	0	C1203	92.59	C1203	0.0807
High	AAFDGHAREL	4	1	1	Q3MIP1		0	3.69176e+06	0.007	0.0242	2.58525	2	1086.53	0.244156	30.9352	0	C1203	82.86	C1203	0.3533
High	GQRFLEVQY	1	1	1	Q15149		0	2.05386e+06	0.007	0.02459	2.57249	2	1139.58	-0.448757	52.9313	0	C1203	40.74	B1503	0.0855
High	DVYSGTPTKV	1	1	1	Q14493		0	4.55549e+06	0.007	0.02923	2.56081	2	1066.54	-0.57208	39.1029	0	C1203	40	A6802	0.151
High	STADVIQHC	5	1	1	Q5SRE5		0	5.00656e+06	0.007	0.02773	2.55095	2	973.441	-0.259881	33.7898	0	C1203	40.74	A6802	0.3628
High	KASPLTFTV	5	1	1	P09884		0	1.45508e+07	0.007	0.02674	2.53476	2	963.551	-0.115631	53.6283	0	C1203	88.89	C1203	0.1183
High	EVSQVKETL	8	1	1	P30622		0	1.47693e+07	0.007	0.02664	2.53103	2	1032.56	-0.270141	34.1302	0	C1203	44.44	A6802	0.1209
High	ETIIDTKGV	4	1	1	Q9GZS1		0	4.76237e+06	0.007	0.02395	2.52826	2	975.536	-0.185785	42.5345	0	C1203	70.37	A6802	0.0365
High	FKIKITSEL	5	1	1	Q14141		0	1.09167e+07	0.007	0.02546	2.50806	2	1078.65	-1.62047	50.3161	0	C1203	44.44	B1503	0.5186
High	GQIPQILYY	1	1	1	O75592		0	3.96694e+06	0.007	0.02963	2.49636	2	1094.59	-0.474414	76.7257	0	C1203	51.85	B1503	0.0067
High	DIATILSKV	11	1	1	Q8NG31		0	1.28934e+07	0.007	0.02807	2.47651	2	959.577	-0.34436	73.2616	0	C1203	40.74	A6802	0.0368
High	HAAELIKTV	1	1	1	Q8WUM4		0	3.54045e+06	0.007	0.02879	2.47422	2	981.572	-0.435058	31.9337	0	C1203	92.59	A6802	0.0764
High	EIIQRIENV	3	1	1	Q9H074		0	3.55206e+06	0.007	0.03033	2.44977	2	1113.63	-0.577707	49.5171	0	C1203	40.74	A6802	0.0496
High	EQYESFVKF	4	1	1	Q9H9L7		0	3.93621e+06	0.007	0.02425	2.41149	2	1176.56	0.290182	59.9946	0	C1203	40.74	B1503	0.0121
High	AAYQSVRIL	8	1	1	Q9HAT2		0	1.44957e+07	0.007	0.02612	2.40904	2	1020.58	-0.0250221	49.3635	0	C1203	88.89	C1203	0.0263
High	STVEVIFHV	6	2	2	Q6GYQ0;Q2PPJ7		0	8.01288e+06	0.007	0.02476	2.40803	2	1030.56	-0.593231	63.6847	0	C1203	74.07	A6802	0.0036
High	VTFSGIHLL	2	1	1	Q8N3Z3		0	3.13285e+06	0.007	0.02585	2.34831	2	986.567	-0.349034	68.9618	0	C1203	81.48	C1203	0.0373
High	EVFLKAFAV	5	1	1	O95373		0	8.00251e+06	0.007	0.02539	2.27269	2	1023.59	-0.548765	68.8439	0	C1203	40.74	A6802	0.0388
High	KLYPLEIVF	8	1	1	Q9NQT5		0	4.06339e+06	0.007	0.02751	2.26329	2	1121.66	-0.636255	79.5966	0	C1203	48.15	B1503	0.0554
High	AIAPIIAAV	5	1	1	Q9BQ52		0	7.33761e+06	0.007	0.02954	2.24378	2	838.54	-0.00101329	74.8404	0	C1203	55.56	A6802	0.022
High	FGVDRAILY	6	1	1	P06756		0	8.08173e+06	0.007	0.02542	2.20476	2	1053.57	-0.347395	59.6013	0	C1203	48.15	C1203	0.0963
High	YVVPFVAKV	2	1	1	A5YKK6		0	3.38315e+06	0.007	0.02631	2.14446	2	1021.61	-0.160086	63.6699	0	C1203	51.85	A6802	0.0096
High	RKFPVPKPIDY	2	1	1	Q9BVS4		0	7.00215e+06	0.007	0.02397	2.0246	3	1359.78	-0.363735	41.3686	0		0	B1503	0.8333
High	EAFDRSFEV	10	1	1	Q7Z4W1		0	9.52137e+07	0.007	0.02895	1.99933	2	1099.5	-0.981506	53.7918	0	C1203	85.19	A6802	0.0048
High	HTSPLTQIRL	3	1	1	Q96BP3		0	1.12088e+07	0.007	0.02926	1.96333	2	1165.67	-0.376385	46.7477	0	C1203	51.43	A6802	0.5137
High	FAHLPKSTF	4	1	1	P26641		0	7.45169e+06	0.007	0.02543	1.88304	2	1047.56	-0.280702	41.0556	0	C1203	74.07	C1203	0.0247
High	NTYGFPIIF	2	1	1	P11498		0	1.03073e+07	0.007	0.02827	1.78801	2	1071.55	-0.379443	94.9097	0	C1203	74.07	C1203	0.073
High	KKPDLPQTNF	1	1	1	Q13356		0	6.29257e+06	0.008	0.03481	2.81975	2	1187.64	-0.357186	37.0522	0	C1203	34.29	B1503	1.0526
High	GKVKSGGTYF	1	1	1	P55017		0	1.24258e+06	0.008	0.03097	2.77444	2	1043.55	-0.362185	24.134	0	C1203	31.43	B1503	0.3228
High	LQQPRSLTY	6	1	1	P22102		0	6.75992e+06	0.008	0.03613	2.66713	2	1105.6	-0.696941	40.2306	0	C1203	51.85	B1503	0.0046
High	AKVSGGPSL	1	1	1	Q9Y262		0	1.5771e+06	0.008	0.03557	2.49232	2	815.462	-0.73069	28.399	0	C1203	44.44	B1503	0.1298
High	GKGSFGEVF	5	2	2	Q9P289;Q9Y6E0		0	1.12925e+07	0.008	0.03285	2.4753	2	927.457	-0.232417	47.0872	0	C1203	37.04	B1503	0.253
High	ETFNTPAmYV	21	7	7	Q9BYX7;P60709;P63261;Q6S8J3;A5A3E0;P0CG38;P0CG39	M8(Oxidation)	0	9.55219e+07	0.008	0.0355	2.41363	2	1188.52	0.120562	60.9713	0	C1203	48.57	A6802	0.0227
High	TTSTITRHTV	1	1	1	Q07954		0	1.28954e+06	0.008	0.03525	2.37133	2	1116.6	-0.0319662	21.4053	0	C1203	42.86	A6802	0.1164
High	YKAFSANKY	2	1	1	O75882		0	6.39269e+06	0.008	0.03334	2.36721	2	1091.55	-0.327936	23.3356	0	C1203	44.44	B1503	0.0652
High	QASPFVLRA	2	1	1	Q9BUE0		0	6.96059e+06	0.008	0.0346	2.36369	2	988.557	-0.0714722	49.5224	0	C1203	55.56	A6802	0.7658
High	SVFGQVERA	3	1	1	Q15233		0	5.50534e+06	0.008	0.03432	2.32535	2	992.516	-0.474322	39.6782	0	C1203	11.11	A6802	0.2015
High	KEYERFSKY	2	2	2	O00148;Q13838		0	1.04619e+07	0.008	0.0341	2.22085	3	1249.62	-0.00189057	23.9877	0	C1203	44.44	B1503	0.0116
High	TVTTVILEV	5	1	1	Q9UKF6		0	5.98442e+07	0.008	0.0344	1.81853	2	974.577	-0.365954	74.4103	0	C1203	48.15	A6802	0.0526
High	KKFASFNAY	6	1	1	Q969S3		0	1.03411e+07	0.009	0.03695	2.67763	2	1075.56	-0.534743	34.1204	0	C1203	40.74	B1503	0.0068
High	GKSGVAITF	4	1	1	Q9BUQ8		0	4.84902e+06	0.009	0.0375	2.67225	2	879.493	-0.040362	46.035	0	C1203	44.44	B1503	0.0385
High	GKRIGVFSY	12	1	1	Q01581		0	3.82142e+07	0.009	0.03748	2.60148	2	1026.57	-0.796901	41.0022	0	C1203	40.74	B1503	0.081
High	NGAPVVRIY	4	1	1	Q96EN8		0	4.02864e+06	0.009	0.04097	2.52336	2	988.557	-0.18484	46.1302	0	C1203	55.56	C1203	0.6056
High	EVVHTPETSV	2	1	1	O15427		0	3.44999e+06	0.009	0.04056	2.4976	2	1097.55	-0.297601	37.1317	0	C1203	25.71	A6802	0.2305
High	KAVGHPFVI	9	1	1	O14980		0	6.3157e+07	0.009	0.03884	2.44849	2	967.572	-0.542928	37.1234	0	C1203	77.78	C1203	0.1068
High	RKIKVSNTL	5	1	1	P36543		0	2.19631e+07	0.009	0.03795	2.43074	2	1058.67	-0.195549	21.3049	0	C1203	40.74	B1503	0.0758
High	KATAYILSV	5	1	1	P01106		0	1.26823e+07	0.009	0.03889	2.42853	2	965.566	-0.32056	52.2836	0	C1203	81.48	C1203	0.2256
High	FAYDGKDYL	6	12	12	P13747;P30462;P18463;Q95365;P30475;Q29836;Q31612;P30504;Q9TNN7;P30505;Q95604;Q29865		0	1.12426e+07	0.009	0.03677	2.37471	2	1091.5	-0.101915	54.677	0	C1203	85.19	C1203	0.0064
High	STAAVFHAV	3	1	1	P57723		0	3.75381e+06	0.009	0.03737	2.25387	2	902.473	0.055176	40.6658	0	C1203	70.37	A6802	0.0033
High	QAYPEVRIV	6	1	1	Q08211		0	2.63813e+07	0.009	0.04064	2.06178	2	1074.59	-0.431513	52.0345	0	C1203	92.59	C1203	0.1422
High	FALPYVIVL	1	1	1	Q8N3Z3		0	1.33654e+07	0.009	0.03863	1.62731	2	1034.63	-0.407821	102.621	0	C1203	96.3	C1203	0.0292
Medium	VKNPDGGSY	2	1	1	Q15646		0	908904	0.01	0.04491	2.67513	2	936.442	-0.440257	22.3676	0	C1203	48.15	B1503	0.0469
Medium	KKKSPASTF	3	1	1	Q86U70		0	1.09505e+06	0.01	0.04262	2.63815	2	993.573	-0.245514	16.7517	0	C1203	37.04	B1503	0.0122
Medium	KQFKSEAY	3	1	1	Q03001		0	1.22846e+06	0.01	0.04255	2.57198	2	1000.51	-0.770106	19.5775	0	C1203	33.33	B1503	0.0268
Medium	AGYQHIRMY	1	1	1	Q9BVC4		0	1.68961e+06	0.01	0.04307	2.57031	2	1138.55	-0.160901	33.5121	0	C1203	51.85	C1203	0.1959
Medium	AKSGVGTAL	3	1	1	P02786		0	3.05047e+06	0.01	0.04453	2.54536	2	803.462	0.0180492	25.7018	0	C1203	48.15	B1503	0.1989
Medium	GKYKFLQKY	3	1	1	P55081		0	2.40459e+06	0.01	0.04509	2.45219	2	1174.66	-0.32748	29.7047	0	C1203	40.74	B1503	0.0375
Medium	YAYLKAIVL	2	2	2	P13056;P49116		0	6.08843e+06	0.01	0.04325	2.44515	2	1053.63	-0.344112	66.6297	0	C1203	88.89	C1203	0.0072
Medium	EIFDGNVAHI	1	1	1	P46939		0	4.30934e+06	0.01	0.04238	2.40866	2	1114.55	0.0921841	58.4389	0	C1203	31.43	A6802	0.0393
Medium	EVYAGNFVEV	1	1	1	Q9UBS4		0	4.21996e+06	0.01	0.04491	2.39978	2	1126.54	-0.225412	68.5927	0	C1203	31.43	A6802	0.0196
Medium	GQKPGGSDF	3	2	2	P56211;O43768		0	2.79177e+07	0.01	0.04558	2.39311	2	892.416	-0.375747	22.1992	0	C1203	37.04	B1503	0.014
Medium	SAYDHVRKT	2	1	1	P27361		0	1.77384e+06	0.01	0.04182	2.34848	2	1076.55	-0.0891068	16.5918	0	C1203	51.85	C1203	0.6615
Medium	MALGHVIVL	5	1	1	Q9NVR2		0	6.4874e+06	0.01	0.04449	2.27971	2	952.565	0.10257	65.6641	0	C1203	88.89	C1203	0.0211
Medium	HQFLQNEY	7	1	1	Q16531		0	1.43895e+07	0.01	0.04284	2.27743	2	1078.49	-0.419775	40.4578	0	C1203	43.33	B1503	0.1513
Medium	GKAFSRSSY	1	3	3	Q8N9K5;Q7L945;P17097		0	1.60526e+06	0.01	0.04203	2.23504	2	1002.5	-0.546476	20.4185	0	C1203	40.74	B1503	0.1169
Medium	GKLPRSPSF	4	1	1	Q9P0N9		0	5.95507e+06	0.01	0.0435	2.20495	2	988.557	-0.441922	32.9276	0	C1203	37.04	B1503	0.0307
Medium	EVYVGDERV	3	1	1	O14976		0	3.37865e+06	0.01	0.04162	2.15203	2	1065.52	-0.22494	39.6692	0	C1203	40.74	A6802	0.042
Medium	YQSPHSGSF	1	1	1	P32004		0	611900	0.01	0.04271	2.10703	2	1009.44	-0.0969271	29.7513	0	C1203	44.44	B1503	0.0029
Medium	RKVPDNQQF	1	1	1	Q9BX10		0	1.97806e+06	0.01	0.04195	2.10501	2	1131.59	-0.0703432	23.3425	0	C1203	37.04	B1503	0.0189
Medium	HTFFIKDSL	1	1	1	Q8NFG4		0	5.13468e+06	0.01	0.0433	2.08739	2	1107.58	-0.165964	49.6714	0	C1203	70.37	A6802	0.0606
Medium	AAAPQLLIV	9	1	1	Q10589		0	2.67708e+07	0.01	0.04471	2.00901	2	895.561	-0.110037	75.597	0	C1203	92.59	C1203	0.2252
Medium	MVAPVWYLV	2	1	1	Q96HY6		0	4.61695e+06	0.01	0.04443	1.92254	2	1077.58	-0.183417	95.5695	0	C1203	48.15	A6802	0.012
Medium	TTVDINTQV	3	1	1	Q14676		0	25984896	0.011	0.04594	2.79604	2	990.509	-1.18171	50.6646	0	C1203	70.37	A6802	0.0027
Medium	GAYGQAVRY	3	1	1	Q9UID3		0	3.95216e+06	0.011	0.04747	2.65404	2	984.489	-0.359393	33.0075	0	C1203	85.19	C1203	0.0963
Medium	LSFPYSYEV	3	1	1	Q53EP0		0	2.41604e+06	0.011	0.04909	2.54987	2	1104.52	-0.436124	76.9291	0	C1203	81.48	A6802	0.1829
Medium	QGFPNRVVF	12	1	1	P35579		0	6.3356e+07	0.011	0.04852	2.50466	2	1063.57	-0.673909	54.8252	0	C1203	48.15	C1203	0.1618
Medium	IKHSGNITF	1	1	1	P30050		0	2.68941e+06	0.011	0.04933	2.49084	2	1016.55	-0.0960182	28.9169	0	C1203	40.74	B1503	0.007
Medium	GKAFSRISY	1	2	2	Q8WV37;Q3KP31		0	3753040	0.011	0.04908	2.40656	2	1028.55	-0.332261	31.6491	0	C1203	44.44	B1503	0.0537
Medium	FKRKDRMSY	1	2	2	P56270;Q9HBE1		0	820311	0.011	0.04931	2.40559	3	1230.64	0.12211	17.9398	0	C1203	40.74	B1503	0.0513
Medium	FAYEGPmYL	6	1	1	Q96MT1	M7(Oxidation)	0	6.86346e+06	0.011	0.04738	2.36346	2	1106.49	-0.745666	71.1271	0	C1203	88.89	C1203	0.0008
Medium	MRYVASYLL	3	1	1	P05387		0	3.96875e+07	0.011	0.04672	2.31738	2	1115.59	-0.189108	61.9631	0	C1203	40.74	C1203	0.8132
Medium	VALDKVIEI	2	1	1	Q9UBT7		0	1.76578e+06	0.011	0.04928	2.14845	2	999.608	-0.207415	64.7415	0	C1203	85.19	C1203	0.0535
Medium	EILNIFQGV	3	1	1	Q9H0H0		0	7.34014e+06	0.011	0.0467	2.11652	2	1032.57	-0.15309	88.4752	0	C1203	37.04	A6802	0.0751
Medium	FTPAVHASL	2	1	1	P69905		0	6.27012e+06	0.011	0.04799	2.06782	2	942.504	-0.388769	46.399	0	C1203	70.37	A6802	0.0853
Medium	SAYAQIVQF	2	1	1	Q9Y4W6		0	1.30557e+07	0.011	0.04931	1.95097	2	1026.53	-0.0614464	69.8391	0	C1203	77.78	C1203	0.0098
Medium	ETADVIAKV	21	1	1	O43617		0	588900796	0.011	0.04798	1.84039	2	945.525	-0.190711	42.2315	0	C1203	77.78	A6802	0.0012
Medium	ISTPVIRTF	1	1	1	Q9NZB2		0	3.31771e+07	0.011	0.04803	1.67362	2	1033.6	-0.638685	55.4848	0	C1203	77.78	C1203	0.0735
Medium	VKLGPAKSY	2	1	1	Q8ND04		0	1.30605e+06	0.012	0.05114	3.17492	2	962.567	-0.421146	26.6533	0	C1203	48.15	B1503	0.0253
Medium	RKEETVTVY	1	1	1	Q9BZX2		0	4.86962e+06	0.012	0.05077	2.75849	2	1124.59	-0.542027	26.1017	0	C1203	48.15	B1503	0.0125
Medium	AMASIINRL	1	1	1	Q96N67		0	1.86945e+06	0.012	0.05098	2.72988	2	988.561	0.0286776	55.0892	0	C1203	51.85	C1203	0.6876
Medium	RKEERRITY	1	1	1	Q14152		0	2.17111e+06	0.012	0.04943	2.71651	3	1250.7	-0.192017	17.4077	0	C1203	48.15	B1503	0.0471
Medium	KKIEDNNTL	8	1	1	P62750		0	3.19966e+07	0.012	0.04962	2.69883	2	1074.58	-0.3261	20.6237	0	C1203	44.44	B1503	0.2575
Medium	EVAGmLIGL	5	1	1	Q16850	M5(Oxidation)	0	1.66892e+07	0.012	0.05064	2.65313	2	918.496	-0.108629	74.7591	0	C1203	48.15	A6802	0.0084
Medium	GKNFSKNIF	1	1	1	Q6P1J9		0	5.07758e+06	0.012	0.05005	2.53162	2	1054.57	-0.125746	33.3634	0	C1203	29.63	B1503	0.2358
Medium	ETIGTGGFAKV	5	1	1	Q14680		0	2.11832e+07	0.012	0.04964	2.49048	2	1079.57	-0.492663	46.5661	0		0	A6802	0.2563
Medium	AKPEYISKTY	1	1	1	Q13823		0	2.12482e+06	0.012	0.05023	2.48697	3	1199.63	-0.111256	28.3585	0	C1203	31.43	B1503	0.4421
Medium	KATNVVRLL	4	1	1	Q9NYU1		0	43110661	0.012	0.04937	2.47542	2	1013.65	-1.25191	38.1516	0	C1203	81.48	C1203	0.229
Medium	AQKPFGATY	5	1	1	Q96QD5		0	8.44252e+06	0.012	0.05063	2.43077	2	982.498	-1.21815	35.0805	0	C1203	51.85	B1503	0.0009
Medium	AKFDGILGM	2	1	1	P07339		0	2.75997e+06	0.012	0.05026	2.33289	2	951.497	-0.264499	62.5098	0	C1203	48.15	B1503	0.0166
Medium	AQLPEKVEY	2	1	1	P51532		0	5.5861e+06	0.012	0.05044	2.32883	2	1076.56	-0.328874	42.4315	0	C1203	55.56	B1503	0.006
Medium	ELYYRAIQF	6	1	1	Q00610		0	7.61055e+06	0.012	0.04944	2.31477	2	1202.62	-0.449564	63.8309	0	C1203	37.04	B1503	1.1276
Medium	STIGIHPVC	6	1	1	Q16881		0	2.16745e+07	0.012	0.0495	2.28911	2	926.476	-0.223872	45.2891	0	C1203	37.04	A6802	1.7333
Medium	SLAEVLQQL	1	1	1	Q6NUM9		0	5.7614e+06	0.012	0.05107	2.2722	2	1000.57	-0.377921	54.0863	0	C1203	44.44	C1203	0.3628
Medium	RKVYNISEF	6	1	1	O60427		0	2.05843e+07	0.012	0.05113	2.25376	2	1155.62	-0.168902	39.0639	0	C1203	37.04	B1503	0.0143
Medium	AKLIAVEIY	5	1	1	Q14008		0	3.25065e+06	0.012	0.04939	2.24385	2	1019.61	-0.327071	60.7225	0	C1203	44.44	B1503	0.1481
Medium	RQHFSPLSL	3	1	1	O75179		0	5.97474e+06	0.012	0.04967	2.23923	2	1084.59	-0.404054	44.0114	0	C1203	44.44	B1503	0.0387
Medium	SVFGFSFKL	3	1	1	P26639		0	8.65496e+06	0.012	0.04972	2.23489	2	1031.56	0.223655	78.9507	0	C1203	44.44	A6802	0.0365
Medium	KAPDFVFYA	5	3	3	P15311;P26038;P35241		0	1.00173e+07	0.012	0.05108	2.12724	2	1057.53	-0.832004	61.7975	0	C1203	44.44	A6802	0.6386
Medium	RKYGKSLYY	1	2	2	P07355;A6NMY6		0	3.53641e+06	0.012	0.0508	2.09894	2	1177.64	-0.544747	23.2794	0	C1203	48.15	B1503	0.005
Medium	AALTFPVLF	5	1	1	Q05D32		0	1.40825e+07	0.012	0.05086	1.9961	2	978.566	-0.339214	98.8883	0	C1203	77.78	C1203	0.3503
Medium	ITFPGIKLI	2	1	1	O75387		0	4.4243e+06	0.012	0.05039	1.94677	2	1001.64	-0.405985	76.7117	0	C1203	77.78	C1203	0.1062
Medium	KVPPFTFHV	15	1	1	Q6NZI2		0	39175333	0.012	0.05024	1.88705	2	1071.6	-0.51441	52.4256	0	C1203	44.44	A6802	0.1402
Medium	GKKGPQSLF	5	1	1	P46087		0	1.88401e+07	0.013	0.05157	2.77511	2	961.546	-0.480641	30.2992	0	C1203	33.33	B1503	0.2266
Medium	KRFEPGTQRF	1	1	1	Q70IA8		0	1.78192e+06	0.013	0.05173	2.75658	3	1265.67	-0.241016	25.2112	0	C1203	45.71	B1503	0.0815
Medium	FKNPIIEKY	1	1	1	P00973		0	2.15167e+06	0.013	0.05163	2.72265	2	1151.65	-0.670432	42.5181	0	C1203	51.85	B1503	0.0386
Medium	SKDKRDVYY	3	1	1	Q9UET6		0	1.30189e+06	0.013	0.0518	2.59897	2	1173.59	0.20807	19.0449	0	C1203	40.74	B1503	0.5598
Medium	AAYYHPSYL	3	1	1	Q14687		0	1.15073e+07	0.013	0.0513	2.50536	2	1084.51	-0.232563	46.8469	0	C1203	85.19	C1203	0.0061
Medium	KKAQAQPVM	1	1	1	P24539		0	500125	0.013	0.05126	2.45085	2	1000.56	-0.276671	18.3899	0	C1203	37.04	B1503	0.1202
Medium	KKKEKDVQF	3	1	1	Q92544		0	1.45871e+06	0.013	0.05143	2.33668	2	1149.66	-0.570947	16.4299	0	C1203	37.04	B1503	0.1047
Medium	RLFKDQLVY	7	1	1	Q9Y3I1		0	1.43518e+07	0.013	0.05231	2.25903	2	1181.67	-0.61059	46.7156	0	C1203	48.15	B1503	0.0181
Medium	AKAGITTTL	3	1	1	P33992		0	5.17237e+06	0.013	0.05127	2.24637	2	875.52	-0.000435099	35.2739	0	C1203	51.85	B1503	0.1159
Medium	ELIERIPEL	1	1	1	P02786		0	1.75206e+06	0.013	0.05162	2.10739	2	1111.64	-0.348788	65.3362	0	C1203	48.15	A6802	0.0951
Medium	EVADFLIKA	6	2	2	Q8IWZ3;O75179		0	4.02559e+07	0.013	0.05126	2.06917	2	1005.56	-0.010207	61.7446	0	C1203	11.11	A6802	0.0079
Medium	RTALPRIF	4	1	1	Q03518		0	1.19378e+07	0.013	0.05203	2.04218	2	973.594	-0.612994	47.2071	0	C1203	63.33	C1203	3.1715
Medium	GKLVALHTF	1	1	1	Q6SJ93		0	768682	0.013	0.05295	1.96405	2	985.583	-0.410082	41.6992	0	C1203	33.33	B1503	0.1761
Medium	YAFPRVRII	3	1	1	Q9NWZ5		0	2.16536e+07	0.013	0.05119	1.21914	2	1134.68	-0.323665	57.0945	0	C1203	88.89	C1203	0.0061
Medium	RQIGSRSY	1	1	1	P51114		0	7.36228e+06	0.014	0.05636	2.58042	2	966.511	-0.250589	18.345	0	C1203	30	B1503	0.0166
Medium	DTFRGVAFV	6	1	1	O15067		0	5.76884e+07	0.014	0.05934	2.57223	2	1011.53	-0.418256	62.5326	0	C1203	74.07	A6802	0.0107
Medium	DLSSVISKI	6	1	1	Q6PL18		0	6.36624e+06	0.014	0.05706	2.56153	2	961.557	0.0247705	69.6979	0	C1203	40.74	A6802	0.5587
Medium	TAFSRLILI	1	1	1	Q6P2Q9		0	8.3611e+06	0.014	0.05794	2.55215	2	1033.64	-0.533187	72.4263	0	C1203	77.78	C1203	0.1119
Medium	HAIDRVTTSV	4	1	1	Q9BTT6		0	5.46085e+06	0.014	0.05344	2.53345	2	1098.59	-0.0963149	29.9828	0	C1203	60	A6802	0.0587
Medium	DVATITKTVV	1	1	1	P57740		0	1.61586e+06	0.014	0.05638	2.46344	2	1046.61	-0.536135	53.4376	0	C1203	31.43	A6802	0.3213
Medium	TIPDFIFANV	3	1	1	P61073		0	6.94542e+06	0.014	0.0573	2.45971	2	1136.6	-0.439179	93.7074	0	C1203	28.57	A6802	0.1469
Medium	YKAPILLAL	2	1	1	O60341		0	2.28094e+06	0.014	0.05626	2.45199	2	1001.64	0.0305455	71.2014	0	C1203	55.56	B1503	0.1787
Medium	RKDPNAEGRY	1	1	1	Q8N9N2		0	322104	0.014	0.05802	2.44096	3	1205.6	-0.104816	16.2627	0	C1203	31.43	B1503	1.1362
Medium	NIPSFIVRL	4	1	1	P46781		0	1.12694e+07	0.014	0.05496	2.41228	2	1058.64	-0.646054	72.2404	0	C1203	48.15	A6802	0.1038
Medium	GKIRKDLKY	1	1	1	Q2TAY7		0	4.00106e+06	0.014	0.05644	2.34687	2	1120.68	-0.207036	18.9925	0	C1203	40.74	B1503	0.2952
Medium	DSSEIHFKV	5	1	1	P63165		0	1.56467e+07	0.014	0.05553	2.309	2	1061.53	-0.641535	42.2711	0	C1203	74.07	A6802	0.0528
Medium	EVFGLVQQL	1	1	1	O75592		0	1.27313e+06	0.014	0.05707	2.30517	2	1032.57	-0.271309	79.9993	0	C1203	48.15	A6802	0.0288
Medium	GQFPGHNEF	4	1	1	Q9UKI2		0	2.29543e+07	0.014	0.05811	2.29663	2	1032.45	-0.585898	39.6124	0	C1203	44.44	B1503	0.0015
Medium	SVSAVIVRA	6	1	1	Q68CR1		0	1.06826e+07	0.014	0.05931	2.28908	2	901.546	-0.309527	40.2964	0	C1203	11.11	A6802	0.1134
Medium	TASPLVKSV	5	1	1	Q6P4F7		0	1.10638e+07	0.014	0.05619	2.26829	2	901.535	-0.502063	35.2175	0	C1203	92.59	A6802	0.2616
Medium	SVFEEVFKL	4	1	1	Q8TEX9		0	6.54096e+06	0.014	0.05807	2.21301	2	1097.59	-0.311007	77.844	0	C1203	48.15	A6802	0.0357
Medium	RLWEQLVHF	2	1	1	Q5JS54		0	2.54394e+07	0.014	0.05477	2.14035	2	1227.66	-0.276814	64.6911	0	C1203	37.04	B1503	0.158
Medium	QTYGYEHIL	1	1	1	Q96AX1		0	4.91179e+06	0.014	0.05834	2.10343	2	1123.54	-0.81897	50.8323	0	C1203	74.07	A6802	0.1803
Medium	RKLDPPGGQF	1	1	1	O95400		0	825453	0.014	0.05761	2.08003	2	1114.6	-0.147115	33.2567	0	C1203	42.86	B1503	0.1684
Medium	RSYPYAFSV	2	1	1	Q5H9F3		0	1.97881e+07	0.014	0.05378	1.99639	2	1089.54	-0.753753	53.8381	0	C1203	77.78	C1203	0.032
Medium	ETTSISKITV	1	1	1	P51587		0	4.73015e+06	0.014	0.05419	1.98161	2	1078.6	-0.588754	44.6006	0	C1203	40	A6802	0.1046
Medium	LTVPFARYL	8	2	2	P12081;P49590		0	9.40683e+06	0.014	0.05365	1.65042	2	1079.63	0.200346	73.6611	0	C1203	77.78	C1203	0.1659
Medium	KKLSSPSNY	2	1	1	Q13325		0	995874	0.015	0.06578	3.12297	2	1023.55	-0.0378109	19.6639	0	C1203	44.44	B1503	0.0581
Medium	GKRPGGSTF	4	1	1	O15399		0	4.18383e+06	0.015	0.06621	2.95617	2	906.479	-0.276708	18.1759	0	C1203	40.74	B1503	0.0145
Medium	GKAFSLRSY	3	1	1	Q8NF99		0	10070412	0.015	0.06389	2.75104	2	1028.55	-0.688307	31.2394	0	C1203	44.44	B1503	0.0661
Medium	EVFPEFAAA	1	1	1	O15294		0	4.27411e+06	0.015	0.05978	2.73817	2	980.472	-0.0332768	72.2427	0	C1203	11.11	A6802	0.0163
Medium	GKTKEGVLY	2	1	1	P37840		0	1.46777e+06	0.015	0.06505	2.70268	2	994.556	-0.491965	23.2127	0	C1203	40.74	B1503	0.3325
Medium	EIFSRGPYSV	3	1	1	Q7LBC6		0	6.85185e+06	0.015	0.06139	2.6942	2	1154.58	0.16007	52.6181	0	C1203	40	A6802	0.1114
Medium	LKKDDSVGY	3	1	1	Q8N766		0	1.37753e+06	0.015	0.06105	2.65423	2	1024.53	-0.41592	21.9885	0	C1203	44.44	B1503	0.1583
Medium	EIYSESHRV	4	1	1	Q96I51		0	3.76535e+06	0.015	0.06419	2.64525	2	1119.54	-0.260072	24.562	0	C1203	44.44	A6802	0.0266
Medium	KLNGQVLVF	5	1	1	Q15459		0	9.09503e+06	0.015	0.06232	2.58045	2	1017.61	-0.61241	57.1365	0	C1203	44.44	B1503	0.0678
Medium	GKPGHLQFY	1	1	1	Q8IWA0		0	2.33982e+06	0.015	0.0654	2.42025	2	1046.54	-0.374438	33.5474	0	C1203	40.74	B1503	0.7703
Medium	GVYGDVHRV	1	1	1	O95758		0	1.3972e+06	0.015	0.05991	2.27216	2	1001.52	-0.789575	27.223	0	C1203	48.15	A6802	0.1501
Medium	YAVDRAITH	1	1	1	P14866		0	0	0.015	0.06565	2.25214	2	1045.54	-2.00703	29.3978	0	C1203	51.85	C1203	0.5525
Medium	EAVSVIQSI	7	1	1	Q9P035		0	8.71904e+06	0.015	0.06317	2.18421	2	945.525	-0.051032	64.5161	0	C1203	74.07	A6802	0.0782
Medium	KKVFLGRDTY	2	1	1	P08243		0	3.36411e+06	0.015	0.063	2.17568	3	1226.69	-0.139619	27.3866	0	C1203	28.57	B1503	0.2792
Medium	RAFGIPIRVY	1	1	1	P06493		0	2.20269e+06	0.015	0.0637	2.12945	2	1191.7	-0.0912481	56.0518	0	C1203	77.14	B1503	0.1646
Medium	IAVNAVLTV	3	1	1	P48643		0	6.7988e+06	0.015	0.06501	2.03596	2	899.556	-0.150628	71.3533	0	C1203	85.19	C1203	0.0444
Medium	RTFPWIIEV	2	1	1	P28749		0	5.91618e+06	0.015	0.06473	2.00697	2	1160.65	0.0849556	78.8736	0	C1203	88.89	C1203	0.0297
Medium	EVSEIHIKV	6	1	1	P30414		0	6.88662e+06	0.015	0.06198	1.99591	2	1053.59	-0.242761	41.1965	0	C1203	48.15	A6802	0.0039
Medium	TVARPSVPA	5	1	1	P08174		0	1.78821e+08	0.015	0.06618	1.95486	2	897.514	-0.935254	31.3206	0	C1203	7.41	A6802	0.2629
Medium	DTFSVQVLV	4	1	1	Q96L33		0	2.26636e+07	0.015	0.06459	1.91052	2	1007.54	-0.557331	85.2158	0	C1203	77.78	A6802	0.0147
Medium	SIEGVTHAL	2	1	1	P07814		0	3.44759e+06	0.015	0.06037	1.7953	2	926.494	-0.617805	43.1424	0	C1203	40.74	A6802	0.4333
Medium	TVVEIILQA	6	1	1	P38935		0	3.72502e+06	0.016	0.06726	2.5154	2	985.592	-0.670272	80.3814	0	C1203	11.11	A6802	0.0406
Medium	YLGEFSITY	1	1	1	P62841		0	3.00979e+06	0.016	0.07197	2.47577	2	1092.52	0.117748	77.7372	0	C1203	51.85	B1503	0.131
Medium	KKIRDTQKY	1	1	1	Q9GZR2		0	685512	0.016	0.07042	2.42093	2	1179.68	-0.289628	15.7756	0	C1203	37.04	B1503	0.0807
Medium	RQAKEERTF	2	1	1	P35579		0	695864	0.016	0.06745	2.39851	2	1164.61	-0.160822	16.4911	0	C1203	40.74	B1503	0.0065
Medium	ETFSSYISV	3	1	1	A5PLN9		0	1.4047e+07	0.016	0.06953	2.3283	2	1032.49	-0.345371	70.0591	0	C1203	77.78	A6802	0.0049
Medium	LSADIFQQV	7	1	1	O94916		0	1.40181e+07	0.016	0.07318	2.23803	2	1020.54	-0.082304	73.6244	0	C1203	74.07	A6802	0.0684
Medium	RALIQQMSPSAF	1	1	1	Q96G74		0	1.08749e+07	0.016	0.07009	2.05743	3	1348.7	-2.73311	52.5421	0		0	B1503	1.5277
Medium	GQWKSITLF	2	1	1	P07996		0	2.40116e+06	0.016	0.07081	1.86125	2	1079.59	-0.0229671	65.649	0	C1203	33.33	B1503	0.0162
Medium	HKIEAGNEF	2	1	1	O43293		0	8.84096e+06	0.017	0.07428	2.6069	2	1044.51	-0.486089	25.7705	0	C1203	37.04	B1503	0.0147
Medium	SKRTGVQTF	1	1	1	P53621		0	9.40866e+06	0.017	0.08299	2.51172	2	1023.56	-0.533935	21.1575	0	C1203	37.04	B1503	0.0122
Medium	LSKDGVLYV	4	1	1	Q9H1A4		0	8.09012e+06	0.017	0.08444	2.44787	2	993.561	-0.727369	49.0068	0	C1203	77.78	C1203	0.3348
Medium	SAHSKVVIF	5	1	1	Q8IX04		0	6.34694e+06	0.017	0.07508	2.40618	2	987.562	-0.0505408	34.4187	0	C1203	77.78	C1203	0.0602
Medium	MTADSRSQV	5	1	1	P60900		0	4.18049e+06	0.017	0.07641	2.39001	2	994.462	-0.311363	21.9094	0	C1203	74.07	A6802	0.0169
Medium	KQHVTEAF	2	1	1	O43175		0	1.52528e+06	0.017	0.07752	2.38861	2	959.494	-0.367982	22.7403	0	C1203	30	B1503	0.1325
Medium	SVYPNGHFV	2	1	1	Q8TF46		0	1.02241e+07	0.017	0.07424	2.33987	2	1019.49	0.142428	44.2122	0	C1203	48.15	A6802	0.0121
Medium	DVIYPmAVV	2	1	1	P78406	M6(Oxidation)	0	4.20794e+06	0.017	0.07394	2.29388	2	1022.52	-0.0534543	75.5737	0	C1203	40.74	A6802	0.0294
Medium	RQIPLAVLF	3	1	1	P04920		0	7.00452e+06	0.017	0.08282	2.23552	2	1056.66	-0.289377	73.583	0	C1203	40.74	B1503	0.0057
Medium	HVIEKMHHV	1	1	1	Q9BYX4		0	1.06225e+06	0.017	0.07781	2.17653	2	1129.59	0.109976	18.4131	0	C1203	40.74	A6802	0.0063
Medium	EVARIQLQI	2	1	1	O75694		0	2.81093e+06	0.017	0.08369	2.04545	2	1069.64	-0.294776	58.163	0	C1203	37.04	A6802	0.0553
Medium	RKIFPSVIKY	1	1	1	Q8IWV7		0	3.65414e+06	0.017	0.08281	1.97477	3	1250.76	-0.271795	41.9968	0	C1203	34.29	B1503	0.065
Medium	KKVEKSKIF	1	1	1	Q9NVP1		0	646102	0.017	0.08507	1.94628	2	1106.69	0.0213279	18.0487	0	C1203	37.04	B1503	0.0682
Medium	RKHGVVPLATY	2	1	1	P46778		0	4.31782e+06	0.017	0.08161	1.83818	3	1240.72	-0.0594251	32.0432	0		0	B1503	0.4465
Medium	ETQKSIYYI	2	1	1	P08238		0	1.90874e+07	0.017	0.08473	1.77074	2	1144.59	-0.474473	47.9369	0	C1203	62.96	A6802	0.058
Medium	IAFSRPVKY	1	1	1	Q99759		0	4.84223e+06	0.018	0.09199	2.76143	2	1080.62	-0.487559	38.0911	0	C1203	88.89	C1203	0.008
Medium	RKHGLEVIY	3	1	1	P07900		0	4.69172e+06	0.018	0.08687	2.70008	2	1114.64	-0.241417	29.9034	0	C1203	44.44	B1503	0.0281
Medium	AKHTNFVEF	3	1	1	P53680		0	1.07394e+07	0.018	0.08811	2.66353	2	1092.55	-0.467505	37.6656	0	C1203	40.74	B1503	0.0305
Medium	TTFESSHYLL	1	1	1	Q16531		0	3.93917e+06	0.018	0.09216	2.49412	2	1197.58	-0.297793	55.2552	0	C1203	54.29	A6802	0.0976
Medium	EVFASLFHKV	1	1	1	Q27J81		0	1.65854e+06	0.018	0.08518	2.35408	2	1176.64	-0.258839	57.2993	0	C1203	31.43	A6802	0.125
Medium	KVANIIAEV	2	1	1	P52306		0	6.31685e+06	0.018	0.08901	2.34384	2	956.577	-0.764679	49.9315	0	C1203	48.15	A6802	0.0455
Medium	EISRIFHYI	2	1	1	Q96EK7		0	7.96957e+06	0.018	0.08949	2.20622	2	1177.64	-0.0434448	56.8273	0	C1203	33.33	A6802	0.0377
Medium	TVFNFPVSI	2	1	1	P28562		0	2.65934e+06	0.018	0.08772	2.14711	2	1023.55	-0.884054	89.3385	0	C1203	40.74	A6802	0.0165
Medium	EIADLNVRI	4	1	1	Q6KB66		0	6.51407e+06	0.018	0.08801	2.12232	2	1042.59	-0.0310507	59.8151	0	C1203	40.74	A6802	0.0095
Medium	SVFPGARLL	3	1	1	Q86X55		0	6.96057e+06	0.018	0.09012	2.02286	2	959.567	-0.15114	61.074	0	C1203	51.85	C1203	0.0065
Medium	RKFPGRPEEEY	1	1	1	Q9NUQ8		0	8.06916e+06	0.018	0.09021	1.72487	3	1407.7	-0.367509	26.7813	0		0	B1503	0.2524
Medium	RKDGSFIVRY	2	1	1	Q6UW63		0	3.05453e+06	0.019	0.09588	3.00211	3	1240.68	-0.106166	32.4563	0	C1203	31.43	B1503	0.4334
Medium	EALNVIVRL	1	1	1	Q5UIP0		0	6.75793e+06	0.019	0.09646	2.09548	2	1026.63	-0.355218	64.906	0	C1203	81.48	A6802	0.2042
Medium	NTIPLFVQL	2	2	2	P35222;P14923		0	4.47987e+07	0.019	0.09528	2.08977	2	1044.61	-0.154243	90.3412	0	C1203	77.78	A6802	0.0126
Medium	DVAQIIIRI	4	1	1	Q7L622		0	7.76721e+07	0.019	0.09607	1.99396	2	1040.65	-0.374458	74.9349	0	C1203	40.74	A6802	0.0471
Medium	EVFSSFAHA	4	1	1	O60502		0	1.97023e+07	0.019	0.09412	1.92367	2	994.463	-0.0956763	49.2661	0	C1203	7.41	A6802	0.035
Medium	YKIYPGHGRRY	1	1	1	P83731		0	5.57108e+06	0.019	0.09519	1.07486	3	1409.74	-0.183682	21.769	0		0	B1503	1.1484
Medium	GKNLYTNEY	2	3	3	Q9HCP0;P78368;Q9Y6M4		0	1.1332e+06	0.02	0.09877	2.50546	2	1101.52	-0.190353	33.1637	0	C1203	40.74	B1503	0.0801
Medium	EISSILKEL	2	1	1	Q9Y4F5		0	6.25971e+06	0.02	0.09706	2.42937	2	1031.6	-0.62762	68.0947	0	C1203	51.85	A6802	0.2228
Medium	TTADPFVKV	2	1	1	Q8IV01		0	5888754	0.02	0.09934	2.37523	2	977.53	-0.136435	47.2859	0	C1203	77.78	A6802	0.0025
Medium	RQLPAMTAL	3	1	1	Q13045		0	8.98288e+06	0.02	0.0978	2.19324	2	1000.56	-0.642677	49.6783	0	C1203	44.44	B1503	0.0154
Medium	QAFLVSLYKF	1	1	1	Q03989		0	7.75384e+06	0.02	0.09818	2.11659	3	1215.68	-0.135035	33.8262	0	C1203	65.71	C1203	6.3604
Medium	SAVPFLILV	1	1	1	Q8NA29		0	1.42984e+06	0.02	0.09669	1.93044	2	958.597	-0.207426	101.021	0	C1203	85.19	A6802	0.0598
Medium	EVMKYITSL	3	1	1	P11586		0	9.82327e+06	0.02	0.09779	1.80206	2	1083.58	-0.351115	60.2855	0	C1203	40.74	A6802	0.0231
Medium	VVYPWTQRF	3	5	5	P68871;P02042;P02100;P69891;P69892		0	5.57481e+06	0.02	0.09754	1.7637	2	1195.63	-0.399364	62.109	0	C1203	44.44	C1203	0.0195
Medium	ETSPVLQKL	2	1	1	Q9NRR4		0	3.41178e+07	0.02	0.09693	1.72064	2	1014.58	-0.337183	45.2545	0	C1203	77.78	A6802	0.0343
Medium	SKFGTGNKY	1	1	1	P14735		0	1.23226e+06	0.021	0.1001	2.59914	2	1001.51	0.195029	19.8428	0	C1203	44.44	B1503	0.014
Medium	IQRTPKIQVY	2	1	1	P61769		0	5.32999e+06	0.021	0.09978	2.17799	2	1245.73	0.0574853	36.9918	0	C1203	42.86	B1503	0.0313
Medium	HSVYITSRV	3	1	1	Q8N961		0	2.90225e+06	0.021	0.1003	2.15032	2	1061.57	-0.519525	29.7714	0	C1203	66.67	A6802	0.052
Medium	KAVHVIYTV	2	1	1	P61073		0	3.63715e+06	0.021	0.1006	2.11894	2	1029.61	-0.111608	35.1988	0	C1203	81.48	C1203	0.2216
Medium	EVIGKGPFSV	1	1	1	O14936		0	3.41758e+06	0.021	0.1007	2.07027	2	1032.57	-0.872093	54.3229	0	C1203	34.29	A6802	0.0362
Medium	GKAPNILLY	4	1	1	P50747		0	6.09929e+06	0.021	0.09983	2.02497	2	988.583	0.305529	54.051	0	C1203	55.56	B1503	0.0213
Medium	KQIDRQLTAY	1	1	1	Q14204		0	4.31338e+06	0.021	0.1004	2.01913	3	1235.67	-0.281199	31.0203	0	C1203	34.29	B1503	0.0091
Medium	RTYPVEILY	2	1	1	Q14562		0	6.67389e+06	0.021	0.09973	1.76469	2	1153.63	-0.141902	59.4599	0	C1203	81.48	C1203	0.0382
Medium	AATPAVRTV	1	2	2	P11940;Q9H361		0	3.08136e+07	0.021	0.1004	1.70005	2	885.515	-0.258666	29.6376	0	C1203	96.3	C1203	0.1137
Medium	EVSKIIKRA	3	1	1	O60502		0	5.72107e+06	0.021	0.1004	1.56748	2	1043.66	-0.0567323	20.3348	0	C1203	11.11	A6802	0.5574
Medium	KTASINQNV	4	1	1	Q8NI77		0	2.47071e+06	0.022	0.1015	2.51598	2	974.526	-0.473758	24.1271	0	C1203	74.07	A6802	0.1703
Medium	HVVDFFNRI	1	2	2	Q86TA1;Q70IA8		0	1.74792e+06	0.022	0.1013	2.28966	2	1146.61	-0.1998	55.9319	0	C1203	33.33	A6802	0.0175
Medium	KKPELVISY	1	1	1	P78347		0	2.77911e+06	0.022	0.101	2.21296	2	1076.63	-0.457181	41.5177	0	C1203	48.15	B1503	0.0295
Medium	NASPVISSV	2	1	1	Q96T58		0	1.57922e+07	0.022	0.1015	2.18491	2	873.468	0.0431223	47.8628	0	C1203	88.89	A6802	0.01
Medium	EVDPNIQAV	1	1	1	P05787		0	5.51193e+06	0.022	0.1012	2.16219	2	984.5	-0.0822218	52.325	0	C1203	48.15	A6802	0.031
Medium	AKFGSKEEY	2	1	1	Q5VWQ8		0	2.35947e+06	0.022	0.1014	2.1324	2	1058.52	-0.263627	21.5306	0	C1203	51.85	B1503	0.0236
Medium	mAAAWPLLL	2	1	1	P15151	M1(Oxidation)	0	1.1149e+07	0.022	0.1011	2.12273	2	1001.55	-0.162395	93.111	0	C1203	85.19	C1203	0.0433
Medium	ESSPFVERL	6	1	1	P14625		0	7.12792e+07	0.022	0.1014	1.90181	2	1063.54	-1.47667	50.3003	0	C1203	81.48	A6802	0.1754
Medium	SKIVIVMEY	1	1	1	Q9H093		0	2.57822e+06	0.023	0.102	2.53958	2	1081.6	-0.114983	58.1209	0	C1203	44.44	B1503	0.1027
Medium	KAYSHPRSL	1	1	1	Q9BUY5		0	1.26653e+06	0.023	0.1017	2.47468	2	1058.57	-0.496236	17.9177	0	C1203	88.89	C1203	0.0043
Medium	RKHEHVGSF	1	1	1	Q14241		0	346320	0.023	0.102	2.44179	2	1096.56	0.0488474	16.766	0	C1203	37.04	B1503	0.0072
Medium	HAIKSVKIY	3	1	1	P53618		0	6.84016e+06	0.023	0.1015	2.34081	2	1058.64	-0.281234	26.1955	0	C1203	81.48	B1503	0.2246
Medium	SKMFHPNVY	2	2	2	P49459;P63146		0	2.23638e+06	0.023	0.1016	2.26202	2	1122.54	0.41303	34.713	0	C1203	44.44	B1503	0.0085
Medium	ETFKNSFVEA	6	1	1	Q6NUM9		0	1.79212e+07	0.023	0.1021	2.23802	2	1171.56	-0.20448	46.5137	0	C1203	25.71	A6802	0.2715
Medium	EVFQGVEKL	6	1	1	Q9Y330		0	1.19857e+07	0.023	0.1023	2.2094	2	1048.57	-1.24328	51.3191	0	C1203	44.44	A6802	0.0422
Medium	TSTDLLFHL	1	1	1	Q14181		0	1.51026e+06	0.023	0.1022	2.19226	2	1046.55	-0.269552	71.5447	0	C1203	70.37	A6802	0.4531
Medium	HTFHGNFFV	1	2	2	O95486;O95487		0	4.70656e+06	0.023	0.1019	2.19203	2	1105.52	-0.231146	45.5079	0	C1203	70.37	A6802	0.0048
Medium	RSSPPGHYY	1	1	1	Q9NX40		0	2.78584e+06	0.023	0.1022	2.16861	2	1063.5	-0.0472995	21.6797	0	C1203	77.78	C1203	0.1025
Medium	KAIDVVVmV	2	1	1	Q8TDR0	M8(Oxidation)	0	4.73039e+06	0.023	0.102	2.15271	2	989.569	-0.731428	52.6795	0	C1203	85.19	C1203	0.0436
Medium	EIAAVIETV	2	1	1	Q7Z4G1		0	2.49098e+07	0.023	0.1016	2.12954	2	944.53	-0.179539	67.9989	0	C1203	48.15	A6802	0.0047
Medium	HSAEILAEI	1	1	1	Q6FI81		0	2.01854e+08	0.023	0.1021	1.73009	2	982.52	0.00207725	53.7077	0	C1203	70.37	A6802	0.018
Medium	NAFHHPSAV	1	1	1	P32314		0	953459	0.024	0.1025	2.48933	2	979.474	-0.246635	23.3495	0	C1203	81.48	A6802	0.0977
Medium	TTSHLHQAV	1	1	1	P22695		0	1.50855e+06	0.024	0.1027	2.36613	2	993.511	-0.270161	18.3373	0	C1203	70.37	A6802	0.0974
Medium	RQLNLITRF	1	1	1	Q86WI3		0	5.47597e+06	0.024	0.1025	2.33529	2	1160.69	-0.345119	47.5621	0	C1203	33.33	B1503	0.0054
Medium	ESLNIIINV	1	1	1	Q96NE9		0	1.11653e+07	0.024	0.103	2.27436	2	1014.58	-0.156709	81.1896	0	C1203	74.07	A6802	0.0281
Medium	VKAELRQYF	2	1	1	P30153		0	3.18581e+06	0.024	0.1025	2.27215	2	1153.64	-1.11115	42.2991	0	C1203	40.74	B1503	0.0365
Medium	YAQVmRTV	1	1	1	Q9NNW7	M5(Oxidation)	0	1.01182e+06	0.024	0.1024	2.11985	2	983.498	-0.253252	29.8697	0	C1203	80	C1203	3.4822
Medium	EVISGKQEGV	1	2	2	Q9Y227;Q9NQZ7		0	2.0968e+06	0.024	0.1039	2.117	2	1045.55	0.647394	29.4872	0	C1203	28.57	A6802	0.1576
Medium	RKSLNSIEF	2	1	1	P78527		0	3.20348e+07	0.024	0.1025	2.09617	2	1093.6	-0.834499	36.8492	0	C1203	40.74	B1503	0.0352
Medium	FSAGEPRVL	1	1	1	Q9BRA0		0	5.04917e+06	0.024	0.1024	2.02888	2	975.525	-0.496257	45.1986	0	C1203	88.89	C1203	0.1714
Medium	LAAPVISVL	1	1	1	O60337		0	5.35387e+06	0.024	0.1029	1.90441	2	882.566	-0.0994858	80.3859	0	C1203	92.59	C1203	0.0085
Medium	RALALVVTL	2	1	1	O00622		0	6.74106e+07	0.024	0.1026	1.85965	2	955.629	-0.575752	65.5081	0	C1203	85.19	C1203	0.0638
Medium	NVYEYVRKY	1	1	1	O95071		0	1.37463e+06	0.024	0.104	1.59888	3	1233.63	-0.203129	40.0621	0	C1203	51.85	C1203	0.1096
Medium	EIFPVSFHV	2	1	1	Q5THK1		0	1.6647e+07	0.024	0.1036	1.50164	2	1074.56	-0.307347	73.7095	0	C1203	48.15	A6802	0.0055
Medium	YKIKYPENF	1	3	3	P62136;P62140;P36873		0	3.35809e+06	0.025	0.1052	2.75662	2	1201.63	-0.0346455	44.7628	0	C1203	37.04	B1503	0.0555
Medium	KAYHEQLSV	2	6	6	Q71U36;P68363;Q13748;Q6PEY2;P68366;Q9NY65		0	5.69203e+06	0.025	0.1061	2.55289	2	1074.56	-0.41008	27.4752	0	C1203	81.48	C1203	0.1001
Medium	AAYDKVRKA	2	1	1	Q9NVM6		0	2.04275e+06	0.025	0.108	2.46759	2	1021.58	-0.22454	17.4717	0	C1203	55.56	C1203	0.3316
Medium	AKGPGLFF	4	2	2	Q9NP85;P27105		0	7.63823e+06	0.025	0.1058	2.4466	2	836.467	0.0586193	57.019	0	C1203	33.33	B1503	1.9107
Medium	AKKKANLQY	1	1	1	P17980		0	1.59041e+06	0.025	0.1068	2.27566	2	1063.63	-0.334159	17.1146	0	C1203	44.44	B1503	0.0457
Medium	TTVELANKV	1	1	1	O75533		0	2.96095e+06	0.025	0.1085	2.27315	2	974.551	-0.299727	37.5947	0	C1203	70.37	A6802	0.0153
Medium	LKPGMVVTF	2	2	2	P68104;Q5VTE0		0	4.35636e+06	0.025	0.1045	2.23967	2	991.565	0.123572	57.6934	0	C1203	44.44	B1503	0.3724
Medium	GAYEQVIKY	4	1	1	P98194		0	1.34748e+07	0.025	0.1064	2.2017	2	1070.55	-0.482219	46.1959	0	C1203	88.89	C1203	0.0474
Medium	FTFGSKVTY	1	1	1	Q4LDE5		0	3.24213e+06	0.025	0.108	2.19856	2	1049.53	-0.515102	51.7131	0	C1203	85.19	C1203	0.0093
Medium	HQKKEFVKY	2	1	1	Q9BUL8		0	947235	0.025	0.1047	2.19256	3	1206.66	0.073154	18.1359	0	C1203	40.74	B1503	0.0105
Medium	HKVANTSSF	2	1	1	O43683		0	885261	0.025	0.1079	2.18149	2	990.5	-0.183373	20.4065	0	C1203	29.63	B1503	0.0176
Medium	HKVSPmLY	1	1	1	Q13619	M6(Oxidation)	0	4.31753e+06	0.025	0.1083	2.17175	2	990.507	-0.378071	28.8921	0	C1203	26.67	B1503	0.8772
Medium	FLKPDDIQY	1	1	1	O75533		0	0	0.025	0.1063	2.16473	2	1138.58	-0.868983	55.3717	0	C1203	51.85	B1503	0.1694
Medium	RKPFGSKMY	1	1	1	A5YKK6		0	1.63235e+06	0.025	0.1055	2.15153	2	1113.59	-0.184537	22.7519	0	C1203	40.74	B1503	0.2973
Medium	DLmAPQPGV	2	1	1	Q96B49	M3(Oxidation)	0	2.42134e+06	0.025	0.1052	2.09744	2	943.455	0.0907671	55.0541	0	C1203	37.04	A6802	0.2434
Medium	LVSPITGEKI	1	1	1	Q15459		0	1.95329e+06	0.025	0.107	2.05799	2	1056.63	-1.32843	51.5649	0	C1203	20	A6802	1.2718
Medium	FTYGAVVHY	1	1	1	Q96PZ7		0	3.33178e+06	0.025	0.1041	1.93986	2	1056.51	-0.559836	52.3991	0	C1203	85.19	C1203	0.0087
Medium	RAYPAAITI	1	1	1	O95071		0	7.28707e+07	0.025	0.1067	1.70172	2	975.561	-1.5527	50.2658	0	C1203	85.19	C1203	0.0033
Medium	GKHQPHKVTQY	2	2	2	P83881;Q969Q0		0	1.71035e+07	0.026	0.1133	2.58333	3	1322.7	0.179639	16.1564	0		0	B1503	1.4107
Medium	EVIWLTQHV	1	1	1	Q9UJW0		0	1.32958e+06	0.026	0.1112	2.3533	2	1124.61	0.108171	63.1218	0	C1203	37.04	A6802	0.0285
Medium	ETYQFSGVYV	1	1	1	P61160		0	8.57367e+06	0.026	0.1097	2.19656	2	1192.55	-0.145753	70.8245	0	C1203	45.71	A6802	0.0448
Medium	VKIAGGTSL	1	1	1	Q9H6T0		0	593379	0.026	0.1121	2.08886	2	845.509	0.14501	37.3831	0	C1203	40.74	B1503	0.0432
Medium	KAFHSPRSY	1	1	1	Q8IYI8		0	435831	0.027	0.1168	2.3959	2	1092.56	-0.34619	18.9966	0	C1203	85.19	C1203	0.037
Medium	RKHDDDRRF	1	3	3	P98168;P98169;Q2QGD7		0	397298	0.027	0.1151	2.36804	3	1244.62	0.499602	15.5416	0	C1203	37.04	B1503	0.163
Medium	EVNKVISSV	3	1	1	Q93008		0	1.32315e+07	0.027	0.1136	2.26922	2	974.551	-0.299727	38.1838	0	C1203	40.74	A6802	0.0091
Medium	GKYGSSLEF	1	1	1	P55212		0	3.55309e+06	0.027	0.1142	2.23742	2	987.478	-0.333641	44.9618	0	C1203	44.44	B1503	0.008
Medium	TVADKIHSV	2	1	1	O95147		0	2.40178e+06	0.027	0.1163	2.22252	2	969.536	-0.0492847	27.7467	0	C1203	48.15	A6802	0.0033
Medium	HQFLSEQF	1	1	1	Q8TDB6		0	1.52655e+07	0.027	0.1172	2.15045	2	1035.49	-0.612435	51.4239	0	C1203	36.67	B1503	0.2817
Medium	YAFLREAL	1	1	1	Q15048		0	3.93061e+06	0.027	0.115	2.04618	2	982.535	-0.299578	58.4603	0	C1203	83.33	C1203	0.5827
Medium	EVYPGQQYL	1	1	1	Q8NF64		0	2.37825e+06	0.027	0.1178	1.93816	2	1096.53	0.0749255	62.652	0	C1203	48.15	A6802	0.0118
Medium	HQYPGRGVY	1	1	1	Q9H3P7		0	1.62893e+06	0.027	0.1174	1.91616	2	1076.53	-0.522396	24.5689	0	C1203	51.85	B1503	0.0011
Medium	HKSPDGRTY	1	1	1	O75400		0	726339	0.028	0.1205	2.57472	2	1060.52	-0.273516	15.8734	0	C1203	55.56	B1503	0.0347
Medium	IASAIVNEL	1	1	1	Q9NR09		0	2.80337e+06	0.028	0.1179	2.26419	2	929.53	-0.471792	64.1661	0	C1203	85.19	C1203	0.052
Medium	AAYGAHKVY	1	1	1	P33897		0	480274	0.028	0.1186	2.16099	2	979.499	-0.551571	22.5682	0	C1203	92.59	B1503	0.0264
Medium	SVFTFVAEV	1	1	1	Q7Z429		0	1.59469e+06	0.028	0.1191	2.1434	2	998.519	0.0856052	84.6767	0	C1203	48.15	A6802	0.0314
Medium	SASKIIVFV	3	1	1	O15439		0	1.3093e+07	0.028	0.1189	2.1104	2	963.586	-1.20597	58.6745	0	C1203	85.19	A6802	0.0512
Medium	FASEYPLIL	1	1	1	Q9UPR0		0	3.61392e+06	0.028	0.1193	2.04255	2	1052.57	-0.0965183	84.1638	0	C1203	92.59	C1203	0.0334
Medium	RSLLLLSAF	1	1	1	P50454		0	3.75064e+06	0.028	0.1185	1.68938	2	1019.62	-0.156834	75.1985	0	C1203	59.26	B1503	1.039
Medium	RAYDGTTYL	1	1	1	Q53GS9		0	7.57045e+06	0.029	0.1213	2.26069	2	1059.51	-0.139427	41.1692	0	C1203	81.48	C1203	0.0009
Medium	AAAELIKEV	1	1	1	Q13425		0	2.17852e+06	0.029	0.1225	2.24139	2	943.546	-0.372504	45.917	0	C1203	96.3	C1203	0.2775
Medium	FTITPPTAQV	3	1	1	P52907		0	6.40924e+06	0.029	0.1213	2.01745	2	1074.58	-0.545552	67.596	0	C1203	51.43	A6802	0.022
Medium	EVSKAIINI	1	1	1	Q9NXP7		0	1.86267e+07	0.029	0.1239	1.82941	2	986.588	-0.49489	52.0145	0	C1203	40.74	A6802	0.0225
Medium	LKVKGNVF	1	1	1	P84098		0	1.75801e+06	0.029	0.1239	1.76374	2	904.561	-0.0689108	32.8242	0	C1203	33.33	B1503	1.1998
Medium	SQRAGLQF	2	2	2	Q71UI9;P0C0S5		0	4.19571e+06	0.03	0.1263	2.51464	2	906.479	-0.0636801	36.5605	0	C1203	26.67	B1503	0.0897
Medium	KQADPFASL	2	1	1	Q5SR56		0	7.8272e+06	0.03	0.1295	2.23885	2	976.509	-1.05953	50.8408	0	C1203	44.44	B1503	0.0148
Medium	TTFEHDIQAL	1	1	1	Q01082		0	1.68212e+07	0.03	0.1248	2.13585	2	1174.57	-0.225872	53.4367	0	C1203	57.14	A6802	0.1885
Medium	DAFPKRIL	2	1	1	O14628		0	6.96057e+06	0.03	0.1296	2.07272	2	959.567	-0.278354	61.0952	0	C1203	83.33	C1203	5.4072
Medium	RQGTPLIAF	2	1	1	Q2NL82		0	3.85792e+07	0.03	0.1253	2.06542	2	1002.57	-0.399802	56.4136	0	C1203	33.33	B1503	0.0066
Medium	TTTHITKTV	2	2	2	O43491;Q9Y2J2		0	1.25053e+06	0.03	0.129	2.04995	2	1001.56	-0.368302	20.274	0	C1203	74.07	A6802	0.0595
Medium	RQFmAETQF	1	1	1	Q14444	M4(Oxidation)	0	2.97999e+06	0.03	0.1284	1.97695	2	1173.54	-0.279762	42.3991	0	C1203	33.33	B1503	0.0046
Medium	RVAGIHKKV	1	1	1	P26373		0	1.23163e+07	0.03	0.1279	1.8646	2	1007.65	-0.349408	16.0624	0	C1203	48.15	C1203	0.7519
Medium	ITADVNHNL	1	1	1	Q16222		0	3.25836e+06	0.03	0.1269	1.86088	2	996.51	-0.560717	36.694	0	C1203	74.07	A6802	0.0184
Medium	GKVFRHNSY	1	3	3	Q9HCG1;Q96SE7;Q9H7R5		0	217411	0.03	0.126	1.83785	2	1107.57	-0.263554	17.9402	0	C1203	37.04	B1503	0.1536
Medium	SASPIFTHV	1	1	1	Q9HCG8		0	2.11609e+06	0.03	0.1262	1.65552	2	958.499	-0.102445	46.7274	0	C1203	85.19	A6802	0.0323
Medium	TKFPAEQYY	1	1	1	Q15631		0	939649	0.031	0.1316	2.39259	2	1146.55	-0.0566154	46.6874	0	C1203	48.15	B1503	0.0348
Medium	AKLAGDHIEY	1	1	1	Q15070		0	649940	0.031	0.1332	2.28336	2	1116.57	-0.577375	33.7548	0	C1203	37.14	B1503	0.1821
Medium	EVVDKINQV	1	1	1	Q8WXH0		0	7.35149e+06	0.031	0.1307	2.26082	2	1043.57	-0.850996	39.1294	0	C1203	44.44	A6802	0.0052
Medium	HQKLGIAY	1	1	1	Q9HB58		0	5.20715e+06	0.031	0.1332	2.23006	2	929.52	-0.174391	30.91	0	C1203	36.67	B1503	0.1127
Medium	YKKELEKTY	1	1	1	P02545		0	767016	0.031	0.1324	2.19927	3	1201.65	-0.131874	19.6958	0	C1203	51.85	B1503	0.0669
Medium	VANKIGII	1	1	1	P62750		0	1.33108e+06	0.031	0.1314	2.17928	2	827.535	-0.149434	44.3496	0	C1203	73.33	C1203	5.3015
Medium	GKTSLVQRY	1	1	1	O14966		0	433254	0.031	0.1327	2.02529	2	1051.59	-0.325577	24.681	0	C1203	44.44	B1503	0.3972
Medium	RHFGSSDTF	1	1	1	Q9Y485		0	837213	0.032	0.1363	2.51482	2	1053.47	-0.782817	26.9653	0	C1203	40.74	B1503	0.0866
Medium	GHYDRSKSL	1	1	1	Q14566		0	1.51659e+06	0.032	0.1356	2.4155	2	1062.53	-0.641185	16.9379	0	C1203	48.15	B1503	1.1813
Medium	ETADITHAL	2	1	1	Q15042		0	1.1334e+07	0.032	0.1374	2.17598	2	970.484	-0.236019	44.4091	0	C1203	74.07	A6802	0.0018
Medium	RHKSHDNVY	2	1	1	Q86SQ0		0	729946	0.032	0.1344	1.99053	2	1155.57	0.0657568	15.4545	0	C1203	44.44	B1503	0.0798
Medium	KKLEDIRTRY	1	1	1	Q15393		0	1.49736e+06	0.032	0.1354	1.93449	3	1321.76	-0.0769492	23.2491	0	C1203	28.57	B1503	0.1573
Medium	ALFPYVVLL	1	1	1	Q9UN76		0	1.09314e+07	0.032	0.1382	1.93225	2	1034.63	-0.289837	102.688	0	C1203	59.26	C1203	0.3306
Medium	QLVDIIEKV	1	1	1	P61289		0	1.14582e+07	0.032	0.138	1.888	2	1056.63	-1.09738	65.7991	0	C1203	44.44	A6802	0.1489
Medium	RQFPSAFEF	2	1	1	Q13613		0	2.87807e+06	0.032	0.1346	1.86495	2	1128.55	-0.894117	62.3983	0	C1203	44.44	B1503	0.0038
Medium	ELLSRLEEL	1	1	1	P24821		0	2.67087e+06	0.033	0.1387	2.19915	2	1101.61	-2.13578	51.6863	0	C1203	44.44	A6802	1.6315
Medium	ETSDILQRV	2	1	1	Q14164		0	1.04204e+07	0.033	0.1399	1.8445	2	1060.56	-0.306837	47.5164	0	C1203	74.07	A6802	0.0048
Medium	IATEIILEI	2	1	1	P42892		0	3.37436e+07	0.033	0.1402	1.73539	2	1014.61	0.0705994	87.1408	0	C1203	81.48	C1203	0.142
Medium	RKLTELTQLY	1	1	1	Q9BWW8		0	6.95817e+06	0.033	0.1394	1.56474	3	1264.73	0.0122701	47.6593	0	C1203	31.43	B1503	0.5932
Medium	QQLLAQKGIY	1	2	2	P08183;P21439		0	2.02147e+06	0.034	0.1418	2.50571	2	1161.66	-0.547833	22.605	0	C1203	28.57	B1503	1.5272
Medium	YKVASAEY	1	1	1	Q15014		0	1.30065e+06	0.034	0.145	2.39036	2	930.457	0.0347926	32.302	0	C1203	40	B1503	0.5698
Medium	SVTERGFPSL	1	1	1	Q6ZUK4		0	7.78029e+06	0.034	0.1441	2.36962	2	1092.57	0.0711571	63.9383	0	C1203	31.43	A6802	1.6381
Medium	NIFRNVEV	2	2	2	Q7L523;Q5VZM2		0	1.7916e+07	0.034	0.1461	2.22181	2	990.535	-1.439	50.3431	0	C1203	50	A6802	4.4054
Medium	RAAEFIKNY	1	1	1	Q5XG87		0	1.7301e+06	0.034	0.1425	2.19917	2	1111.59	-0.426816	32.291	0	C1203	88.89	C1203	0.0378
Medium	ASVVVPIII	1	1	1	Q9NZV1		0	2.13313e+06	0.034	0.1467	2.036	2	910.597	-0.486471	89.4773	0	C1203	70.37	C1203	2.2691
Medium	QKYAGKDGY	1	1	1	P31949		0	1.17721e+06	0.034	0.1413	2.00026	2	1029.5	-0.557604	17.8048	0	C1203	40.74	B1503	0.2254
Medium	AQPETRVSY	2	1	1	Q5SWA1		0	8.61299e+06	0.034	0.1424	1.99223	2	1050.52	-0.416562	30.0488	0	C1203	48.15	B1503	0.0099
Medium	RAFGGILVV	1	1	1	Q8NHX9		0	8.18746e+07	0.034	0.1412	1.65886	2	931.572	-0.443607	62.46	0	C1203	92.59	C1203	0.0088
Medium	DVTAIIFVV	3	2	2	Q5JWF2;P63092		0	8.55508e+07	0.034	0.1457	1.57475	2	976.571	-0.263928	103.539	0	C1203	44.44	A6802	0.1107
Medium	GKFTEGNITY	2	1	1	Q7Z2W4		0	2.02528e+06	0.035	0.1478	2.08333	2	1129.55	-0.57181	42.6799	0	C1203	37.14	B1503	0.0356
Medium	ETIPLTAEKL	1	1	1	P24385		0	5.32421e+06	0.035	0.1485	1.66441	2	1114.63	-0.699912	54.605	0	C1203	51.43	A6802	0.0816
Medium	MSVHLPFAV	1	1	1	Q9NVA2		0	2.25323e+06	0.036	0.1541	2.39056	2	1000.53	-0.316327	71.1657	0	C1203	70.37	A6802	0.1714
Medium	EQSSVLITL	1	1	1	O75691		0	962488	0.036	0.1496	2.3426	2	989.551	-0.136633	72.7772	0	C1203	51.85	B1503	0.956
Medium	SQFINFPIY	2	1	1	P14625		0	1.08577e+06	0.036	0.1542	2.333	2	1128.57	0.202144	86.4796	0	C1203	40.74	B1503	0.0109
Medium	GKVFKHRSY	1	2	2	O43296;Q5CZA5		0	614956	0.036	0.1525	2.29231	2	1121.62	0.0323279	16.6581	0	C1203	40.74	B1503	0.2518
Medium	TAVTVNQSL	1	1	1	P05787		0	7.64233e+06	0.036	0.1538	2.26752	2	932.504	-0.483902	46.2656	0	C1203	74.07	C1203	0.3481
Medium	ETFPANIQVV	2	1	1	Q5VYK3		0	5.4677e+06	0.036	0.1526	2.23895	2	1117.59	-0.161647	72.179	0	C1203	60	A6802	0.0208
Medium	KKIRTSPTF	1	1	1	P62750		0	5.29959e+06	0.036	0.1508	2.23316	2	1077.64	-0.249016	21.3777	0	C1203	33.33	B1503	0.0145
Medium	YASYVYLSm	1	2	2	P02794;Q8N4E7	M9(Oxidation)	0	1.28653e+06	0.036	0.1544	2.19525	2	1112.5	-0.120989	64.8279	0	C1203	77.78	C1203	0.0939
Medium	KKVTGELAF	1	1	1	Q86XI2		0	2.84074e+06	0.036	0.1519	2.17878	2	992.577	-0.367995	34.7573	0	C1203	33.33	B1503	0.0155
Medium	TVTSVLEYL	2	1	1	O14893		0	6.17291e+06	0.036	0.1524	2.16457	2	1024.56	0.305286	83.7104	0	C1203	40.74	A6802	0.0717
Medium	IQKAVSEGY	1	1	1	P32320		0	438116	0.036	0.1529	2.08678	2	994.52	0.0734787	28.0117	0	C1203	37.04	B1503	0.0187
Medium	KKFSGKHVVF	1	1	1	P62081		0	1.78415e+06	0.036	0.1523	2.06327	2	1176.69	0.0417036	21.8986	0	C1203	48.57	B1503	0.0682
Medium	IQEESLRTY	1	2	2	Q99613;B5ME19		0	805847	0.036	0.153	2.04276	2	1138.57	-0.438657	37.8105	0	C1203	48.15	B1503	0.0154
Medium	GKVKVGVNGF	2	1	1	P04406		0	2703401	0.036	0.1537	2.00162	2	1004.59	-0.676865	34.0625	0	C1203	28.57	B1503	0.9725
Medium	FTSPLTHNV	1	1	1	Q96A29		0	2.33179e+06	0.036	0.154	1.93509	2	1015.52	-0.192895	44.2888	0	C1203	81.48	A6802	0.0046
Medium	IVRDIKEKL	1	11	11	P62736;Q9BYX7;P60709;P68032;P63261;P63267;P68133;Q6S8J3;A5A3E0;P0CG38;P0CG39		0	1.84678e+06	0.036	0.1534	1.63468	2	1113.7	-0.491491	27.8655	0	C1203	40.74	C1203	0.3335
Medium	GKAWGILTF	1	1	1	P82930		0	1.75266e+06	0.037	0.1575	2.64551	2	992.557	0.443329	71.4166	0	C1203	44.44	B1503	0.0271
Medium	AAYGELRAm	1	1	1	Q9UL46	M9(Oxidation)	0	485136	0.037	0.1567	2.33822	2	997.477	-0.0369781	32.6694	0	C1203	81.48	C1203	0.009
Medium	EVYRGKLIEA	1	1	1	P62318		0	5.05029e+06	0.037	0.155	2.33649	2	1177.66	-0.381443	34.9198	0	C1203	8.57	A6802	0.3445
Medium	TTFESSHYL	1	1	1	Q16531		0	4.07892e+06	0.037	0.1581	2.23578	2	1084.49	-0.587571	44.0857	0	C1203	74.07	A6802	0.0051
Medium	KSRPELLEY	1	1	1	Q14258		0	945090	0.037	0.1575	2.21925	2	1134.61	-0.419118	36.914	0	C1203	81.48	C1203	0.3804
Medium	KAFLNAIM	1	2	2	Q14839;Q8TDI0		0	3.65034e+06	0.037	0.1547	2.00291	2	907.507	-0.308355	57.1081	0	C1203	83.33	C1203	2.0118
Medium	STMISSIQVY	1	1	1	Q8WXF7		0	1.34222e+06	0.037	0.1575	1.98674	2	1128.56	-1.81827	63.8882	0	C1203	54.29	B1503	0.8532
Medium	QQVLLKVLY	1	1	1	O95373		0	2.22769e+06	0.037	0.1564	1.86185	2	1103.68	-0.038711	62.5885	0	C1203	40.74	B1503	0.274
Medium	ETAAFIERL	1	1	1	Q5UCC4		0	1.20157e+06	0.037	0.1558	1.8216	2	1049.56	-1.01972	55.8292	0	C1203	74.07	A6802	0.0152
Medium	YKKIREQEY	1	1	1	O43463		0	348619	0.037	0.1587	1.63887	2	1256.66	-0.107979	19.3607	0	C1203	44.44	B1503	0.3332
Medium	ETIGVVHLV	1	1	1	Q63HN8		0	4.94632e+07	0.037	0.1574	1.51839	2	966.561	-0.467983	57.7134	0	C1203	74.07	A6802	0.002
Medium	LSGLRQQSI	1	1	1	Q9HCX4		0	7.60905e+07	0.038	0.1601	2.49244	2	1001.57	-0.448737	81.629	0	C1203	59.26	C1203	5.0071
Medium	DVFHmVVEV	2	1	1	Q15181	M5(Oxidation)	0	1.36657e+07	0.038	0.1614	2.28214	2	1090.52	-0.0798338	68.7582	0	C1203	51.85	A6802	0.043
Medium	GKLPSSSSL	1	1	1	Q9C091		0	684609	0.038	0.1616	2.14146	2	875.483	-0.403829	32.4206	0	C1203	44.44	B1503	0.4439
Medium	GIQDIILRL	2	1	1	Q9UL15		0	7.76721e+07	0.038	0.1606	2.06628	2	1040.65	-0.609063	75.1773	0	C1203	48.15	C1203	1.2151
Medium	RKIANSDKY	1	1	1	O75164		0	233776	0.038	0.16	1.92963	2	1094.6	0.0577499	16.4322	0	C1203	37.04	B1503	0.0606
Medium	AAIDHQIEV	1	1	1	Q9Y485		0	1.1375e+07	0.038	0.1602	1.89667	2	995.515	-0.805772	41.9285	0	C1203	88.89	C1203	0.0259
Medium	IQRTPKIQV	1	1	1	P61769		0	2.92554e+06	0.038	0.1602	1.60931	2	1082.67	-0.0784647	32.0209	0	C1203	40.74	B1503	1.0263
Medium	FKGELIHVF	1	1	1	Q9H0P0		0	6.30309e+06	0.039	0.1644	2.33685	2	1089.61	-1.1321	55.1655	0	C1203	44.44	B1503	0.1705
Medium	FSVITVIGAL	2	1	1	Q53R12		0	2.80755e+07	0.039	0.1657	2.23609	2	1019.61	-0.336879	66.4202	0	C1203	57.14	A6802	3.8071
Medium	SRQESDTVSY	1	1	1	Q8IWB9		0	1.46245e+06	0.039	0.1637	2.19317	2	1171.52	0.441808	37.3273	0	C1203	31.43	B1503	0.176
Medium	ETAKLIEKL	2	1	1	P13639		0	2.22376e+08	0.039	0.1648	2.05711	2	1044.63	-0.993129	38.9912	0	C1203	74.07	A6802	0.0498
Medium	LRNQLQSVY	1	1	1	Q9BSM1		0	1.12072e+07	0.039	0.1634	2.0369	2	1120.61	-0.283772	37.9792	0	C1203	40.74	B1503	0.1483
Medium	AKFKSSIY	2	1	1	Q9Y6V7		0	6.39763e+06	0.039	0.1653	2.0209	2	943.524	-0.328172	27.0486	0	C1203	40	B1503	0.3481
Medium	NVAEINRQV	1	1	1	O43933		0	2.08644e+06	0.039	0.1635	1.96409	2	1042.56	-0.135174	32.8548	0	C1203	48.15	A6802	0.0092
Medium	TAFPKPLLT	1	1	1	Q9BZG8		0	5.4156e+06	0.039	0.1636	1.8272	2	987.588	0.182984	54.6356	0	C1203	55.56	C1203	0.9088
Medium	HTAIGAHPV	1	1	1	Q92567		0	497209	0.039	0.1652	1.64669	2	902.484	-0.350086	21.6866	0	C1203	70.37	A6802	0.032
Medium	SQLPKLLVY	1	1	1	P11117		0	2.85337e+06	0.04	0.1673	2.8952	2	1060.64	-1.8009	63.1384	0	C1203	51.85	B1503	0.0043
Medium	RQFEFSIDSF	2	1	1	Q96A09		0	1.87643e+06	0.04	0.1672	1.89474	2	1275.6	0.597826	71.0331	0	C1203	40	B1503	0.0261
Medium	YAFPYIILV	1	1	1	Q9P055		0	1.60402e+06	0.04	0.1677	1.76578	2	1098.62	-0.297487	102.23	0	C1203	96.3	C1203	0.0099
Medium	GKFASVFVY	1	1	1	Q8IZE3		0	1.80617e+06	0.041	0.1689	2.46753	2	1017.54	-1.0585	59.3479	0	C1203	48.15	B1503	0.0627
Medium	SKKPTGLFY	1	1	1	Q13459		0	8.35639e+06	0.041	0.1707	2.38344	2	1040.58	-0.683731	33.956	0	C1203	48.15	B1503	0.0571
Medium	KAFGSTIVI	1	1	1	Q13620		0	7.13854e+06	0.041	0.1694	2.28343	2	935.555	-0.731987	52.7068	0	C1203	81.48	C1203	0.0218
Medium	ERVNVALVY	1	1	1	Q9Y4C4		0	1.86974e+06	0.041	0.1707	2.26854	2	1062.59	-0.206627	29.8722	0	C1203	44.44	B1503	0.3173
Medium	RKDLFIATY	3	1	1	P32121		0	3.41392e+06	0.041	0.1696	2.26491	2	1126.62	-0.564315	46.07	0	C1203	44.44	B1503	0.0396
Medium	RKFDAPFTL	1	1	1	Q8IY50		0	4.54253e+06	0.041	0.1709	2.1754	2	1094.6	-0.622044	51.6572	0	C1203	51.85	B1503	0.0288
Medium	EVFFDGVRV	1	1	1	P49748		0	3.6965e+06	0.041	0.1706	2.10882	2	1067.55	-0.372777	64.2506	0	C1203	44.44	A6802	0.0111
Medium	KKSRFGNAF	1	1	1	Q6P2Q9		0	1.33818e+06	0.041	0.1708	1.96365	2	1054.58	-0.250535	21.4914	0	C1203	33.33	B1503	0.015
Medium	HKVISGTTL	1	1	1	Q9NUL3		0	3.53423e+06	0.041	0.1707	1.81558	2	955.557	-0.410275	26.3274	0	C1203	40.74	B1503	0.2142
Medium	TVEDIAHRL	1	1	1	P54707		0	1.81108e+06	0.042	0.1726	2.35508	2	1053.57	-0.471157	42.3922	0	C1203	40.74	A6802	0.1392
Medium	KSVDWLLVF	2	1	1	Q96J42		0	1.24078e+07	0.042	0.1727	2.21173	2	1106.62	0.264008	84.2368	0	C1203	70.37	C1203	0.219
Medium	IKKDSGKEF	1	1	1	Q9UEE5		0	0	0.042	0.174	2.19987	2	1051.58	-0.228962	16.6722	0	C1203	40.74	B1503	0.0808
Medium	ESFDSKFYV	1	1	1	Q5VV42		0	2.57988e+06	0.042	0.1724	2.16394	2	1121.52	0.380876	56.5283	0	C1203	74.07	A6802	0.0057
Medium	DVASIKEKV	1	1	1	Q13601		0	2.88224e+06	0.042	0.1759	2.15375	2	988.567	-0.269142	31.7655	0	C1203	44.44	A6802	0.0371
Medium	RKVDSKSLF	1	1	1	P31327		0	1.87172e+06	0.042	0.1759	2.12606	2	1079.62	-0.381961	25.2327	0	C1203	33.33	B1503	0.0192
Medium	FLPPCAQLL	1	1	1	O75843		0	3.58353e+06	0.042	0.1734	2.08093	2	1001.55	-0.0255367	91.8425	0	C1203	48.15	C1203	1.3807
Medium	QTVDIRAQL	1	1	1	Q96C10		0	5.75923e+06	0.042	0.1742	2.07967	2	1043.58	-0.499621	48.139	0	C1203	70.37	A6802	0.0198
Medium	ASFSDVRIL	1	1	1	Q9UK59		0	2.42834e+06	0.042	0.1758	1.95872	2	1007.55	-0.445629	59.4978	0	C1203	85.19	C1203	0.3197
Medium	VAFPKSLVA	4	1	1	Q8IWI9		0	1.44451e+07	0.042	0.1723	1.94821	2	931.561	-0.105785	53.9387	0	C1203	59.26	C1203	0.1419
Medium	KKVSKAAIL	2	1	1	O00767		0	1.05736e+06	0.042	0.1736	1.68763	2	957.646	-0.0270337	19.5409	0	C1203	40.74	B1503	0.7511
Medium	SQFHGLITHY	1	1	1	Q92845		0	2.50757e+06	0.043	0.1777	2.27796	3	1202.6	0.0833896	41.9288	0	C1203	42.86	B1503	0.0242
Medium	FTSSRHTVV	1	1	1	Q9NZ01		0	8.98577e+06	0.043	0.1782	2.08962	2	1033.54	-0.731131	22.2478	0	C1203	81.48	C1203	0.2567
Medium	HVLKTLQEL	1	1	1	Q6ZUX3		0	1.49427e+06	0.043	0.1801	2.06686	2	1080.64	-0.159619	41.3202	0	C1203	40.74	C1203	0.2228
Medium	EGSPIKVTL	1	1	1	P06748		0	1.04712e+07	0.043	0.1768	2.06571	2	943.545	-0.620654	51.4718	0	C1203	55.56	A6802	0.9265
Medium	ETADVKASV	1	1	1	Q8N1F7		0	5.4473e+06	0.043	0.1777	1.89418	2	919.473	-0.154736	28.2547	0	C1203	74.07	A6802	0.0022
Medium	RGFGFVTY	2	3	3	Q32P51;P09651;P51991		0	4.24706e+06	0.043	0.1781	1.66588	2	946.478	-0.0912409	57.2423	0	C1203	33.33	B1503	0.7393
Medium	SVDSFQIIL	2	1	1	Q5VWP2		0	5.26322e+07	0.044	0.1807	1.95525	2	1021.56	-0.335168	76.104	0	C1203	44.44	C1203	0.9481
Medium	FSFPSIFIY	1	1	1	O43913		0	1.47764e+07	0.044	0.1806	1.80477	2	1120.57	-0.375567	102.563	0	C1203	85.19	C1203	0.0236
Medium	RLIPHVQVF	1	1	1	Q9HD20		0	3.77923e+06	0.044	0.1835	1.76272	2	1108.66	-1.07945	51.443	0	C1203	44.44	B1503	0.0042
Medium	KQFGNILIL	1	1	1	P52788		0	1.63333e+07	0.044	0.1843	1.60563	2	1045.64	-0.293583	67.195	0	C1203	51.85	B1503	0.0291
Medium	LSLSSEDPVL	1	2	2	Q13507;Q9HCX4		0	0	0.045	0.1879	2.40139	2	1059.56	-0.643059	78.1732	0	C1203	57.14	C1203	18.2392
Medium	GLASLVQVF	1	1	1	Q5T1A1		0	3.12085e+06	0.045	0.187	2.28963	2	933.54	-0.379886	48.3275	0	C1203	44.44	B1503	0.3084
Medium	IKHPNSIEY	1	1	1	Q7L7X3		0	3.63711e+06	0.045	0.1872	2.02904	2	1100.57	-0.090356	28.6806	0	C1203	51.85	B1503	0.0063
Medium	RKIEDNEFHY	1	1	1	O43847		0	780171	0.045	0.189	1.97146	3	1350.64	-0.308829	30.3567	0	C1203	28.57	B1503	0.311
Medium	RQLQQLISF	1	1	1	Q9NXV6		0	3.3921e+06	0.045	0.1905	1.73838	2	1132.65	-0.624428	61.2996	0	C1203	33.33	B1503	0.0064
Medium	EAADVLIKA	1	1	1	Q7Z6Z7		0	1.28376e+07	0.045	0.1879	1.44441	2	929.53	-0.679538	44.5949	0	C1203	48.15	A6802	0.0313
Medium	KKAHLGTAL	1	1	1	P62266		0	5.45215e+06	0.046	0.1947	2.44184	2	938.578	-0.377035	19.1286	0	C1203	40.74	B1503	0.1968
Medium	RKRPVPKGATY	1	1	1	P61313		0	7.01948e+06	0.046	0.1912	2.07532	3	1272.75	0.194093	17.2982	0		0	B1503	0.1749
Medium	AAAALVLKA	1	1	1	Q9Y490		0	1.18387e+06	0.046	0.1923	2.0558	2	827.534	-0.604051	43.1107	0	C1203	51.85	A6802	2.3474
Medium	RHSDIVVLY	1	1	1	Q6PCD5		0	5.03022e+06	0.046	0.1936	1.9339	2	1101.6	-0.555112	43.4388	0	C1203	51.85	B1503	0.0314
Medium	STYEGKPIFL	1	1	1	Q9NU02		0	926288	0.046	0.1949	1.91981	2	1154.61	0.0512974	55.8618	0	C1203	60	A6802	0.1994
Medium	YSFDRAAVLHV	1	1	1	Q13683		0	1.78119e+07	0.046	0.1932	1.24221	3	1277.66	0.0392721	40.6589	0		0	A6802	1.7009
Medium	SAADIPINI	1	1	1	P21333		0	4.08497e+06	0.047	0.1987	2.39222	2	913.499	-0.291708	70.2697	0	C1203	81.48	A6802	0.0244
Medium	VKRGDESQF	1	1	1	P57076		0	1.17327e+06	0.047	0.2017	2.36479	2	1065.53	-0.119319	19.1799	0	C1203	37.04	B1503	0.1282
Medium	ESIRFFVNV	1	1	1	Q8NBS3		0	4.17892e+06	0.047	0.1984	2.18269	2	1110.59	-0.0967863	68.469	0	C1203	70.37	A6802	0.0572
Medium	AQLRGQHFY	1	1	1	Q15654		0	1.12803e+06	0.047	0.2024	2.02552	2	1119.57	0.0663707	29.0238	0	C1203	40.74	B1503	0.0233
Medium	RQKDVKDGKY	1	1	1	P62269		0	464980	0.047	0.2014	1.93301	3	1236.67	0.245154	15.4559	0	C1203	34.29	B1503	0.1723
Medium	AAQPQPSVA	1	1	1	Q96KR1		0	3.00461e+06	0.047	0.2036	1.83013	2	868.453	0.2429	30.0892	0	C1203	55.56	C1203	2.9014
Medium	HHVIARHEY	1	1	1	Q8WUH1		0	216440	0.047	0.2022	1.70316	2	1161.59	0.0110385	16.9634	0	C1203	40.74	B1503	0.2537
Medium	TTFNIDDQYL	1	1	1	Q14697		0	2.49314e+06	0.047	0.2012	1.45891	2	1229.57	-0.167861	72.5317	0	C1203	57.14	A6802	0.4507
Medium	KSGPTSYL	1	1	1	Q5T686		0	1.40856e+06	0.048	0.2066	2.4521	2	852.446	-0.175747	34.1149	0	C1203	70	C1203	6.0005
Medium	AMRLGAEVY	1	1	1	P09104		0	4.46198e+06	0.048	0.2169	2.38926	2	1009.51	-0.528188	45.3822	0	C1203	44.44	B1503	0.0456
Medium	YKASSGLLY	1	1	1	Q08945		0	3.32138e+06	0.048	0.2067	2.38463	2	1001.53	-0.590747	43.2339	0	C1203	51.85	B1503	0.0233
Medium	FVSTPSLVY	1	1	1	P36382		0	1.23981e+08	0.048	0.2138	2.18229	2	1012.53	-0.041077	77.2565	0	C1203	51.85	C1203	0.1397
Medium	LATVLGRF	1	1	1	P27708		0	852245	0.048	0.2061	2.04558	2	876.53	0.125194	56.3286	0	C1203	66.67	C1203	8.7513
Medium	ETFGMKLSV	1	2	2	Q9GZQ8;A6NCE7		0	8.32561e+06	0.048	0.2144	1.97187	2	1011.52	-0.250619	58.4959	0	C1203	77.78	A6802	0.0094
Medium	EVAKIIYIV	1	1	1	P25788		0	1.40935e+07	0.048	0.2054	1.53589	2	1047.64	-0.0747492	65.0195	0	C1203	44.44	A6802	0.0073
Medium	EVQNILSFL	1	1	1	Q96AC1		0	1.95945e+06	0.048	0.2142	1.43245	2	1062.58	-0.436832	96.0019	0	C1203	37.04	A6802	0.0795
Medium	KKFESPNIL	2	1	1	Q8NB16		0	2.29283e+07	0.049	0.2271	2.66389	2	1075.61	-2.26948	38.3034	0	C1203	48.15	B1503	0.0999
Medium	AKAQALVQY	1	1	1	Q9Y2Q5		0	0	0.049	0.2186	2.3704	2	991.557	-0.456934	36.7855	0	C1203	48.15	B1503	0.011
Medium	FSQGEVImDF	1	1	1	Q8IZF5	M8(Oxidation)	0	0	0.049	0.22	2.17314	2	1188.52	0.103734	62.3809	0	C1203	60	B1503	3.9725
Medium	ASAIPTAIDF	1	1	1	P43359		0	4.47786e+06	0.049	0.2221	2.05486	2	1005.53	-0.118632	48.7123	0	C1203	62.86	B1503	2.7664
Medium	EVFDKTYQFL	1	1	1	Q96EU6		0	1.77337e+06	0.049	0.2203	2.01177	2	1289.64	-0.558893	67.7963	0	C1203	48.57	A6802	0.0732
Medium	EVPFFPARV	1	1	1	P48200		0	1.90893e+06	0.049	0.2255	1.86161	2	1061.58	-0.319386	65.3081	0	C1203	40.74	A6802	0.0212

## Sheet: Statistics
Total_Peptides	Tool	A*68:02	B*15:03	C*12:03
1414	Total Syfpeithi allelecoverage with threshold	0	0	370
	Total Syfpeithi allelecoverage with threshold %	0.0000	0.0000	0.2617
	Total NetMHC allelecoverage with threshold	0	0	0
	Total NetMHC allelecoverage with threshold %	0.0000	0.0000	0.0000
	Total NetMHC allelecoverage with 50nM threshold	0	0	0
	Total NetMHC allelecoverage with 50nM threshold %	0.0000	0.0000	0.0000
	Best Syfpeithi	0	0	1289
	Best Syfpeithi %	0.0000	0.0000	0.9116
	Best NetMHC	0	0	0
	Best NetMHC %	0.0000	0.0000	0.0000
	Best Syfpeithi with threshold	0	0	370
	Best Syfpeithi with threshold %	0.0000	0.0000	0.2617
	Best NetMHC with threshold	0	0	0
	Best NetMHC with threshold %	0.0000	0.0000	0.0000
	Best NetMHC with 50nM threshold	0	0	0
	Best NetMHC with 50nM threshold %	0.0000	0.0000	0.0000
